# Supplementary material
Source: PubMed Central journal article supplement (PMC7086343)

## Supporting Information

# Three-Component Olefin Dicarbofunctionalization Enabled by Nickel/Photoredox Dual Catalysis

Mark W. Campbell,<sup>†</sup> Jordan S. Compton,<sup>†</sup> Christopher B. Kelly,<sup>\*,‡,§</sup> Gary A. Molander<sup>\*,†</sup>

<sup>†</sup> Roy and Diana Vagelos Laboratories, Department of Chemistry, University of Pennsylvania, 231 South 34th Street, Philadelphia, Pennsylvania 19104-6323, United States.

<sup>‡</sup> Department of Chemistry, Virginia Commonwealth University, 1001 West Main Street, P. O. Box 842006 Richmond, VA 23284-9069, United States

<sup>§</sup> Medicines for All Institute, Virginia Commonwealth University, Biotech 8 737 N. 5th Street, Richmond, VA 23219-1441 United States

\* To whom correspondence should be addressed. E-mail: [gmolandr@sas.upenn.edu](mailto:gmolandr@sas.upenn.edu) & [cbkelly@vcu.edu](mailto:cbkelly@vcu.edu)

|                                                                       |            |
|-----------------------------------------------------------------------|------------|
| <b>General Considerations</b>                                         | <b>S2</b>  |
| <b>Preparation of NiBr<sub>2</sub>(bpy)</b>                           | <b>S3</b>  |
| <b>Synthesis of Aryl- and Heteroaryl Bromides</b>                     | <b>S4</b>  |
| <b>Synthesis of Bis(Catecholato)diboron</b>                           | <b>S10</b> |
| <b>Synthesis of Organotrifluoroborates</b>                            | <b>S11</b> |
| <b>Synthesis of Non-Commercial Giese Acceptors</b>                    | <b>S18</b> |
| <b>Optimization and Control Studies</b>                               | <b>S21</b> |
| <b>General Procedure for Dicarbofunctionalization (DCF)</b>           | <b>S25</b> |
| <b>Procedure for Scale-up of Dicarbofunctionalization</b>             | <b>S50</b> |
| <b>Functionalization of Bpin-Containing DCF Products</b>              | <b>S51</b> |
| <b>Synthesis of an Intermediate to TK-666 and Related Derivatives</b> | <b>S54</b> |
| <b>Limitations of the Method</b>                                      | <b>S58</b> |
| <b>Mechanistic Experiments</b>                                        | <b>S60</b> |
| <b>Crystallographic Data</b>                                          | <b>S62</b> |
| <b>References</b>                                                     | <b>S95</b> |
| <b>Spectra of Synthesized Compounds</b>                               | <b>S97</b> |

**General Considerations:** All chemical transformations requiring inert atmospheric conditions or vacuum distillation utilized Schlenk line techniques with a 4- or 5-port dual-bank manifold. LED irradiation was accomplished using the LED reactor described in our previous report.<sup>1</sup> Tetrahydrofuran was dried using a solvent delivery system. All reagents were purchased and used as received from suppliers unless otherwise noted. Nickel pre-complexes were prepared as described here. The transition metal photocatalysts (Ru(bpy)<sub>3</sub>(PF<sub>6</sub>)<sub>2</sub> and [Ir{dFCF<sub>3</sub>ppy}<sub>2</sub>(bpy)]PF<sub>6</sub>) were prepared in-house by the procedure outlined in our previous publications;<sup>2</sup> others were purchased from commercial sources. The organic photocatalysts 4CzIPN and Cl-4CzIPN were prepared in-house by the procedure outlined in our previous publication.<sup>3</sup> Aryl- and heteroaryl bromides were either purchased from commercial sources, prepared as previously reported,<sup>4</sup> or prepared as outlined here. Potassium alkyltrifluoroborates were either purchased from commercial sources or prepared by the methods outlined here. Solvents were purified with drying cartridges through a solvent delivery system. Reactions were monitored by GC/MS or TLC using silica gel F<sub>254</sub> plates (60 Å porosity, 250 µm thickness). TLC analysis was performed using EtOAc/hexanes, CH<sub>2</sub>Cl<sub>2</sub>/hexanes, or EtOAc with 1% MeOH/hexanes and visualized using permanganate stain, Seebach's stain,<sup>5</sup> CAM (Hanessian's) stain, and/or UV light. Silica plugs utilized flash silica gel (60 Å porosity, 32-63 µm). Flash chromatography was accomplished using an automated system (monitoring at 254 nm and 280 nm) with silica cartridges (60 Å porosity, 20-40 µm). Accurate mass measurement analyses were conducted using electron ionization (EI) or electrospray ionization (ESI). The signals were mass measured against an internal lock mass reference of perfluorotributylamine (PFTBA) for EI-GCMS, and leucine enkephalin for ESI-LCMS. The utilized software calibrates the instruments and reports measurements by use of neutral atomic masses. The mass of the electron is not included. IR spectra were recorded using either neat oil or solid products. Melting points (°C) are uncorrected. NMR spectra [<sup>1</sup>H, <sup>13</sup>C {<sup>1</sup>H}, <sup>11</sup>B, <sup>19</sup>F {<sup>1</sup>H}] were obtained at 298 K. <sup>1</sup>H NMR (500.4 MHz) chemical shifts are referenced to residual, non-deuterated CHCl<sub>3</sub> (δ 7.26) in CDCl<sub>3</sub> and acetone-*d*<sub>5</sub> (δ 2.09) in acetone-*d*<sub>6</sub>. <sup>13</sup>C {<sup>1</sup>H} NMR (125.8 MHz) chemical shifts are reported relative to CDCl<sub>3</sub> (δ 77.3) and the carbonyl carbon of acetone (δ 205.9). <sup>11</sup>B NMR (128.4 MHz) chemical shifts are uncorrected. <sup>19</sup>F NMR spectra were referenced to hexafluorobenzene (δ -161.64 in CDCl<sub>3</sub> or -164.67 in acetone-*d*<sub>6</sub>).<sup>6</sup> Data are presented as follows: chemical shift (ppm), multiplicity (s = singlet, d = doublet, t = triplet, q = quartet, m = multiplet, br = broad), coupling constant *J* (Hz) and integration.

## Preparation of Nickel Bromide Bipyridine [NiBr<sub>2</sub>(bpy)]

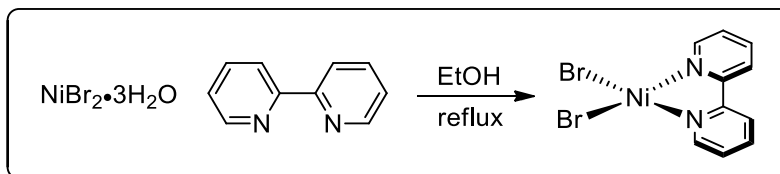

A flask was charged with NiBr<sub>2</sub>·3H<sub>2</sub>O (5.45 g, 20.0 mmol, 1.00 equiv) and 2,2'-bipyridine (3.28 g, 21.0 mmol, 1.05 equiv) and evacuated and purged with argon three times. Absolute EtOH (75 mL) was added, and the suspension was heated to a vigorous reflux for 24 h. During the refluxing period the color of the suspension changed from light brown to yellow/green. The resulting suspension was cooled to rt and filtered through a medium porosity fritted glass funnel and washed with Et<sub>2</sub>O (3 × 150 mL). The resulting powder was dried under high vacuum at 50 °C for 24 h and stored in a desiccator. This complex is hygroscopic, and absorption of H<sub>2</sub>O from the atmosphere is accompanied by a change in color (dull yellow/green to bright blue). We observed that the efficacy of the dicarbofunctionalization reaction was dependent upon the anhydrous nature of the nickel catalysts.<sup>7</sup>

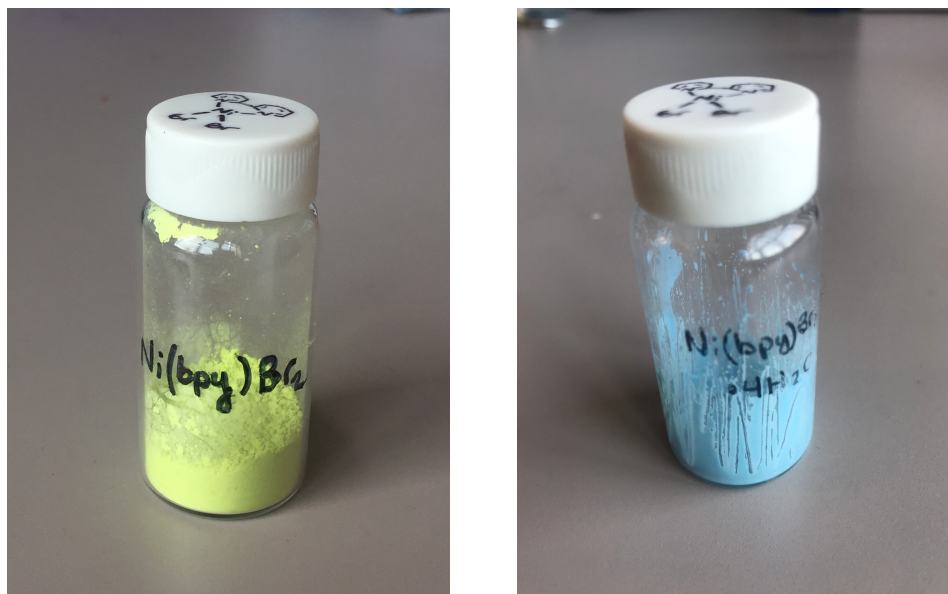

**Figure S1.** (Left) A sample of anhydrous Ni(bpy)Br<sub>2</sub> (Right) A sample of hydrated Ni(bpy)Br<sub>2</sub>

## Synthesis of Aryl and Heteroaryl Bromides

### 7-Bromo-1-methyl-5-phenyl-1H-benzo[e][1,4]diazepin-2(3H)-one

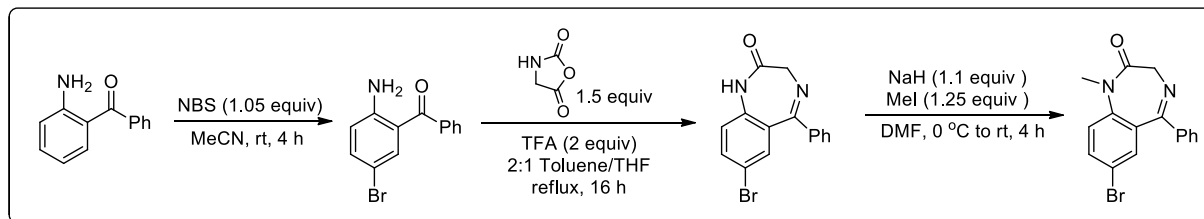

#### Bromination

To a 100 mL flask equipped with a stirrer bar was added 2-aminobenzophenone (0.510 g, 2.60 mmol, 1 equiv) followed by MeCN (30 mL). The flask was then cooled to 0 °C via an ice/water bath. After 10 min, NBS (0.483 g, 2.71 mmol, 1.05 equiv) was added to the reaction in five portions over the course of 50 min. The mixture was stirred at rt for 3 h. The solvent was then removed *in vacuo* by rotary evaporation. The resulting crude solid was taken up in a 1:1 Et<sub>2</sub>O/EtOAc soln (30 mL). This soln was then washed with deionized H<sub>2</sub>O (30 mL) followed by brine (30 mL). The organic layer was dried (Na<sub>2</sub>SO<sub>4</sub>), and the solvent was removed *in vacuo* by rotary evaporation. The crude solid was recrystallized from hexanes/Et<sub>2</sub>O (2:1) to yield (2-amino-5-bromophenyl)(phenyl)methanone as yellow needles (0.509 g, 71%). All data matched that reported in the literature.<sup>8</sup>

#### Condensation/Annulation

To a 100 mL flask equipped with a stirrer bar was added (2-amino-5-bromophenyl)(phenyl)methanone (1.11 g, 4.00 mmol, 1 equiv) dissolved in a 2:1 mixture of toluene and THF (60 mL). Oxazolidinone-2,5-dione (0.505 g, 5.00 mmol, 1.25 equiv) was added in one portion followed by CF<sub>3</sub>CO<sub>2</sub>H (0.91 g, 0.61 mL, 8.0 mmol, 2 equiv). The reaction mixture was heated at reflux overnight. The reaction mixture was concentrated *in vacuo* by rotary evaporation. The resulting crude solid was taken up in EtOAc (30 mL) and washed with satd aq NaHCO<sub>3</sub> (30 mL). The layers were separated, and the aq layer was extracted with EtOAc (2 × 30 mL). The organic layer was washed with brine (100 mL) and dried (Na<sub>2</sub>SO<sub>4</sub>). The solvent was removed *in vacuo* by rotary evaporation to give the crude annulation product. The crude solid was purified *via* SiO<sub>2</sub> column chromatography to yield 7-bromo-5-phenyl-1H-benzo[e][1,4]diazepin-2(3H)-one as a crystalline, yellow solid (0.44 g, 35%). All data matched that reported in the literature.<sup>9</sup>

### Methylation

To a slurry of NaH (35 mg, 1.47 mmol, 1.1 equiv) in anhyd DMF (10 mL) cooled to 0 °C in an ice-water bath was added 7-bromo-5-phenyl-1H-benzo[e][1,4]diazepin-2(3H)-one (0.420 g, 1.33 mmol, 1 equiv) dissolved in 5 mL of anhyd DMF, which resulted in vigorous bubbling. The reaction mixture was stirred for 30 min, after which MeI was added dropwise, neat. The reaction was allowed to stir for 4 h while coming to rt. The reaction mixture was diluted with H<sub>2</sub>O and EtOAc, and the layers were separated. The aq layer was extracted with EtOAc (3 × 15 mL). The organic layer was washed with brine, dried (Na<sub>2</sub>SO<sub>4</sub>), and concentrated *via* rotary evaporation. The crude solid was purified *via* silica gel chromatography to afford 7-bromo-1-methyl-5-phenyl-1H-benzo[e][1,4]diazepin-2(3H)-one as a powdery yellow solid (0.282 mg, 64%). All data matched that reported in the literature.<sup>10</sup>

### 2-(4-Bromophenyl)-1,3-dioxolane

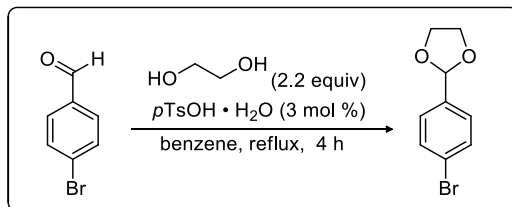

2-(4-Bromophenyl)-1,3-dioxolane was prepared *via* a modified literature procedure.<sup>11</sup> To a 50 mL round bottom flask equipped with a stirrer bar was added *p*-bromobenzaldehyde (0.485 g, 2.62 mmol, 1 equiv) followed by benzene (10 mL). The contents of the flask were stirred and, after 2 min, *p*-TsOH·H<sub>2</sub>O (15.0 mg, 0.0789 mmol, 0.03 equiv) and ethylene glycol (0.358 g, 0.322 mL, 5.77 mmol, 2.2 equiv) were added. The flask was equipped with a Dean-Stark trap and heated at reflux for 4 h. After cooling to rt, the reaction mixture was diluted with EtOAc (20 mL) and transferred to a separatory funnel. The organic layer was washed with cold, deionized H<sub>2</sub>O (30 mL). The organic layer was then washed with brine (30 mL) and dried (Na<sub>2</sub>SO<sub>4</sub>). The solvent was removed *in vacuo* by rotary evaporation to yield 2-(4-bromophenyl)-1,3-dioxolane as a colorless oil (0.585 g, 97%). All data matched that reported in the literature.<sup>12</sup>

### 1-Bromo-3-(methoxymethoxy)benzene

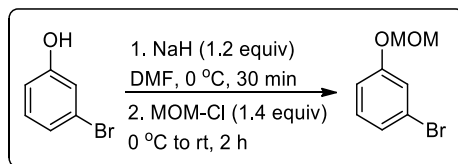

1-Bromo-3-(methoxymethoxy)benzene was prepared via a modified literature procedure.<sup>13</sup> To a 100 mL round bottom flask equipped with a stirrer bar was added NaH (0.230 g, 9.60 mmol, 1.2 equiv). The flask was sealed with a rubber septum and placed under an Ar atmosphere via an inlet needle. The flask was charged with anhyd DMF (24 mL) and then cooled to 0 °C in an ice-water bath. After 5 min, a soln of 3-bromophenol (1.38 g, 8.00 mmol, 1 equiv) in anhyd DMF (5 mL) was added to the flask. **CAUTION: Evolves H<sub>2</sub> gas!** The mixture was stirred for 30 min at 0 °C. After this time, a soln of MOM-Cl (0.902 g, 0.85 mL, 11.2 mmol, 1.4 equiv) in anhyd DMF (5 mL) was added dropwise. After complete addition, the ice bath was removed, and the reaction mixture was stirred at rt for 2 h. After this time, the reaction was carefully quenched with cold, deionized H<sub>2</sub>O (20 mL). The contents of the flask were transferred to a separatory funnel and diluted with EtOAc (30 mL). The layers were separated, and the aq layer was extracted with EtOAc (2 × 20 mL). The combined organic layers were washed with deionized H<sub>2</sub>O (60 mL), brine (100 mL), and dried (Na<sub>2</sub>SO<sub>4</sub>). The solvent was removed *in vacuo* by rotary evaporation to afford 1-bromo-3-(methoxymethoxy)benzene as a clear, colorless oil (1.51g, 87%). All data matched that reported in the literature.<sup>14</sup>

### *N,N*-Dibenzyl-4-bromobenzamide

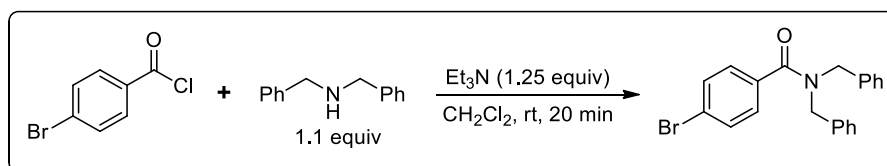

To a 150 mL round bottom flask equipped with a stirrer bar was added 4-bromobenzoyl chloride (2.20 g, 10.0 mmol, 1.00 equiv) followed by CH<sub>2</sub>Cl<sub>2</sub> (30 mL). The flask was sealed with a rubber septum and placed under an Ar atmosphere *via* an inlet needle. The flask was charged with Et<sub>3</sub>N (1.77 g, 2.44 mL, 17.5 mmol, 1.75 equiv) and was then cooled to 0 °C in an ice-water bath. After 5 min, Bn<sub>2</sub>NH (2.96 g, 15.0 mmol, 1.50 equiv) was added dropwise to the flask. The mixture was stirred for 20 min at 0 °C. After this time, 2 M aq HCl (50 mL) was added to the flask. The contents of the flask were transferred to a separatory funnel and diluted with CH<sub>2</sub>Cl<sub>2</sub> (30 mL). The layers were separated, and the aq layer was extracted with CH<sub>2</sub>Cl<sub>2</sub> (2 × 30 mL). The combined organic layers were washed with 2 M HCl (2 × 50

mL), brine (100 mL), and dried ( $\text{Na}_2\text{SO}_4$ ). The solvent was removed *in vacuo* by rotary evaporation to afford *N,N*-dibenzyl-4-bromobenzamide as an off-white solid (2.315 g, 91%). All data matched that reported in the literature.<sup>15</sup>

### *N*-(3-Bromophenyl)phthalimide, **S1**

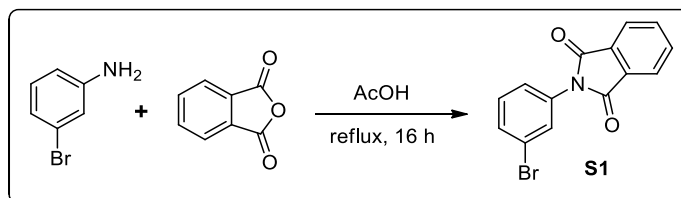

*N*-(3-Bromophenyl)phthalimide, **S1** was prepared *via* a modified literature procedure.<sup>16</sup> To a 100 mL round bottom flask equipped with a stirrer bar was added 3-bromoaniline (1.72 g, 10.0 mmol, 1 equiv) followed by AcOH (50 mL). The mixture was stirred for 2 min, and then phthalic anhydride (1.48 g, 10.0 mmol, 1 equiv) was added. The flask was equipped with a reflux condenser, and the reaction mixture was heated to reflux for 16 h. After this time, the reaction mixture was cooled to rt, and ice was added to the mixture, which caused the precipitation of a white powder. This solid was collected by vacuum filtration through a medium porosity fritted funnel and dried to yield *N*-(3-bromophenyl)phthalimide) as a white powder (2.65 g, 88 %) (mp = 162 – 163 °C).

**<sup>1</sup>H NMR** ( $\text{CDCl}_3$ , 500 MHz)  $\delta$  ppm 7.97 (dd,  $J$  = 5.3, 3.1 Hz, 2H), 7.81 (dd,  $J$  = 5.3, 3.1 Hz, 2H), 7.66 (s, 1H), 7.54 (d,  $J$  = 7.8 Hz, 1H), 7.36 - 7.45 (m, 2H). **<sup>13</sup>C NMR** ( $\text{CDCl}_3$ , 125 MHz)  $\delta$  ppm 167.0, 134.8, 133.1, 131.7, 131.3, 130.4, 129.7, 125.2, 124.1, 122.6. **FT-IR** ( $\text{cm}^{-1}$ , neat, ATR) 3012 (w), 1711 (vs), 1477 (m), 1376 (s), 1078 (m), 862 (m). **HRMS** (EI) calcd for  $\text{C}_{14}\text{H}_8\text{BrNO}_2$  [ $\text{M}$ ]<sup>+</sup>: 300.9738, found: 300.9741.

### *tert*-Butyl Acetyl(4-bromophenyl)carbamate, **S2**

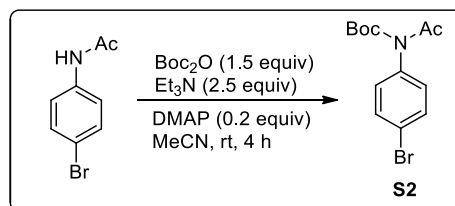

To a 150 mL round bottom flask equipped with a stirrer bar was added 4-bromoacetanilide (2.14 g, 10.0 mmol, 1.00 equiv) and DMAP (0.244 g, 2.00 mmol, 0.2 equiv). The flask was sealed with a rubber septum and placed under an Ar atmosphere *via* an inlet needle. The flask was charged with MeCN (35

mL) and Et<sub>3</sub>N (3.5 mL, 25 mmol, 2.5 equiv). After stirring for 2 min, Boc<sub>2</sub>O (3.27 g, 15.0 mmol, 1.5 equiv) was added *via* a syringe. The mixture was stirred for 4 h at rt. After this time, 1 M aq HCl (50 mL) was added to the flask. The contents of the flask were transferred to a separatory funnel and diluted with EtOAc (60 mL). The layers were separated, and the aq layer was extracted with EtOAc (2 × 30 mL). The combined organic layers were washed with 2 M HCl (2 × 50 mL), brine (100 mL), and dried (Na<sub>2</sub>SO<sub>4</sub>). The solvent was removed *in vacuo* by rotary evaporation to afford the crude Boc aniline. Further purification was accomplished by recrystallization from MeOH to afford *tert*-butyl acetyl(4-bromophenyl)carbamate, **S2**, as a white solid (2.307 g, 73%) (mp = 122-123 °C).

**<sup>1</sup>H NMR** (CDCl<sub>3</sub>, 500 MHz) δ ppm 7.52 (d, *J* = 8.4 Hz, 2H), 6.96 (d, *J* = 8.4 Hz, 2H), 2.59 (s, 3H), 1.39 (s, 9H). **<sup>13</sup>C NMR** (CDCl<sub>3</sub>, 125 MHz) δ ppm 173.0, 152.5, 138.1, 132.3, 130.1, 121.8, 83.8, 278.0, 26.6. **FT-IR** (cm<sup>-1</sup>, neat, ATR) 2985 (vw), 1737 (s), 1704 (vs), 1367 (m), 1271 (s), 1257 (s), 845 (m). **HRMS** (EI) calcd for C<sub>8</sub>H<sub>7</sub>BrNO [M-Boc]<sup>+</sup>: 212.9789, found: 212.9769.

#### 4-((4-Bromophenyl)sulfonyl)morpholine

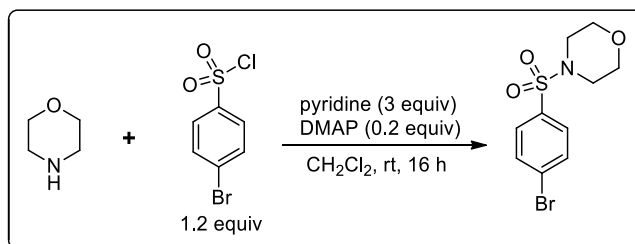

To a 150 mL round bottom flask equipped with a stirrer bar was added 4-bromobenzenesulfonyl chloride (6.13 g, 24.0 mmol, 1.2 equiv) and DMAP (0.489 g, 4.80 mmol, 0.2 equiv). The flask was sealed with a rubber septum and placed under an Ar atmosphere *via* an inlet needle. The flask was charged with CH<sub>2</sub>Cl<sub>2</sub> (67 mL) and pyridine (4.83 mL, 60.0 mmol, 3 equiv) followed by morpholine (1.73 mL, 20.0 mmol, 1 equiv). The mixture was stirred overnight at rt. After this time, 1 M aq HCl (50 mL) was added to the flask. The contents of the flask were transferred to a separatory funnel and diluted with CH<sub>2</sub>Cl<sub>2</sub> (25 mL). The layers were separated, and the aq layer was extracted with CH<sub>2</sub>Cl<sub>2</sub> (2 × 30 mL). The combined organic layers were washed with 1 M HCl (2 × 50 mL), deionized H<sub>2</sub>O (100 mL), brine (100 mL), and dried (Na<sub>2</sub>SO<sub>4</sub>). The solvent was removed *in vacuo* by rotary evaporation to afford the sulfonamide. Further purification was accomplished by recrystallization from CH<sub>2</sub>Cl<sub>2</sub> at -20 °C to afford 4-((4-bromophenyl)sulfonyl)morpholine as a white crystalline solid (4.96 g, 81%) (mp = 149-150 °C). All data matched that reported in the literature.<sup>17</sup>



### 4-Bromo-*N*-phenylbenzenesulfonamide

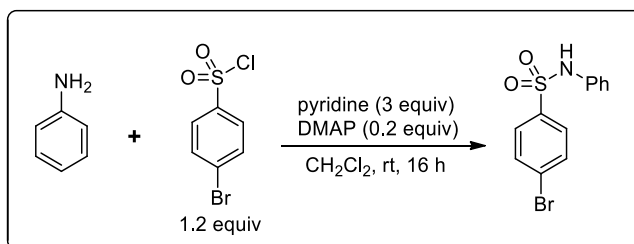

To a 150 mL round bottom flask equipped with a stirrer bar was added 4-bromobenzenesulfonyl chloride (1.66 g, 6.50 mmol, 1.3 equiv) and DMAP (0.122 g, 1.00 mmol, 0.2 equiv). The flask was sealed with a rubber septum and placed under an Ar atmosphere *via* an inlet needle. The flask was charged with CH<sub>2</sub>Cl<sub>2</sub> (17 mL) and pyridine (1.21 mL, 15.0 mmol, 3 equiv) followed by aniline (0.456 mL, 5.00 mmol, 1 equiv). The mixture was stirred overnight at rt. After this time, 1 M aq HCl (50 mL) was added to the flask. The contents of the flask were transferred to a separatory funnel and diluted with CH<sub>2</sub>Cl<sub>2</sub> (25 mL). The layers were separated, and the aq layer was extracted with CH<sub>2</sub>Cl<sub>2</sub> (2 × 30 mL). The combined organic layers were washed with 1 M HCl (2 × 50 mL), deionized H<sub>2</sub>O (100 mL), brine (100 mL), and dried (Na<sub>2</sub>SO<sub>4</sub>). The solvent was removed *in vacuo* by rotary evaporation to afford the sulfonamide. Further purification was accomplished by recrystallization from MeOH to afford 4-bromo-*N*-phenylbenzenesulfonamide as a white crystalline solid (1.34 g, 86%) (mp = 114-115 °C). All data matched that reported in the literature.<sup>18</sup>

### 4-Bromo-2-(3-chlorophenoxy)benzonitrile, S3

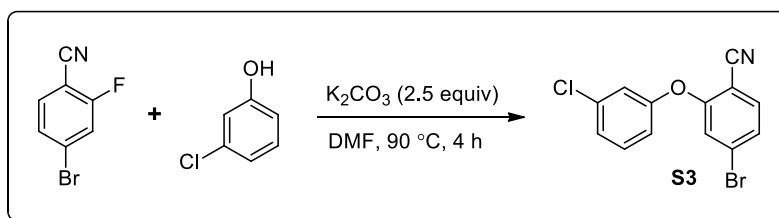

To a 100 mL round bottom flask equipped with a stir bar was added 4-bromo-2-fluorobenzonitrile (0.643 g, 3.21 mmol, 1.0 equiv) and potassium carbonate (1.11 g, 8.03 mmol, 2.5 equiv). The flask was capped with a septum and placed under an Ar atmosphere *via* an inlet needle. Anhydrous DMF (15 mL) was added to the flask via syringe followed by 3-chlorophenol (0.475 g, 3.69 mmol, 1.15 equiv). The reaction was then heated to 90 °C for 4 hours. After cooling to room temperature the reaction was quenched with saturated aq NH<sub>4</sub>Cl (30 mL) and the mixture was extracted with diethyl ether (3 X 25 mL). The combined organic extracts were washed with 2 M aq NaOH (2 × 25 mL). The organic layer was dried (Na<sub>2</sub>SO<sub>4</sub>), filtered, and concentrated *via* rotary evaporation. Further purification was accomplished by SiO<sub>2</sub> column

chromatography (hexanes to 93:7 hexanes/EtOAc) to yield the desired compound **S3** as a white solid (0.960 g, 97%) (mp = 88-90 °C)

**<sup>1</sup>H NMR** (CDCl<sub>3</sub>, 500 MHz) δ ppm 7.53 (d, *J* = 8.2 Hz, 1H), 7.37 (t, *J* = 8.2 Hz, 1H), 7.33 (dd, *J* = 8.3, 1.5 Hz, 1H), 7.28 - 7.23 (m, 1H), 7.11 (t, *J* = 2.0 Hz, 1H), 7.02 (d, *J* = 1.4 Hz, 1H), 7.00 (dd, *J* = 8.2, 2.2 Hz, 1H). **<sup>13</sup>C NMR** (CDCl<sub>3</sub>, 125 MHz) δ ppm 159.7, 155.4, 136.0, 135.0, 131.4, 129.0, 127.2, 126.2, 120.9, 120.9, 118.5, 115.3, 103.3. **FT-IR** (cm<sup>-1</sup>, neat, ATR) 3092 (vw), 2232 (w), 1584 (m), 1471 (s), 1400 (m), 1234 (s), 923 (m), 853 (m). **HRMS** (EI) calcd for C<sub>13</sub>H<sub>7</sub>BrClNO [M<sup>+</sup>]: 306.9400, found: 306.9396.

### Synthesis of Bis(catecholato)diboron

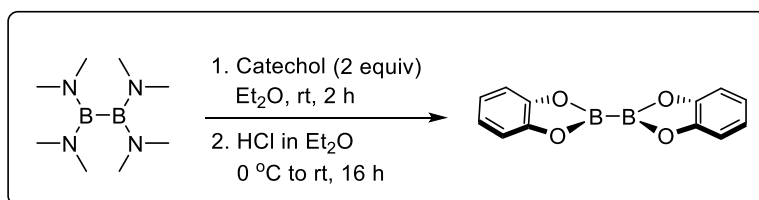

Bis(catecholato)diboron was prepared according to a modified literature procedure.<sup>19</sup> A 500 mL, three-necked round bottom flask was equipped with large stirrer bar, two rubber septa, and an addition funnel capped with a rubber septum. The flask was equipped with an inlet needle, and the flask was evacuated and backfilled with Ar three times. The addition funnel was sealed off from the flask, equipped with an inlet needle, and backfilled with Ar. The funnel was charged with 200 mL of Et<sub>2</sub>O. The Et<sub>2</sub>O was degassed for 5 min, then added to the flask. Tetrakis(dimethylamido)diboron (6.00 g, 6.48 mL, 30.3 mmol, 1 equiv) was added *via* a syringe. The boron soln was allowed to drain into the flask, and then the addition funnel was sealed off from the flask. The funnel was then charged with a degassed soln of catechol (6.67 g, 60.6 mmol, 2.0 equiv) in anhyd Et<sub>2</sub>O (50 mL). This soln was then added to the flask dropwise over 15 min. The soln became a thick, white slurry. After stirring for 2 h at rt, the reaction mixture was cooled to 0 °C in an ice-water bath, and the septum was removed from the addition funnel. To the addition funnel was added a degassed 1 M solution of HCl in Et<sub>2</sub>O (150 mL, 151.5 mmol, 5 equiv), and this was added to the chilled flask, dropwise, over 20 min. The reaction mixture was allowed to warm to rt overnight. The reaction mixture was concentrated *in vacuo via* rotary evaporation to yield a crude, white solid. The solid was taken up in boiling toluene and filtered through a coarse fritted glass funnel to remove the diethylammonium chloride by-product. This was repeated two times. The filtrate was concentrated *via* rotary evaporation, and the crude solid was washed with cold MeCN (2 × 20 mL) to afford a fluffy white solid (5.1 g, 71%). All data matched that reported in the literature.<sup>20</sup>

## Synthesis of Organotrifluoroborates

### General Procedure A1: Preparation of *N*-Hydroxyphthalimide Esters

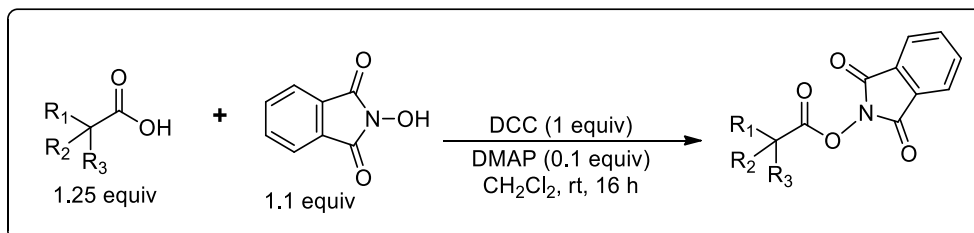

To an appropriately-sized round bottom flask equipped with a stirrer bar was added *N*-hydroxyphthalimide (1.1 equiv), DMAP (0.1 equiv), and the requisite carboxylic acid (1.25 equiv). The flask was sealed with a rubber septum and placed under an Ar atmosphere *via* an inlet needle. The flask was charged with CH<sub>2</sub>Cl<sub>2</sub> (0.3 M), and the flask was cooled to 0 °C via an ice water bath. After 5 min, a soln of DCC (1 equiv) in CH<sub>2</sub>Cl<sub>2</sub> (2 M) was added to the flask over 2 min. After complete addition, the ice-bath was removed, and the mixture was stirred overnight at rt. A voluminous precipitate was observed. After this time, the reaction mixture was filtered through a medium porosity fritted funnel (to remove the urea by-product). The filtrate was transferred to a separatory funnel and washed with satd aq Na<sub>2</sub>CO<sub>3</sub>, and the aq layer was extracted twice with CH<sub>2</sub>Cl<sub>2</sub>. The organic layer was washed with deionized H<sub>2</sub>O, brine, and dried (Na<sub>2</sub>SO<sub>4</sub>). The solvent was removed *in vacuo* by rotary evaporation. Further purification was accomplished by passing the crude material over a pad of silica, eluting with a proper ratio of hexane/EtOAc.

**1,3-Dioxoisindolin-2-yl 5-(2,5-Dimethylphenoxy)-2,2-dimethylpentanoate, S4** (2.168 g, 47%) was

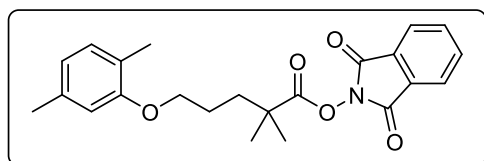

prepared from 5-(2,5-dimethylphenoxy)-2,2-dimethylpentanoic acid (3.476 g, 13.89 mmol) according to **General Procedure A1**. The desired compound **S4** was obtained as a powdery white solid (mp = 74-75 °C). **<sup>1</sup>H NMR** (CDCl<sub>3</sub>, 500

MHz) δ ppm 7.89 (dd, *J* = 5.4, 3.1 Hz, 2H), 7.79 (dd, *J* = 5.5, 3.2 Hz, 2H), 7.00 (d, *J* = 7.3 Hz, 1H), 6.69 - 6.63 (m, 2H), 4.01 (t, *J* = 4.7 Hz, 2H), 2.33 - 2.29 (m, 3H), 2.21 - 2.17 (m, 3H), 1.98 - 1.92 (m, 4H), 1.45 (s, 6H). **<sup>13</sup>C NMR** (CDCl<sub>3</sub>, 125 MHz) δ ppm 157.3, 136.5, 130.4, 123.8, 120.6, 112.2, 83.1, 68.8, 37.4, 26.6, 25.0, 24.8, 21.5, 15.9. **FT-IR** (cm<sup>-1</sup>, neat, ATR) 3001 (vw), 2950 (w), 1742 (vs), 1146 (s), 696 (m). **HRMS** (ESI) calcd for C<sub>23</sub>H<sub>25</sub>NO<sub>5</sub> [M]<sup>+</sup>: 395.1733, found: 395.1740.

**1,3-Dioxoisindolin-2-yl 3-Isopropyl-1-methylcyclopentane Carboxylate, S5** (3.004 g, 97%) was

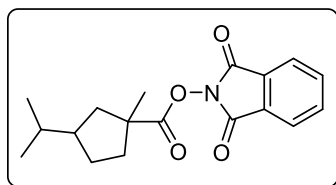

prepared from 3-isopropyl-1-methylcyclopentane-1-carboxylic acid (2.063 g, 10.00 mmol) according to **General Procedure A1**. The desired compound **S5** was obtained as a powdery white solid (mp = 74-75 °C). **<sup>1</sup>H NMR** (CDCl<sub>3</sub>, 500 MHz) δ ppm 7.88 (dd, *J* = 5.5, 3.1 Hz, 2 H), 7.78 (dd,

*J* = 5.3, 3.2 Hz, 2 H), 2.45 (ddd, *J* = 13.0, 9.1, 3.5 Hz, 1 H), 2.05 - 1.96 (m, 1 H), 1.96 - 1.85 (m, 2 H), 1.81 - 1.70 (m, 1 H), 1.69 - 1.60 (m, 1 H), 1.51 - 1.41 (m, 5 H), 0.94 - 0.86 (m, 6 H). **<sup>13</sup>C NMR** (CDCl<sub>3</sub>, 125 MHz) δ 174.8, 162.3, 134.8, 129.2, 124.0, 48.0, 47.1, 42.8, 38.1, 33.4, 30.7, 25.5, 21.7, 21.6 ppm.

**FT-IR** (cm<sup>-1</sup>, neat, ATR) 2958 (w), 1741 (vs), 696 (m). **HRMS** (EI) calcd for C<sub>9</sub>H<sub>17</sub> [M - CO<sub>2</sub>phthalimide]: 125.1325, found: 125.1243 and C<sub>8</sub>H<sub>5</sub>NO<sub>2</sub> [phthalimide]: 147.0320, found: 147.0320.

### Synthesis of Pinacolboronate Esters from NHPI Esters

#### General Procedure A2: Synthesis of 3° Bpins via Decarboxylative Borylation of NHPI Esters

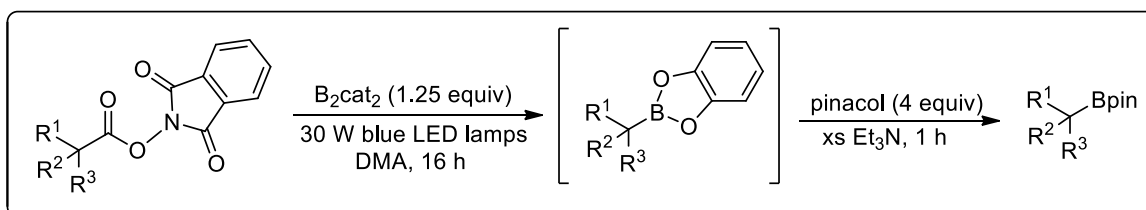

Pinacolboronate esters were prepared from NHPI redox-active esters *via* a modified literature procedure.<sup>21</sup> To an appropriately sized reaction vial equipped with a stirrer bar was added the NHPI ester (1 equiv) and B<sub>2</sub>cat<sub>2</sub> (1.25 equiv). The reaction vessel was sealed with a cap containing a TFE-lined silicone septum and placed under an inert atmosphere of argon. Thoroughly degassed DMA (0.1 M) was added, and the headspace of the vial was purged with Ar for 30 sec. The vial was sealed with Parafilm<sup>®</sup> and irradiated overnight with Kessil H150-Blue lamps using a previously described photoreactor.<sup>22</sup> After this time, the vial was removed from the reactor and was charged with a soln of pinacol (4 equiv) in Et<sub>3</sub>N (25 equiv) and then stirred for 1 h. The contents of the vial were transferred to a separatory funnel and diluted with EtOAc and a 1:1 H<sub>2</sub>O/satd NH<sub>4</sub>Cl soln. The layers were separated, and the aq layer was extracted twice with EtOAc. The organic layer was washed with H<sub>2</sub>O, brine, and dried (Na<sub>2</sub>SO<sub>4</sub>). The solvent was removed *in vacuo* by rotary evaporation to give the crude ester. Further purification was accomplished by rapid silica gel column chromatography to yield the desired boronic ester.

## 2-(5-(2,5-Dimethylphenoxy)-2-methylpentan-2-yl)-4,4,5,5-tetramethyl-1,3,2-dioxaborolane, **S6**

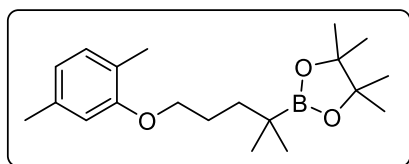

(combined yield: 0.822 g, 50%) was prepared from **S4** (0.198 g, 0.500 mmol) according to **General Procedure A2**. The reaction was carried out 10 times in parallel (5.00 mmol total). After 24 h of irradiation, the reactions were combined and converted into the corresponding pinacol boronate ester and purified together. The desired compound **S6** was obtained as a waxy, salmon-colored solid (mp = 57-59 °C). **<sup>1</sup>H NMR** (CDCl<sub>3</sub>, 500 MHz) δ ppm 6.99 (d, *J* = 7.3 Hz, 1H), 6.64 (d, *J* = 7.5 Hz, 1H), 6.62 (s, 1H), 3.91 (t, *J* = 6.6 Hz, 2H), 2.30 (s, 3H), 2.18 (s, 3H), 1.74 (br s, 2H), 1.46 - 1.40 (m, 2H), 1.23 (s, 12H), 0.96 (s, 6H). **<sup>13</sup>C NMR** (CDCl<sub>3</sub>, 125 MHz) δ ppm 157.3, 136.5, 130.4, 123.8, 120.6, 112.2, 83.1, 68.8, 37.4, 26.6, 25.0, 24.8, 21.5, 15.9. **<sup>11</sup>B NMR** (CDCl<sub>3</sub>, 128.4 MHz) δ 34.3. **FT-IR** (cm<sup>-1</sup>, neat, ATR) 2937 (w), 2863 (w), 1308 (m), 1265 (m), 1140 (s). **HRMS** (EI) calcd for C<sub>20</sub>H<sub>33</sub>BO<sub>3</sub> [M]<sup>+</sup>: 332.2523, found: 332.2535.

## 2-(3-Isopropyl-1-methylcyclopentyl)-4,4,5,5-tetramethyl-1,3,2-dioxaborolane, **S7** (0.290 g, 23%) was

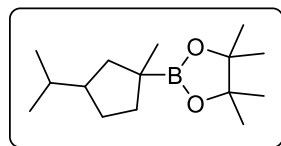

prepared from **S5** (1.577 g, 5.00 mmol) according to **General Procedure A2**.

The desired compound **S7** was obtained as a pink-tinted oil. **<sup>1</sup>H NMR** (CDCl<sub>3</sub>, 500 MHz) δ ppm 2.05 - 1.75 (m, 2H), 1.75 - 1.60 (m, 1H), 1.58 - 1.29 (m, 3H), 1.28 - 1.13 (m, 14H), 0.99 (d, *J* = 14.0 Hz, 3H), 0.87 (dd, *J* = 6.0, 4.6 Hz, 6H). **<sup>13</sup>C NMR** (CDCl<sub>3</sub>, 125 MHz) δ ppm 83.0, 82.9, 48.7, 46.9, 43.0, 41.6, 36.9, 36.8, 34.3, 33.9, 31.3, 30.2, 24.8, 24.8, 24.3, 22.0, 21.9, 21.8, 21.7. **<sup>11</sup>B NMR** (CDCl<sub>3</sub>, 128.4 MHz) δ 34.7. **FT-IR** (cm<sup>-1</sup>, neat, ATR) 2973 (m), 2945 (m), 1433 (w), 1364 (m), 1318 (m), 1204 (m). **HRMS** (EI) calcd for C<sub>9</sub>H<sub>17</sub> [M - Bpin; C<sub>9</sub>H<sub>17</sub>]: 125.1325, found: 125.1337.

### General Procedure A3: Conversion of Pinacolboronate Esters to Organotrifluoroborates

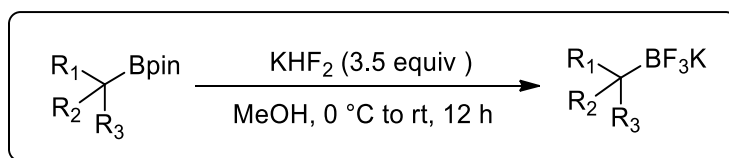

To an appropriately sized round bottom flask equipped with a stirrer bar was added the pinacolboronate ester (1 equiv). MeOH was added to the flask, and the soln was cooled to 0 °C in an ice-water bath. After cooling for 5 min, aq KHF<sub>2</sub> (3.5 equiv, 4.5 M) was added dropwise *via* an addition funnel. After complete addition, the ice-water bath was removed, and the reaction was allowed to stir at rt overnight. After this time, the solvent was removed *in vacuo via* rotary evaporation. The resulting crude solid was taken up in

boiling acetone (three to five portions) and filtered through a fritted glass funnel to remove inorganic salts. The filtrate was concentrated *via* rotary evaporation, and the crude solid was washed with a 1:1 mixture of pentane/CH<sub>2</sub>Cl<sub>2</sub> then CH<sub>2</sub>Cl<sub>2</sub> to afford the pure organotrifluoroborate.

**Potassium (5-(2,5-Dimethylphenoxy)-2-methylpentan-2-yl)trifluoroborate, S8** (0.951 g, 93%) was

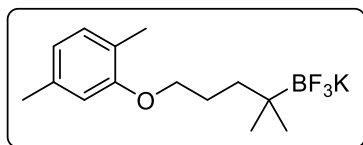

prepared from **S6** according to **General Procedure A3**. The desired compound **S8** was obtained as a crystalline, white solid (mp = 82-83 °C). <sup>1</sup>H NMR (CDCl<sub>3</sub>, 500 MHz) δ ppm 6.94 (d, *J* = 7.5 Hz, 1H), 6.70 (s, 1H), 6.58 (d, *J* = 7.5 Hz, 1H), 3.86 (t, *J* = 7.1 Hz, 2H), 2.26 (s, 3H), 2.12 (s, 3H), 1.88 - 1.78 (m, 2H), 1.30 - 1.23 (m, 2H), 0.73 (s, 6H). <sup>13</sup>C NMR (CDCl<sub>3</sub>, 125 MHz) δ ppm 157.3, 136.5, 130.4, 123.8, 120.6, 112.2, 83.1, 68.8, 37.4, 26.6, 25.0, 24.8, 21.5, 15.9. <sup>19</sup>F NMR (CDCl<sub>3</sub>, 471 MHz) δ - 151.00 (s, 3F). <sup>11</sup>B NMR (CDCl<sub>3</sub>, 128.4 MHz) δ 6.9. FT-IR (cm<sup>-1</sup>, neat, ATR) 2948 (w), 2861 (vw), 1509 (m), 1263 (m), 1025 (s), 948 (m). HRMS (ESI) calcd for C<sub>14</sub>H<sub>21</sub>BF<sub>3</sub>O [M-K<sup>+</sup>]<sup>+</sup>: 277.1630, found: 273.1657.

**Potassium (3-Isopropyl-1-methylcyclopentyl)trifluoroborate, S9** (0.290 g, 66%) was prepared from

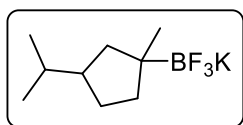

**S7** (0.480 g, 1.90 mmol) according to **General Procedure A3**. The desired compound **S9** was obtained as a powdery white solid (mp = 234-235 °C). <sup>1</sup>H NMR (CDCl<sub>3</sub>, 500 MHz) δ ) δ ppm 1.94 (dd, *J* = 11.9, 7.9 Hz) and 0.54 (t, *J* = 10.8 Hz, 1H total), 1.69 (m, 2H), 1.53 (dt, *J* = 17.0, 8.2 Hz, 1H), 1.24 (m, 2H), 1.12 (m, 1H), 0.97 (m, 1H), 0.85 (m, 6H), 0.78 (d, *J* = 7.6 Hz, 3H) ppm. <sup>13</sup>C NMR (CDCl<sub>3</sub>, 125 MHz) δ ppm 50.3, 48.2, 43.9, 42.6, 37.4, 37.2, 35.7, 35.0, 32.4, 31.9, 27.4, 26.0, 22.5, 22.4. <sup>19</sup>F NMR (CDCl<sub>3</sub>, 471 MHz) δ - 151.93 (s, 3F). <sup>11</sup>B NMR (CDCl<sub>3</sub>, 128.4 MHz) δ 5.6. FT-IR (cm<sup>-1</sup>, neat, ATR) 2951 (m), 1465 (w), 1049 (w), 938 (s). HRMS (ESI) calcd for C<sub>9</sub>H<sub>17</sub>BF<sub>3</sub> [M-K<sup>+</sup>]<sup>+</sup>: 193.1375, found: 193.1369.

**Potassium (4-Pentylbicyclo[2.2.2]octan-1-yl)trifluoroborate, S10** (0.730 g, 88%) was prepared from

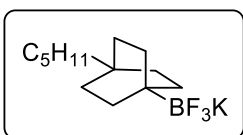

the corresponding NHPI ester (0.890 g, 2.91 mmol) according to **General Procedure A3**. The desired compound **S10** was obtained as a powdery white solid (mp = 255-257 °C). <sup>1</sup>H NMR (acetone-d<sub>6</sub>, 500 MHz) δ ppm 1.48 - 1.40 (m, 6H), 1.28 - 1.37 (m, 2H), 1.26 - 1.15 (m, 10H), 1.03 - 0.96 (m, 2H), 0.90 (t, *J* = 7.2 Hz, 3H). <sup>13</sup>C NMR (acetone-d<sub>6</sub>, 125 MHz) δ ppm 43.9, 33.9, 32.9, 31.2, 28.4, 24.0, 23.4, 14.4, 0.5. <sup>19</sup>F NMR (CDCl<sub>3</sub>, 471 MHz) δ - 152.67 (s, 3F). <sup>11</sup>B NMR (CDCl<sub>3</sub>, 128.4 MHz) δ 4.6. FT-IR (cm<sup>-1</sup>, neat, ATR) 2923 (m), 2854 (m), 1202 (m), 908 (s). HRMS (ESI) calcd for C<sub>13</sub>H<sub>23</sub>BF<sub>3</sub> [M-K<sup>+</sup>]<sup>+</sup>: 247.1845, found: 247.1866.

**Potassium (1-Methylcyclohexyl)trifluoroborate, S11** (0.330 g, 39%) was prepared from the corresponding NHPI ester (0.935 g, 4.17 mmol) according to **General Procedure A2**. The desired compound **S11** was obtained as a powdery white solid (mp = 195-197 °C). **<sup>1</sup>H NMR** (acetone-*d*<sub>6</sub>, 500 MHz) δ ppm 1.58 - 1.50 (m, 2H), 1.49 - 1.37 (m, 5H), 1.32 - 1.23 (m, 1H), 1.09 - 1.02 (m, 2H), 0.76 (s, 3H). **<sup>13</sup>C NMR** (acetone-*d*<sub>6</sub>, 125 MHz) δ ppm 35.6, 28.6, 23.3, 22.9, 22.8, 22.7. **<sup>19</sup>F NMR** (CDCl<sub>3</sub>, 471 MHz) δ - 151.80 (s, 3F). **<sup>11</sup>B NMR** (CDCl<sub>3</sub>, 128.4 MHz) δ 6.4. **FT-IR** (cm<sup>-1</sup>, neat, ATR) 3657 (m), 3541 (w), 2919 (m), 949 (s), 921 (s), 871 (m). **HRMS** (ESI) calcd for C<sub>7</sub>H<sub>13</sub>BF<sub>3</sub> [M-K<sup>+</sup>]<sup>+</sup>: 165.1062, found: 165.1078.

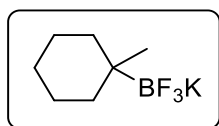

## Synthesis of Pinacolboronate Esters from $\alpha,\beta$ -Unsaturated Carbonyl Compounds

### General Procedure B: Two-Step/One-Pot Borylation/BF<sub>3</sub>K Synthesis from Enones

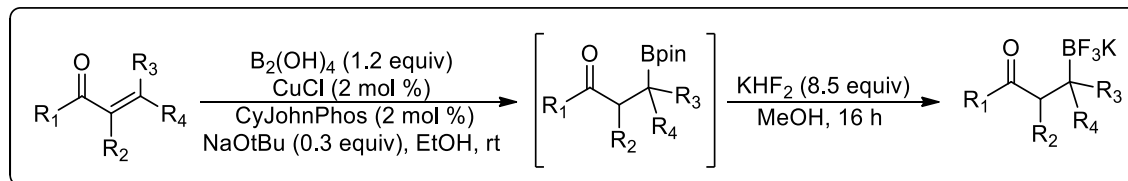

The following protocol is a modified literature procedure.<sup>23</sup> In an argon filled glovebox, CuCl (2 mol %), NaOt-Bu (30 mol %), CyJohnPhos (2 mol %), and B<sub>2</sub>(OH)<sub>4</sub> (1.2 equiv) were added to the flask. The flask was sealed with a rubber septum and removed from the glovebox. Absolute EtOH (0.1 M) and the enone (1 equiv) were then added via a syringe. The reaction was allowed to stir at rt under Ar until the solution turned colorless (1–24 h), at which point the borylation was judged to be complete. The reaction mixture was filtered through a pad of Celite, and the pad was washed with EtOAc. The filtrate was concentrated *via* rotary evaporation, and the resultant crude Bpin was taken up in MeOH (0.1 M) and cooled to 0 °C in an ice-water bath. After 5 min, aqueous KHF<sub>2</sub> (8.5 equiv, 4.5 M) was added dropwise *via* an addition funnel. After complete addition, the ice bath was removed, and the reaction was allowed to stir overnight. After this time, the crude reaction mixture was concentrated *via* rotary evaporation. The crude solid was taken up in portions of boiling acetone and filtered through a coarse fritted glass funnel to remove inorganic byproducts. The filtrate was concentrated *via* rotary evaporation, and the crude solid was washed with a 1:1 mixture of pentane/CH<sub>2</sub>Cl<sub>2</sub> then CH<sub>2</sub>Cl<sub>2</sub> to afford pure organotrifluoroborate.

**Potassium (1-Methyl-3-oxocyclopentyl)trifluoroborate,<sup>24</sup> S12** (0.717 g, 70%) was prepared according to **General Procedure B**. All data matched that recorded in the literature.

**Potassium (2-Methyl-4-oxopentan-2-yl)trifluoroborate,<sup>23</sup> S13** (5.99 g, 83%) was prepared according to **General Procedure B**. All data matched that recorded in the literature.

**Potassium (2'-Oxo-[1,1'-bi(cyclopentan)]-1-yl)trifluoroborate, S14** (0.690 g, 54%) was prepared

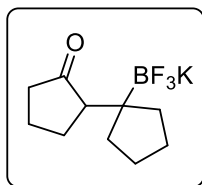

according to **General Procedure B**. The desired compound **S14** was obtained as a crystalline, white solid (mp = 170-171 °C). **<sup>1</sup>H NMR** (acetone-*d*<sub>6</sub>, 500 MHz) δ ppm 2.18 - 2.07 (m, 2H), 2.01 - 1.91 (m, 2H), 1.91 - 1.83 (m, 1H), 1.80 - 1.65 (m, 3H), 1.59 - 1.39 (m, 6H), 1.35 (dd, *J* = 11.5, 6.8 Hz, 1H). **<sup>13</sup>C NMR** (CDCl<sub>3</sub>, 125 MHz) δ 223.8, 56.8, 40.7, 35.9, 34.3, 29.3, 26.8, 26.1, 21.6 ppm. **<sup>19</sup>F NMR** (CDCl<sub>3</sub>, 471 MHz) δ - 143.10 (s, 3F). **<sup>11</sup>B NMR** (CDCl<sub>3</sub>, 128.4 MHz) δ 4.9, 4.4. **FT-IR** (cm<sup>-1</sup>, neat, ATR) 2951 (w), 1593 (m), 1364 (m), 1318 (m), 1204 (m), 1140 (vs) **HRMS** (ESI) calcd for C<sub>10</sub>H<sub>15</sub>BF<sub>3</sub>O [M-K<sup>+</sup>]: 219.1168, found: 219.1169.

**Potassium (2,6,6-Trimethyl-4-oxobicyclo[3.1.1]heptan-2-yl)trifluoroborate, S15** (1.340 g, 80%) was

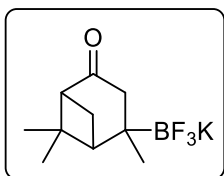

prepared according to **General Procedure B**. The desired compound **S15** was obtained as a crystalline, white solid (mp = 115-117 °C). **<sup>1</sup>H NMR** (acetone-*d*<sub>6</sub>, 500 MHz) δ ppm 2.75 and 2.71 (s, total 1H), 2.24 - 2.17 (m, 2H), 2.13 (d, *J* = 8.8 Hz, 1H), 2.09 - 2.05 (m, 1H), 1.81 and 1.77 (s, total 1H), 1.26 (s, 3H), 0.99 (s, 3H), 0.95 (s, 3H). **<sup>13</sup>C NMR** (CDCl<sub>3</sub>, 125 MHz) δ 216.9, 58.9, 51.0, 45.0, 42.4, 27.6, 26.3, 25.6, 23.5 ppm. **<sup>19</sup>F NMR** (CDCl<sub>3</sub>, 471 MHz) δ - 150.75 (s, 3F). **<sup>11</sup>B NMR** (CDCl<sub>3</sub>, 128.4 MHz) δ 4.8. **FT-IR** (cm<sup>-1</sup>, neat, ATR) 2937 (w), 1690 (m), 1025 (m), 982 (s), 950 (m). **HRMS** (ESI) calcd for C<sub>10</sub>H<sub>15</sub>BF<sub>3</sub>O [M-K<sup>+</sup>]: 219.1168, found: 219.1178.

### Alternative Procedure for Borylation of Enones

#### Potassium (1,3-Dimethyl-5-oxocyclohexyl)trifluoroborate, S16

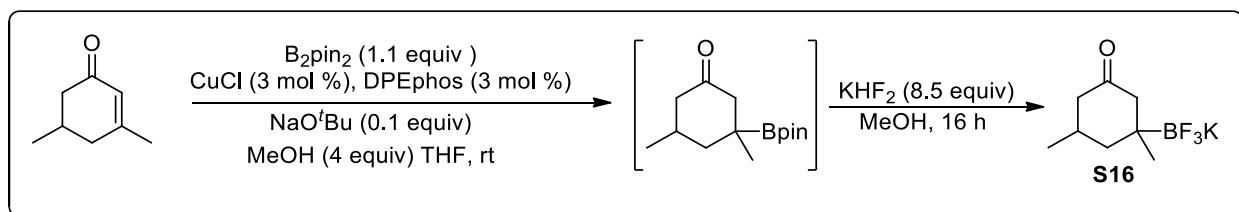

The following protocol is modified from a literature procedure.<sup>25</sup> To a 100 mL round bottom flask was added the enone (*if solid*) (1 equiv). The flask was carefully brought into the glovebox. CuCl (0.018 g, 0.18 mmol 0.03 equiv), DPEphos (0.097 g, 0.18 mmol, 0.03 equiv), and NaOt-Bu (0.058 g, 0.60 mmol, 0.01 equiv) were added to the flask. The flask was sealed with a rubber septum and removed from the glovebox. Anhyd THF (12 mL) was added to the flask, and the contents of the flask were stirred for ~30 min. After this time, the flask was charged with a soln of B<sub>2</sub>pin<sub>2</sub> in THF (4 mL). After 10 min, the flask was charged with the enone (0.745 g, 6.00 mmol, 1 equiv) followed by MeOH (0.769 g, 0.97 mL, 24.0



mmol, 4 equiv) added via syringe. The reaction was allowed to stir at rt under Ar until TLC analysis confirmed reaction completion. The reaction mixture was filtered through a pad of Celite, and the pad was washed Et<sub>2</sub>O (2 x 15 mL). The filtrate was concentrated via rotary evaporation, and the resultant crude Bpin was taken up in MeOH (0.1 M) and cooled to 0 °C in an ice-water bath. After 5 min, 4.5 M aq KHF<sub>2</sub> (11.3 mL, 0.051 mmol, 8.5 equiv) was added dropwise via an addition funnel. After complete addition, the ice bath was removed, and the reaction was allowed to stir overnight. After this time, the crude reaction mixture was concentrated via rotary evaporation. The crude solid was taken up in portions of boiling acetone (5 x 15 mL), and filtered through a coarse fritted glass funnel to remove inorganic byproducts. The filtrate was concentrated via rotary evaporation, and the crude solid was washed with a 1:1 mixture of pentane/CH<sub>2</sub>Cl<sub>2</sub> (50 mL) then CH<sub>2</sub>Cl<sub>2</sub> (20 mL) to afford pure organotrifluoroborate **S16** (0.141 g, 10% over two steps) as a crystalline, white solid (mp = 180-181 °C).

**<sup>1</sup>H NMR** (acetone-*d*<sub>6</sub>, 500 MHz) δ ppm 2.36 - 2.23 (m, 1H), 2.18 (d, *J* = 13.0 Hz, 1H), 1.86 (d, *J* = 12.2 Hz, 1H), 1.72 (t, *J* = 12.9 Hz, 1H), 1.56 (d, *J* = 13.0 Hz, 1H), 1.17 (s, 2H), 0.88 (d, *J* = 6.4 Hz, 3H), 0.78 (s, 3H). **<sup>13</sup>C NMR** (acetone-*d*<sub>6</sub>, 125 MHz) δ ppm 52.8, 50.2, 46.9, 31.4, 28.1, 25.3, 25.2, 23.7. **<sup>19</sup>F NMR** (acetone-*d*<sub>6</sub>, 471 MHz) δ -147.46 (s, 3F). **<sup>11</sup>B NMR** (acetone-*d*<sub>6</sub>, 128.4 MHz) δ 9.8, 9.4. **FT-IR** (cm<sup>-1</sup>, neat, ATR) 2954 (w), 2922 (vw), 2866 (vw), 2820 (vw), 1701 (s), 1016 (s), 958 (s). **HRMS** (ESI) calcd for C<sub>8</sub>H<sub>13</sub>BF<sub>3</sub>O [M-K<sup>+</sup>]<sup>+</sup>: 193.1012, found: 193.0993.

### Preparation of Alkene-containing Organotrifluoroborate, **S17**

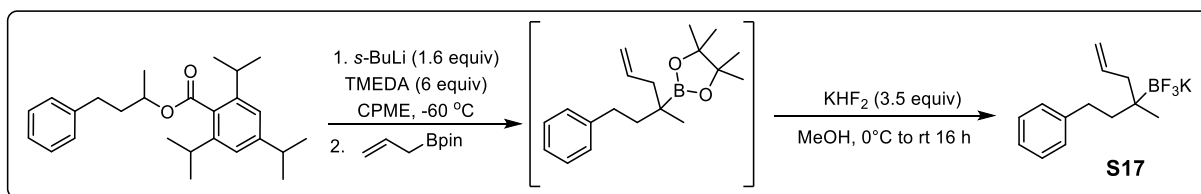

4,4,5,5-Tetramethyl-2-(3-methyl-1-phenylhex-5-en-3-yl)-1,3,2-dioxaborolane (**S17**) was prepared via known literature procedure.<sup>26</sup> After the lithiation/borylation reaction, the product was passed through a silica plug, eluting with Et<sub>2</sub>O. After removal of the solvent, the crude product was converted to the corresponding organotrifluoroborate using **General Procedure A3**. The desired compound was obtained as a white crystalline solid (mp = 156-158 °C) (0.401 g, 36% yield).

**<sup>1</sup>H NMR** (acetone-*d*<sub>6</sub>, 500 MHz) δ ppm 7.21 - 7.16 (m, 2H), 7.16 - 7.11 (m, 2H), 7.08 - 7.03 (m, 1H), 6.14 - 6.03 (m, 1H), 4.85 (dt, *J* = 17.1, 1.4 Hz, 1H), 4.79 (dd, *J* = 10.1, 2.9 Hz, 1H), 2.68 - 2.56 (m, 2H), 2.14 - 2.07 (m, 1H), 1.99 (dd, *J* = 13.4, 7.7 Hz, 1H), 1.42 (t, *J* = 8.7 Hz, 2H), 0.79 - 0.72 (m, 3H). **<sup>13</sup>C NMR** (acetone-*d*<sub>6</sub>, 125 MHz) δ ppm 147.2, 141.6, 129.2, 128.7, 125.4, 113.1, 43.8, 42.3, 32.6, 23.3. **<sup>19</sup>F**

**NMR** (acetone-*d*<sub>6</sub>, 471 MHz)  $\delta$  -148.42 (s, 3F). **<sup>11</sup>B NMR** (acetone-*d*<sub>6</sub>, 128.4 MHz)  $\delta$  9.8. **FT-IR** 3063 (w), 2944 (m), 1495 (w), 937 (vs) (cm<sup>-1</sup>, neat, ATR). **HRMS** (ESI) calcd for C<sub>13</sub>H<sub>17</sub>BF<sub>3</sub> [M-K<sup>+</sup>]<sup>+</sup>: 241.1375, found: 241.1377.

## Synthesis of Non-Commercial Giese Acceptors

### General Procedure C: Preparation of Acrylates

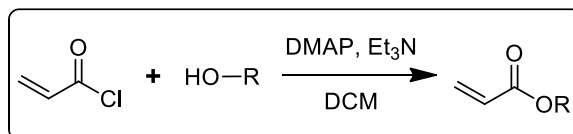

An appropriately sized flask equipped with a stir bar was charged with the desired alcohol (1 equiv), sealed with a rubber septum with inlet needle, and purged with Ar. The flask was then charged with anhydrous dichloromethane (0.3 M) and the flask was placed in an ice/water bath and allowed to cool to 0 °C. Acryloyl chloride (1.5 equiv) was added followed by DMAP (0.1 equiv). Triethylamine (2.5 equiv) was added dropwise and the solution darkened. The flask was stirred at 0 °C for five minutes after this addition and then the ice bath was removed. The contents of the flask were stirred at rt for two h. The reaction was then quenched with saturated aqueous NH<sub>4</sub>Cl and the layers were separated. The aqueous layer was extracted with dichloromethane and the combined organic layers were washed with brine, dried (Na<sub>2</sub>SO<sub>4</sub>), and concentrated *via* rotary evaporation. The resulting crude acylated product was purified via passage of the crude material over a pad of silica and/or vacuum distillation.

**Pent-4-en-1-yl Acrylate**,<sup>27</sup> **S18** (1.12 g, 81%) was prepared from 4-penten-1-ol (850 mg, 9.87 mmol)

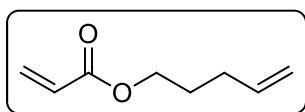

using **General Procedure C**. The desired acrylate **S18** was isolated as colorless liquid. **<sup>1</sup>H NMR** (CDCl<sub>3</sub>, 500 MHz)  $\delta$  ppm 6.40 (dd, *J*=17.4, 1.4 Hz, 1 H), 6.12 (dd, *J* = 17.3, 10.5 Hz, 1H), 5.75 - 5.89 (m, 2H), 5.04 (dq, *J* = 17.2, 1.6 Hz, 1H), 4.99 (dq, *J* = 10.1, 1.1 Hz, 1H), 4.17 (t, *J* = 6.6 Hz, 2H), 2.15 (q, *J* = 7.3 Hz, 2H), 1.78 (dt, *J* = 13.6, 6.9 Hz, 2H). **<sup>13</sup>C NMR** (CDCl<sub>3</sub>, 125 MHz)  $\delta$  ppm 166.5, 137.7, 130.8, 128.9, 115.6, 64.2, 30.3, 28.1. **FT-IR** (cm<sup>-1</sup>, neat, ATR) 2956 (w), 1723 (vs), 1407 (m), 1270 (s), 1184 (vs), 809 (s). **HRMS** (ESI) calcd for C<sub>8</sub>H<sub>12</sub>O<sub>2</sub> [M]<sup>+</sup>: 140.0837, found: 140.0835.

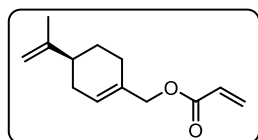

**(S)-(4-(Prop-1-en-2-yl)cyclohex-1-en-1-yl)methyl Acrylate**, **S19** (1.54 g, 75%) was prepared from (*S*)-perillyl alcohol (1.52 g, 10.0 mmol) using **General Procedure C**. The desired acrylate **S19** was isolated as a colorless liquid. **<sup>1</sup>H NMR** (CDCl<sub>3</sub>, 500 MHz)  $\delta$  ppm 6.42 (d, *J* = 17.2 Hz, 1H), 6.14 (dd, *J* = 17.3, 10.5 Hz, 1H), 5.83 (d, *J* =

10.5 Hz, 1H), 5.78 (br. s, 1H), 4.72 (d,  $J = 8.4$  Hz, 2H), 4.55 (s, 2H), 2.22 - 2.05 (m, 4H), 2.03 - 1.92 (m, 1H), 1.91 - 1.81 (m, 1H), 1.74 (s, 3H), 1.50 (tt,  $J = 12.0, 8.5$  Hz, 1H).  $^{13}\text{C NMR}$  ( $\text{CDCl}_3$ , 125 MHz)  $\delta$  ppm 166.4 (s), 149.9 (s), 132.8 (s), 131.0 (s), 128.8 (s), 126.1 (s), 109.1 (s), 68.8 (s), 41.1 (s), 30.7 (s), 27.6 (s), 26.7 (s), 21.0 (s). **FT-IR** ( $\text{cm}^{-1}$ , neat, ATR) 2920 (w), 1724 (vs), 1405 (m), 1180 (vs), 808 (m). **HRMS** (ESI) calcd for  $\text{C}_{13}\text{H}_{18}\text{O}_2$   $[\text{M}]^+$ : 206.1307, found: 206.1321.

**2-((1S,5R)-6,6-dimethylbicyclo[3.1.1]hept-2-en-2-yl)ethyl Acrylate, S20** (1.15 g, 87%) was prepared

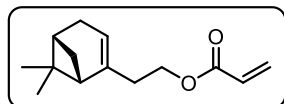

from 1-(S)-nopol (998 mg, 6.00 mmol) using **General Procedure C**. The desired acrylate **S20** was isolated as colorless oil.  $^1\text{H NMR}$  ( $\text{CDCl}_3$ , 500 MHz)  $\delta$  ppm 6.38 (d,  $J = 17.2$  Hz, 1H), 6.10 (dd,  $J = 17.3, 10.5$  Hz, 1H), 5.80 (d,  $J = 10.5$  Hz, 1H), 5.31 (s, 1H), 4.10 - 4.24 (m, 2H), 2.30 - 2.41 (m, 3H), 2.22 (q,  $J = 17.2$  Hz, 2H), 2.00 - 2.11 (m, 2H), 1.27 (s, 3H), 1.15 (d,  $J = 8.5$  Hz, 1H), 0.82 (s, 3H).  $^{13}\text{C NMR}$  ( $\text{CDCl}_3$ , 125 MHz)  $\delta$  ppm 166.5, 144.4, 130.7, 128.9, 119.2, 63.2, 46.0, 41.0, 38.3, 36.2, 31.9, 31.7, 26.6, 21.4. **FT-IR** ( $\text{cm}^{-1}$ , neat, ATR) 2915 (m), 1725 (vs), 1406 (m), 1183 (vs), 984 (m), 808 (m). **HRMS** (ESI) calcd for  $\text{C}_{14}\text{H}_{20}\text{O}_2$   $[\text{M}]^+$ : 220.1463 found: 220.1456.

**Cholesteryl Acrylate,<sup>28</sup> S21** (1.83 g, 69%) was prepared from cholesterol (2.32 g, 6.00 mmol) using

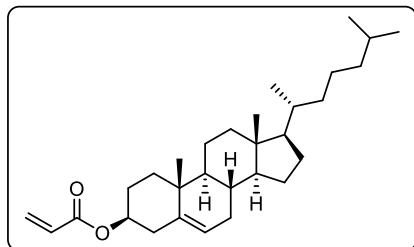

**General Procedure C**. The desired acrylate **S21** was isolated as white powdery solid (mp = 119-121 °C).  $^1\text{H NMR}$  ( $\text{CDCl}_3$ , 500 MHz)  $\delta$  ppm 6.38 (dd,  $J = 17.4, 1.4$  Hz, 1H), 6.10 (dd,  $J = 17.4, 10.4$  Hz, 1H), 5.79 (dd,  $J = 10.5, 1.4$  Hz, 1H), 5.39 (d,  $J = 4.7$  Hz, 1H), 4.62 - 4.75 (m, 1H), 2.36 (d,  $J = 7.5$  Hz, 2H), 1.78 - 2.08 (m, 5H), 1.41 - 1.69 (m, 7H), 1.21 - 1.40 (m, 4H), 1.05 - 1.21 (m, 7H), 1.03 (s, 3H), 0.90 - 1.02 (m, 6H), 0.87 (dd,  $J = 6.6, 2.1$  Hz, 6H), 0.68 (s, 3H).  $^{13}\text{C NMR}$  ( $\text{CDCl}_3$ , 125 MHz)  $\delta$  ppm 165.9, 139.9, 130.5, 129.4, 123.0, 74.4, 57.0, 56.5, 50.3, 42.6, 40.0, 39.8, 38.4, 37.3, 36.9, 36.5, 36.1, 32.2, 32.2, 28.5, 28.3, 28.1, 24.6, 24.1, 23.1, 22.9, 21.3, 19.6, 19.0, 12.2. **FT-IR** ( $\text{cm}^{-1}$ , neat, ATR) 2934 (w), 1719 (s), 1409 (m), 1203 (vs), 984 (m), 804 (m). **HRMS** (ESI) calcd for  $\text{C}_{30}\text{H}_{48}\text{O}_2$   $[\text{M}]^+$ : 440.3654, found: 440.3650.

**(R)-6-Methyl-2-((S)-4-methylcyclohex-3-en-1-yl)hept-5-en-2-yl Acrylate, S22** (890 mg, 32%) was

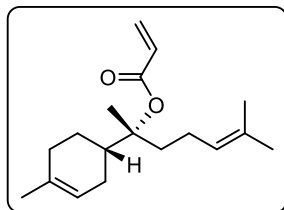

prepared from (-)- $\alpha$ -Bisabolol (2.250 g, 10.12 mmol) using **General Procedure C** with the following modifications: 1)  $\text{CHCl}_3$  was used in place of dichloromethane as the solvent; 2) The reaction was heated to 55 °C for 16 hrs. The desired acrylate **S22** was isolated as a yellow-tinted, viscous oil.  $^1\text{H NMR}$

(CDCl<sub>3</sub>, 500 MHz)  $\delta$  ppm 6.29 (dd,  $J = 17.4, 1.5$  Hz, 1H), 6.05 (dd,  $J = 17.3, 10.3$  Hz, 1H), 5.73 (dd,  $J = 10.4, 1.5$  Hz, 1H), 5.32 - 5.40 (m, 1H), 5.04 - 5.14 (m, 1H), 2.25 (tdd,  $J = 11.7, 11.7, 5.0, 2.0$  Hz, 1H), 1.76 - 2.10 (m, 9H), 1.66 (s, 3H), 1.64 (s, 3H), 1.58 (s, 3H), 1.44 (s, 3H), 1.34 (qd,  $J = 11.9, 5.3$  Hz, 1H). **<sup>13</sup>C NMR** (CDCl<sub>3</sub>, 125 MHz)  $\delta$  ppm 165.6, 134.4, 131.9, 130.6, 129.6, 124.3, 120.5, 87.6, 40.8, 35.8, 31.2, 26.6, 26.0, 23.9, 23.6, 22.3, 20.8, 17.8. **FT-IR** (cm<sup>-1</sup>, neat, ATR) 2926 (w), 1719 (vs), 1401 (m), 1203 (vs), 1046 (m), 809 (m). **HRMS** (ESI) calcd for C<sub>15</sub>H<sub>24</sub> [M - CH<sub>2</sub>=CHCO<sub>2</sub>H]<sup>+</sup>: 204.1878, found: 204.1866.

## Optimization and Control Studies

**General Optimization Procedure A:** To a 4 mL reaction vial equipped with a stirrer bar was added 1-bromo-4-chlorobenzene (**1**) (19.1 mg, 0.1 mmol, 1 equiv), <sup>t</sup>BuBF<sub>3</sub>K (**2**) (24.6 mg, 0.15 mmol, 1.5 equiv), the appropriate amount of K<sub>2</sub>HPO<sub>4</sub> (1 or 2 equiv), the appropriate photocatalyst (0.002 mmol, 0.02 equiv for organometallic complexes or 0.005 mmol, 0.05 equiv for organic dyes), and anhyd Ni(bpy)Br<sub>2</sub> (0.005 mmol, 0.05 equiv). The vial was sealed with a cap containing a TFE-lined silicone septa and was evacuated and purged with argon three times via an inlet needle. The vial was then charged with the vinyl boronate (**3**) (20.6 mg, 0.12 mmol, 1.2 equiv) in anhyd, degassed THF (1 mL). After this, the cap was sealed with Parafilm<sup>®</sup>, and the vial was irradiated with blue LEDs for 16 h (470 nm, ~10 W, at a distance of ~4.5 cm). The temperature of the reaction was maintained at approximately 27 °C via a fan. After 16 h, an aliquot of a solution of 4,4'-di-*tert*-butylbiphenyl in MeCN with a known concentration (20 mol % relative to the aryl halide) was added to each vial. Reaction progress was evaluated by GCMS to determine product-to-internal standard ratio (P/IS). These ratios were determined by comparing the values of the corrected peak areas of the desired product against 4,4'-di-*tert*-butylbiphenyl or 2,6-dimethylnaphthalene.

**General Optimization Procedure B:** To a 4 mL reaction vial equipped with a stirrer bar was added the appropriate aryl halide (0.1 mmol, 1 equiv), <sup>t</sup>BuBF<sub>3</sub>K (**2**) (24.6 mg, 0.15 mmol, 1.5 equiv), the appropriate base (0.1 mmol, 1 equiv), the appropriate Ni source (0.005 mmol, 0.05 equiv), and [Ir{dF(CF<sub>3</sub>)<sub>2</sub>ppy}<sub>2</sub>(bpy)]PF<sub>6</sub> (2.0 mg, 0.002 mmol, 0.02 equiv). The reaction vessel was sealed with a cap containing a TFE-lined silicone septum, evacuated, and filled with argon three times. The vinyl boronate (**3**) and aryl bromides (if liquid) were dissolved in degassed THF and added to the reaction mixture. The vial was further sealed with Parafilm<sup>®</sup> and irradiated with blue LEDs (470 nm, ~10 W, at a distance of ~4.5 cm) for 16 h. Upon reaction completion, a 250 μL aliquot of the reaction mixture concentrated via rotary evaporation then re-dissolved in 250 μL of CDCl<sub>3</sub>. The resulting soln was passed through a hydrophobic PTFE 0.2 μm syringe-driven filter unit and dispensed into an NMR tube. To the NMR tube was also added 250 μL of a stock soln of dimethyl fumarate (0.1 M in CDCl<sub>3</sub>). NMR yields were calculated based on relative integrations of the alkenyl peak of dimethyl fumarate and the benzylic proton in the dicarbofunctionalized products.

**Table S1: Solvent Screen for Ni/Photoredox Dicarbofunctionalization<sup>a</sup>**

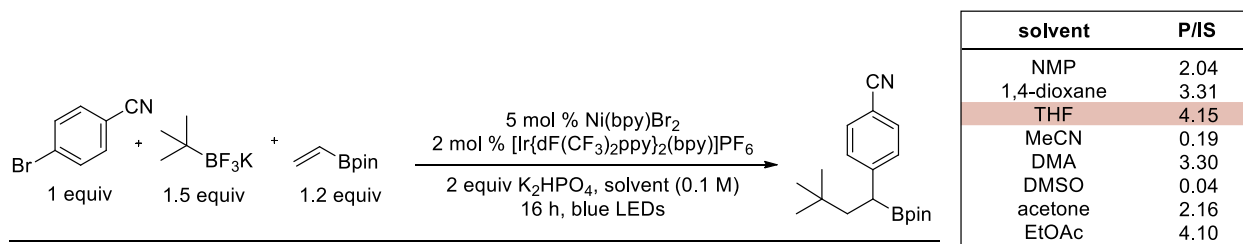

<sup>a</sup>Performed according to **General Optimization Procedure A**

**Table S2: Photocatalyst Screen for Ni/Photoredox Dicarbofunctionalization<sup>a</sup>**

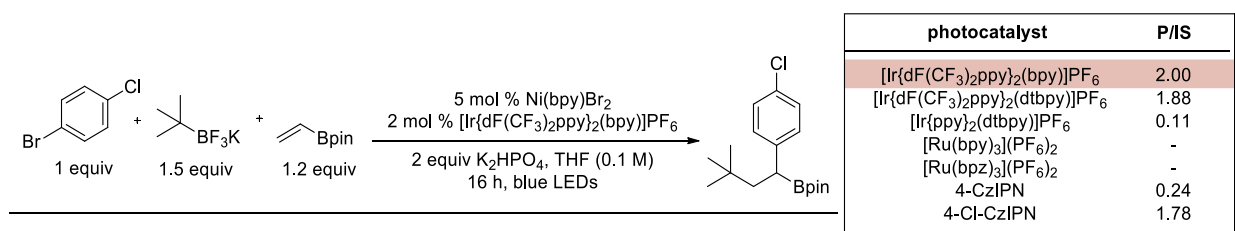

<sup>a</sup>Performed according to **General Optimization Procedure A**

**Table S3: Nickel/Ligand Screen for Ni/Photoredox Dicarbofunctionalization<sup>a</sup>**

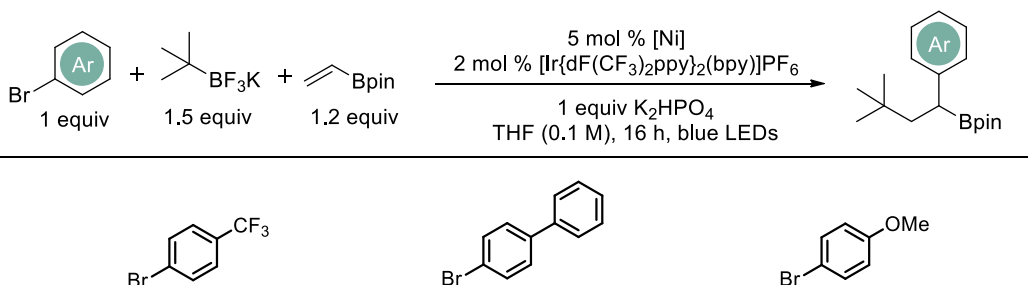

| [Ni]                      | NMR yield (%) | [Ni]                      | NMR yield (%) | [Ni]                      | NMR yield (%) |
|---------------------------|---------------|---------------------------|---------------|---------------------------|---------------|
| Ni(dme)Br <sub>2</sub>    | 15            | Ni(dme)Br <sub>2</sub>    | 0             | Ni(dme)Br <sub>2</sub>    | 0             |
| Ni(dtbbpy)Br <sub>2</sub> | 45            | Ni(dtbbpy)Br <sub>2</sub> | 34            | Ni(dtbbpy)Br <sub>2</sub> | 31            |
| Ni(Me-pyr)Br <sub>2</sub> | 9             | Ni(Me-pyr)Br <sub>2</sub> | 4             | Ni(Me-pyr)Br <sub>2</sub> | 0             |
| Ni(acac) <sub>2</sub>     | 0             | Ni(acac) <sub>2</sub>     | 0             | Ni(acac) <sub>2</sub>     | 0             |
| Ni(TMHD) <sub>2</sub>     | 0             | Ni(TMHD) <sub>2</sub>     | 0             | Ni(TMHD) <sub>2</sub>     | 0             |
| Ni(phthalocN)             | 0             | Ni(phthalocN)             | 0             | Ni(phthalocN)             | 0             |
| Ni(phen)Br <sub>2</sub>   | 31            | Ni(phen)Br <sub>2</sub>   | 41            | Ni(phen)Br <sub>2</sub>   | 6             |
| Ni(imine)Br <sub>2</sub>  | 0             | Ni(imine)Br <sub>2</sub>  | 0             | Ni(imine)Br <sub>2</sub>  | 0             |
| Ni(bpy)Br <sub>2</sub>    | 55            | Ni(bpy)Br <sub>2</sub>    | 29            | Ni(bpy)Br <sub>2</sub>    | 19            |

<sup>a</sup>Performed according to **General Optimization Procedure B**

**structures of nickel complexes assessed**

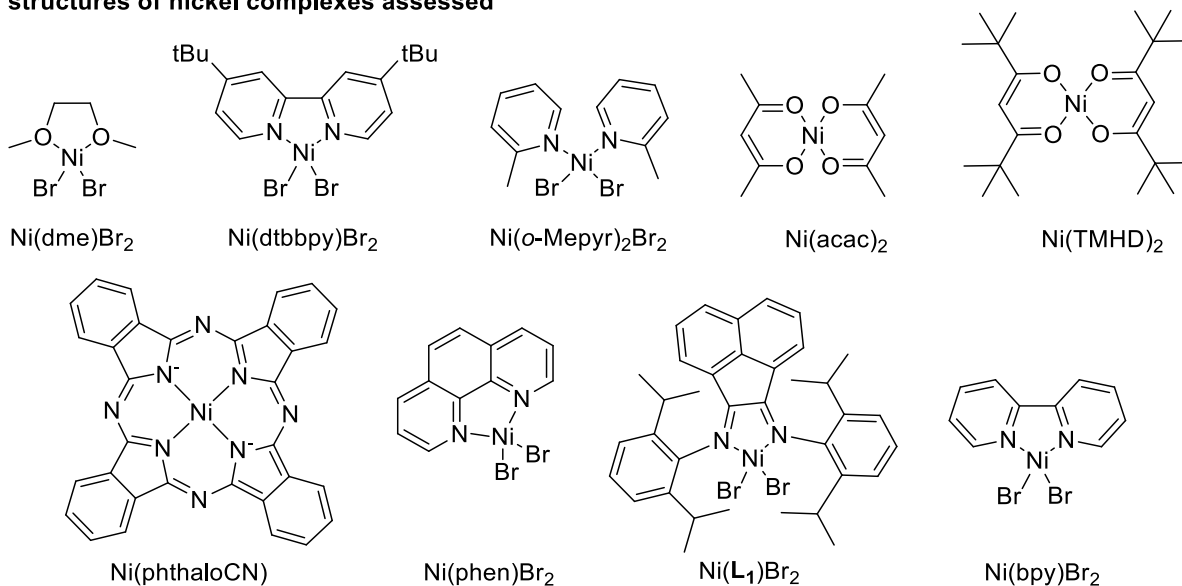

**Table S4: Base Screen for Ni/Photoredox Dicarbofunctionalization<sup>a</sup>**

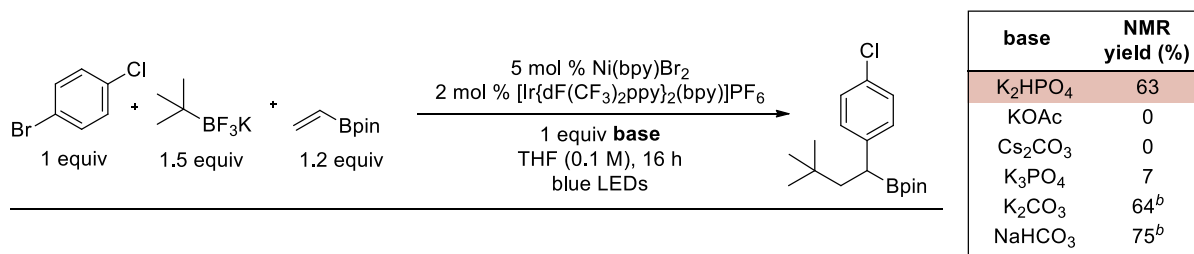

<sup>a</sup>Performed according to **General Optimization Procedure B**<sup>b</sup> Although slightly higher NMR yields were achieved for these entries, the formation of inseparable, undesired products was observed.

**Table S5: Stoichiometry Variation for Ni/Photoredox Dicarbofunctionalization<sup>a</sup>**

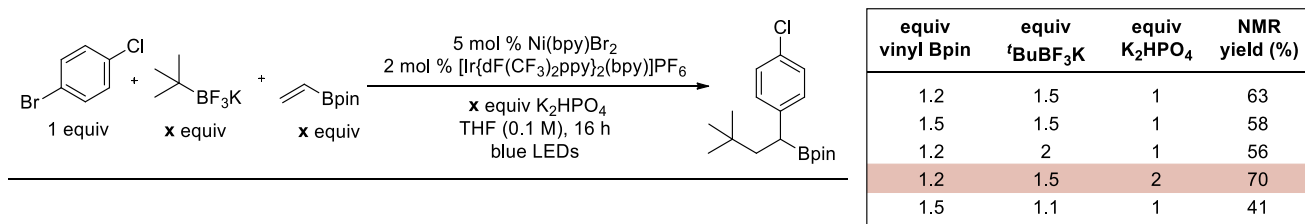

<sup>a</sup>Performed according to **General Optimization Procedure A**

**Table S6: Catalyst Loading Analysis for Ni/Photoredox Dicarbofunctionalization<sup>a</sup>**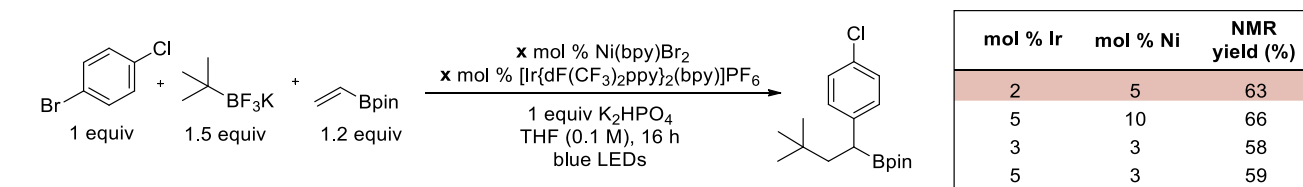

<sup>a</sup>Performed according to **General Optimization Procedure A**

**Table S7: Concentration Screen for Ni/Photoredox Dicarbofunctionalization<sup>a</sup>**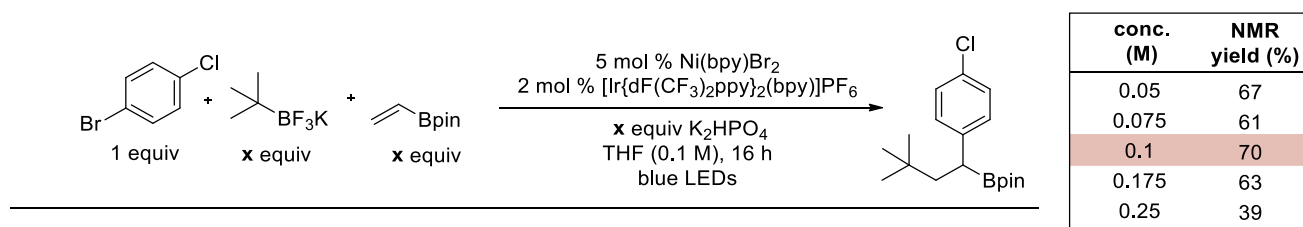

<sup>a</sup>Performed according to **General Optimization Procedure A**



## General Procedure for Ni/Photoredox Dicarbofunctionalization (DCF)

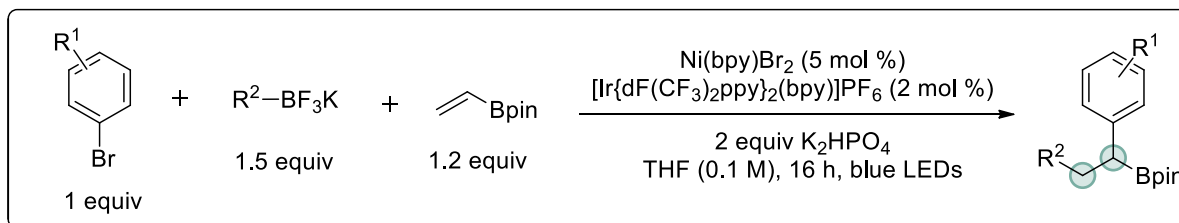

To an 8 mL reaction vial equipped with a stirrer bar was added organotrifluoroborate (0.75 mmol, 1.5 equiv), aryl halide (*if solid*) (0.5 mmol, 1 equiv), K<sub>2</sub>HPO<sub>4</sub> (0.173 g, 1.0 mmol, 2 equiv), anhyd NiBr<sub>2</sub>(bpy) (9.5 mg, 5 mol %), and [Ir{dF(CF<sub>3</sub>)<sub>2</sub>ppy}<sub>2</sub>(bpy)]PF<sub>6</sub> (10 mg, 2 mol %). The reaction vessel was sealed with a cap containing a TFE-lined silicone septum, evacuated, and backfilled with argon three times. VinylBpin (0.093 g, 0.6 mmol, 1.2 equiv) and aryl bromides (*if liquid*) were dissolved in degassed THF (5 mL) and added to the reaction mixture. The vial was further sealed with Parafilm<sup>®</sup> and irradiated with blue LEDs (470 nm, ~10 W, at a distance of ~4.5 cm). The reaction was monitored by TLC. When the reaction was judged complete (typically 16-48 h), the crude reaction mixture was transferred to a round bottom flask and concentrated via rotary evaporation. Further purification was accomplished by passing the crude material through a pad of Celite<sup>®</sup>, eluting with either CH<sub>2</sub>Cl<sub>2</sub> or EtOAc followed by SiO<sub>2</sub> column chromatography (hexanes/EtOAc or hexanes/CH<sub>2</sub>Cl<sub>2</sub>). In select cases, the crude product was passed through a small pad of SiO<sub>2</sub>, eluting with either (hexanes/EtOAc or hexanes/CH<sub>2</sub>Cl<sub>2</sub>). In event that these methods did not provide the pure DCF product, further purification was accomplished by recrystallization from MeOH.

**2-(1-(4-Chlorophenyl)-3,3-dimethylbutyl)-4,4,5,5-tetramethyl-1,3,2-dioxaborolane, 4** (0.111 g, 69%)

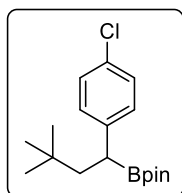

was prepared according to the general DCF procedure. The desired compound **4** was obtained as a crystalline, white solid (mp = 97-99 °C). <sup>1</sup>H NMR (CDCl<sub>3</sub>, 500 MHz) δ 7.20 (d, *J* = 8.4 Hz, 2H), 7.15 (d, *J* = 8.4 Hz, 2H), 2.36 (dd, *J* = 9.7, 3.9 Hz, 1H), 1.98 (dd, *J* = 13.3, 9.7 Hz, 1H), 1.46 (dd, *J* = 13.3, 3.9 Hz, 1H), 1.14 (s, 12H), 0.89 (s, 9H) δ ppm. <sup>13</sup>C NMR (CDCl<sub>3</sub>, 125 MHz) δ 143.7, 130.9, 129.8, 128.6, 83.6, 46.7, 31.7, 29.9, 24.9 (2C), 24.7 (2C) ppm. <sup>11</sup>B NMR (CDCl<sub>3</sub>, 128.4 MHz) δ 32.7. FT-IR (cm<sup>-1</sup>, neat, ATR) 2953 (w), 1489 (w), 1365 (s), 1327 (s), 1140 (vs), 841 (w) HRMS (EI) calcd for C<sub>18</sub>H<sub>28</sub>BClO<sub>2</sub> [M]<sup>+</sup>: 322.1871, found: 322.1862.

**2-(3,3-Dimethyl-1-phenylbutyl)-4,4,5,5-tetramethyl-1,3,2-dioxaborolane, 5** (0.090 g, 62%) was

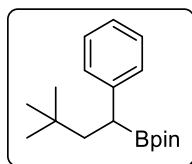

prepared according to the general DCF procedure. The desired compound **5** was obtained as a crystalline, white solid (mp = 80-82 °C). **<sup>1</sup>H NMR** (CDCl<sub>3</sub>, 500 MHz) δ ppm 7.23 (d, *J* = 4.1 Hz, 4H), 7.13 - 7.08 (m, 1H), 2.39 (dd, *J* = 9.9, 3.5 Hz, 3H), 2.02 (dd, *J* = 13.1, 10.1 Hz, 3H), 1.50 (dd, *J* = 13.3, 3.5 Hz, 3H), 1.14 (d, *J* = 2.7 Hz, 12H), 0.90 (s, 9H). **<sup>13</sup>C NMR** (CDCl<sub>3</sub>, 125 MHz) δ ppm 1445.1, 128.5, 128.4, 125.2, 83.5, 46.8, 31.6, 29.9, 24.8, 24.7. **<sup>11</sup>B NMR** (CDCl<sub>3</sub>, 128.4 MHz) δ 32.8. **FT-IR** (cm<sup>-1</sup>, neat, ATR) 2954 (w), 1365 (vs), 1349 (s), 1327 (s), 1143 (s), 702 (m). **HRMS** (EI) calcd for C<sub>18</sub>H<sub>29</sub>BO<sub>2</sub> [M]<sup>+</sup>: 288.2261, found: 288.2253.

**2-(3,3-Dimethyl-1-(*p*-tolyl)butyl)-4,4,5,5-tetramethyl-1,3,2-dioxaborolane, 6** (0.099 g, 66%) was

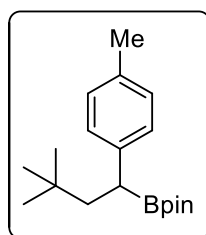

prepared according to the general DCF procedure. The desired compound **6** was obtained as a crystalline, white solid (mp = 93-94 °C). **<sup>1</sup>H NMR** (CDCl<sub>3</sub>, 500 MHz) δ ppm 7.12 (d, *J* = 7.8 Hz, 2H), 7.07 - 7.02 (m, 2H), 2.35 (dd, *J* = 10.1, 3.2 Hz, 1H), 2.29 (s, 3H), 2.01 (dd, *J* = 13.1, 10.2 Hz, 1H), 1.46 (dd, *J* = 13.3, 3.4 Hz, 1H), 1.15 (d, *J* = 3.1 Hz, 12H), 0.90 (s, 9H). **<sup>13</sup>C NMR** (CDCl<sub>3</sub>, 125 MHz) δ ppm 142.0, 134.6, 129.3, 128.3, 83.4, 47.1, 31.6, 30.0, 24.9, 24.7, 21.3. **<sup>11</sup>B NMR** (CDCl<sub>3</sub>, 128.4 MHz) δ 32.8. **FT-IR** (cm<sup>-1</sup>, neat, ATR) 2951 (w), 1364 (s), 1346 (s), 1323 (s), 1142 (vs). **HRMS** (EI) calcd for C<sub>19</sub>H<sub>31</sub>BO<sub>2</sub> [M]<sup>+</sup>: 302.2417, found: 302.2410.

**4-(3,3-Dimethyl-1-(4,4,5,5-tetramethyl-1,3,2-dioxaborolan-2-yl)butyl)benzonitrile, 7** (0.134 g, 86%)

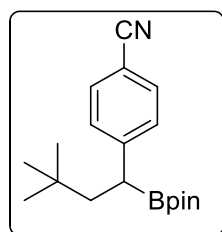

was prepared according to the general DCF procedure. The desired compound **7** was obtained as a crystalline, white solid (mp = 106-108 °C). **<sup>1</sup>H NMR** (CDCl<sub>3</sub>, 500 MHz) δ <sup>1</sup>H NMR (500 MHz, CDCl<sub>3</sub>) δ 7.52 (d, *J* = 8.2 Hz, 2H), 7.32 (d, *J* = 8.2 Hz, 2H), 2.47 (dd, *J* = 9.3, 4.3 Hz, 1H), 2.01 (dd, *J* = 13.4, 9.3 Hz, 1H), 1.49 (dd, *J* = 13.4, 4.3 Hz, 1H), 1.13 (s, 12H), 0.88 (s, 9H) ppm. **<sup>13</sup>C NMR** (CDCl<sub>3</sub>, 125 MHz) δ 151.4, 132.3, 129.2, 119.6, 109.0, 83.9 (2C), 46.2, 31.8, 29.9 (3C), 24.8 (2C), 24.7 (2C) ppm. **<sup>11</sup>B NMR** (CDCl<sub>3</sub>, 128.4 MHz) δ 32.7. **FT-IR** (cm<sup>-1</sup>, neat, ATR) 2957 (w), 2225 (m), 1603 (w), 1365 (s), 1329 (s), 1138 (vs), 840 (m), 559 (w). **HRMS** (EI) calcd for C<sub>19</sub>H<sub>28</sub>BNO<sub>2</sub> [M]<sup>+</sup>: 313.2213, found: 313.2225.

**Methyl 4-(3,3-Dimethyl-1-(4,4,5,5-tetramethyl-1,3,2-dioxaborolan-2-yl)butyl)benzoate, 8** (0.114 g,

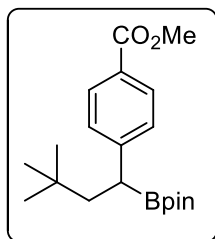

66%) was prepared according to the general DCF procedure *with the following modification*: The reaction was run for 48 h. The desired compound **8** was obtained as a crystalline, white solid (mp = 100-102 °C). <sup>1</sup>H NMR (CDCl<sub>3</sub>, 500 MHz) δ 7.91 (d, *J* = 8.1 Hz, 2H), 7.29 (d, *J* = 8.1 Hz, 2H), 3.88 (s, 3H), 2.48 (dd, *J* = 9.4, 4.1 Hz, 1H), 2.03 (dd, *J* = 13.3, 9.4 Hz, 1H), 1.52 (dd, *J* = 13.4, 4.1 Hz, 1H), 1.13 (s, 12H), 0.89 (s, 9H) ppm <sup>13</sup>C NMR (CDCl<sub>3</sub>, 125 MHz) δ 167.6, 151.1, 129.9 (2C), 128.4 (2C), 127.2, 83.7 (2C), 52.2, 46.3, 31.8, 30.0 (3C), 24.8 (2C), 24.7 (2C) ppm <sup>11</sup>B NMR (CDCl<sub>3</sub>, 128.4 MHz) δ 32.5. FT-IR (cm<sup>-1</sup>, neat, ATR) 2952 (w), 1718 (vs), 1365 (m), 1327 (m), 1282 (vs), 1140 (m), 1107 (w). HRMS (EI) calcd for C<sub>20</sub>H<sub>31</sub>BO<sub>4</sub> [M]<sup>+</sup>: 346.2315, found: 346.2319.

**2-(3,3-Dimethyl-1-(4-(trifluoromethyl)phenyl)butyl)-4,4,5,5-tetramethyl-1,3,2-dioxaborolane, 9**

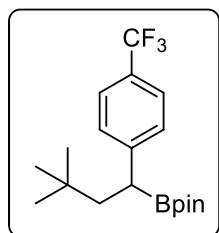

(0.144 g, 81%) was prepared according to the general DCF procedure. The desired compound **9** was obtained as a crystalline, white solid (mp = 94-96 °C). <sup>1</sup>H NMR (CDCl<sub>3</sub>, 500 MHz) δ 7.53 – 7.43 (d, *J* = 8.0 Hz, 2H), 7.33 (d, *J* = 8.0 Hz, 2H), 2.47 (dd, *J* = 9.6, 4.0 Hz, 1H), 2.03 (dd, *J* = 13.3, 9.6 Hz, 1H), 1.50 (dd, *J* = 13.3, 4.0 Hz, 1H), 1.14 (s, 12H), 0.90 (s, 9H) ppm <sup>13</sup>C NMR (CDCl<sub>3</sub>, 125 MHz) δ ppm 149.6, 128.7, 127.4 (q, *J*<sub>C-C-F</sub> = 31.9 Hz), 125.3 (q, *J*<sub>C-C-C-F</sub> = 3.6 Hz), 124.7 (q, *J*<sub>C-F</sub> = 272.5 Hz), 83.8, 46.6, 31.8, 29.9, 24.9, 24.7 <sup>11</sup>B NMR (CDCl<sub>3</sub>, 128.4 MHz) δ 32.6. <sup>19</sup>F NMR (CDCl<sub>3</sub>, 471 MHz) δ -115.17 (s, 1 F). FT-IR (cm<sup>-1</sup>, neat, ATR) 2958 (vw), 1324 (s), 1123 (m), 906 (s), 729 (vs). HRMS (EI) calcd for C<sub>19</sub>H<sub>28</sub>BF<sub>3</sub>O<sub>2</sub> [M]<sup>+</sup>: 356.2134, found: 356.2143.

**2-(1-(4-Methoxyphenyl)-3,3-dimethylbutyl)-4,4,5,5-tetramethyl-1,3,2-dioxaborolane, 10** (0.085 g,

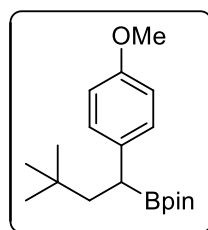

53%) was prepared according to the general DCF procedure *with the following modification*: NiBr<sub>2</sub>(dtbbpy) was used as the Ni catalyst. The desired compound **10** was obtained as a crystalline, white solid (mp = 106-108 °C). <sup>1</sup>H NMR (CDCl<sub>3</sub>, 500 MHz) δ 7.14 (d, *J* = 8.2 Hz, 2H), 6.79 (d, *J* = 8.2 Hz, 2H), 3.77 (s, 3H), 2.33 (d, *J* = 9.6 Hz, 1H), 1.98 (t, *J* = 13.1 Hz, 1H), 1.45 (d, *J* = 13.1 Hz, 1H), 1.14 (s, 12H), 0.89 (s, 9H) ppm. <sup>13</sup>C NMR (CDCl<sub>3</sub>, 125 MHz) δ 157.5, 137.1, 129.3 (2C), 114.0 (2C), 83.4 (2C), 55.5, 47.1, 31.6, 30.0 (3C), 24.9 (2C), 24.7 (2C) ppm <sup>11</sup>B NMR (CDCl<sub>3</sub>, 128.4 MHz) δ 32.8. FT-IR (cm<sup>-1</sup>, neat, ATR) 2951 (m), 1508 (vs), 1366 (s), 1322 (s), 1246 (s), 1143 (vs). HRMS (EI) calcd for C<sub>19</sub>H<sub>31</sub>BO<sub>3</sub> [M]<sup>+</sup>: 318.2366, found: 318.2352.

**2-(1-([1,1'-Biphenyl]-4-yl)-3,3-dimethylbutyl)-4,4,5,5-tetramethyl-1,3,2-dioxaborolane, 11** (0.165 g,

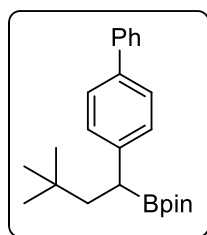

91%) was prepared according to the general DCF procedure *with the following modification*: NiBr<sub>2</sub>(phen) used as the Ni catalyst. The desired compound **11** was obtained as a crystalline, white solid (mp = 101-103 °C). <sup>1</sup>H NMR (CDCl<sub>3</sub>, 500 MHz) δ ppm 7.57 - 7.61 (m, 2H), 7.49 (d, *J* = 8.1 Hz, 2H), 7.41 (t, *J* = 7.5 Hz, 2H), 7.28 - 7.33 (m, 3H), 2.44 (dd, *J* = 9.9, 3.7 Hz, 1H), 2.06 (dd, *J* = 13.3, 10.1 Hz, 1H), 1.53 (dd, *J* = 13.3, 3.7 Hz, 1H), 1.16 (d, *J* = 2.1 Hz, 12H), 0.92 (s, 9H). <sup>13</sup>C NMR (CDCl<sub>3</sub>, 125 MHz) δ ppm 144.3, 141.4, 138.0, 128.9, 128.8, 127.2, 127.1(4), 127.1(0), 83.6, 46.9, 31.7, 30.0, 24.9, 24.7. <sup>11</sup>B NMR (CDCl<sub>3</sub>, 128.4 MHz) δ 33.1. FT-IR (cm<sup>-1</sup>, neat, ATR) 2951 (w), 1365 (s), 1322 (s), 1141 (vs), 697 (m). HRMS (EI) calcd for C<sub>24</sub>H<sub>33</sub>BO<sub>2</sub> [M]<sup>+</sup>: 364.2574, found: 364.2598.

**2-(3,3-Dimethyl-1-(4-(methylsulfonyl)phenyl)butyl)-4,4,5,5-tetramethyl-1,3,2-dioxaborolane, 12**

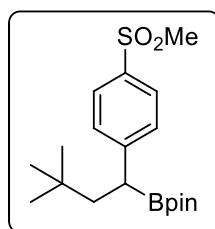

(0.146 g, 80%) was prepared according to the general DCF procedure. The desired compound **12** was obtained as a crystalline, white solid (mp = 143-145 °C). <sup>1</sup>H NMR (CDCl<sub>3</sub>, 500 MHz) δ ppm 7.80 (d, *J* = 7.3 Hz, 2H), 7.42 (d, *J* = 7.6 Hz, 2H), 3.03 (s, 3H), 2.51 (d, *J* = 9.0 Hz, 1H), 2.01 - 2.08 (m, 1H), 1.50 (d, *J* = 13.4 Hz, 1H), 1.14 (s, 12H), 0.90 (s, 9H). <sup>13</sup>C NMR (CDCl<sub>3</sub>, 125 MHz) δ ppm 152.4, 137.4, 129.3, 127.6, 84.0, 46.5, 44.9, 31.8, 29.9, 24.9, 24.7. <sup>11</sup>B NMR (CDCl<sub>3</sub>, 128.4 MHz) δ 32.6. FT-IR (cm<sup>-1</sup>, neat, ATR) 2952 (w), 1366 (w), 1318 (m), 1305 (s), 1139 (vs). HRMS (EI) calcd for C<sub>19</sub>H<sub>31</sub>BO<sub>4</sub>S [M]<sup>+</sup>: 366.2036, found: 366.2032.

**(4-(3,3-Dimethyl-1-(4,4,5,5-tetramethyl-1,3,2-dioxaborolan-2-yl)butyl)phenyl)methanol, 13** (0.073 g,

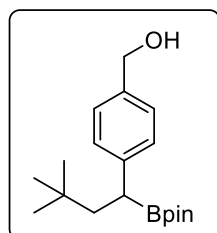

58%) was prepared according to the general DCF procedure *with the following modification*: upon reaction completion, AcOH (3 equiv, 86 μL, 1.5 mmol) was added to the reaction, and the reaction was stirred for 5 minutes prior to chromatographic purification. The desired compound **13** was obtained as a dense, colorless oil. <sup>1</sup>H NMR (CDCl<sub>3</sub>, 500 MHz) δ ppm 7.25 - 7.21 (m, 4H), 4.63 (s, 2H), 2.39 (dd, *J* = 9.9, 3.8 Hz, 1H), 2.01 (dd, *J* = 13.3, 9.9 Hz, 1H), 1.60 (br. s, 1H), 1.47 (dd, *J* = 13.4, 3.7 Hz, 1H), 1.14 (d, *J* = 3.1 Hz, 12H), 0.90 (s, 9H). <sup>13</sup>C NMR (CDCl<sub>3</sub>, 125 MHz) δ ppm 144.8, 137.8, 128.7, 127.5, 83.5, 65.6, 46.9, 31.7, 29.9, 24.9, 24.7. <sup>11</sup>B NMR (CDCl<sub>3</sub>, 128.4 MHz) δ 33.4. FT-IR (cm<sup>-1</sup>, neat, ATR) 3320 (br), 2951 (m), 1385 (m), 1293 (m), 1122 (s). HRMS (EI) calcd for C<sub>18</sub>H<sub>31</sub>BO<sub>3</sub> [M]<sup>+</sup>: 318.2366, found: 318.2358.

#### 4-((4-(3,3-Dimethyl-1-(4,4,5,5-tetramethyl-1,3,2-dioxaborolan-2-yl)butyl)phenyl)sulfonyl)

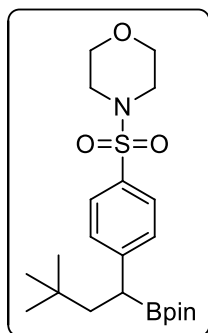

**Morpholine, 14** (0.210 g, 98%) was prepared according to the general DCF procedure. The desired compound **14** was obtained as a crystalline, white solid (mp = 219-221 °C). **<sup>1</sup>H NMR** (CDCl<sub>3</sub>, 500 MHz) δ ppm 7.61 (d, *J* = 7.5 Hz, 2H), 7.40 (d, *J* = 7.6 Hz, 2H), 3.73 (br s, 4H), 2.97 (br s, 4H), 2.51 (d, *J* = 9.0 Hz, 1H), 2.04 (dd, *J* = 12.7, 10.2 Hz, 1H), 1.49 - 1.54 (m, 1H), 1.13 (s, 12H), 0.90 (s, 9H). **<sup>13</sup>C NMR** (CDCl<sub>3</sub>, 125 MHz) δ ppm 151.6, 131.7, 129.0, 128.2, 83.9, 66.4, 46.3, 46.2, 31.8, 29.9, 24.8, 24.7. **<sup>11</sup>B NMR** (CDCl<sub>3</sub>, 128.4 MHz) δ 33.2. **FT-IR** (cm<sup>-1</sup>, neat, ATR)

2978 (w), 2950 (w), 2862 (w), 1345 (s), 1165 (vs), 1140 (m), 1115 (m), 947 (m). **HRMS** (ESI) calcd for C<sub>22</sub>H<sub>37</sub>BNO<sub>5</sub>S [M+H]<sup>+</sup>: 438.2469, found: 438.2486.

#### 4-(3,3-Dimethyl-1-(4,4,5,5-tetramethyl-1,3,2-dioxaborolan-2-yl)butyl)-*N*-

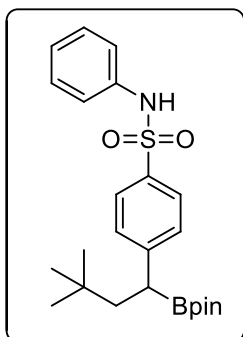

**phenylbenzenesulfonamide, 15** (0.190 g, 86%) was prepared according to the general DCF procedure. The desired compound **15** was obtained as a crystalline, white solid (mp = 149-151 °C). **<sup>1</sup>H NMR** (CDCl<sub>3</sub>, 500 MHz) δ ppm 7.61 (d, *J* = 7.9 Hz, 2H), 7.26 - 7.29 (m, 2H), 7.16 - 7.23 (m, 2H), 7.09 (d, *J* = 6.9 Hz, 1H), 7.02 (d, *J* = 7.8 Hz, 2H), 6.45 (s, 1H), 2.48 - 2.41 (m, 1H), 2.02 - 1.92 (m, 1H), 1.52 - 1.44 (m, 1H), 1.09 (s, 12H), 0.86 (s, 9H). **<sup>13</sup>C NMR** (CDCl<sub>3</sub>, 125 MHz) δ ppm 151.4, 136.8, 135.5, 129.5, 128.9, 127.6, 125.7, 122.2, 83.8, 45.9, 31.7, 29.9,

24.7, 24.6. **<sup>11</sup>B NMR** (CDCl<sub>3</sub>, 128.4 MHz) δ 32.7. **FT-IR** (cm<sup>-1</sup>, neat, ATR) 3256 (w), 2954 (w), 1330 (m), 1157 (vs), 1140 (vs). **HRMS** (EI) calcd for C<sub>24</sub>H<sub>34</sub>BNO<sub>4</sub>S [M]<sup>+</sup>: 443.2302, found: 443.2309.

#### *tert*-Butyl Acetyl(4-(3,3-dimethyl-1-(4,4,5,5-tetramethyl-1,3,2-dioxaborolan-2-yl)butyl)phenyl)

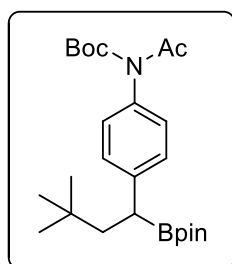

**carbamate, 16** (0.156 g, 70%) was prepared according to the general DCF procedure. The desired compound **16** was obtained as a crystalline, white solid (mp = 99-101 °C). **<sup>1</sup>H NMR** (CDCl<sub>3</sub>, 500 MHz) δ ppm 7.24 (d, *J* = 8.4 Hz, 2H), 6.93 (d, *J* = 8.2 Hz, 2H), 2.52 (s, 3H), 2.43 (dd, *J* = 9.8, 3.8 Hz, 1H), 2.00 (dd, *J* = 13.3, 9.9 Hz, 1H), 1.54 (dd, *J* = 13.4, 4.0 Hz, 1H), 1.34 (s, 9H), 1.12 (s, 12H), 0.89 (s, 9H). **<sup>13</sup>C NMR** (CDCl<sub>3</sub>, 125 MHz) δ ppm 173.3, 153.2, 144.7, 136.2, 128.9, 128.0, 83.5,

83.0, 46.3, 31.7, 30.0, 28.1, 26.7, 24.8, 24.7. **<sup>11</sup>B NMR** (CDCl<sub>3</sub>, 128.4 MHz) δ 32.3. **FT-IR** (cm<sup>-1</sup>, neat, ATR) 2978 (w), 2951 (w), 1735 (s), 1709 (s), 1367 (s), 1270 (vs), 1254 (s), 1154 (vs), 1142 (vs), 1095 (s). **HRMS** (ESI) calcd for C<sub>25</sub>H<sub>40</sub>BNO<sub>5</sub> [M+ Na]<sup>+</sup>: 268.2897, found: 268.2898.

## 2-(1-(3-(Methoxymethoxy)phenyl)-3,3-dimethylbutyl)-4,4,5,5-tetramethyl-1,3,2-dioxaborolane, 17

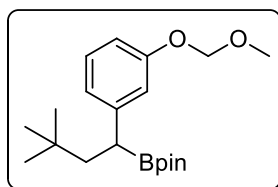

(0.098 g, 59%) was prepared according to the general DCF procedure. The desired compound **17** was obtained as a colorless, dense oil.  $^1\text{H NMR}$  ( $\text{CDCl}_3$ , 500 MHz)  $\delta$  ppm 7.14 (t,  $J = 7.9$  Hz, 1H), 6.92 (t,  $J = 1.8$  Hz, 1H), 6.88 (d,  $J = 7.6$  Hz, 1H), 6.77 - 6.81 (m, 1H), 5.15 (q,  $J = 6.2$  Hz, 2H), 3.47 (s, 3H), 2.36 (dd,  $J = 10.0, 3.6$  Hz, 1H), 2.00 (dd,  $J = 13.4, 10.0$  Hz, 1H), 1.48 (dd,  $J = 13.4, 3.7$  Hz, 1H), 1.15 (d,  $J = 3.1$  Hz, 12H), 0.90 (s, 9H).  $^{13}\text{C NMR}$  ( $\text{CDCl}_3$ , 125 MHz)  $\delta$  ppm 157.5, 146.9, 129.4, 122.3, 116.6, 113.1, 94.8, 83.5, 56.2, 46.8, 31.6, 29.9, 24.9, 24.7.  $^{11}\text{B NMR}$  ( $\text{CDCl}_3$ , 128.4 MHz)  $\delta$  32.3. **FT-IR** ( $\text{cm}^{-1}$ , neat, ATR) 2952 (m), 1366 (m), 1321 (m), 1147 (vs), 1020 (m). **HRMS** (EI) calcd for  $\text{C}_{20}\text{H}_{33}\text{BO}_4$   $[\text{M}]^+$ : 348.2472, found: 348.2482.

## 1-(3-(3,3-Dimethyl-1-(4,4,5,5-tetramethyl-1,3,2-dioxaborolan-2-yl)butyl)phenyl)-2,2,2-trifluoroethanone, 18

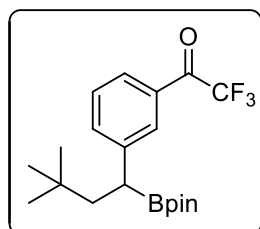

(0.184 g, 99%) was prepared according to the general DCF procedure. The desired compound **18** was obtained as a clear, colorless oil.  $^1\text{H NMR}$  ( $\text{CDCl}_3$ , 500 MHz)  $\delta$  7.95 (s, 1H), 7.83 (d,  $J = 7.7$  Hz, 1H), 7.58 (dt,  $J = 7.7, 1.3$  Hz, 1H), 7.41 (t,  $J = 7.7$  Hz, 1H), 2.49 (dd,  $J = 9.4, 3.9$  Hz, 1H), 2.04 (dd,  $J = 13.4, 9.5$  Hz, 1H), 1.49 (dd,  $J = 13.4, 4.0$  Hz, 1H), 1.14 (s, 12H), 0.90 (s, 9H).  $^{13}\text{C NMR}$  ( $\text{CDCl}_3$ , 125 MHz)  $\delta$  181.0 (q,  $\text{C-C-F}$   $J = 35.4$  Hz, C), 146.7, 136.0, 130.2, 130.0, 129.3, 127.3 (q,  $\text{C-C-C-F}$   $J = 2.2$  Hz, C), 117.0 (q,  $\text{C-F}$   $J = 291.9$  Hz,  $\text{CF}_3$ ), 83.8, 46.8, 31.7, 29.9, 24.8, 24.7.  $^{19}\text{F NMR}$  ( $\text{CDCl}_3$ , 471 MHz) -71.14 (s, 3F).  $^{11}\text{B NMR}$  ( $\text{CDCl}_3$ , 128.4 MHz)  $\delta$  32.6. **FT-IR** ( $\text{cm}^{-1}$ , neat, ATR) 2959 (w), 1716 (m), 1365 (m), 1325 (m), 1199 (s), 1143 (vs), 966 (w), 734 (m). **HRMS** (EI) calcd for  $\text{C}_{20}\text{H}_{29}\text{BF}_3\text{O}_3$   $[\text{M}+\text{H}]^+$ : 385.2162, found: 385.2148.

## *N,N*-Dibenzyl-4-(3,3-dimethyl-1-(4,4,5,5-tetramethyl-1,3,2-dioxaborolan-2-yl)butyl)benzamide, 19

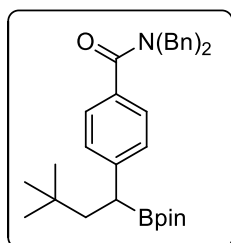

(0.191 g, 75%) was prepared according to the general DCF procedure. The desired compound **19** was obtained as a crystalline, white solid (mp = 115-116 °C).  $^1\text{H NMR}$  ( $\text{CDCl}_3$ , 500 MHz)  $\delta$  ppm 7.39 (d,  $J = 7.9$  Hz, 2H), 7.26 - 7.37 (m, 8H), 7.23 (d,  $J = 7.9$  Hz, 2H), 7.13 (br s, 2H), 4.69 (br s, 2H), 4.41 (br s, 2H), 2.40 (dd,  $J = 9.7, 3.6$  Hz, 1H), 1.99 (dd,  $J = 13.2, 9.8$  Hz, 1H), 1.46 (dd,  $J = 13.4, 3.7$  Hz, 1H), 1.12 (s, 12H), 0.88 (s, 9H).  $^{13}\text{C NMR}$  ( $\text{CDCl}_3$ , 125 MHz)  $\delta$  ppm 172.7, 147.2, 132.8, 128.9, 128.5, 128.4, 127.7, 127.2, 127.1, 83.5, 51.8, 47.1, 46.4, 31.5, 29.8, 24.7, 24.6.  $^{11}\text{B NMR}$  ( $\text{CDCl}_3$ , 128.4 MHz)  $\delta$  33.3. **FT-IR** ( $\text{cm}^{-1}$ , neat, ATR) 2951 (w), 1635 (s), 1364 (s), 1324 (s), 1140 (vs), 699 (s). **HRMS** (EI) calcd for  $\text{C}_{33}\text{H}_{42}\text{BNO}_3$   $[\text{M}]^+$ : 511.3258, found: 511.3258.

**Potassium (1-(4-Acetylphenyl)-3,3-dimethylbutyl)trifluoroborate, 20** (0.133 g, 88%) was prepared

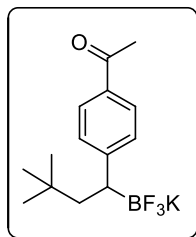

according to the general DCF procedure *with the following modification*: After filtration of the crude reaction through Celite, the solvent was removed, and the crude material was converted to the trifluoroborate following **GPA2**. The desired compound **20** was obtained as a crystalline yellow solid (mp = 152-153 °C). **<sup>1</sup>H NMR** (CDCl<sub>3</sub>, 500 MHz) δ ppm 7.69 (d, *J*=8.2 Hz, 2 H), 7.26 (d, *J*=8.1 Hz, 2 H), 2.46 (s, 3 H), 1.99 - 1.90 (m, 1 H), 1.84 - 1.71 (m, 2 H), 0.71 (s, 9 H). **<sup>13</sup>C NMR** (CDCl<sub>3</sub>, 125 MHz) δ ppm 205.9, 197.1, 161.1, 132.6, 129.0, 127.7, 45.8, 32.8, 30.5, 26.1. **<sup>11</sup>B NMR** (CDCl<sub>3</sub>, 128.4 MHz) δ 4.13. **<sup>19</sup>F NMR** (CDCl<sub>3</sub>, 471 MHz) -146.0 (s, 3F). **FT-IR** (cm<sup>-1</sup>, neat, ATR) 2950 (w), 1669 (m), 1600 (m), 1361 (m), 1277 (m), 955 (s). **HRMS** (ESI) calcd for C<sub>14</sub>H<sub>19</sub>BF<sub>3</sub>O [M-K<sup>+</sup>]: 271.1481, found: 271.1494.

**2-(3,3-Dimethyl-1-(4,4,5,5-tetramethyl-1,3,2-dioxaborolan-2-yl)butyl)benzonitrile, 21** (0.099 g, 63%)

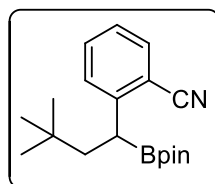

was prepared according to the general DCF procedure *with the following modification*: The reaction was run for 48 h. The desired compound **21** was obtained as a crystalline, white solid (mp = 78-80 °C). **<sup>1</sup>H NMR** (CDCl<sub>3</sub>, 500 MHz) δ ppm 7.56 (d, *J* = 7.8 Hz, 1H), 7.39 - 7.48 (m, 2H), 7.19 (t, *J* = 7.4 Hz, 1H), 2.87 (dd, *J* = 7.5, 5.5 Hz, 1H), 2.02 (dd, *J* = 13.5, 8.2 Hz, 1H), 1.54 (dd, *J* = 13.7, 5.3 Hz, 1H), 1.17 (d, *J* = 9.8 Hz, 12H), 0.90 (s, 9H). **<sup>13</sup>C NMR** (CDCl<sub>3</sub>, 125 MHz) δ ppm 149.8, 133.3, 132.6, 129.3, 125.7, 118.9, 112.7, 83.9, 46.8, 31.9, 29.2 - 30.2 (m), 24.9, 24.8. **<sup>11</sup>B NMR** (CDCl<sub>3</sub>, 128.4 MHz) δ 32.4. **FT-IR** (cm<sup>-1</sup>, neat, ATR) 2955 (m), 2224 (w), 1356 (s), 1325 (s), 1319 (m), 1141 (vs). **HRMS** (EI) calcd for C<sub>19</sub>H<sub>28</sub>BNO<sub>2</sub>[M]<sup>+</sup>: 313.2213, found: 313.2217.

**2-(1-(2-Chlorophenyl)-3,3-dimethylbutyl)-4,4,5,5-tetramethyl-1,3,2-dioxaborolane, 22** (0.069 g,

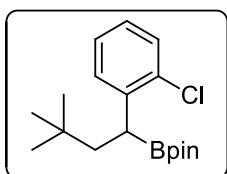

43%) was prepared according to the general DCF procedure *with the following modification*: The reaction was run for 48 h. The desired compound **22** was obtained as a crystalline, white solid (mp = 68-70 °C). **<sup>1</sup>H NMR** (CDCl<sub>3</sub>, 500 MHz) δ ppm 7.32 (dd, *J* = 15.0, 7.8 Hz, 2H), 7.15 (t, *J* = 7.2 Hz, 1H), 7.04 (t, *J* = 7.5 Hz, 1H), 2.92 (dd, *J* = 7.3, 4.7 Hz, 1H), 1.97 (dd, *J* = 13.4, 8.5 Hz, 1H), 1.49 (dd, *J* = 13.4, 4.3 Hz, 1H), 1.18 (d, *J* = 8.4 Hz, 12H), 0.90 (s, 9H). **<sup>13</sup>C NMR** (CDCl<sub>3</sub>, 125 MHz) δ ppm 143.1, 133.9, 130.2, 129.7, 126.8, 126.4, 83.6, 46.4, 31.6 - 32.1 (m), 29.9, 24.9, 24.8. **<sup>11</sup>B NMR** (CDCl<sub>3</sub>, 128.4 MHz) δ 32.7. **FT-IR** (cm<sup>-1</sup>, neat, ATR) 2952 (w), 1365 (s), 1321 (s), 1141 (vs). **HRMS** (EI) calcd for C<sub>18</sub>H<sub>28</sub>BClO<sub>2</sub> [M]<sup>+</sup>: 322.1871, found: 322.1866.

**2-(1-(3,5-di-*tert*-Butylphenyl)-3,3-dimethylbutyl)-4,4,5,5-tetramethyl-1,3,2-dioxaborolane, 23** (0.110

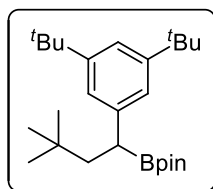

g, 55%) was prepared according to the general DCF procedure *with the following modification*: The reaction was run for 48 h. The desired compound **23** was obtained as a crystalline, white solid (mp = 111-112 °C). **<sup>1</sup>H NMR** (CDCl<sub>3</sub>, 500 MHz) δ ppm 7.14 - 7.17 (m, 1H), 7.07 (d, *J* = 1.5 Hz, 2H), 2.38 (dd, *J* = 11.0, 2.4 Hz, 1H), 2.04 (dd, *J* = 13.0, 11.1 Hz, 1H), 1.49 (dd, *J* = 13.1, 2.6 Hz, 1H), 1.30 (s, 18H), 1.14 (d, *J* = 3.8 Hz, 12H), 0.92 (s, 9H). **<sup>13</sup>C NMR** (CDCl<sub>3</sub>, 125 MHz) δ ppm 150.5, 143.7, 122.9, 119.1, 83.3, 47.1, 35.1, 31.8, 31.6, 30.0, 25.0, 24.6. **<sup>11</sup>B NMR** (CDCl<sub>3</sub>, 128.4 MHz) δ 32.8. **FT-IR** (cm<sup>-1</sup>, neat, ATR) 2953 (m), 2865 (s), 1362 (m), 11433 (s), 870 (w). **HRMS** (EI) calcd for C<sub>26</sub>H<sub>45</sub>BO<sub>2</sub> [M]<sup>+</sup>: 400.3513, found: 400.3515.

**2-(1-(3,5-Dimethoxyphenyl)-3,3-dimethylbutyl)-4,4,5,5-tetramethyl-1,3,2-dioxaborolane, 24** (0.141

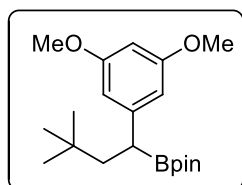

g, 81%) was prepared according to the general DCF procedure. The desired compound **24** was obtained as a crystalline, white solid (mp = 74-75 °C). **<sup>1</sup>H NMR** (CDCl<sub>3</sub>, 500 MHz) δ ppm 6.41 (s, 2H), 6.24 (s, 1H), 3.76 (s, 6H), 2.32 (dd, *J* = 9.8, 2.5 Hz, 1H), 1.98 (dd, *J* = 13.0, 10.3 Hz, 1H), 1.47 (dd, *J* = 13.3, 2.9 Hz, 1H), 1.16 (s, 12H), 0.90 (s, 9H). **<sup>13</sup>C NMR** (CDCl<sub>3</sub>, 125 MHz) δ ppm 160.9, 147.6, 106.4, 97.8, 83.6, 55.5, 46.9, 31.6, 29.9, 25.0, 24.7. **<sup>11</sup>B NMR** (CDCl<sub>3</sub>, 128.4 MHz) δ 32.7. **FT-IR** (cm<sup>-1</sup>, neat, ATR) 2951 (w), 1593 (m), 1364 (m), 1318 (m), 1204 (m), 1140 (vs) **HRMS** (EI) calcd for C<sub>20</sub>H<sub>33</sub>BO<sub>4</sub> [M]<sup>+</sup>: 348.2472, found: 348.2471.

**2-(3,3-Dimethyl-1-(4-(1-(trifluoromethyl)cyclopropyl)phenyl)butyl)-4,4,5,5-tetramethyl-1,3,2-**

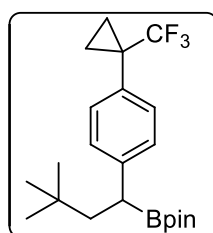

**dioxaborolane, 25** (0.091 g, 46%) was prepared according to the general DCF procedure. The desired compound **25** was obtained as clear, colorless oil. **<sup>1</sup>H NMR** (CDCl<sub>3</sub>, 500 MHz) δ 7.30 (d, *J* = 7.7 Hz, 2H), 7.18 (d, *J* = 7.7 Hz, 2H), 2.38 (dd, *J* = 10.1, 2.6 Hz, 1H), 2.02 (dd, *J* = 12.7, 11.0 Hz, 1H), 1.45 (dd, *J* = 13.4, 2.9 Hz, 1H), 1.28 - 1.31 (m, 2H), 1.14 (s, 12H), 0.99 (br s, 2H), 0.90 (s, 9H). **<sup>13</sup>C NMR** (CDCl<sub>3</sub>, 125 MHz) δ 145.3, 132.9, 131.3, 128.3, 126.8 (q, *J*<sub>C-F</sub> = 273.1 Hz, CF<sub>3</sub>), 83.6, 46.9, 31.6, 29.9, 28.0 (q, *J*<sub>C-C-F</sub> = 33.2 Hz, C), 24.9, 24.7, 9.9. **<sup>19</sup>F NMR** (CDCl<sub>3</sub>, 471 MHz) -70.11 (s, 3F). **<sup>11</sup>B NMR** (CDCl<sub>3</sub>, 128.4 MHz) δ 33.0. **FT-IR** (cm<sup>-1</sup>, neat, ATR) 2954 (w), 1360 (m), 1324 (m), 1136 (vs), 1087 (m), 839 (w), 735 (w), 573 (m). **HRMS** (EI) calcd for C<sub>22</sub>H<sub>32</sub>BF<sub>3</sub>O<sub>2</sub> [M]<sup>+</sup>: 396.2447, found: 396.2446.

**5-(3,3-Dimethyl-1-(4,4,5,5-tetramethyl-1,3,2-dioxaborolan-2-yl)butyl)isobenzofuran-1(3H)-one, 26** (0.130 g, 76%) was prepared according to the general DCF procedure. The desired compound **26** was



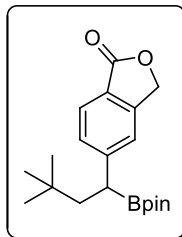

obtained as a crystalline, white solid (mp = 111-113 °C). **<sup>1</sup>H NMR** (CDCl<sub>3</sub>, 500 MHz) δ ppm 7.78 (d, *J* = 7.9 Hz, 1H), 7.40 (d, *J* = 7.9 Hz, 1H), 7.33 (s, 1H), 5.26 (s, 2H), 2.55 (dd, *J* = 9.3, 4.1 Hz, 1H), 2.06 (dd, *J* = 13.3, 9.3 Hz, 1H), 1.53 (dd, *J* = 13.4, 4.1 Hz, 1H), 1.14 (s, 12H), 0.90 (s, 9H). **<sup>13</sup>C NMR** (CDCl<sub>3</sub>, 125 MHz) δ ppm 171.6, 153.1, 147.4, 129.7, 125.7, 123.0, 121.6, 84.0, 69.8, 46.6, 31.8, 29.9, 24.8, 24.7. **<sup>11</sup>B NMR** (CDCl<sub>3</sub>, 128.4 MHz) δ 32.7. **FT-IR** (cm<sup>-1</sup>, neat, ATR) 2954 (w), 1768 (vs) 1352 (m) 1136 (m), 1035 (m). **HRMS** (EI) calcd for C<sub>20</sub>H<sub>29</sub>BO<sub>4</sub> [M]<sup>+</sup>: 344.2159, found: 344.2168.

**2-(1-(4-(1,3-Dioxolan-2-yl)phenyl)-3,3-dimethylbutyl)-4,4,5,5-tetramethyl-1,3,2-dioxaborolane, 27**

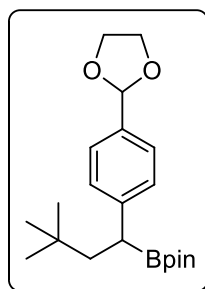

(0.106 g, 59%) was prepared according to the general DCF procedure. The desired compound **27** was obtained as a crystalline, white solid (mp = 88-90 °C). **<sup>1</sup>H NMR** (CDCl<sub>3</sub>, 500 MHz) δ ppm 7.34 (d, *J* = 7.9 Hz, 2H), 7.24 (d, *J* = 8.1 Hz, 2H), 5.75 (s, 1H), 4.11 - 4.16 (m, 2H), 4.00 - 4.04 (m, 2H), 2.40 (dd, *J* = 9.8, 3.7 Hz, 1H), 2.00 (dd, *J* = 13.4, 9.8 Hz, 1H), 1.48 (dd, *J* = 13.4, 3.7 Hz, 1H), 1.14 (d, *J* = 2.3 Hz, 12H), 0.89 (s, 9H). **<sup>13</sup>C NMR** (CDCl<sub>3</sub>, 125 MHz) δ ppm 146.5, 134.6, 128.5, 126.7, 104.3, 83.6,

65.5(7), 65.5(5), 46.9, 31.7, 29.9, 24.9, 24.7. **<sup>11</sup>B NMR** (CDCl<sub>3</sub>, 128.4 MHz) δ 32.9. **FT-IR** (cm<sup>-1</sup>, neat, ATR) 2952 (w), 1365 (s), 1322 (s), 1141 (vs) 1080 (s), 967 (m). **HRMS** (EI) calcd for C<sub>21</sub>H<sub>33</sub>BO<sub>4</sub> [M]<sup>+</sup>: 360.2472, found: 360.2484.

**2-(3-(3,3-Dimethyl-1-(4,4,5,5-tetramethyl-1,3,2-dioxaborolan-2-yl)butyl)phenyl)isoindoline-1,3-**

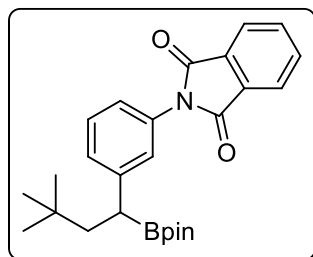

**dione, 28** (0.112 g, 52%) was prepared according to the general DCF procedure. The desired compound **28** was obtained as a crystalline, white solid (mp = 118-119 °C). **<sup>1</sup>H NMR** (CDCl<sub>3</sub>, 500 MHz) δ ppm 7.94 (dd, *J* = 5.3, 3.1 Hz, 2H), 7.78 (dd, *J* = 5.5, 3.1 Hz, 2H), 7.37 (t, *J* = 7.8 Hz, 1H), 7.26 - 7.30 (m, 2H), 7.17 (d, *J* = 7.9 Hz, 1H), 2.47 (dd, *J* = 10.0, 3.7 Hz, 1H), 2.02 (dd, *J* = 13.3, 10.1 Hz, 1H), 1.55 (dd, *J* = 13.3, 3.8 Hz, 1H), 1.17

(d, *J* = 3.7 Hz, 12H), 0.91 (s, 9H). **<sup>13</sup>C NMR** (CDCl<sub>3</sub>, 125 MHz) δ ppm 167.6, 146.3, 134.5, 132.2, 131.8, 129.2, 128.4, 126.9, 123.9, 123.7, 83.7, 46.6, 31.7, 30.0, 24.8, 24.7. **<sup>11</sup>B NMR** (CDCl<sub>3</sub>, 128.4 MHz) δ 33.6. **FT-IR** (cm<sup>-1</sup>, neat, ATR) 2951 (w), 1721 (vs), 1371 (s), 1322 (m), 1141 (m), 717 (m). **HRMS** (EI) calcd for C<sub>26</sub>H<sub>32</sub>BNO<sub>4</sub> [M]<sup>+</sup>: 433.2424, found: 433.2430.

### 7-(3,3-Dimethyl-1-(4,4,5,5-tetramethyl-1,3,2-dioxaborolan-2-yl)butyl)-1-methyl-5-phenyl-1H-

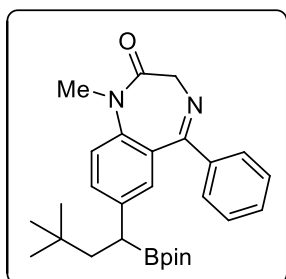

**benzo[e][1,4]diazepin-2(3H)-one, 30** (0.175 g, 76%) was prepared according to the general DCF procedure. The desired compound **30** was obtained as a dense, yellow oil. Compound **30** rapidly decomposed upon standing neat but is stable in solution;  $^1\text{H NMR}$  was therefore taken with residual chromatography solvent.  $^1\text{H NMR}$  ( $\text{CDCl}_3$ , 500 MHz)  $\delta$  ppm 7.61 (dd,  $J = 6.9, 4.8$  Hz, 2H), 7.34 - 7.47 (m, 4H), 7.22 (dd,  $J = 8.5, 3.8$  Hz, 1H), 7.14 (d,  $J = 1.8$  Hz, 1H), 4.77 (dd,  $J = 10.6, 2.1$  Hz, 1H), 3.76 (d,  $J = 10.7$  Hz, 1H), 3.35 - 3.40 (m, 3H), 2.33 - 2.41 (m, 1H), 1.88 - 1.98 (m, 1H), 1.44 (ddd,  $J = 18.3, 13.5, 4.3$  Hz, 1H), 1.09 - 1.16 (m, 12H), 0.86 (d,  $J = 10.7$  Hz, 9H).  $^{13}\text{C NMR}$  ( $\text{CDCl}_3$ , 125 MHz)  $\delta$  ppm 143.4, 142.6, 136.3, 135.9, 134.9, 134.8, 132.6, 131.9, 129.5, 122.2, 84.1, 46.8, 45.8, 36.0, 31.9, 31.7, 30.4, 29.9, 29.8, 24.9, 24.8(4), 24.7(6).  $^{11}\text{B NMR}$  ( $\text{CDCl}_3$ , 128.4 MHz)  $\delta$  33.3. **FT-IR** ( $\text{cm}^{-1}$ , neat, ATR) 2951 (w), 1680 (vs), 1321 (m), 1140 (m) 699 (w). **HRMS** (EI) calcd for  $\text{C}_{28}\text{H}_{37}\text{BN}_2\text{O}_3$   $[\text{M}]^+$ : 460.2897, found: 460.2884.

### Ethyl 8-(3,3-Dimethyl-1-(4,4,5,5-tetramethyl-1,3,2-dioxaborolan-2-yl)butyl)-5-methyl-6-oxo-5,6-

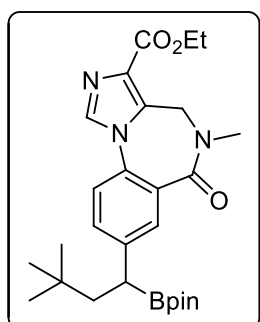

**dihydro-4H-benzo[f]imidazo[1,5-a][1,4]diazepine-3-carboxylate, 31** (0.219 g, 88%) was prepared according to the general DCF procedure. The desired compound **31** was obtained as a crystalline, white solid (mp = 132-133 °C).  $^1\text{H NMR}$  ( $\text{CDCl}_3$ , 500 MHz)  $\delta$  ppm 7.91 (br s, 1H), 7.85 (s, 1H), 7.50 (d,  $J = 7.8$  Hz, 1H), 7.28 (d,  $J = 8.2$  Hz, 1H), 5.23 - 5.03 (br s, 1H), 4.96 - 4.24 (m, 3H), 3.22 (s, 3H), 2.55 - 2.45 (m, 1H), 2.06 - 1.99 (m, 1H), 1.57 - 1.47 (m, 1H), 1.43 (t,  $J = 7.1$  Hz, 3H), 1.16 (s, 12H), 0.90 (s, 9H).  $^{13}\text{C NMR}$  ( $\text{CDCl}_3$ , 125 MHz)  $\delta$  ppm 167.0, 163.5, 146.5, 135.9, 135.2, 132.8, 132.3, 129.6, 129.1, 128.7, 128.6, 121.9, 83.9, 61.2, 42.7, 36.0, 31.8, 29.9, 24.9, 24.7, 14.7.  $^{11}\text{B NMR}$  ( $\text{CDCl}_3$ , 128.4 MHz)  $\delta$  33.3. **FT-IR** ( $\text{cm}^{-1}$ , neat, ATR) 2952 (m), 1366 (m), 1321 (m), 1147 (vs), 1020 (m). **HRMS** (ESI) calcd for  $\text{C}_{27}\text{H}_{39}\text{BN}_3\text{O}_5$   $[\text{M}+\text{H}]^+$ : 496.2983, found: 496.2960.

### 2-Chloro-5-(3,3-dimethyl-1-(4,4,5,5-tetramethyl-1,3,2-dioxaborolan-2-yl)butyl)nicotinonitrile, 32

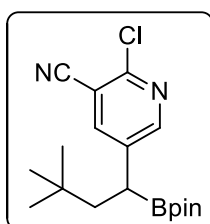

(0.127g, 73%) was prepared according to the general DCF procedure. The desired compound **32** was obtained as a crystalline, white solid (mp = 76-78 °C).  $^1\text{H NMR}$  ( $\text{CDCl}_3$ , 500 MHz)  $\delta$  8.42 (d,  $J = 2.3$  Hz, 1H), 7.85 (d,  $J = 2.4$  Hz, 1H), 2.44 (dd,  $J = 8.5, 4.7$  Hz, 1H), 1.99 (dd,  $J = 13.5, 8.9$  Hz, 1H), 1.43 (dd,  $J = 13.5, 4.8$  Hz, 1H), 1.16 (d,  $J = 4.6$  Hz, 12H), 0.89 (s, 9H).  $^{13}\text{C NMR}$  ( $\text{CDCl}_3$ , 125 MHz)  $\delta$  ppm 153.0,

149.4, 142.0, 140.7, 115.3, 110.4, 84.4, 46.4, 312.0, 29.9, 24.9, 24.8. **<sup>11</sup>B NMR** (CDCl<sub>3</sub>, 128.4 MHz) δ 32.5. **FT-IR** (cm<sup>-1</sup>, neat, ATR) 2950 (m), 12234 (w). 1355(s), 1352 (s), 1326 (s), 1139 (vs). **HRMS** (EI) calcd for C<sub>18</sub>H<sub>26</sub>BClN<sub>2</sub>O<sub>2</sub> [M]<sup>+</sup>: 348.1776, found: 348.1788.

**Methyl 5-(3,3-Dimethylbutyl)picolinate, 33** (0.046 g, 42%) was prepared according to the general DCF

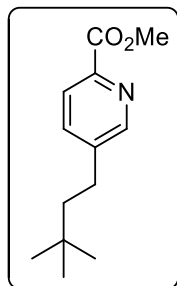

procedure. The desired compound **33** was obtained as a colorless oil. **<sup>1</sup>H NMR** (CDCl<sub>3</sub>, 500 MHz) δ ppm 8.54 (s, 1H), 8.04 (d, *J* = 7.9 Hz, 1H), 7.63 (dd, *J* = 8.0, 1.9 Hz, 1H), 3.98 (s, 3H), 2.59 - 2.67 (m, 2H), 1.45 - 1.53 (m, 2H), 0.96 (s, 9H). **<sup>13</sup>C NMR** (CDCl<sub>3</sub>, 125 MHz) δ ppm 166.1, 150.3, 145.8, 143.2, 136.8, 125.2, 53.0, 45.9, 30.9, 29.5, 28.8. **FT-IR** (cm<sup>-1</sup>, neat, ATR) 2987 (m), 1721 (vs) 1378 (m) 1256 (m), 936 (w). **HRMS** (ESI) calcd for C<sub>13</sub>H<sub>20</sub>NO<sub>2</sub> [M+H]<sup>+</sup>: 222.1494, found: 222.1497.

**5-(3,3-Dimethylbutyl)picolinonitrile, 34** (0.074 g, 79%) was prepared according to the general DCF

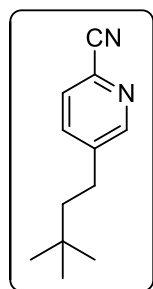

procedure. The desired compound **34** was obtained as a crystalline, white solid (mp = 65-67 °C). **<sup>1</sup>H NMR** (CDCl<sub>3</sub>, 500 MHz) δ ppm 8.54 (s, 1H), 7.59 - 7.65 (m, 2H), 2.61 - 2.69 (m, 2H), 1.45 - 1.53 (m, 2H), 0.98 (s, 9H). **<sup>13</sup>C NMR** (CDCl<sub>3</sub>, 125 MHz) δ ppm 151.7, 143.4, 136.7, 131.5, 128.4, 117.7, 45.8, 31.0, 29.5, 29.0. **FT-IR** (cm<sup>-1</sup>, neat, ATR) 2955 (s), 2235 (w), 1470 (s) 1366 (m). **HRMS** (ESI) calcd for C<sub>12</sub>H<sub>16</sub>N<sub>2</sub> [M]<sup>+</sup>: 188.1313, found: 188.1301.

**2-(1-(Benzo[b]thiophen-5-yl)-3,3-dimethylbutyl)-4,4,5,5-tetramethyl-1,3,2-dioxaborolane, 35** (0.105

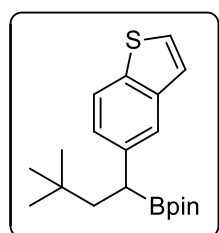

g, 61%) was prepared according to the general DCF procedure. The desired compound **35** was obtained as a powdery, white solid (mp = 143–144 °C). **<sup>1</sup>H NMR** (CDCl<sub>3</sub>, 500 MHz) δ ppm 7.74 (d, *J* = 8.4 Hz, 1H), 7.67 (s, 1H), 7.37 (d, *J* = 5.5 Hz, 1H), 7.24 (m, 2H), 2.50 (dd, *J* = 9.7, 3.3 Hz, 1H), 2.08 (dd, *J* = 12.5, 9.9 Hz, 1H), 1.55 (dd, *J* = 13.0, 3.1 Hz, 1H), 1.14 (d, *J* = 5.7 Hz, 12H), 0.92 (s, 9H). **<sup>13</sup>C NMR** (CDCl<sub>3</sub>, 125 MHz) δ ppm 141.3, 140.3, 136.9, 126.3, 125.6, 124.1, 123.0, 122.4, 83.5, 47.3, 31.7, 30.0, 24.9, 24.7. **<sup>11</sup>B NMR** (CDCl<sub>3</sub>, 128.4 MHz) δ ppm 33.0. **FT-IR** (cm<sup>-1</sup>, neat, ATR) 2954 (w), 1361 (s), 1330 (s), 1137 (vs), 967 (m), 837 (m), 702 (s). **HRMS** (EI) calcd for C<sub>20</sub>H<sub>30</sub>BO<sub>2</sub>S [M+H]<sup>+</sup>: 345.2060 found: 345.2066.

**(4-(3,3-Dimethyl-1-(4,4,5,5-tetramethyl-1,3,2-dioxaborolan-2-yl)butyl)phenyl)trimethylsilane, 36**

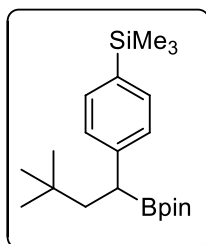

(0.162 g, 90%) was prepared according to the general DCF procedure. The desired compound **36** was obtained as a crystalline, white solid (mp = 89-90 °C). **<sup>1</sup>H NMR** (CDCl<sub>3</sub>, 500 MHz) δ ppm 7.38 (d, *J* = 7.8 Hz, 2H), 7.21 (d, *J* = 7.8 Hz, 2H), 2.37 (dd, *J* = 10.2, 3.1 Hz, 1H), 2.03 (dd, *J* = 13.3, 10.4 Hz, 1H), 1.47 (dd, *J* = 13.3, 3.2 Hz, 1H), 1.15 (d, *J* = 1.5 Hz, 12H), 0.90 (s, 9H), 0.23 (s, 9H). **<sup>13</sup>C NMR** (CDCl<sub>3</sub>, 125 MHz) δ ppm 145.8, 136.5, 133.6, 127.9, 83.5, 47.0, 31.6, 29.9, 24.9, 24.7, -0.7. **<sup>11</sup>B NMR** (CDCl<sub>3</sub>, 128.4 MHz) δ 21.2. **FT-IR** (cm<sup>-1</sup>, neat, ATR) 2953 (w), 1364 (m), 1315 (m), 1247 (m), 1142 (s), 1107 (m), 835 (vs). **HRMS** (EI) calcd for C<sub>21</sub>H<sub>37</sub>BO<sub>2</sub>Si [M]<sup>+</sup>: 360.2656, found: 360.2659.

**2-(4-(3,3-Dimethyl-1-(4,4,5,5-tetramethyl-1,3,2-dioxaborolan-2-yl)butyl)phenyl)-4,4,5,5-tetramethyl-1,3,2-dioxaborolane, 37**

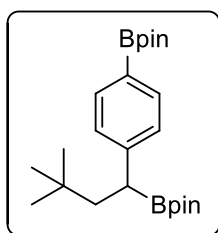

(0.144 g, 70%) was prepared according to the general DCF procedure. The desired compound **37** was obtained as a crystalline, white solid (mp = 137-139 °C). **<sup>1</sup>H NMR** (CDCl<sub>3</sub>, 500 MHz) δ ppm 7.68 (d, *J* = 7.6 Hz, 2H), 7.24 (d, *J* = 7.8 Hz, 2H), 2.37 - 2.44 (m, 1H), 1.96 - 2.05 (m, 1H), 1.50 (dd, *J* = 13.3, 3.5 Hz, 1H), 1.33 (s, 12H), 1.13 (s, 12H), 0.89 (s, 9H). **<sup>13</sup>C NMR** (CDCl<sub>3</sub>, 125 MHz) δ ppm 148.8, 135.1, 128.0, 83.8, 83.6, 46.6, 31.7, 30.0, 25.2, 25.1, 24.9, 24.7. **<sup>11</sup>B NMR** (CDCl<sub>3</sub>, 128.4 MHz) δ 31.4 (2 × B). **FT-IR** (cm<sup>-1</sup>, neat, ATR) 2978 (x), 2952 (vw), 1607 (w), 1358 (vs), 1319 (m), 1142 (s). **HRMS** (EI) calcd for C<sub>24</sub>H<sub>40</sub>B<sub>2</sub>O<sub>4</sub> [M]<sup>+</sup>: 414.3113, found: 414.3102.

**4-(3,3-Dimethyl-1-(4,4,5,5-tetramethyl-1,3,2-dioxaborolan-2-yl)butyl)phenyl trifluoromethanesulfonate, 38**

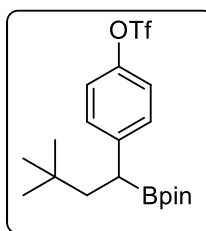

(0.140 g, 64%) was prepared according to the general DCF procedure. The desired compound **38** was obtained as a powdery, white solid (mp = 74-75 °C). **<sup>1</sup>H NMR** (CDCl<sub>3</sub>, 500 MHz) δ 7.28 (d, *J* = 7.9 Hz, 2H), 7.13 (d, *J* = 8.1 Hz, 2H), 2.43 (dd, *J* = 13.2, 3.5 Hz, 1H), 2.00 (dd, *J* = 13.0, 12.3 Hz, 1H), 1.47 (dd, *J* = 13.3, 3.4 Hz, 1H), 1.13 (s, 12H), 0.89 (s, 9H). **<sup>13</sup>C NMR** (CDCl<sub>3</sub>, 125 MHz) δ 147.5, 145.9, 130.0, 121.2, 119.0 (q, *C-F* *J* = 319.5 Hz, CF<sub>3</sub>), 83.8, 46.6, 31.7, 29.9, 24.8, 24.7. **<sup>19</sup>F NMR** (CDCl<sub>3</sub>, 471 MHz) -72.80 (s, 3F). **<sup>11</sup>B NMR** (CDCl<sub>3</sub>, 128.4 MHz) δ 33.3. **FT-IR** (cm<sup>-1</sup>, neat, ATR) 2977 (w), 1426 (m), 1202 (vs), 1134 (vs), 883 (s), 610 (s). **HRMS** (ESI) calcd for C<sub>19</sub>H<sub>28</sub>BF<sub>3</sub>O<sub>5</sub>S [M]<sup>+</sup>: 436.1703, found: 436.1711.

**2-(1-(4-Iodophenyl)-3,3-dimethylbutyl)-4,4,5,5-tetramethyl-1,3,2-dioxaborolane, 39** (0.132 g, 64%)

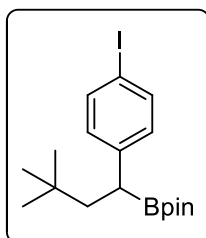

was prepared according to the general DCF procedure *with the following modifications*: 1,4-diiodobenzene (0.165 g, 0.500 mmol) was used. The desired compound **39** was obtained as a white crystalline solid (mp = 120-121 °C). **<sup>1</sup>H NMR** (CDCl<sub>3</sub>, 500 MHz) δ ppm 7.54 (d, *J* = 8.1 Hz, 2H), 6.98 (d, *J* = 8.2 Hz, 2H), 2.33 (dd, *J* = 9.5, 3.7 Hz, 1H), 1.97 (dd, *J* = 13.2, 9.8 Hz, 1H), 1.45 (dd, *J* = 13.3, 3.8 Hz, 1H), 1.14 (s, 12 H), 0.88 (s, 9 H). **<sup>13</sup>C NMR** (CDCl<sub>3</sub>, 125 MHz) 145.0, 137.5, 130.6, 90.2, 83.7, 46.6, 31.7, 29.9, 24.9, 24.7. **<sup>11</sup>B NMR** (CDCl<sub>3</sub>, 128.4 MHz) 32.5. **FT-IR** (cm<sup>-1</sup>, neat, ATR) 2955 (m), 1462 (m), 1380 (s), 1210 (s), 810 (m). **HRMS** (EI) calcd for C<sub>18</sub>H<sub>28</sub>BIO<sub>2</sub> [M<sup>+</sup>]: 414.1227, found: 414.1216.

**3-Methyl-3-(2-(4-(morpholinosulfonyl)phenyl)-2-(4,4,5,5-tetramethyl-1,3,2-dioxaborolan-2-yl)ethyl)cyclopentanone, 40** (0.155 g, 65%)

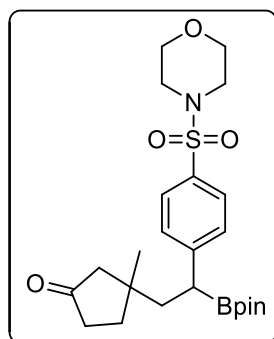

was prepared according to the general DCF procedure. The desired compound **40** was obtained as a crystalline, white solid (mp = 215-217 °C). The diastereomeric ratio was 1.4:1 as determined by <sup>1</sup>H NMR analysis of the crude reaction. **<sup>1</sup>H NMR** (CDCl<sub>3</sub>, 500 MHz) δ ppm 7.63 (d, *J* = 7.8 Hz, 2H), 7.39 (d, *J* = 8.9 Hz, 2H), 3.78 - 3.68 (m, 4H), 3.00 - 2.95 (m, 4H), 2.58 - 2.47 (m, 1H), 2.34 - 2.20 (m, 3H), 2.15 - 1.67 (m, 5H), 1.14 (d, *J* = 1.7 Hz, 12H), 1.06 (s, 3H). **<sup>13</sup>C NMR** (CDCl<sub>3</sub>, 125 MHz) δ ppm 219.4, 219.3, 150.5, 150.4, 132.3, 132.2, 129.0, 128.4, 84.3, 84.2, 66.4, 52.8, 52.8, 46.3, 44.0, 43.9, 40.7, 36.9, 36.8, 35.7, 35.7, 30.0, 25.4, 25.3, 24.9, 24.8, 24.7. **<sup>11</sup>B NMR** (CDCl<sub>3</sub>, 128.4 MHz) δ 32.3. **FT-IR** (cm<sup>-1</sup>, neat, ATR) 2976 (w), 2915 (w), 2855 (w), 1741 (s), 1344 (s), 1164 (vs). **HRMS** (ESI) calcd for C<sub>24</sub>H<sub>37</sub>BNO<sub>6</sub>S [M+H]<sup>+</sup>: 478.2435, found: 478.2422.

**1'-(2-(4-(Morpholinosulfonyl)phenyl)-2-(4,4,5,5-tetramethyl-1,3,2-dioxaborolan-2-yl)ethyl)-[1,1'-**

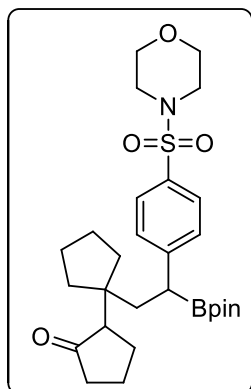

**bi(cyclopentan)]-2-one, 41** (0.092 g, 35%) was prepared according to the general DCF procedure *with the following modification*: The reaction was run for 48 h. The desired compound **41** was obtained as a crystalline, white solid (mp = 141-143 °C). The diastereomeric ratio was 2.2:1 as determined by <sup>1</sup>H NMR analysis of the crude reaction. **<sup>1</sup>H NMR** (CDCl<sub>3</sub>, 500 MHz) δ ppm 7.61 (d, *J* = 8.1 Hz, 2H), 7.39 (d, *J* = 8.7 Hz, 2H), 3.77 - 3.69 (m, 4H), 3.01 - 2.93 (m, 4H), 2.49 - 2.41 (m, 1H), 2.36 - 2.12 (m, 3H), 2.12 - 1.88 (m, 4H), 1.81 - 1.31 (m, 10H), 1.14 (d, *J* = 2.0 Hz, 12H). **<sup>13</sup>C NMR** (CDCl<sub>3</sub>, 125 MHz) δ ppm 220.8, 220.6, 151.2, 131.9, 129.2, 129.1, 128.2, 128.2, 84.0, 66.4, 54.4, 54.2, 48.2, 48.2, 46.3, 41.0, 40.8, 39.1, 36.0, 35.5, 35.4, 34.7, 27.6, 27.0, 25.2, 25.1, 25.1, 25.0, 24.9, 24.8, 24.6, 20.5. **<sup>11</sup>B NMR** (CDCl<sub>3</sub>, 128.4 MHz) δ 33.2. **FT-IR** (cm<sup>-1</sup>, neat,

ATR) 2952 (m), 2870 (w), 1719 (s), 979 (m). **HRMS** (ESI) calcd for  $C_{28}H_{43}BNO_6S$   $[M+H]^+$ : 532.2904, found: 532.2888.

**3,5-Dimethyl-3-(2-(4-(morpholinofonyl)phenyl)-2-(4,4,5,5-tetramethyl-1,3,2-dioxaborolan-2-**

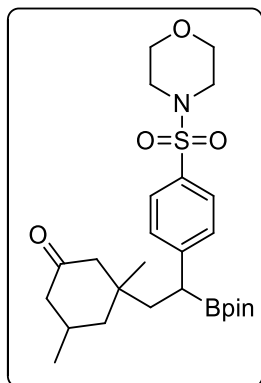

**yl)ethyl)cyclohexanone, 42** (0.174 g, 69%) was prepared according to the general DCF procedure. The desired compound **42** was obtained as a crystalline, white solid (mp = 208-209 °C). The diastereomeric ratio was 5:3:1 determined by  $^1H$  NMR analysis of the crude reaction.  $^1H$  NMR ( $CDCl_3$ , 500 MHz)  $\delta$  ppm 7.61 (d,  $J$  = 8.6 Hz, 2H), 7.37 (dd,  $J$  = 13.9, 8.2 Hz, 2H), 3.73 (t,  $J$  = 3.9 Hz, 4H), 3.00 - 2.94 (m, 4H), 2.72 - 2.40 (m, 1H), 2.37 - 2.26 (m, 1H), 2.21 - 1.82 (m, 5H), 1.79 - 1.55 (m, 2H), 1.55 - 1.31 (m, 1H), 1.13 (d,  $J$  = 7.2 Hz, 12H), 1.01 (t,  $J$  = 6.3 Hz, 3H), 0.96 - 0.87 (m, 3H).  $^{13}C$  NMR ( $CDCl_3$ , 125 MHz)  $\delta$  ppm

211.5, 211.4, 150.7, 150.6, 132.1, 129.3, 129.2, 129.1, 129.0, 128.4, 128.3, 128.3, 84.2, 84.1, 66.4, 66.4, 53.3, 53.0, 49.7, 49.4, 47.2, 46.4, 46.3, 46.3, 45.5, 40.2, 39.3, 39.2, 29.7, 29.1, 29.0, 24.9, 24.8, 24.8, 24.7, 24.6, 23.8, 22.8.  $^{11}B$  NMR ( $CDCl_3$ , 128.4 MHz)  $\delta$  33.0. **FT-IR** ( $cm^{-1}$ , neat, ATR) 2958 (m), 1710 (m), 1348 (s), 1153 (vs) **HRMS** (EI) calcd for  $C_{26}H_{40}BNO_6S$   $[M]^+$ : 505.2669, found: 505.2667.

**4-(Adamantan-1-yl)-1-(4,4,5,5-tetramethyl-1,3,2-dioxaborolan-2-yl)ethyl)phenyl)sulfonyl)**

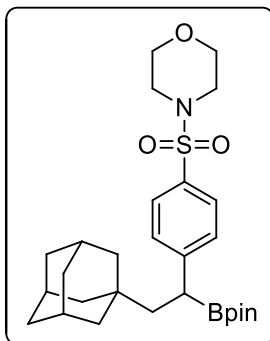

**morpholine, 43** (0.230 g, 89%) was prepared according to the general DCF procedure. The desired compound **43** was obtained as a crystalline, white solid (mp = 219-220 °C).  $^1H$  NMR ( $CDCl_3$ , 500 MHz)  $\delta$  ppm 7.61 (d,  $J$  = 8.2 Hz, 2H), 7.39 (d,  $J$  = 8.2 Hz, 2H), 3.73 (t,  $J$  = 4.6 Hz, 4H), 2.97 (t,  $J$  = 4.3 Hz, 4H), 2.55 (dd,  $J$  = 9.6, 3.8 Hz, 1H), 1.97 - 1.85 (m, 4H), 1.72 - 1.58 (m, 6H), 1.55 - 1.40 (m, 6H), 1.38 (dd,  $J$  = 13.4, 3.8 Hz, 1H), 1.13 (d,  $J$  = 1.8 Hz, 12H)  $^{13}C$  NMR ( $CDCl_3$ , 125 MHz)  $\delta$  ppm 151.8, 131.6, 129.1, 128.1, 83.9, 66.4, 46.9,

46.3, 42.9, 37.4, 33.6, 29.0, 24.8, 24.7.  $^{11}B$  NMR ( $CDCl_3$ , 128.4 MHz)  $\delta$  32.8. **FT-IR** ( $cm^{-1}$ , neat, ATR) 2900 (m), 2847 (w), 1344 (m), 1163 (s), 1114 (m), 945 (m). **HRMS** (ESI) calcd for  $C_{28}H_{43}BNO_5S$   $[M+H]^+$ : 516.2955, found: 516.2964.

#### 4-((4-(2-(4-Pentylbicyclo[2.2.2]octan-1-yl)-1-(4,4,5,5-tetramethyl-1,3,2-dioxaborolan-2-

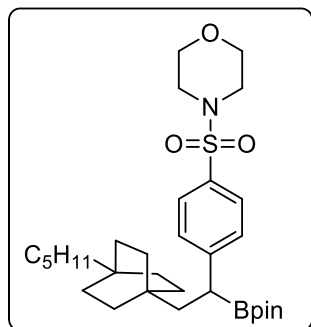

yl)ethyl)phenyl)sulfonyl)morpholine, **44** (0.220 g, 79%) was prepared according to the general DCF procedure *with the following modification*: The reaction was run for 48 h. The desired compound **44** was obtained as a crystalline, white solid (mp = 199-200 °C). <sup>1</sup>H NMR (CDCl<sub>3</sub>, 500 MHz) δ 7.60 (d, *J* = 8.2 Hz, 2H), 7.37 (d, *J* = 8.2 Hz, 2H), 3.73 (t, *J* = 4.3 Hz, 4H), 3.00 - 2.92 (m, 4H), 2.49 (dd, *J* = 9.5, 3.7 Hz, 1H), 1.91 (dd, *J* = 13.4, 9.8 Hz, 1H), 1.43 - 1.35 (m, 4H), 1.35 - 1.24 (m, 12H), 1.20 - 1.15 (m, 3H), 1.13 (s, 12H), 1.04 - 0.99 (m, 2H), 0.86 (t, *J* = 7.2 Hz, 3H). <sup>13</sup>C NMR (CDCl<sub>3</sub>, 125 MHz) δ ppm 151.7, 131.6, 129.0, 128.1, 83.9, 66.4, 46.3, 44.1, 42.0, 33.2, 32.1, 31.8, 31.5, 30.8, 24.8, 24.7, 23.6, 23.0, 14.4. <sup>11</sup>B NMR (CDCl<sub>3</sub>, 128.4 MHz) δ 33.6. FT-IR (cm<sup>-1</sup>, neat, ATR) 2926 (m), 1454 (w), 1352 (s), 1165 (vs), 945 (m). HRMS (ESI) calcd for C<sub>31</sub>H<sub>51</sub>BNO<sub>5</sub>S [M+H]<sup>+</sup>: 560.3581, found: 560.3568.

#### 4-((4-(2-(1-Methylcyclohexyl)-1-(4,4,5,5-tetramethyl-1,3,2-dioxaborolan-2-

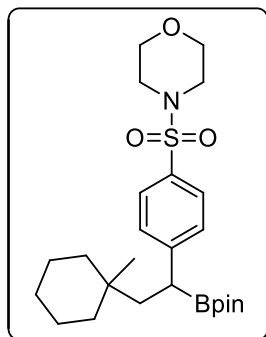

yl)ethyl)phenyl)sulfonyl)morpholine, **45** (0.155g, 65%) was prepared according to the general DCF procedure. The desired compound **45** was obtained as a crystalline, white solid (mp = 185-187 °C). <sup>1</sup>H NMR (CDCl<sub>3</sub>, 500 MHz) δ ppm 7.61 (d, *J* = 8.2 Hz, 2H), 7.41 (d, *J* = 8.2 Hz, 2H), 3.77 -3.69 (m, 4H), 3.03 - 2.92 (m, 4H), 2.52 (dd, *J* = 9.5, 3.7 Hz, 1H), 2.03 (dd, *J* = 13.4, 9.6 Hz, 1H), 1.55 (dd, *J* = 13.5, 3.9 Hz, 1H), 1.52 - 1.35 (m, 5H), 1.31 - 1.19 (m, 5H), 1.13 (d, *J* = 4.6 Hz, 12H), 0.88 (s, 3H). <sup>13</sup>C NMR (CDCl<sub>3</sub>, 125 MHz) δ ppm 151.9, 131.6, 129.1, 128.2, 83.9, 66.4, 46.3, 38.3, 38.2, 34.1, 26.7, 24.8, 24.6, 22.4, 22.3. <sup>11</sup>B NMR (CDCl<sub>3</sub>, 128.4 MHz) δ 33.8. FT-IR (cm<sup>-1</sup>, neat, ATR) 2945 (m), 1455 (w), 1346 (s), 1169 (vs), 710 (vs). HRMS (ESI) calcd for C<sub>25</sub>H<sub>41</sub>BNO<sub>5</sub>S [M+H]<sup>+</sup>: 478.2799, found: 478.2808.

#### 4-((4-(2-(3-Isopropyl-1-methylcyclopentyl)-1-(4,4,5,5-tetramethyl-1,3,2-dioxaborolan-2-yl)ethyl)

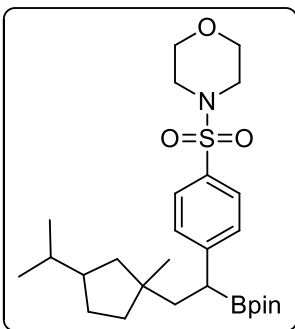

phenyl)sulfonyl) Morpholine, **46** (0.205 g, 81%) was prepared according to the general DCF procedure. The desired compound **46** was obtained as a crystalline, white solid (mp = 127-128 °C). The diastereomeric ratio was 1.2:1.1:1.1:1 as determined by <sup>1</sup>H NMR analysis of the crude reaction. <sup>1</sup>H NMR (CDCl<sub>3</sub>, 500 MHz) δ ppm 7.61 (d, *J* = 7.9 Hz, 2H), 7.40 (d, *J* = 8.7 Hz, 2H), 3.73 (t, *J* = 4.5 Hz, 4H), 3.02 - 2.91 (m, 4H), 2.54 - 2.46 (m, 1H), 2.18 - 2.06 (m, 1H), 1.82 - 1.18 (m, 9H), 1.14 (s, 12H), 0.98 - 0.92 (m, 3H), 0.87 -

0.78 (m, 6H). **<sup>13</sup>C NMR** (CDCl<sub>3</sub>, 125 MHz) δ ppm 151.8, 151.7, 151.6, 131.7, 129.1, 128.2, 128.1, 83.9, 66.4, 47.5, 47.5, 46.7, 46.4, 46.3, 45.9, 45.9, 45.6, 45.4, 45.2, 45.0, 44.7, 44.4, 43.4, 43.4, 43.0, 40.6, 39.8, 39.7, 39.2, 34.4, 34.4, 34.3, 34.2, 30.4, 30.1, 30.0, 29.8, 29.6, 28.3, 28.1, 26.8. **<sup>11</sup>B NMR** (CDCl<sub>3</sub>, 128.4 MHz) δ 34.0. **FT-IR** (cm<sup>-1</sup>, neat, ATR) 2952 (m), 1366 (m), 1321 (m), 1147 (vs), 1020 (m). **HRMS** (EI) calcd for C<sub>27</sub>H<sub>44</sub>BNO<sub>5</sub>S [M]<sup>+</sup>: 505.3033, found: 505.3027.

**Ethyl 3,3-Dimethyl-5-(4-(morpholinosulfonyl)phenyl)-5-(4,4,5,5-tetramethyl-1,3,2-dioxaborolan-2-**

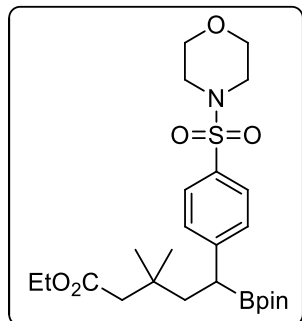

**yl)pentanoate, 47** (0.172 g, 68%) was prepared according to the general DCF procedure. The desired compound **47** was obtained as a crystalline, white solid (mp = 92-94 °C). **<sup>1</sup>H NMR** (CDCl<sub>3</sub>, 500 MHz) δ ppm 7.62 (d, *J* = 8.2 Hz, 2H), 7.40 (d, *J* = 8.4 Hz, 2H), 4.08 (q, *J* = 7.1 Hz, 2H), 3.73 (t, *J* = 4.7 Hz, 4H), 2.97 (t, *J* = 4.4 Hz, 4H), 2.53 (dd, *J* = 9.2, 4.1 Hz, 1H), 2.21 (d, *J* = 2.1 Hz, 2H), 2.12 (dd, *J* = 13.6, 9.3 Hz, 1H), 1.69 (dd, *J* = 13.6, 4.3 Hz, 1H), 1.20 (t, *J* = 7.1 Hz, 3H), 1.13 (s, 12H), 1.01 (d, *J* = 8.2 Hz, 6H). **<sup>13</sup>C**

**NMR** (CDCl<sub>3</sub>, 125 MHz) δ ppm 172.2, 151.0, 131.9, 129.1, 128.2, 84.0, 66.4, 60.2, 46.6, 46.3, 44.4, 34.6, 27.8, 27.4, 24.8, 24.7, 14.6. **<sup>11</sup>B NMR** (CDCl<sub>3</sub>, 128.4 MHz) δ 32.7. **FT-IR** (cm<sup>-1</sup>, neat, ATR) 2986 (m), 1732 (s) 1360 (m) 1218 (vs) 903 (m). **HRMS** (ESI) calcd for C<sub>25</sub>H<sub>40</sub>BNO<sub>7</sub>S [M+Na]<sup>+</sup>: 532.2521, found: 532.2548.

**4,4-Dimethyl-6-(4-(morpholinosulfonyl)phenyl)-6-(4,4,5,5-tetramethyl-1,3,2-dioxaborolan-2-**

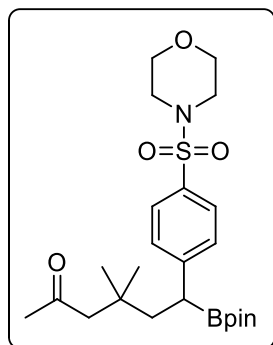

**yl)hexan-2-one, 48** (0.186 g, 78%) was prepared according to the general DCF procedure. The desired compound **48** was obtained as a crystalline, white solid (mp = 133-135 °C). **<sup>1</sup>H NMR** (CDCl<sub>3</sub>, 500 MHz) δ ppm 7.62 (d, *J* = 8.4 Hz, 2H), 7.39 (d, *J* = 8.2 Hz, 2H), 3.76 - 3.70 (m, 4H), 3.01 - 2.93 (m, 4H), 2.49 (dd, *J* = 8.9, 4.7 Hz, 1H), 2.33 (d, *J* = 4.7 Hz, 2H), 2.11 - 2.05 (m, 4H), 1.75 (dd, *J* = 13.5, 4.7 Hz, 1H), 1.13 (s, 12H), 1.02 (s, 3H), 0.99 (s, 3H). **<sup>13</sup>C NMR**

(CDCl<sub>3</sub>, 125 MHz) δ ppm 208.6, 151.0, 132.0, 129.1, 128.2, 84.1, 66.4, 54.4, 46.3, 44.3, 34.8, 32.8, 27.7, 27.4, 24.8, 24.7. **<sup>11</sup>B NMR** (CDCl<sub>3</sub>, 128.4 MHz) δ 33.3. **FT-IR** (cm<sup>-1</sup>, neat, ATR) 2975 (m), 1342 (s), 1152 (vs), 944 (s), 571 (m). **HRMS** (ESI) calcd for C<sub>24</sub>H<sub>39</sub>BNO<sub>6</sub>S [M+H]<sup>+</sup>: 480.2591, found: 480.2583.



**4-((4-(6-(2,5-Dimethylphenoxy)-3,3-dimethyl-1-(4,4,5,5-tetramethyl-1,3,2-dioxaborolan-2-yl)hexyl)**

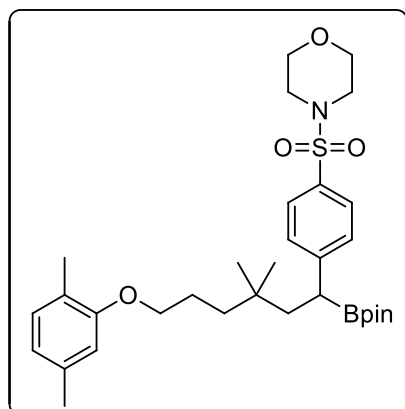

**phenyl)sulfonyl)morpholine, 49** (0.186 g, 64%) was prepared according to the general DCF procedure. The desired compound **49** was obtained as a crystalline, white solid (mp = 99-100 °C). **<sup>1</sup>H NMR** (CDCl<sub>3</sub>, 500 MHz) δ ppm 7.61 (d, *J* = 8.2 Hz, 2H), 7.40 (d, *J* = 8.2 Hz, 2H), 7.00 (d, *J* = 7.3 Hz, 1H), 6.65 (d, *J* = 7.5 Hz, 1H), 6.60 (s, 1H), 3.89 (t, *J* = 6.4 Hz, 2H), 3.73 (t, *J* = 4.6 Hz, 4H), 2.97 (t, *J* = 4.6 Hz, 4H), 2.51 (dd, *J* = 9.4, 3.7 Hz, 1H), 2.30 (s, 3H), 2.18 (s, 3H), 2.07 (dd, *J* = 13.4, 9.5 Hz, 1H), 1.72 (dd, *J* = 14.2, 7.6 Hz, 2H), 1.57 (dd, *J* = 13.5, 3.9 Hz, 1H), 1.40 (t, *J* = 8.5 Hz, 2H), 1.13

(s, 12H), 0.91 (s, 6H). **<sup>13</sup>C NMR** (CDCl<sub>3</sub>, 125 MHz) δ ppm 157.3, 151.6, 136.8, 131.8, 130.6, 129.1, 128.2, 123.8, 120.9, 84.0, 68.8, 66.4, 46.3, 44.4, 38.8, 34.0, 27.5, 27.4, 24.8, 24.7, 24.6, 21.7, 16.1. **<sup>11</sup>B NMR** (CDCl<sub>3</sub>, 128.4 MHz) δ 33.0. **FT-IR** (cm<sup>-1</sup>, neat, ATR) 2956 (w), 2924 (w), 1351 (m), 1262 (m), 1165 (s), 945 (m). **HRMS** (EI) calcd for C<sub>32</sub>H<sub>48</sub>BNO<sub>6</sub>S [M]<sup>+</sup>: 608.3295, found: 608.3204.

**tert-Butyl 2-(4-Cyanophenyl)-4,4-dimethylpentanoate, 50** (0.068 g, 47%) was prepared according to

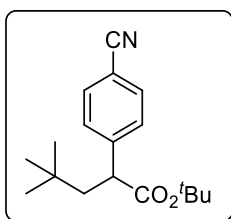

the general DCF procedure *with the following modification*: *tert*-Butyl acrylate (0.077 g, 0.60 mmol, 1.2 equiv) was used in place of vinylBpin. The desired compound **50** was obtained as a crystalline, white solid (mp = 84-85 °C). **<sup>1</sup>H NMR** (CDCl<sub>3</sub>, 500 MHz) δ ppm 7.59 (d, *J* = 7.5 Hz, 2H), 7.41 (d, *J* = 7.9 Hz, 2H), 3.57 (dd, *J* = 8.9, 3.4 Hz, 1H), 2.26 (dd, *J* = 14.1, 9.0 Hz, 1H), 1.47 (dd, *J* = 13.9, 3.3

Hz, 1H), 1.37 (s, 9H), 0.90 (s, 9H). **<sup>13</sup>C NMR** (CDCl<sub>3</sub>, 125 MHz) δ ppm 172.9, 147.2, 132.6, 128.8, 119.1, 111.0, 81.4, 49.8, 47.2, 31.4, 29.7, 28.0. **FT-IR** (cm<sup>-1</sup>, neat, ATR) 2954 (w), 2228 (w), 1722 (m), 1365 (m), 1141 (s), 839 (m), 564 (m). **HRMS** (EI) calcd for C<sub>14</sub>H<sub>25</sub>NO<sub>2</sub> [M-C<sub>4</sub>H<sub>8</sub>]<sup>+</sup>: 231.1259, found: 231.1265.

**tert-Butyl 2-(2-Cyanopyridin-4-yl)-4,4-dimethylpentanoate, 51** (0.82 g, 57%) was prepared according

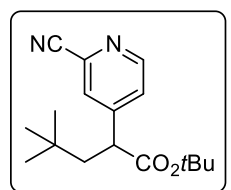

to the general DCF procedure *with the following modification*: *tert*-butyl acrylate (0.077 g, 0.60 mmol, 1.2 equiv) was used in place of vinylBpin. The desired compound **51** was obtained as a white solid (mp = 77 – 79 °C). **<sup>1</sup>H NMR** (CDCl<sub>3</sub>, 500 MHz) δ ppm 8.64 (d, *J* = 1.7 Hz, 1H), 7.80 (dd, *J* = 8.0, 2.2 Hz, 1H), 7.64 (d, *J*

= 8.1 Hz, 1H), 3.62 (dd, *J* = 8.9, 4.0 Hz, 1H), 2.28 (dd, *J* = 14.0, 8.8 Hz, 1H), 1.48 (dd, *J* = 14.0, 4.0 Hz, 1H) 1.38 (s, 9H), 0.91 (s, 9H). **<sup>13</sup>C NMR** (CDCl<sub>3</sub>, 125 MHz) δ 172.3, 151.2, 141.5, 136.1, 132.6, 128.6,

117.5, 82.1, 47.3, 31.5, 29.7, 28.1. **FT-IR** ( $\text{cm}^{-1}$ , neat, ATR) 2958 (m), 2236 (w), 1727 (s) 1368 (m), 1144 (vs), 857 (w). **HRMS** (EI) calcd for  $\text{C}_{13}\text{H}_{15}\text{N}_2\text{O}_2$  [ $\text{M}-t\text{Bu}$ ] $^+$ : 232.1221, found: 232.1222.

**Methyl 2-(4-Cyanophenyl)-3-(1-methylcyclohexyl)propanoate, 52** (0.129 g, 91%) was prepared

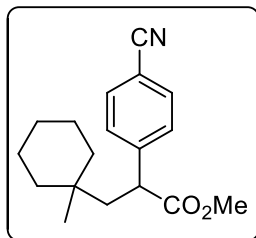

according to the general DCF procedure *with the following modification*. Methyl acrylate (0.057 g, 0.60 mmol, 1.2 equiv) was used in place of vinylBpin. The desired compound **52** was obtained as a colorless, dense oil.  **$^1\text{H NMR}$**  ( $\text{CDCl}_3$ , 500 MHz)  $\delta$  ppm 7.59 (d,  $J = 8.2$  Hz, 2H), 7.44 (d,  $J = 8.2$  Hz, 2H), 3.73 (dd,  $J = 8.7, 4.0$  Hz, 1H), 3.65 (s, 3H), 2.29 (dd,  $J = 14.2, 8.7$  Hz, 1H), 1.58 (dd,  $J = 14.1, 3.9$  Hz, 1H), 1.48 - 1.36 (m, 5H), 1.28 - 1.21 (m, 4H), 1.21 - 1.14 (m, 1H), 0.85 (s, 3H).  **$^{13}\text{C NMR}$**  ( $\text{CDCl}_3$ , 125 MHz)  $\delta$  ppm 174.6, 146.7, 132.7, 129.0, 119.0, 111.3, 52.6, 47.5, 38.1, 38.0, 33.8, 26.5, 22.1. **FT-IR** ( $\text{cm}^{-1}$ , neat, ATR) 2925 (m), 2229 (w), 1735 (s), 1210 (m), 1158 (s), 836 (w). **HRMS** (ESI) calcd for  $\text{C}_{18}\text{H}_{23}\text{NO}_2$  [ $\text{M}$ ] $^+$ : 285.1729, found: 285.1736.

**4-(1-Cyano-3,3-dimethyl-5-oxohexyl)benzotrile 53** (0.113 g, 89%) was prepared according to the

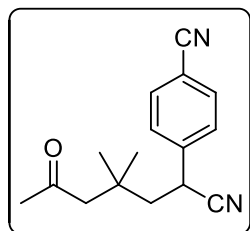

general DCF procedure *with the following modification*: Acrylonitrile (0.039 g, 0.60 mmol, 1.2 equiv) was used in place of vinylBpin. The desired compound **53** was obtained as an off-white wax.  **$^1\text{H NMR}$**  ( $\text{CDCl}_3$ , 500 MHz)  $\delta$  ppm 7.68 (d,  $J = 8.1$  Hz, 2H), 7.51 (d,  $J = 8.1$  Hz, 2H), 3.92 (dd,  $J = 11.1, 3.4$  Hz, 1H), 2.66 - 2.59 (m, 1H), 2.47 (d,  $J = 16.5$  Hz, 1H), 2.22 - 2.12 (m, 4H), 1.89 (dd,  $J = 14.2, 3.4$  Hz, 1H), 1.19 (s, 3H), 1.12 (s, 3H).  **$^{13}\text{C NMR}$**  ( $\text{CDCl}_3$ , 125 MHz)  $\delta$  ppm 208.6, 151.0, 132.0, 129.1, 128.2, 84.1, 66.4, 54.4, 46.3, 44.3, 34.8, 32.8, 27.7, 27.4, 24.8, 24.7. **FT-IR** ( $\text{cm}^{-1}$ , neat, ATR) 2959 (m), 2230 (m), 1711 (s), 1325 (vs), 835 (s), 576 (s). **HRMS** (EI) calcd for  $\text{C}_{16}\text{H}_{18}\text{N}_2\text{O}$  [ $\text{M}$ ] $^+$ : 254.1419, found: 254.1427.

**Ethyl 2-(4-Cyanophenyl)-4,4-dimethyl-6-oxoheptanoate, 54** (0.133 g, 88%) was prepared according to

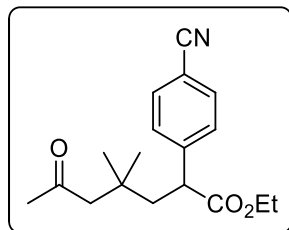

the general DCF procedure *with the following modification*. Ethyl acrylate (0.060 g, 0.60 mmol, 1.2 equiv) was used in place of vinylBpin. The desired compound **54** was obtained as a colorless oil.  **$^1\text{H NMR}$**  ( $\text{CDCl}_3$ , 500 MHz)  $\delta$  ppm 7.59 (d,  $J = 8.2$  Hz, 2H), 7.44 (d,  $J = 8.1$  Hz, 2H), 4.17 - 4.02 (m, 2H), 3.69 (dd,  $J = 8.9, 4.0$  Hz, 1H), 2.39 - 2.28 (m, 3H), 2.07 (s, 3H), 1.81 (dd,  $J = 14.1, 4.0$  Hz, 1H), 1.20 (t,  $J = 7.1$  Hz, 3H), 1.00 (s, 3H), 0.98 (s, 3H).  **$^{13}\text{C NMR}$**  ( $\text{CDCl}_3$ , 125 MHz)  $\delta$  ppm 208.2, 173.7, 146.1, 132.7, 129.0, 119.0, 111.4, 61.6, 53.9, 48.4, 45.0, 34.2, 32.6, 27.7, 27.5,

14.3. **FT-IR** ( $\text{cm}^{-1}$ , neat, ATR) 2960 (m), 1728 (vs), 1366 (m), 1152 (vs), 1020 (m). **HRMS** (EI) calcd for  $\text{C}_{18}\text{H}_{23}\text{NO}_3$  [ $\text{M}$ ] $^+$ : 301.1678, found: 301.1687.

**4-(2-Cyclohexyl-1-(4,4,5,5-tetramethyl-1,3,2-dioxaborolan-2-yl)ethyl) Benzonitrile, 55** (0.068 g,

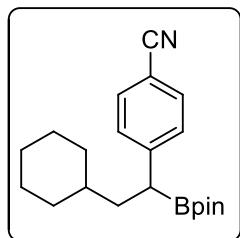

40%) was prepared according to the general DCF procedure *with the following modifications*:  $\text{NiBr}_2(\text{phen})$  (10 mg, 0.05 mmol, 5 mol%) was used in place of  $\text{NiBr}_2(\text{bpy})$ . An excess of vinylBpin was used (0.231 g, 1.50 mmol, 3.0 equiv). The desired compound **55** was obtained as a crystalline, white solid (mp = 96-98 °C).

**$^1\text{H NMR}$**  ( $\text{CDCl}_3$ , 500 MHz)  $\delta$  7.53 (d,  $J$  = 8.1 Hz, 2H), 7.29 (d,  $J$  = 8.2 Hz, 2H), 2.52 (t,  $J$  = 8.1 Hz, 1H), 1.77 - 1.55 (m, 7H), 1.27 - 1.03 (m, 16H), 0.93 - 0.80 (m, 2H) ppm.  **$^{13}\text{C NMR}$**  ( $\text{CDCl}_3$ , 125 MHz)  $\delta$  150.1, 132.3, 129.3, 119.7, 109.1, 83.9, 39.6, 36.8, 33.9, 33.1, 26.8, 26.5, 26.5, 24.8, 24.8 ppm.  **$^{11}\text{B NMR}$**  ( $\text{CDCl}_3$ , 128.4 MHz)  $\delta$  32.1 **FT-IR** ( $\text{cm}^{-1}$ , neat, ATR) 2921 (s), 2226 (m), 1606 (m), 1380 (vs), 1140 (s), 851 (m) **HRMS** (EI) calcd for  $\text{C}_{21}\text{H}_{30}\text{BNO}_2$  [ $\text{M}^+$ ]: 339.2370, found: 339.2370.

**4-(3-Methyl-1-(4,4,5,5-tetramethyl-1,3,2-dioxaborolan-2-yl)pentyl) Benzonitrile, 56** (0.089 g, 57%)

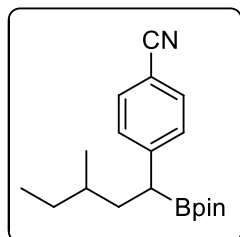

was prepared according to the General Procedure *with the following modifications*:  $\text{NiBr}_2(\text{phen})$  (10 mg, 0.05 mmol, 5 mol %) was used in place of  $\text{NiBr}_2(\text{bpy})$ . An excess of vinylBpin was used (0.231 g, 1.50 mmol, 3.0 equiv). The desired compound **56** was obtained as a dense oil that solidified after standing overnight in a refrigerator (mp = 44-45 °C). The diastereomeric ratio was 1.1:1 as

determined by  $^1\text{H NMR}$  analysis of the crude reaction.  **$^1\text{H NMR}$**  ( $\text{CDCl}_3$ , 500 MHz)  $\delta$  7.53 (d,  $J$  = 8.1 Hz, 2H), 7.30 (d,  $J$  = 8.5 Hz, 2H), 2.52 - 2.48 (m, 1H), 1.91 - 1.69 (m, 1H), 1.62 - 1.42 (m, 1H), 1.41 - 1.23 (m, 2H), 1.20 - 1.13 (m, 13H), 0.87 - 0.79 (m, 6H).  **$^{13}\text{C NMR}$**  ( $\text{CDCl}_3$ , 125 MHz)  $\delta$  150.3, 150.0, 132.3, 129.3, 129.3, 119.6, 109.1, 83.9, 39.3, 38.6, 33.9, 33.3, 29.9, 29.3, 24.9, 24.8, 24.8, 19.7, 18.9, 11.5, 11.5 ppm.  **$^{11}\text{B NMR}$**  ( $\text{CDCl}_3$ , 128.4 MHz)  $\delta$  31.5 **FT-IR** ( $\text{cm}^{-1}$ , neat, ATR) 2961 (w), 2226 (w), 1462 (w), 1370 (s), 1326 (vs), 852 (m). **HRMS** (EI) calcd for  $\text{C}_{19}\text{H}_{28}\text{BNO}_2$  [ $\text{M}^+$ ]: 313.2213, found: 313.2220.

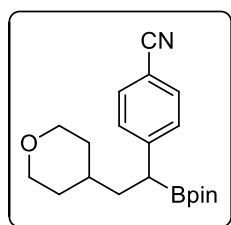

**4-(2-(Tetrahydro-2H-pyran-4-yl)-1-(4,4,5,5-tetramethyl-1,3,2-dioxaborolan-2-yl)ethyl) benzonitrile, 57** (0.092 g, 54%) was prepared according to the general DCF procedure *with the following modifications*:  $\text{Ni}(\text{phen})\text{Br}_2$  (10 mg, 0.05 mmol, 5 mol %) was used in place of  $\text{Ni}(\text{bpy})\text{Br}_2$ . An excess of vinylBpin was used (0.231 g, 1.50 mmol, 3.0 equiv). The desired compound **57** was obtained as a colorless

oil.  **$^1\text{H NMR}$**  ( $\text{CDCl}_3$ , 500 MHz)  $\delta$  ppm 7.54 (d,  $J$ =8.2 Hz, 2H), 7.30 (d,  $J$  = 8.2 Hz, 2H), 3.92 (td,  $J$  =

11.2, 2.6 Hz, 2H), 3.27 (tt,  $J = 11.9, 2.6$  Hz, 2H), 2.52 (t,  $J = 8.1$  Hz, 1H), 1.80-1.74 (m, 1H), 1.69 (dd,  $J = 8.5, 5.6$  Hz, 1H), 1.62 (d,  $J = 13.0$  Hz, 1H), 1.52 (d,  $J = 12.4$  Hz, 1H), 1.39-1.32 (m, 1H), 1.30-1.23 (m, 2H), 1.18 (d,  $J = 4.7$  Hz, 12H)  $^{13}\text{C NMR}$  ( $\text{CDCl}_3$ , 125 MHz) 149.5, 132.5, 129.3, 119.5, 109.4, 84.1, 68.2, 39.0, 34.2, 33.7, 32.8, 24.8.  $^{11}\text{B NMR}$  ( $\text{CDCl}_3$ , 128.4 MHz)  $\delta$  32.5. **FT-IR** ( $\text{cm}^{-1}$ , neat, ATR) 2977 (m), 2926 (m), 2226 (w), 1371 (m), 1324 (m), 1140 (s). **HRMS** (EI) calcd for  $\text{C}_{20}\text{H}_{28}\text{BNO}_3$  [ $\text{M}^+$ ]: 341.2162, found: 341.2172.

**tert-Butyl-4-(2-(4-cyanophenyl)-2-(4,4,5,5-tetramethyl-1,3,2-dioxaborolan-2-yl)ethyl)piperidine-1-**

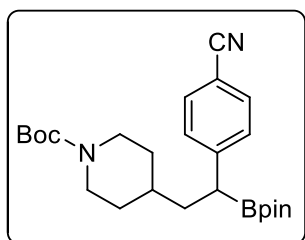

**carboxylate, 58** (0.112 g, 51%) was prepared according to the general DCF procedure *with the following modifications*: Ni(phen)Br<sub>2</sub> (10 mg, 0.05 mmol, 5 mol %) was used in place of Ni(bpy)Br<sub>2</sub>. An excess of vinylBpin was used (0.231 g, 1.50 mmol, 3.0 equiv). The desired compound **58** was obtained as a colorless oil.  $^1\text{H NMR}$  ( $\text{CDCl}_3$ , 500 MHz)  $\delta$  ppm 7.54 (d,  $J = 8.2$  Hz, 2H),

7.29 (d,  $J = 8.2$  Hz, 2H), 4.02 (br. s, 2H), 2.58 (br. s, 2H), 2.52 (t,  $J = 8.1$  Hz, 1H), 1.79-1.72 (m, 1H), 1.71-1.62 (m, 2H), 1.58 (s, 1H), 1.44 (s, 9H), 1.17 (d,  $J = 4.9$  Hz, 12H), 1.07 (t,  $J = 13.6$  Hz, 2H).  $^{13}\text{C NMR}$  ( $\text{CDCl}_3$ , 125 MHz) 155.1, 149.5, 132.5, 129.2, 119.5, 109.4, 84.1, 79.5, 38.6, 35.2, 28.7, 24.9.  $^{11}\text{B NMR}$  ( $\text{CDCl}_3$ , 128.4 MHz)  $\delta$  32.8. **FT-IR** ( $\text{cm}^{-1}$ , neat, ATR) 2977 (m), 2926 (m), 2226 (w), 1689 (vs), 1365 (s), 1165 (m), 1142 (m). **HRMS** (EI) calcd for  $\text{C}_{20}\text{H}_{28}\text{BN}_2\text{O}_2$  [ $\text{M}^+ - \text{Boc}$ ]: 339.2244, found: 339.2231.

**4-(2-(2-Methylcyclopentyl)-1-(4,4,5,5-tetramethyl-1,3,2-dioxaborolan-2-yl)ethyl) Benzonitrile, 59**

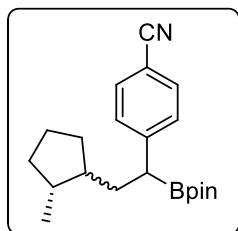

(0.090 g, 53%) was prepared according to the general DCF procedure *with the following modifications*: Ni(phen)Br<sub>2</sub> (10 mg, 0.05 mmol, 5 mol %) was used in place of Ni(bpy)Br<sub>2</sub>. An excess of vinylBpin was used (0.231 g, 1.50 mmol, 3.0 equiv). The desired compound **59** was obtained as a colorless oil. The diastereomeric ratio was 1.5:1 as determined by  $^1\text{H NMR}$  analysis of the crude

reaction.  $^1\text{H NMR}$  ( $\text{CDCl}_3$ , 500 MHz)  $\delta$  ppm 7.53 (d,  $J = 8.1$  Hz, 2H), 7.29 (d,  $J = 8.1$  Hz, 2H), 2.44 (dd,  $J = 9.9, 5.8$  Hz, 1H), 1.98 - 1.90 (m, 1H), 1.79 - 1.73 (m, 2H), 1.61 - 1.55 (m, 1H), 1.52 - 1.48 (m, 2H), 1.39 (pent,  $J = 7.5$  Hz, 1H), 1.29 - 1.24 (m, 2H), 1.18 (m, 13H), 0.87 (d,  $J = 6.6$  Hz, 3H).  $^{13}\text{C NMR}$  ( $\text{CDCl}_3$ , 125 MHz). 149.8, 132.4, 129.3, 119.6, 109.1, 83.9, 46.3, 40.8, 36.6, 35.0, 32.1, 24.9, 24.8, 23.6, 19.4.  $^{11}\text{B NMR}$  ( $\text{CDCl}_3$ , 128.4 MHz)  $\delta$  33.2. **FT-IR** ( $\text{cm}^{-1}$ , neat, ATR). 2987 (m), 2221 (w), 1390 (m), 1120 (m), 871 (m). **HRMS** (EI) calcd for  $\text{C}_{24}\text{H}_{31}\text{NO}_2$  [ $\text{M}^+$ ]: 365.2355, found: 365.2363.

#### 4-(2-(Bicyclo[2.2.1]heptan-2-yl)-1-(4,4,5,5-tetramethyl-1,3,2-dioxaborolan-2-yl)ethyl) Benzonitrile, **60**

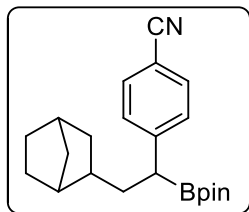

**60** (0.087 g, 50%) was prepared according to the general DCF procedure *with the following modifications*: Ni(phen)Br<sub>2</sub> (10 mg, 0.05 mmol, 5 mol %) was used in place of Ni(bpy)Br<sub>2</sub>. An excess of vinylBpin was used (0.231 g, 1.50 mmol, 3.0 equiv). The desired compound **60** was obtained as crystalline solid (mp = 69-71 °C). The diastereomeric ratio was 1.2:1 as determined by <sup>1</sup>H NMR analysis of the crude reaction. <sup>1</sup>H NMR (CDCl<sub>3</sub>, 500 MHz) δ ppm 7.53 (dd, *J* = 8.4, 1.8 Hz, 2H), 7.29 (dd, *J* = 8.2, 1.6 Hz, 2H), 2.43 (q, *J* = 7.3 Hz, 1H), 2.19 – 2.13 (m, 1H), 2.03 - 1.86 (m, 1H), 1.85 – 1.62 (m, 1H) 1.45 - 1.40 (m, 2H), 1.36 - 1.22 (m, 4H), 1.20 - 1.15 (m, 12H), 1.10 - 1.00 (m, 4H). <sup>13</sup>C NMR (CDCl<sub>3</sub>, 125 MHz) δ ppm 150.1, 149.9, 132.3, 129.5, 129.4, 119.7, 109.1, 83.9, 41.5, 41.4, 41.3, 40.9, 39.3, 39.0, 38.6, 38.0, 36.8, 35.6, 35.5, 30.3, 30.3, 29.0, 24.8. <sup>11</sup>B NMR (CDCl<sub>3</sub>, 128.4 MHz) δ 32.4. FT-IR (cm<sup>-1</sup>, neat, ATR) 2947 (m), 2227 (w), 1353 (m), 1327 (m), 1142 (s), 850 (m). HRMS (EI) calcd for C<sub>22</sub>H<sub>30</sub>BNO<sub>2</sub> [M<sup>+</sup>]: 351.2370, found: 351.2398.

#### 4,8,8-Trimethyl-4-(2-(4-(morpholinosulfonyl)phenyl)-2-(4,4,5,5-tetramethyl-1,3,2-dioxaborolan-2-yl)ethyl)-6-(4,4,5,5-tetramethyl-1,3,2-dioxaborolan-2-yl)bicyclo[3.3.1]nonan-2-one, **61**

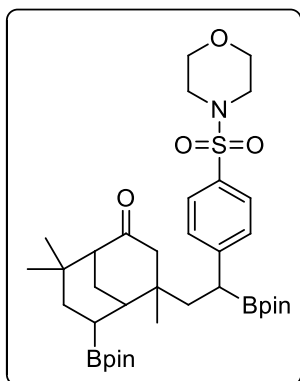

**61** (0.137 g, 40%) was prepared according to the general DCF procedure *with the following modification*: 2.5 equiv of vinylboronic acid pinacol ester were used. The desired compound **61** was obtained as a crystalline, white solid (mp = 120-121 °C). The diastereomeric ratio was 5.8:1.8:1.3:1 as determined by HPLC analysis of the isolated material. <sup>1</sup>H NMR (CDCl<sub>3</sub>, 500 MHz) δ ppm 7.60 (d, *J* = 8.2 Hz, 2H), 7.37 (d, *J* = 8.2 Hz, 2H), 3.76 - 3.71 (m, 4H), 3.00 - 2.94 (m, 4H), 2.48 (dd, *J* = 7.9, 4.7 Hz, 1H), 2.35 - 2.15 (m, 2H), 2.07 - 1.64 (m, 7H), 1.51 - 1.40 (m, 2H), 1.25 (d, *J* = 6.6 Hz, 12H), 1.13 (d, *J* = 4.3 Hz, 12H), 1.07 (s, 3H), 1.03 (s, 3H), 0.81 (s, 3H). <sup>13</sup>C NMR (CDCl<sub>3</sub>, 125 MHz) δ ppm 214.1, 150.9, 131.9, 129.2, 128.3, 84.1, 83.5, 66.4, 57.4, 55.0, 46.4, 44.6, 42.6, 35.6, 35.4, 31.6, 29.7, 29.6, 27.8, 27.0, 25.3, 25.2, 24.9, 24.7. <sup>11</sup>B NMR (CDCl<sub>3</sub>, 128.4 MHz) δ 34.9. FT-IR (cm<sup>-1</sup>, neat, ATR) 2978 (w), 1793 (s), 1361 (vs), 1143 (vs), 1138 (vs), 935 (m). HRMS (EI) calcd for C<sub>36</sub>H<sub>58</sub>B<sub>2</sub>NO<sub>8</sub>S [M+H]<sup>+</sup>: 686.4069, found: 686.3861.

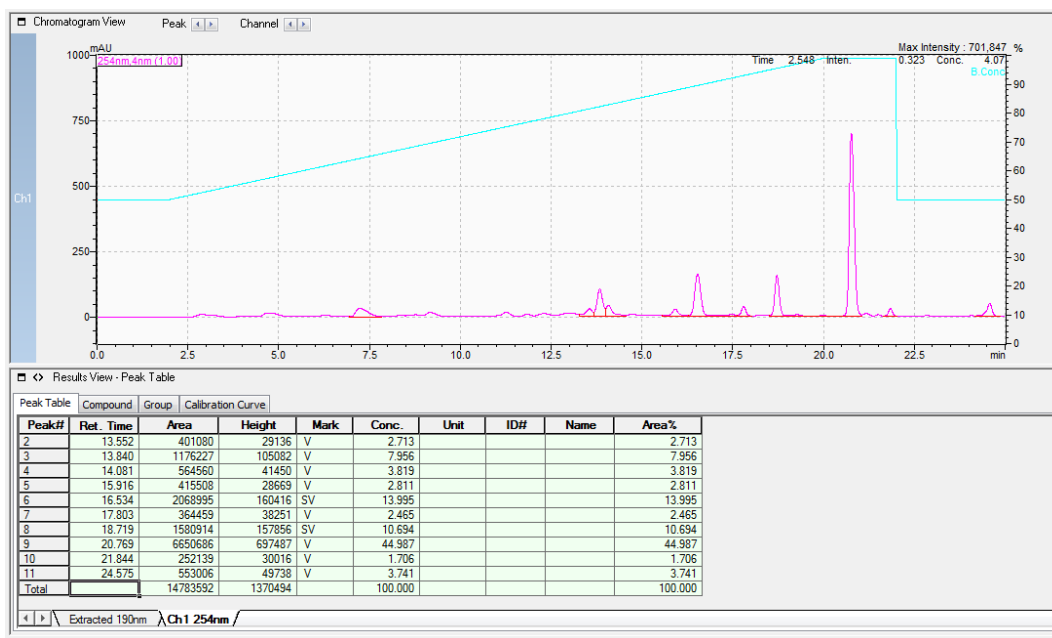

#### 4-((4-((4-Methyl-4-phenethyl-2-(4,4,5,5-tetramethyl-1,3,2-dioxaborolan-2-yl)cyclopentyl)methyl)

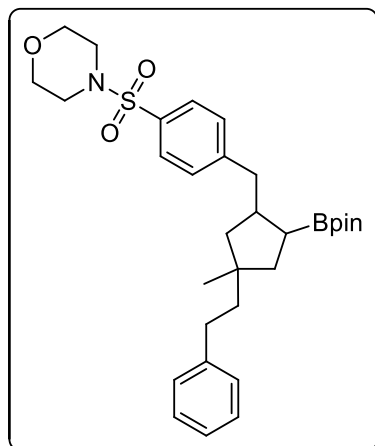

**phenyl)sulfonyl) Morpholine, 62** (0.197 g, 71%) was prepared according to the general DCF procedure. The desired compound **62** was obtained as a crystalline, white solid (mp = 101-103 °C). The diastereomeric ratio was 2.5:1.5:1 as determined by <sup>1</sup>H NMR analysis of the crude reaction. <sup>1</sup>H NMR (CDCl<sub>3</sub>, 500 MHz) δ ppm 7.64 (d, *J* = 8.2 Hz, 2H), 7.34 (d, *J* = 7.9 Hz, 2H), 7.29 - 7.22 (m, 2H), 7.20 - 7.12 (m, 3H), 3.77- 3.70 (m, 4H), 3.07 - 2.94 (m, 4H), 2.64 - 2.46 (m, 4H), 1.81 - 1.73 (m, 1H), 1.72 - 1.63 (m, 2H), 1.59 (dd, *J* = 11.9, 8.4 Hz, 1H), 1.55 (s, 2H), 1.53 - 1.47 (m, 1H), 1.29 - 1.23 (m, 13H), 1.14 and 0.98 (s, 3H total). <sup>13</sup>C NMR (CDCl<sub>3</sub>, 125 MHz) δ ppm 148.8, 148.7,

143.8, 132.5, 129.8, 128.6, 128.6, 128.2, 125.8, 125.8, 83.4, 66.4, 46.6, 46.4, 46.3, 46.2, 44.0, 43.0, 42.8, 42.5, 42.1, 41.7, 41.3, 40.9, 40.6, 32.5, 31.8, 27.6, 26.0, 25.9, 25.3, 25.2. <sup>11</sup>B NMR (CDCl<sub>3</sub>, 128.4 MHz) δ 34.1. FT-IR (cm<sup>-1</sup>, neat, ATR) 2927 (w), 1371 (m), 1349 (s), 1165 (vs), 1113 (s), 942 (m). HRMS (EI) calcd for C<sub>31</sub>H<sub>44</sub>BNO<sub>5</sub>SNa [M+Na]<sup>+</sup>: 576.2931, found: 576.2958.

**2-(3,3-Dimethyl-1-(4-(3-methylbut-2-en-1-yl)phenyl)butyl)-4,4,5,5-tetramethyl-1,3,2-dioxaborolane, 63** (0.120 g, 66%) was prepared according to the general DCF procedure. The desired compound **63** was obtained as a colorless oil. <sup>1</sup>H NMR (CDCl<sub>3</sub>, 500 MHz) δ ppm 7.13 (d, *J* = 8.1 Hz, 2H), 7.04 (d, *J* = 7.9 Hz, 2H), 5.31 (dt, *J* = 7.3, 1.4 Hz, 2H), 3.28 (d, *J* = 7.2, 2H), 2.35 (dd, *J* = 10.2, 3.4 Hz, 1H), 2.01 (dd, *J* =

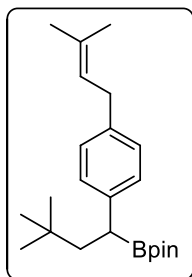

13.3, 10.2 Hz, 1H), 1.74 (s, 3H), 1.71 (s, 3H), 1.45 (dd,  $J = 13.4, 3.4$  Hz, 1H), 1.15 (d,  $J = 2.4$  Hz, 12H), 0.90 (s, 9H).  $^{13}\text{C NMR}$  ( $\text{CDCl}_3$ , 125 MHz) 142.4, 138.5, 132.4, 128.5, 128.4, 123.9, 83.4, 47.2, 34.2, 31.6, 29.9, 26.0, 24.9, 24.7, 18.1.  $^{11}\text{B NMR}$  ( $\text{CDCl}_3$ , 128.4 MHz) 32.7. **FT-IR** ( $\text{cm}^{-1}$ , neat, ATR) 2953 (m), 1364 (s), 1318 (s), 1142 (vs), 863 (m). **HRMS** (EI) calcd for  $\text{C}_{23}\text{H}_{37}\text{BO}_2$  [ $\text{M}^+$ ]: 356.2887, found: 356.2908.

**Pent-4-en-1-yl-2-(4-cyanophenyl)-4,4-dimethylpentanoate, 64** (0.122 g, 82%) was prepared according

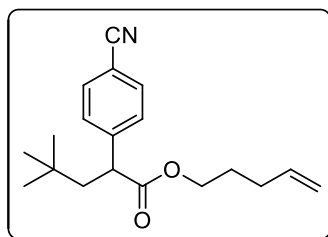

to the general DCF procedure *with the following modifications*: Pent-4-en-1-yl acrylate (0.084 g, 0.600 mmol) was used in place of vinylBpin. The desired compound **64** was obtained as a colorless oil.  $^1\text{H NMR}$  ( $\text{CDCl}_3$ , 500 MHz)  $\delta$  ppm 7.59 (d,  $J = 8.2$  Hz, 2H), 7.44 (d,  $J = 8.2$  Hz, 2H), 5.77 - 5.66 (m, 1H), 4.95 (s, 1H), 4.93 (d,  $J = 4.7$  Hz, 1H), 4.11 - 3.97 (m, 2H), 3.69 (dd,  $J = 8.9, 4.0$  Hz, 1H), 2.29 (dd,  $J = 14.0, 9.0$  Hz, 1H), 2.01 (q,  $J = 7.1$  Hz, 2H), 1.70 - 1.62 (m, 2H), 1.54 (dd,  $J = 14.0, 4.0$  Hz, 1H), 0.89 (s, 9H).  $^{13}\text{C NMR}$  ( $\text{CDCl}_3$ , 125 MHz) 173.9, 146.6, 137.4, 132.7, 129.0, 119.0, 115.7, 111.3, 64.9, 48.8, 47.4, 31.4, 30.2, 29.7, 27.9. **FT-IR** ( $\text{cm}^{-1}$ , neat, ATR) 2969 (m), 1486 (s), 1010 (s), 807 (s). **HRMS** (EI) calcd for  $\text{C}_{19}\text{H}_{25}\text{NO}_2$  [ $\text{M}^+$ ]: 299.1885, found: 299.1897.

**(R)-6-Methyl-2-((S)-4-methylcyclohex-3-en-1-yl)hept-5-en-2-yl-2-(4-cyanophenyl)-4,4-dimethyl**

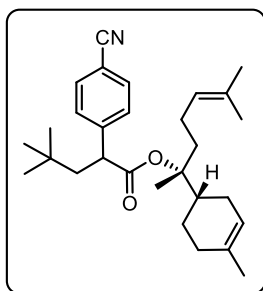

**pentanoate, 65** (0.089 g, 41%) was prepared according to the general DCF procedure *with the following modifications*: (S)-6-methyl-2-((S)-4-methylcyclohex-3-en-1-yl)hept-5-en-2-ol (0.123 g, 0.600 mmol) was used in place of vinylBpin. The desired compound **65** was obtained as colorless oil.  $^1\text{H NMR}$  ( $\text{CDCl}_3$ , 500 MHz)  $\delta$  ppm 7.59 (d,  $J = 7.8$  Hz, 2H), 7.42 (d,  $J = 7.9$  Hz, 2H), 5.33 - 5.23 (m, 1H), 4.99 - 4.89 (m, 1H), 3.60 (dd,  $J = 7.1, 4.0$  Hz, 2H), 2.28 (dd,  $J = 13.9, 8.2$  Hz, 1H), 2.08 - 1.86 (m, 4H), 1.80 - 1.71 (m, 4H), 1.67 - 1.61 (m, 8H), 1.57 - 1.51 (m, 2H), 1.50 - 1.41 (m, 3 H), 1.30 (d,  $J = 19.5$  Hz, 3 H), 0.89 (s, 9 H).  $^{13}\text{C NMR}$  ( $\text{CDCl}_3$ , 125 MHz)  $\delta$  ppm 172.8, 172.6, 147.4, 147.4, 134.5, 134.3, 132.6, 132.0, 129.1, 124.1, 124.0, 120.4, 119.1, 111.1, 88.3, 50.0, 50.0, 46.8, 46.7, 40.8, 40.6, 35.8, 35.7, 31.4, 31.1, 29.8, 26.5, 26.4, 25.9, 25.9, 24.0, 23.8, 23.6, 22.1, 22.0, 20.6, 20.5, 17.8, 17.7. **FT-IR** ( $\text{cm}^{-1}$ , neat, ATR) 2958 (m), 2229 (w), 1726 (vs), 1210 (m), 1151 (vs), 835 (m). **HRMS** (EI) calcd for  $\text{C}_{15}\text{H}_{24}$  [ $\text{M}^+ - \text{C}_{14}\text{H}_{17}\text{NO}_2^+$ ]: 204.1878, found: 204.1883.

**((S)-4-(Prop-1-en-2-yl)cyclohex-1-en-1-yl)methyl-2-(4-cyanophenyl)-4,4-dimethylpentanoate, 66**

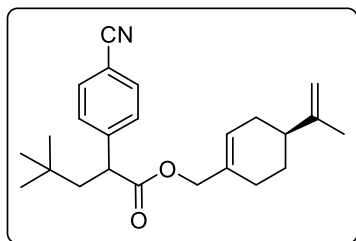

(0.089 g, 41%) was prepared according to the general DCF procedure with the following modifications: (S)-4-(prop-1-en-2-yl)cyclohex-1-en-1-yl)methyl acrylate (0.124 g, 0.600 mmol) was used in place of vinylBpin. The desired compound **66** was obtained as colorless oil.  $^1\text{H NMR}$  ( $\text{CDCl}_3$ , 500 MHz)  $\delta$  ppm 7.59 (d,  $J = 8.2$  Hz, 2H), 7.44 (dd,  $J = 8.2, 1.4$  Hz, 2H), 5.67 (br. s, 1H), 4.70 (d,  $J = 16.5$  Hz, 2H), 4.49 - 4.36 (m, 2H), 3.71 (dd,  $J = 8.9, 4.0$  Hz, 1H), 2.30 (dd,  $J = 14.0, 8.9$  Hz, 1H), 2.16 - 2.05 (br. s, 2H), 1.97 - 1.88 (m, 3H), 1.83 - 1.75 (m, 1H), 1.72 (s, 3H), 1.55 (dd,  $J = 14.0, 4.0$  Hz, 1H), 1.46 - 1.35 (m, 1H), 0.89 (s, 9H).  $^{13}\text{C NMR}$  ( $\text{CDCl}_3$ , 125 MHz)  $\delta$  ppm 173.8, 173.8, 149.6, 146.5, 132.7, 132.4, 129.0, 126.7, 126.7, 119.0, 111.3, 109.1, 69.5, 48.8, 48.8, 47.4, 47.4, 40.9, 31.4, 30.7, 29.6, 27.4, 27.4, 26.6, 26.6, 21.0. FT-IR ( $\text{cm}^{-1}$ , neat, ATR) 2954 (m), 2229 (w), 1733 (s), 1147 (vs), 837 (m), 737 (vs). HRMS (EI) calcd for  $\text{C}_{24}\text{H}_{31}\text{NO}_2$  [ $\text{M}^+$ ]: 365.2355, found: 365.2363.

**(3S,8S,9S,10R,13R,14S,17R)-10,13-Dimethyl-17-((R)-6-methylheptan-2-yl)-2,3,4,7,8,9,10,11,**

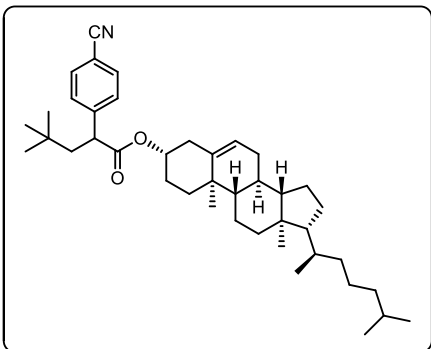

**12,13,14,15,16,17-tetradecahydro-1H-cyclopenta**

**[a]phenanthren-3-yl**

**2-(4-Cyanophenyl)-4,4-**

**dimethylpentanoate, 67** (0.125 g, 42%) was prepared according

to the general DCF procedure with the following modifications: cholesteryl acrylate (0.265 g, 0.600 mmol) was used in place of vinylBpin. The desired compound **67** was obtained as a white powdery solid (mp = 136-138 °C).  $^1\text{H NMR}$  ( $\text{CDCl}_3$ , 500 MHz)  $\delta$  ppm 7.59 (dd,  $J=8.3, 1.8$  Hz, 2H), 7.43 (d,  $J=7.9$  Hz, 2H), 5.38 - 5.28 (m, 1H), 4.60 - 4.52 (m, 1H), 3.65 (dd,  $J=9.1, 3.6$  Hz, 1H), 2.33 - 2.26 (m, 2H), 2.24 - 2.10 (m, 1H), 2.02 - 1.91 (m, 2H), 1.87 - 1.64 (m, 3H), 1.60 - 1.40 (m, 8H), 1.39 - 1.06 (m, 11H), 1.03 - 0.95 (m, 5H), 0.93 - 0.88 (m, 13H), 0.86 (dd,  $J=6.6, 2.1$  Hz, 6H), 0.66 (s, 3H).  $^{13}\text{C NMR}$  ( $\text{CDCl}_3$ , 125 MHz)  $\delta$  ppm 173.3, 146.8, 139.6, 139.6, 132.6, 128.9, 123.2, 123.1, 119.0, 111.2, 75.0, 56.9, 56.4, 50.3, 49.0, 47.5, 42.6, 40.0, 39.8, 38.1, 38.0, 37.2, 37.1, 36.8, 36.5, 36.0, 32.2, 32.1, 32.1, 32.1, 31.4, 29.7, 28.5, 28.3, 27.8, 27.7, 24.5, 24.1, 23.1, 22.8, 21.3, 19.6, 19.0, 12.1. FT-IR ( $\text{cm}^{-1}$ , neat, ATR) 2948 (s), 2229 (w), 1732 (s), 1467 (w), 1154 (m), 839 (vw). HRMS (EI) calcd for  $\text{C}_{27}\text{H}_{44}$  [ $\text{M} - \text{C}_{14}\text{H}_{17}\text{NO}_2^+$ ]: 368.3443, found: 368.3429.



**2-((1S,5R)-6,6-Dimethylbicyclo[3.1.1]hept-2-en-3-yl)ethyl-2-(4-cyanophenyl)-4,4-**

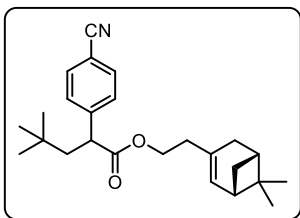

**dimethylpentanoate, 68** (0.110 g, 58%) was prepared according to the general DCF procedure *with the following modifications*: 2-((1S)-6,6-dimethylbicyclo[3.1.1]hept-2-en-2-yl)ethyl acrylate (0.132 g, 0.600 mmol) was used in place of vinylBpin. The desired compound **68** was obtained as a colorless oil. <sup>1</sup>H NMR (CDCl<sub>3</sub>, 500 MHz) δ ppm 7.59 (dd, *J* = 8.3, 1.4 Hz,

2H), 7.43 (d, *J* = 7.9 Hz, 2H), 5.15 (dd, *J* = 19.0, 1.3 Hz, 1H), 4.12 – 4.05 (m, 1H), 4.05 – 3.98 (m, 1H), 3.67 (dd, *J* = 8.6, 4.2 Hz, 1H), 2.34 - 2.25 (m, 2H), 2.24 - 2.11 (m, 4H), 2.05 (br. s, 1H), 1.99 - 1.94 (m, 1H), 1.57 - 1.52 (m, 1H), 1.23 (s, 3H), 1.04 (dd, *J* = 17.2, 8.5 Hz, 1H), 0.88 (d, *J* = 0.9 Hz, 9H), 0.74 (d, *J* = 16.8 Hz, 3H). <sup>13</sup>C NMR (CDCl<sub>3</sub>, 125 MHz) 173.9, 173.8, 146.6, 144.0, 132.7, 129.1, 119.2, 119.1, 119.0, 111.3, 63.6, 48.8, 47.4, 47.3, 45.9, 45.9, 40.9, 38.2, 38.2, 36.0, 31.9, 31.6, 31.4, 29.7, 26.5, 21.4, 21.3 FT-IR (cm<sup>-1</sup>, neat, ATR) 2952 (w), 2914 (w), 2229 (w), 1732 (s), 1149 (vs), 837 (m). HRMS (EI) calcd for C<sub>24</sub>H<sub>31</sub>NO<sub>2</sub> [M<sup>+</sup>]: 365.2355, found: 365.2363.

## Procedure for Scale-up of Dicarbofunctionalization

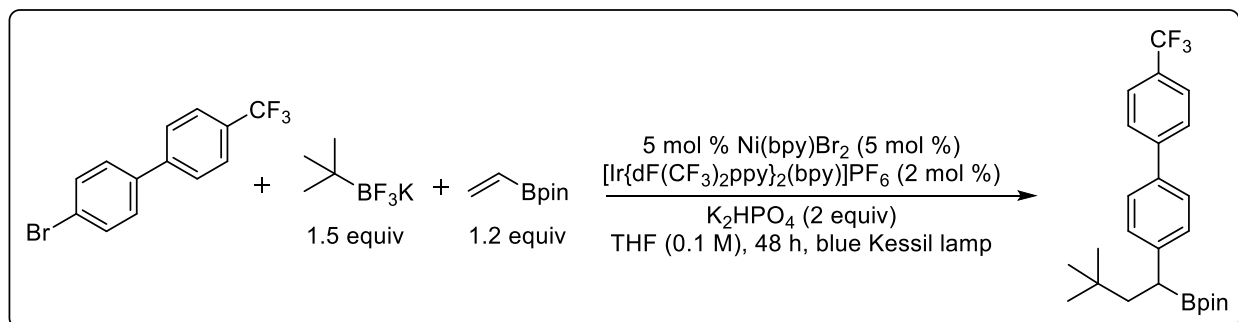

To a 100 mL Schlenk tube (dimensions: height = 15 cm, diameter = 4 cm) equipped with a stirrer bar was added *t*BuBF<sub>3</sub>K (1.230 g, 7.50 mmol, 1.5 equiv), 4-bromo-4'-(trifluoromethyl)-1,1'-biphenyl (1.506 g, 5.00 mmol, 1 equiv), K<sub>2</sub>HPO<sub>4</sub> (1.742 g, 10.0 mmol, 2 equiv), anhyd NiBr<sub>2</sub>(bpy) (0.094 g, 0.25 mmol, 5 mol %), and [Ir{dF(CF<sub>3</sub>)<sub>2</sub>ppy}<sub>2</sub>(bpy)]PF<sub>6</sub> (0.101 g, 0.1 mmol, 2 mol %). The top of the vessel was sealed with a rubber septum, and the reaction was evacuated and backfilled with argon three times. The tube was charged with vinylboronic acid pinacol ester (0.924 g, 6.00 mmol, 1.2 equiv) dissolved in degassed THF (50 mL) via a syringe. The side-arm was closed, and the septum was sealed with Parafilm<sup>®</sup>. The tube was placed in front of two Kessil<sup>®</sup> H150 Blue lamps (24VDC, 1.5A, 30W) approximately 6 in away from the tube and irradiated for 48 h. The reaction was maintained at rt via air cooling by a clip fan. Below are pictures of the reaction set-up.

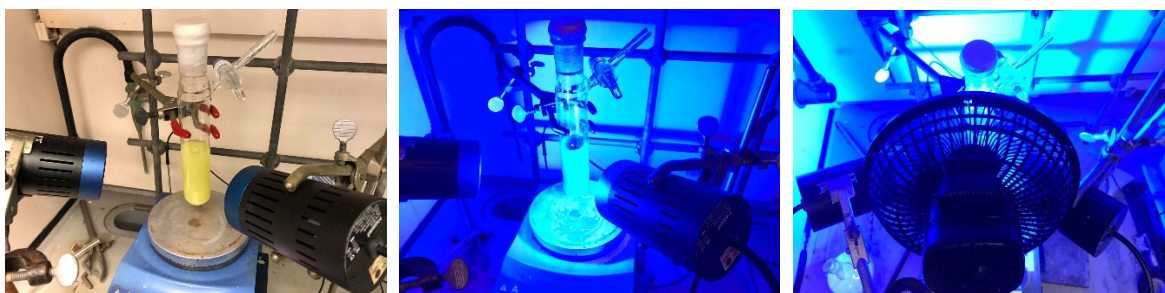

After confirmation that the reaction was complete by TLC, the crude reaction was filtered through a pad of Celite<sup>®</sup>, eluting with CH<sub>2</sub>Cl<sub>2</sub>. The filtrate was concentrated by rotary evaporation. The resulting light orange solid was recrystallized from MeOH to yield the desired cross-coupled product, **29** (1.863 g, 86%) as a white crystalline solid (mp = 118-120 °C).

<sup>1</sup>H NMR (CDCl<sub>3</sub>, 500 MHz) δ ppm 7.67 (ABq, *J*<sub>AB</sub> = 8.8 Hz, 4H), 7.49 (d, *J* = 8.1 Hz, 2H), 7.33 (d, *J* = 8.2 Hz, 2H), 2.45 (dd, *J* = 9.8, 3.6 Hz, 1H), 2.06 (dd, *J* = 13.3, 9.9 Hz, 1H), 1.50 - 1.56 (m, 1H), 1.16 (d, *J* = 1.7 Hz, 12H), 0.92 (s, 9H). <sup>13</sup>C NMR (CDCl<sub>3</sub>, 125 MHz) δ ppm 145.6, 145.0, 136.6, 129.1, 127.4, 125.9 (q, *J*<sub>C-F</sub> = 3.6 Hz, C), 124.7 (q, *J*<sub>C-F</sub> = 271.6 Hz, CF<sub>3</sub>), 83.6, 46.9, 31.7, 30.0, 24.9, 24.8. <sup>11</sup>B NMR

(CDCl<sub>3</sub>, 128.4 MHz)  $\delta$  33.1. <sup>19</sup>F NMR (CDCl<sub>3</sub>, 471 MHz)  $\delta$  ppm -62.3 (3F). FT-IR (cm<sup>-1</sup>, neat, ATR) 2950 (m) 1573 (w), 1310 (vs), 1132 (m) 1087 (m). HRMS (EI) calcd for C<sub>25</sub>H<sub>32</sub>BF<sub>3</sub>O<sub>2</sub> [M]<sup>+</sup>: 432.2447, found: 432.2455.

## Functionalization of Bpin-Containing DCF Products

### Homologation

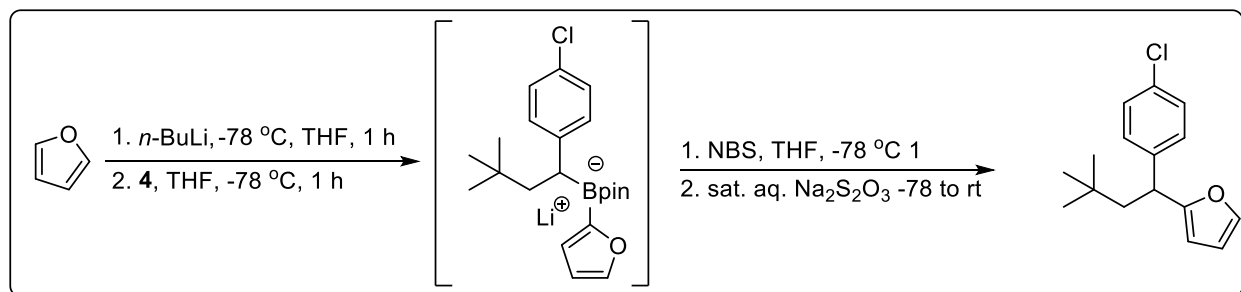

**2-(1-(4-Chlorophenyl)-3,3-dimethylbutyl)furan, 4a** (0.055 g, 60%) was prepared from **4** according to a modified literature procedure.<sup>29</sup> A solution of furan (30.5  $\mu$ L, 0.42 mmol, 1.2 equiv) in THF (2 mL, 0.2 M) was cooled to -78 °C and treated with *n*-BuLi (170  $\mu$ L, 0.42 mmol, 1.2 equiv, 2.5 M in hexanes). After this time, the reaction mixture was charged with **4** (113 mg, 0.35 mmol, 1 equiv) in THF (1 mL, 0.35 M) dropwise. The mixture was stirred for one hour at -78 °C. After this time, the reaction mixture was charged with a solution of NBS (74.8 mg, 0.42 mmol, 1.2 equiv) and stirred at -78 °C for 1 h. Saturated Na<sub>2</sub>S<sub>2</sub>O<sub>3</sub> (1.5 mL) was added to the reaction mixture and stirred vigorously while warming to room temperature over an hour. The reaction mixture was transferred to a separatory funnel, diluted with Et<sub>2</sub>O and H<sub>2</sub>O, and layers separated. The aq layer was extracted twice with Et<sub>2</sub>O. The combined organic layers were washed with deionized H<sub>2</sub>O, dried (Na<sub>2</sub>SO<sub>4</sub>) and the solvent was removed *in vacuo* by rotary evaporation. Further purification was accomplished by SiO<sub>2</sub> column chromatography (hexanes/EtOAc). The desired compound **4a** was obtained as a dense, colorless oil.

<sup>1</sup>H NMR (CDCl<sub>3</sub>, 500 MHz)  $\delta$  ppm 7.21 (d, *J* = 8.4 Hz, 2H), 7.16 (d, *J* = 8.5 Hz, 2H), 6.23 – 6.21 (m, 1H), 5.97 (d, *J* = 2.9 Hz, 1H), 4.01 (t, *J* = 6.8 Hz, 1H), 2.12 (dd, *J* = 14.0, 7.5 Hz, 1H), 1.75 (dd, *J* = 14.0, 6.1 Hz, 1H), 0.79 (s, 9H). <sup>13</sup>C NMR (CDCl<sub>3</sub>, 125 MHz)  $\delta$  ppm 158.3, 143.4, 141.4, 132.2, 129.4, 128.8, 110.5, 105.5, 48.6, 41.7, 31.4, 30.0. FT-IR (cm<sup>-1</sup>, neat, ATR) 2954 (m), 1490 (m), 1091 (s), 1014 (s), 727 (m). HRMS (EI) calcd for C<sub>16</sub>H<sub>19</sub>ClO [M]<sup>+</sup>: 262.1124, found: 262.1131.

## Oxidation

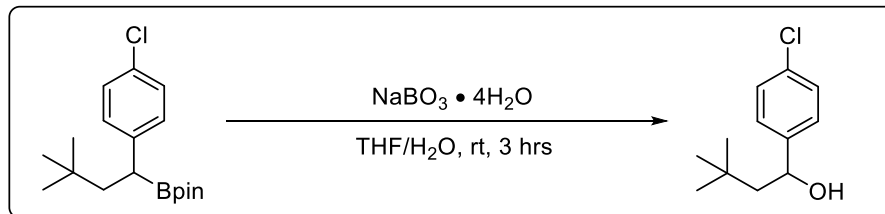

**1-(4-Chlorophenyl)-3,3-dimethylbutan-1-ol, 4b** (0.100 g, 94%) was prepared from **4** via the following procedure: A solution of **4** (0.161 g, 0.500 mmol) was dissolved in THF (4 mL) and deionized water (1 mL). Sodium perborate tetrahydrate (0.539 g, 3.50 mmol, 7.0 equiv) was then added in one portion and the reaction stirred for 4 h at rt. The reaction was then diluted with diethyl ether (5 mL) and water (5 mL) and the organic layer extracted. The aqueous layer was extracted with additional diethyl ether (5 mL) and the combined organic extracts were dried over anhydrous Na<sub>2</sub>SO<sub>4</sub> and concentrated via rotary evaporation. The resulting crude oil was purified by passing the crude material through a short pad of SiO<sub>2</sub>, eluting with hexanes/EtOAc (4:1) to yield the desired compound, **4b**, as a colorless oil.

**<sup>1</sup>H NMR** (CDCl<sub>3</sub>, 500 MHz)  $\delta$  ppm 7.28 (q,  $J$  = 8.2 Hz, 4H), 4.80 (dd,  $J$  = 8.0, 2.5 Hz, 1H), 1.81 (br. s, 1H), 1.72 (dd,  $J$  = 14.5, 8.4 Hz, 1H), 1.55 (dd,  $J$  = 14.5, 3.2 Hz, 1H), 0.99 (s, 9H). **<sup>13</sup>C NMR** (CDCl<sub>3</sub>, 125 MHz)  $\delta$  ppm 145.2, 133.2, 128.9, 127.4, 72.1, 53.3, 30.8, 30.4. **FT-IR** (cm<sup>-1</sup>, neat, ATR) 3340 (br), 2926 (m), 1165 (m), 1142 (m), 942 (s). **HRMS** (EI) calcd for C<sub>12</sub>H<sub>17</sub>ClO [M<sup>+</sup>]: 212.0968, found: 212.0974.

## Cross-Coupling

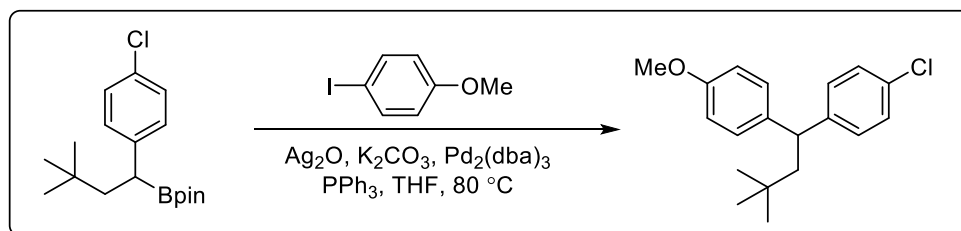

**1-Chloro-4-(1-(4-methoxyphenyl)-3,3-dimethylbutyl)benzene, 4c** (0.074 g, 94%) was prepared from **4** via a modified literature procedure.<sup>30</sup> A two-dram vial, equipped with a stir bar, was charged with **4** (0.084 g, 0.259 mmol, 1.0 equiv), 4-iodoanisole (0.121 g, 0.519 mmol, 2.0 equiv), Ag<sub>2</sub>O (0.090 g, 0.388 mmol, 1.5 equiv), K<sub>2</sub>CO<sub>3</sub> (0.054 g, 0.388 mmol, 1.5 equiv), Pd<sub>2</sub>(dba)<sub>3</sub> (0.012 g, 0.013 mmol, 5 mol %) and PPh<sub>3</sub> (0.027 g, 0.103 mmol, 40 mol %). The vial was placed under an Ar atmosphere via an inlet needle. Anhydrous THF (3 mL) was added via syringe and the reaction heated 80 °C for 16 hours. The reaction was then cooled to room temperature and filtered through a pad of Celite<sup>®</sup> and concentrated via

rotary evaporation. The resulting crude oil was purified via flash silica chromatography (hexanes to 9:1 hexanes/EtOAc) to yield the desired compound, **4c**, as a colorless oil.

**<sup>1</sup>H NMR** (CDCl<sub>3</sub>, 500 MHz) δ ppm 7.24 - 7.17 (m, 4H), 7.16 (d, *J* = 8.5 Hz, 2H), 6.80 (d, *J* = 8.5 Hz, 2H), 3.98 (t, *J* = 6.7 Hz, 1H), 3.76 (s, 3H), 2.03 (dd, *J* = 6.6, 4.7 Hz, 2H), 0.82 (s, 9H). **<sup>13</sup>C NMR** (CDCl<sub>3</sub>, 125 MHz) δ ppm 158.1, 146.0, 138.7, 131.7, 129.3, 128.8, 128.8, 114.2, 55.5, 49.8, 47.2, 31.8, 30.5. **FT-IR** (cm<sup>-1</sup>, neat, ATR) 2951 (m), 1510 (s), 1247 (vs), 1035 (w), 823 (m). **HRMS** (EI) calcd for C<sub>19</sub>H<sub>23</sub>ClO [M<sup>+</sup>]: 302.1437, found: 302.1450.

## Synthesis of an Intermediate to TK-666 and Related Derivatives

### Synthesis of a TK-666 Intermediate via Ni/Photoredox DCF/Oxidation Protocol

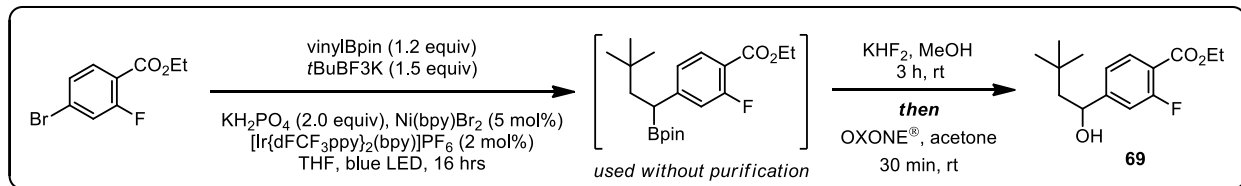

**Ethyl 2-Fluoro-4-(1-hydroxy-3,3-dimethylbutyl)benzoate, 69** (0.102 g, 77%) was prepared via a three-step reaction sequence.<sup>31</sup> Ethyl 4-bromo-2-fluorobenzoate (0.124 g, 0.500 mmol) was subjected to standard conditions used in General DCF procedure *with the following modification*. After 16 hours of irradiation the crude material was passed through a fritted disk filter and washed with THF (5 mL). The crude solution was concentrated to ~5 mL total volume. The reaction flask was placed in an ice/water bath and saturated aqueous KHF<sub>2</sub> (0.44 mL, 2.0 mmol, 4.5 M) was added dropwise. After stirring for 3 hours, the reaction was evaporated to dryness and the crude material was extracted with three portions of boiling acetone (~5 mL each). The solution was concentrated to ~3 mL total volume. Oxone<sup>®</sup> (0.308 g, 0.500 mmol, 1.0 equiv) in water (2.5 mL) was added in one portion. After stirring at room temperature for 30 min, saturated aqueous NH<sub>4</sub>Cl (5 mL) was added and the mixture was extracted twice with ethyl acetate (5 mL each). The combined organic extracts were dried over sodium sulfate, filtered and concentrated via rotary evaporation. The crude oil was purified via flash silica column chromatography (hexanes to 8:2 hexanes/EtOAc) to yield the desired compound, **69**, as a clear, colorless oil.

**<sup>1</sup>H NMR** (CDCl<sub>3</sub>, 500 MHz) δ ppm 7.86 (t, *J* = 8.1 Hz, 1H), 7.14 – 7.09 (m, 2H), 4.84 (d, *J* = 8.6 Hz, 1H), 4.37 (q, *J* = 7.2 Hz, 2H), 2.04 (br. s, 1H), 1.68 (dd, *J* = 14.6, 8.7 Hz, 1H), 1.53 (dd, *J* = 14.6, 3.0 Hz, 1H), 1.38 (t, *J* = 7.2 Hz, 3H), 1.00 (s, 9H). **<sup>13</sup>C NMR** (CDCl<sub>3</sub>, 125 MHz) δ ppm 164.6 (d, *J* = 3.7 Hz), 162.4 (d, *J* = 261 Hz), 154.4 (d, *J* = 8.2 Hz), 132.5, 121.3 (d, *J* = 3.6 Hz), 117.8 (d, *J* = 10.0 Hz), 114.3 (d, *J* = 23 Hz), 71.8, 61.5, 52.3, 30.9, 30.4, 14.5. **<sup>19</sup>F NMR** (CDCl<sub>3</sub>, 471 MHz) δ ppm -112.0. **FT-IR** (cm<sup>-1</sup>, neat, ATR) 3456 (br), 2953 (m), 1711 (s), 1278 (vs), 1084 (vs), 775 (m). **HRMS** (EI) calcd for C<sub>15</sub>H<sub>21</sub>FO<sub>3</sub> [M<sup>+</sup>]: 268.1465, found: 268.1475.

## Ni/Photoredox Dicarbonylation of S3

### 2-(3-Chlorophenoxy)-4-(3,3-dimethyl-1-(4,4,5,5-tetramethyl-1,3,2-dioxaborolan-2-yl)butyl)

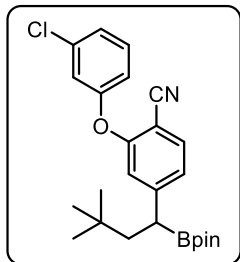

**Benzonitrile, 70** (0.136 g, 62%) was prepared according to the general DCF procedure using aryl bromide **S3** (0.154 g, 0.5 mmol). The desired compound, **70**, was obtained as a colorless viscous oil. **<sup>1</sup>H NMR** (CDCl<sub>3</sub>, 500 MHz) δ ppm 7.53 (d, *J* = 8.1 Hz, 1H), 7.30 (t, *J* = 8.1 Hz, 1H), 7.16 (ddd, *J* = 7.0, 4.0, 2.6 Hz, 1H), 7.06 (dd, *J* = 8.1, 1.4 Hz, 1H), 7.00 (t, *J* = 2.1 Hz, 1H), 6.94 (ddd, *J* = 8.2, 2.3, 0.8 Hz, 1H), 6.84 (d, *J* = 1.2 Hz, 1H), 2.40 (dd, *J* = 9.0, 4.6 Hz, 1H), 1.90 (dd, *J* = 13.4, 9.0 Hz, 1H), 1.43 (dd, *J* = 13.4, 4.6 Hz, 1H), 1.12 (d, *J* = 5.5 Hz, 12H), 0.85 (s, 9H). **<sup>13</sup>C NMR** (CDCl<sub>3</sub>, 125 MHz) δ ppm 158.6, 156.9, 153.9, 135.6, 133.9, 131.0, 124.9, 124.4, 119.7, 118.4, 117.7, 116.4, 101.6, 84.0, 46.0, 31.8, 29.9, 24.8, 24.7. **<sup>11</sup>B NMR** (CDCl<sub>3</sub>, 128.4 MHz) 32.3. **FT-IR** (cm<sup>-1</sup>, neat, ATR) 2891 (w), 2229 (w), 1239 (vs), 1138 (s), 1110 (m), 848 (m). **HRMS** (EI) calcd for C<sub>25</sub>H<sub>31</sub>BClNO<sub>3</sub> [M<sup>+</sup>]: 439.2086, found: 439.2087.

### 4-(2-(Adamantan-1-yl)-1-(4,4,5,5-tetramethyl-1,3,2-dioxaborolan-2-yl)ethyl)-2-(3-chloro

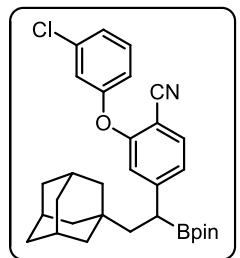

**phenoxy)benzonitrile, 71** (0.142 g, 55%) was prepared according to the general DCF procedure using aryl bromide **S3** (0.154 g, 0.5 mmol). The desired compound, **71**, was obtained as a white foam. **<sup>1</sup>H NMR** (CDCl<sub>3</sub>, 500 MHz) δ ppm 7.53 (d, *J* = 8.1 Hz, 1H), 7.30 (t, *J* = 8.1 Hz, 1H), 7.16 (ddd, *J* = 7.0, 4.0, 2.6 Hz, 1H), 7.06 (dd, *J* = 8.1, 1.4 Hz, 1H), 7.00 (t, *J* = 2.1 Hz, 1H), 6.94 (ddd, *J* = 8.2, 2.3, 0.8 Hz, 1H), 6.84 (d, *J* = 1.2 Hz, 1H), 2.40 (dd, *J* = 9.0, 4.6 Hz, 1H), 1.90 (dd, *J* = 13.4, 9.0 Hz, 1H), 1.43 (dd, *J* = 13.4, 4.6 Hz, 1H), 1.12 (d, *J* = 5.5 Hz, 12H), 0.85 (s, 9H). **<sup>13</sup>C NMR** (CDCl<sub>3</sub>, 125 MHz) δ ppm 158.5, 157.0, 154.1, 135.6, 133.9, 131.0, 124.9, 124.5, 119.7, 118.6, 117.7, 116.4, 101.5, 84.0, 46.6, 42.9, 37.3, 33.7, 28.9, 24.8, 24.7. **<sup>11</sup>B NMR** (CDCl<sub>3</sub>, 128.4 MHz) 33.2. **FT-IR** (cm<sup>-1</sup>, neat, ATR) 2901 (m), 2846 (w), 2229 (w), 1358 (m), 1239 (vs), 1140 (s), 840 (m), 778 (w). **HRMS** (EI) calcd for C<sub>31</sub>H<sub>37</sub>BClNO<sub>3</sub> [M<sup>+</sup>]: 517.2555, found: 517.2540.

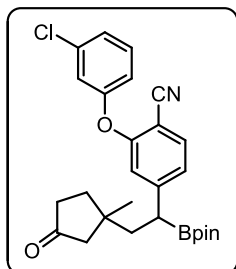

**2-(3-Chlorophenoxy)-4-(2-(1-methyl-3-oxocyclopentyl)-1-(4,4,5,5-tetramethyl-1,3,2-dioxaborolan-2-yl)ethyl)benzonitrile, 72** (0.190 g, 79%) was prepared according to the general DCF procedure using aryl bromide **S3** (0.154 g, 0.5 mmol). The desired compound, **72**, was obtained as a yellow-tinted oil. <sup>1</sup>H NMR (CDCl<sub>3</sub>, 500 MHz) δ ppm 7.55 (dd, *J* = 8.1, 3.2 Hz, 1H), 7.31 (t, *J* = 8.2 Hz, 1H), 7.17 (ddd, *J* = 7.9, 1.8, 0.8 Hz, 1H), 7.07 - 7.02 (m, 1H), 7.02 - 6.98 (m, 1H), 6.97 - 6.93 (m, 1H), 6.81 (dd, *J* = 12.2, 1.4 Hz, 1H), 2.40 (dd, *J* = 8.2, 5.6 Hz, 1H), 2.28 - 2.21 (m, 2 H), 2.14 - 2.09 (m, 1H), 2.08 - 2.00 (m, 1 H), 1.89 (d, *J* = 6.1 Hz, 1H), 1.79 - 1.73 (m, 1H), 1.69 - 1.64 (m, 2H), 1.13 (d, *J* = 3.2 Hz, 12 H), 1.00 (s, 3 H). <sup>13</sup>C NMR (CDCl<sub>3</sub>, 125 MHz) δ ppm 219.3, 158.8, 158.8, 156.7, 156.7, 152.8, 152.6, 135.6, 134.2, 131.1, 125.1, 124.2, 119.9, 119.8, 118.2, 118.1, 117.9, 117.8, 116.1, 101.9, 84.3, 84.3, 52.8, 52.7, 43.7, 40.7, 40.6, 36.9, 36.7, 35.7, 25.2, 24.9, 24.8, 24.7. <sup>11</sup>B NMR (CDCl<sub>3</sub>, 128.4 MHz) 33.4. FT-IR (cm<sup>-1</sup>, neat, ATR) 2977 (w), 2229 (w), 1738 (m), 1371 (m), 1138 (vs), 849 (m). HRMS (EI) calcd for C<sub>27</sub>H<sub>31</sub>BCINO<sub>4</sub> [M<sup>+</sup>]: 479.2035, found: 479.2041.

### Synthesis of a TK-666 Derivative via Oxidation

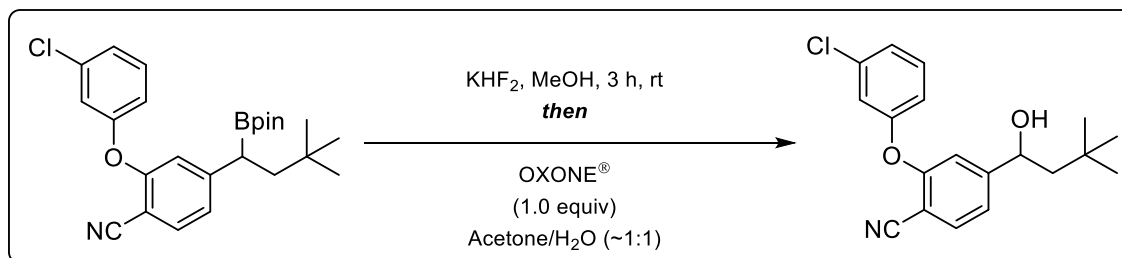

**2-(3-Chlorophenoxy)-4-(1-hydroxy-3,3-dimethylbutyl)benzonitrile, 70a** (0.143 g, 71%) was prepared from 2-(3-chlorophenoxy)-4-(3,3-dimethyl-1-(4,4,5,5-tetramethyl-1,3,2-dioxaborolan-2-yl)butyl)benzonitrile **68** (0.269 g, 0.611 mmol) in a two-step reaction sequence.<sup>31</sup> **70** was converted to the corresponding organotrifluoroborate using GPA3 (see page S13). The resulting solid (0.190 g, 0.453 mmol) was then dissolved in acetone (3 mL) and a solution Oxone<sup>®</sup> (0.278 g, 0.453 mmol, 1.0 equiv) in water (2.5 mL) was added in one portion. After stirring at room temperature for 30 min, saturated aqueous NH<sub>4</sub>Cl (5 mL) was added and the mixture was extracted twice with ethyl acetate (5 mL each). The combined organic extracts were dried over



sodium sulfate, filtered and concentrated via rotary evaporation. The crude oil was purified via flash silica column chromatography to yield the desired compound, **68a**, as a clear, colorless oil.

**<sup>1</sup>H NMR** (CDCl<sub>3</sub>, 500 MHz) δ ppm 7.63 (d, *J* = 7.9 Hz, 1H), 7.32 (t, *J* = 8.1 Hz, 1H), 7.19 (dd, *J* = 8.1, 0.9 Hz, 1H), 7.14 (d, *J* = 7.9, 0.9 Hz, 1H), 7.06 (m, 1H), 6.96 (m, 2H), 4.86 - 4.77 (m, 1H), 1.80 (d, *J* = 3.4 Hz, 1H), 1.63 (dd, *J* = 14.6, 8.9 Hz, 1H), 1.48 (dd, *J* = 14.6, 2.4 Hz, 1H), 0.99 (s, 9H). **<sup>13</sup>C NMR** (CDCl<sub>3</sub>, 125 MHz) δ ppm 159.2, 156.5, 154.5, 135.7, 134.3, 131.2, 125.3, 121.4, 120.1, 117.9, 115.9, 115.4, 103.3, 72.0, 53.4, 31.0, 30.4. **FT-IR** (cm<sup>-1</sup>, neat, ATR) 3436 (br w) 2952 (m), 2237 (w), 1566 (m), 1243 (vs), 1243 (s), 1109 (m), 871 (m), 678 (m). **HRMS** (EI) calcd for C<sub>19</sub>H<sub>20</sub>ClNO<sub>2</sub> [M<sup>+</sup>]: 329.1183, found: 329.1190.

## Limitations of the Method

### Robustness Screen for Ni/Photoredox Dicarbofunctionalization

**Procedure for evaluation of reaction robustness:**

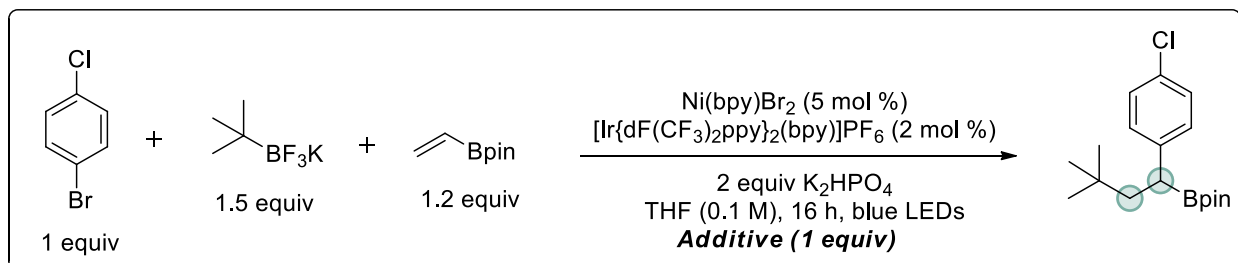

To a 4 mL reaction vial equipped with a stirrer bar was added 1-bromo-4-chlorobenzene (**1**) (19.1 mg, 0.1 mmol, 1 equiv), *t*BuBF<sub>3</sub>K (**2**) (24.6 mg, 0.15 mmol, 1.5 equiv), and [Ir{dF(CF<sub>3</sub>)<sub>2</sub>ppy}<sub>2</sub>(bpy)]PF<sub>6</sub> (2.0 mg, 0.002 mmol, 0.02 equiv), anhyd NiBr<sub>2</sub>(bpy) (0.005 mmol, 0.05 equiv), K<sub>2</sub>HPO<sub>4</sub> (34.8 mg, 0.2 mmol, 2 equiv), and, if solid, the additive of interest (0.1 mmol, 1 equiv). The vial was sealed with a cap containing a TFE-lined silicone septa and was evacuated and purged with argon three times via an inlet needle. The vial was then charged with the vinyl boronate (**3**) (20.6 mg, 0.12 mmol, 1.2 equiv), and, if liquid, the additive of interest (0.1 mmol, 1 equiv) in anhyd degassed THF (1 mL). After this, the cap was sealed with Parafilm®, and the vial was irradiated with blue LEDs for 16 h. The temperature of the reaction was maintained at approximately 27 °C via a fan. After 16 h, an aliquot of a solution of 4,4'-di-*tert*-butylbiphenyl in MeCN with a known concentration (20 mol % relative to the aryl halide) was added to each vial and thoroughly mixed. A 250 μL aliquot was then removed from each vial, diluted with 500 μL of MeCN, and analyzed by UV/Vis absorption on a UPLC. Response factors for the starting material and product were determined (using NMR and HPLC). This value was used to calculate yield. The remaining additive was determined strictly using HPLC response factors.

**Table S8: Ni/Photoredox DCF Robustness Screen Results<sup>a</sup>**

| Entry | Remaining Additive                                                                  | Yield of Product   | Remaining Aryl Bromide | Entry | Remaining Additive | Yield of Product                                                                    | Remaining Aryl Bromide |       |       |
|-------|-------------------------------------------------------------------------------------|--------------------|------------------------|-------|--------------------|-------------------------------------------------------------------------------------|------------------------|-------|-------|
| 1     | 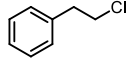   | ✓ 100%             | ✓ 96%                  | ✓ 4%  | 14                 |    | ✓ 91%                  | ✓ 95% | ✓ 5%  |
| 2     |    | ✓ 92%              | ✓ 93%                  | ✓ 7%  | 15                 |    | − 91%                  | ✓ 88% | ✓ 11% |
| 3     |    | ○ --- <sup>b</sup> | ✓ 100%                 | ✓ 0%  | 16                 |    | ✗ 0%                   | ✓ 85% | ✓ 15% |
| 4     |    | ✗ 20%              | ✗ 45%                  | ✗ 55% | 17                 |    | ✓ 100%                 | ✗ 8%  | ✓ 11% |
| 5     |    | ✓ 100%             | ✗ 26%                  | ✗ 72% | 18                 |    | ○ --- <sup>b</sup>     | ✗ 26% | ✗ 74% |
| 6     |    | ✓ 88%              | ✓ 100%                 | ✓ 0%  | 19                 |    | ✓ 81%                  | − 45% | − 55% |
| 7     |  | ✓ 90%              | ✓ 100%                 | ✓ 0%  | 20                 |  | ✓ 100%                 | ✗ 2%  | ✗ 91% |
| 8     |  | ✗ 32%              | ✗ 26%                  | ✗ 80% | 21                 |  | ✓ 100%                 | ✗ 4%  | ✗ 89% |
| 9     |  | − 60%              | ✗ 0%                   | ✗ 98% | 22                 |  | ○ --- <sup>b</sup>     | ✗ 31% | − 58% |
| 10    |  | ✓ 100%             | ✗ 0%                   | ✓ 10% | 23                 |  | ✓ 100%                 | − 47% | − 53% |
| 11    |  | ✓ 100%             | ✗ 3%                   | ✗ 97% | 24                 |  | ○ --- <sup>b</sup>     | ✓ 74% | ✓ 24% |
| 12    |  | ✓ 100%             | ✗ 0%                   | ✗ 83% | 25                 | NONE                                                                                | ○ --- <sup>b</sup>     | ✓ 93% | ✓ 7%  |
| 13    |  | ✓ 100%             | − 55%                  | − 45% |                    |                                                                                     |                        |       |       |

<sup>a</sup> General reaction conditions: 1-bromo-4-chlorobenzene (0.1 mmol, 1 equiv), <sup>t</sup>BuBF<sub>3</sub>K (0.15 mmol, 1.5 equiv), and [Ir{dF(CF<sub>3</sub>)<sub>2</sub>ppy}<sub>2</sub>(bpy)]PF<sub>6</sub> (0.002 mmol, 0.02 equiv), anhyd Ni(bpy)Br<sub>2</sub> (0.005 mmol, 0.05 equiv), K<sub>2</sub>HPO<sub>4</sub> (0.2 mmol, 2 equiv), and the additive of interest (0.1 mmol, 1 equiv), VinylBpin (0.12 mmol, 1.2 equiv) THF (0.1 M), 16 h, irradiating with blue LED; Yield determined as described above. <sup>b</sup> Not determined, additive eluted with the solvent front on HPLC or was not UV active.

## Failed examples for Ni/Photoredox Dicarbofunctionalization

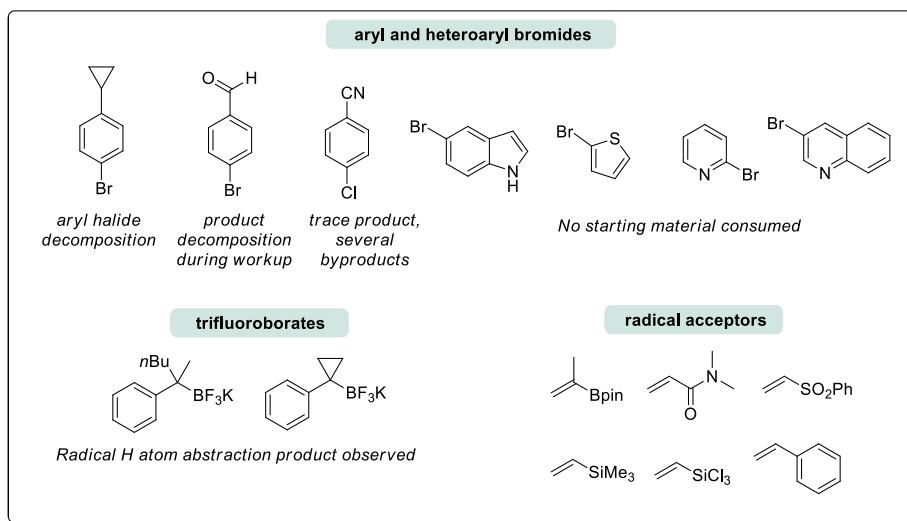

## Mechanistic Experiments Organotrifluoroborate Competition Experiment

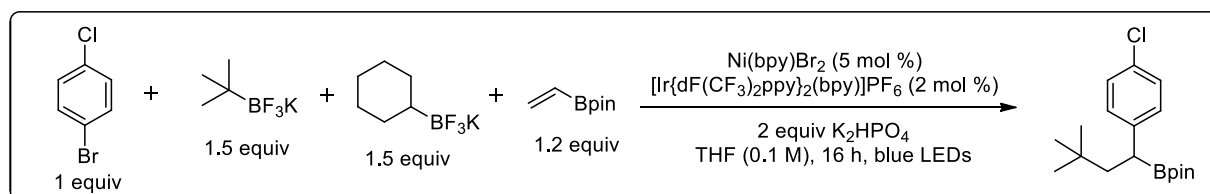

This experiment was carried out following General Procedure B *with the following modification*. Cyclohexyltrifluoroborate was added to the reaction (28.5 mg, 0.15 mmol, 1.5 equiv). The ratio of products was determined without the use of an internal standard.

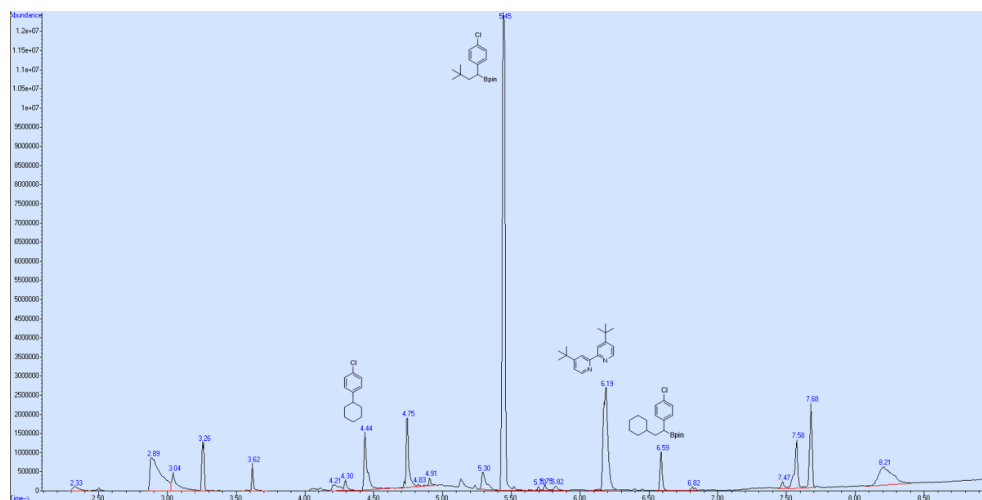

GC/MS trace of competition experiment with labeled peaks of key products.

## Control Reactions for Mechanistic Insight

Experiments with a Ni<sup>0</sup> source in the absence of photocatalyst and radical precursor were performed to probe the possibility of Heck or Suzuki-type coupling reactivity. The crude reaction was filtered through a Celite<sup>®</sup> plug and analyzed by <sup>1</sup>H NMR. Results of this experiment provide further support for our proposed mechanism, as there was no consumption of vinylBpin under conditions similar to those in our original reaction.

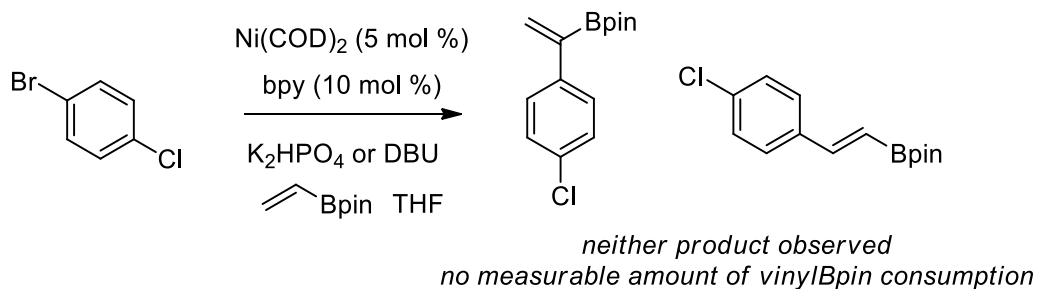

## Crystallographic Data for Relevant Compounds

### X-ray Structure Determination of Compound 4

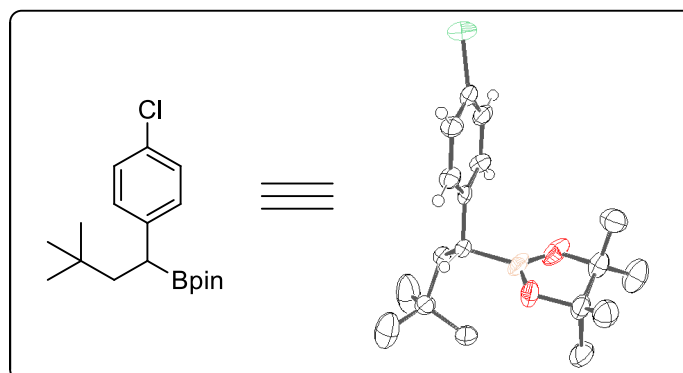

Compound 9241,  $C_{18}H_{28}O_2BCl$ , crystallizes in the triclinic space group PT with  $a=9.2264(4)\text{\AA}$ ,  $b=9.8051(4)\text{\AA}$ ,  $c=12.0617(6)\text{\AA}$ ,  $\alpha=112.120(2)^\circ$ ,  $\beta=103.086(2)^\circ$ ,  $\gamma=101.278(2)^\circ$ ,  $V=935.71(7)\text{\AA}^3$ ,  $Z=2$ , and  $d_{\text{calc}}=1.145\text{ g/cm}^3$ . X-ray intensity data were collected on a Bruker APEXII [1] CCD area detector employing graphite-monochromated Mo-K $\alpha$  radiation ( $\lambda=0.71073\text{\AA}$ ) at a temperature of 173K. Preliminary indexing was performed from a series of thirty-six  $0.5^\circ$  rotation frames with exposures of 10 seconds. A total of 2724 frames were collected with a crystal to detector distance of 37.5 mm, rotation widths of  $0.5^\circ$  and exposures of 15 seconds:

| scan type | $2\theta$ | $\omega$ | $\phi$ | $\chi$ | Frames |
|-----------|-----------|----------|--------|--------|--------|
| $\phi$    | -23.00    | 315.83   | 12.48  | 28.88  | 739    |
| $\omega$  | -5.50     | 321.59   | 133.99 | 70.63  | 69     |
| $\phi$    | -23.00    | 334.21   | 38.95  | 73.66  | 739    |
| $\phi$    | 24.50     | 7.41     | 12.48  | 28.88  | 739    |
| $\phi$    | -25.50    | 323.22   | 190.42 | 83.36  | 438    |

Rotation frames were integrated using SAINT [2], producing a listing of unaveraged  $F^2$  and  $\sigma(F^2)$  values. A total of 22602 reflections were measured over the ranges  $3.862 \leq 2\theta \leq 55.014^\circ$ ,  $-11 \leq h \leq 11$ ,  $-12 \leq k \leq 12$ ,  $-15 \leq l \leq 15$  yielding 4181 unique reflections ( $R_{\text{int}} = 0.0306$ ). The intensity data were corrected for

Lorentz and polarization effects and for absorption using SADABS [3] (minimum and maximum transmission 0.6228, 0.7456). The structure was solved by direct methods – ShelXS-97 [4]. The CH<sub>2</sub>-CH-PhCl substituent is disordered in two different orientations in a ratio of 55:45. Refinement was by full-matrix least squares based on F<sup>2</sup> using SHELXL-2017 [5]. All reflections were used during refinement. The weighting scheme used was  $w=1/[\sigma^2(F_o^2) + (0.0869P)^2 + 0.6032P]$  where  $P = (F_o^2 + 2F_c^2)/3$ . Non-hydrogen atoms were refined anisotropically and hydrogen atoms were refined using a riding model. Refinement converged to R1=0.0613 and wR2=0.1682 for 3338 observed reflections for which  $F > 4\sigma(F)$  and R1=0.0751 and wR2=0.1802 and GOF = 1.030 for all 4181 unique, non-zero reflections and 263 variables. The maximum  $\Delta/\sigma$  in the final cycle of least squares was 0.000 and the two most prominent peaks in the final difference Fourier were +0.69 and -0.40 e/Å<sup>3</sup>.

Table 1. lists cell information, data collection parameters, and refinement data. Final positional and equivalent isotropic thermal parameters are given in Tables 2. and 3. Anisotropic thermal parameters are in Table 4. Tables 5. and 6. list bond distances and bond angles. Figures 1. and 2. are ORTEP representations of the molecule with 50% probability thermal ellipsoids displayed.

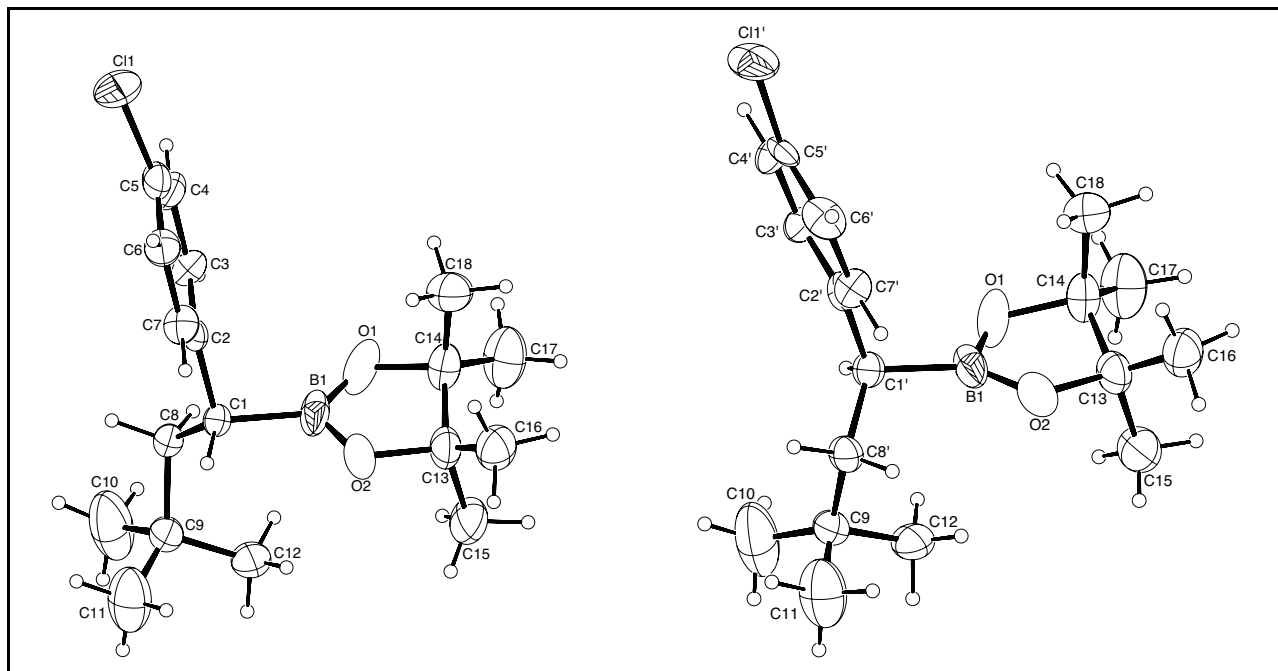

Figure 1. ORTEP drawing of the two disorder models with 50% thermal ellipsoids.

**Table 1. Summary of Structure Determination of Compound 4**

|                                      |                                                    |
|--------------------------------------|----------------------------------------------------|
| Empirical formula                    | C <sub>18</sub> H <sub>28</sub> O <sub>2</sub> BCl |
| Formula weight                       | 322.66                                             |
| Temperature/K                        | 173                                                |
| Crystal system                       | triclinic                                          |
| Space group                          | P $\bar{1}$                                        |
| a                                    | 9.2264(4)Å                                         |
| b                                    | 9.8051(4)Å                                         |
| c                                    | 12.0617(6)Å                                        |
| $\alpha$                             | 112.120(2)°                                        |
| $\beta$                              | 103.086(2)°                                        |
| $\gamma$                             | 101.278(2)°                                        |
| Volume                               | 935.71(7)Å <sup>3</sup>                            |
| Z                                    | 2                                                  |
| $d_{\text{calc}}$                    | 1.145 g/cm <sup>3</sup>                            |
| $\mu$                                | 0.208 mm <sup>-1</sup>                             |
| F(000)                               | 348.0                                              |
| Crystal size, mm                     | 0.17 × 0.16 × 0.04                                 |
| 2 $\theta$ range for data collection | 3.862 - 55.014°                                    |
| Index ranges                         | -11 ≤ h ≤ 11, -12 ≤ k ≤ 12, -15 ≤ l ≤ 15           |
| Reflections collected                | 22602                                              |
| Independent reflections              | 4181[R(int) = 0.0306]                              |
| Data/restraints/parameters           | 4181/108/263                                       |
| Goodness-of-fit on F <sup>2</sup>    | 1.030                                              |



Final R indexes [ $I \geq 2\sigma(I)$ ]  $R_1 = 0.0613$ ,  $wR_2 = 0.1682$

Final R indexes [all data]  $R_1 = 0.0751$ ,  $wR_2 = 0.1802$

Largest diff. peak/hole  $0.69/-0.40 \text{ e}\text{\AA}^{-3}$

**Table 2 . Refined Positional Parameters for Compound 4**

| Atom | x           | y          | z           | U(eq)      |
|------|-------------|------------|-------------|------------|
| O1   | 0.79119(18) | 0.9307(2)  | 0.33128(17) | 0.0600(5)  |
| O2   | 0.71082(19) | 0.7671(2)  | 0.12189(19) | 0.0563(5)  |
| C1   | 0.9897(4)   | 0.7974(4)  | 0.2176(4)   | 0.0292(7)  |
| C2   | 1.0967(7)   | 0.9542(6)  | 0.2380(4)   | 0.0254(11) |
| C3   | 1.1666(8)   | 1.0760(8)  | 0.3596(4)   | 0.0319(13) |
| C4   | 1.2613(11)  | 1.2174(8)  | 0.3777(7)   | 0.0387(15) |
| C5   | 1.2861(13)  | 1.2370(9)  | 0.2740(9)   | 0.041(2)   |
| C6   | 1.2163(13)  | 1.1152(10) | 0.1524(8)   | 0.0387(14) |
| C7   | 1.1216(10)  | 0.9738(8)  | 0.1343(4)   | 0.0340(11) |
| Cl1  | 1.4271(10)  | 1.4016(9)  | 0.2938(10)  | 0.0634(13) |
| C1'  | 1.0071(5)   | 0.8428(5)  | 0.2925(5)   | 0.0318(8)  |
| C2'  | 1.1068(9)   | 0.9804(7)  | 0.2849(5)   | 0.0263(14) |
| C3'  | 1.1976(10)  | 1.1138(9)  | 0.3957(5)   | 0.0345(15) |
| C4'  | 1.2956(13)  | 1.2364(9)  | 0.3892(9)   | 0.039(2)   |
| C5'  | 1.3027(16)  | 1.2256(11) | 0.2720(11)  | 0.0308(17) |
| C6'  | 1.2119(15)  | 1.0922(12) | 0.1613(8)   | 0.0416(19) |
| C7'  | 1.1139(11)  | 0.9696(9)  | 0.1677(5)   | 0.0321(16) |
| Cl1' | 1.4132(10)  | 1.3842(10) | 0.2694(12)  | 0.0627(16) |

|     |           |           |           |            |
|-----|-----------|-----------|-----------|------------|
| C8  | 1.0633(4) | 0.7438(4) | 0.3151(3) | 0.0325(7)  |
| C8' | 1.0202(5) | 0.6855(5) | 0.2088(4) | 0.0355(9)  |
| C9  | 0.9905(2) | 0.5664(2) | 0.2721(2) | 0.0461(5)  |
| C10 | 1.0982(5) | 0.5654(5) | 0.3863(3) | 0.1075(16) |
| C11 | 0.9945(4) | 0.4367(5) | 0.1561(3) | 0.0801(10) |
| C12 | 0.8250(3) | 0.5380(3) | 0.2786(2) | 0.0482(5)  |
| C13 | 0.5719(2) | 0.8042(3) | 0.1468(2) | 0.0442(5)  |
| C14 | 0.6455(2) | 0.9539(3) | 0.2724(2) | 0.0468(5)  |
| C15 | 0.4752(3) | 0.6702(3) | 0.1613(4) | 0.0716(9)  |
| C16 | 0.4786(3) | 0.8205(3) | 0.0361(2) | 0.0554(6)  |
| C17 | 0.5543(3) | 0.9833(4) | 0.3620(3) | 0.0700(8)  |
| C18 | 0.6939(3) | 1.0981(3) | 0.2492(3) | 0.0603(7)  |
| B1  | 0.8288(3) | 0.8350(3) | 0.2337(4) | 0.0557(8)  |

**Table 3 . Positional Parameters for Hydrogens in Compound 4**

| Atom | x        | y        | z        | U(eq) |
|------|----------|----------|----------|-------|
| H1   | 0.967821 | 0.716581 | 0.129717 | 0.035 |
| H3   | 1.149623 | 1.062598 | 0.430209 | 0.038 |
| H4   | 1.308807 | 1.300308 | 0.460528 | 0.046 |
| H6   | 1.233199 | 1.12858  | 0.081771 | 0.046 |
| H7   | 1.074053 | 0.890856 | 0.051446 | 0.041 |
| H1'  | 1.030414 | 0.859065 | 0.382485 | 0.038 |
| H3'  | 1.192784 | 1.121139 | 0.475489 | 0.041 |

|      |          |          |           |       |
|------|----------|----------|-----------|-------|
| H4'  | 1.357413 | 1.327282 | 0.4646    | 0.046 |
| H6'  | 1.2167   | 1.084867 | 0.081452  | 0.05  |
| H7'  | 1.05205  | 0.878706 | 0.092322  | 0.039 |
| H8a  | 1.049085 | 0.802795 | 0.396687  | 0.039 |
| H8b  | 1.177214 | 0.767554 | 0.329376  | 0.039 |
| H8a' | 1.125611 | 0.700025 | 0.200201  | 0.043 |
| H8b' | 0.941861 | 0.641493 | 0.123176  | 0.043 |
| H10a | 1.206662 | 0.595731 | 0.388054  | 0.161 |
| H10b | 1.070081 | 0.461088 | 0.381404  | 0.161 |
| H10c | 1.087674 | 0.638769 | 0.463718  | 0.161 |
| H11a | 0.918986 | 0.428162 | 0.080263  | 0.12  |
| H11b | 0.967126 | 0.339044 | 0.162883  | 0.12  |
| H11c | 1.099843 | 0.458633 | 0.149962  | 0.12  |
| H12a | 0.823641 | 0.621755 | 0.354759  | 0.072 |
| H12b | 0.791068 | 0.438868 | 0.281902  | 0.072 |
| H12c | 0.753916 | 0.535057 | 0.203214  | 0.072 |
| H15a | 0.462067 | 0.571887 | 0.090439  | 0.107 |
| H15b | 0.372267 | 0.68217  | 0.161281  | 0.107 |
| H15c | 0.529435 | 0.67057  | 0.241324  | 0.107 |
| H16a | 0.54651  | 0.893714 | 0.017973  | 0.083 |
| H16b | 0.392941 | 0.859039 | 0.056193  | 0.083 |
| H16c | 0.43521  | 0.719383 | -0.038304 | 0.083 |
| H17a | 0.53561  | 0.897626 | 0.385484  | 0.105 |
| H17b | 0.453753 | 0.991159 | 0.32089   | 0.105 |
| H17c | 0.613573 | 1.080307 | 0.438253  | 0.105 |

|      |          |          |          |      |
|------|----------|----------|----------|------|
| H18a | 0.76453  | 1.185663 | 0.328747 | 0.09 |
| H18b | 0.600291 | 1.12393  | 0.218088 | 0.09 |
| H18c | 0.747399 | 1.076229 | 0.185963 | 0.09 |

**Table 4 . Refined Thermal Parameters (U's) for Compound 4**

| Atom | U <sub>11</sub> | U <sub>22</sub> | U <sub>33</sub> | U <sub>23</sub> | U <sub>13</sub> | U <sub>12</sub> |
|------|-----------------|-----------------|-----------------|-----------------|-----------------|-----------------|
| O1   | 0.0271(7)       | 0.0923(14)      | 0.0692(11)      | 0.0524(11)      | 0.0069(7)       | 0.0127(8)       |
| O2   | 0.0417(9)       | 0.0551(10)      | 0.0920(13)      | 0.0368(9)       | 0.0388(9)       | 0.0283(7)       |
| C1   | 0.0232(15)      | 0.0297(18)      | 0.0357(19)      | 0.0128(15)      | 0.0142(15)      | 0.0085(12)      |
| C2   | 0.0238(16)      | 0.0295(19)      | 0.029(3)        | 0.013(2)        | 0.017(3)        | 0.0118(14)      |
| C3   | 0.027(3)        | 0.038(4)        | 0.026(3)        | 0.013(2)        | 0.008(3)        | 0.003(2)        |
| C4   | 0.023(4)        | 0.042(3)        | 0.043(3)        | 0.013(2)        | 0.012(2)        | 0.0060(19)      |
| C5   | 0.029(3)        | 0.039(4)        | 0.066(4)        | 0.028(3)        | 0.026(3)        | 0.016(3)        |
| C6   | 0.039(3)        | 0.039(3)        | 0.056(3)        | 0.033(2)        | 0.023(2)        | 0.014(2)        |
| C7   | 0.036(2)        | 0.043(2)        | 0.035(3)        | 0.024(2)        | 0.019(2)        | 0.0125(17)      |
| Cl1  | 0.0530(13)      | 0.0424(14)      | 0.094(2)        | 0.0328(13)      | 0.0308(11)      | 0.0004(9)       |
| C1'  | 0.0253(19)      | 0.033(2)        | 0.040(2)        | 0.016(2)        | 0.0157(19)      | 0.0103(16)      |
| C2'  | 0.022(2)        | 0.040(4)        | 0.028(4)        | 0.020(3)        | 0.016(3)        | 0.015(3)        |
| C3'  | 0.029(4)        | 0.032(4)        | 0.038(4)        | 0.013(3)        | 0.009(3)        | 0.005(3)        |
| C4'  | 0.022(5)        | 0.037(3)        | 0.054(3)        | 0.019(3)        | 0.014(3)        | 0.002(2)        |
| C5'  | 0.028(3)        | 0.028(3)        | 0.059(4)        | 0.029(3)        | 0.028(3)        | 0.020(3)        |
| C6'  | 0.053(4)        | 0.050(4)        | 0.045(3)        | 0.033(3)        | 0.029(3)        | 0.025(4)        |
| C7'  | 0.033(3)        | 0.039(3)        | 0.026(3)        | 0.014(3)        | 0.016(3)        | 0.010(2)        |
| Cl1' | 0.057(3)        | 0.043(2)        | 0.118(5)        | 0.049(3)        | 0.054(3)        | 0.019(2)        |

|     |            |            |            |             |             |            |
|-----|------------|------------|------------|-------------|-------------|------------|
| C8  | 0.0251(15) | 0.0318(17) | 0.0410(19) | 0.0164(14)  | 0.0105(13)  | 0.0090(12) |
| C8' | 0.030(2)   | 0.035(2)   | 0.047(3)   | 0.0180(19)  | 0.0191(18)  | 0.0145(16) |
| C9  | 0.0342(10) | 0.0346(11) | 0.0728(15) | 0.0273(10)  | 0.0160(10)  | 0.0123(8)  |
| C10 | 0.083(2)   | 0.133(4)   | 0.0635(19) | -0.0003(19) | -0.0058(16) | 0.068(2)   |
| C11 | 0.0671(18) | 0.120(3)   | 0.0595(16) | 0.0324(17)  | 0.0301(14)  | 0.0461(19) |
| C12 | 0.0435(12) | 0.0365(11) | 0.0699(15) | 0.0269(10)  | 0.0245(11)  | 0.0095(9)  |
| C13 | 0.0326(10) | 0.0506(12) | 0.0611(13) | 0.0295(10)  | 0.0224(9)   | 0.0191(9)  |
| C14 | 0.0320(10) | 0.0632(14) | 0.0462(12) | 0.0242(10)  | 0.0116(9)   | 0.0182(9)  |
| C15 | 0.0425(13) | 0.0619(17) | 0.133(3)   | 0.0590(18)  | 0.0405(16)  | 0.0183(11) |
| C16 | 0.0454(13) | 0.0596(15) | 0.0482(13) | 0.0149(11)  | 0.0077(10)  | 0.0167(11) |
| C17 | 0.0581(16) | 0.109(3)   | 0.0523(14) | 0.0350(15)  | 0.0295(12)  | 0.0338(16) |
| C18 | 0.0568(15) | 0.0439(14) | 0.0719(17) | 0.0244(12)  | 0.0122(13)  | 0.0114(11) |
| B1  | 0.0276(11) | 0.0587(16) | 0.115(2)   | 0.0650(18)  | 0.0319(14)  | 0.0193(11) |

**Table 5 . Bond Distances in Compound 4, Å**

|         |           |          |           |         |          |
|---------|-----------|----------|-----------|---------|----------|
| O1-C14  | 1.473(3)  | O1-B1    | 1.366(4)  | O2-C13  | 1.463(2) |
| O2-B1   | 1.350(4)  | C1-C2    | 1.553(6)  | C1-C8   | 1.538(5) |
| C1-B1   | 1.633(4)  | C2-C3    | 1.3950    | C2-C7   | 1.3950   |
| C3-C4   | 1.3950    | C4-C5    | 1.3952    | C5-C6   | 1.3949   |
| C5-C11  | 1.761(10) | C6-C7    | 1.3950    | C1'-C2' | 1.523(7) |
| C1'-C8' | 1.539(6)  | C1'-B1   | 1.611(5)  | C2'-C3' | 1.3950   |
| C2'-C7' | 1.3951    | C3'-C4'  | 1.3950    | C4'-C5' | 1.3948   |
| C5'-C6' | 1.3950    | C5'-Cl1' | 1.700(11) | C6'-C7' | 1.3951   |

|         |          |         |          |         |          |
|---------|----------|---------|----------|---------|----------|
| C8-C9   | 1.566(4) | C8'-C9  | 1.632(5) | C9-C10  | 1.510(4) |
| C9-C11  | 1.509(4) | C9-C12  | 1.522(3) | C13-C14 | 1.543(3) |
| C13-C15 | 1.528(3) | C13-C16 | 1.498(3) | C14-C17 | 1.493(3) |
| C14-C18 | 1.544(4) |         |          |         |          |

**Table 6 . Bond Angles in Compound 4, °**

|              |            |              |            |             |            |
|--------------|------------|--------------|------------|-------------|------------|
| B1-O1-C14    | 106.11(18) | B1-O2-C13    | 107.7(2)   | C2-C1-B1    | 103.3(3)   |
| C8-C1-C2     | 111.7(3)   | C8-C1-B1     | 111.9(3)   | C3-C2-C1    | 120.0(3)   |
| C3-C2-C7     | 120.0      | C7-C2-C1     | 120.0(3)   | C2-C3-C4    | 120.0      |
| C3-C4-C5     | 120.0      | C4-C5-C11    | 121.6(6)   | C6-C5-C4    | 120.0      |
| C6-C5-C11    | 117.7(6)   | C5-C6-C7     | 120.0      | C6-C7-C2    | 120.0      |
| C2'-C1'-C8'  | 114.1(4)   | C2'-C1'-B1   | 104.9(4)   | C8'-C1'-B1  | 105.4(4)   |
| C3'-C2'-C1'  | 120.0(4)   | C3'-C2'-C7'  | 120.0      | C7'-C2'-C1' | 119.9(4)   |
| C2'-C3'-C4'  | 120.0      | C5'-C4'-C3'  | 120.0      | C4'-C5'-C6' | 120.0      |
| C4'-C5'-C11' | 117.7(7)   | C6'-C5'-C11' | 122.1(7)   | C5'-C6'-C7' | 120.0      |
| C2'-C7'-C6'  | 120.0      | C1-C8-C9     | 112.9(3)   | C1'-C8'-C9  | 110.0(3)   |
| C10-C9-C8    | 94.8(3)    | C10-C9-C8'   | 128.7(3)   | C10-C9-C12  | 109.1(3)   |
| C11-C9-C8    | 125.9(3)   | C11-C9-C8'   | 90.1(3)    | C11-C9-C10  | 107.2(2)   |
| C11-C9-C12   | 109.9(2)   | C12-C9-C8    | 108.2(2)   | C12-C9-C8'  | 109.3(2)   |
| O2-C13-C14   | 101.70(17) | O2-C13-C15   | 107.94(19) | O2-C13-C16  | 108.56(19) |
| C15-C13-C14  | 112.6(2)   | C16-C13-C14  | 115.6(2)   | C16-C13-C15 | 109.8(2)   |
| O1-C14-C13   | 101.83(18) | O1-C14-C17   | 109.14(19) | O1-C14-C18  | 106.91(19) |
| C17-C14-C13  | 117.2(2)   | C17-C14-C18  | 109.5(2)   | C18-C14-C13 | 111.58(19) |
| O1-B1-C1     | 134.6(3)   | O1-B1-C1'    | 106.6(3)   | O2-B1-O1    | 113.10(19) |
| O2-B1-C1     | 112.0(3)   | O2-B1-C1'    | 140.3(3)   |             |            |

This report has been created with Olex2, compiled on 2018.05.29 svn.r3508 for OlexSys.

### X-ray Structure Determination of Compound 55

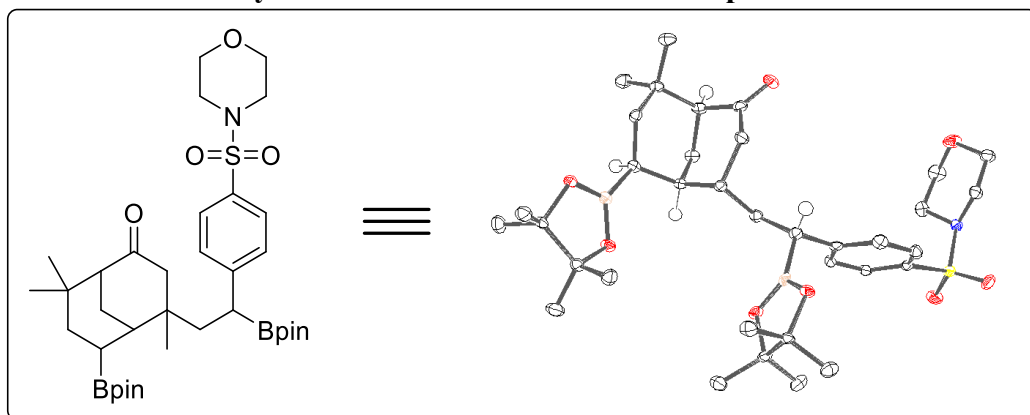

Compound **X**,  $C_{37}H_{59}B_2Cl_2NO_8S$ , crystallizes in the triclinic space group  $P\bar{1}$  with  $a=11.9599(6)\text{\AA}$ ,  $b=13.0727(6)\text{\AA}$ ,  $c=14.6426(7)\text{\AA}$ ,  $\alpha=106.075(2)^\circ$ ,  $\beta=108.081(2)^\circ$ ,  $\gamma=102.136(2)^\circ$ ,  $V=1978.23(17)\text{\AA}^3$ ,  $Z=2$ , and  $d_{\text{calc}}=1.293\text{ g/cm}^3$ . X-ray intensity data were collected on a [1] CMOS area detector employing graphite-monochromated Mo-K $\alpha$  radiation ( $\lambda=0.71073\text{\AA}$ ) at a temperature of 100K. Preliminary indexing was performed from a series of twenty-four  $0.5^\circ$  rotation frames with exposures of 10 seconds. A total of 2460 frames were collected with a crystal to detector distance of 33.0 mm, rotation widths of  $0.5^\circ$  and exposures of 5 seconds:

| scan type | $2\theta$ | $\omega$ | $\varphi$ | $\chi$ | Frames |
|-----------|-----------|----------|-----------|--------|--------|
| $\omega$  | 3.18      | 196.87   | 216.00    | 54.72  | 304    |
| $\omega$  | -46.78    | 146.91   | 259.43    | 54.72  | 304    |
| $\omega$  | 3.18      | 196.87   | 288.00    | 54.72  | 304    |
| $\phi$    | 3.18      | 349.56   | 0.00      | 54.72  | 720    |
| $\omega$  | 3.18      | 196.87   | 0.00      | 54.72  | 304    |
| $\omega$  | 3.18      | 196.87   | 144.00    | 54.72  | 304    |
| $\omega$  | 3.18      | 196.87   | 72.00     | 54.72  | 220    |

Rotation frames were integrated using SAINT, producing a listing of unaveraged  $F^2$  and  $\sigma(F^2)$  values. A total of 81673 reflections were measured over the ranges  $5.798 \leq 2\theta \leq 50.866^\circ$ ,  $-14 \leq h \leq 14$ ,  $-15 \leq k \leq 15$ ,  $-17 \leq l \leq 17$  yielding 7288 unique reflections ( $R_{\text{int}} = 0.0625$ ). The intensity data were corrected for Lorentz and polarization effects and for absorption using SADABS (minimum and maximum transmission 0.7205, 0.7452). The structure was solved by direct methods - ShelXT. Refinement was by



full-matrix least squares based on  $F^2$  using SHELXL-2018. All reflections were used during refinement. The weighting scheme used was  $w=1/[\sigma^2(F_o^2) + (0.0294P)^2 + 1.6812P]$  where  $P = (F_o^2 + 2F_c^2)/3$ . Non-hydrogen atoms were refined anisotropically and hydrogen atoms were refined using a riding model. Refinement converged to  $R1=0.0374$  and  $wR2=0.0799$  for 6117 observed reflections for which  $F > 4\sigma(F)$  and  $R1=0.0489$  and  $wR2=0.0856$  and  $GOF = 1.037$  for all 7288 unique, non-zero reflections and 471 variables. The maximum  $\Delta/\sigma$  in the final cycle of least squares was 0.001 and the two most prominent peaks in the final difference Fourier were  $+0.39$  and  $-0.34 \text{ e}/\text{\AA}^3$ .

Table 1. lists cell information, data collection parameters, and refinement data. Final positional and equivalent isotropic thermal parameters are given in Tables 2. and 3. Anisotropic thermal parameters are in Table 4. Tables 5. and 6. list bond distances and bond angles. Figure 1. is an ORTEP representation of the molecule with 50% probability thermal ellipsoids displayed.

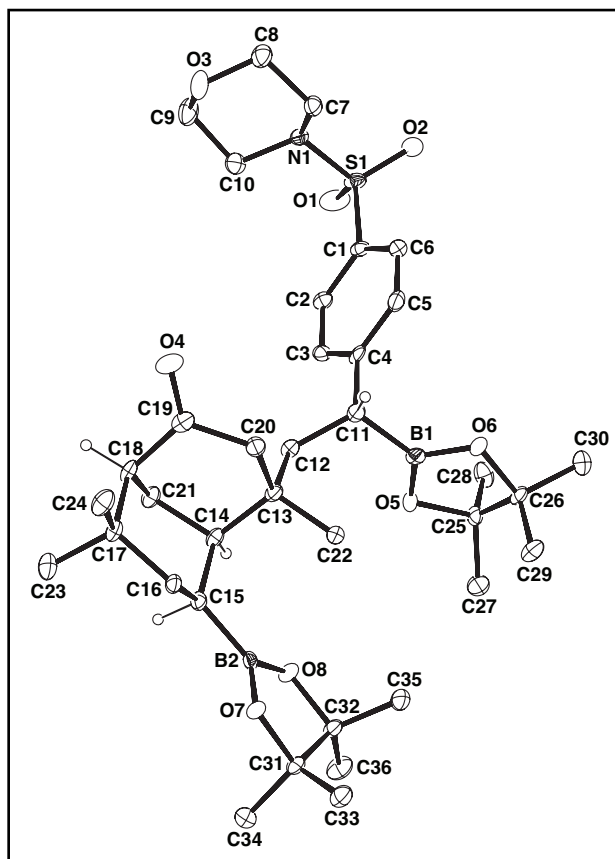

Figure 1. ORTEP drawing of the title compound with 50% thermal ellipsoids.

**Table 1. Summary of Structure Determination of Compound 55**

|                                   |                                                                                  |
|-----------------------------------|----------------------------------------------------------------------------------|
| Empirical formula                 | C <sub>37</sub> H <sub>59</sub> B <sub>2</sub> Cl <sub>2</sub> NO <sub>8</sub> S |
| Formula weight                    | 770.43                                                                           |
| Temperature/K                     | 100                                                                              |
| Crystal system                    | triclinic                                                                        |
| Space group                       | PT                                                                               |
| a                                 | 11.9599(6)Å                                                                      |
| b                                 | 13.0727(6)Å                                                                      |
| c                                 | 14.6426(7)Å                                                                      |
| α                                 | 106.075(2)°                                                                      |
| β                                 | 108.081(2)°                                                                      |
| γ                                 | 102.136(2)°                                                                      |
| Volume                            | 1978.23(17)Å <sup>3</sup>                                                        |
| Z                                 | 2                                                                                |
| d <sub>calc</sub>                 | 1.293 g/cm <sup>3</sup>                                                          |
| μ                                 | 0.267 mm <sup>-1</sup>                                                           |
| F(000)                            | 824.0                                                                            |
| Crystal size, mm                  | 0.25 × 0.12 × 0.1                                                                |
| 2θ range for data collection      | 5.798 - 50.866°                                                                  |
| Index ranges                      | -14 ≤ h ≤ 14, -15 ≤ k ≤ 15, -17 ≤ l ≤ 17                                         |
| Reflections collected             | 81673                                                                            |
| Independent reflections           | 7288[R(int) = 0.0625]                                                            |
| Data/restraints/parameters        | 7288/0/471                                                                       |
| Goodness-of-fit on F <sup>2</sup> | 1.037                                                                            |
| Final R indexes [I ≥ 2σ (I)]      | R <sub>1</sub> = 0.0374, wR <sub>2</sub> = 0.0799                                |
| Final R indexes [all data]        | R <sub>1</sub> = 0.0489, wR <sub>2</sub> = 0.0856                                |
| Largest diff. peak/hole           | 0.39/-0.34 eÅ <sup>-3</sup>                                                      |

**Table 2 . Refined Positional Parameters for Compound 55**

| Atom | x            | y           | z            | U(eq)       |
|------|--------------|-------------|--------------|-------------|
| C11  | 0.94031(5)   | 0.81099(5)  | 0.32619(4)   | 0.03656(14) |
| C12  | 0.68381(4)   | 0.66348(4)  | 0.21230(4)   | 0.02620(12) |
| S1   | 0.41138(4)   | 0.87086(4)  | 0.07484(4)   | 0.01827(11) |
| O1   | 0.38549(13)  | 0.95070(11) | 0.14791(12)  | 0.0278(3)   |
| O2   | 0.34689(12)  | 0.84223(12) | -0.03382(11) | 0.0258(3)   |
| O3   | 0.81562(12)  | 0.94695(12) | 0.15394(10)  | 0.0265(3)   |
| O4   | 0.80335(12)  | 0.46697(11) | 0.29010(11)  | 0.0253(3)   |
| O5   | 0.17240(11)  | 0.39448(10) | 0.19654(9)   | 0.0160(3)   |
| O6   | 0.15777(11)  | 0.30999(10) | 0.03214(9)   | 0.0152(3)   |
| O7   | 0.43926(10)  | 0.09969(10) | 0.43196(9)   | 0.0155(3)   |
| O8   | 0.33107(11)  | 0.22382(10) | 0.42726(9)   | 0.0162(3)   |
| N1   | 0.56015(13)  | 0.91989(12) | 0.10064(11)  | 0.0154(3)   |
| C1   | 0.38864(15)  | 0.74484(15) | 0.09907(14)  | 0.0150(4)   |
| C2   | 0.40063(16)  | 0.74860(15) | 0.19751(14)  | 0.0157(4)   |
| C3   | 0.39434(16)  | 0.65121(15) | 0.21907(14)  | 0.0164(4)   |
| C4   | 0.37941(15)  | 0.55034(14) | 0.14392(14)  | 0.0147(4)   |
| C5   | 0.36460(16)  | 0.54883(15) | 0.04539(14)  | 0.0182(4)   |
| C6   | 0.36832(16)  | 0.64428(15) | 0.02211(14)  | 0.0179(4)   |
| C7   | 0.60402(16)  | 0.85434(15) | 0.02822(14)  | 0.0181(4)   |
| C8   | 0.73515(17)  | 0.92033(17) | 0.05001(15)  | 0.0222(4)   |
| C9   | 0.77454(19)  | 1.01564(17) | 0.22136(16)  | 0.0276(5)   |
| C10  | 0.64530(17)  | 0.95443(15) | 0.20923(14)  | 0.0199(4)   |
| C11  | 0.37627(16)  | 0.44256(14) | 0.16563(14)  | 0.0153(4)   |
| C12  | 0.45688(16)  | 0.46474(14) | 0.27807(13)  | 0.0148(4)   |
| C13  | 0.49866(15)  | 0.36513(14) | 0.29737(14)  | 0.0141(4)   |
| C14  | 0.54755(15)  | 0.39454(14) | 0.41600(13)  | 0.0135(4)   |
| C15  | 0.56325(15)  | 0.29844(14) | 0.45573(13)  | 0.0136(4)   |
| C16  | 0.66347(15)  | 0.25329(14) | 0.43241(14)  | 0.0145(4)   |
| C17  | 0.78885(15)  | 0.34564(14) | 0.46783(14)  | 0.0149(4)   |
| C18  | 0.77081(15)  | 0.44890(14) | 0.43874(14)  | 0.0159(4)   |
| C19  | 0.73226(16)  | 0.42661(15) | 0.32480(15)  | 0.0172(4)   |
| C20  | 0.60074(16)  | 0.35258(15) | 0.25463(14)  | 0.0170(4)   |
| C21  | 0.67286(16)  | 0.49039(14) | 0.47152(14)  | 0.0164(4)   |
| C22  | 0.38814(16)  | 0.25571(14) | 0.23958(13)  | 0.0148(4)   |
| C23  | 0.85718(17)  | 0.38588(17) | 0.58548(15)  | 0.0231(4)   |
| C24  | 0.87000(17)  | 0.29592(16) | 0.41816(15)  | 0.0215(4)   |
| C25  | 0.03859(15)  | 0.34959(15) | 0.13160(13)  | 0.0151(4)   |
| C26  | 0.03326(15)  | 0.26468(15) | 0.03007(14)  | 0.0150(4)   |
| C27  | -0.02948(17) | 0.29815(17) | 0.18810(15)  | 0.0225(4)   |
| C28  | 0.00109(18)  | 0.45001(16) | 0.11746(15)  | 0.0219(4)   |
| C29  | 0.01794(17)  | 0.14607(15) | 0.02942(15)  | 0.0206(4)   |
| C30  | -0.06064(17) | 0.26030(16) | -0.06956(14) | 0.0211(4)   |

|     |             |              |             |           |
|-----|-------------|--------------|-------------|-----------|
| C31 | 0.32204(15) | 0.04560(15)  | 0.43703(14) | 0.0152(4) |
| C32 | 0.23873(16) | 0.11535(15)  | 0.40015(14) | 0.0160(4) |
| C33 | 0.27799(17) | -0.07765(15) | 0.36878(15) | 0.0194(4) |
| C34 | 0.35093(18) | 0.05836(17)  | 0.54898(14) | 0.0223(4) |
| C35 | 0.16604(17) | 0.06829(16)  | 0.28360(15) | 0.0216(4) |
| C36 | 0.15272(18) | 0.13660(17)  | 0.45496(16) | 0.0245(4) |
| C37 | 0.83790(18) | 0.68845(18)  | 0.22022(17) | 0.0289(5) |
| B1  | 0.23299(18) | 0.37867(16)  | 0.13167(16) | 0.0149(4) |
| B2  | 0.44155(18) | 0.20522(17)  | 0.43478(15) | 0.0137(4) |

**Table 3 . Positional Parameters for Hydrogens in Compound 55**

| Atom | <i>x</i> | <i>y</i> | <i>z</i>  | U(eq) |
|------|----------|----------|-----------|-------|
| H2   | 0.413016 | 0.817206 | 0.249541  | 0.019 |
| H3   | 0.400256 | 0.653026 | 0.285751  | 0.02  |
| H5   | 0.351629 | 0.480325 | -0.007048 | 0.022 |
| H6   | 0.357112 | 0.641432 | -0.045789 | 0.022 |
| H7a  | 0.549075 | 0.838966 | -0.043746 | 0.022 |
| H7b  | 0.601831 | 0.781417 | 0.036544  | 0.022 |
| H8a  | 0.765857 | 0.875709 | 0.002659  | 0.027 |
| H8b  | 0.735685 | 0.990746 | 0.036918  | 0.027 |
| H9a  | 0.774246 | 1.084902 | 0.206295  | 0.033 |
| H9b  | 0.83313  | 1.038049 | 0.293709  | 0.033 |
| H10a | 0.645682 | 0.887436 | 0.228228  | 0.024 |
| H10b | 0.617558 | 1.004565 | 0.255293  | 0.024 |
| H11  | 0.408013 | 0.396037 | 0.119457  | 0.018 |
| H12a | 0.409853 | 0.485714 | 0.321213  | 0.018 |
| H12b | 0.532107 | 0.530222 | 0.301859  | 0.018 |
| H14  | 0.486593 | 0.423641 | 0.439904  | 0.016 |
| H15  | 0.600591 | 0.337206 | 0.532593  | 0.016 |
| H16a | 0.632819 | 0.211887 | 0.357033  | 0.017 |
| H16b | 0.677309 | 0.199113 | 0.466932  | 0.017 |
| H18  | 0.851938 | 0.511551 | 0.476404  | 0.019 |
| H20a | 0.598707 | 0.273224 | 0.236408  | 0.02  |
| H20b | 0.57869  | 0.3679   | 0.189902  | 0.02  |
| H21a | 0.698839 | 0.513207 | 0.547288  | 0.02  |
| H21b | 0.664624 | 0.556498 | 0.452924  | 0.02  |
| H22a | 0.414322 | 0.19352  | 0.253569  | 0.022 |
| H22b | 0.358457 | 0.240036 | 0.165183  | 0.022 |
| H22c | 0.320969 | 0.263607 | 0.26303   | 0.022 |
| H23a | 0.867406 | 0.321437 | 0.604932  | 0.035 |
| H23b | 0.808679 | 0.42113  | 0.619423  | 0.035 |
| H23c | 0.939093 | 0.44077  | 0.6072    | 0.035 |

|      |           |           |           |       |
|------|-----------|-----------|-----------|-------|
| H24a | 0.949962  | 0.354028  | 0.440685  | 0.032 |
| H24b | 0.827953  | 0.268624  | 0.342781  | 0.032 |
| H24c | 0.884131  | 0.233227  | 0.439163  | 0.032 |
| H27a | 0.005126  | 0.241538  | 0.206386  | 0.034 |
| H27b | -0.118002 | 0.262468  | 0.143341  | 0.034 |
| H27c | -0.019581 | 0.357172  | 0.251121  | 0.034 |
| H28a | 0.019197  | 0.505739  | 0.185141  | 0.033 |
| H28b | -0.088118 | 0.425168  | 0.075097  | 0.033 |
| H28c | 0.047989  | 0.483919  | 0.08301   | 0.033 |
| H29a | 0.025816  | 0.099847  | -0.032098 | 0.031 |
| H29b | -0.064257 | 0.113279  | 0.028379  | 0.031 |
| H29c | 0.082395  | 0.148581  | 0.091545  | 0.031 |
| H30a | -0.043479 | 0.33541   | -0.073214 | 0.032 |
| H30b | -0.144661 | 0.235126  | -0.071174 | 0.032 |
| H30c | -0.054444 | 0.207523  | -0.128623 | 0.032 |
| H33a | 0.27253   | -0.084229 | 0.299093  | 0.029 |
| H33b | 0.195893  | -0.114918 | 0.365497  | 0.029 |
| H33c | 0.337061  | -0.113487 | 0.397599  | 0.029 |
| H34a | 0.415962  | 0.025452  | 0.571758  | 0.033 |
| H34b | 0.275688  | 0.019466  | 0.555174  | 0.033 |
| H34c | 0.37978   | 0.138392  | 0.592229  | 0.033 |
| H35a | 0.131419  | 0.123883  | 0.263046  | 0.032 |
| H35b | 0.098277  | -0.000863 | 0.264007  | 0.032 |
| H35c | 0.221649  | 0.051586  | 0.248756  | 0.032 |
| H36a | 0.201903  | 0.177715  | 0.529069  | 0.037 |
| H36b | 0.095488  | 0.064549  | 0.444207  | 0.037 |
| H36c | 0.105066  | 0.181291  | 0.427095  | 0.037 |
| H37A | 0.86455   | 0.623249  | 0.227099  | 0.035 |
| H37B | 0.841362  | 0.696306  | 0.155729  | 0.035 |

**Table 4 . Refined Thermal Parameters (U's) for Compound 55**

| Atom | U <sub>11</sub> | U <sub>22</sub> | U <sub>33</sub> | U <sub>23</sub> | U <sub>13</sub> | U <sub>12</sub> |
|------|-----------------|-----------------|-----------------|-----------------|-----------------|-----------------|
| C11  | 0.0188(3)       | 0.0411(3)       | 0.0360(3)       | 0.0077(3)       | 0.0057(2)       | -0.0006(2)      |
| C12  | 0.0139(2)       | 0.0289(3)       | 0.0354(3)       | 0.0130(2)       | 0.0098(2)       | 0.00451(19)     |
| S1   | 0.0154(2)       | 0.0204(2)       | 0.0276(3)       | 0.0166(2)       | 0.0107(2)       | 0.00872(18)     |
| O1   | 0.0315(8)       | 0.0249(7)       | 0.0468(9)       | 0.0218(7)       | 0.0265(7)       | 0.0193(6)       |
| O2   | 0.0157(7)       | 0.0349(8)       | 0.0309(8)       | 0.0242(7)       | 0.0046(6)       | 0.0066(6)       |
| O3   | 0.0140(7)       | 0.0306(8)       | 0.0241(7)       | 0.0025(6)       | 0.0013(6)       | 0.0055(6)       |
| O4   | 0.0188(7)       | 0.0303(8)       | 0.0355(8)       | 0.0182(7)       | 0.0170(6)       | 0.0074(6)       |
| O5   | 0.0104(6)       | 0.0179(6)       | 0.0151(6)       | 0.0055(5)       | 0.0006(5)       | 0.0026(5)       |
| O6   | 0.0100(6)       | 0.0151(6)       | 0.0182(7)       | 0.0053(5)       | 0.0052(5)       | 0.0014(5)       |
| O7   | 0.0096(6)       | 0.0172(6)       | 0.0209(7)       | 0.0096(5)       | 0.0061(5)       | 0.0027(5)       |
| O8   | 0.0129(6)       | 0.0129(6)       | 0.0222(7)       | 0.0060(5)       | 0.0078(5)       | 0.0023(5)       |
| N1   | 0.0143(7)       | 0.0158(8)       | 0.0171(8)       | 0.0080(6)       | 0.0065(6)       | 0.0040(6)       |
| C1   | 0.0110(8)       | 0.0170(9)       | 0.0220(10)      | 0.0126(8)       | 0.0074(7)       | 0.0058(7)       |
| C2   | 0.0131(9)       | 0.0164(9)       | 0.0201(10)      | 0.0072(8)       | 0.0085(8)       | 0.0058(7)       |
| C3   | 0.0125(8)       | 0.0226(10)      | 0.0171(9)       | 0.0113(8)       | 0.0068(7)       | 0.0051(7)       |
| C4   | 0.0047(8)       | 0.0154(9)       | 0.0221(10)      | 0.0079(8)       | 0.0035(7)       | 0.0012(7)       |
| C5   | 0.0139(9)       | 0.0160(9)       | 0.0177(9)       | 0.0031(8)       | 0.0030(8)       | 0.0003(7)       |
| C6   | 0.0146(9)       | 0.0215(10)      | 0.0161(9)       | 0.0084(8)       | 0.0051(8)       | 0.0022(7)       |
| C7   | 0.0161(9)       | 0.0205(9)       | 0.0144(9)       | 0.0036(8)       | 0.0056(8)       | 0.0039(8)       |
| C8   | 0.0157(9)       | 0.0269(10)      | 0.0225(10)      | 0.0070(8)       | 0.0080(8)       | 0.0061(8)       |
| C9   | 0.0237(11)      | 0.0223(10)      | 0.0223(11)      | -0.0018(9)      | 0.0038(9)       | 0.0005(8)       |
| C10  | 0.0241(10)      | 0.0155(9)       | 0.0163(9)       | 0.0025(8)       | 0.0073(8)       | 0.0043(8)       |
| C11  | 0.0136(9)       | 0.0140(9)       | 0.0171(9)       | 0.0057(7)       | 0.0052(7)       | 0.0036(7)       |
| C12  | 0.0127(8)       | 0.0133(9)       | 0.0171(9)       | 0.0050(7)       | 0.0058(7)       | 0.0030(7)       |
| C13  | 0.0102(8)       | 0.0134(9)       | 0.0190(9)       | 0.0078(7)       | 0.0051(7)       | 0.0030(7)       |
| C14  | 0.0102(8)       | 0.0115(8)       | 0.0175(9)       | 0.0029(7)       | 0.0061(7)       | 0.0033(7)       |
| C15  | 0.0122(8)       | 0.0153(9)       | 0.0107(8)       | 0.0027(7)       | 0.0039(7)       | 0.0027(7)       |
| C16  | 0.0104(8)       | 0.0140(9)       | 0.0162(9)       | 0.0066(7)       | 0.0016(7)       | 0.0025(7)       |
| C17  | 0.0091(8)       | 0.0146(9)       | 0.0176(9)       | 0.0040(7)       | 0.0037(7)       | 0.0021(7)       |
| C18  | 0.0086(8)       | 0.0124(9)       | 0.0205(10)      | 0.0021(7)       | 0.0035(7)       | -0.0001(7)      |
| C19  | 0.0146(9)       | 0.0144(9)       | 0.0268(10)      | 0.0097(8)       | 0.0100(8)       | 0.0075(7)       |
| C20  | 0.0134(9)       | 0.0226(10)      | 0.0156(9)       | 0.0072(8)       | 0.0068(7)       | 0.0053(7)       |
| C21  | 0.0145(9)       | 0.0117(9)       | 0.0192(9)       | 0.0024(7)       | 0.0056(8)       | 0.0028(7)       |
| C22  | 0.0132(9)       | 0.0151(9)       | 0.0145(9)       | 0.0062(7)       | 0.0040(7)       | 0.0028(7)       |
| C23  | 0.0139(9)       | 0.0268(11)      | 0.0219(10)      | 0.0068(8)       | 0.0018(8)       | 0.0046(8)       |
| C24  | 0.0134(9)       | 0.0194(10)      | 0.0303(11)      | 0.0069(8)       | 0.0084(8)       | 0.0057(8)       |
| C25  | 0.0093(8)       | 0.0176(9)       | 0.0162(9)       | 0.0065(7)       | 0.0019(7)       | 0.0047(7)       |
| C26  | 0.0076(8)       | 0.0156(9)       | 0.0203(9)       | 0.0066(7)       | 0.0051(7)       | 0.0016(7)       |
| C27  | 0.0174(10)      | 0.0276(11)      | 0.0242(10)      | 0.0106(9)       | 0.0105(8)       | 0.0057(8)       |
| C28  | 0.0238(10)      | 0.0225(10)      | 0.0178(10)      | 0.0056(8)       | 0.0039(8)       | 0.0128(8)       |
| C29  | 0.0163(9)       | 0.0145(9)       | 0.0293(11)      | 0.0078(8)       | 0.0087(8)       | 0.0029(7)       |
| C30  | 0.0168(9)       | 0.0233(10)      | 0.0181(10)      | 0.0052(8)       | 0.0027(8)       | 0.0064(8)       |

|     |            |            |            |            |           |           |
|-----|------------|------------|------------|------------|-----------|-----------|
| C31 | 0.0091(8)  | 0.0188(9)  | 0.0185(9)  | 0.0085(8)  | 0.0063(7) | 0.0024(7) |
| C32 | 0.0115(8)  | 0.0145(9)  | 0.0211(10) | 0.0071(8)  | 0.0064(7) | 0.0017(7) |
| C33 | 0.0153(9)  | 0.0180(9)  | 0.0244(10) | 0.0082(8)  | 0.0077(8) | 0.0040(7) |
| C34 | 0.0209(10) | 0.0261(10) | 0.0184(10) | 0.0110(8)  | 0.0060(8) | 0.0036(8) |
| C35 | 0.0138(9)  | 0.0231(10) | 0.0241(10) | 0.0123(8)  | 0.0019(8) | 0.0023(8) |
| C36 | 0.0176(10) | 0.0255(11) | 0.0349(12) | 0.0117(9)  | 0.0151(9) | 0.0077(8) |
| C37 | 0.0165(10) | 0.0339(12) | 0.0322(12) | 0.0064(10) | 0.0124(9) | 0.0039(9) |
| B1  | 0.0149(10) | 0.0118(9)  | 0.0213(11) | 0.0111(8)  | 0.0056(9) | 0.0062(8) |
| B2  | 0.0114(9)  | 0.0184(10) | 0.0075(9)  | 0.0033(8)  | 0.0021(8) | 0.0023(8) |

**Table 5 . Bond Distances in Compound 55, Å**

|         |            |         |            |         |            |
|---------|------------|---------|------------|---------|------------|
| C11-C37 | 1.759(2)   | C12-C37 | 1.7635(19) | S1-O1   | 1.4328(14) |
| S1-O2   | 1.4330(14) | S1-N1   | 1.6397(15) | S1-C1   | 1.7632(17) |
| O3-C8   | 1.421(2)   | O3-C9   | 1.421(2)   | O4-C19  | 1.220(2)   |
| O5-C25  | 1.470(2)   | O5-B1   | 1.361(2)   | O6-C26  | 1.470(2)   |
| O6-B1   | 1.364(2)   | O7-C31  | 1.465(2)   | O7-B2   | 1.363(2)   |
| O8-C32  | 1.465(2)   | O8-B2   | 1.370(2)   | N1-C7   | 1.472(2)   |
| N1-C10  | 1.474(2)   | C1-C2   | 1.389(2)   | C1-C6   | 1.390(3)   |
| C2-C3   | 1.387(2)   | C3-C4   | 1.399(3)   | C4-C5   | 1.392(3)   |
| C4-C11  | 1.523(2)   | C5-C6   | 1.377(3)   | C7-C8   | 1.508(2)   |
| C9-C10  | 1.514(3)   | C11-C12 | 1.535(2)   | C11-B1  | 1.588(3)   |
| C12-C13 | 1.554(2)   | C13-C14 | 1.553(2)   | C13-C20 | 1.553(2)   |
| C13-C22 | 1.533(2)   | C14-C15 | 1.545(2)   | C14-C21 | 1.539(2)   |
| C15-C16 | 1.530(2)   | C15-B2  | 1.571(2)   | C16-C17 | 1.544(2)   |
| C17-C18 | 1.560(2)   | C17-C23 | 1.535(3)   | C17-C24 | 1.528(2)   |
| C18-C19 | 1.509(3)   | C18-C21 | 1.539(2)   | C19-C20 | 1.508(2)   |
| C25-C26 | 1.563(2)   | C25-C27 | 1.515(2)   | C25-C28 | 1.519(2)   |
| C26-C29 | 1.520(2)   | C26-C30 | 1.517(2)   | C31-C32 | 1.561(2)   |
| C31-C33 | 1.516(2)   | C31-C34 | 1.519(2)   | C32-C35 | 1.523(3)   |
| C32-C36 | 1.513(2)   |         |            |         |            |

**Table 6 . Bond Angles in Compound 55, °**

|             |            |             |            |             |            |
|-------------|------------|-------------|------------|-------------|------------|
| O1-S1-O2    | 120.28(9)  | O1-S1-N1    | 106.83(8)  | O1-S1-C1    | 108.30(8)  |
| O2-S1-N1    | 106.79(8)  | O2-S1-C1    | 107.63(8)  | N1-S1-C1    | 106.22(8)  |
| C9-O3-C8    | 109.07(14) | B1-O5-C25   | 106.91(13) | B1-O6-C26   | 107.23(13) |
| B2-O7-C31   | 107.57(13) | B2-O8-C32   | 107.51(13) | C7-N1-S1    | 115.41(12) |
| C7-N1-C10   | 112.18(14) | C10-N1-S1   | 116.25(12) | C2-C1-S1    | 119.40(14) |
| C2-C1-C6    | 120.58(16) | C6-C1-S1    | 119.84(13) | C3-C2-C1    | 119.35(17) |
| C2-C3-C4    | 120.87(16) | C3-C4-C11   | 122.43(16) | C5-C4-C3    | 118.27(16) |
| C5-C4-C11   | 119.29(16) | C6-C5-C4    | 121.58(17) | C5-C6-C1    | 119.26(17) |
| N1-C7-C8    | 109.10(15) | O3-C8-C7    | 111.21(15) | O3-C9-C10   | 111.39(15) |
| N1-C10-C9   | 108.45(15) | C4-C11-C12  | 112.83(14) | C4-C11-B1   | 104.65(13) |
| C12-C11-B1  | 114.08(14) | C11-C12-C13 | 115.69(14) | C14-C13-C12 | 106.31(14) |
| C20-C13-C12 | 108.75(14) | C20-C13-C14 | 112.27(14) | C22-C13-C12 | 109.76(14) |
| C22-C13-C14 | 111.33(14) | C22-C13-C20 | 108.38(14) | C15-C14-C13 | 117.60(14) |
| C21-C14-C13 | 110.85(14) | C21-C14-C15 | 107.39(14) | C14-C15-B2  | 117.29(14) |
| C16-C15-C14 | 112.05(14) | C16-C15-B2  | 114.57(14) | C15-C16-C17 | 113.82(14) |
| C16-C17-C18 | 111.83(14) | C23-C17-C16 | 109.63(14) | C23-C17-C18 | 108.67(14) |
| C24-C17-C16 | 109.07(14) | C24-C17-C18 | 109.79(14) | C24-C17-C23 | 107.77(15) |
| C19-C18-C17 | 113.82(14) | C19-C18-C21 | 107.20(14) | C21-C18-C17 | 111.99(14) |
| O4-C19-C18  | 122.00(16) | O4-C19-C20  | 120.80(17) | C20-C19-C18 | 117.19(15) |
| C19-C20-C13 | 116.80(15) | C14-C21-C18 | 108.83(14) | O5-C25-C26  | 102.43(13) |
| O5-C25-C27  | 108.64(14) | O5-C25-C28  | 105.78(14) | C27-C25-C26 | 115.31(15) |
| C27-C25-C28 | 110.45(15) | C28-C25-C26 | 113.37(14) | O6-C26-C25  | 102.54(13) |
| O6-C26-C29  | 107.25(13) | O6-C26-C30  | 107.44(14) | C29-C26-C25 | 113.77(15) |
| C30-C26-C25 | 115.53(14) | C30-C26-C29 | 109.58(15) | O7-C31-C32  | 102.53(13) |
| O7-C31-C33  | 107.42(14) | O7-C31-C34  | 106.78(14) | C33-C31-C32 | 115.73(15) |
| C33-C31-C34 | 110.36(15) | C34-C31-C32 | 113.17(15) | O8-C32-C31  | 102.20(13) |
| O8-C32-C35  | 107.69(14) | O8-C32-C36  | 107.74(14) | C35-C32-C31 | 113.04(15) |
| C36-C32-C31 | 115.46(15) | C36-C32-C35 | 110.02(15) | C11-C37-C12 | 111.41(11) |
| O5-B1-O6    | 114.12(16) | O5-B1-C11   | 123.28(17) | O6-B1-C11   | 122.39(16) |
| O7-B2-O8    | 113.14(15) | O7-B2-C15   | 122.56(16) | O8-B2-C15   | 124.04(16) |



## X-ray Structure Determination of Compound S15

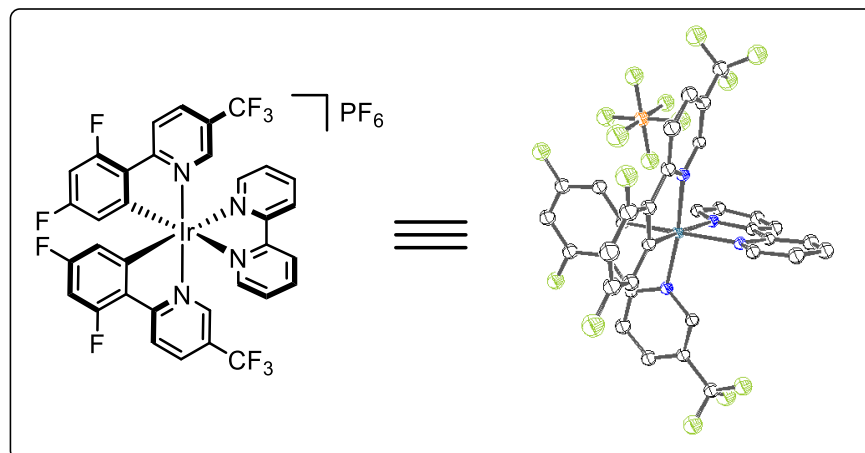

Compound S15,  $C_{77}H_{54}F_{32}Ir_2N_8O_3P_2$ , crystallizes in the triclinic space group PT with  $a=11.4834(8)\text{\AA}$ ,  $b=13.1501(9)\text{\AA}$ ,  $c=14.4544(10)\text{\AA}$ ,  $\alpha=72.640(2)^\circ$ ,  $\beta=89.929(2)^\circ$ ,  $\gamma=77.252(2)^\circ$ ,  $V=2027.1(2)\text{\AA}^3$ ,  $Z=1$ , and  $d_{\text{calc}}=1.797\text{ g/cm}^3$ . X-ray intensity data were collected on a Bruker D8QUEST [1] CMOS area detector employing graphite-monochromated Mo-K $\alpha$  radiation ( $\lambda=0.71073\text{\AA}$ ) at a temperature of 100K. Preliminary indexing was performed from a series of twenty-four  $0.5^\circ$  rotation frames with exposures of 10 seconds. A total of 2448 frames were collected with a crystal to detector distance of 60.0 mm, rotation widths of  $0.5^\circ$  and exposures of 4 seconds:

| scan type | 2 $\theta$ | $\omega$ | $\phi$ | $\chi$ | Frames |
|-----------|------------|----------|--------|--------|--------|
| $\omega$  | 22.35      | 190.09   | 255.00 | 54.72  | 408    |
| $\omega$  | 22.35      | 190.09   | 0.00   | 54.72  | 408    |
| $\omega$  | 22.35      | 190.09   | 153.00 | 54.72  | 408    |
| $\omega$  | 22.35      | 190.09   | 51.00  | 54.72  | 408    |
| $\omega$  | 22.35      | 190.09   | 306.00 | 54.72  | 408    |
| $\omega$  | 22.35      | 190.09   | 204.00 | 54.72  | 408    |

Rotation frames were integrated using SAINT [2], producing a listing of unaveraged  $F^2$  and  $\sigma(F^2)$  values. A total of 51347 reflections were measured over the ranges  $5.84 \leq 2\theta \leq 55.174^\circ$ ,  $-14 \leq h \leq 14$ ,  $-17 \leq k \leq 17$ ,  $-18 \leq l \leq 18$  yielding 9324 unique reflections ( $R_{\text{int}} = 0.0356$ ). The intensity data were corrected for Lorentz and polarization effects and for absorption using SADABS [3] (minimum and maximum transmission 0.7456, 0.6399). The structure was solved by direct methods - ShelXT [4]. Refinement was by full-matrix least squares based on  $F^2$  using SHELXL-2017 [5]. All reflections were used during refinement. The weighting scheme used was  $w=1/[\sigma^2(F_o^2) + (0.0001P)^2 + 28.5043P]$  where  $P = (F_o^2 + 2F_c^2)/3$ . Non-hydrogen atoms were refined anisotropically and hydrogen atoms were refined using a riding model. Refinement converged to  $R1=0.0478$  and  $wR2=0.1216$  for 8590 observed reflections for which  $F > 4\sigma(F)$  and  $R1=0.0532$  and  $wR2=0.1246$  and  $GOF = 1.275$  for all 9324 unique, non-zero reflections and 565 variables. The maximum  $\Delta/\sigma$  in the final cycle of least squares was 0.001 and the two most prominent peaks in the final difference Fourier were  $+3.98$  and  $-2.21 \text{ e}/\text{\AA}^3$ .

Table 1. lists cell information, data collection parameters, and refinement data. Final positional and equivalent isotropic thermal parameters are given in Tables 2. and 3. Anisotropic thermal parameters are in Table 4. Tables 5. and 6. list bond distances and bond angles. Figure 1. is an ORTEP representation of the molecule with 50% probability thermal ellipsoids displayed.

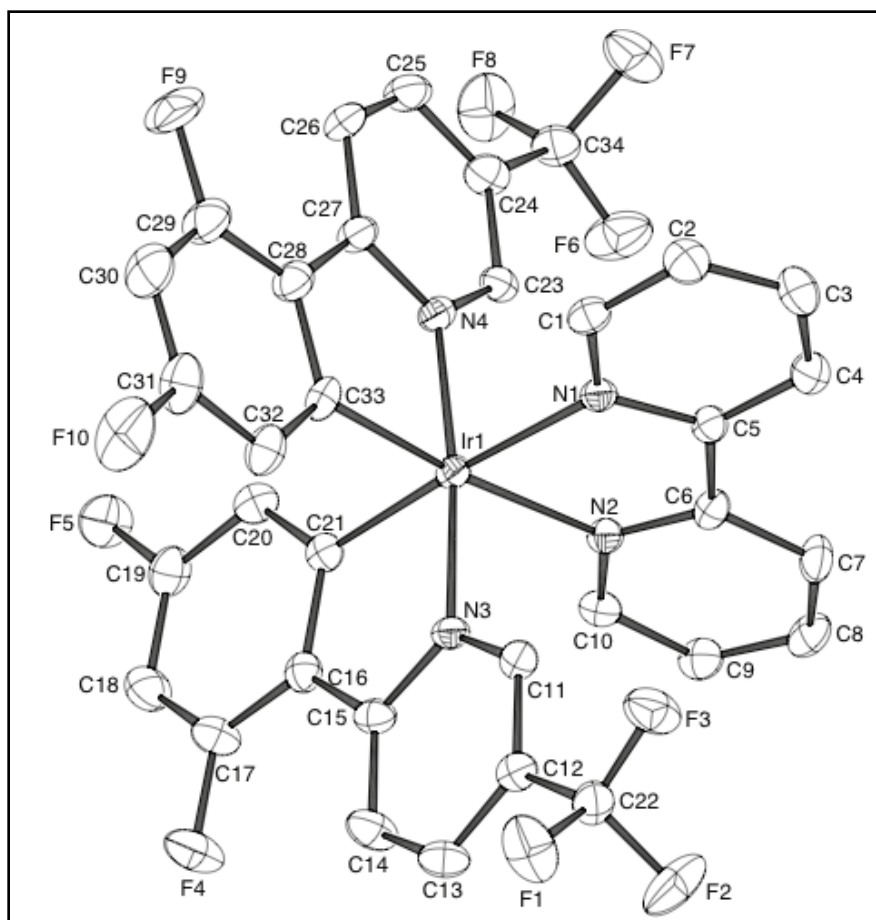

Figure 1. ORTEP drawing of the title compound (**S15**) with 50% thermal ellipsoids.

**Table 1. Summary of Structure Determination of Compound S15**

|                                      |                                                                                                              |
|--------------------------------------|--------------------------------------------------------------------------------------------------------------|
| Empirical formula                    | C <sub>77</sub> H <sub>54</sub> F <sub>32</sub> Ir <sub>2</sub> N <sub>8</sub> O <sub>3</sub> P <sub>2</sub> |
| Formula weight                       | 2193.62                                                                                                      |
| Temperature/K                        | 100                                                                                                          |
| Crystal system                       | triclinic                                                                                                    |
| Space group                          | P $\bar{1}$                                                                                                  |
| a                                    | 11.4834(8)Å                                                                                                  |
| b                                    | 13.1501(9)Å                                                                                                  |
| c                                    | 14.4544(10)Å                                                                                                 |
| $\alpha$                             | 72.640(2)°                                                                                                   |
| $\beta$                              | 89.929(2)°                                                                                                   |
| $\gamma$                             | 77.252(2)°                                                                                                   |
| Volume                               | 2027.1(2)Å <sup>3</sup>                                                                                      |
| Z                                    | 1                                                                                                            |
| d <sub>calc</sub>                    | 1.797 g/cm <sup>3</sup>                                                                                      |
| $\mu$                                | 3.445 mm <sup>-1</sup>                                                                                       |
| F(000)                               | 1068.0                                                                                                       |
| Crystal size, mm                     | 0.3 × 0.25 × 0.2                                                                                             |
| 2 $\theta$ range for data collection | 5.84 - 55.174°                                                                                               |
| Index ranges                         | -14 ≤ h ≤ 14, -17 ≤ k ≤ 17, -18 ≤ l ≤ 18                                                                     |
| Reflections collected                | 51347                                                                                                        |
| Independent reflections              | 9324[R(int) = 0.0356]                                                                                        |
| Data/restraints/parameters           | 9324/0/565                                                                                                   |
| Goodness-of-fit on F <sup>2</sup>    | 1.275                                                                                                        |

Final R indexes [ $I \geq 2\sigma(I)$ ]  $R_1 = 0.0478$ ,  $wR_2 = 0.1216$

Final R indexes [all data]  $R_1 = 0.0532$ ,  $wR_2 = 0.1246$

Largest diff. peak/hole  $3.98/-2.21 \text{ e}\text{\AA}^{-3}$

**Table 2 . Refined Positional Parameters for Compound S15**

| Atom | x          | y          | z          | U(eq)      |
|------|------------|------------|------------|------------|
| Ir1  | 0.26250(2) | 0.31756(2) | 0.29199(2) | 0.01566(8) |
| N1   | 0.1275(5)  | 0.4409(4)  | 0.3219(4)  | 0.0171(11) |
| N2   | 0.3475(5)  | 0.3593(4)  | 0.4025(4)  | 0.0172(11) |
| N3   | 0.2339(5)  | 0.1857(4)  | 0.4001(4)  | 0.0174(11) |
| N4   | 0.2969(5)  | 0.4376(5)  | 0.1760(4)  | 0.0183(11) |
| C1   | 0.0207(6)  | 0.4856(6)  | 0.2725(5)  | 0.0206(13) |
| C2   | -0.0598(7) | 0.5714(6)  | 0.2898(6)  | 0.0263(15) |
| C3   | -0.0299(7) | 0.6121(6)  | 0.3621(6)  | 0.0275(15) |
| C4   | 0.0793(7)  | 0.5670(6)  | 0.4142(5)  | 0.0261(15) |
| C5   | 0.1571(6)  | 0.4812(5)  | 0.3936(5)  | 0.0178(12) |
| C6   | 0.2774(6)  | 0.4297(6)  | 0.4420(5)  | 0.0188(13) |
| C7   | 0.3174(7)  | 0.4518(6)  | 0.5234(5)  | 0.0247(15) |
| C8   | 0.4344(7)  | 0.4019(6)  | 0.5617(5)  | 0.0254(15) |
| C9   | 0.5076(6)  | 0.3331(6)  | 0.5193(5)  | 0.0233(14) |
| C10  | 0.4611(6)  | 0.3130(5)  | 0.4399(5)  | 0.0199(13) |
| C11  | 0.1421(6)  | 0.1901(6)  | 0.4582(5)  | 0.0189(13) |
| C12  | 0.1313(6)  | 0.0996(6)  | 0.5328(5)  | 0.0205(13) |
| C13  | 0.2147(7)  | 0.0011(6)  | 0.5493(5)  | 0.0267(15) |

|     |            |            |           |            |
|-----|------------|------------|-----------|------------|
| C14 | 0.3058(7)  | -0.0038(6) | 0.4877(6) | 0.0280(16) |
| C15 | 0.3161(6)  | 0.0888(5)  | 0.4126(5) | 0.0197(13) |
| C16 | 0.4063(6)  | 0.0956(6)  | 0.3416(5) | 0.0198(13) |
| C17 | 0.4972(7)  | 0.0088(6)  | 0.3344(6) | 0.0262(15) |
| C18 | 0.5776(7)  | 0.0189(6)  | 0.2636(6) | 0.0296(16) |
| C19 | 0.5643(7)  | 0.1217(6)  | 0.1971(5) | 0.0269(15) |
| C20 | 0.4772(6)  | 0.2117(6)  | 0.2005(5) | 0.0229(14) |
| C21 | 0.3961(6)  | 0.2003(5)  | 0.2728(5) | 0.0179(13) |
| C22 | 0.0304(7)  | 0.1043(6)  | 0.5984(5) | 0.0247(15) |
| C23 | 0.3708(6)  | 0.5035(5)  | 0.1808(5) | 0.0185(13) |
| C24 | 0.3892(6)  | 0.5856(6)  | 0.1008(5) | 0.0240(14) |
| C25 | 0.3301(7)  | 0.6002(6)  | 0.0119(5) | 0.0276(16) |
| C26 | 0.2560(7)  | 0.5347(6)  | 0.0060(5) | 0.0281(16) |
| C27 | 0.2395(6)  | 0.4507(6)  | 0.0884(5) | 0.0218(14) |
| C28 | 0.1688(6)  | 0.3705(6)  | 0.0935(5) | 0.0236(14) |
| C29 | 0.1037(7)  | 0.3632(7)  | 0.0160(6) | 0.0317(17) |
| C30 | 0.0374(8)  | 0.2854(7)  | 0.0262(6) | 0.0363(19) |
| C31 | 0.0379(7)  | 0.2135(7)  | 0.1169(6) | 0.0321(17) |
| C32 | 0.1024(6)  | 0.2142(7)  | 0.1975(5) | 0.0259(15) |
| C33 | 0.1675(6)  | 0.2936(6)  | 0.1866(5) | 0.0198(13) |
| C34 | 0.4720(7)  | 0.6556(6)  | 0.1088(5) | 0.0283(16) |
| F1  | -0.0292(5) | 0.0269(4)  | 0.6026(4) | 0.0431(13) |
| F2  | 0.0701(5)  | 0.0883(5)  | 0.6898(3) | 0.0496(14) |
| F3  | -0.0489(4) | 0.1993(4)  | 0.5720(4) | 0.0368(11) |
| F4  | 0.5108(4)  | -0.0922(4) | 0.3994(4) | 0.0371(11) |

|     |             |             |             |            |
|-----|-------------|-------------|-------------|------------|
| F5  | 0.6415(4)   | 0.1359(4)   | 0.1265(3)   | 0.0364(11) |
| F6  | 0.5293(5)   | 0.6254(4)   | 0.1952(4)   | 0.0460(14) |
| F7  | 0.4118(5)   | 0.7609(4)   | 0.0914(4)   | 0.0426(12) |
| F8  | 0.5538(5)   | 0.6580(5)   | 0.0429(4)   | 0.0461(13) |
| F9  | 0.1034(5)   | 0.4333(4)   | -0.0737(3)  | 0.0469(14) |
| F10 | -0.0253(5)  | 0.1358(5)   | 0.1278(4)   | 0.0518(15) |
| P1  | 0.77550(19) | 0.31570(17) | 0.32440(16) | 0.0305(4)  |
| F11 | 0.8192(5)   | 0.3849(5)   | 0.2261(3)   | 0.0437(13) |
| F12 | 0.7328(5)   | 0.2459(4)   | 0.4247(4)   | 0.0456(14) |
| F13 | 0.6987(6)   | 0.2663(6)   | 0.2669(5)   | 0.069(2)   |
| F14 | 0.6653(5)   | 0.4150(4)   | 0.3203(4)   | 0.0479(13) |
| F15 | 0.8536(5)   | 0.3643(4)   | 0.3859(3)   | 0.0381(11) |
| F16 | 0.8895(5)   | 0.2168(4)   | 0.3348(5)   | 0.0487(14) |
| O1  | 0.7801(13)  | 0.8238(9)   | 0.1611(8)   | 0.069(5)   |
| C35 | 0.7656(8)   | 0.8889(7)   | 0.0805(8)   | 0.033(4)   |
| C36 | 0.6670(15)  | 0.8953(16)  | 0.0086(12)  | 0.071(7)   |
| C37 | 0.8450(13)  | 0.9682(11)  | 0.0463(10)  | 0.039(4)   |
| O2  | 0.2962(6)   | 0.6794(5)   | 0.3083(4)   | 0.0505(17) |
| C38 | 0.2373(4)   | 0.7644(4)   | 0.2545(3)   | 0.043(2)   |
| C39 | 0.2561(9)   | 0.8740(5)   | 0.2555(7)   | 0.056(3)   |
| C40 | 0.1410(7)   | 0.7666(7)   | 0.1826(6)   | 0.055(3)   |

**Table 3 . Positional Parameters for Hydrogens in Compound S15**

| Atom | <i>x</i>  | <i>y</i>  | <i>z</i>  | U(eq) |
|------|-----------|-----------|-----------|-------|
| H1   | -0.00046  | 0.456881  | 0.223479  | 0.027 |
| H2   | -0.134372 | 0.602102  | 0.252718  | 0.035 |
| H3   | -0.084309 | 0.670751  | 0.375803  | 0.037 |
| H4   | 0.100973  | 0.594508  | 0.463765  | 0.035 |
| H7   | 0.266238  | 0.499603  | 0.55189   | 0.033 |
| H8   | 0.463816  | 0.415333  | 0.617337  | 0.034 |
| H9   | 0.58824   | 0.300296  | 0.543839  | 0.031 |
| H10  | 0.510828  | 0.264816  | 0.410873  | 0.026 |
| H11  | 0.083844  | 0.256949  | 0.447473  | 0.025 |
| H13  | 0.209031  | -0.061318 | 0.601553  | 0.036 |
| H14  | 0.362533  | -0.071133 | 0.496444  | 0.037 |
| H18  | 0.638926  | -0.041478 | 0.260573  | 0.039 |
| H20  | 0.472641  | 0.281081  | 0.153687  | 0.03  |
| H23  | 0.41132   | 0.492819  | 0.241415  | 0.025 |
| H25  | 0.341628  | 0.65592   | -0.044317 | 0.037 |
| H26  | 0.214822  | 0.545663  | -0.054348 | 0.037 |
| H30  | -0.007001 | 0.28184   | -0.027782 | 0.048 |
| H32  | 0.102     | 0.161544  | 0.258954  | 0.034 |
| H36a | 0.670089  | 0.952804  | -0.052137 | 0.106 |
| H36b | 0.6776    | 0.824803  | -0.004163 | 0.106 |
| H36c | 0.589307  | 0.912393  | 0.035518  | 0.106 |
| H37a | 0.818984  | 1.013759  | -0.020671 | 0.058 |



|      |          |          |          |       |
|------|----------|----------|----------|-------|
| H37b | 0.839731 | 1.014914 | 0.088438 | 0.058 |
| H37c | 0.928017 | 0.927322 | 0.048756 | 0.058 |
| H39a | 0.200064 | 0.932546 | 0.206857 | 0.084 |
| H39b | 0.242181 | 0.882361 | 0.32     | 0.084 |
| H39c | 0.338412 | 0.878434 | 0.240213 | 0.084 |
| H40a | 0.103733 | 0.842706 | 0.145891 | 0.083 |
| H40b | 0.176385 | 0.727324 | 0.137668 | 0.083 |
| H40c | 0.080158 | 0.731254 | 0.217457 | 0.083 |

**Table 4 . Refined Thermal Parameters (U's) for Compound S15**

| Atom | U <sub>11</sub> | U <sub>22</sub> | U <sub>33</sub> | U <sub>23</sub> | U <sub>13</sub> | U <sub>12</sub> |
|------|-----------------|-----------------|-----------------|-----------------|-----------------|-----------------|
| Ir1  | 0.01686(12)     | 0.01657(12)     | 0.01365(12)     | -0.00384(9)     | 0.00014(8)      | -0.00511(9)     |
| N1   | 0.020(3)        | 0.016(3)        | 0.015(3)        | -0.003(2)       | 0.000(2)        | -0.005(2)       |
| N2   | 0.019(3)        | 0.017(3)        | 0.017(3)        | -0.005(2)       | -0.002(2)       | -0.007(2)       |
| N3   | 0.021(3)        | 0.016(3)        | 0.015(3)        | -0.002(2)       | -0.001(2)       | -0.006(2)       |
| N4   | 0.018(3)        | 0.020(3)        | 0.015(3)        | -0.004(2)       | 0.001(2)        | -0.002(2)       |
| C1   | 0.019(3)        | 0.024(3)        | 0.018(3)        | -0.003(3)       | 0.001(2)        | -0.007(3)       |
| C2   | 0.021(3)        | 0.027(4)        | 0.030(4)        | -0.009(3)       | -0.002(3)       | -0.004(3)       |
| C3   | 0.024(4)        | 0.024(4)        | 0.035(4)        | -0.013(3)       | 0.003(3)        | -0.002(3)       |
| C4   | 0.031(4)        | 0.023(3)        | 0.024(4)        | -0.009(3)       | -0.005(3)       | -0.004(3)       |
| C5   | 0.019(3)        | 0.018(3)        | 0.018(3)        | -0.006(2)       | 0.001(2)        | -0.006(2)       |
| C6   | 0.020(3)        | 0.023(3)        | 0.016(3)        | -0.007(3)       | 0.003(2)        | -0.009(3)       |
| C7   | 0.027(4)        | 0.028(4)        | 0.024(3)        | -0.016(3)       | -0.001(3)       | -0.006(3)       |
| C8   | 0.026(4)        | 0.033(4)        | 0.019(3)        | -0.009(3)       | -0.005(3)       | -0.010(3)       |

|     |          |          |          |           |           |           |
|-----|----------|----------|----------|-----------|-----------|-----------|
| C9  | 0.022(3) | 0.025(3) | 0.024(3) | -0.006(3) | -0.004(3) | -0.009(3) |
| C10 | 0.018(3) | 0.018(3) | 0.022(3) | -0.003(3) | -0.001(3) | -0.004(2) |
| C11 | 0.019(3) | 0.020(3) | 0.019(3) | -0.006(3) | 0.003(2)  | -0.008(3) |
| C12 | 0.021(3) | 0.022(3) | 0.019(3) | -0.005(3) | 0.000(3)  | -0.008(3) |
| C13 | 0.030(4) | 0.021(3) | 0.025(4) | 0.002(3)  | 0.003(3)  | -0.009(3) |
| C14 | 0.027(4) | 0.018(3) | 0.034(4) | -0.001(3) | 0.006(3)  | -0.005(3) |
| C15 | 0.019(3) | 0.019(3) | 0.019(3) | -0.002(3) | -0.002(3) | -0.005(3) |
| C16 | 0.018(3) | 0.022(3) | 0.020(3) | -0.008(3) | 0.000(3)  | -0.004(3) |
| C17 | 0.026(4) | 0.019(3) | 0.030(4) | -0.002(3) | 0.002(3)  | -0.006(3) |
| C18 | 0.028(4) | 0.024(4) | 0.032(4) | -0.008(3) | 0.003(3)  | 0.002(3)  |
| C19 | 0.025(4) | 0.034(4) | 0.025(4) | -0.013(3) | 0.009(3)  | -0.009(3) |
| C20 | 0.021(3) | 0.026(4) | 0.021(3) | -0.005(3) | 0.001(3)  | -0.007(3) |
| C21 | 0.017(3) | 0.020(3) | 0.020(3) | -0.007(3) | 0.000(2)  | -0.008(2) |
| C22 | 0.030(4) | 0.024(3) | 0.022(3) | -0.007(3) | 0.009(3)  | -0.012(3) |
| C23 | 0.019(3) | 0.016(3) | 0.020(3) | -0.004(2) | 0.004(2)  | -0.003(2) |
| C24 | 0.023(3) | 0.023(3) | 0.024(3) | -0.004(3) | 0.009(3)  | -0.007(3) |
| C25 | 0.033(4) | 0.025(4) | 0.019(3) | 0.000(3)  | 0.005(3)  | -0.005(3) |
| C26 | 0.040(4) | 0.028(4) | 0.013(3) | -0.004(3) | 0.000(3)  | -0.003(3) |
| C27 | 0.025(3) | 0.023(3) | 0.015(3) | -0.004(3) | 0.001(3)  | -0.004(3) |
| C28 | 0.022(3) | 0.027(4) | 0.019(3) | -0.007(3) | -0.002(3) | -0.002(3) |
| C29 | 0.032(4) | 0.037(4) | 0.023(4) | -0.008(3) | -0.007(3) | -0.005(3) |
| C30 | 0.036(4) | 0.044(5) | 0.033(4) | -0.017(4) | -0.011(3) | -0.009(4) |
| C31 | 0.027(4) | 0.045(5) | 0.036(4) | -0.023(4) | 0.002(3)  | -0.018(3) |
| C32 | 0.021(3) | 0.036(4) | 0.024(4) | -0.015(3) | 0.002(3)  | -0.009(3) |
| C33 | 0.016(3) | 0.030(4) | 0.016(3) | -0.011(3) | 0.002(2)  | -0.005(3) |

|     |            |           |            |            |           |             |
|-----|------------|-----------|------------|------------|-----------|-------------|
| C34 | 0.037(4)   | 0.023(4)  | 0.024(4)   | -0.001(3)  | 0.010(3)  | -0.013(3)   |
| F1  | 0.041(3)   | 0.038(3)  | 0.063(3)   | -0.022(3)  | 0.027(3)  | -0.025(2)   |
| F2  | 0.042(3)   | 0.083(4)  | 0.020(2)   | -0.013(3)  | 0.007(2)  | -0.009(3)   |
| F3  | 0.038(3)   | 0.026(2)  | 0.040(3)   | -0.002(2)  | 0.014(2)  | -0.003(2)   |
| F4  | 0.036(3)   | 0.021(2)  | 0.044(3)   | 0.001(2)   | 0.010(2)  | -0.0005(19) |
| F5  | 0.032(2)   | 0.039(3)  | 0.034(3)   | -0.009(2)  | 0.017(2)  | -0.003(2)   |
| F6  | 0.059(3)   | 0.046(3)  | 0.033(3)   | 0.003(2)   | -0.007(2) | -0.033(3)   |
| F7  | 0.048(3)   | 0.024(2)  | 0.054(3)   | -0.007(2)  | 0.008(3)  | -0.012(2)   |
| F8  | 0.044(3)   | 0.056(3)  | 0.049(3)   | -0.022(3)  | 0.025(3)  | -0.026(3)   |
| F9  | 0.068(4)   | 0.049(3)  | 0.020(2)   | -0.002(2)  | -0.017(2) | -0.018(3)   |
| F10 | 0.054(3)   | 0.073(4)  | 0.049(3)   | -0.029(3)  | 0.000(3)  | -0.044(3)   |
| P1  | 0.0302(10) | 0.030(1)  | 0.0373(11) | -0.0130(9) | 0.0097(9) | -0.0157(8)  |
| F11 | 0.047(3)   | 0.067(4)  | 0.024(2)   | -0.010(2)  | 0.001(2)  | -0.033(3)   |
| F12 | 0.042(3)   | 0.029(3)  | 0.059(3)   | -0.003(2)  | 0.028(3)  | -0.008(2)   |
| F13 | 0.058(4)   | 0.096(5)  | 0.089(5)   | -0.059(4)  | 0.012(4)  | -0.049(4)   |
| F14 | 0.046(3)   | 0.037(3)  | 0.049(3)   | -0.003(2)  | 0.001(3)  | 0.000(2)    |
| F15 | 0.052(3)   | 0.040(3)  | 0.025(2)   | -0.008(2)  | 0.000(2)  | -0.020(2)   |
| F16 | 0.039(3)   | 0.043(3)  | 0.070(4)   | -0.024(3)  | 0.023(3)  | -0.014(2)   |
| O1  | 0.097(13)  | 0.028(7)  | 0.072(11)  | -0.007(7)  | 0.034(10) | -0.005(8)   |
| C35 | 0.027(8)   | 0.025(8)  | 0.047(10)  | -0.022(7)  | 0.010(7)  | 0.008(6)    |
| C36 | 0.048(13)  | 0.055(14) | 0.12(2)    | -0.027(14) | 0.011(14) | -0.029(11)  |
| C37 | 0.043(10)  | 0.036(9)  | 0.043(10)  | -0.018(8)  | 0.017(8)  | -0.014(8)   |
| O2  | 0.054(4)   | 0.058(4)  | 0.041(4)   | -0.010(3)  | -0.002(3) | -0.020(4)   |
| C38 | 0.035(5)   | 0.057(6)  | 0.040(5)   | -0.018(5)  | 0.002(4)  | -0.010(4)   |
| C39 | 0.064(7)   | 0.055(6)  | 0.058(7)   | -0.028(5)  | 0.005(5)  | -0.018(5)   |

|     |          |          |          |           |           |           |
|-----|----------|----------|----------|-----------|-----------|-----------|
| C40 | 0.043(6) | 0.072(8) | 0.050(6) | -0.020(5) | -0.002(5) | -0.010(5) |
|-----|----------|----------|----------|-----------|-----------|-----------|

**Table 5 . Bond Distances in Compound S15, Å**

|         |           |         |           |         |           |
|---------|-----------|---------|-----------|---------|-----------|
| Ir1-N1  | 2.127(6)  | Ir1-N2  | 2.138(5)  | Ir1-N3  | 2.047(5)  |
| Ir1-N4  | 2.038(6)  | Ir1-C21 | 2.005(7)  | Ir1-C33 | 2.013(7)  |
| N1-C1   | 1.339(8)  | N1-C5   | 1.371(8)  | N2-C6   | 1.347(9)  |
| N2-C10  | 1.349(8)  | N3-C11  | 1.349(9)  | N3-C15  | 1.371(9)  |
| N4-C23  | 1.356(9)  | N4-C27  | 1.374(8)  | C1-C2   | 1.378(10) |
| C2-C3   | 1.383(10) | C3-C4   | 1.378(10) | C4-C5   | 1.383(10) |
| C5-C6   | 1.471(9)  | C6-C7   | 1.394(9)  | C7-C8   | 1.392(10) |
| C8-C9   | 1.377(11) | C9-C10  | 1.384(9)  | C11-C12 | 1.376(9)  |
| C12-C13 | 1.386(10) | C12-C22 | 1.499(10) | C13-C14 | 1.376(10) |
| C14-C15 | 1.396(9)  | C15-C16 | 1.456(9)  | C16-C17 | 1.395(10) |
| C16-C21 | 1.418(9)  | C17-C18 | 1.374(11) | C17-F4  | 1.355(8)  |
| C18-C19 | 1.381(11) | C19-C20 | 1.384(10) | C19-F5  | 1.349(8)  |
| C20-C21 | 1.396(9)  | C22-F1  | 1.333(8)  | C22-F2  | 1.338(9)  |
| C22-F3  | 1.323(9)  | C23-C24 | 1.379(9)  | C24-C25 | 1.394(10) |
| C24-C34 | 1.489(10) | C25-C26 | 1.356(11) | C26-C27 | 1.407(10) |
| C27-C28 | 1.451(10) | C28-C29 | 1.386(10) | C28-C33 | 1.424(10) |
| C29-C30 | 1.380(12) | C29-F9  | 1.348(9)  | C30-C31 | 1.367(12) |
| C31-C32 | 1.386(10) | C31-F10 | 1.352(9)  | C32-C33 | 1.385(10) |
| C34-F6  | 1.319(9)  | C34-F7  | 1.353(9)  | C34-F8  | 1.335(9)  |
| P1-F11  | 1.589(5)  | P1-F12  | 1.609(5)  | P1-F13  | 1.571(6)  |

|        |          |         |          |         |          |
|--------|----------|---------|----------|---------|----------|
| P1-F14 | 1.592(6) | P1-F15  | 1.612(5) | P1-F16  | 1.600(6) |
| O1-C35 | 1.2079   | C35-C36 | 1.5088   | C35-C37 | 1.5087   |
| O2-C38 | 1.2078   | C38-C39 | 1.5088   | C38-C40 | 1.5088   |

**Table 6 . Bond Angles in Compound S15, °**

|             |          |             |          |             |          |
|-------------|----------|-------------|----------|-------------|----------|
| N1-Ir1-N2   | 76.4(2)  | N3-Ir1-N1   | 98.2(2)  | N3-Ir1-N2   | 86.8(2)  |
| N4-Ir1-N1   | 87.1(2)  | N4-Ir1-N2   | 97.4(2)  | N4-Ir1-N3   | 173.9(2) |
| C21-Ir1-N1  | 175.9(2) | C21-Ir1-N2  | 99.6(2)  | C21-Ir1-N3  | 80.4(2)  |
| C21-Ir1-N4  | 94.6(2)  | C21-Ir1-C33 | 86.8(3)  | C33-Ir1-N1  | 97.2(2)  |
| C33-Ir1-N2  | 173.4(3) | C33-Ir1-N3  | 95.5(3)  | C33-Ir1-N4  | 80.7(3)  |
| C1-N1-Ir1   | 125.1(5) | C1-N1-C5    | 118.5(6) | C5-N1-Ir1   | 116.3(4) |
| C6-N2-Ir1   | 116.1(4) | C6-N2-C10   | 119.2(6) | C10-N2-Ir1  | 124.4(5) |
| C11-N3-Ir1  | 124.1(5) | C11-N3-C15  | 120.0(6) | C15-N3-Ir1  | 115.9(4) |
| C23-N4-Ir1  | 124.2(4) | C23-N4-C27  | 119.5(6) | C27-N4-Ir1  | 116.3(5) |
| N1-C1-C2    | 122.7(7) | C1-C2-C3    | 118.7(7) | C4-C3-C2    | 119.5(7) |
| C3-C4-C5    | 119.4(7) | N1-C5-C4    | 121.1(6) | N1-C5-C6    | 114.9(6) |
| C4-C5-C6    | 124.0(6) | N2-C6-C5    | 115.7(6) | N2-C6-C7    | 121.6(6) |
| C7-C6-C5    | 122.7(6) | C8-C7-C6    | 118.3(7) | C9-C8-C7    | 120.1(6) |
| C8-C9-C10   | 118.5(7) | N2-C10-C9   | 122.2(7) | N3-C11-C12  | 121.2(6) |
| C11-C12-C13 | 120.3(7) | C11-C12-C22 | 121.5(6) | C13-C12-C22 | 118.2(6) |
| C14-C13-C12 | 118.2(7) | C13-C14-C15 | 120.9(7) | N3-C15-C14  | 119.4(6) |
| N3-C15-C16  | 113.6(6) | C14-C15-C16 | 127.0(6) | C17-C16-C15 | 125.9(6) |
| C17-C16-C21 | 118.7(6) | C21-C16-C15 | 115.5(6) | C18-C17-C16 | 123.5(7) |

|             |          |             |          |             |          |
|-------------|----------|-------------|----------|-------------|----------|
| F4-C17-C16  | 120.5(7) | F4-C17-C18  | 115.9(7) | C17-C18-C19 | 116.3(7) |
| C18-C19-C20 | 123.3(7) | F5-C19-C18  | 118.5(7) | F5-C19-C20  | 118.2(7) |
| C19-C20-C21 | 119.8(7) | C16-C21-lr1 | 114.5(5) | C20-C21-lr1 | 127.1(5) |
| C20-C21-C16 | 118.4(6) | F1-C22-C12  | 112.1(6) | F1-C22-F2   | 106.1(6) |
| F2-C22-C12  | 111.4(6) | F3-C22-C12  | 113.3(6) | F3-C22-F1   | 107.1(6) |
| F3-C22-F2   | 106.4(6) | N4-C23-C24  | 122.3(6) | C23-C24-C25 | 118.5(7) |
| C23-C24-C34 | 120.7(7) | C25-C24-C34 | 120.8(6) | C26-C25-C24 | 119.8(7) |
| C25-C26-C27 | 120.7(7) | N4-C27-C26  | 119.1(7) | N4-C27-C28  | 113.2(6) |
| C26-C27-C28 | 127.7(7) | C29-C28-C27 | 125.5(7) | C29-C28-C33 | 118.2(7) |
| C33-C28-C27 | 116.3(6) | C30-C29-C28 | 122.5(8) | F9-C29-C28  | 120.4(7) |
| F9-C29-C30  | 117.1(7) | C31-C30-C29 | 117.4(7) | C30-C31-C32 | 123.5(7) |
| F10-C31-C30 | 118.2(7) | F10-C31-C32 | 118.3(8) | C33-C32-C31 | 118.5(7) |
| C28-C33-lr1 | 113.4(5) | C32-C33-lr1 | 126.7(5) | C32-C33-C28 | 119.9(6) |
| F6-C34-C24  | 113.6(6) | F6-C34-F7   | 106.7(7) | F6-C34-F8   | 107.8(7) |
| F7-C34-C24  | 110.9(7) | F8-C34-C24  | 112.0(6) | F8-C34-F7   | 105.4(6) |
| F11-P1-F12  | 179.2(3) | F11-P1-F14  | 90.9(3)  | F11-P1-F15  | 90.2(3)  |
| F11-P1-F16  | 90.7(3)  | F12-P1-F15  | 89.0(3)  | F13-P1-F11  | 91.2(3)  |
| F13-P1-F12  | 89.6(4)  | F13-P1-F14  | 91.5(4)  | F13-P1-F15  | 178.5(4) |
| F13-P1-F16  | 91.7(4)  | F14-P1-F12  | 89.3(3)  | F14-P1-F15  | 88.7(3)  |
| F14-P1-F16  | 176.3(3) | F16-P1-F12  | 89.0(3)  | F16-P1-F15  | 88.0(3)  |
| O1-C35-C36  | 121.8    | O1-C35-C37  | 121.8    | C37-C35-C36 | 116.3    |
| O2-C38-C39  | 121.8    | O2-C38-C40  | 121.8    | C40-C38-C39 | 116.3    |

## References

1. For information on this reactor and its construction see the Photochemical Reactor Design of the Supporting Information of: Remeur, C.; Kelly, C. B.; Patel, N. R.; Molander, G. A. *ACS Catal.* **2017**, *7*, 6065.
2. Kelly, C. B.; Patel, N. R.; Primer, D. N.; Jouffroy, M.; Tellis, J. C.; Molander, G. *Nat. Prot.* **2017**, *12*, 472
3. Patel, N. P.; Kelly, C. B.; Siegenfeld, A. P.; Molander, G. A. *ACS Catal.* **2017**, *7*, 1766.
4. For preparation of the bromide leading to **18** see: Phelan, J. P.; Wiles, R. W.; Lang, S. B.; Kelly, C. B.; Molander, G. A. *Chem. Sci.* **2018**, *9*, 3215; For **25**, see: Phelan, J. P.; Lang, S. B.; Compton, J. S.; Kelly, C. B.; Dykstra, R.; Gutierrez, O.; Molander, G. A. *J. Am. Chem. Soc.* **2018**, *140*, 8037.
5. Seebach, D.; Imwinkelried, R.; Stucky, G. *Helv. Chim. Acta* **1987**, *70*, 448.
6. Rosenau, C. P.; Jelier, B. J.; Gossert, A. D.; Togni, A. *Angew. Chem., Int. Ed.* **2018**, *57*, 9528.
7. Durandetti, M., Maddaluno, J. *Nickel Bromide Bipyridine* in Encyclopedia of Reagents for Organic Synthesis; **2014** doi:10.1002/047084289X.rm01736.
8. Patterson, S.; Alphey, M. S.; Jones, D. C.; Shanks, E. J.; Street, I. P.; Frearson, J. A.; Wyatt, P. G.; Gilbert, I. H.; Fairlamb, A. H. *J. Med. Chem.* **2011**, *54*, 6514.
9. Abdelkafi, H.; Michau, A.; Clerget, A.; Buisson, D.-A.; Johannes, L.; Gillet, D.; Barbier, J.; Cintrat, J.-C. *ChemMedChem*, **2015**, *10*, 1153.
10. Linstad, E. J.; Vāvere, A. L.; Hu B.; Kempinger J. J.; Snyder S. E.; DiMagno, S.G. *Org. Biomol. Chem.* **2017**, *15*, 2246.
11. Lee, Y.; Silverman, R. B. *Org. Lett.* **2000**, *2*, 3003.
12. Stone, I. B.; Jermaks, J.; MacMillan, S. N.; Lambert, T. H. *Angew. Chem. Int. Ed.* **2018**, *57*, 12494.
13. Choshi, T.; Yamada, S.; Sugino, E.; Kuwada, T.; Hibino, S. *J. Org. Chem.* **1995**, *60*, 5899.
14. Doering, N. A.; Kou, K. G. M.; Norseeda, K.; Lee, J. C.; Marth, C. J.; Gallego, G. M.; Sarpong, R. *J. Org. Chem.* **2018**, *83*, 12911.
15. Barbe, G.; Charette, A. B. *J. Am. Chem. Soc.* **2008**, *130*, 18.
16. Yuan, Y.-C.; Kamaraj, R.; Bruneau, C.; Labasque, T.; Roisnel, T.; Gramage-Doria, R. *Org. Lett.* **2017**, *19*, 6404.
17. Devine, W.; Woodring, J. L.; Swaminathan, U.; Amata, E.; Patel, G.; Erath, J.; Roncal, N. E.; Lee, P. J.; Leed, S. E.; Rodriguez, A.; Mensa-Wilmot, K.; Sciotti, R. J.; Pollastri, M. P. *J. Med. Chem.* **2015**, *58*, 5522.
18. Goodwin, N. C.; Cianchetta, G.; Burgoon, H. A.; Healy, J.; Mabon, R.; Strobel, E. D.; Allen, J.; Wang, S.; Hamman, B. D.; Rawlins, D. B. *ACS Med. Chem. Lett.* **2015**, *6*, 53.

19. Lawlor, F. J.; Norman, N. C.; Pickett, N. L.; Robins, E. G.; Nguyen, P.; Lesley, G.; Marder, T. B.; Ashmore, J. A.; Green, J. C. *Inorg. Chem.* **1998**, *37*, 5282.
20. Farre, A.; Soares, K.; Briggs, R. A.; Balanta, A.; Benoit, D. M.; Bonet, A. *Chem. – Eur. J.* **2016**, *22*, 17552.
21. Fawcett, J. P.; Wang, Y.; Mutsuga, T.; Myers, E. L.; Aggarwal, V. K. *Science* **2017**, *357*, 283.
22. Phelan, J. P.; Lang, S. B.; Compton, J. S.; Kelly, C. B.; Dykstra, R.; Gutierrez, O.; Molander, G. A. *J. Am. Chem. Soc.* **2018**, *140*, 8037.
23. Molander, G. A.; McKee, S. A. *Org. Lett.* **2011**, *13*, 4684.
24. Dai, J.-J.; Zhang, W.-M.; Shu, Y.-J.; Sun, Y.-Y.; Xu, J.; Feng, Y.-S.; Xu, H.-J. *Chem. Commun.* **2016**, *52*, 6793.
25. Mun, S.; Lee, J.-E.; Yun, J. *Org. Lett.* **2006**, *8*, 4887.
26. Pulis, A. P.; Blair, D. J.; Torres, E.; Aggarwal, V. K. *J. Am. Chem. Soc.* **2013**, *135*, 16054.
27. Qi, X.; Yu, F.; Chen, P.; Liu, G. *Angew. Chem., Int. Ed.* **2017**, *56*, 12692.
28. Patil, S. N.; Liu, F. *J. Org. Chem.* **2008**, *73*, 4476.
29. Bonet, A.; Odachowski, M.; Leonori, D.; Essafi, S.; Aggarwal, V. K. *Nat. Chem.* **2014**, *6*, 584.
30. Cho, S.; Hartwig, J. F. *J. Am. Chem. Soc.* **2013**, *135*, 8157.
31. Molander, G. A.; Cavalcanti, L. N. *J. Org. Chem.* **2011**, *76*, 623.



# Spectra of Synthesized Compounds

*N*-(3-bromophenyl)phthalimide)  
500 MHz, CDCl<sub>3</sub>

<sup>1</sup>H NMR

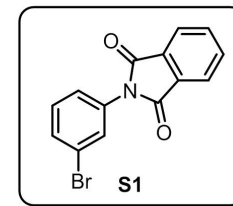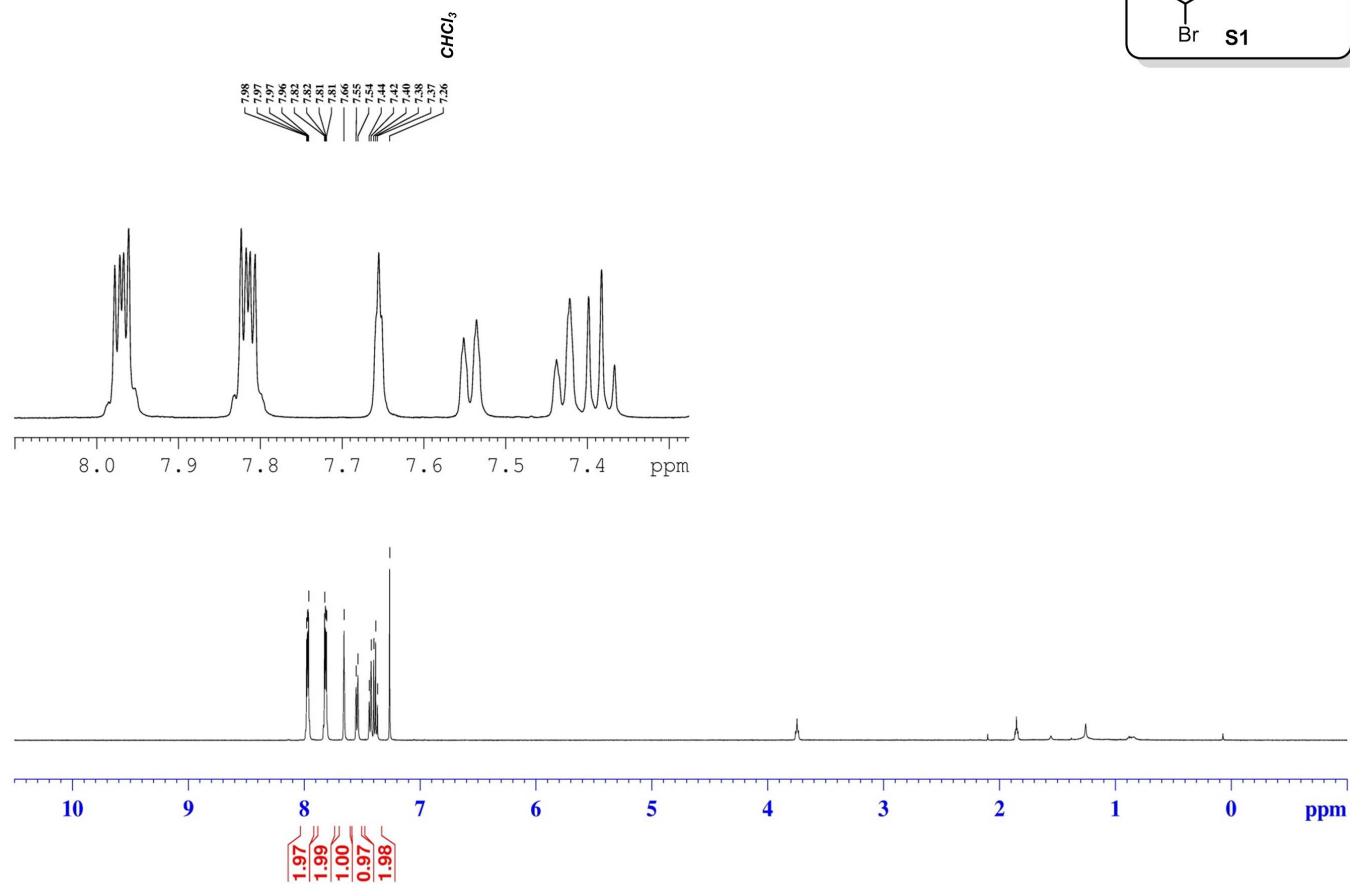

*N*-(3-Bromophenyl)phthalimide)  
125 MHz, CDCl<sub>3</sub>

<sup>13</sup>C NMR

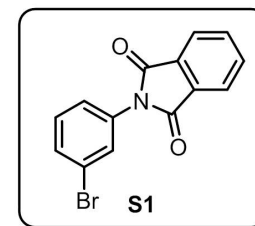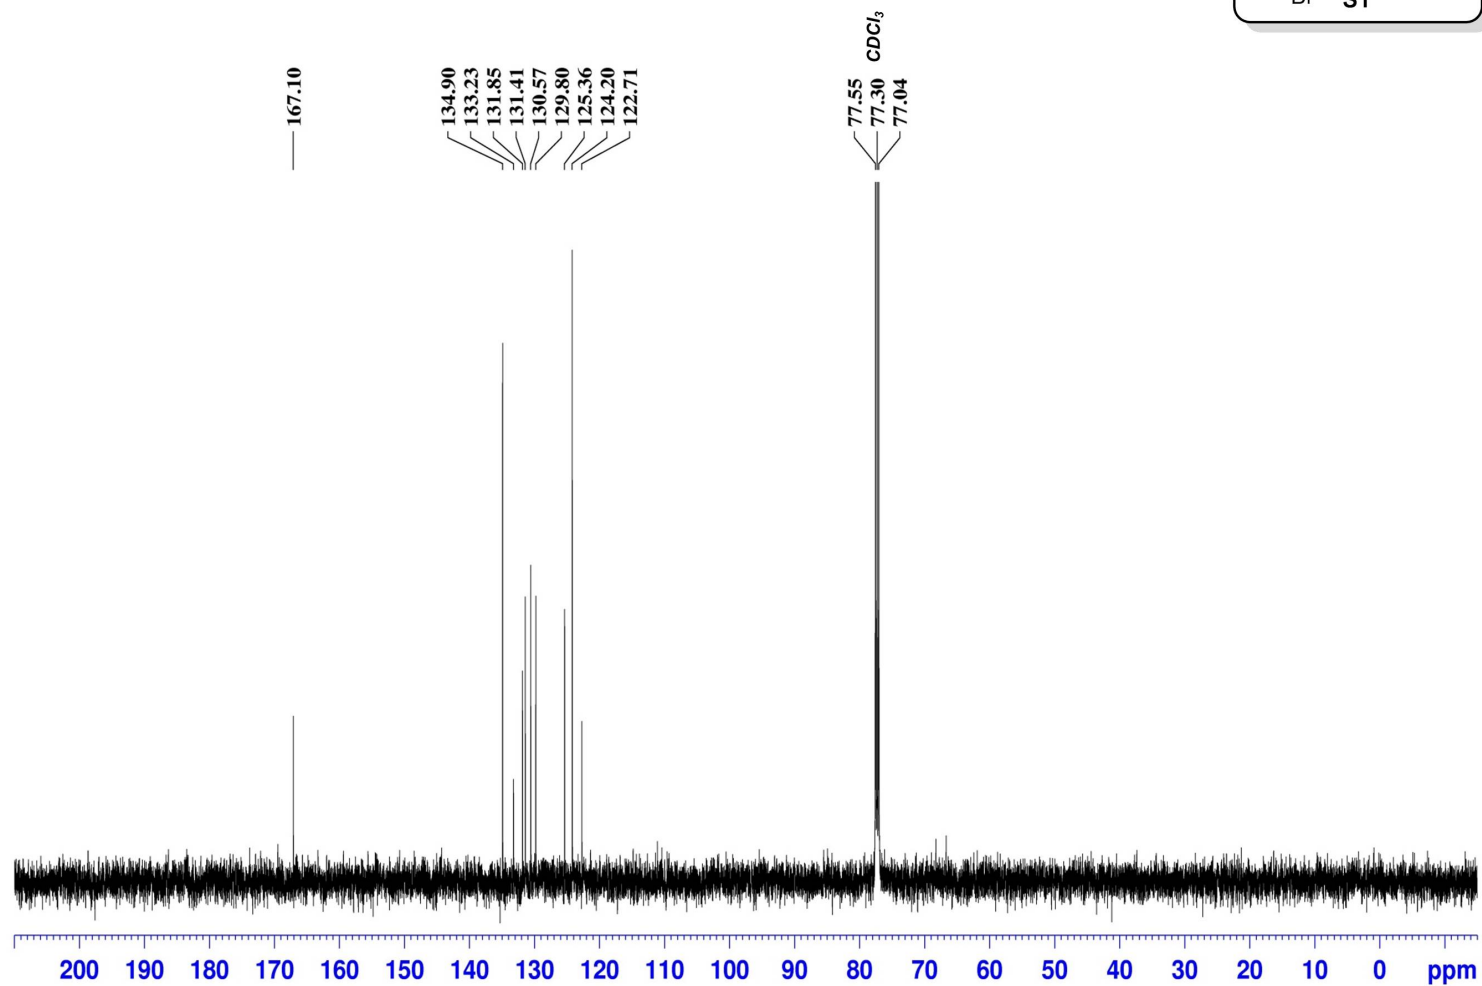

*tert*-butyl acetyl(4-bromophenyl)carbamate  
500 MHz, CDCl<sub>3</sub>

<sup>1</sup>H NMR

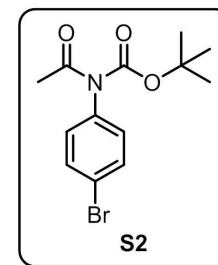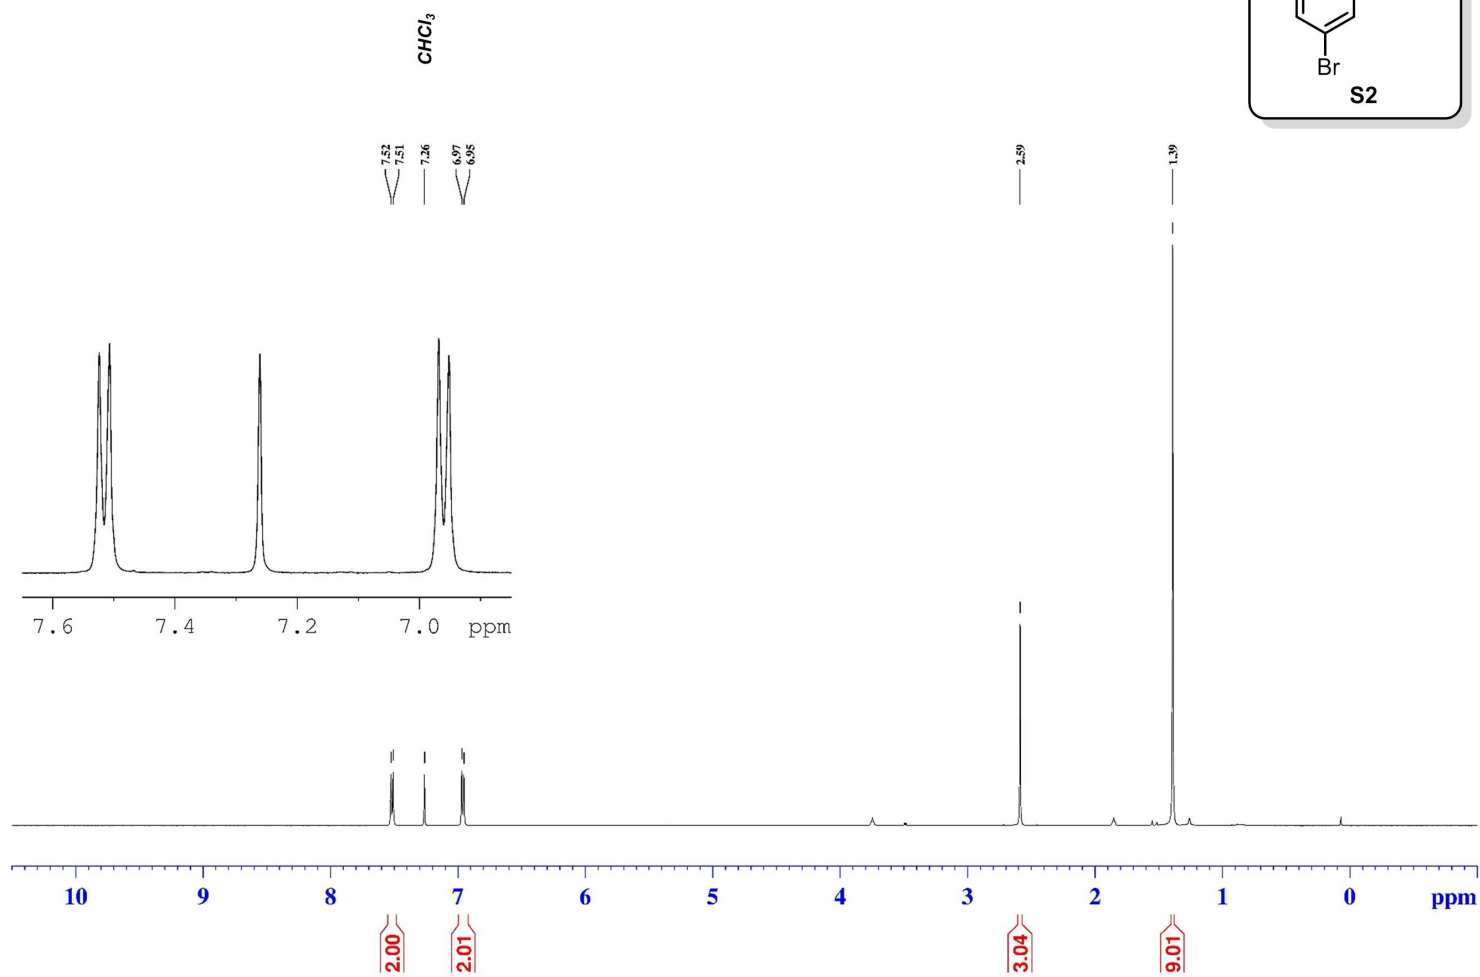

*Tert*-butyl acetyl(4-bromophenyl)carbamate  
125 MHz, CDCl<sub>3</sub>

<sup>13</sup>C NMR

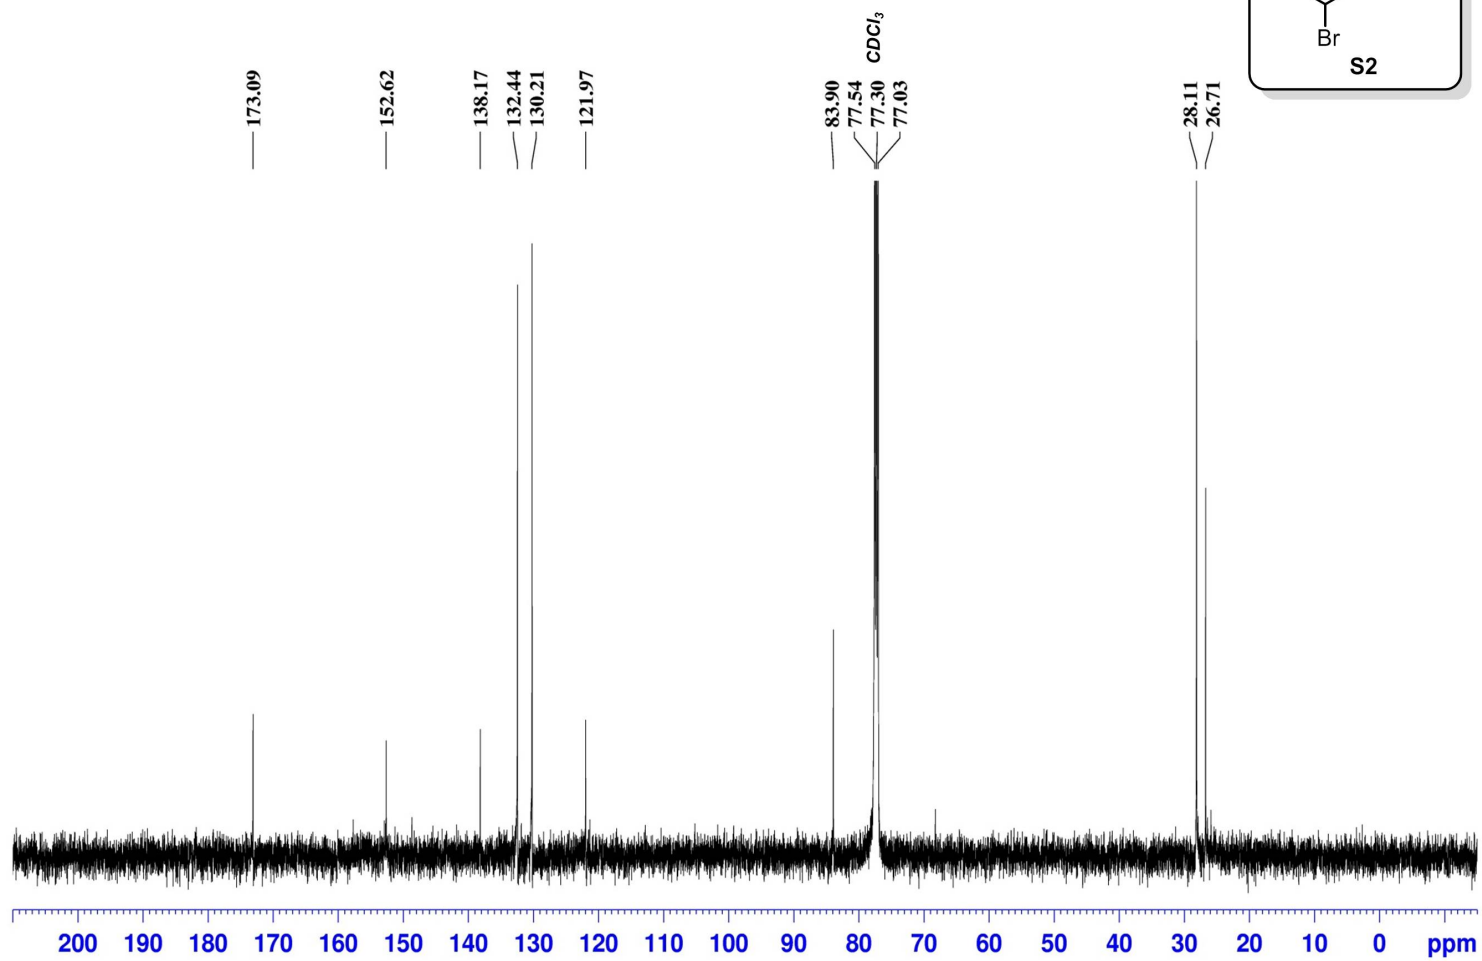

S100

4-bromo-2-(3-chlorophenoxy)benzonitrile  
500 MHz, CDCl<sub>3</sub>

<sup>1</sup>H NMR

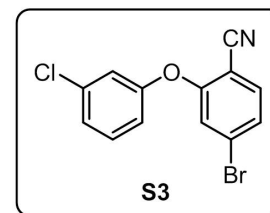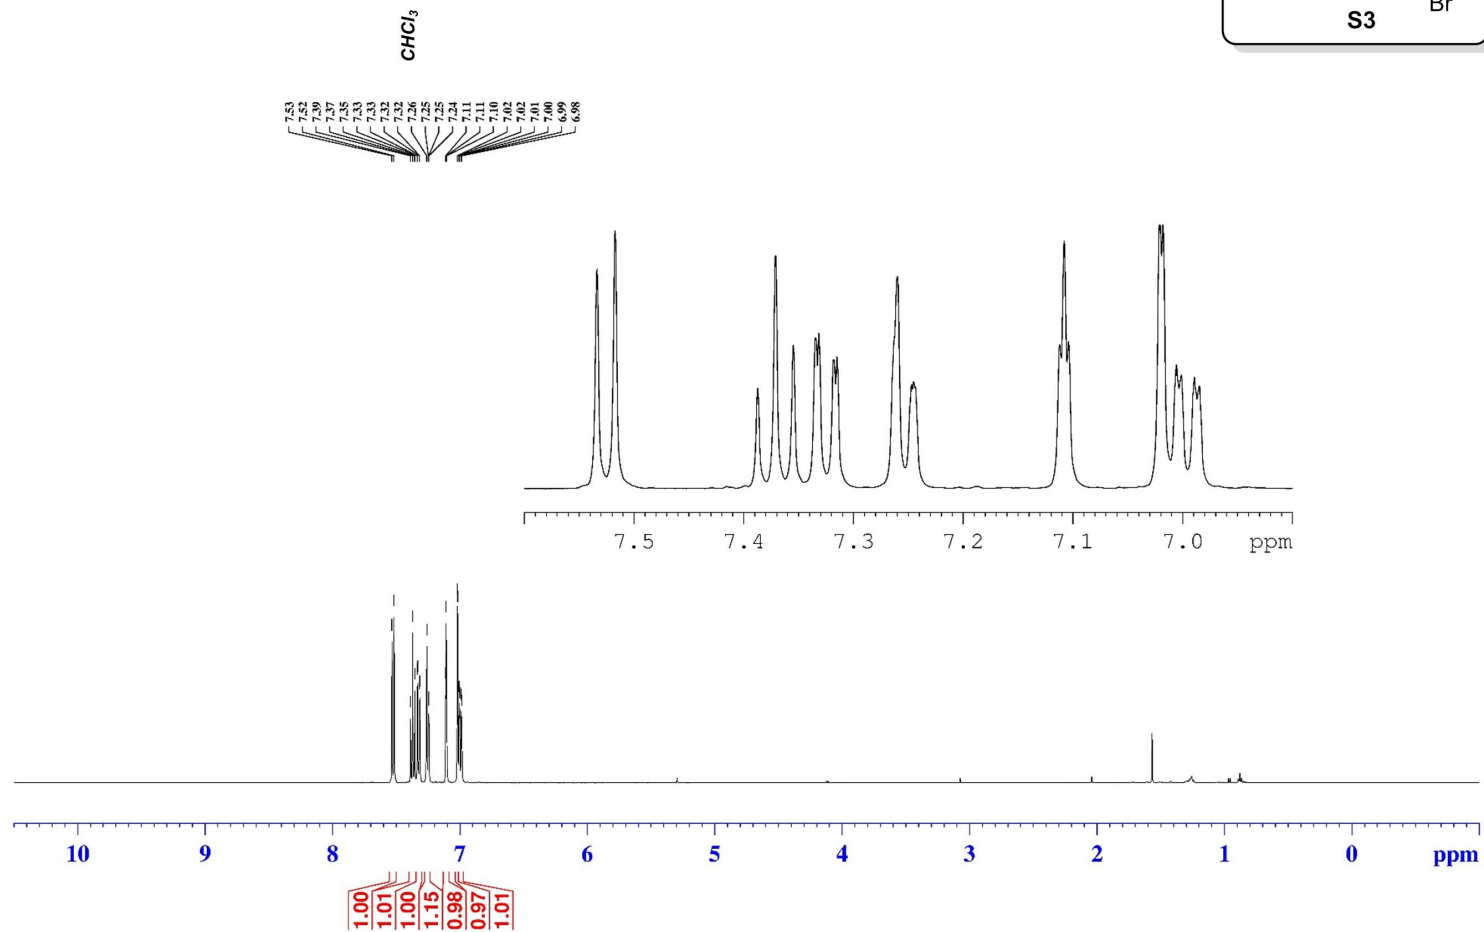

S101

4-bromo-2-(3-chlorophenoxy)benzonitrile  
125 MHz, CDCl<sub>3</sub>

<sup>13</sup>C NMR

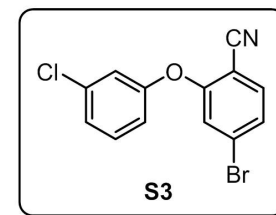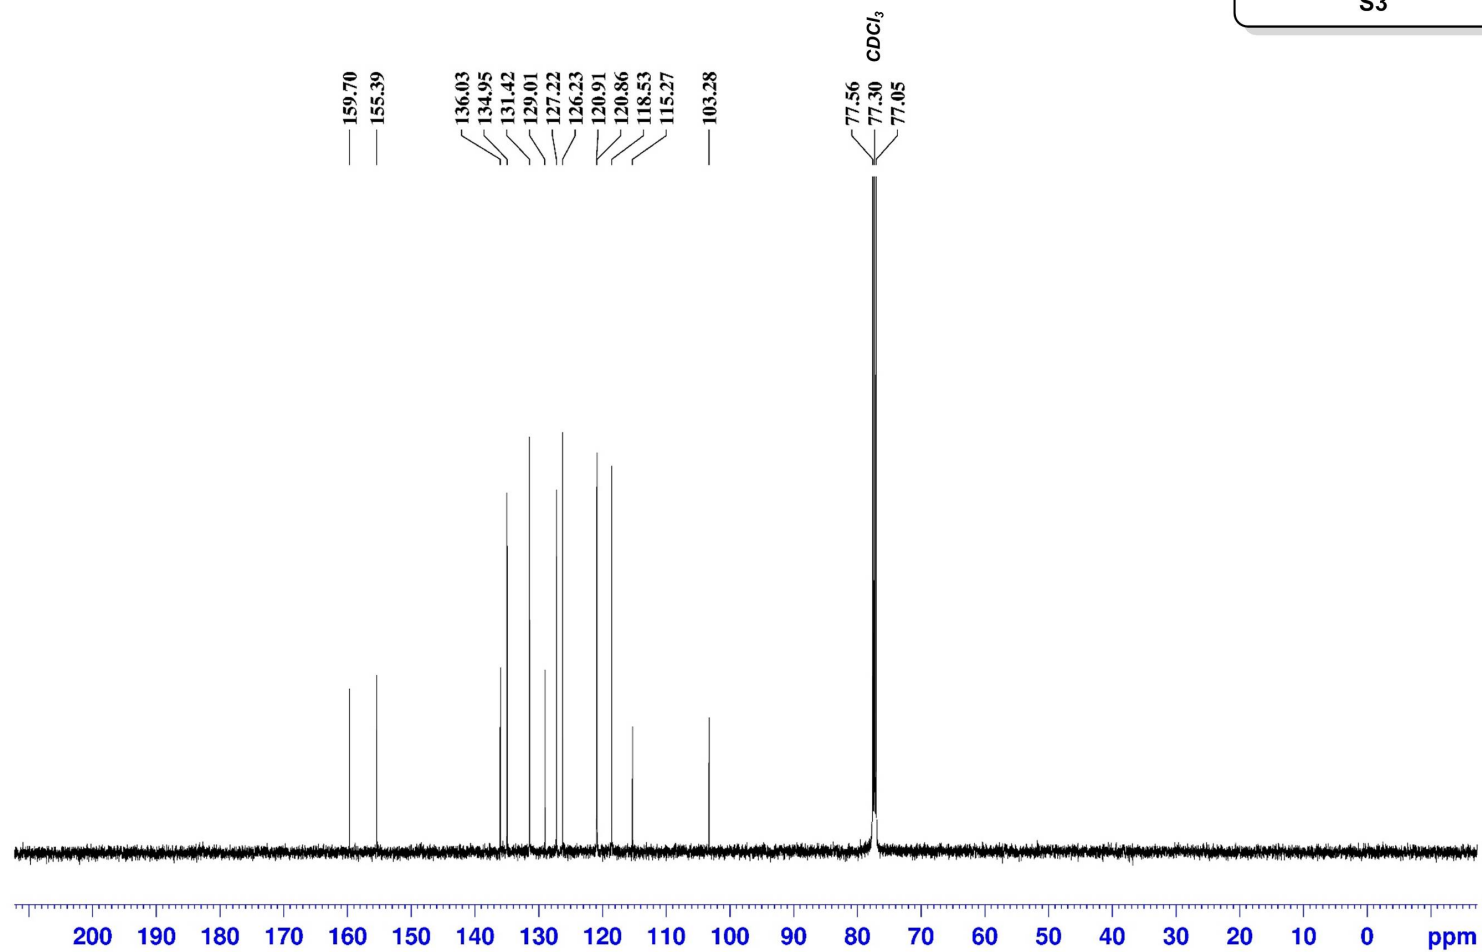

1,3-dioxoisindolin-2-yl 5-(2,5-dimethylphenoxy)-2,2-dimethylpentanoate  
500 MHz, CDCl<sub>3</sub>

<sup>1</sup>H NMR

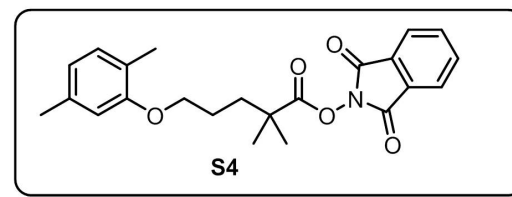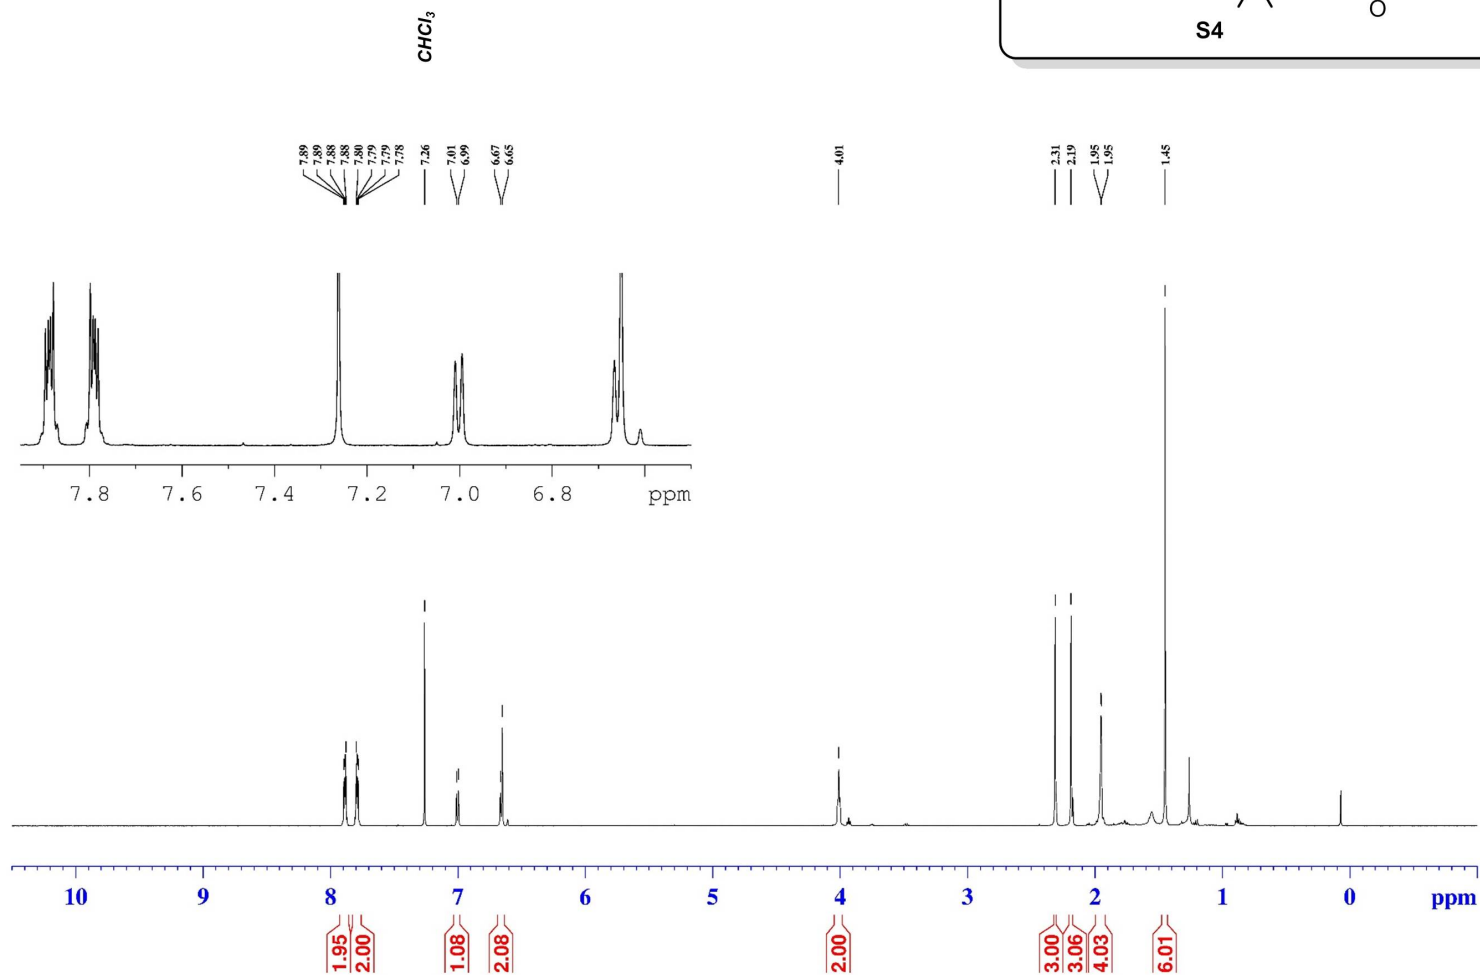

S103

1,3-Dioxoisindolin-2-yl 5-(2,5-dimethylphenoxy)-2,2-dimethylpentanoate  
125 MHz, CDCl<sub>3</sub>

<sup>13</sup>C NMR

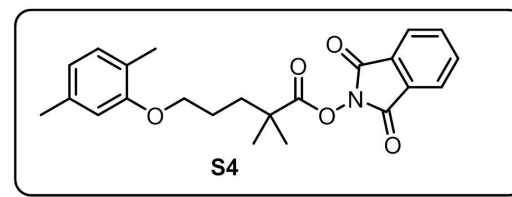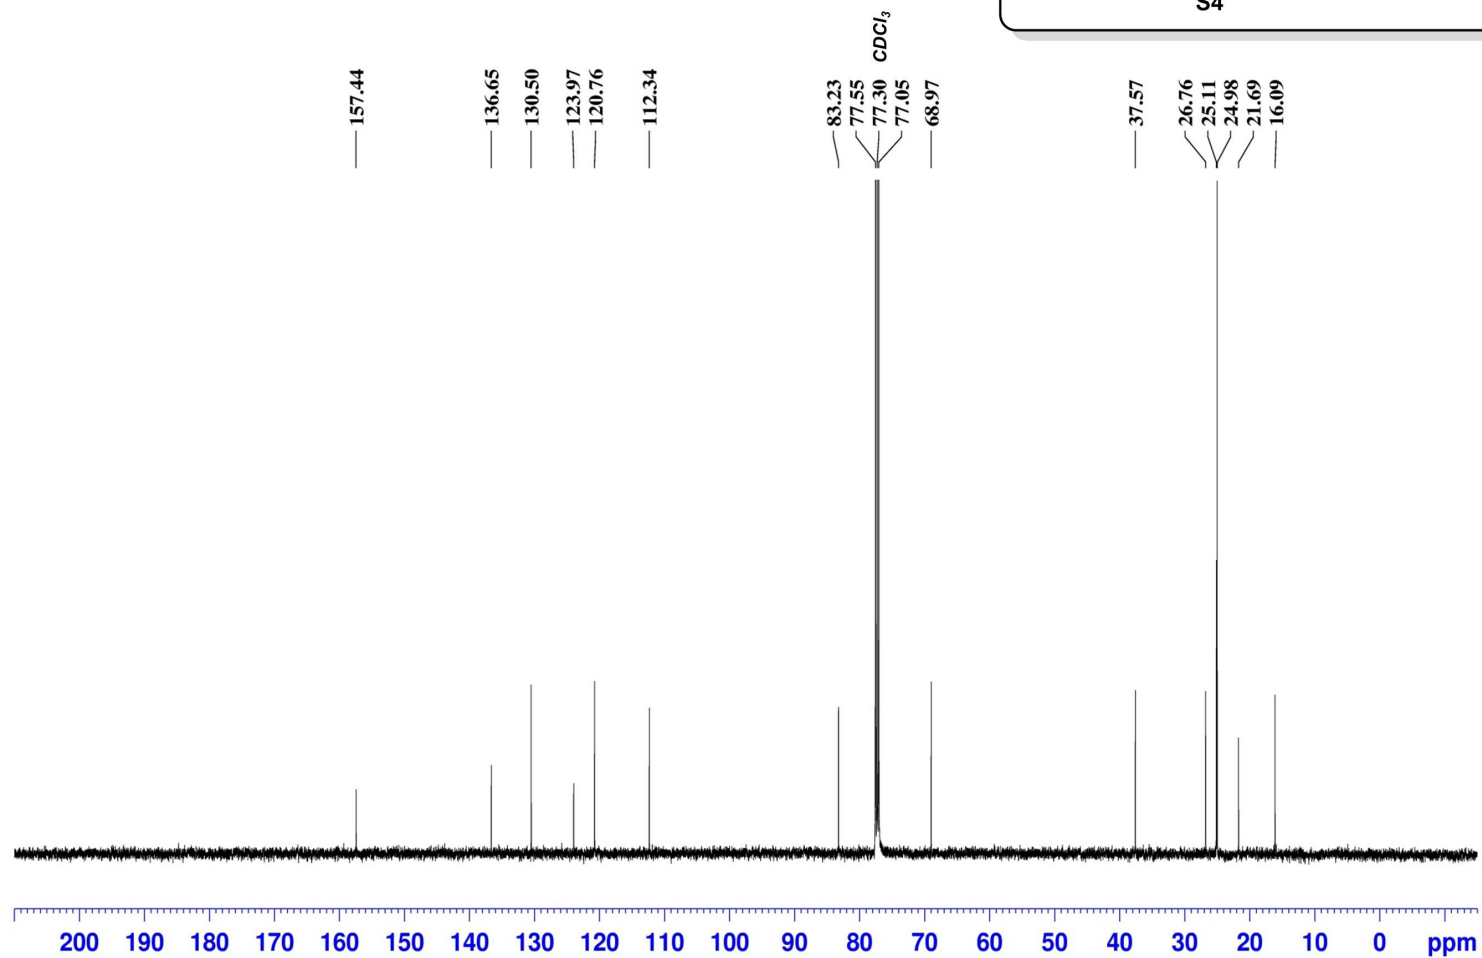

S104



(3*R*)-1,3-dioxoisindolin-2-yl 3-isopropyl-1-methylcyclopentanecarboxylate <sup>1</sup>H NMR  
500 MHz, CDCl<sub>3</sub>

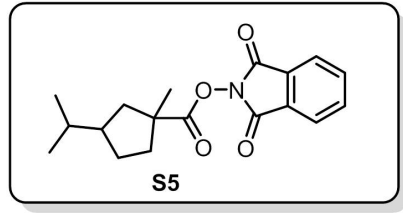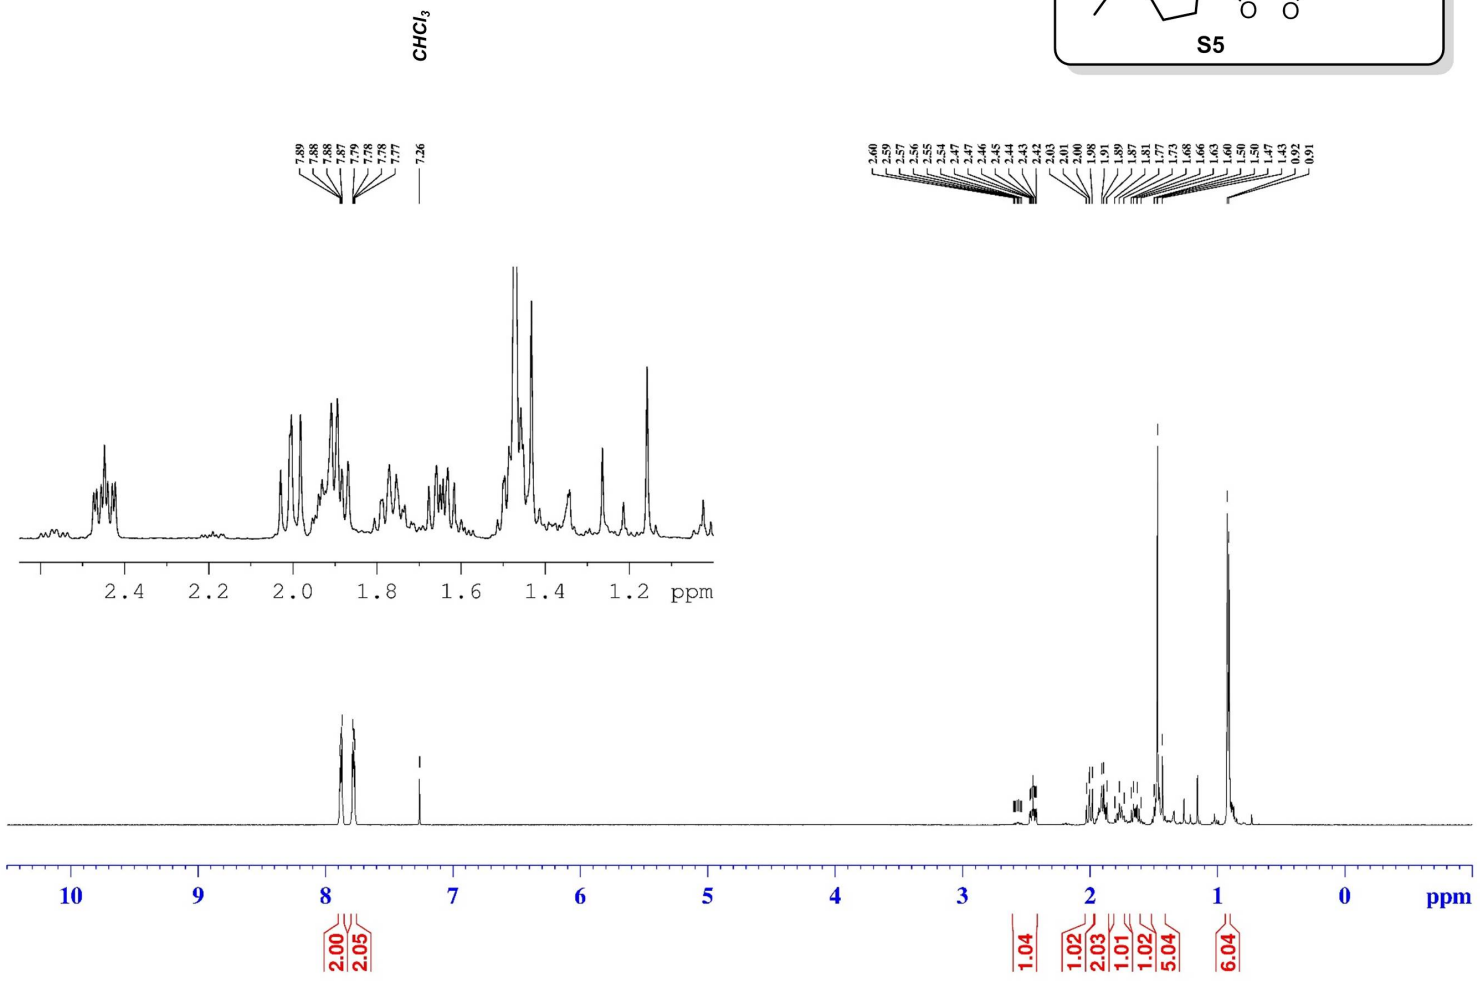

1,3-Dioxoisindolin-2-yl 3-isopropyl-1-methylcyclopentanecarboxylate  
125 MHz, CDCl<sub>3</sub>

<sup>13</sup>C NMR

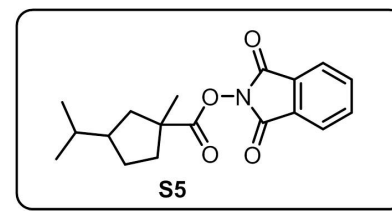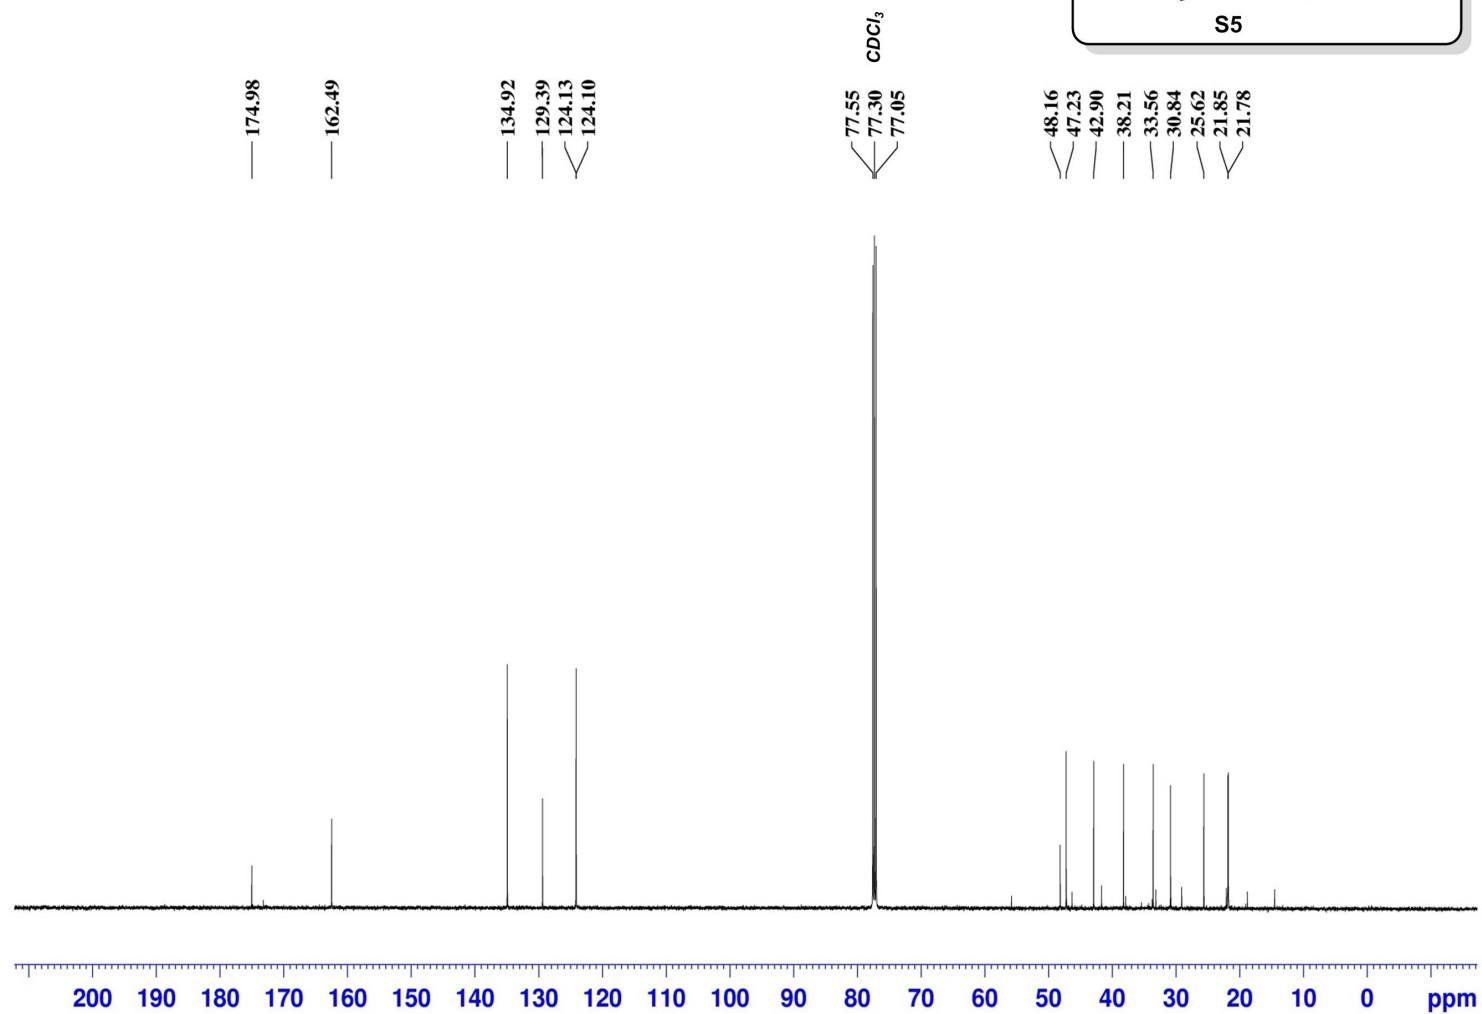

S106

**<sup>1</sup>H NMR**  
2-(5-(2,5-dimethylphenoxy)-2-methylpentan-2-yl)-4,4,5,5-tetramethyl-1,3,2-dioxaborolane  
500 MHz, CDCl<sub>3</sub>

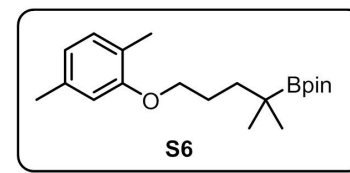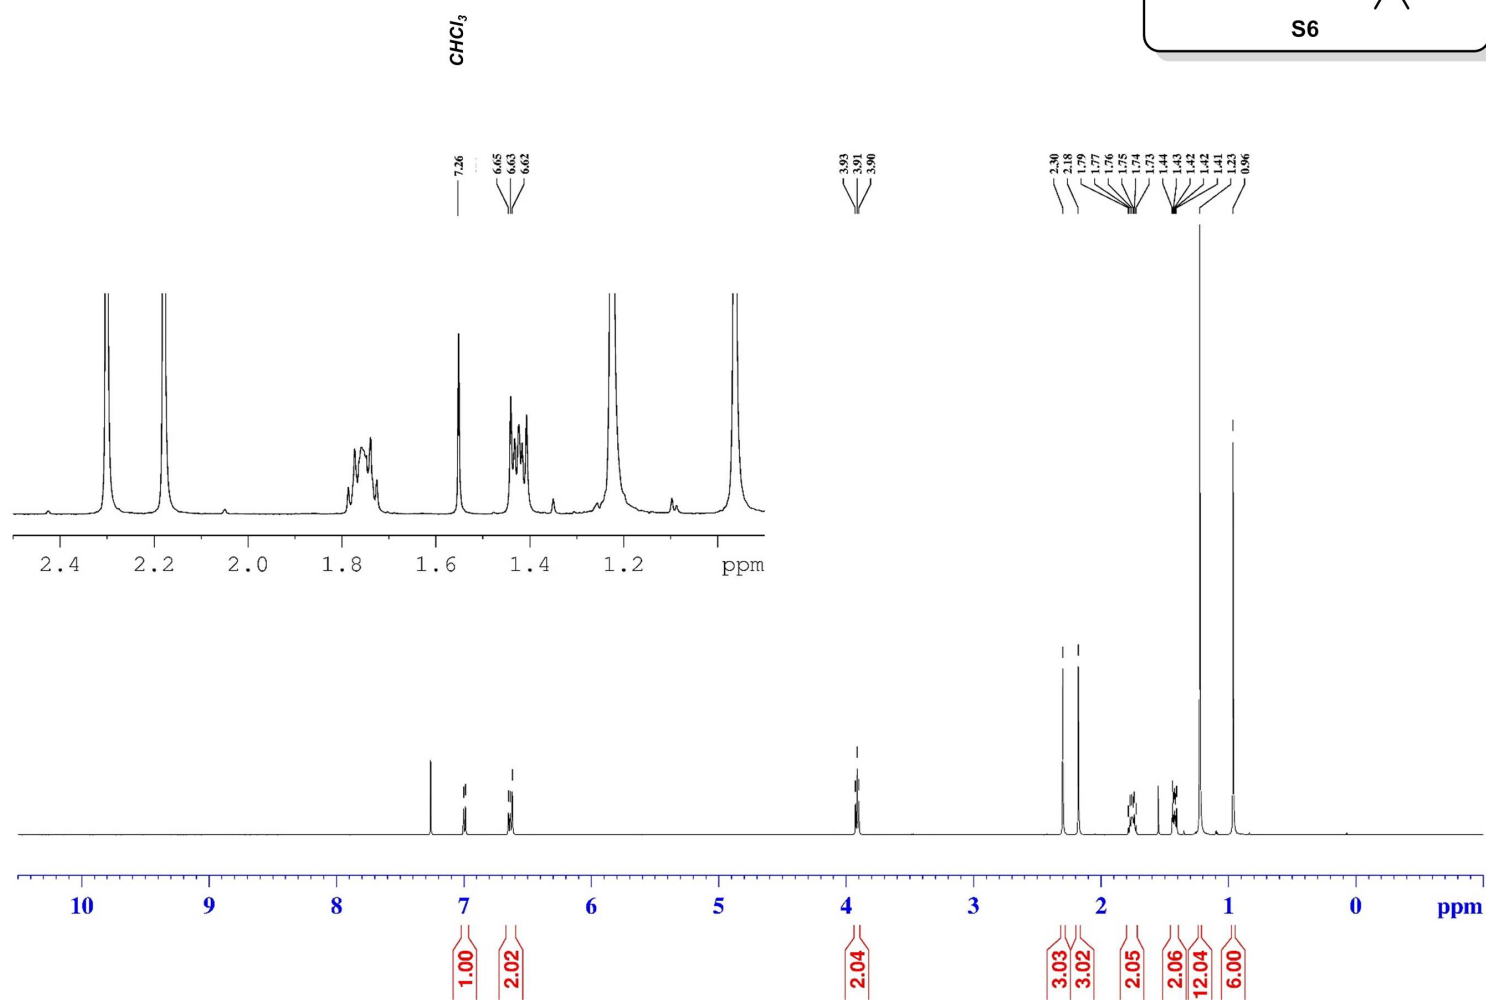

**S107**

**<sup>13</sup>C NMR**

2-(5-(2,5-Dimethylphenoxy)-2-methylpentan-2-yl)-4,4,5,5-tetramethyl-1,3,2-dioxaborolane  
125 MHz, CDCl<sub>3</sub>

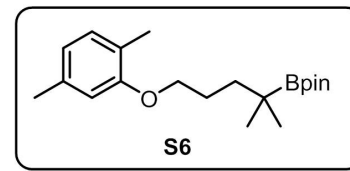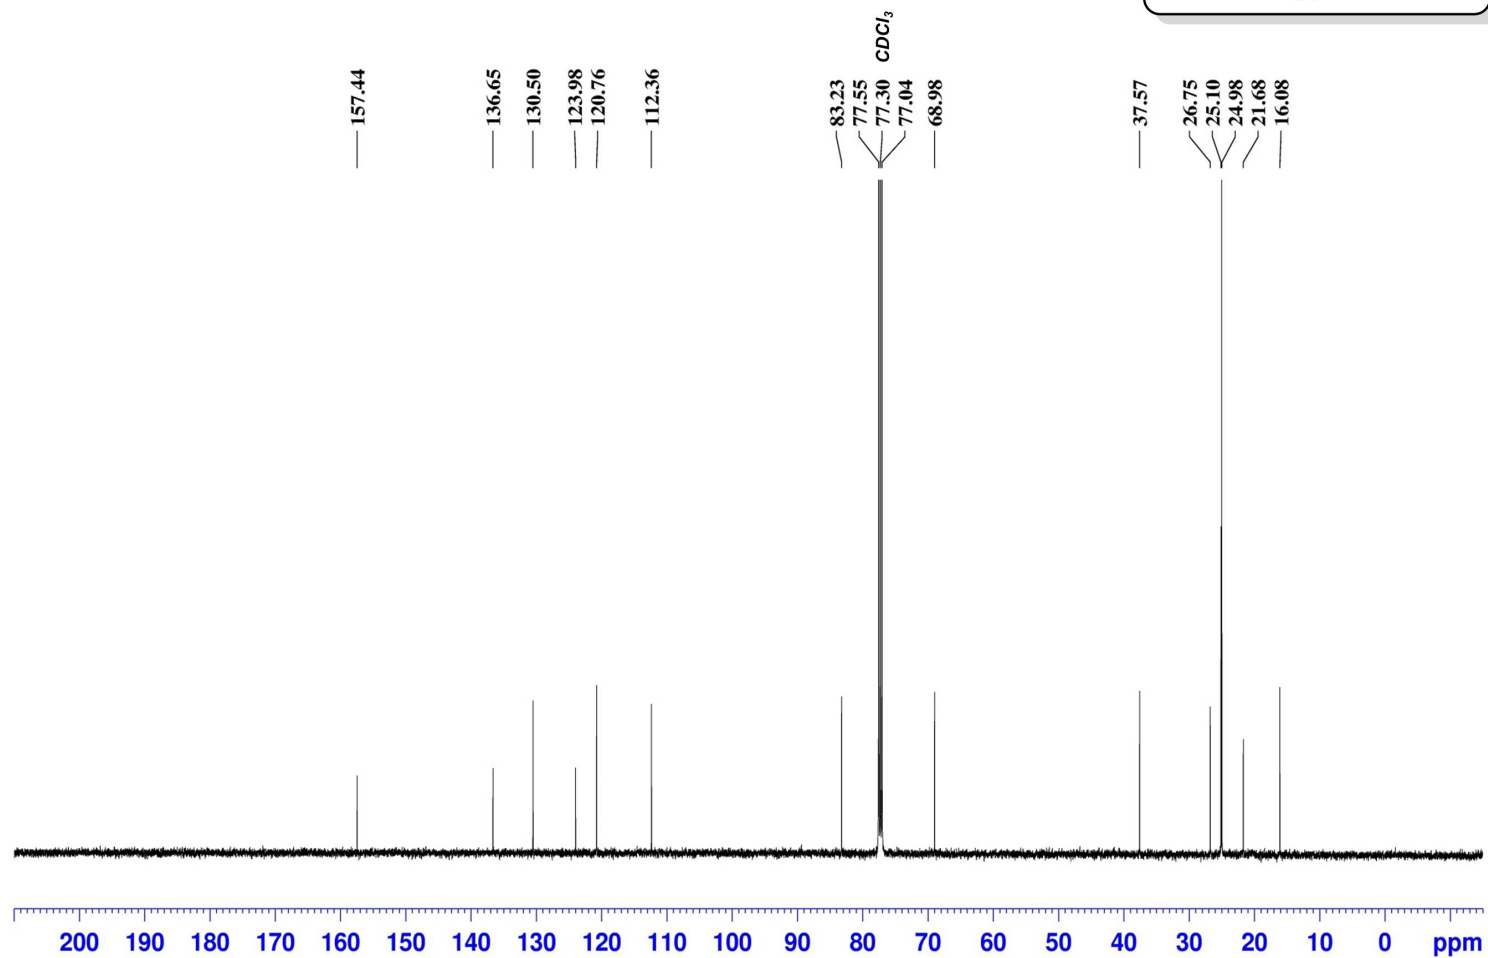

**<sup>11</sup>B NMR**

2-(5-(2,5-dimethylphenoxy)-2-methylpentan-2-yl)-4,4,5,5-tetramethyl-1,3,2-dioxaborolane  
128 MHz, CDCl<sub>3</sub>

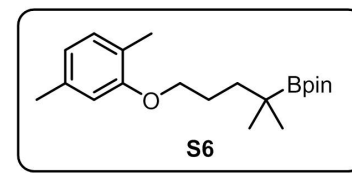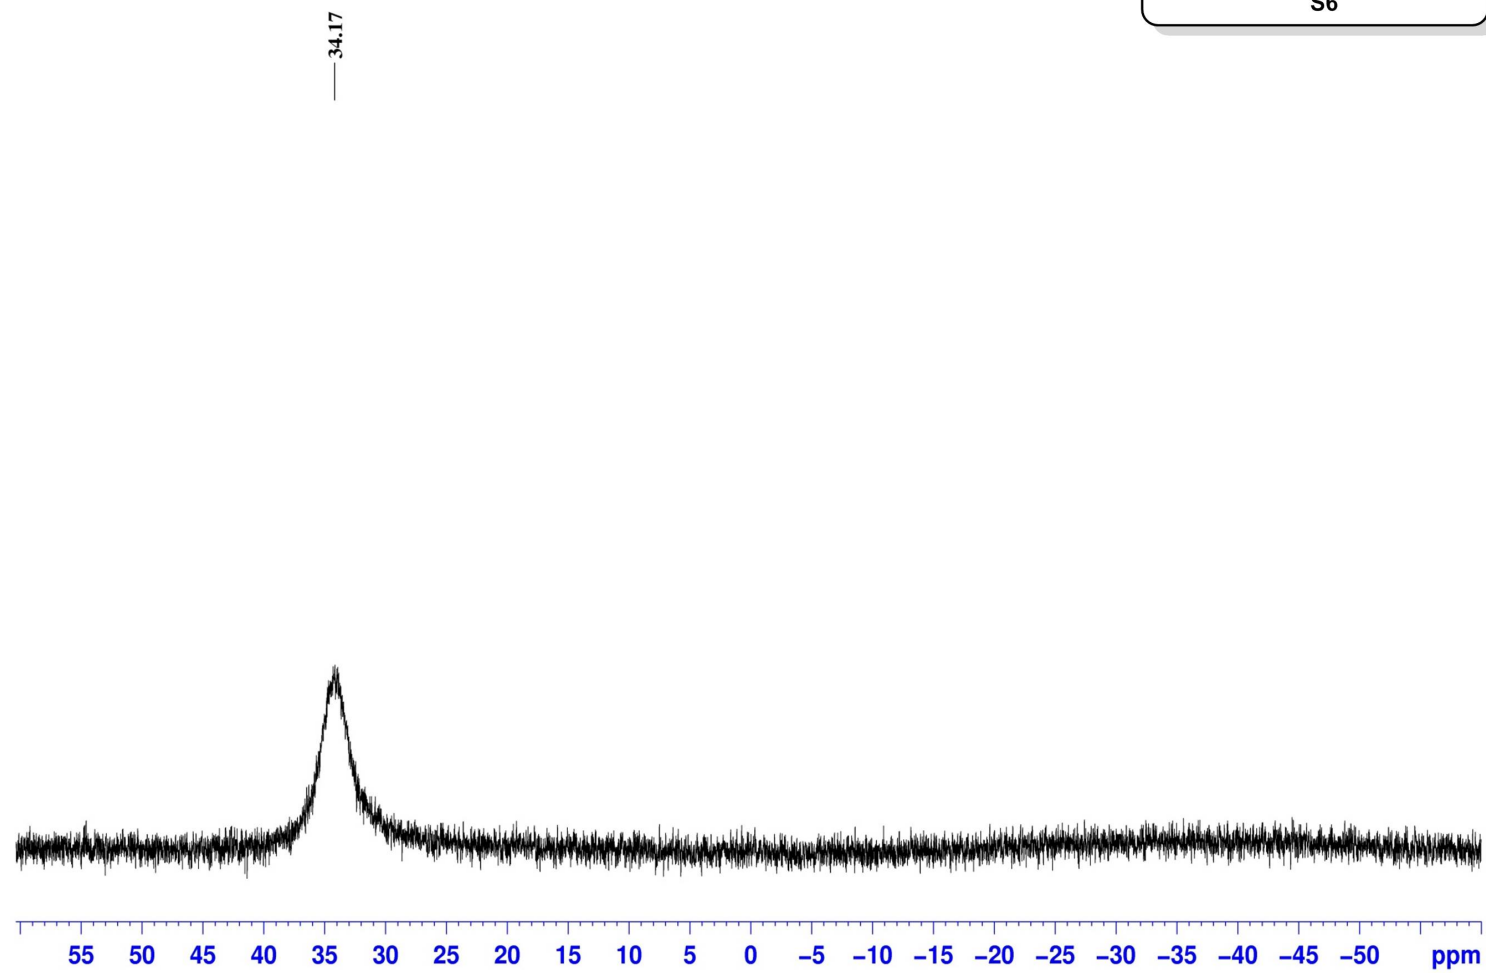

**<sup>1</sup>H NMR**

2-((3R)-3-isopropyl-1-methylcyclopentyl)-4,4,5,5-tetramethyl-1,3,2-dioxaborolane  
500 MHz, CDCl<sub>3</sub>

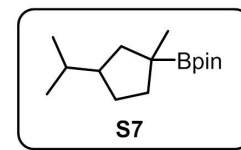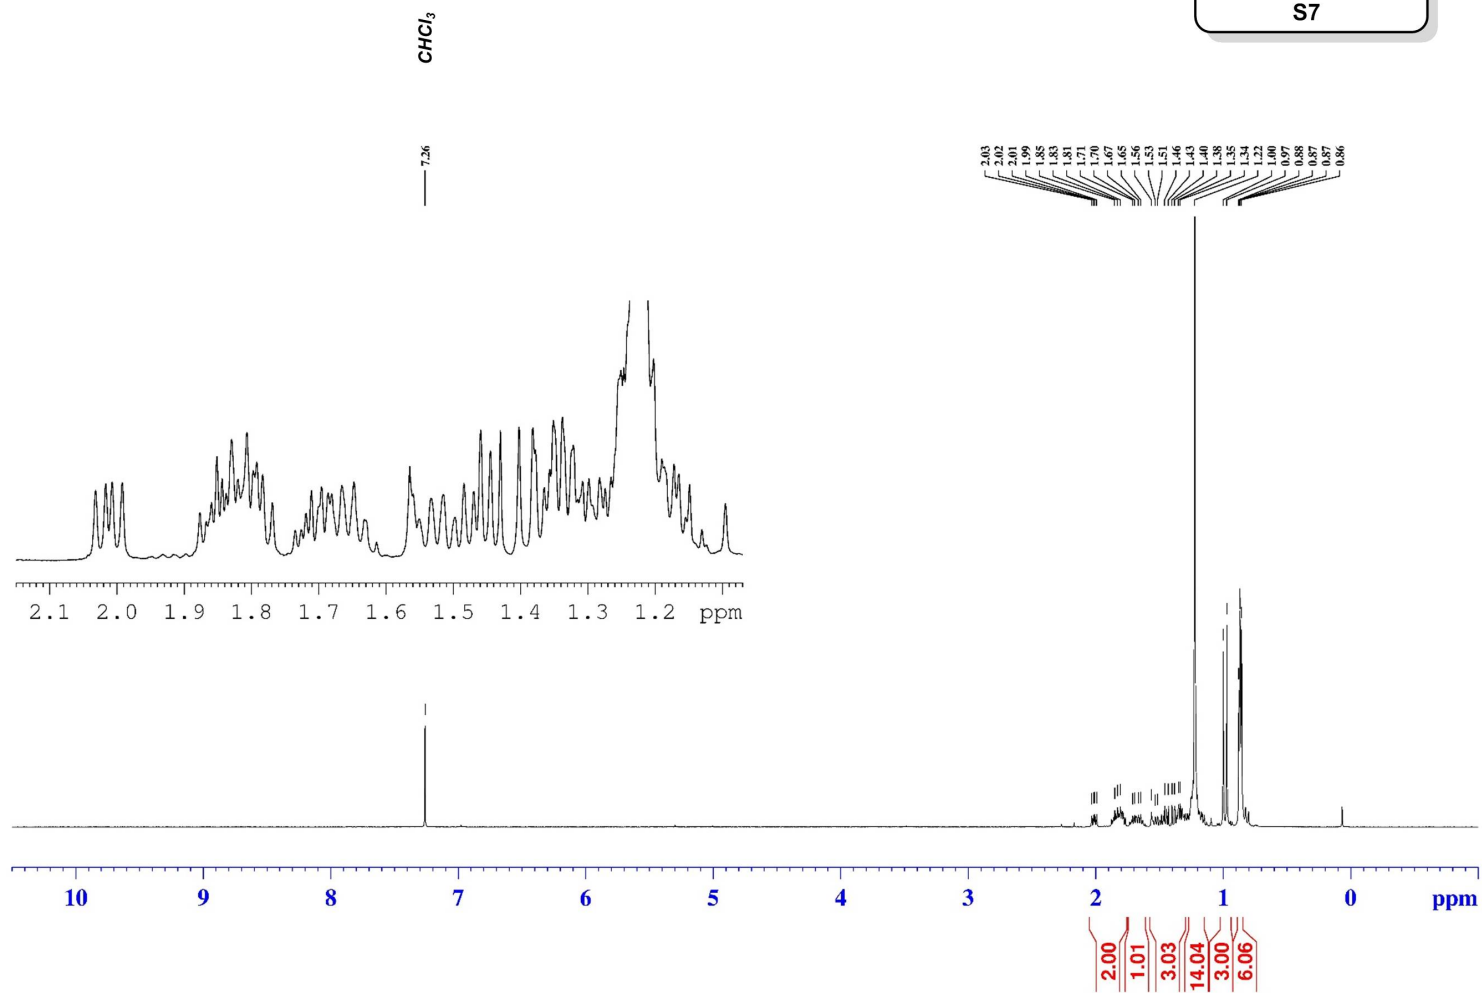

**S110**

<sup>13</sup>C NMR

2-(3-Isopropyl-1-methylcyclopentyl)-4,4,5,5-tetramethyl-1,3,2-dioxaborolane  
125 MHz, CDCl<sub>3</sub>

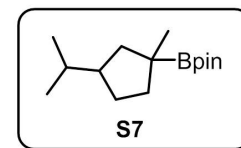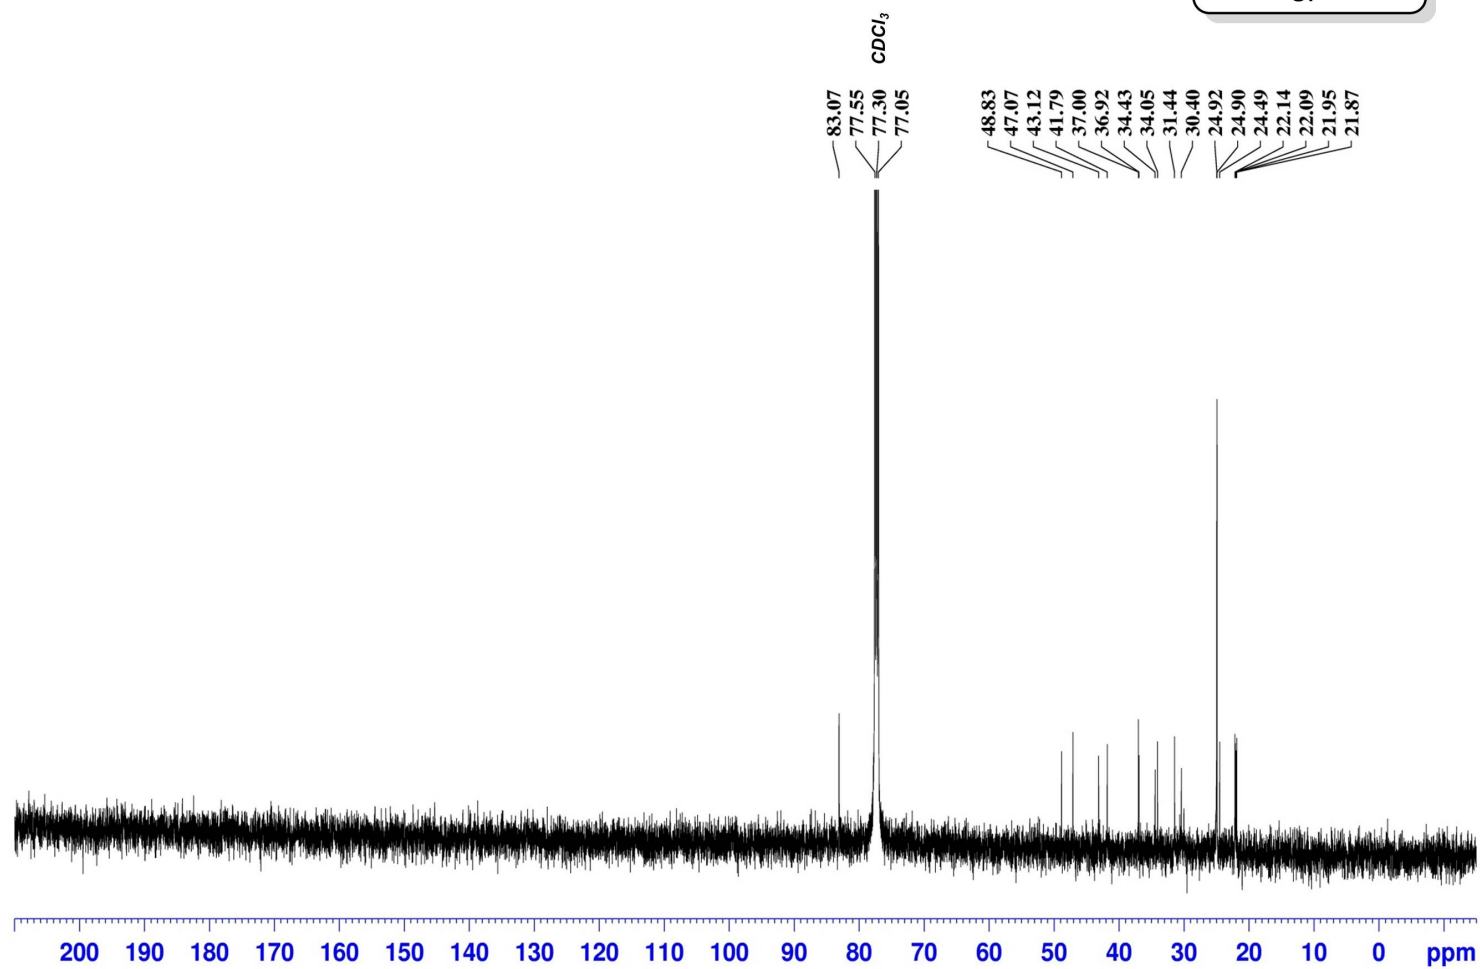

S111

**<sup>11</sup>B NMR**

2-((3R)-3-isopropyl-1-methylcyclopentyl)-4,4,5,5-tetramethyl-1,3,2-dioxaborolane  
128 MHz, CDCl<sub>3</sub>

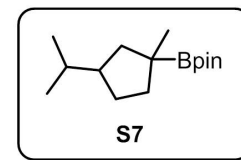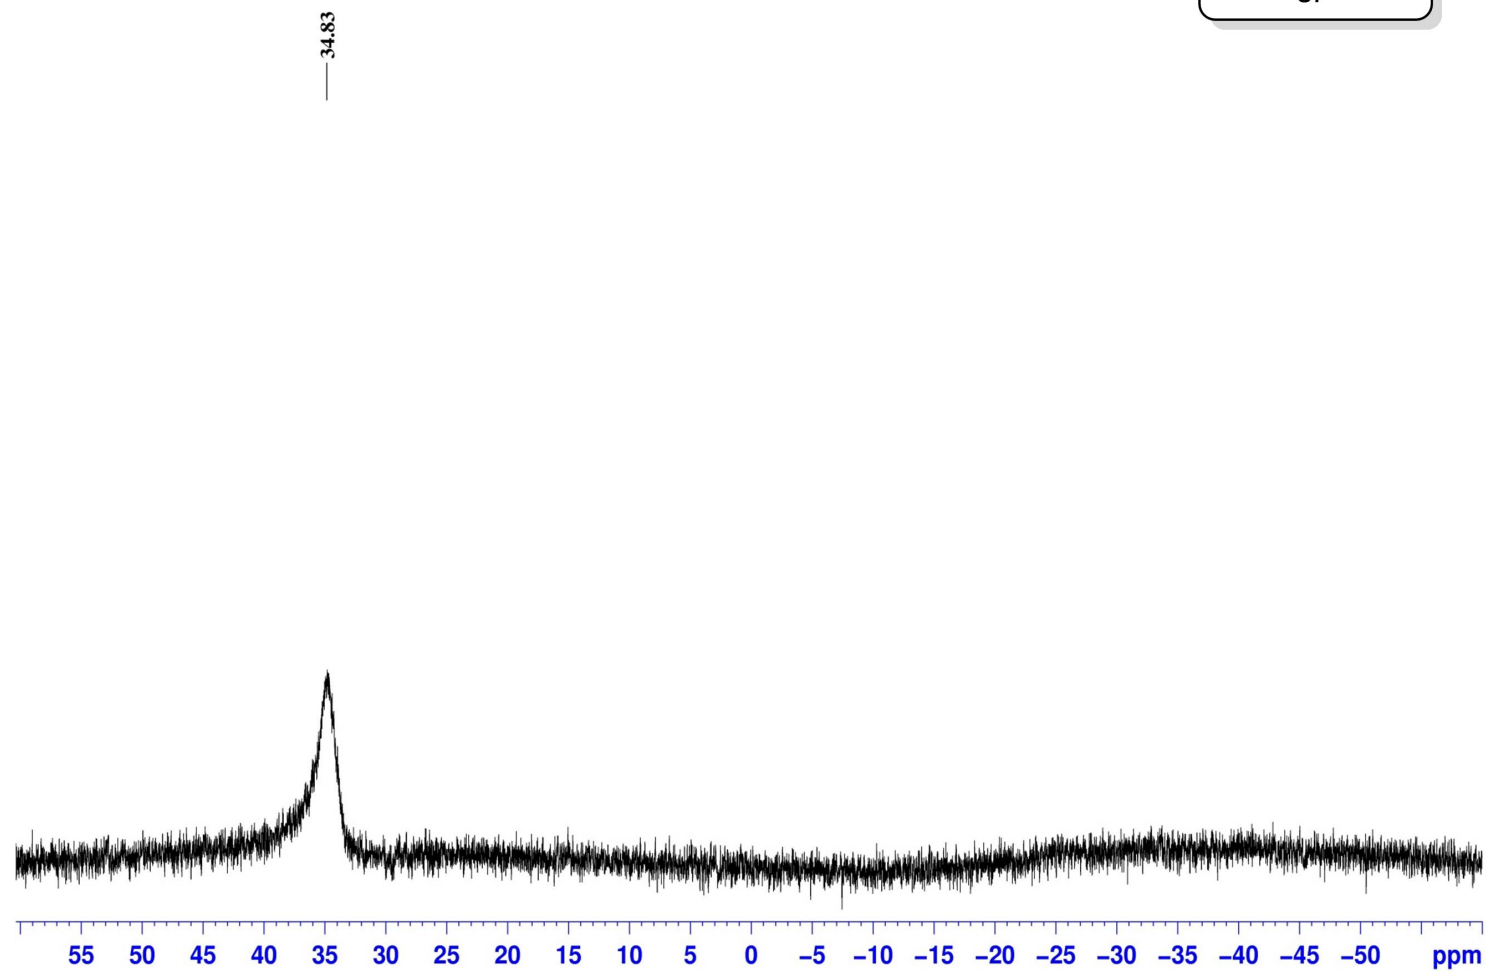

**S112**



# <sup>1</sup>H NMR

Potassium (5-(2,5-dimethylphenoxy)-2-methylpentan-2-yl)trifluoroborate  
500 MHz, Acetone-d<sub>6</sub>

H<sub>2</sub>O  
HDO

Acetone-d<sub>5</sub>

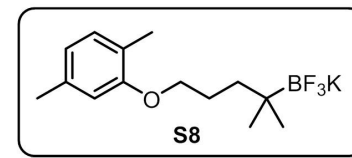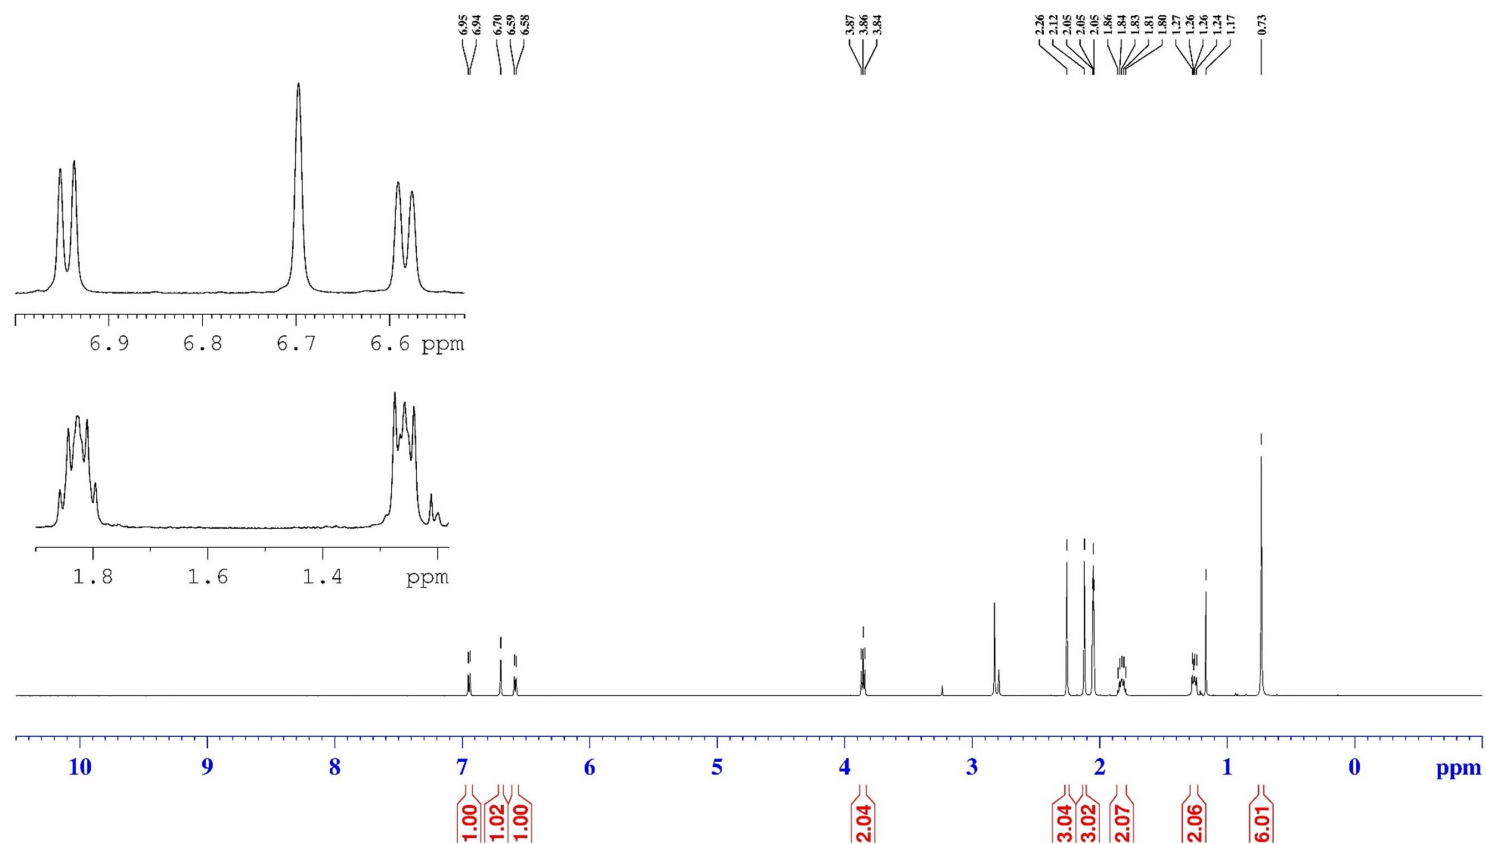

<sup>13</sup>C NMR

Potassium (5-(2,5-dimethylphenoxy)-2-methylpentan-2-yl)trifluoroborate  
125 MHz, Acetone-d<sub>6</sub>

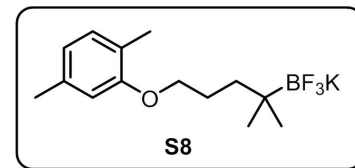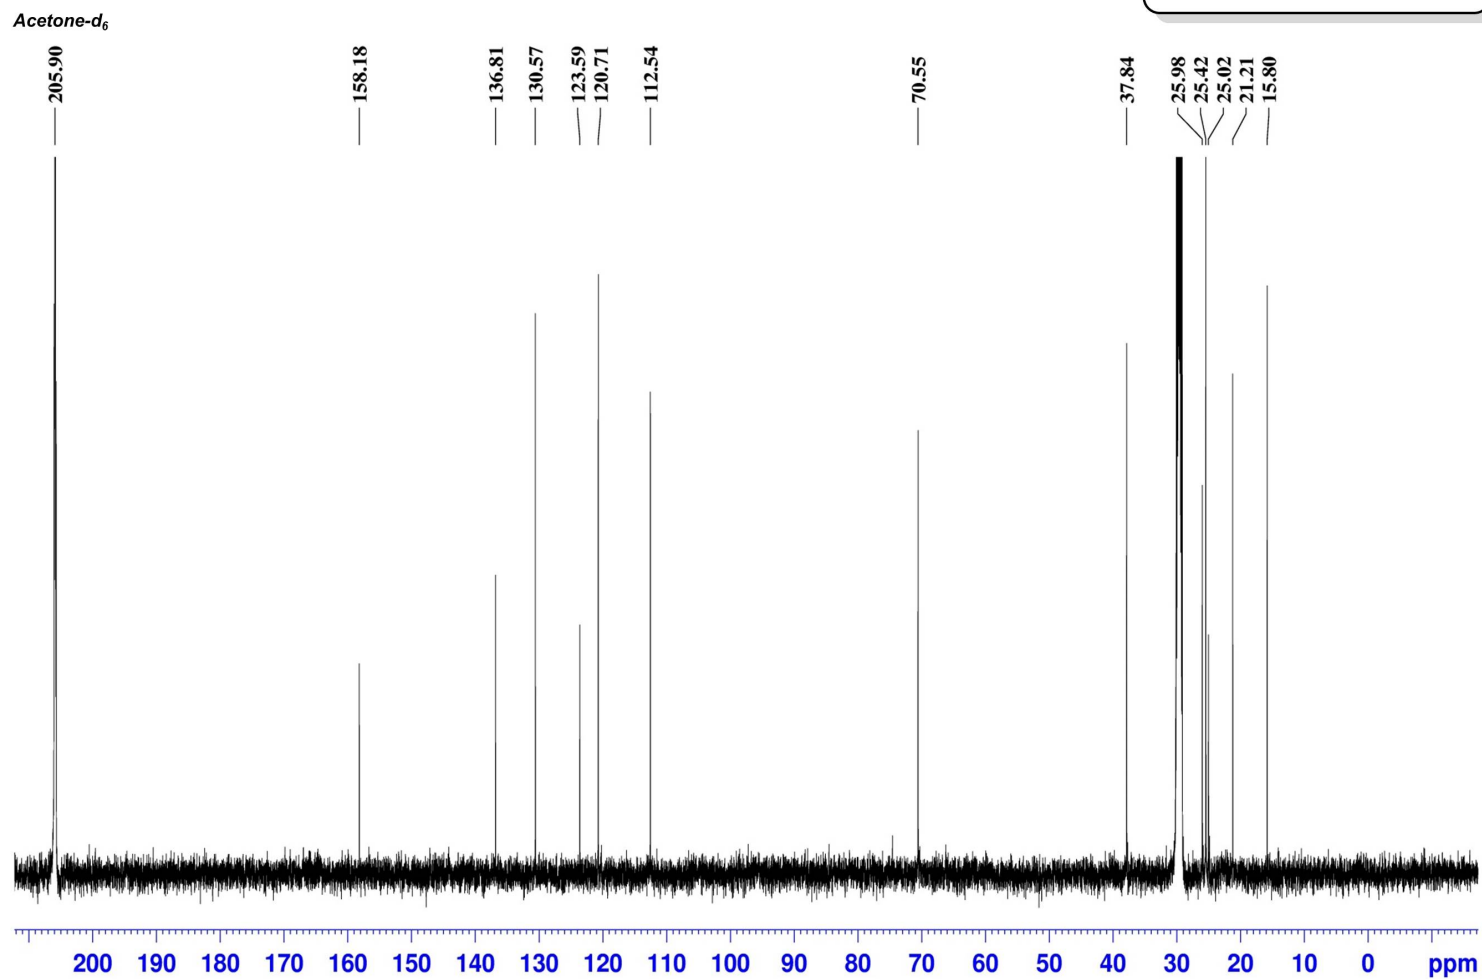

Potassium (5-(2,5-dimethylphenoxy)-2-methylpentan-2-yl)trifluoroborate  
471 MHz, Acetone- $d_6$

$^{19}\text{F}$  NMR

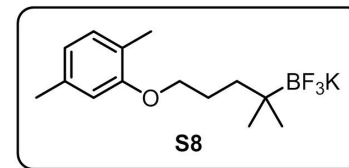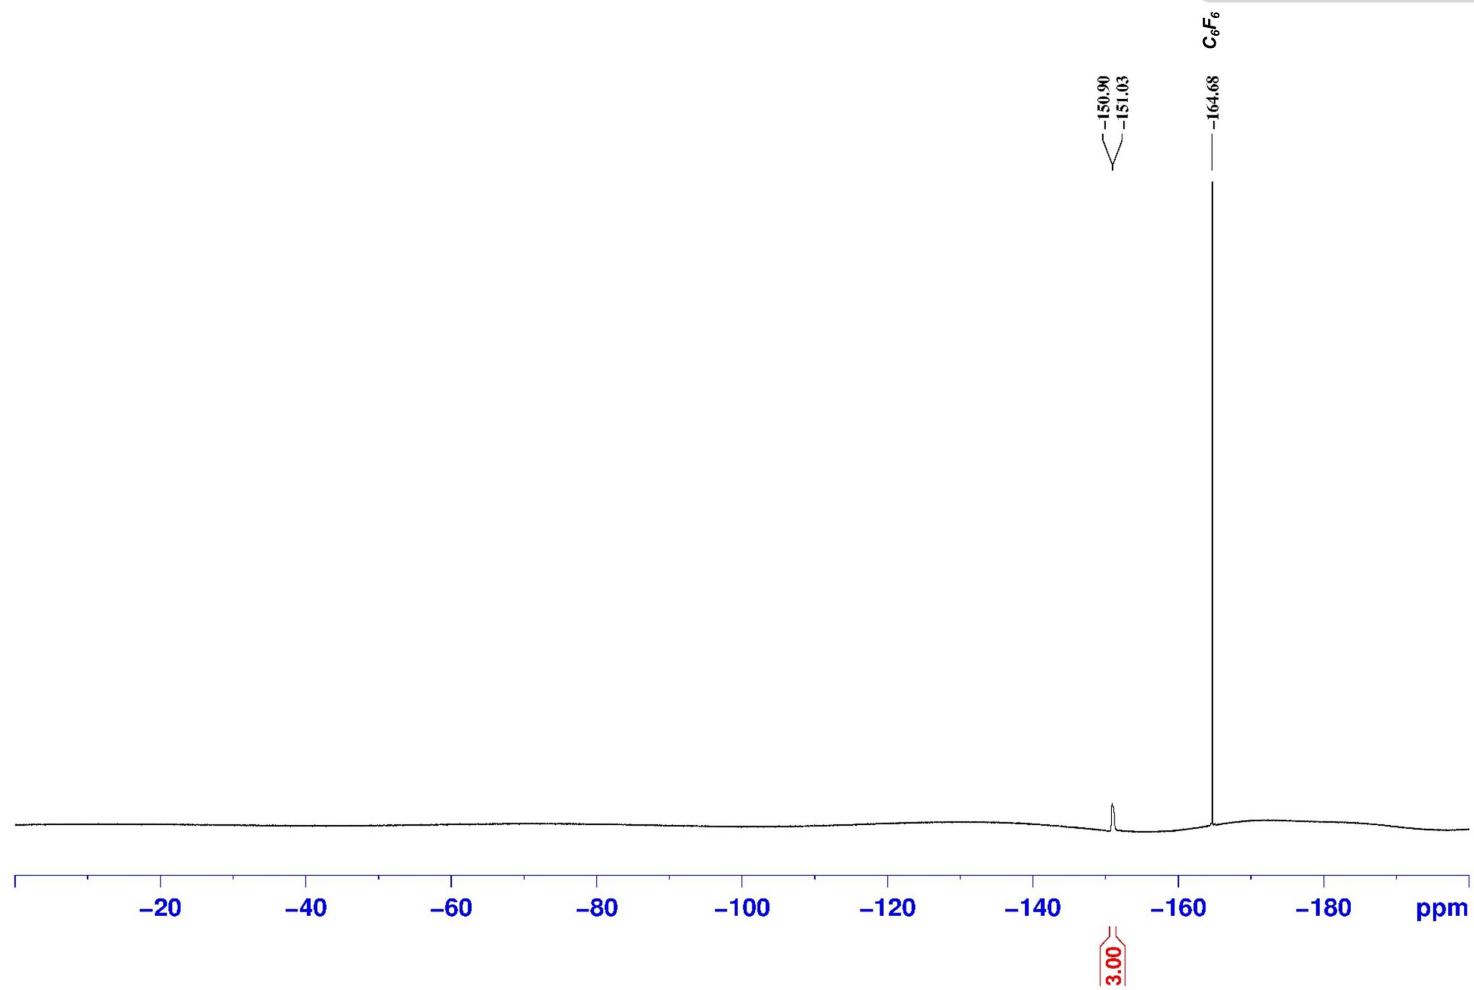

S115

Potassium (5-(2,5-dimethylphenoxy)-2-methylpentan-2-yl)trifluoroborate  
128 MHz, Acetone- $d_6$

$^{11}\text{B}$  NMR

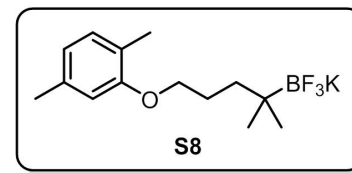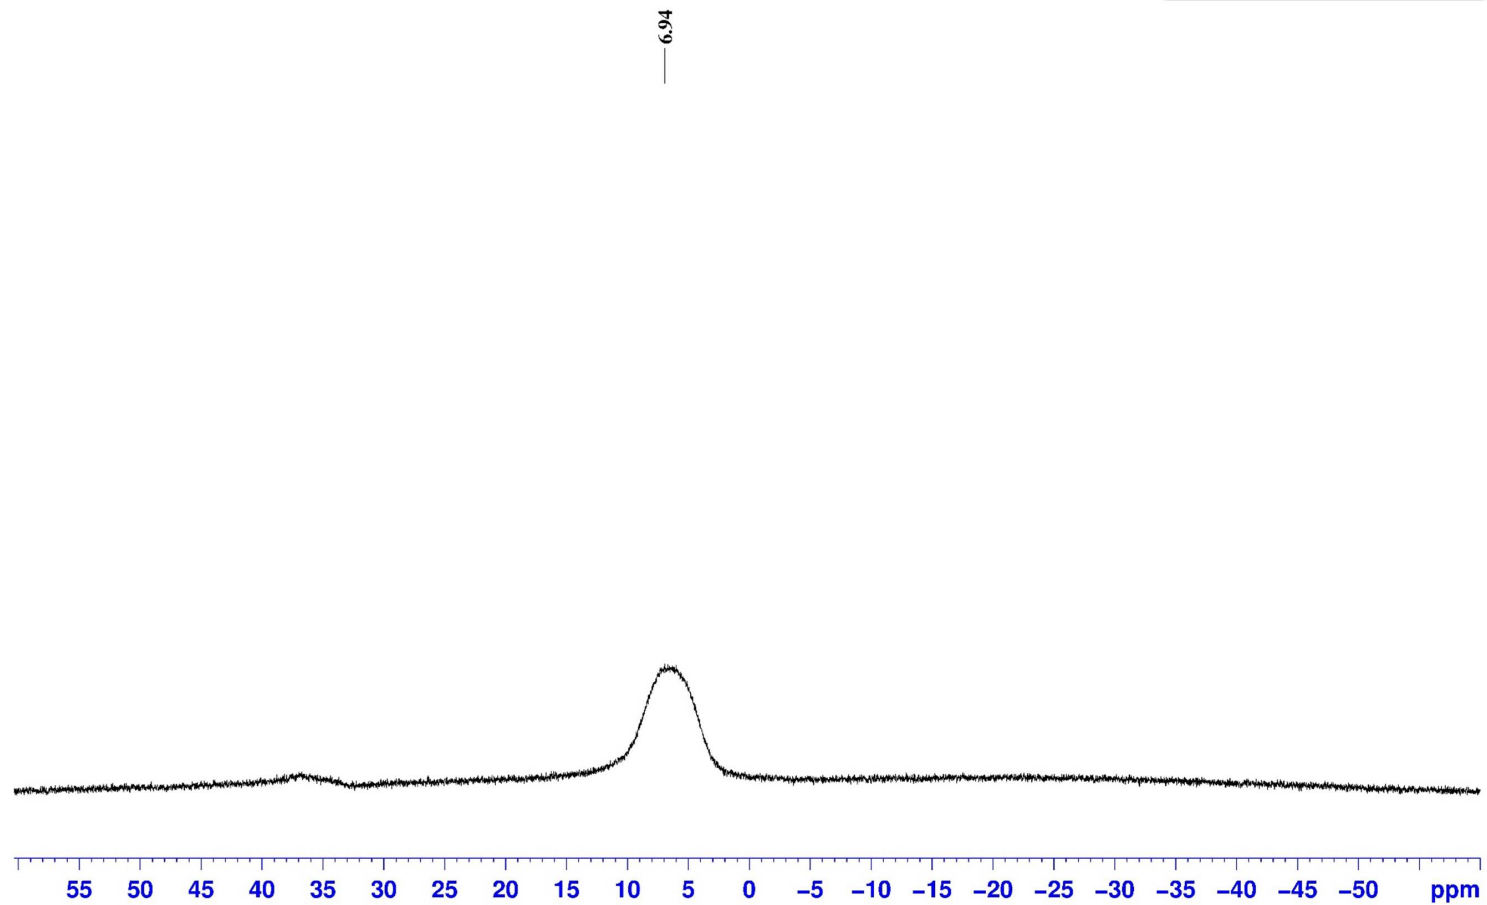

S116

Potassium ((3*R*)-3-isopropyl-1-methylcyclopentyl)trifluoroborate  
500 MHz, Acetone-*d*<sub>6</sub>

<sup>1</sup>H NMR

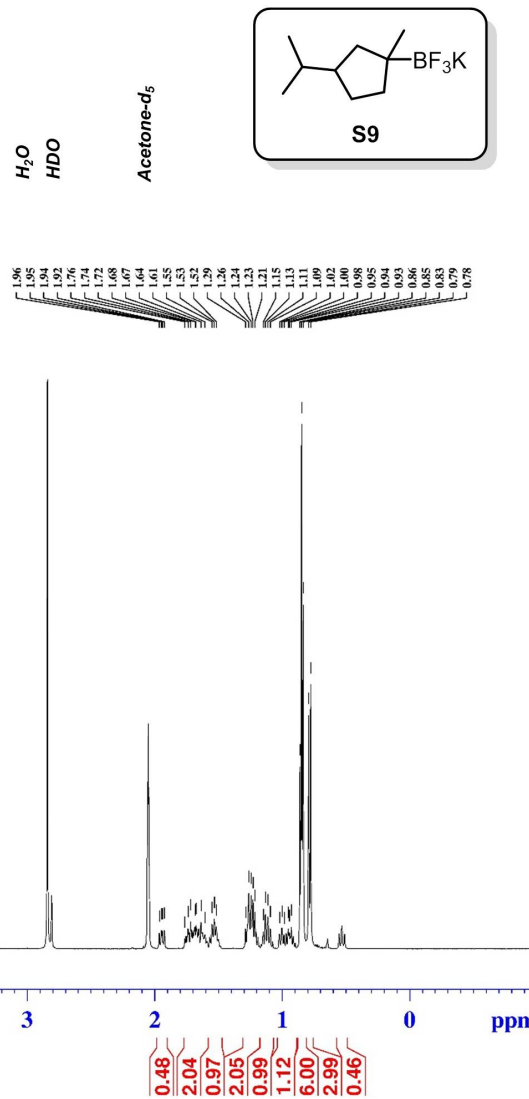

S117

<sup>13</sup>C NMR

Potassium (3-isopropyl-1-methylcyclopentyl)trifluoroborate  
125 MHz, Acetone-d<sub>6</sub>

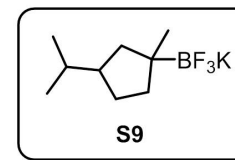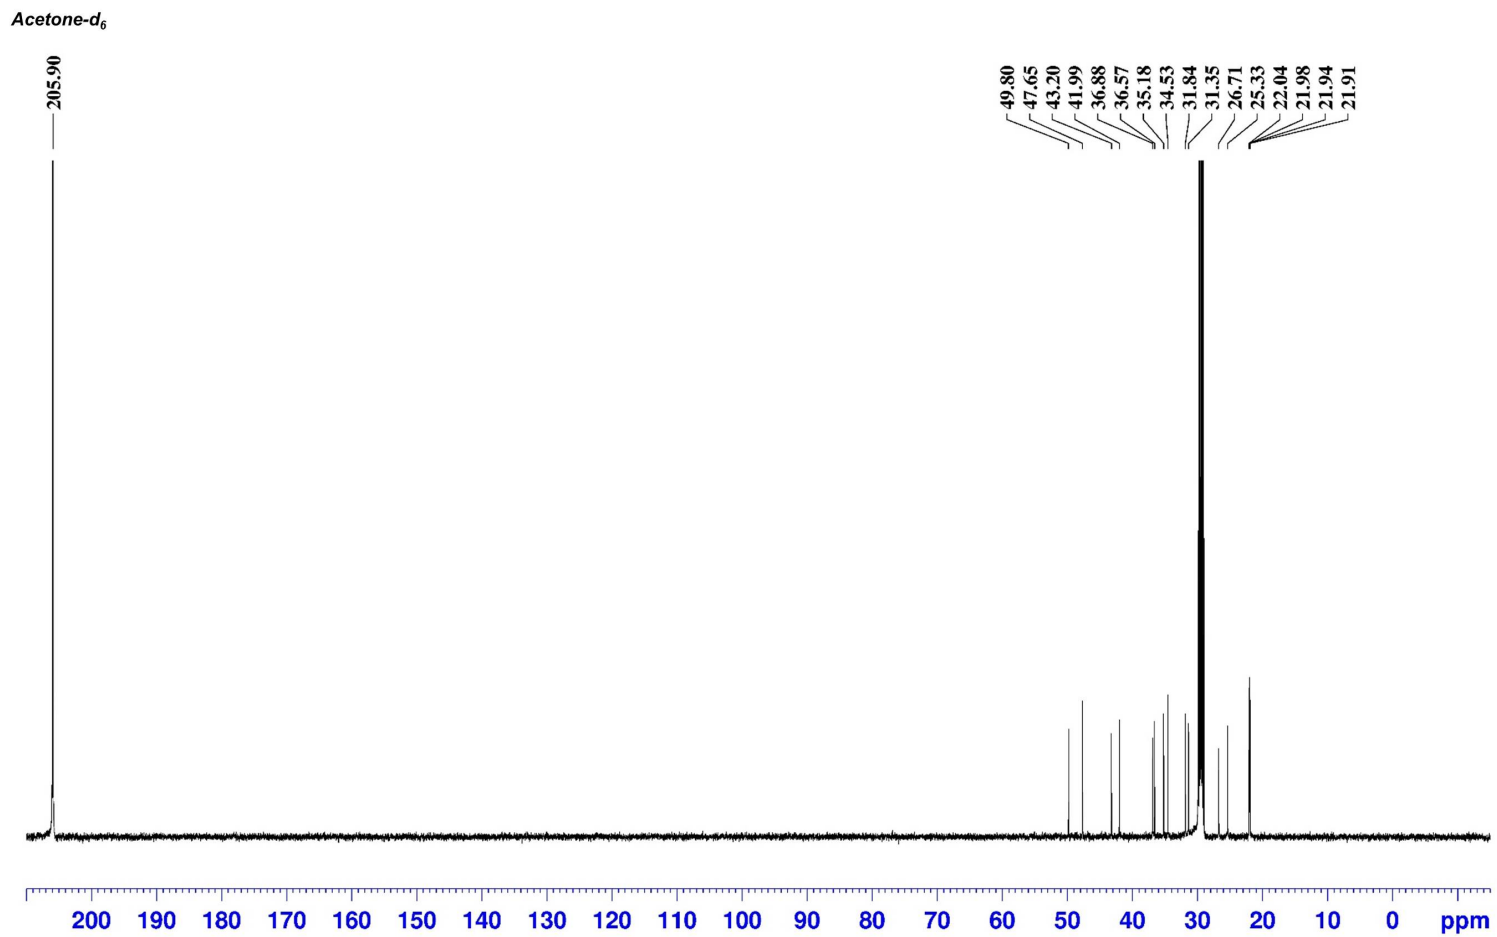

Potassium ((3*R*)-3-isopropyl-1-methylcyclopentyl)trifluoroborate  
471 MHz, Acetone-*d*<sub>6</sub>

<sup>19</sup>F NMR

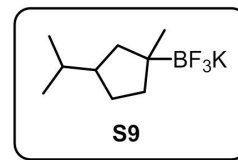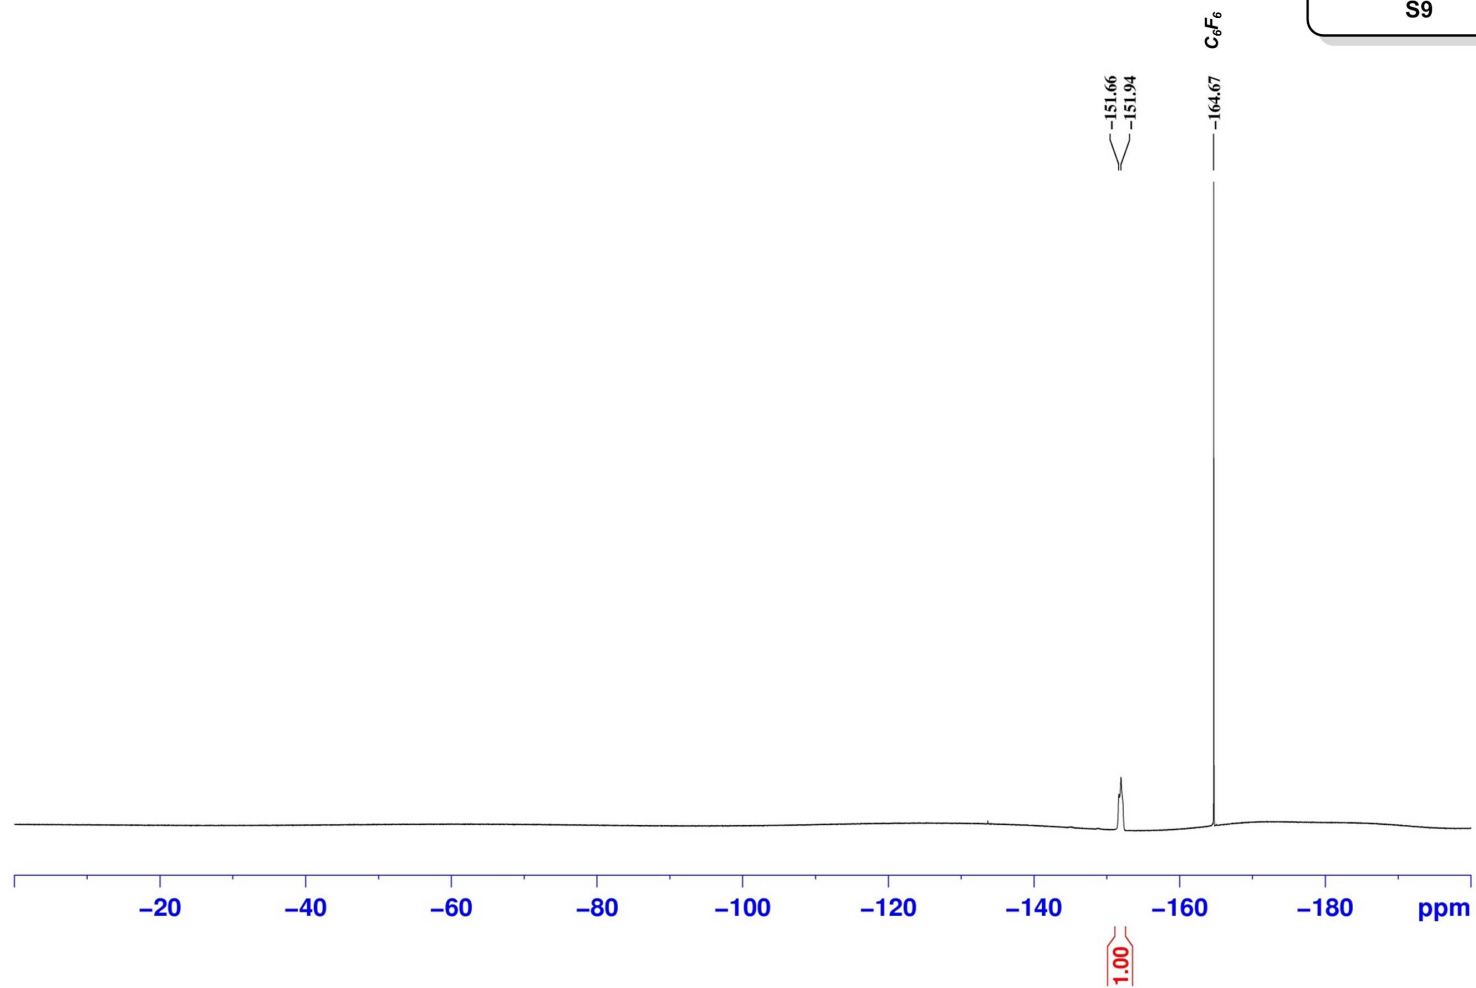

S119

Potassium ((3*R*)-3-isopropyl-1-methylcyclopentyl)trifluoroborate  
128 MHz, Acetone-*d*<sub>6</sub>

<sup>11</sup>B NMR

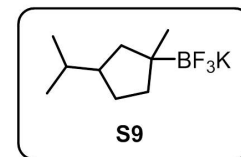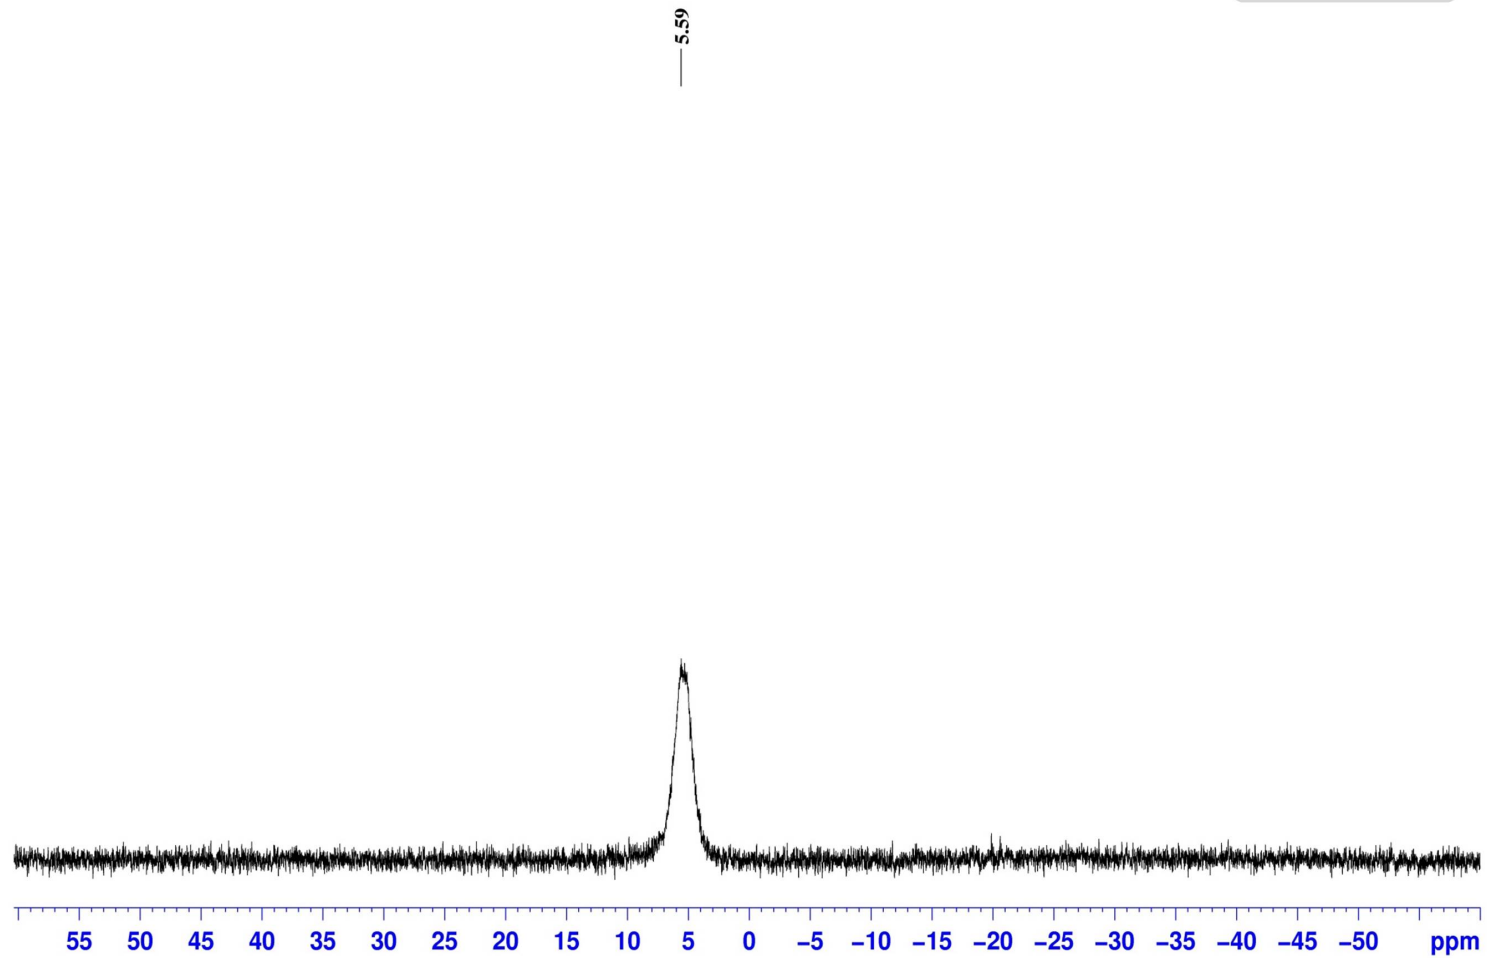

S120



Potassium (4-pentylbicyclo[2.2.2]octan-1-yl)trifluoroborate  
500 MHz, Acetone-*d*<sub>6</sub>

<sup>1</sup>H NMR

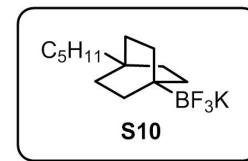

H<sub>2</sub>O  
HDO

Acetone-*d*<sub>6</sub>

2.09  
2.09  
2.09  
1.48  
1.48  
1.42  
1.34  
1.32  
1.31  
1.22  
1.21  
1.19  
1.01  
1.00  
0.98  
0.90  
0.89

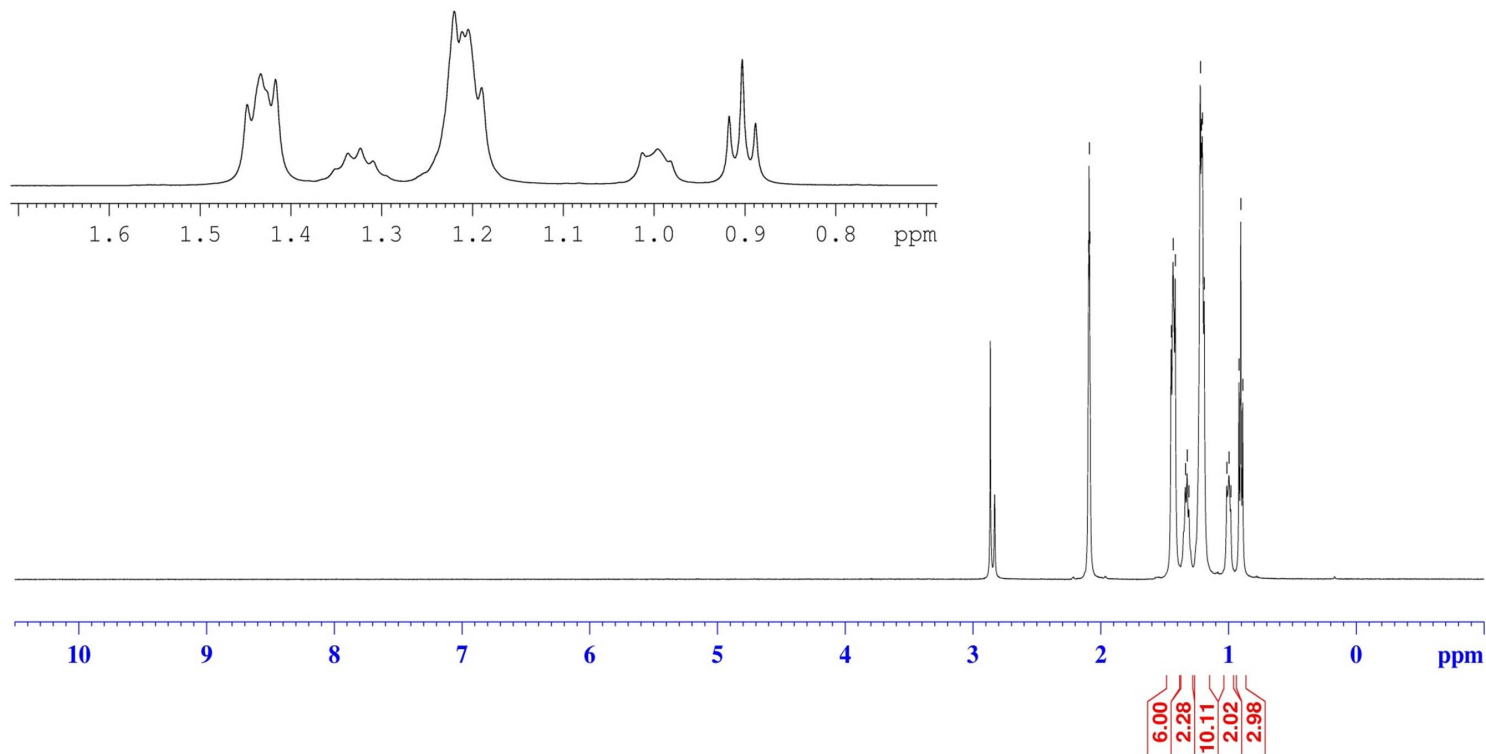

**S121**

**<sup>13</sup>C NMR**

Potassium (4-pentylbicyclo[2.2.2]octan-1-yl)trifluoroborate  
125 MHz, Acetone-*d*<sub>6</sub>

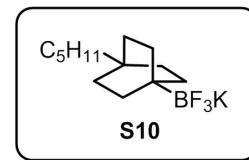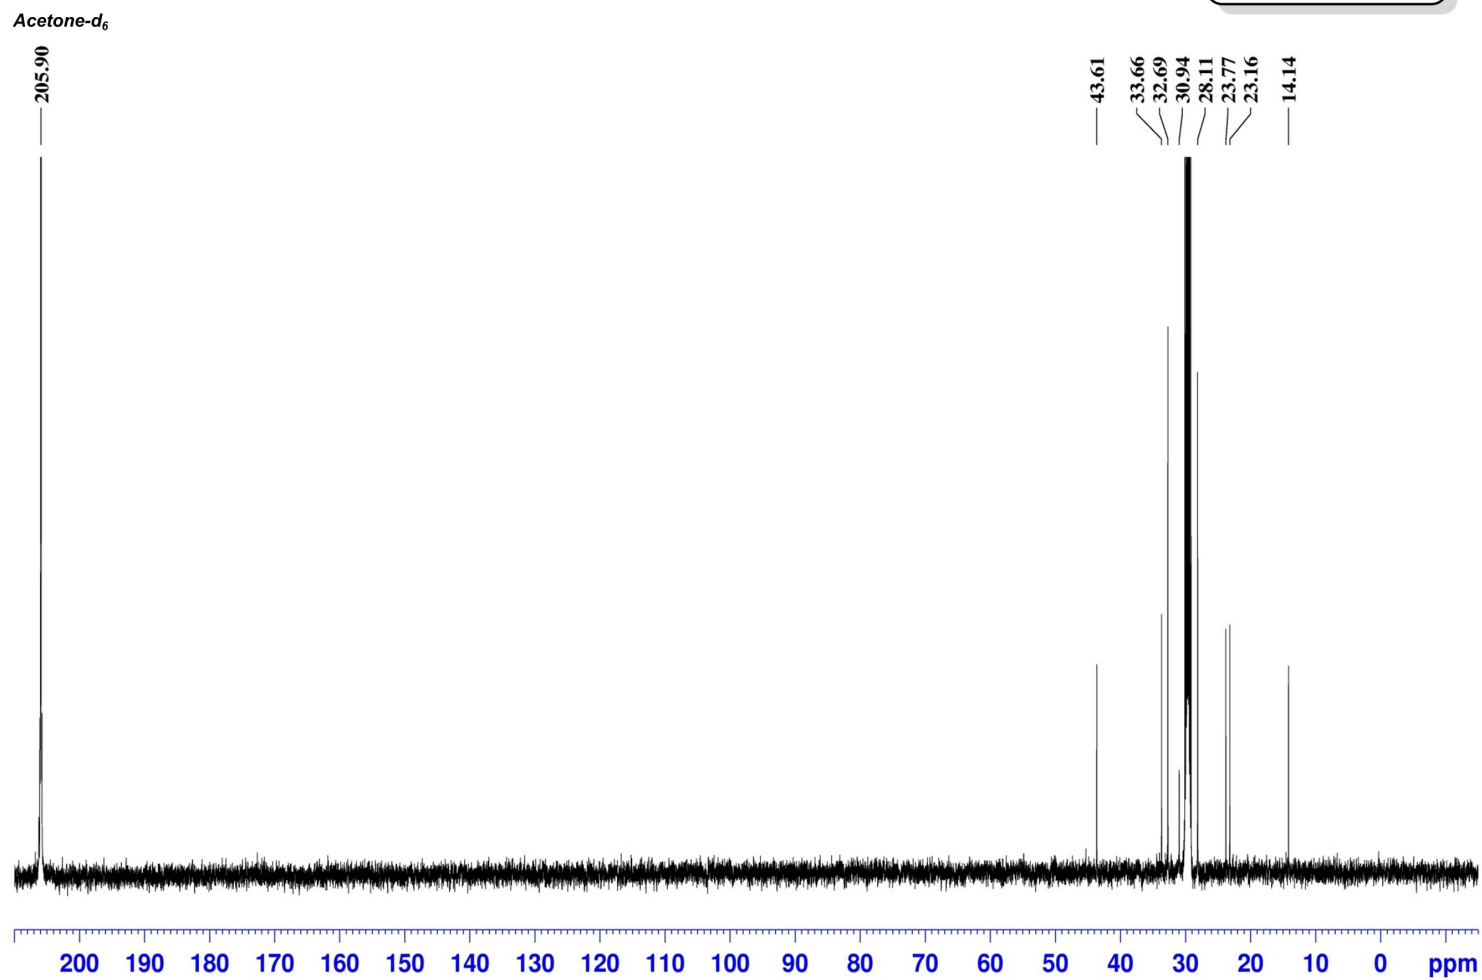

**S122**

Potassium (4-pentylbicyclo[2.2.2]octan-1-yl)trifluoroborate  
471 MHz, Acetone- $d_6$

$^{19}\text{F}$  NMR

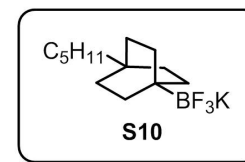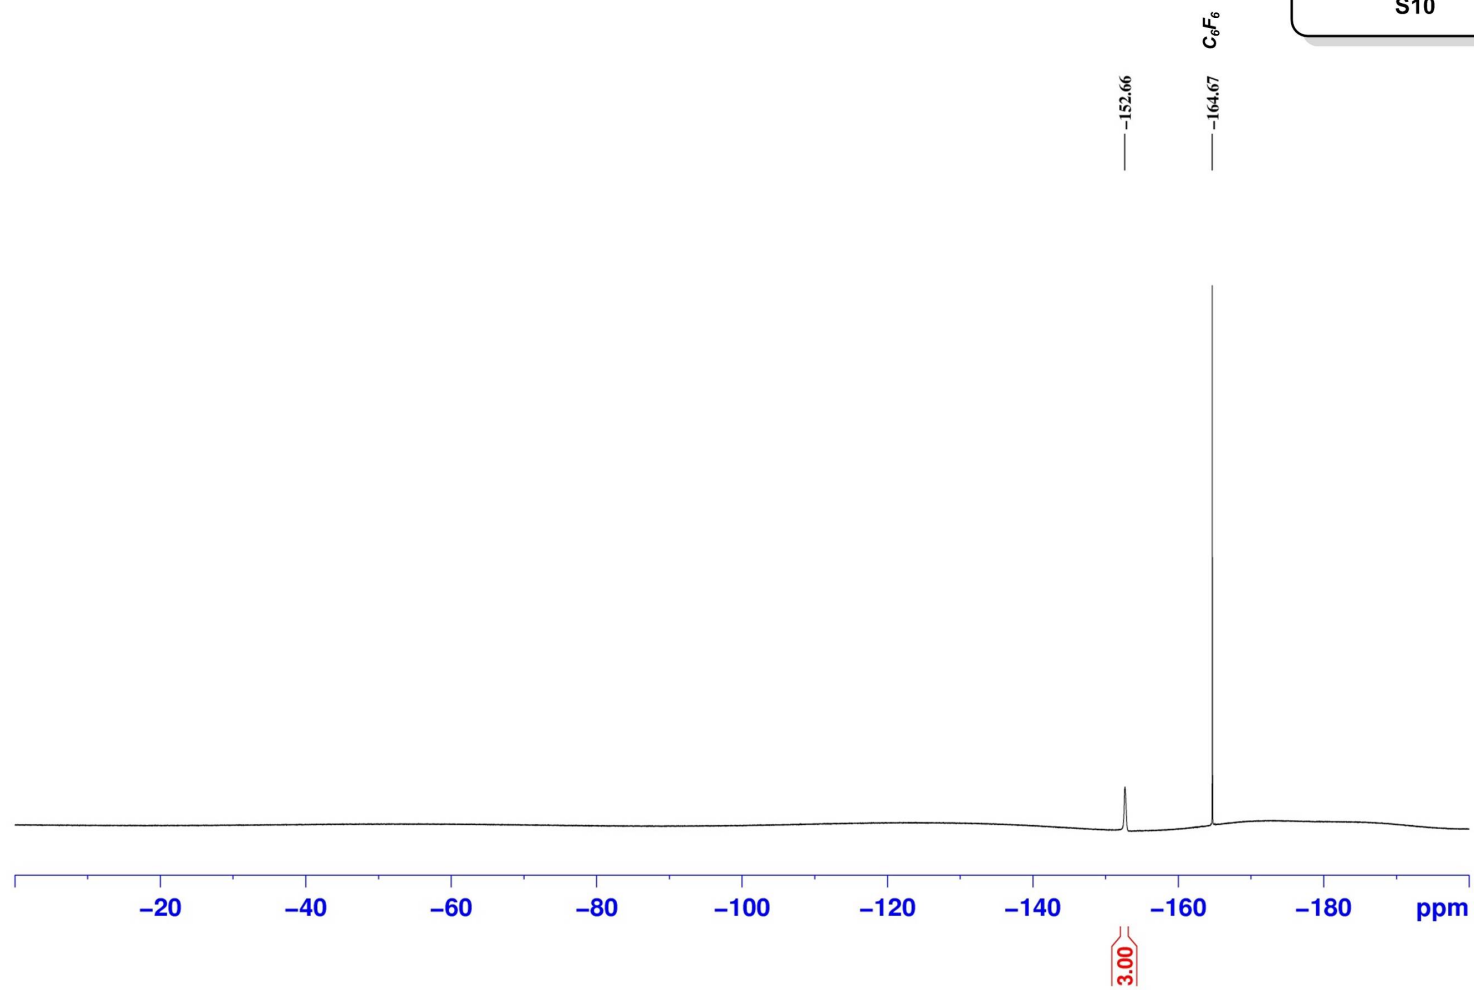

S123

Potassium (4-pentylbicyclo[2.2.2]octan-1-yl)trifluoroborate  
128 MHz, Acetone- $d_6$

$^{11}\text{B}$  NMR

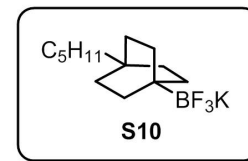

4.64

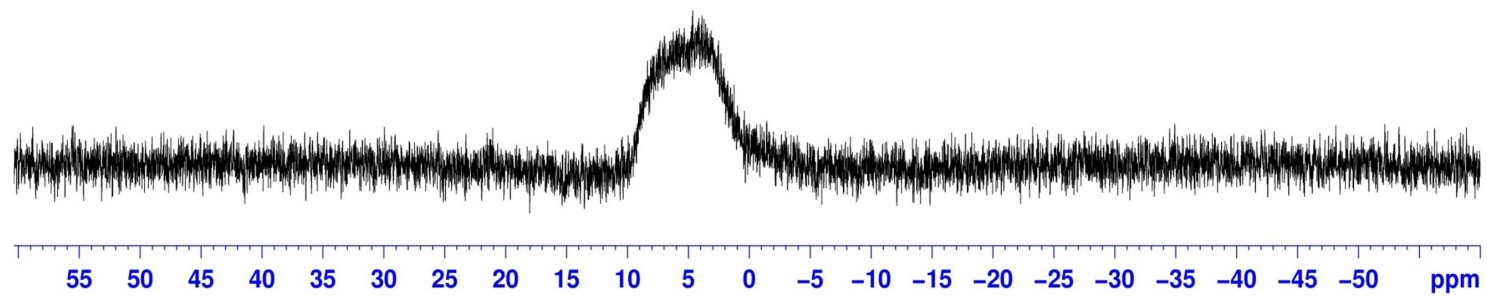

S124

Potassium (1-methylcyclohexyl)trifluoroborate  
500 MHz, Acetone- $d_6$

$^1\text{H}$  NMR

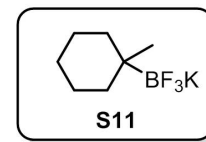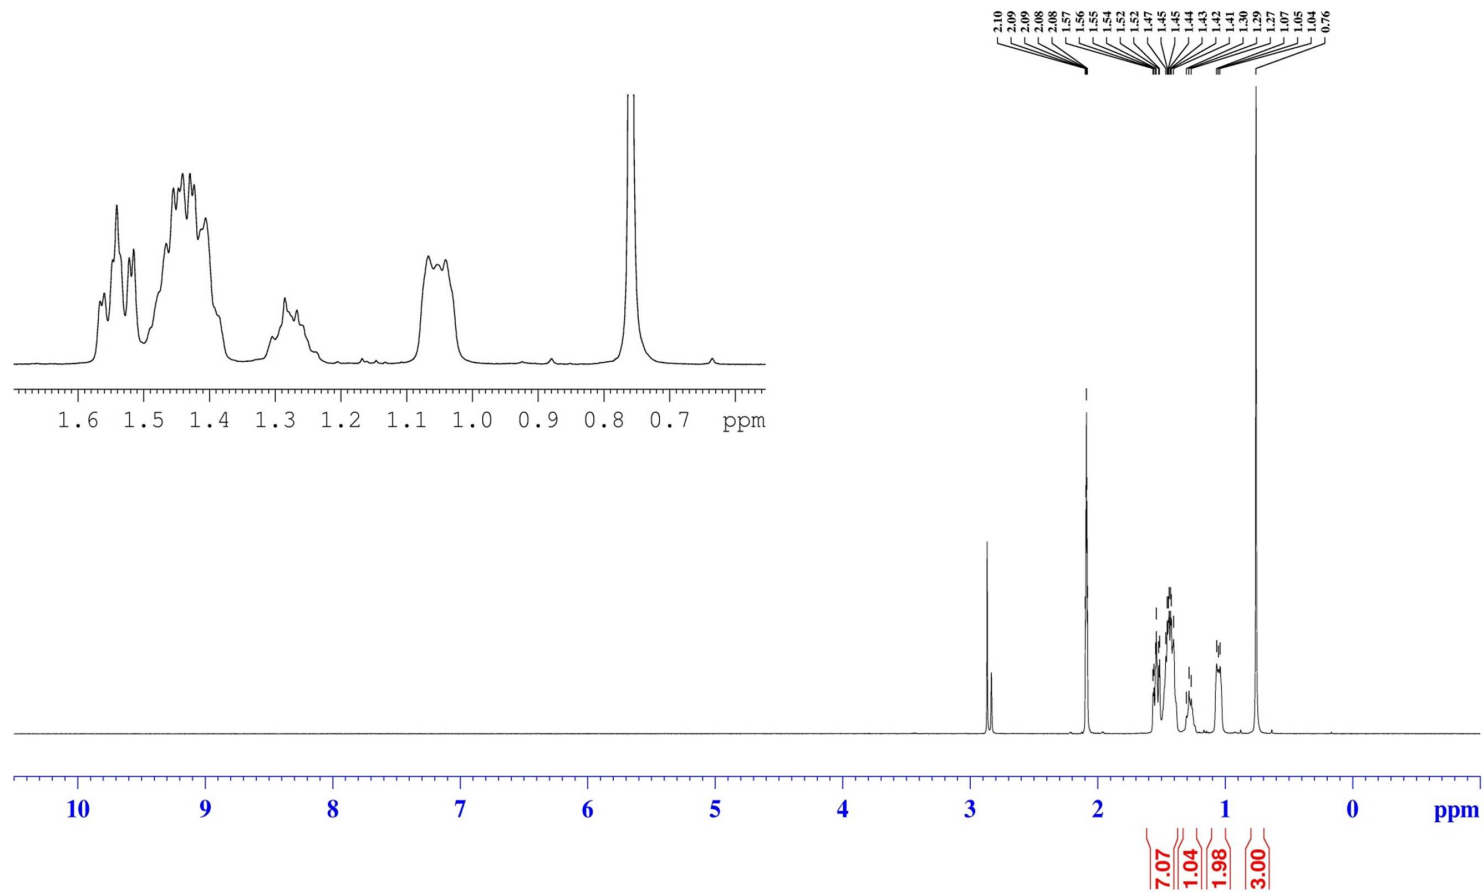

S125

<sup>13</sup>C NMR

Potassium (1-methylcyclohexyl)trifluoroborate  
125 MHz, Acetone-*d*<sub>6</sub>

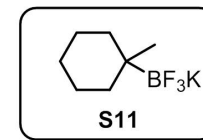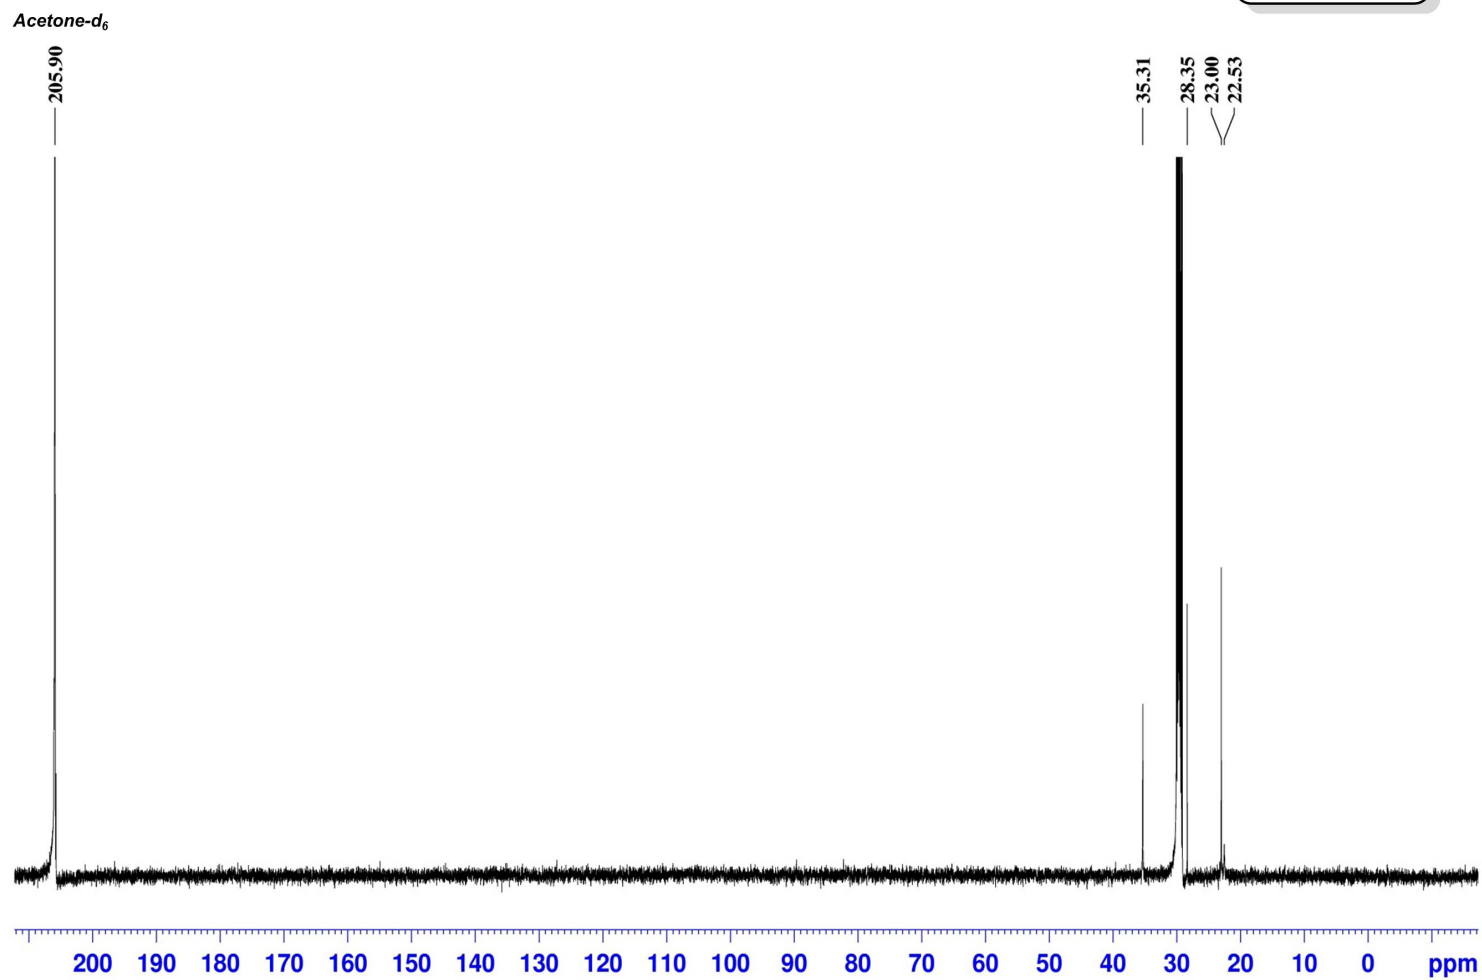

S126

Potassium (1-methylcyclohexyl)trifluoroborate  
471 MHz, Acetone- $d_6$

$^{19}\text{F}$  NMR

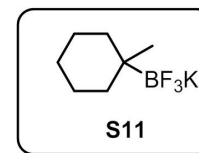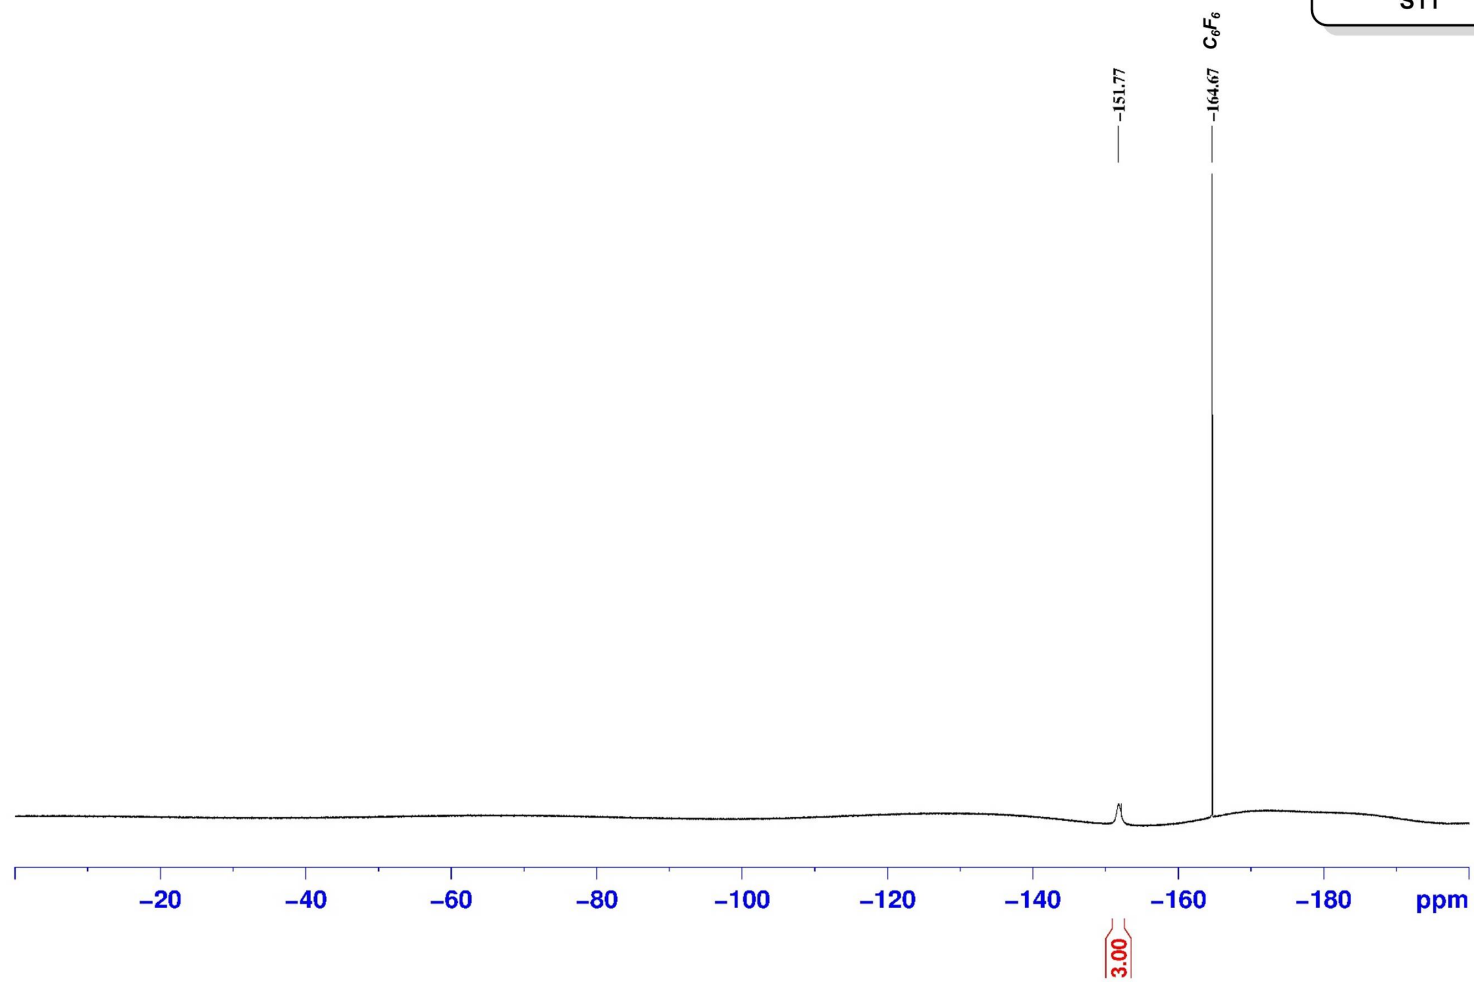

S127

Potassium (1-methylcyclohexyl)trifluoroborate  
128 MHz, Acetone-*d*<sub>6</sub>

<sup>11</sup>B NMR

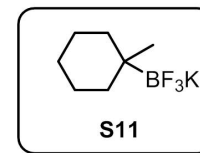

5.67  
5.18  
4.64  
4.18

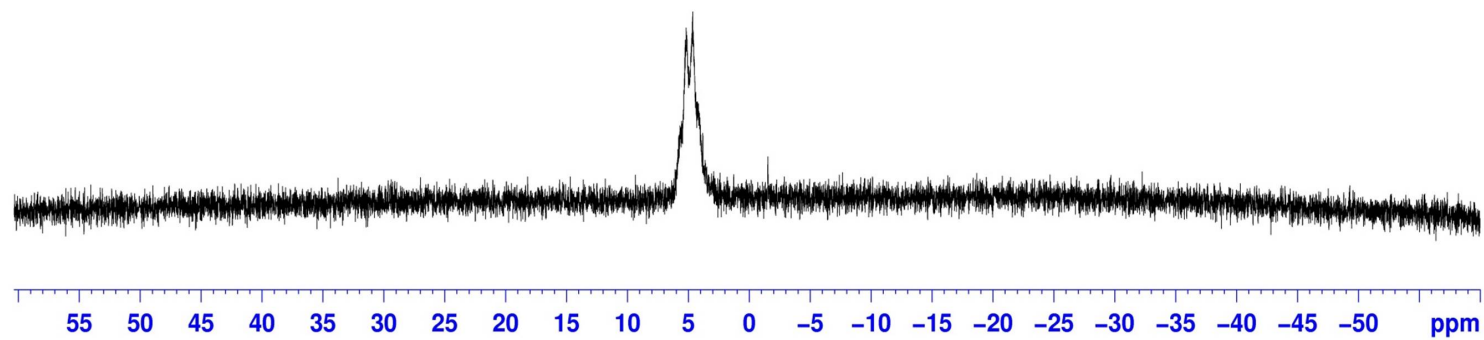

S128



Potassium (2'-oxo-[1,1'-bi(cyclopentan)]-1-yl) trifluoroborate  
500 MHz, Acetone-*d*<sub>6</sub>

<sup>1</sup>H NMR

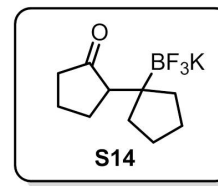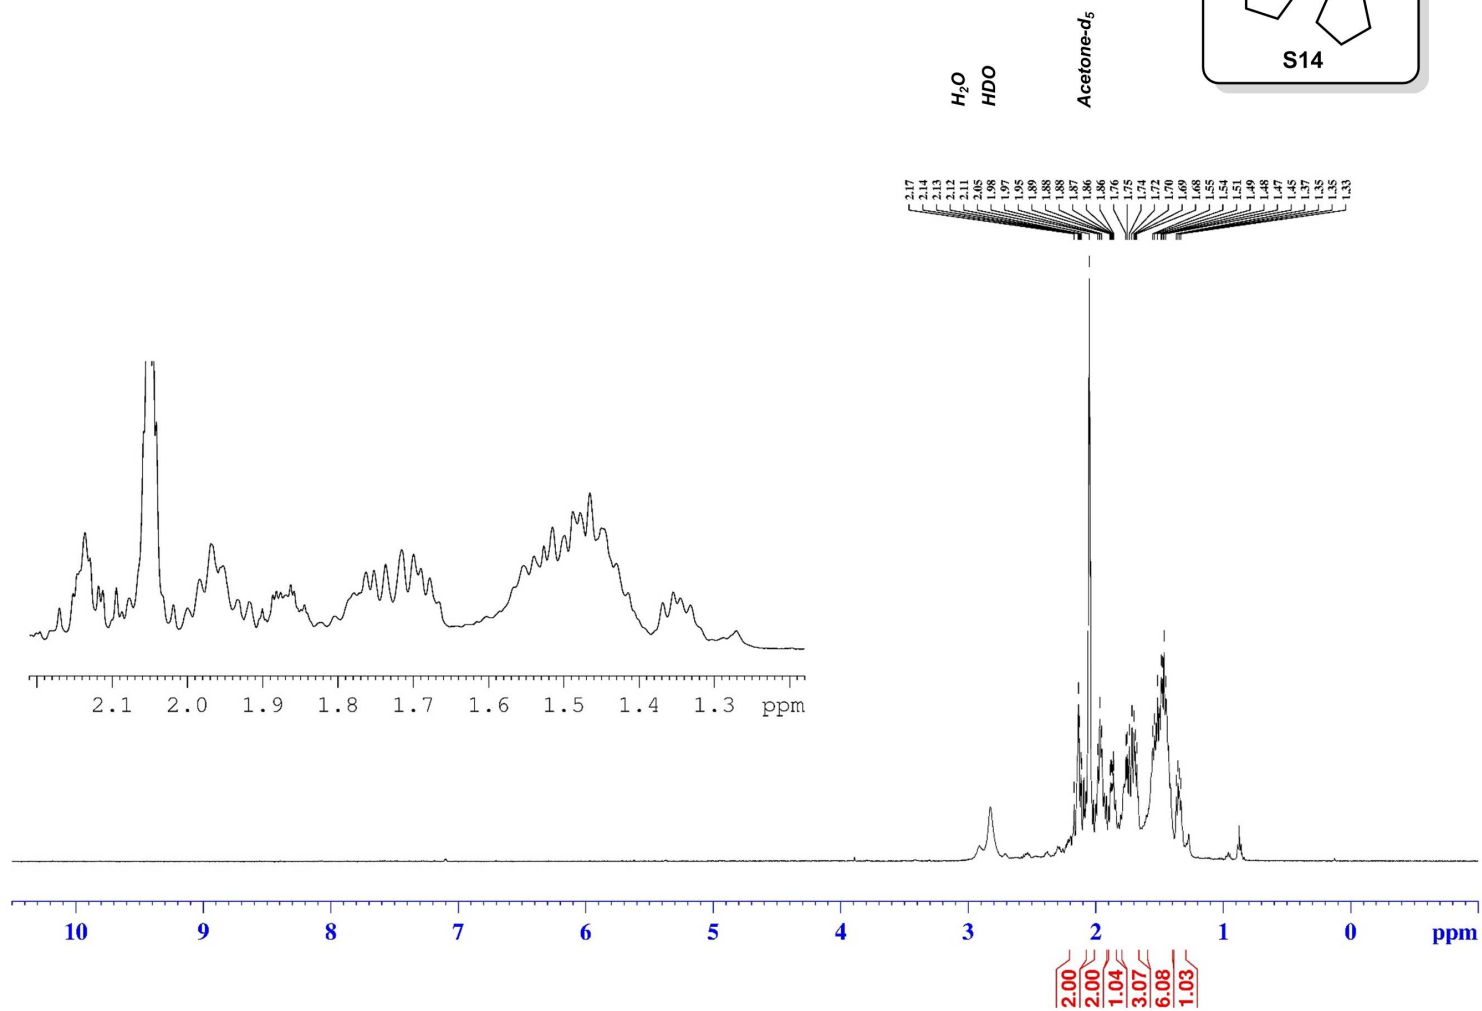

S129

Potassium (2'-oxo-[1,1'-bi(cyclopentan)]-1-yl) trifluoroborate  
125 MHz, Acetone- $d_6$

$^{13}\text{C}$  NMR

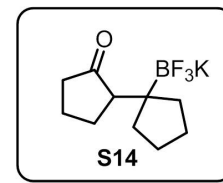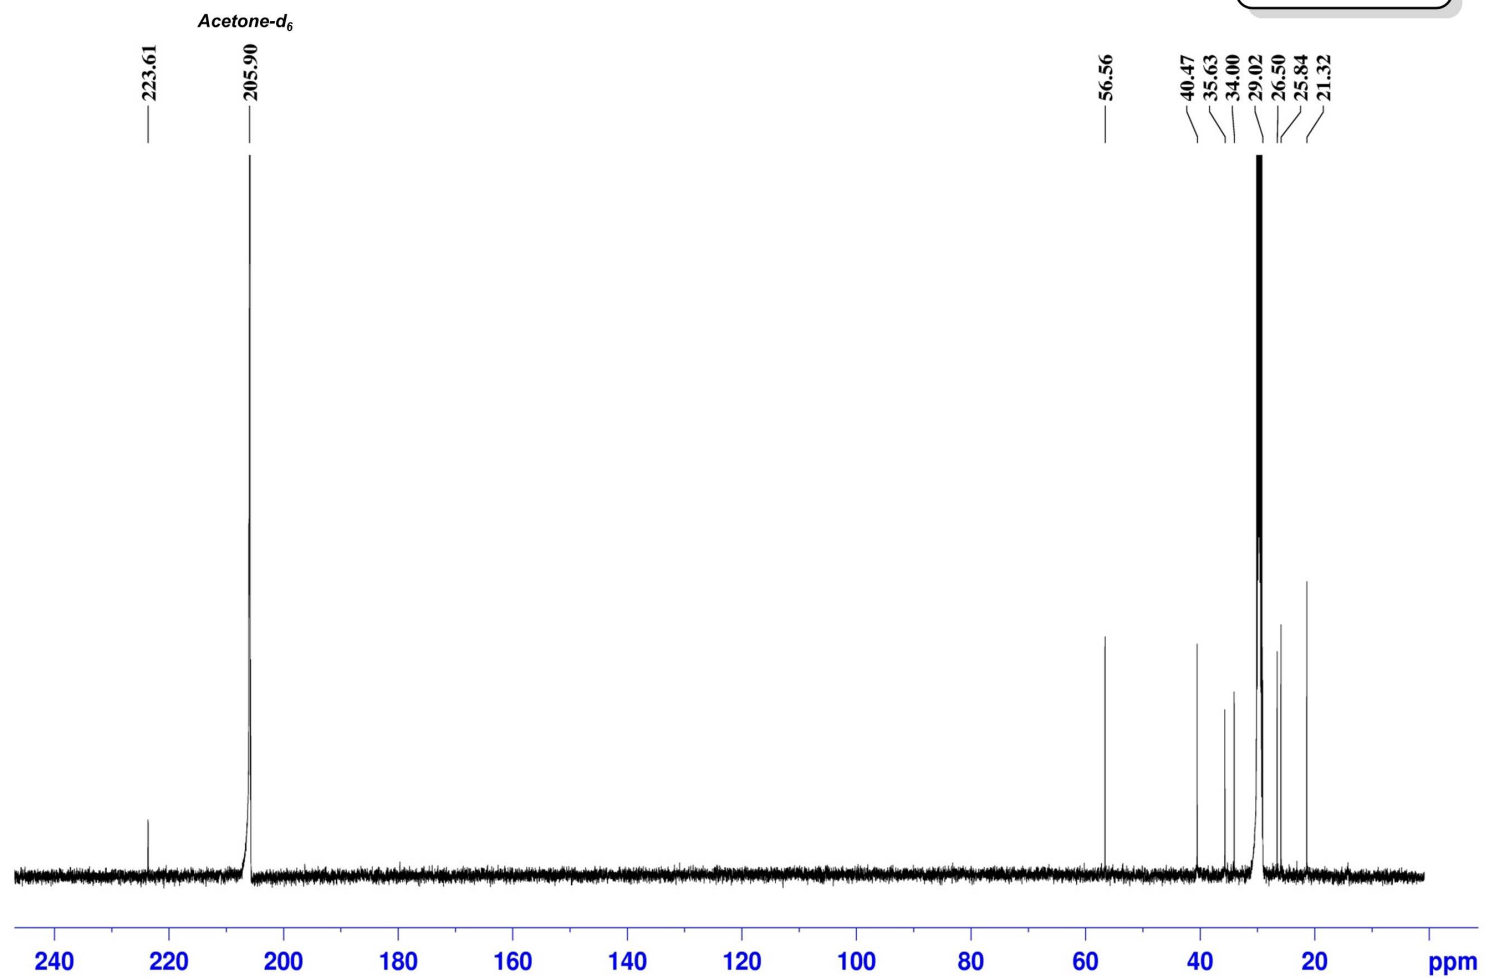

S130

Potassium (2'-oxo-[1,1'-bi(cyclopentan)]-1-yl) trifluoroborate  
471 MHz, Acetone- $d_6$

$^{19}\text{F}$  NMR

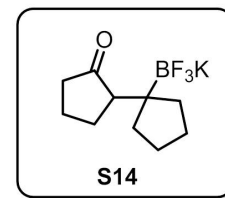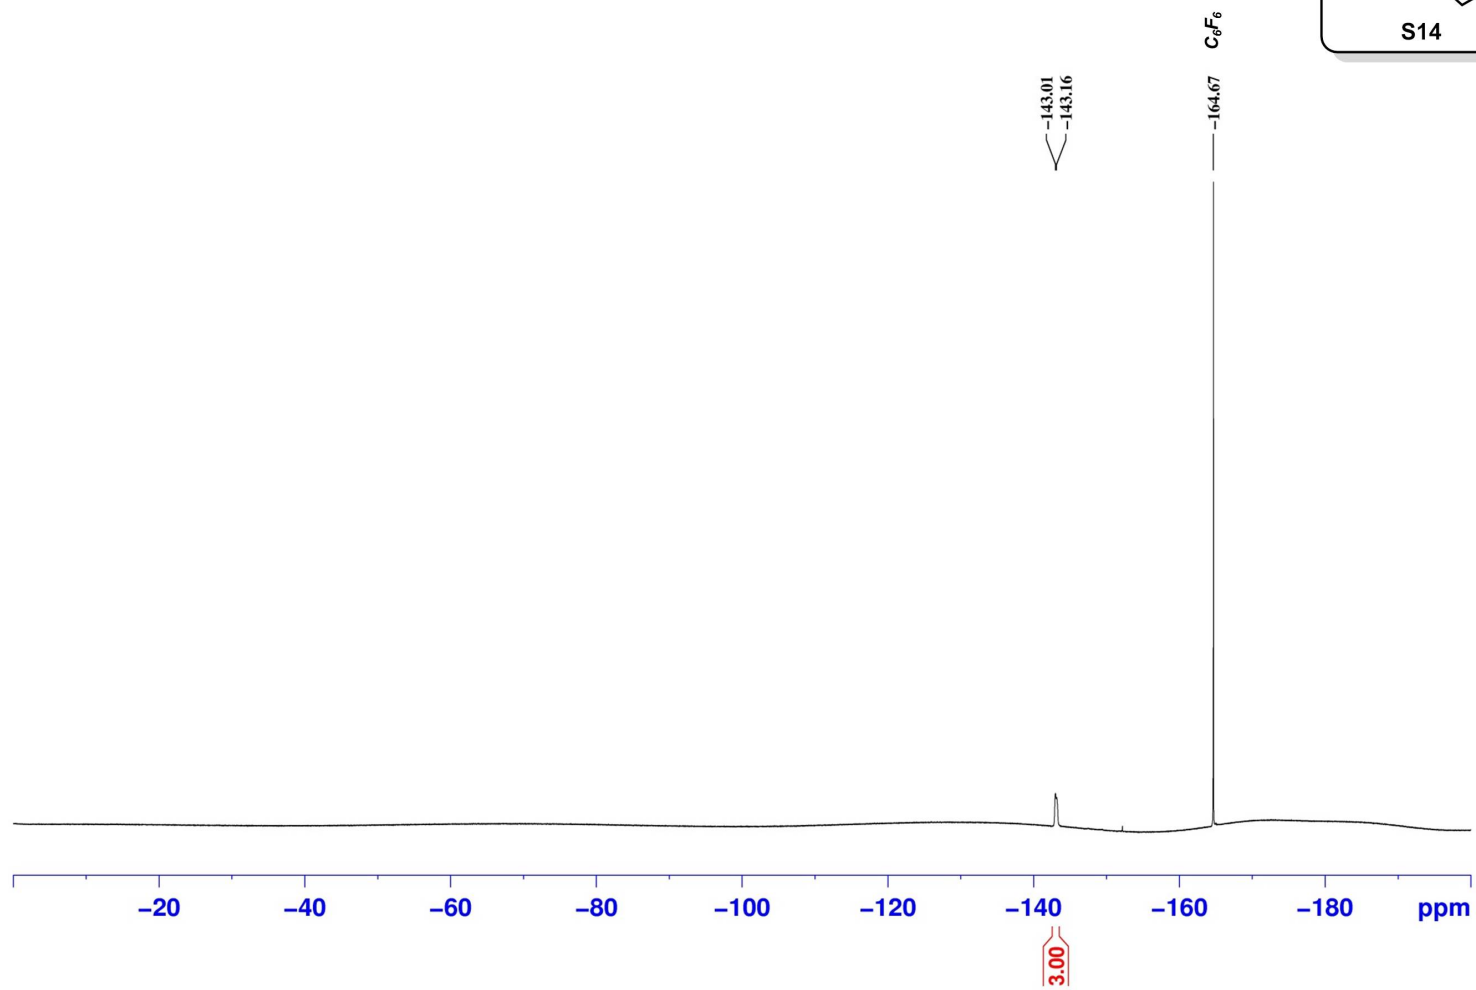

S131

Potassium (2'-oxo-[1,1'-bi(cyclopentan)]-1-yl) trifluoroborate  
128 MHz, Acetone- $d_6$

$^{11}\text{B}$  NMR

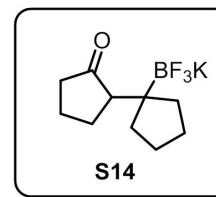

4.43

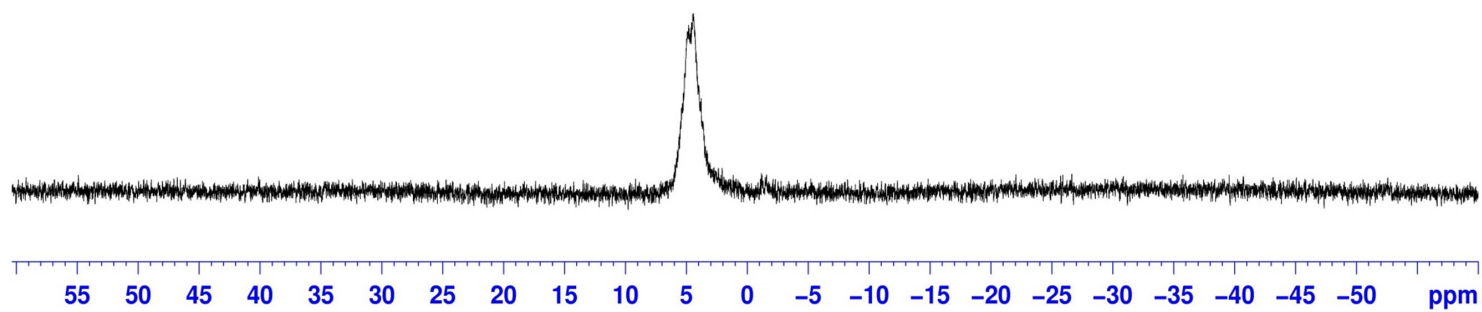

S132

# <sup>1</sup>H NMR

Potassium (2,6,6-trimethyl-4-oxobicyclo[3.1.1]heptan-2-yl)trifluoroborate  
500 MHz, Acetone-d<sub>6</sub>

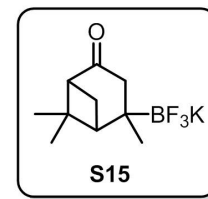

H<sub>2</sub>O  
HDO  
Acetone-d<sub>6</sub>

2.78  
2.74  
2.28  
2.27  
2.25  
2.24  
2.23  
2.17  
2.15  
2.12  
2.10  
2.09  
2.08  
2.04  
1.85  
1.82  
1.50  
1.03  
0.99

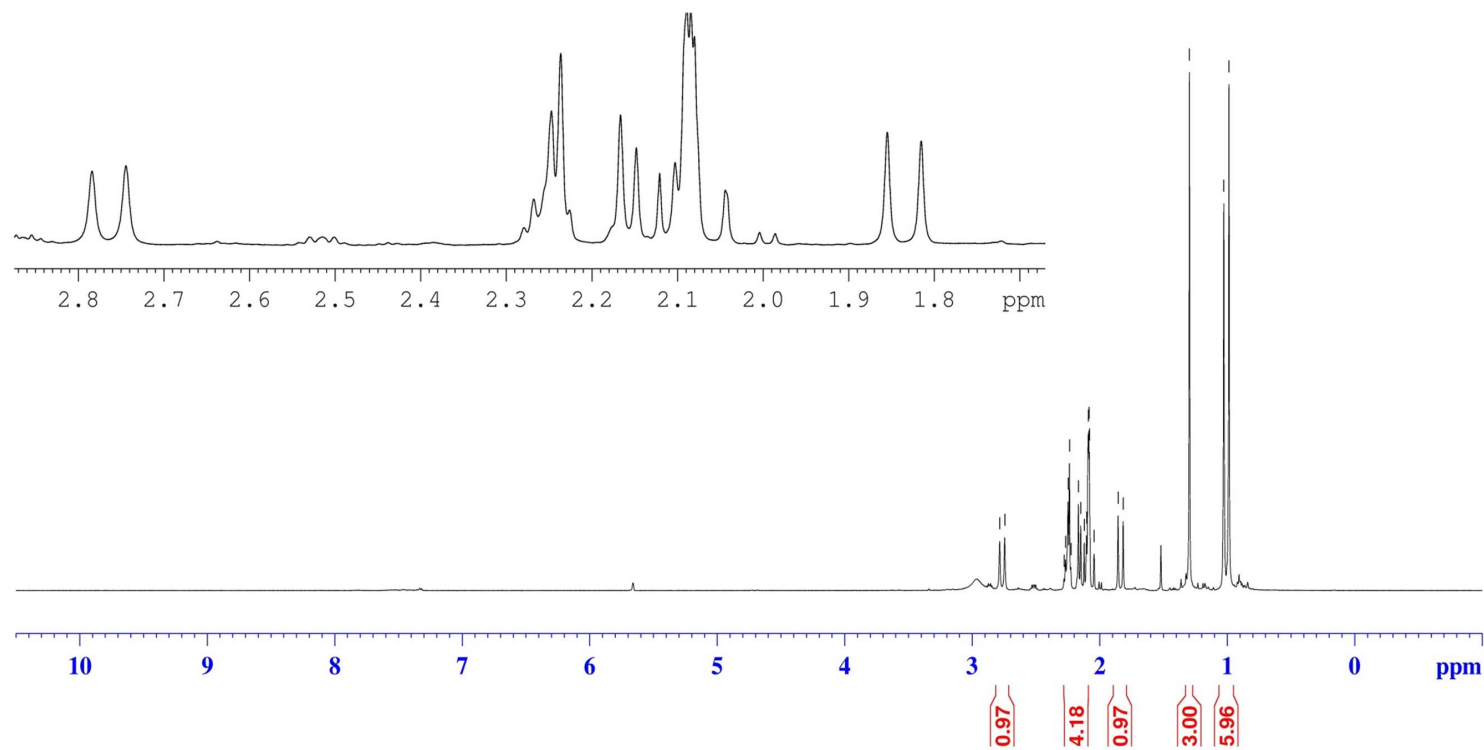

S133

<sup>13</sup>C NMR

Potassium (2,6,6-trimethyl-4-oxobicyclo[3.1.1]heptan-2-yl)trifluoroborate  
125 MHz, Acetone-d<sub>6</sub>

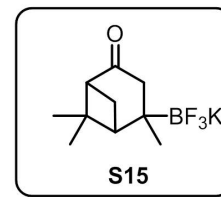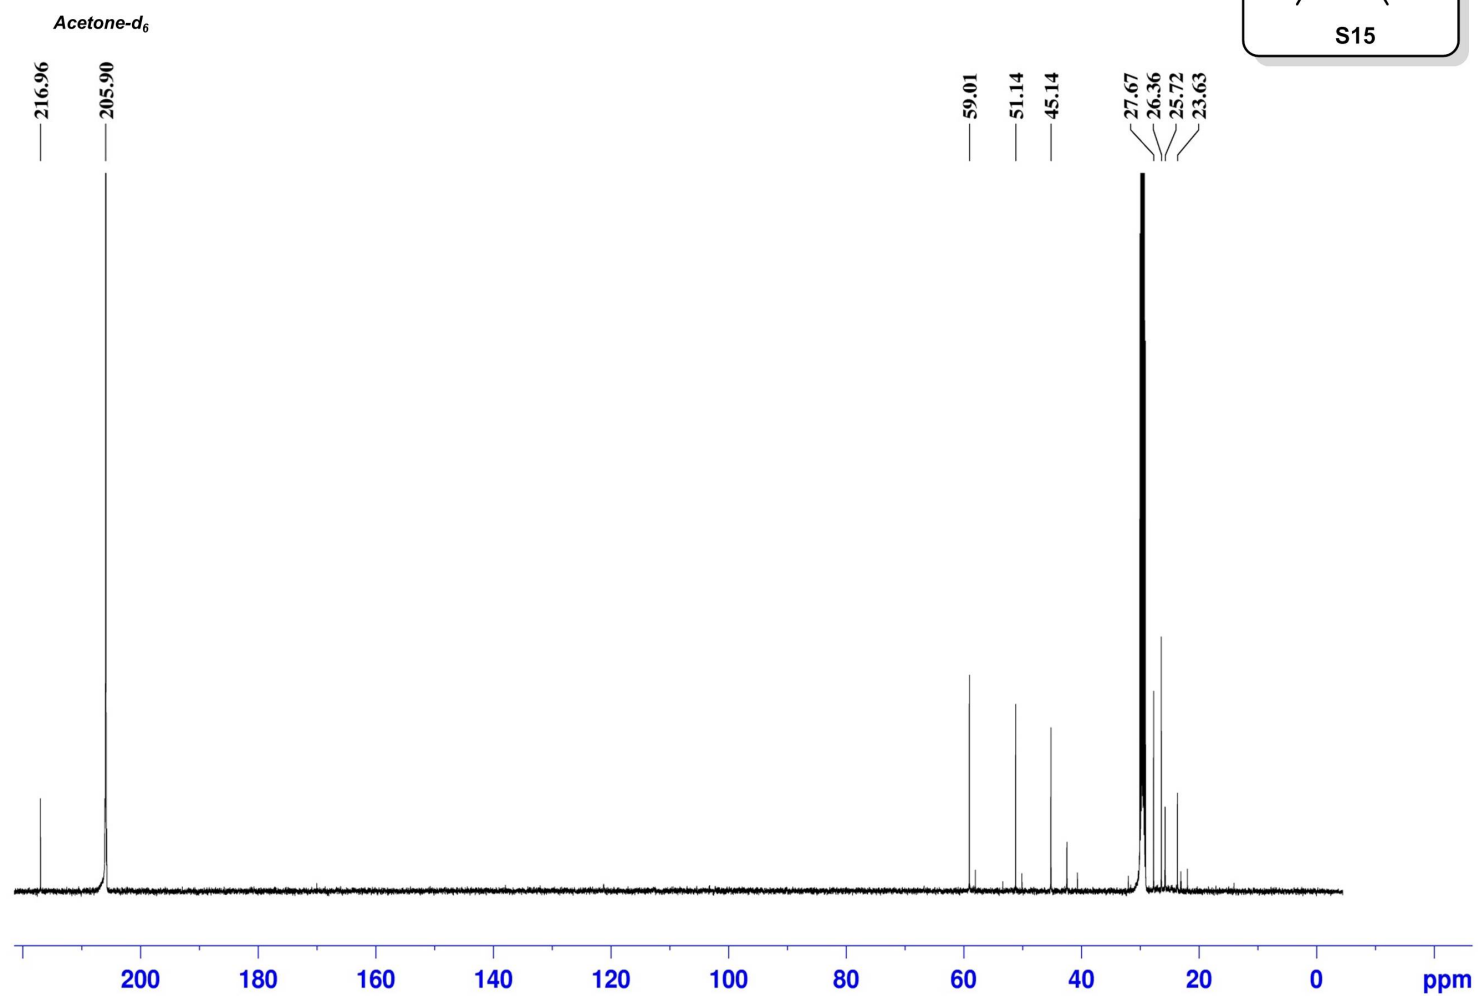

S134

Potassium (2,6,6-trimethyl-4-oxobicyclo[3.1.1]heptan-2-yl)trifluoroborate  
471 MHz, Acetone- $d_6$

$^{19}\text{F}$  NMR

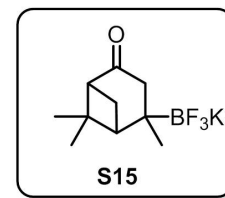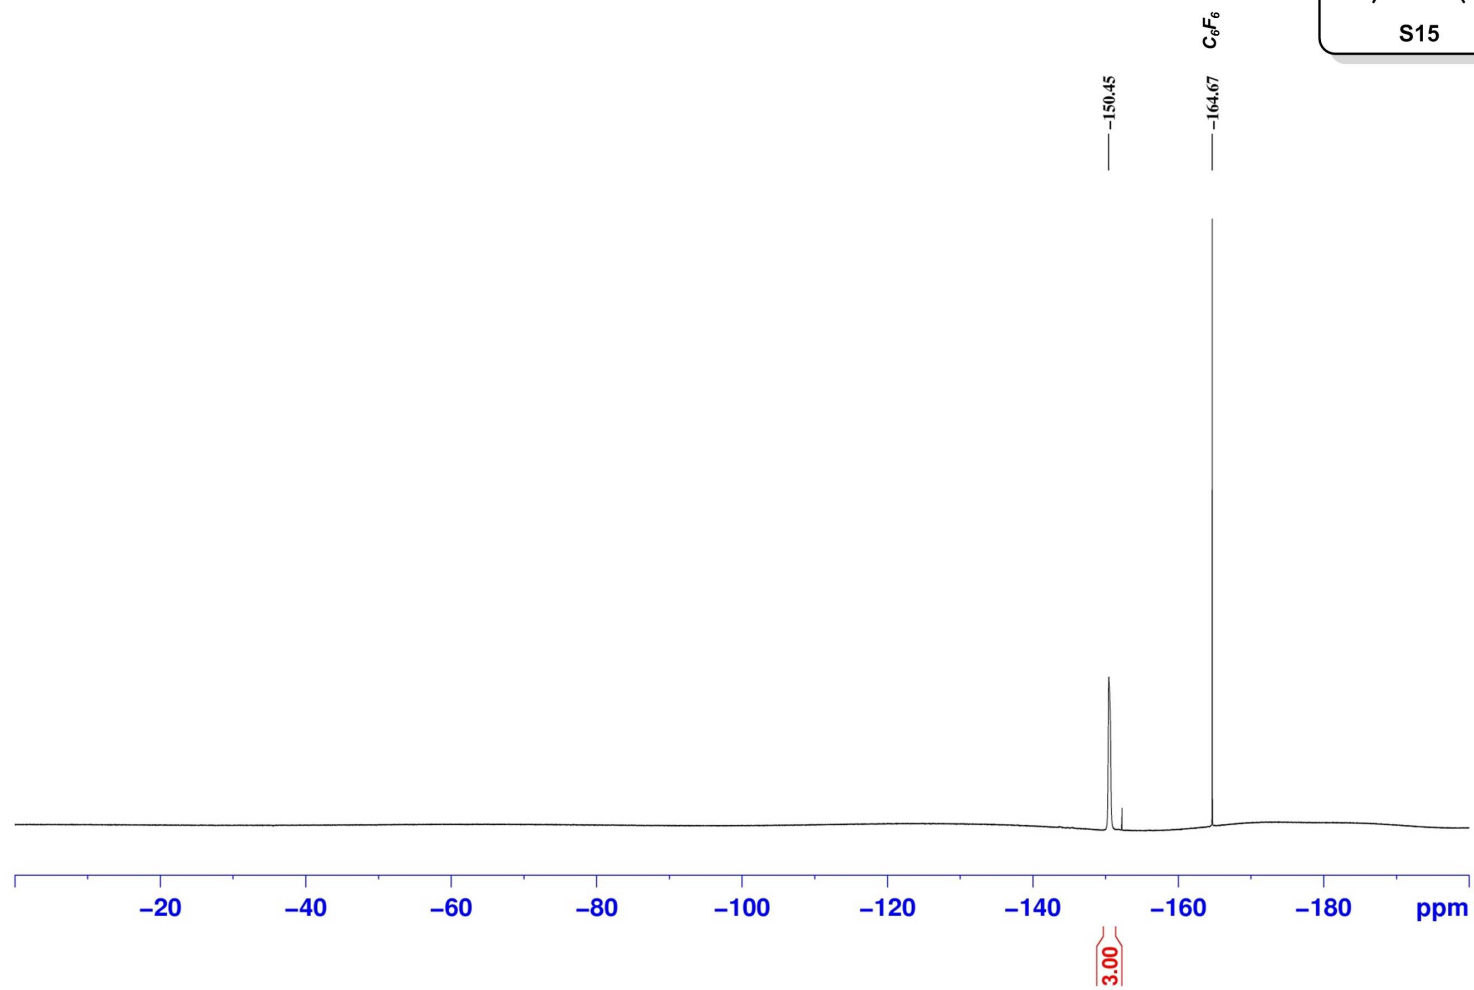

S135

Potassium (2,6,6-trimethyl-4-oxobicyclo[3.1.1]heptan-2-yl)trifluoroborate  
128 MHz, Acetone- $d_6$

$^{11}\text{B}$  NMR

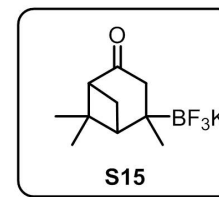

5.48

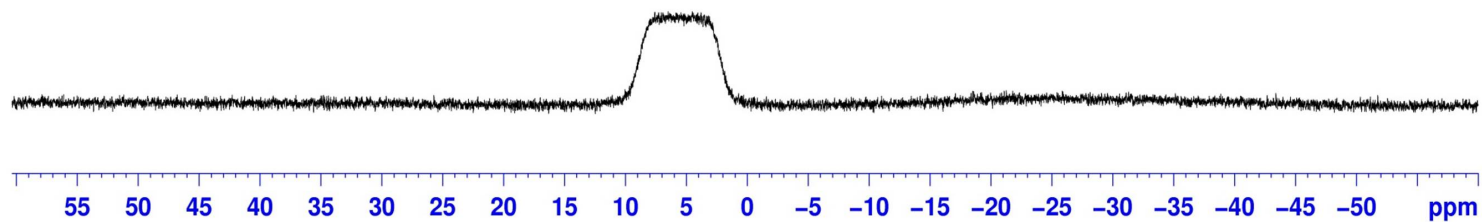

S136



Potassium (1,3-dimethyl-5-oxocyclohexyl)trifluoroborate  
500 MHz, Acetone-*d*<sub>6</sub>

**<sup>1</sup>H NMR**

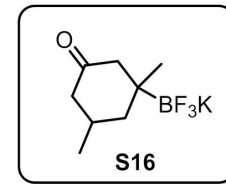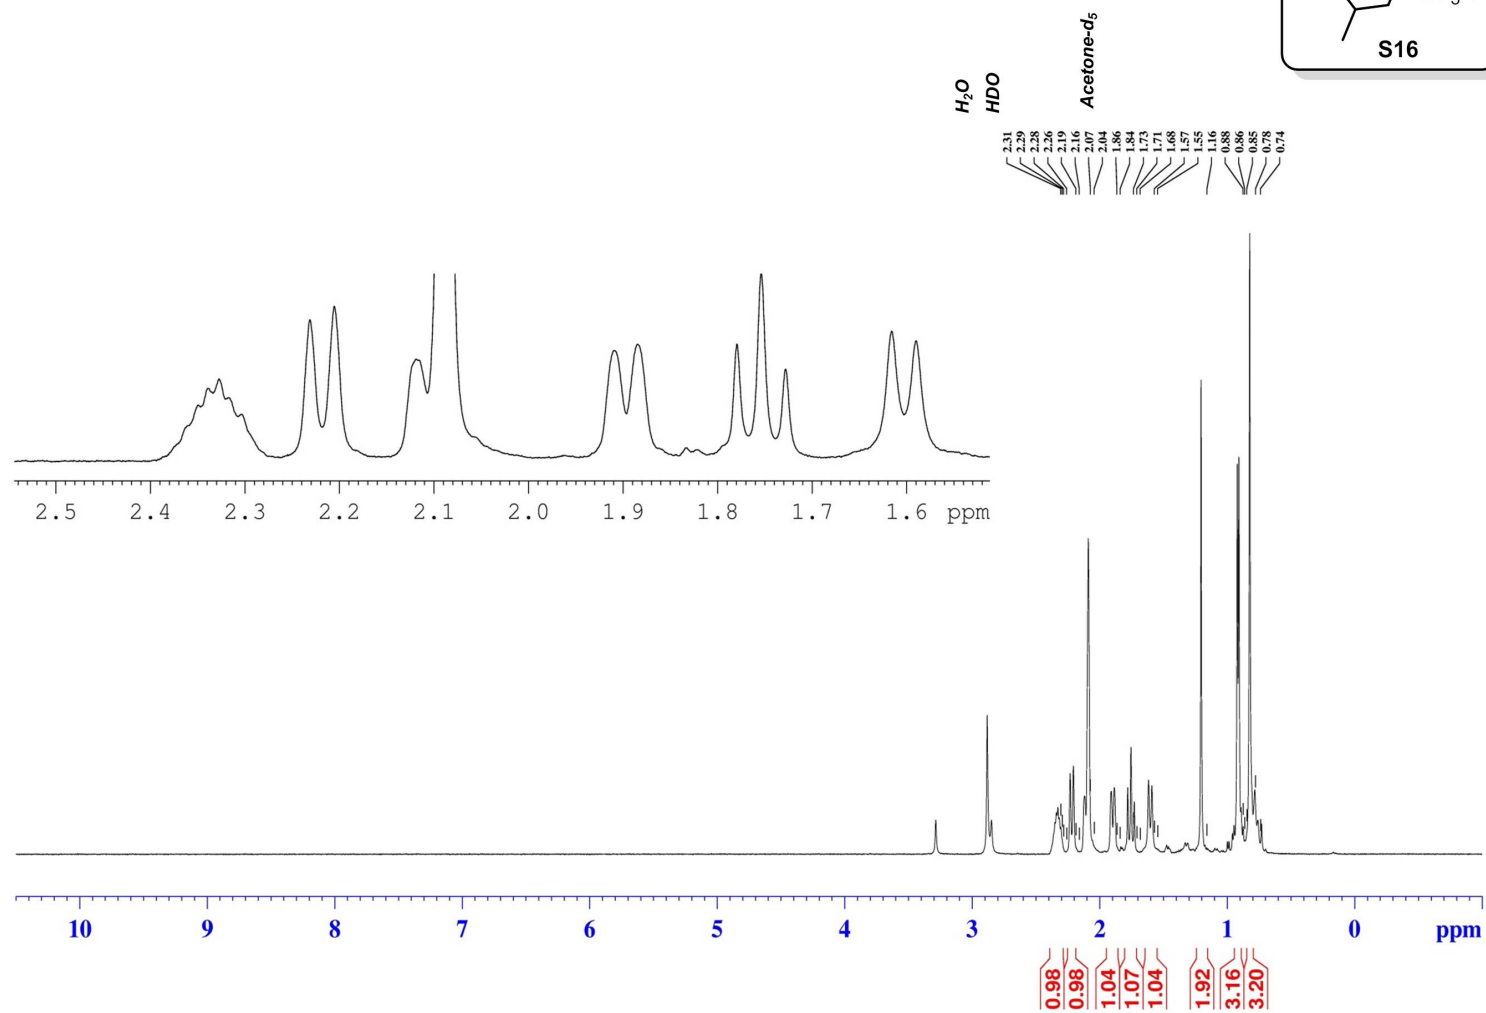

**S137**

<sup>13</sup>C NMR

Potassium (1,3-dimethyl-5-oxocyclohexyl)trifluoroborate  
125 MHz, Acetone-d<sub>6</sub>

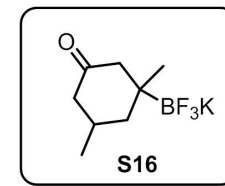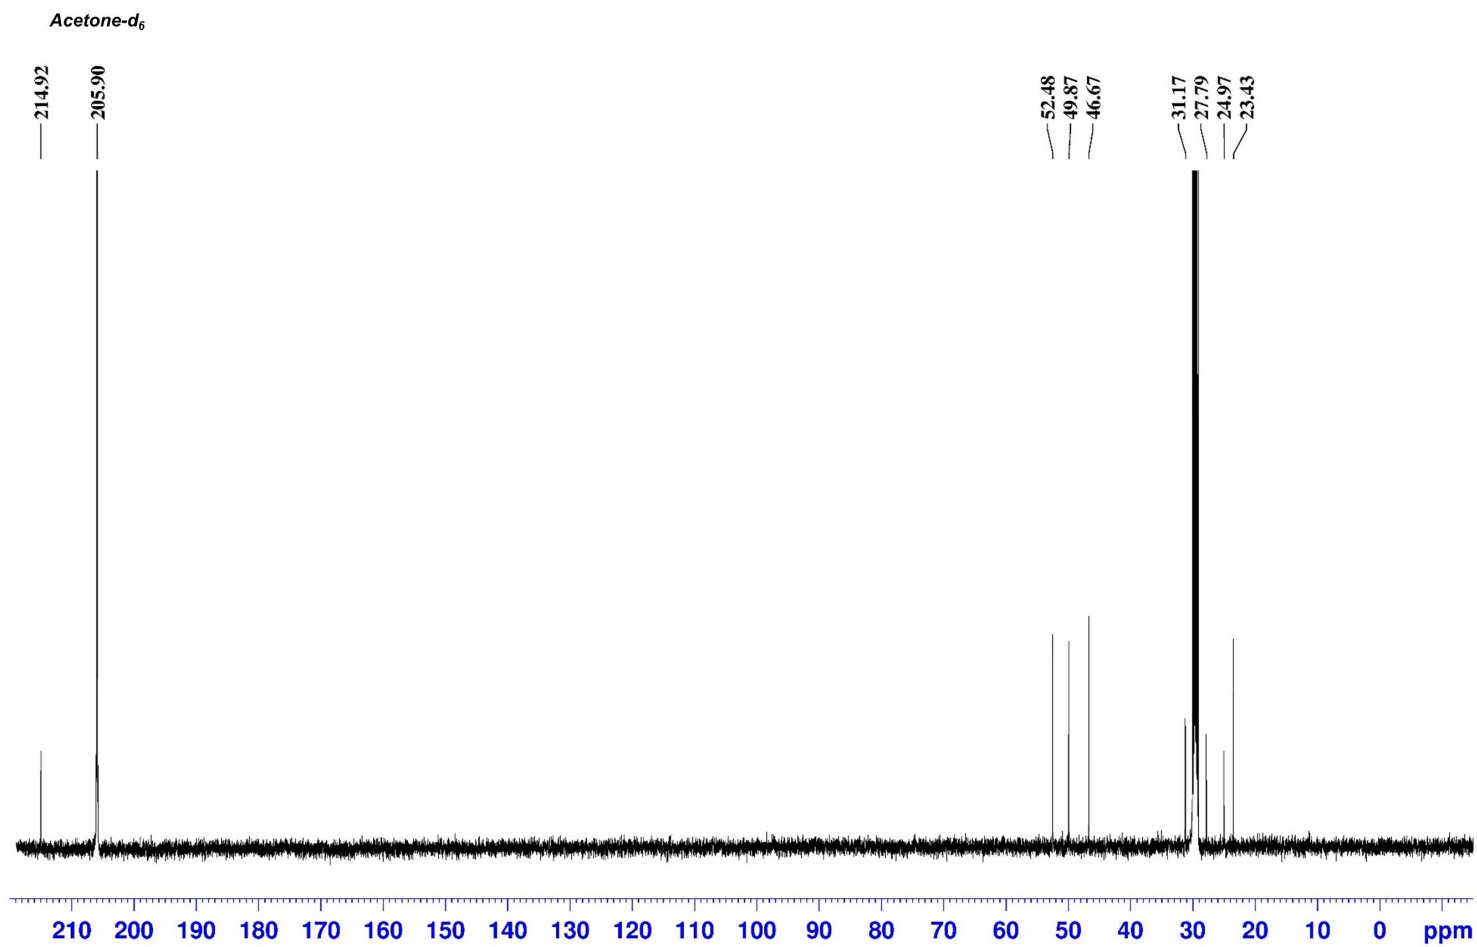

S138

Potassium (1,3-dimethyl-5-oxocyclohexyl)trifluoroborate  
471 MHz, Acetone- $d_6$

$^{19}\text{F}$  NMR

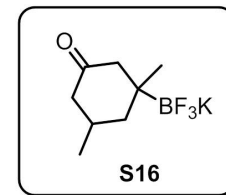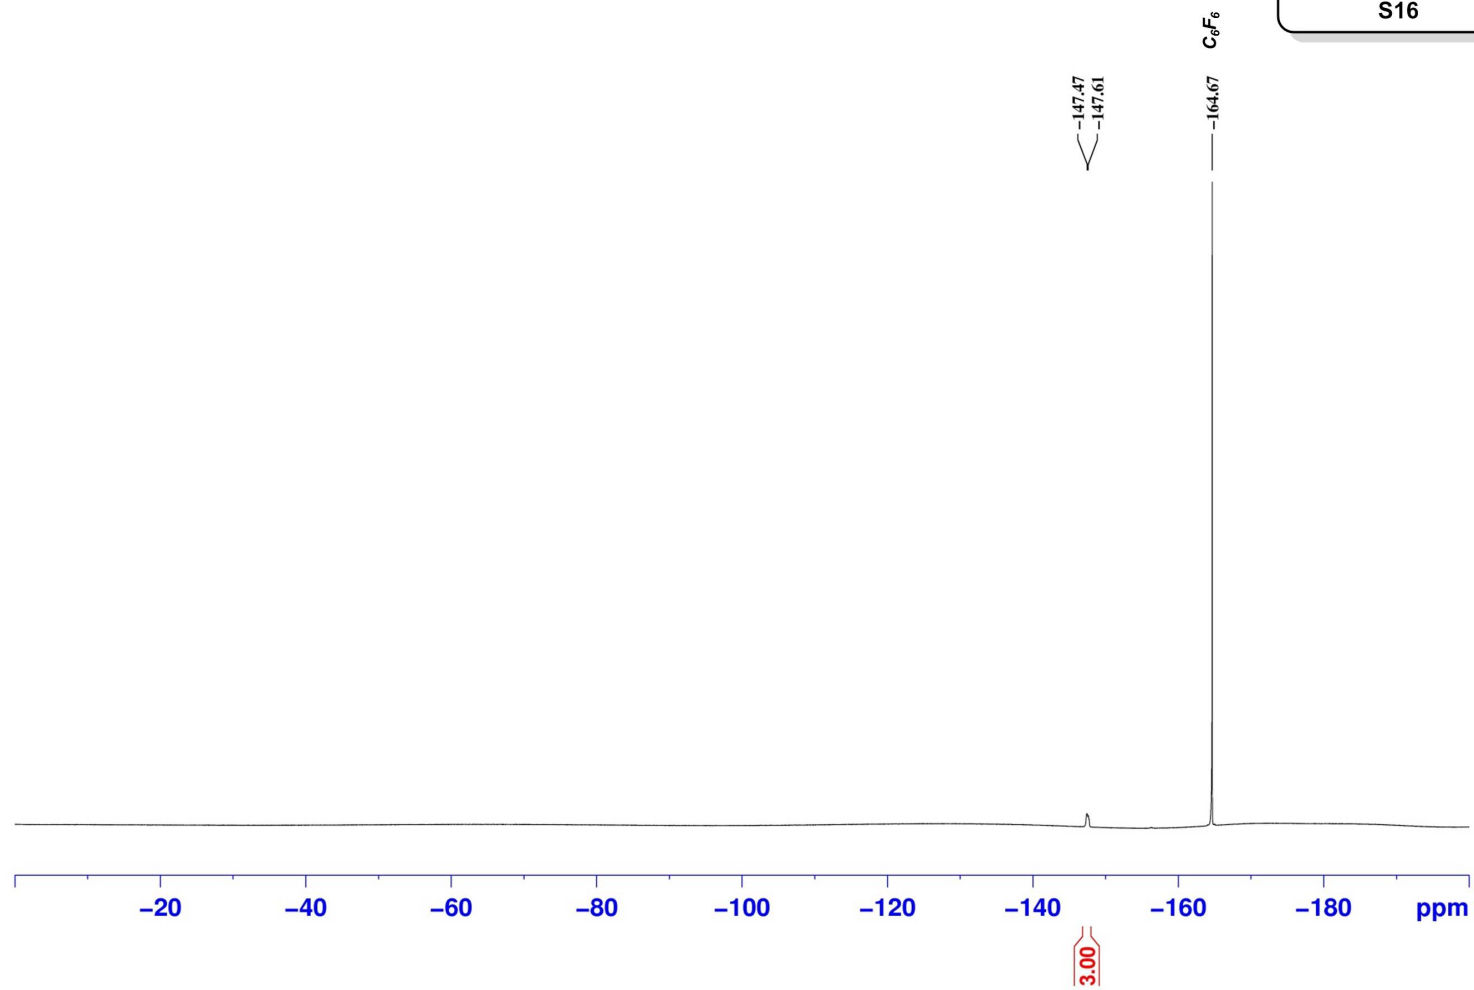

S139

Potassium (1,3-dimethyl-5-oxocyclohexyl)trifluoroborate  
128 MHz, Acetone- $d_6$

$^{11}\text{B}$  NMR

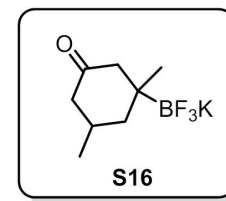

5.80  
5.30  
4.87  
4.40

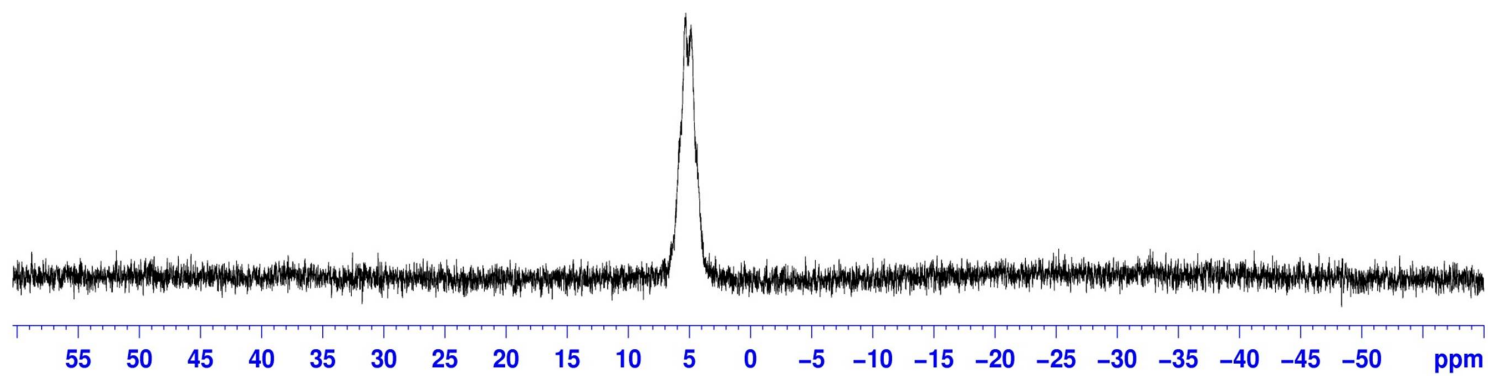

S140

Potassium (1,3-dimethyl-5-oxocyclohexyl)trifluoroborate  
500 MHz, Acetone- $d_6$

$^1\text{H}$  NMR

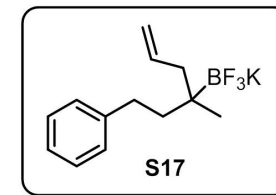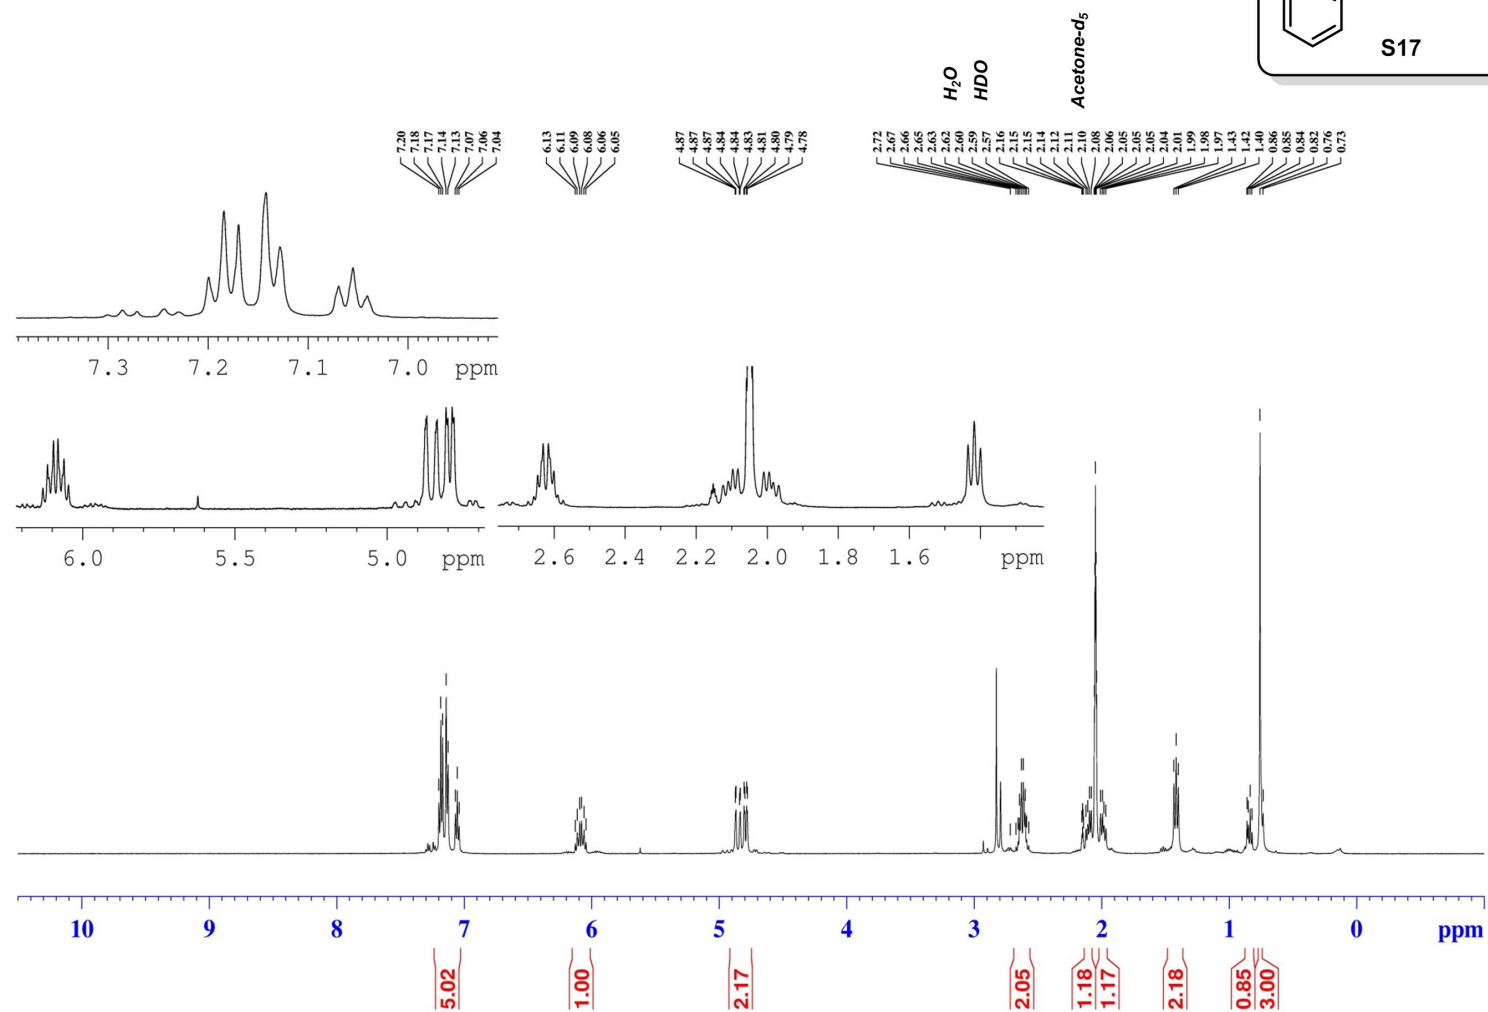

S141

Potassium (1,3-dimethyl-5-oxocyclohexyl)trifluoroborate  
125 MHz, Acetone- $d_6$

$^{13}\text{C}$  NMR

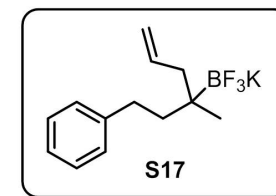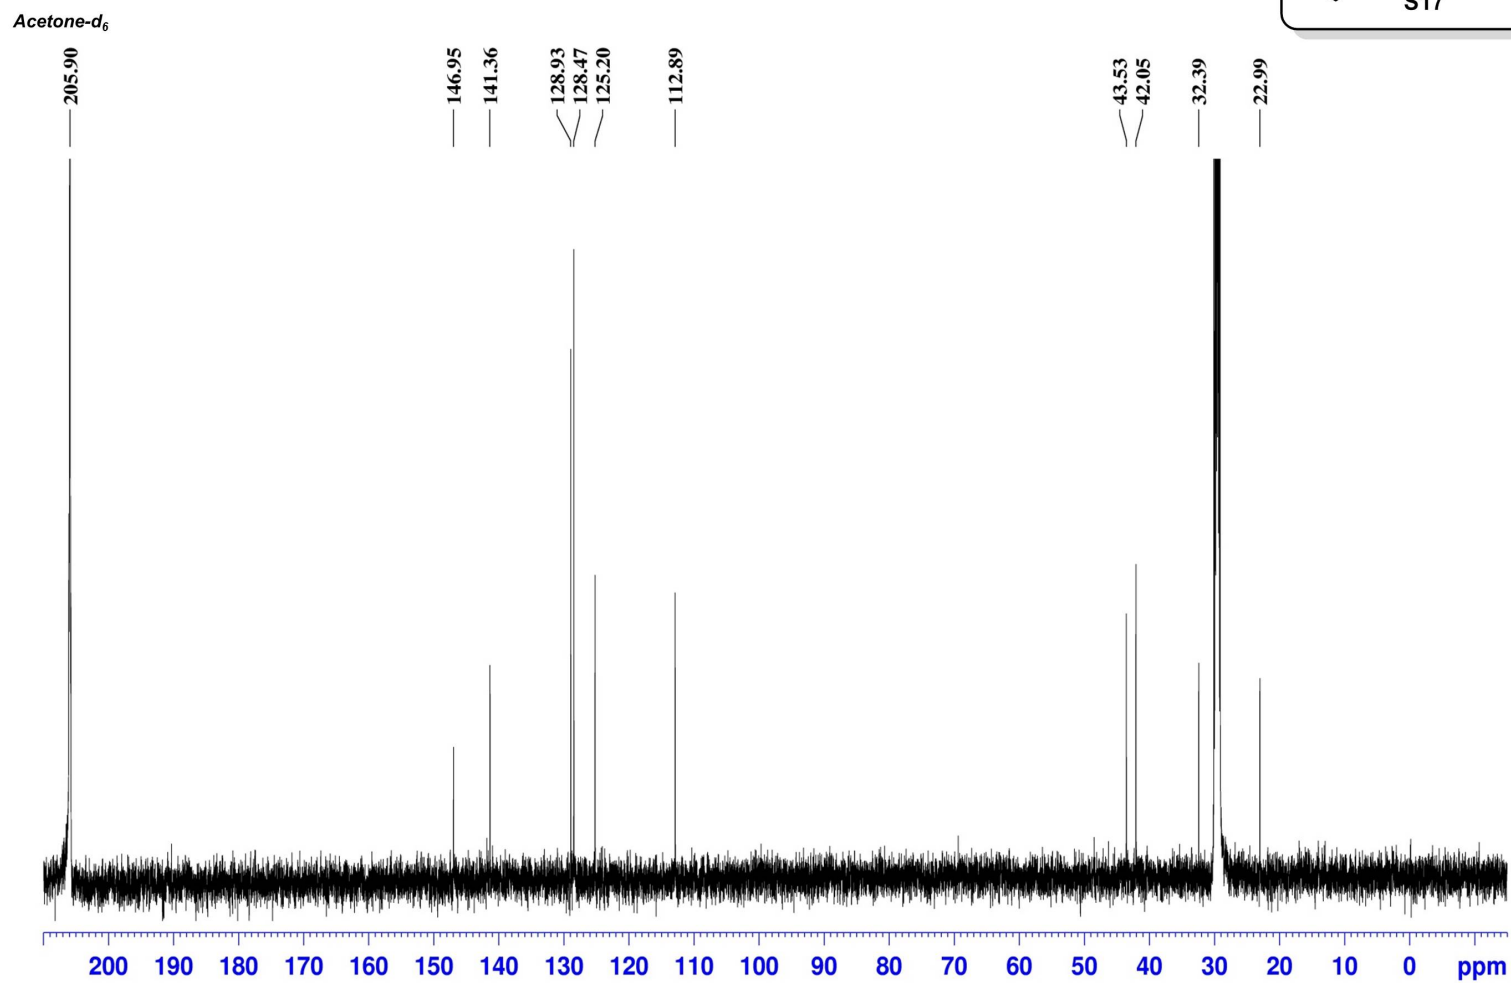

S142

Potassium (1,3-dimethyl-5-oxocyclohexyl)trifluoroborate  
471 MHz, Acetone- $d_6$

$^{19}\text{F}$  NMR

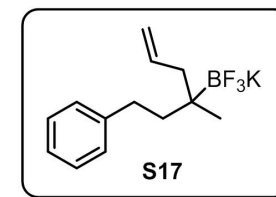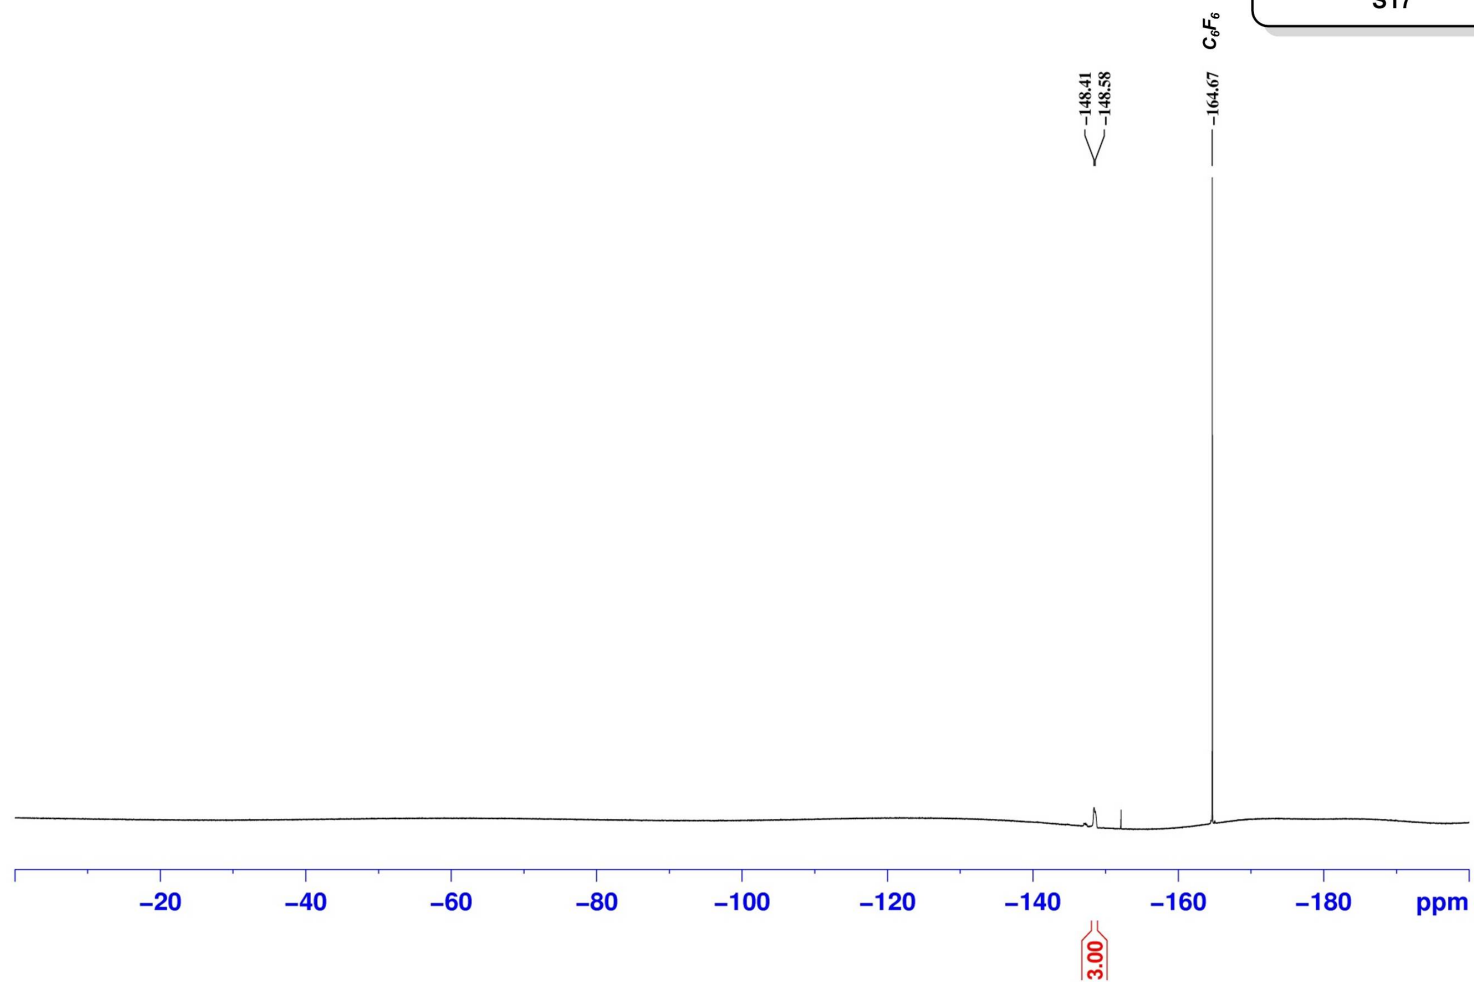

S143

Potassium (1,3-dimethyl-5-oxocyclohexyl)trifluoroborate  
128 MHz, Acetone-*d*<sub>6</sub>

<sup>11</sup>B NMR

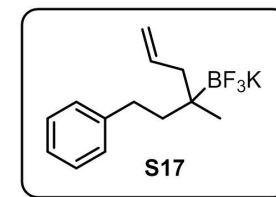

10.69  
10.16  
9.76  
8.99

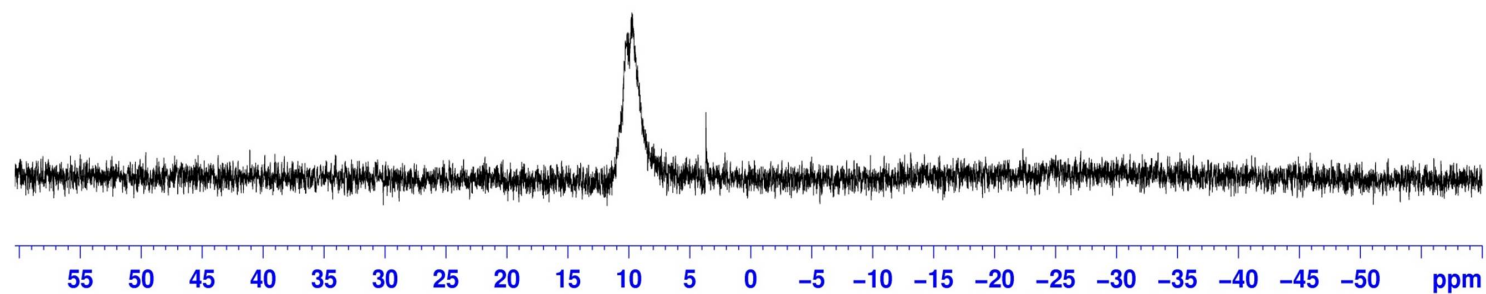

S144



Pent-4-en-1-yl acrylate  
500 MHz, CDCl<sub>3</sub>

<sup>1</sup>H NMR

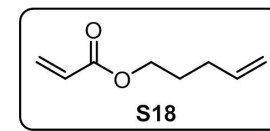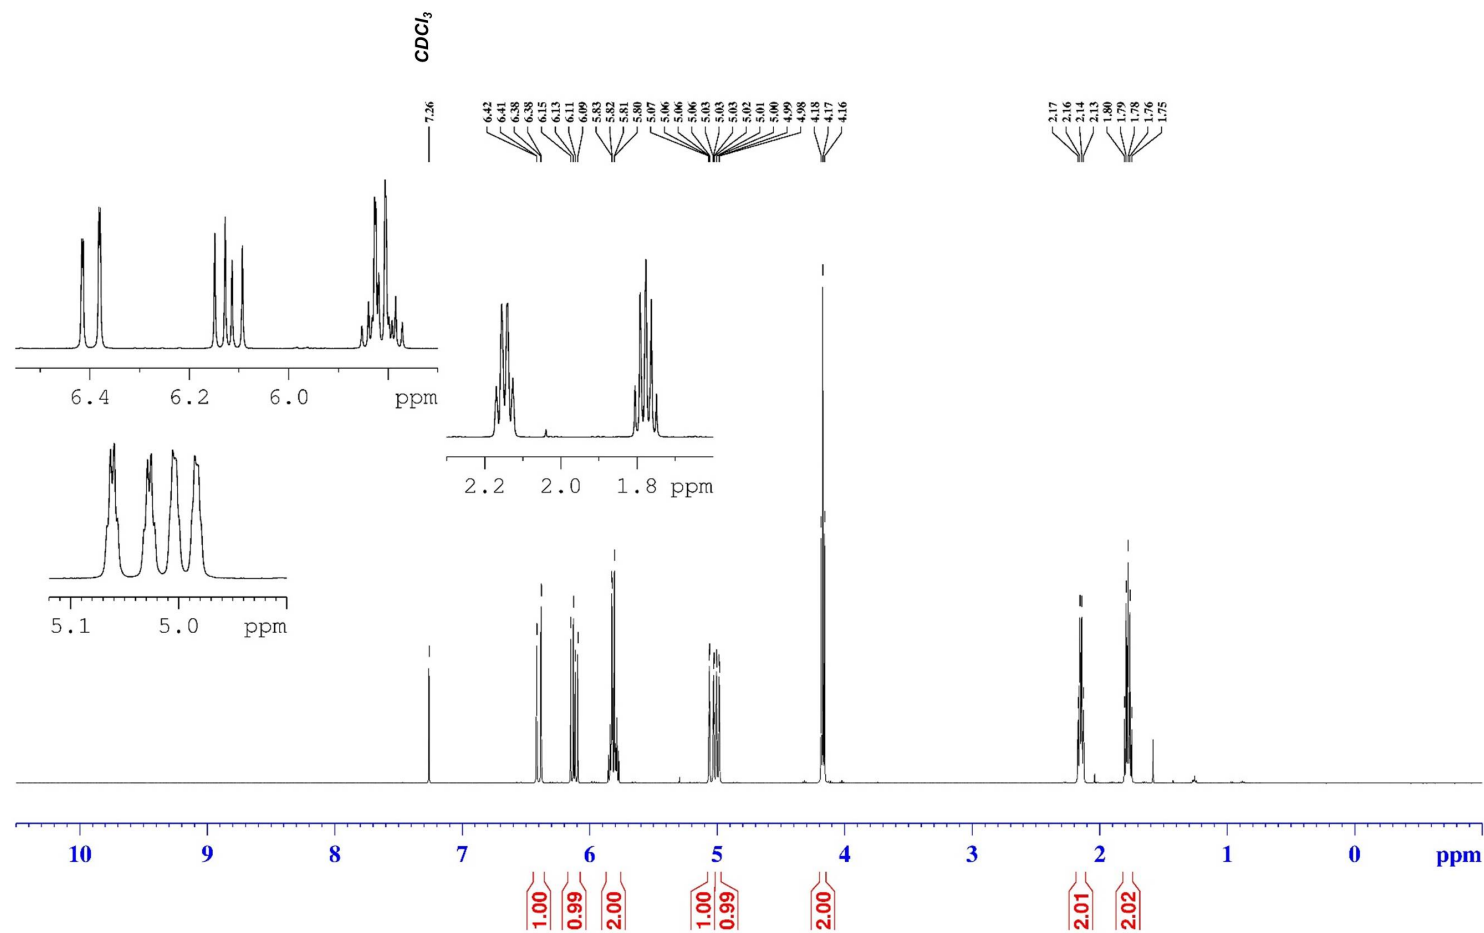

S145

Pent-4-en-1-yl acrylate  
125 MHz, CDCl<sub>3</sub>

<sup>1</sup>H NMR

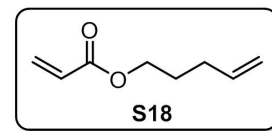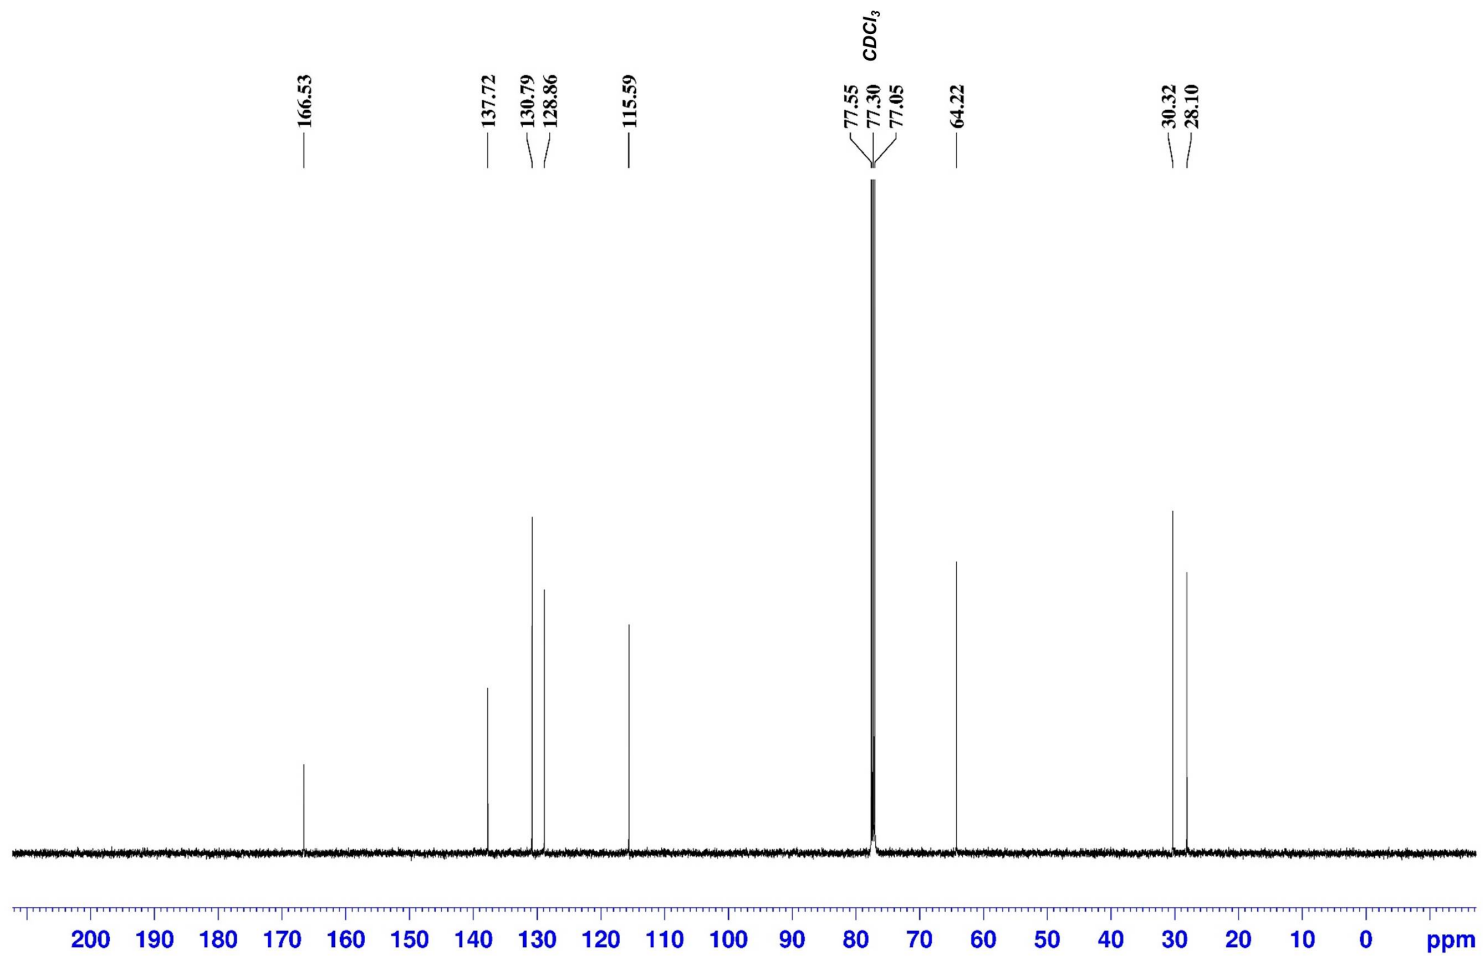

(S)-(4-(prop-1-en-2-yl)cyclohex-1-en-1-yl)methyl acrylate  
500 MHz, CDCl<sub>3</sub>

<sup>1</sup>H NMR

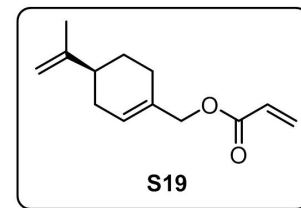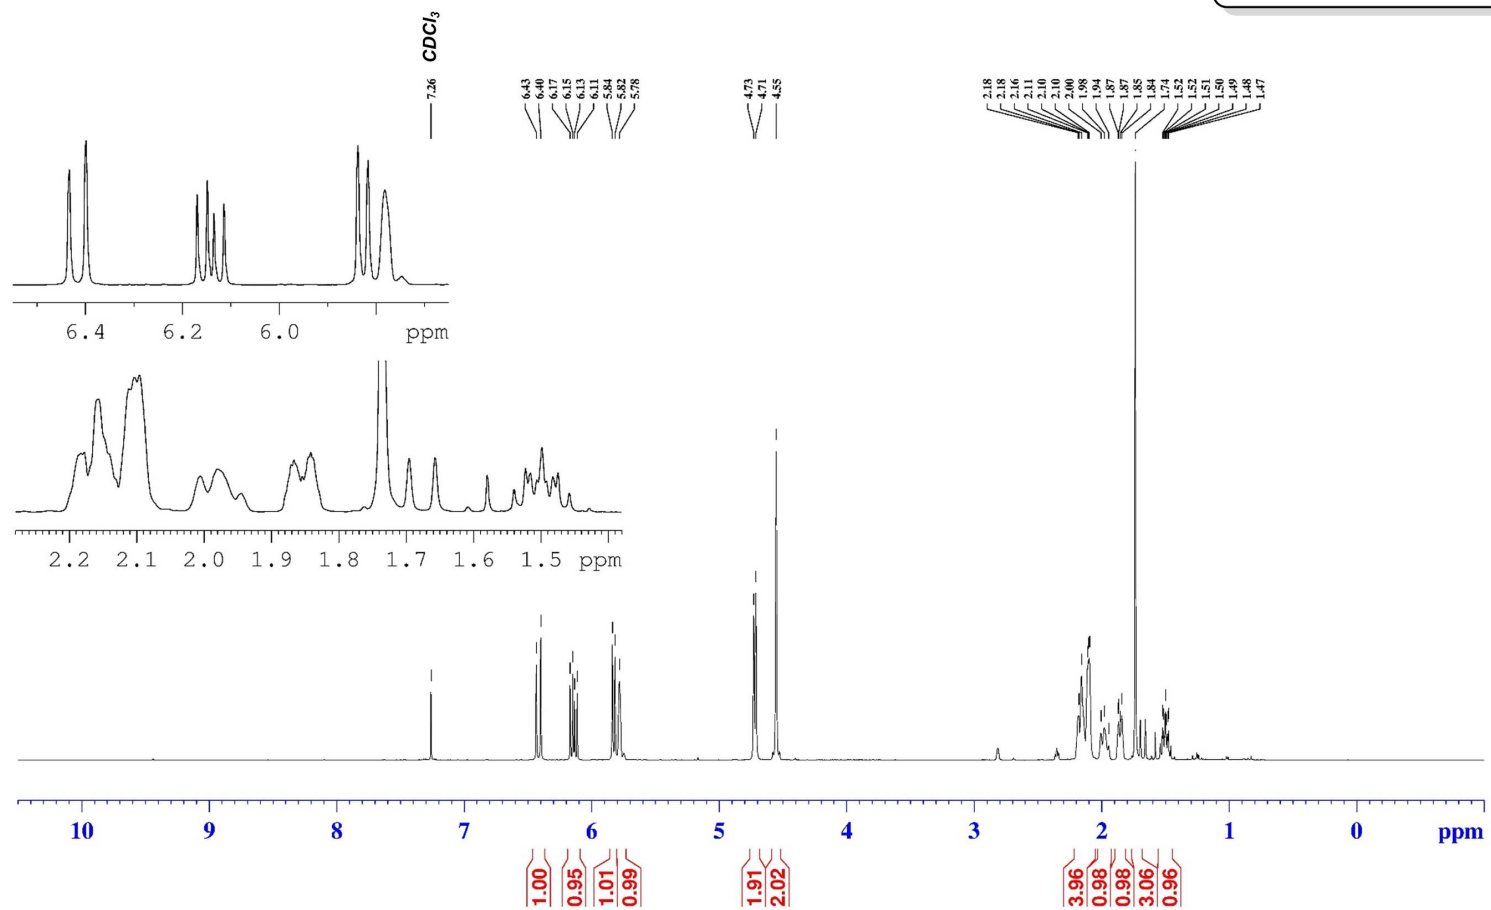

S147

(S)-(4-(prop-1-en-2-yl)cyclohex-1-en-1-yl)methyl acrylate  
125 MHz, CDCl<sub>3</sub>

<sup>1</sup>H NMR

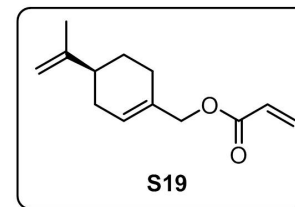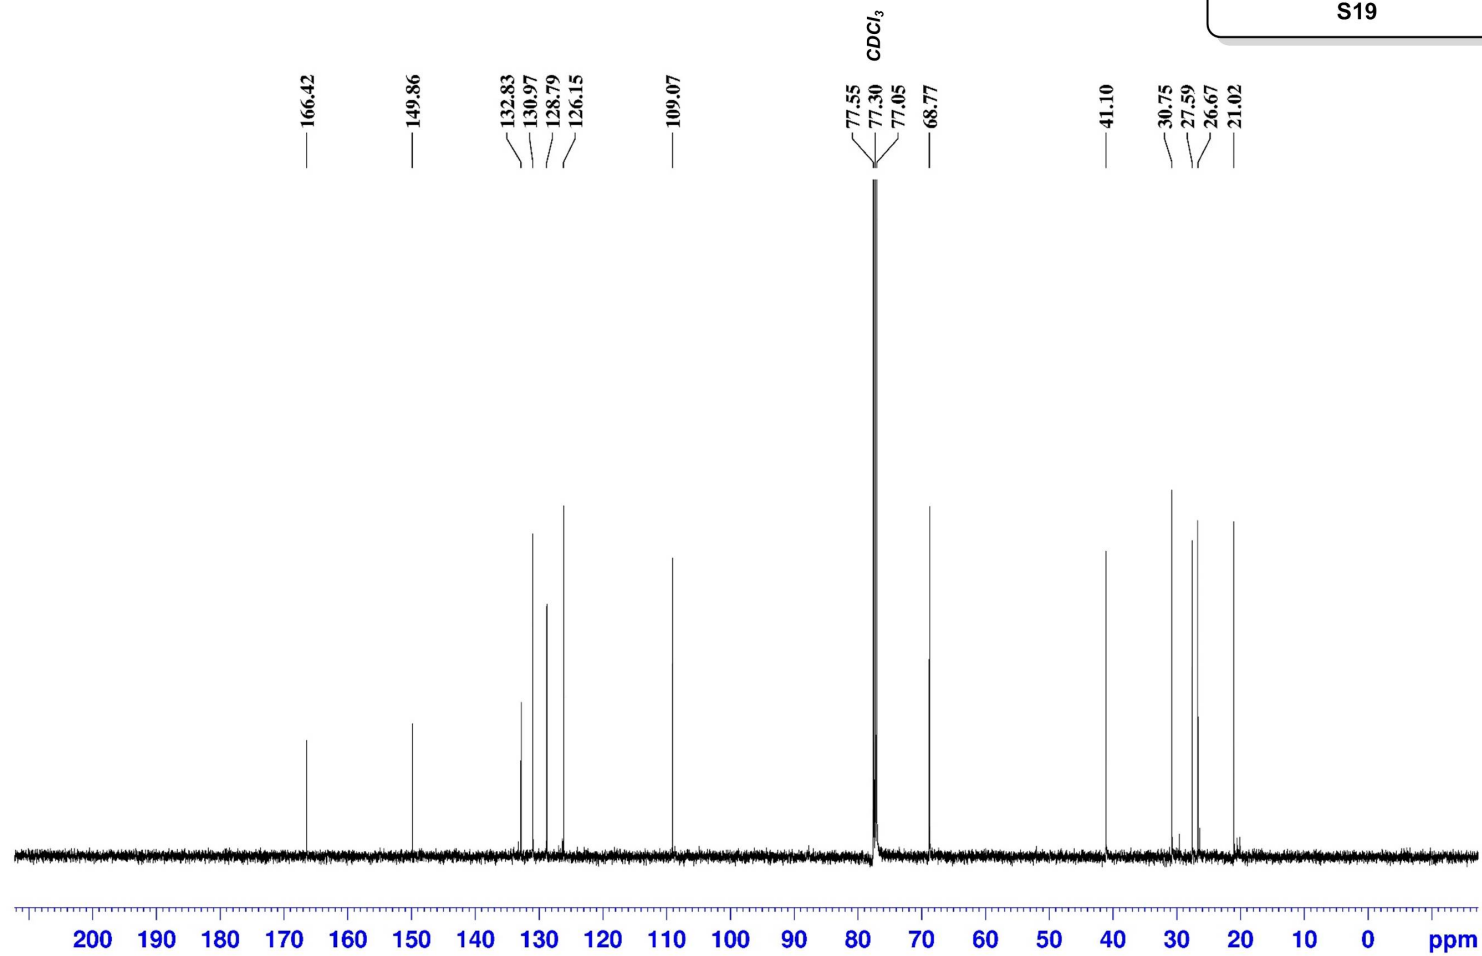

S148

2-((S)-6,6-dimethylbicyclo[3.1.1]hept-2-en-2-yl)ethyl acrylate  
500 MHz, CDCl<sub>3</sub>

<sup>1</sup>H NMR

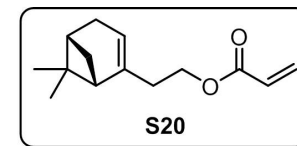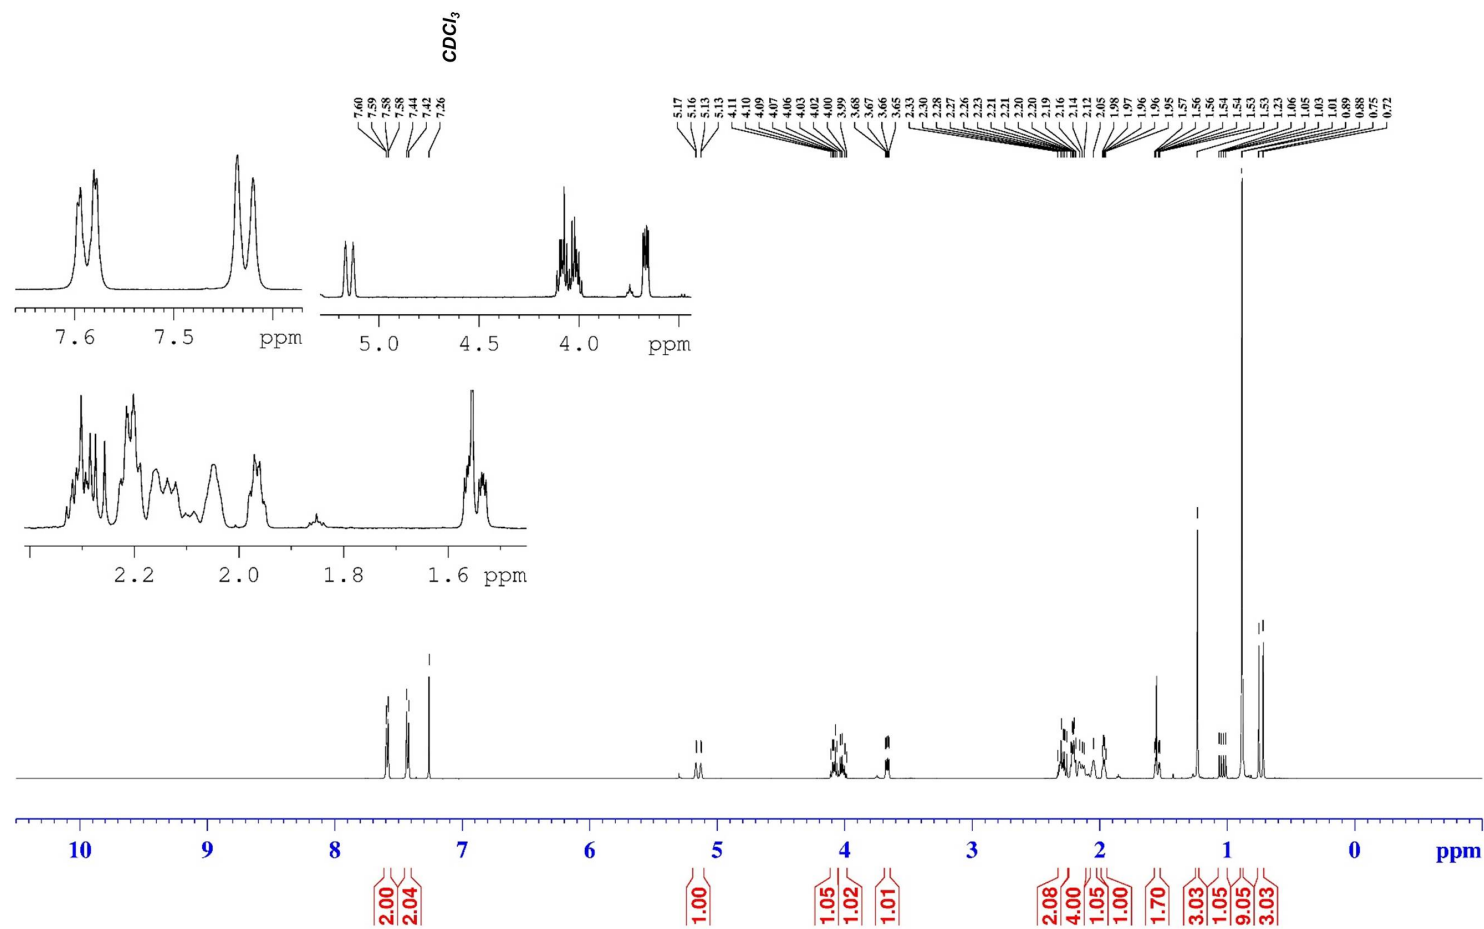

S149

2-((S)-6,6-dimethylbicyclo[3.1.1]hept-2-en-2-yl)ethyl acrylate  
125 MHz, CDCl<sub>3</sub>

<sup>1</sup>H NMR

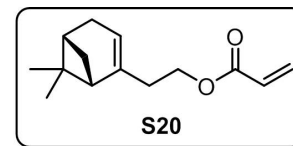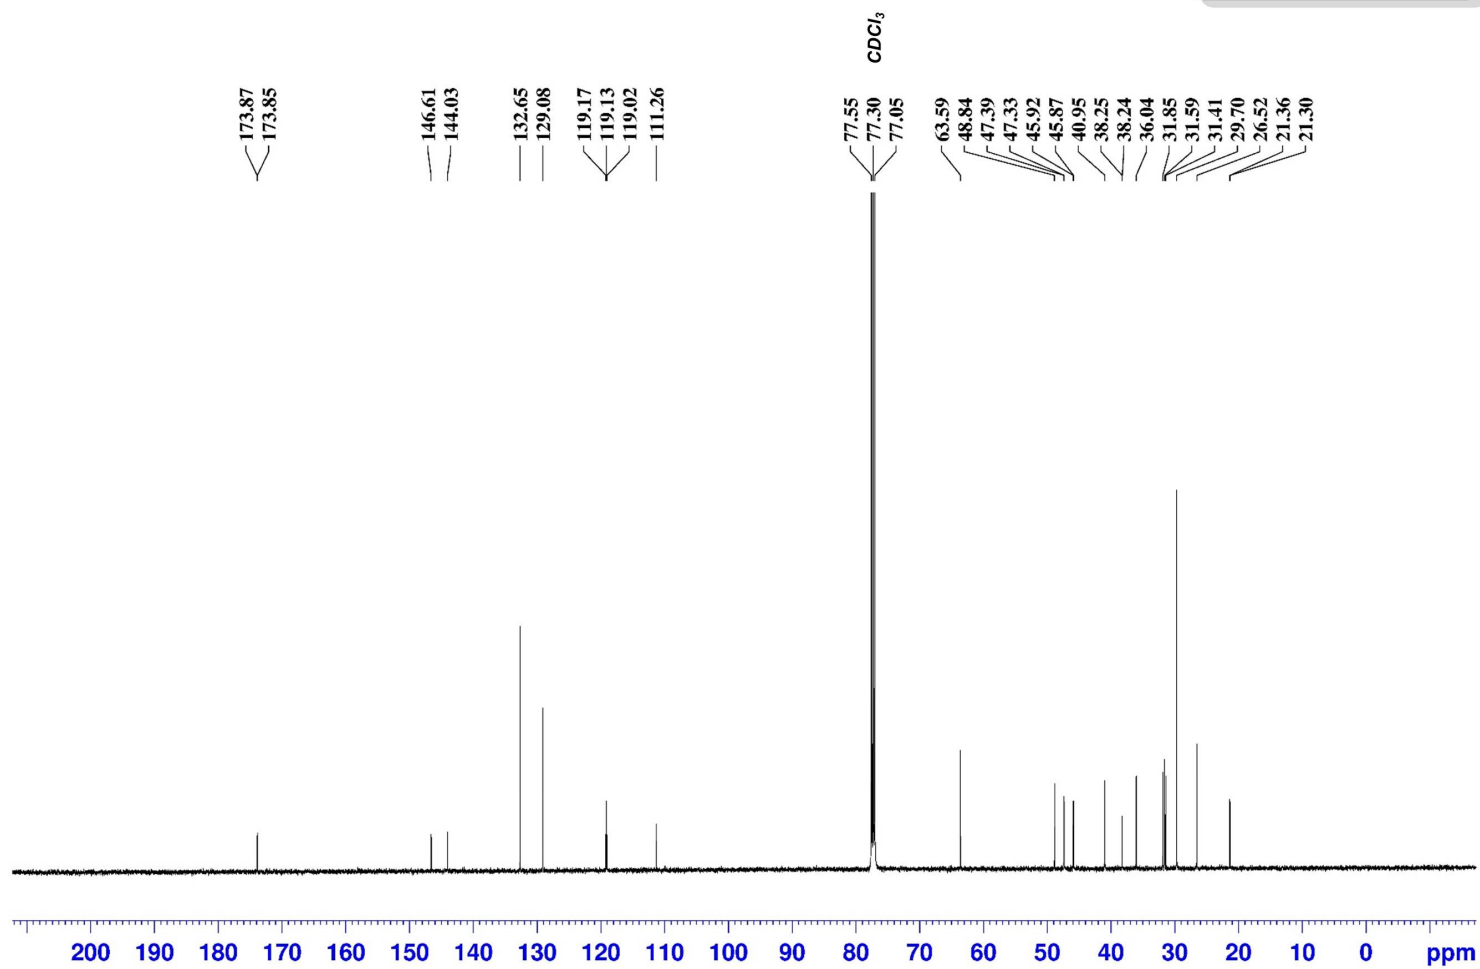

S150

Cholesteryl acrylate  
500 MHz, CDCl<sub>3</sub>

<sup>1</sup>H NMR

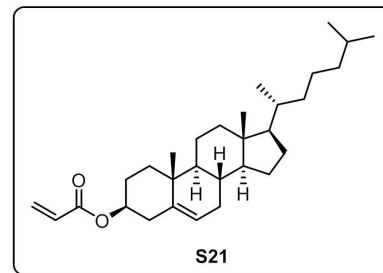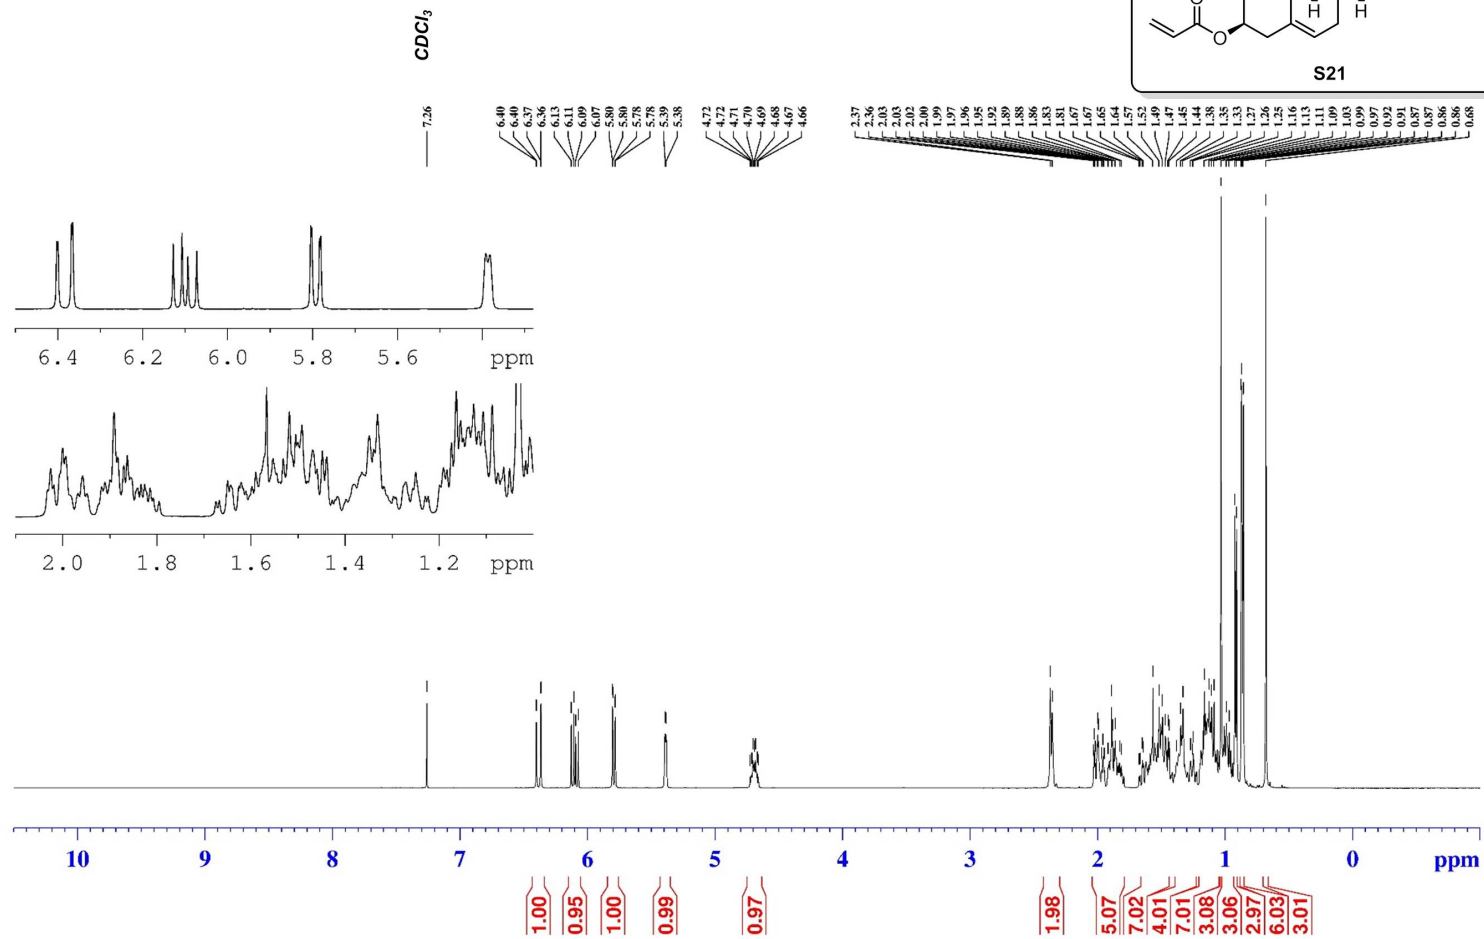

S151

Cholesteryl acrylate  
125 MHz, CDCl<sub>3</sub>

<sup>1</sup>H NMR

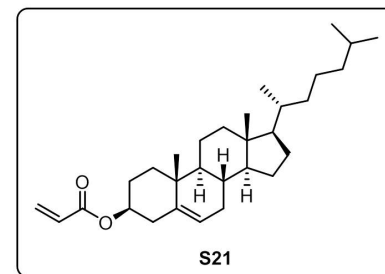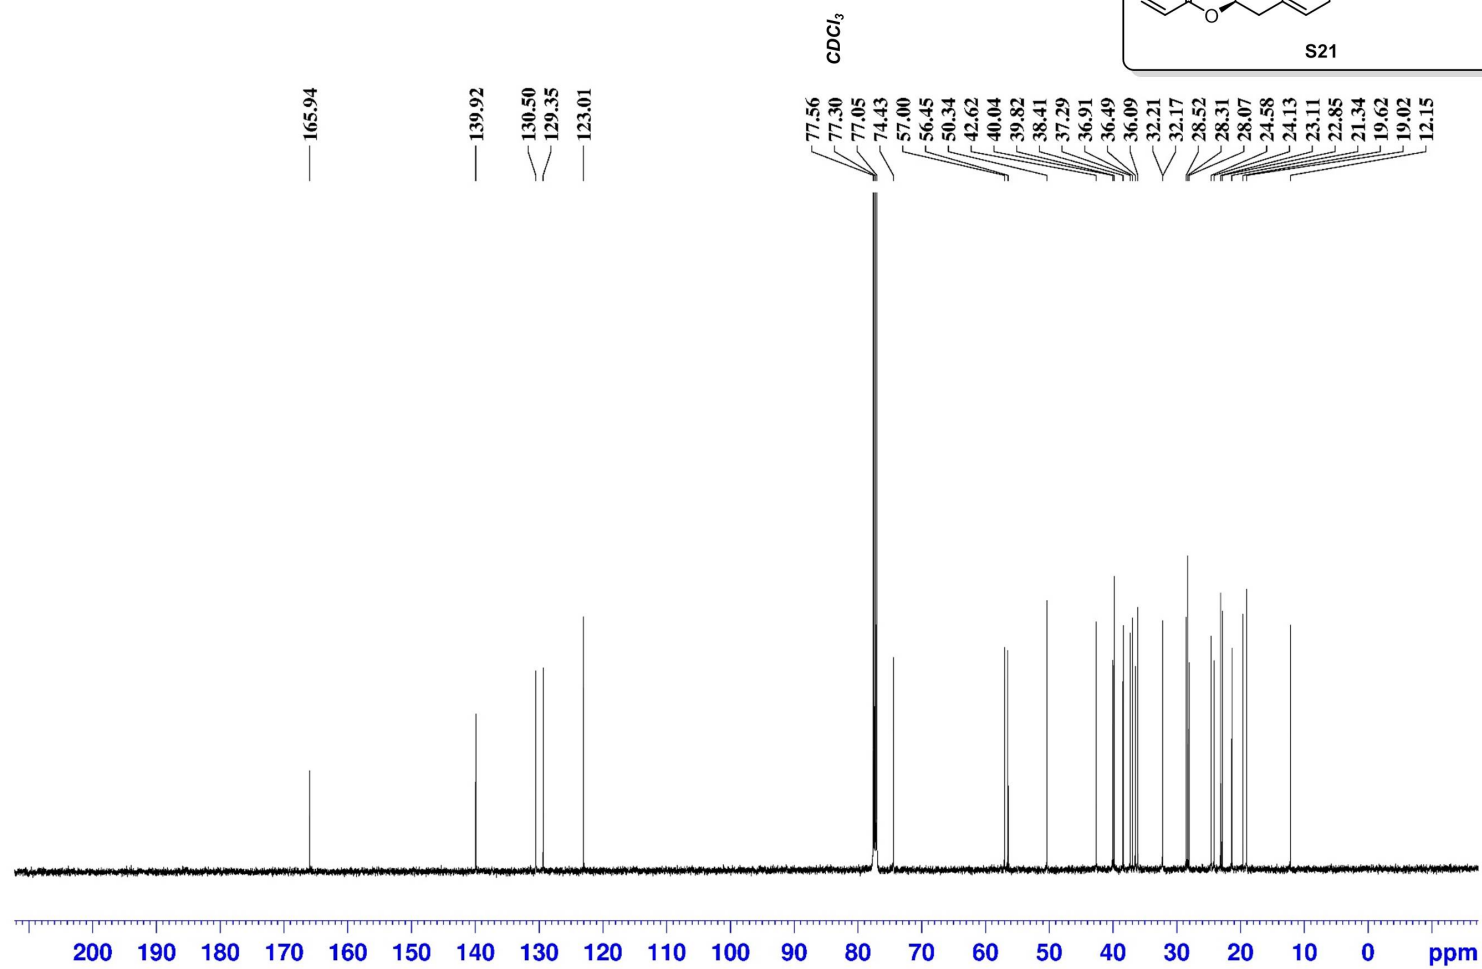



# <sup>1</sup>H NMR

(S)-6-methyl-2-((S)-4-methylcyclohex-3-en-1-yl)hept-5-en-2-yl acrylate  
500 MHz, CDCl<sub>3</sub>

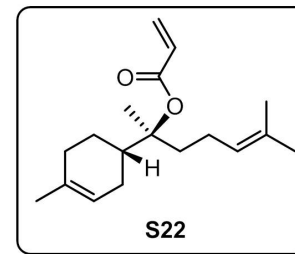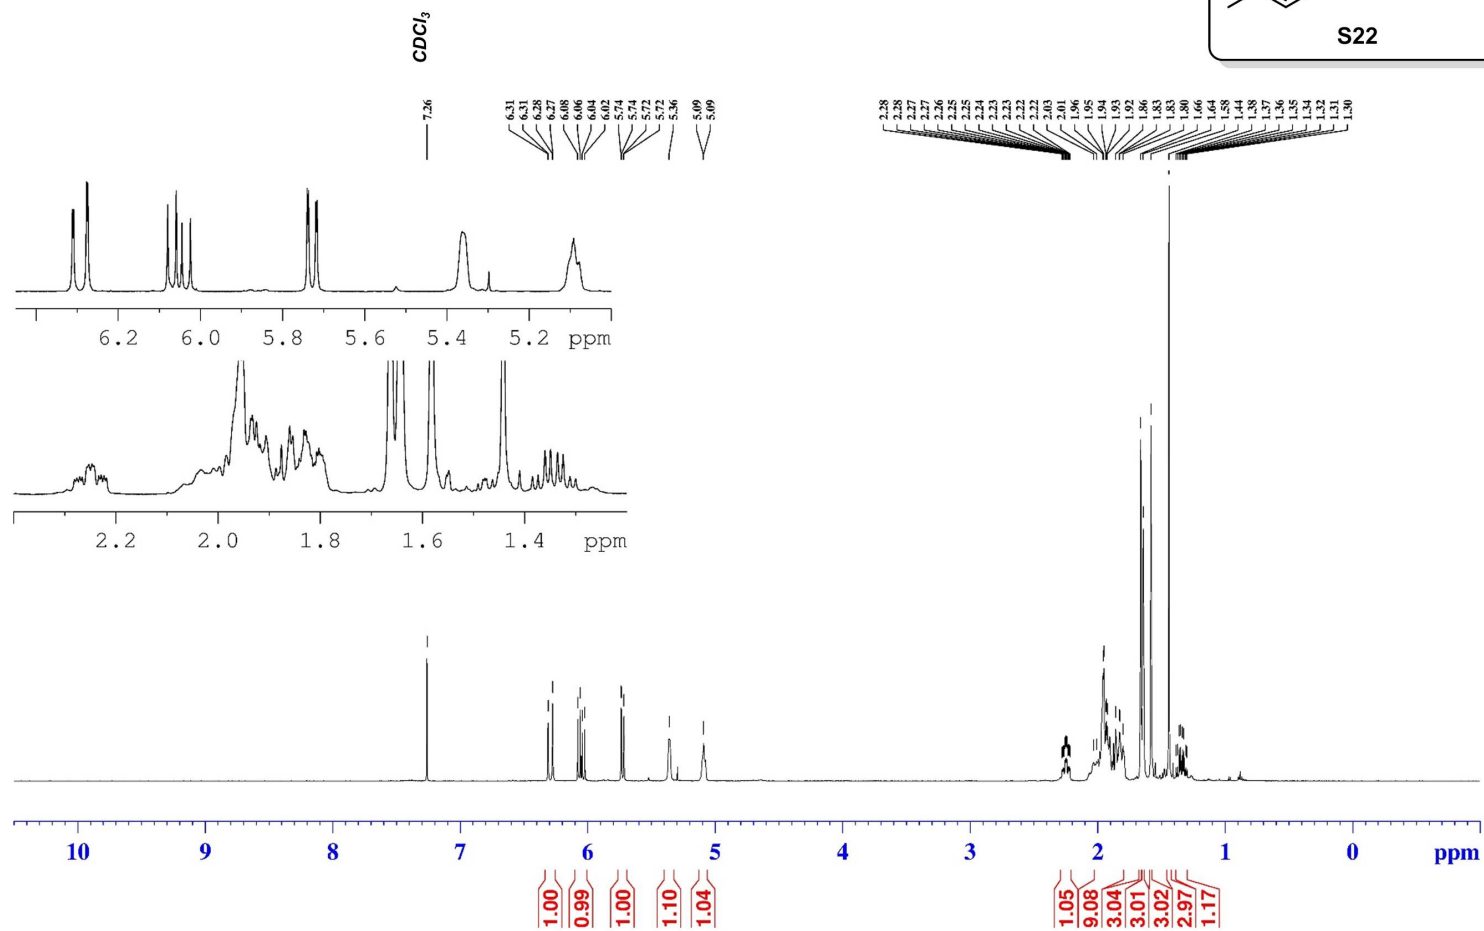

S153

(S)-6-methyl-2-((S)-4-methylcyclohex-3-en-1-yl)hept-5-en-2-yl acrylate  
125 MHz, CDCl<sub>3</sub>

<sup>1</sup>H NMR

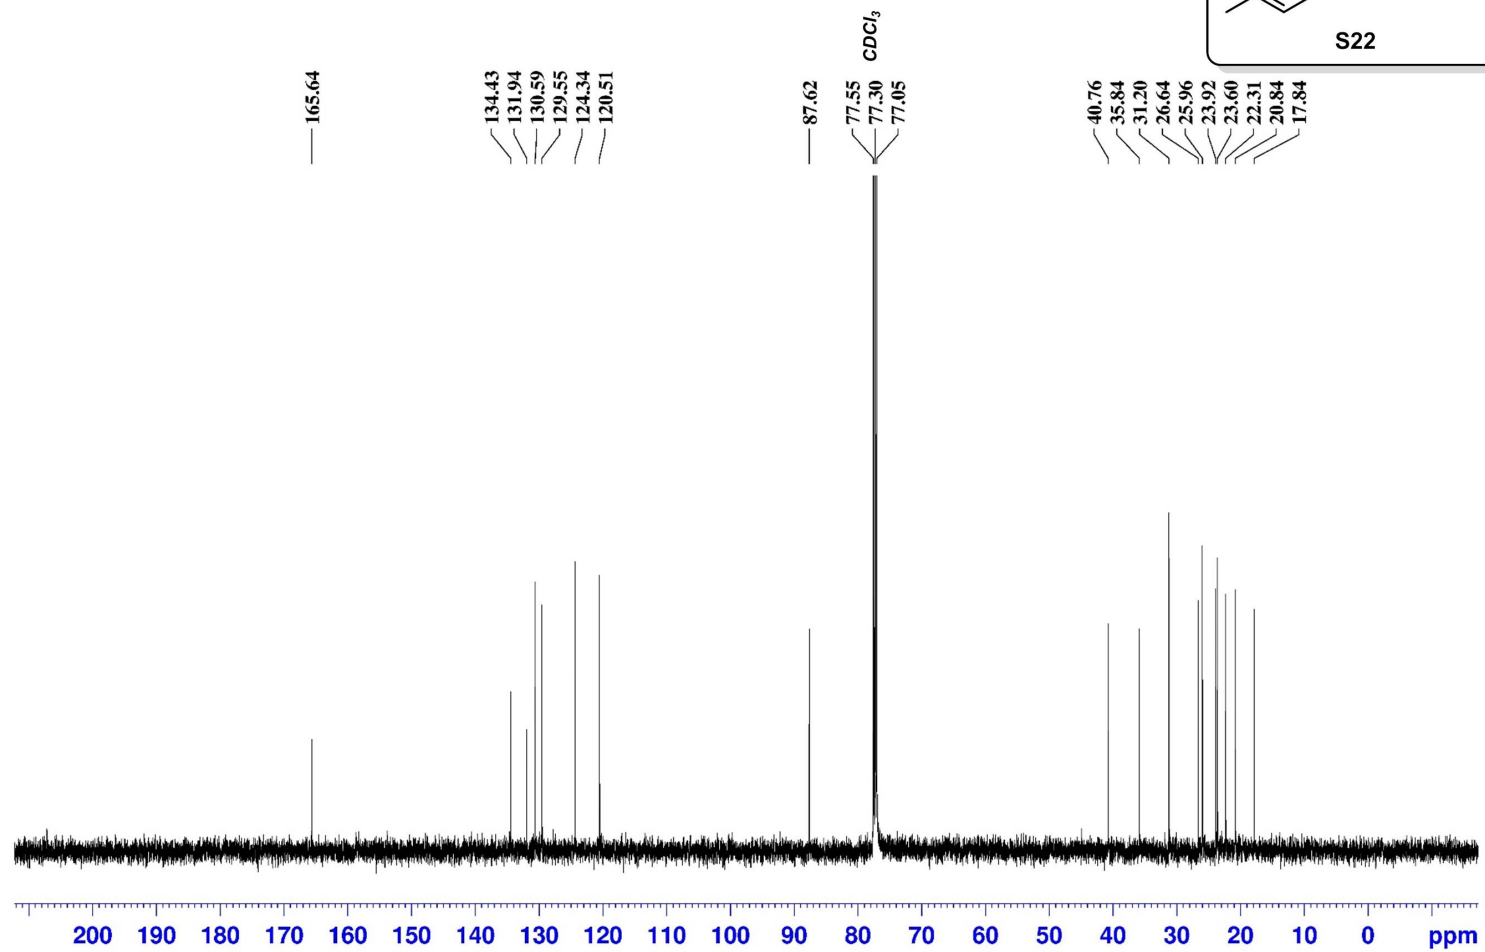

S154

**<sup>1</sup>H NMR**

**2-(1-(4-chlorophenyl)-3,3-dimethylbutyl)-4,4,5,5-tetramethyl-1,3,2-dioxaborolane**  
**500 MHz, CDCl<sub>3</sub>**

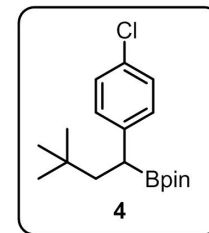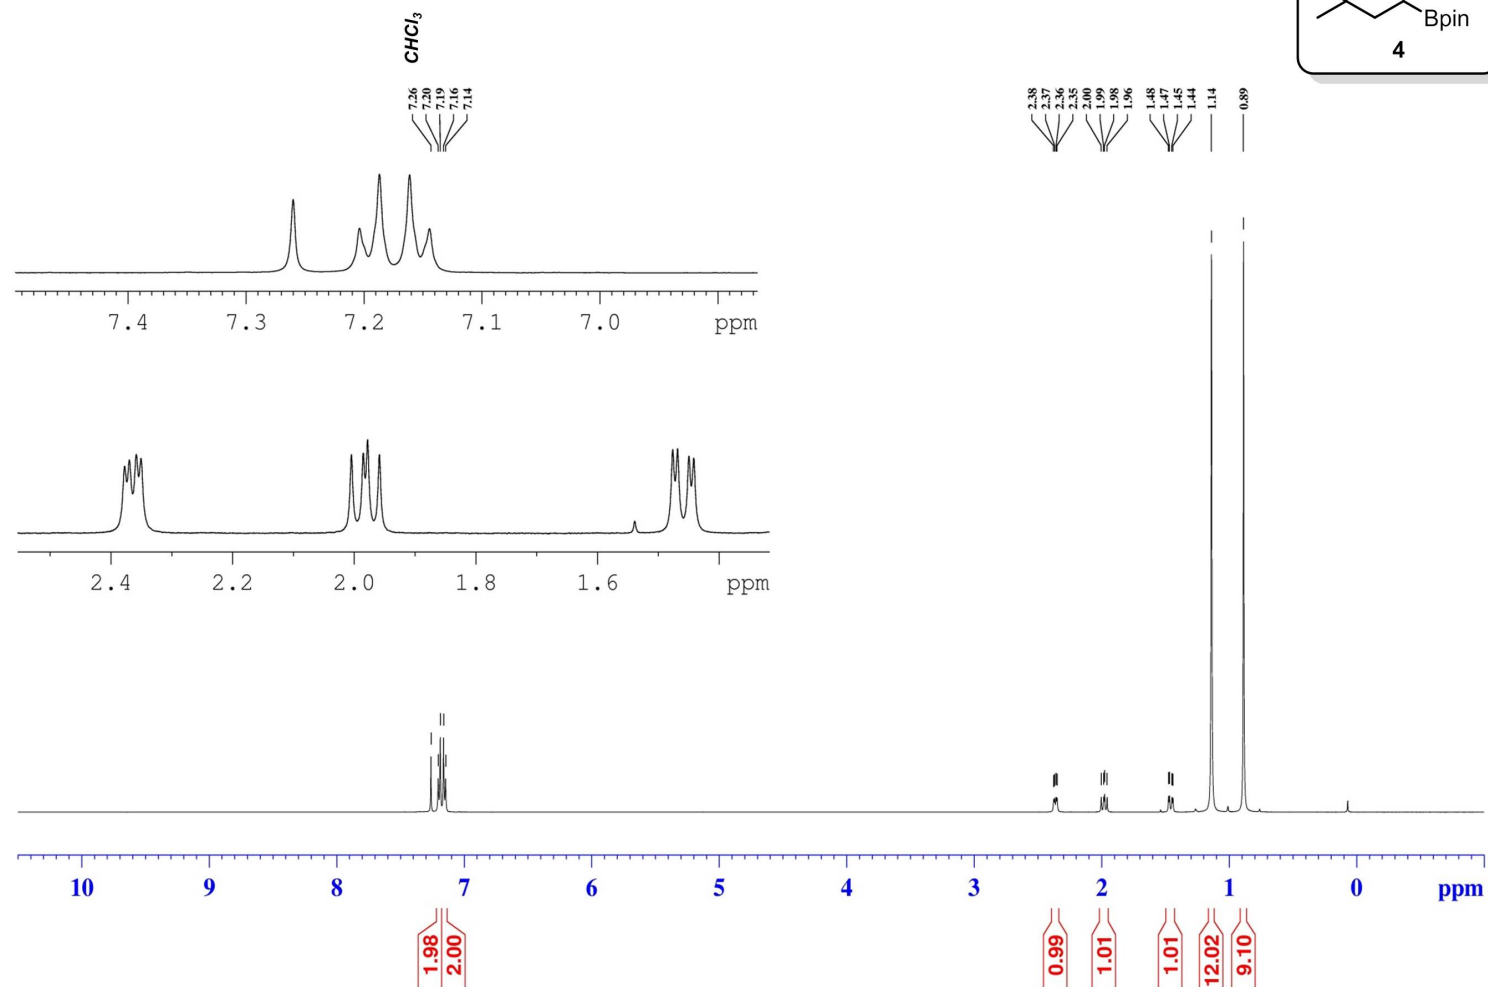

**<sup>13</sup>C NMR**

2-(1-(4-Chlorophenyl)-3,3-dimethylbutyl)-4,4,5,5-tetramethyl-1,3,2-dioxaborolane  
125 MHz, CDCl<sub>3</sub>

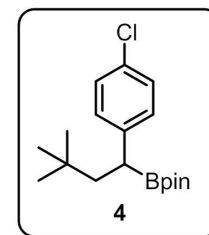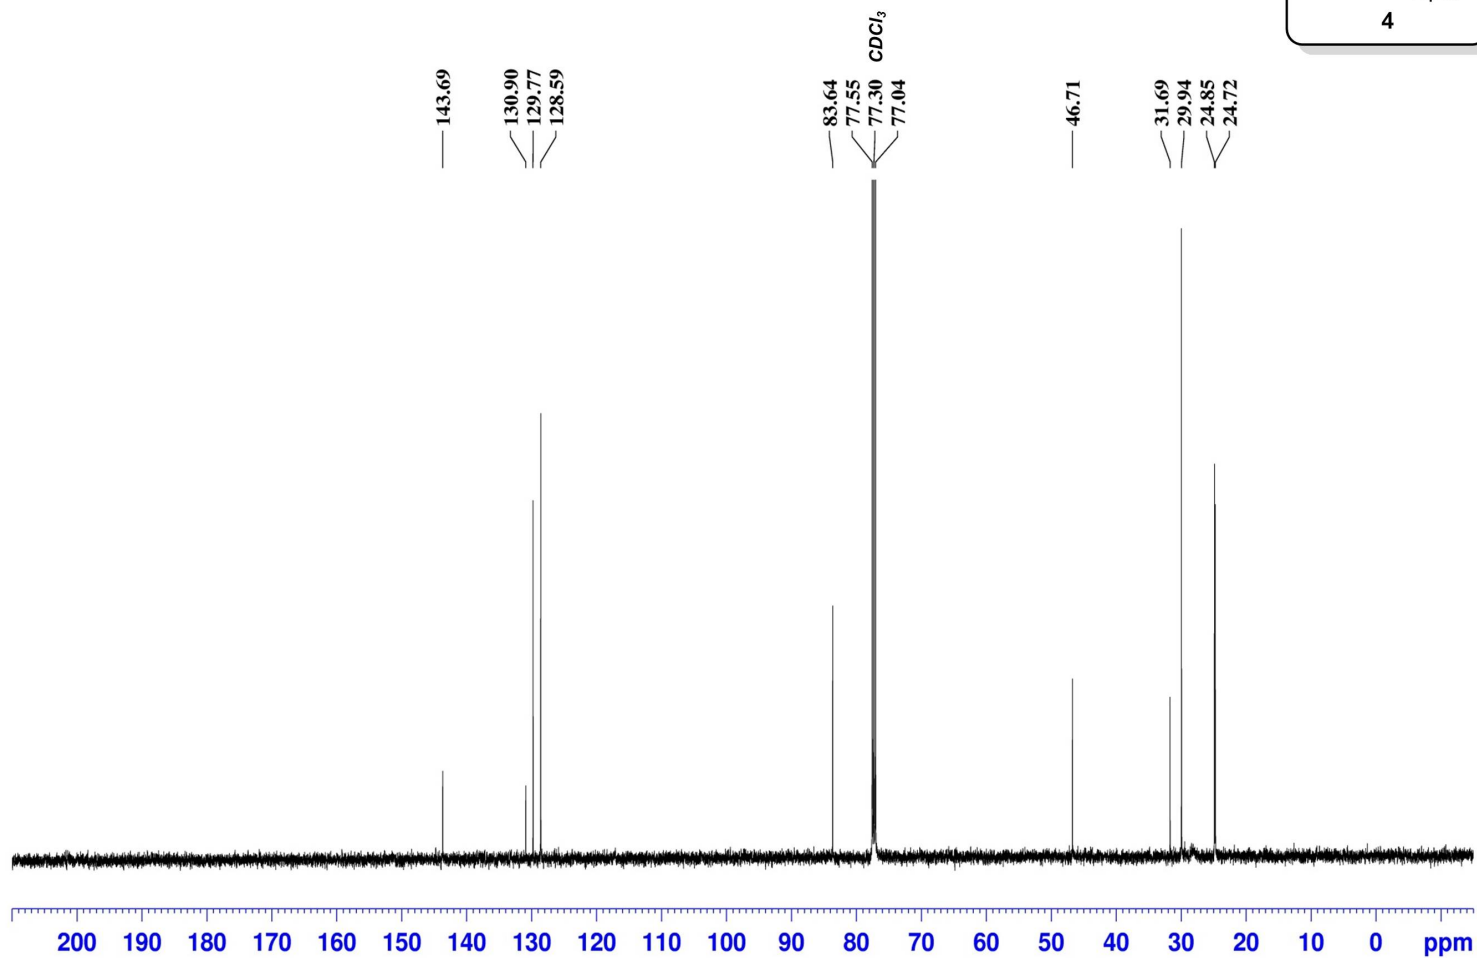

**<sup>11</sup>B NMR**

2-(1-(4-chlorophenyl)-3,3-dimethylbutyl)-4,4,5,5-tetramethyl-1,3,2-dioxaborolane  
128 MHz, CDCl<sub>3</sub>

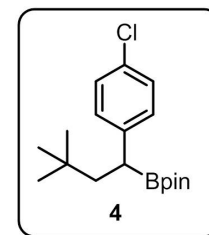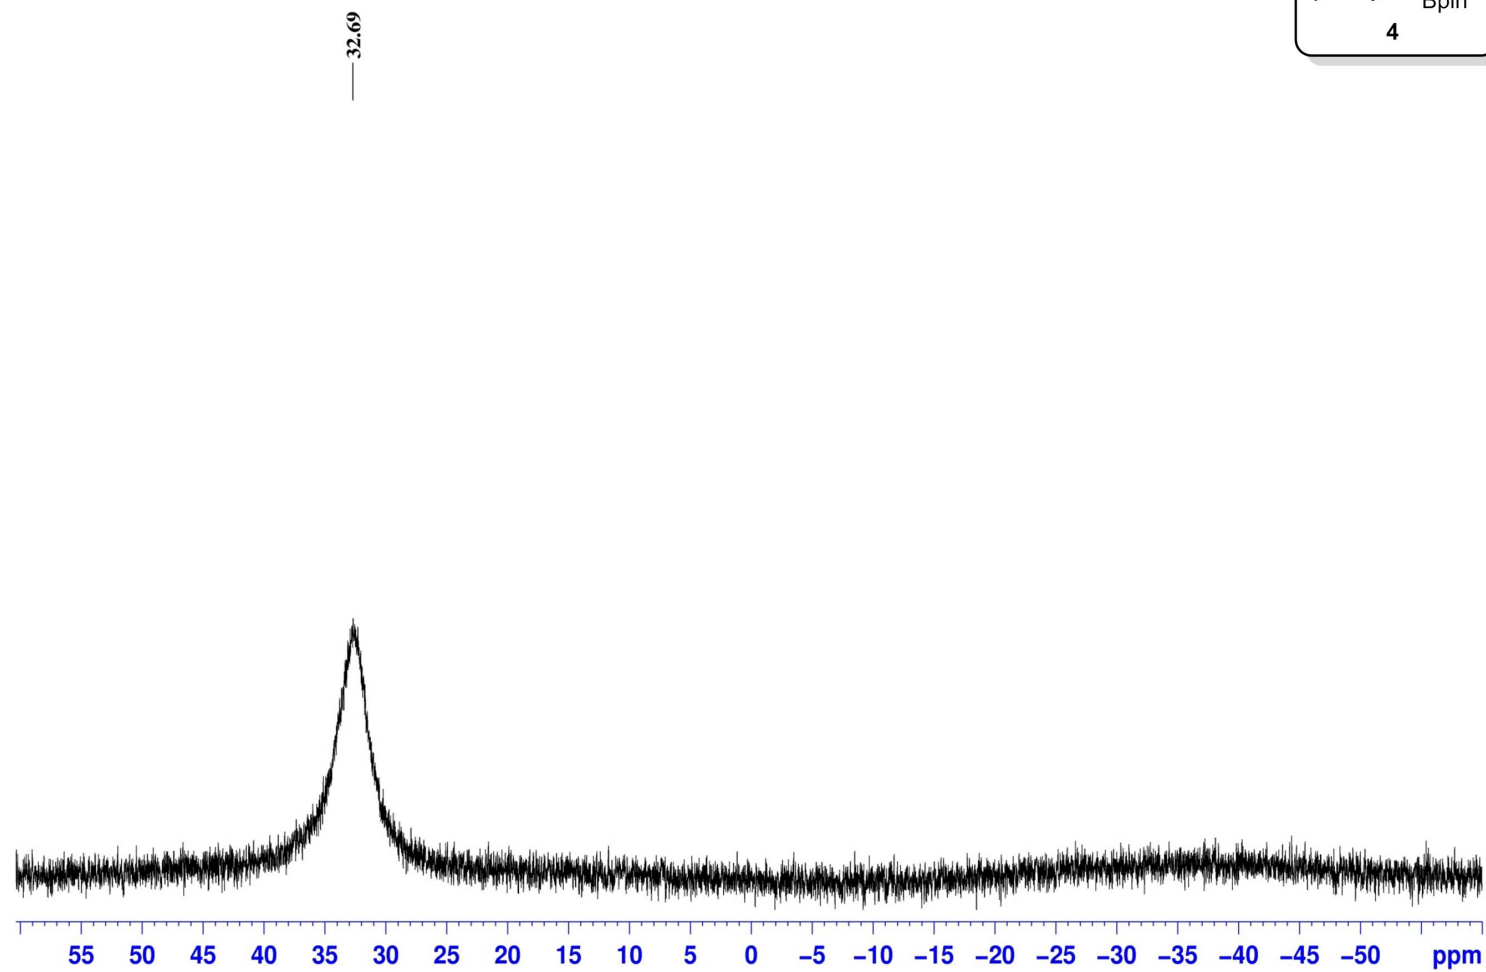

2-(3,3-dimethyl-1-phenylbutyl)-4,4,5,5-tetramethyl-1,3,2-dioxaborolane  
500 MHz, CDCl<sub>3</sub>

<sup>1</sup>H NMR

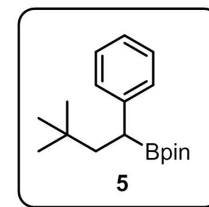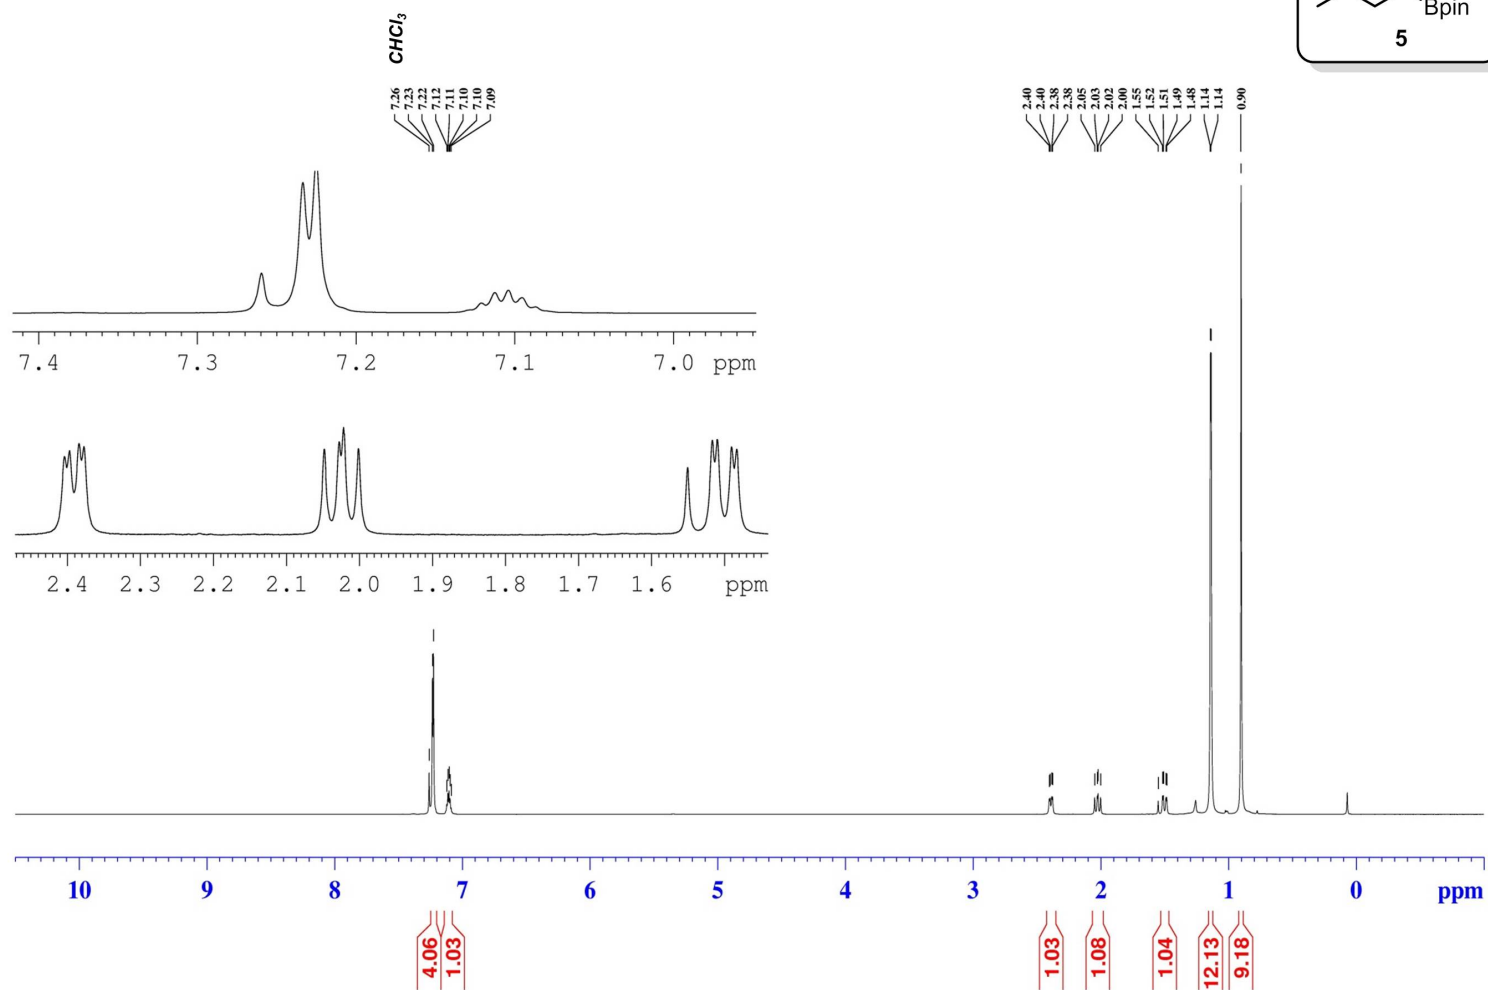

2-(3,3-Dimethyl-1-phenylbutyl)-4,4,5,5-tetramethyl-1,3,2-dioxaborolane  
125 MHz, CDCl<sub>3</sub>

<sup>13</sup>C NMR

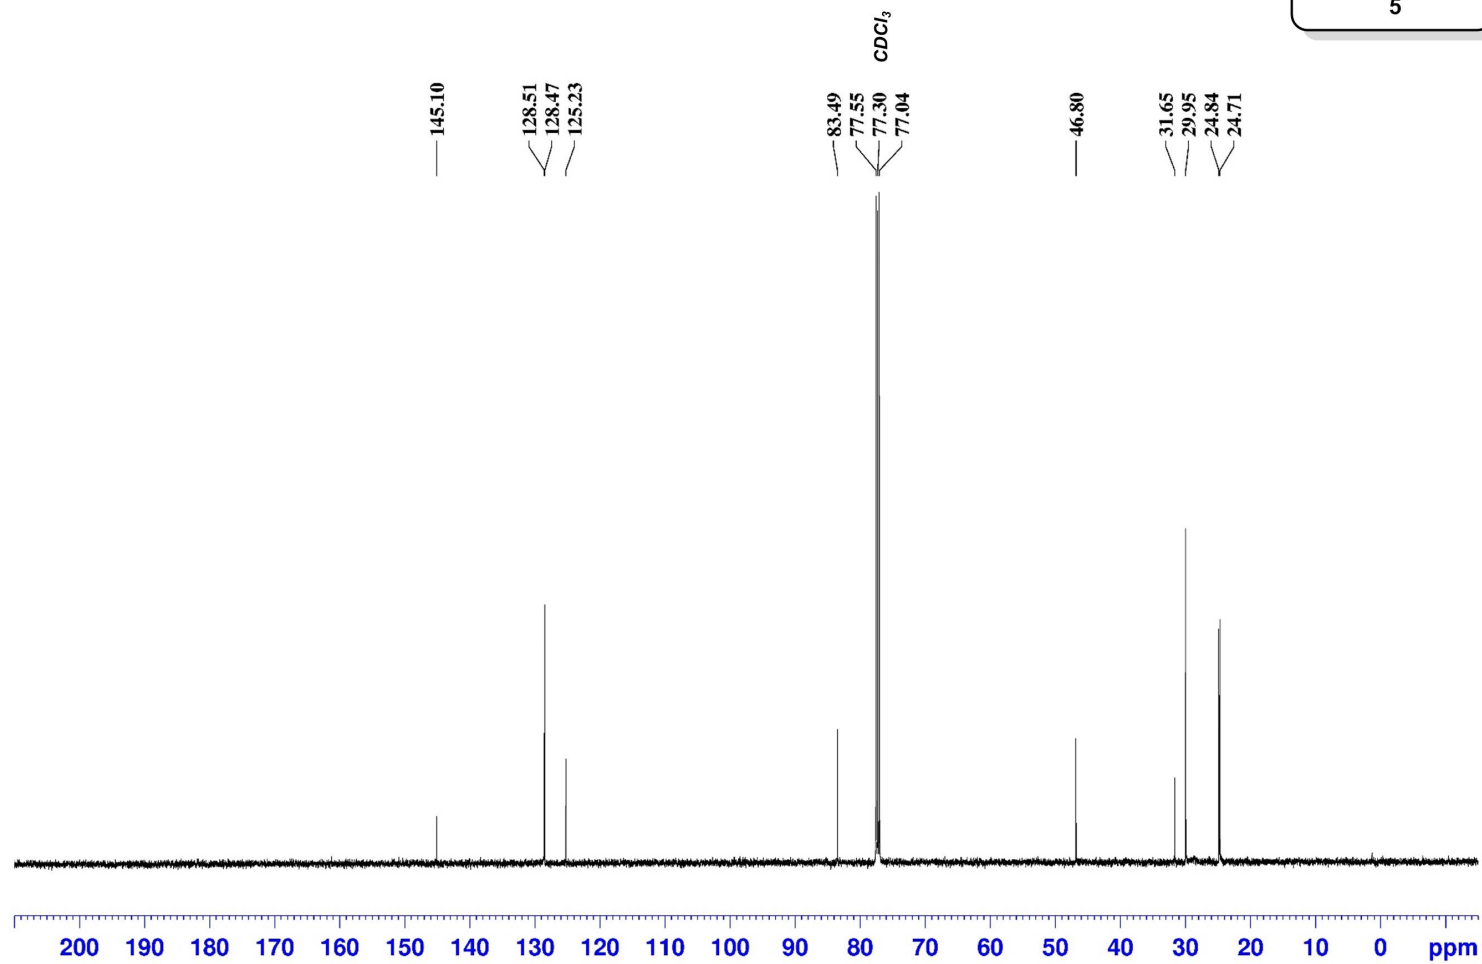

2-(3,3-dimethyl-1-phenylbutyl)-4,4,5,5-tetramethyl-1,3,2-dioxaborolane  
128 MHz, CDCl<sub>3</sub>

<sup>11</sup>B NMR

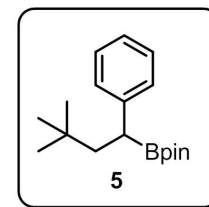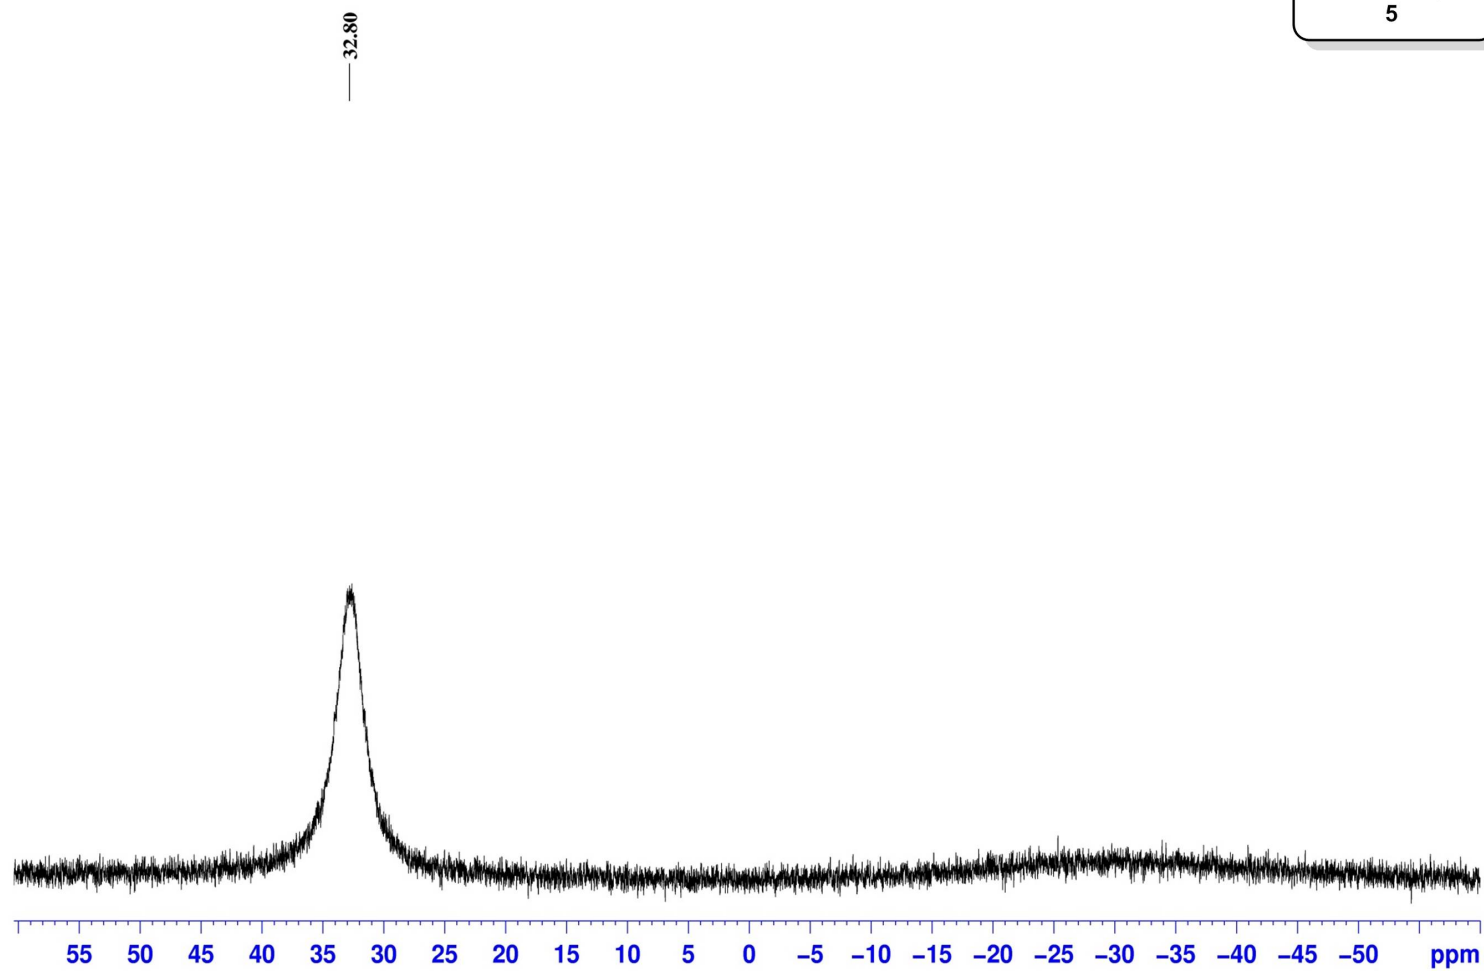

S160



**<sup>1</sup>H NMR**

**2-(3,3-dimethyl-1-(p-tolyl)butyl)-4,4,5,5-tetramethyl-1,3,2-dioxaborolane**  
**500 MHz, CDCl<sub>3</sub>**

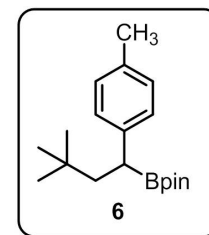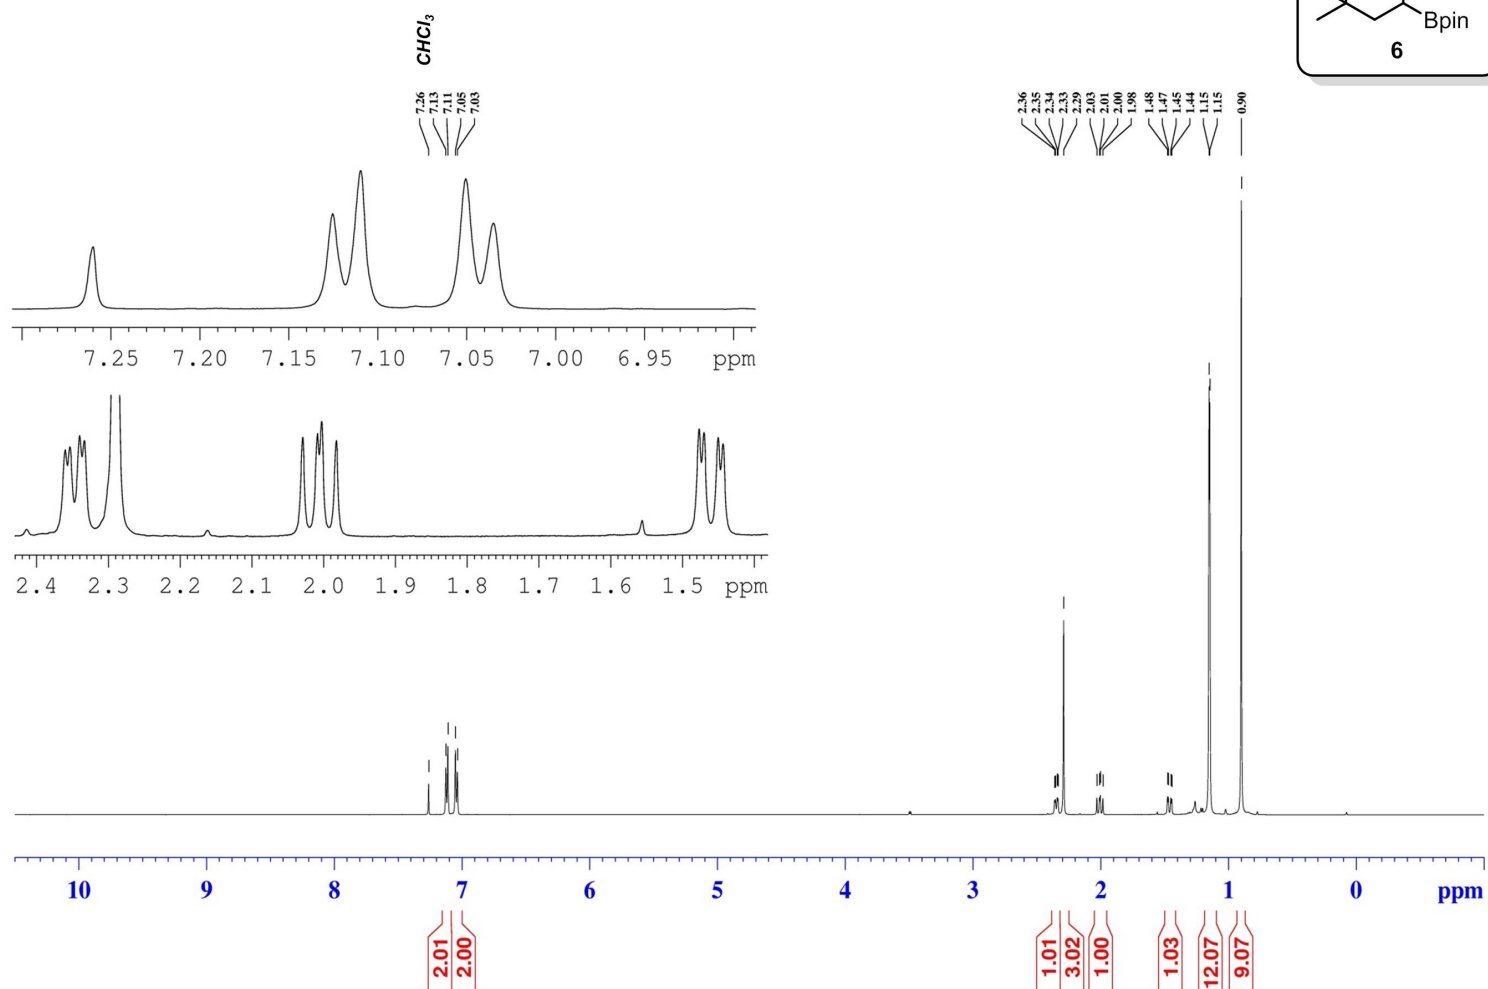

2-(3,3-Dimethyl-1-(p-tolyl)butyl)-4,4,5,5-tetramethyl-1,3,2-dioxaborolane  
125 MHz, CDCl<sub>3</sub>

<sup>13</sup>C NMR

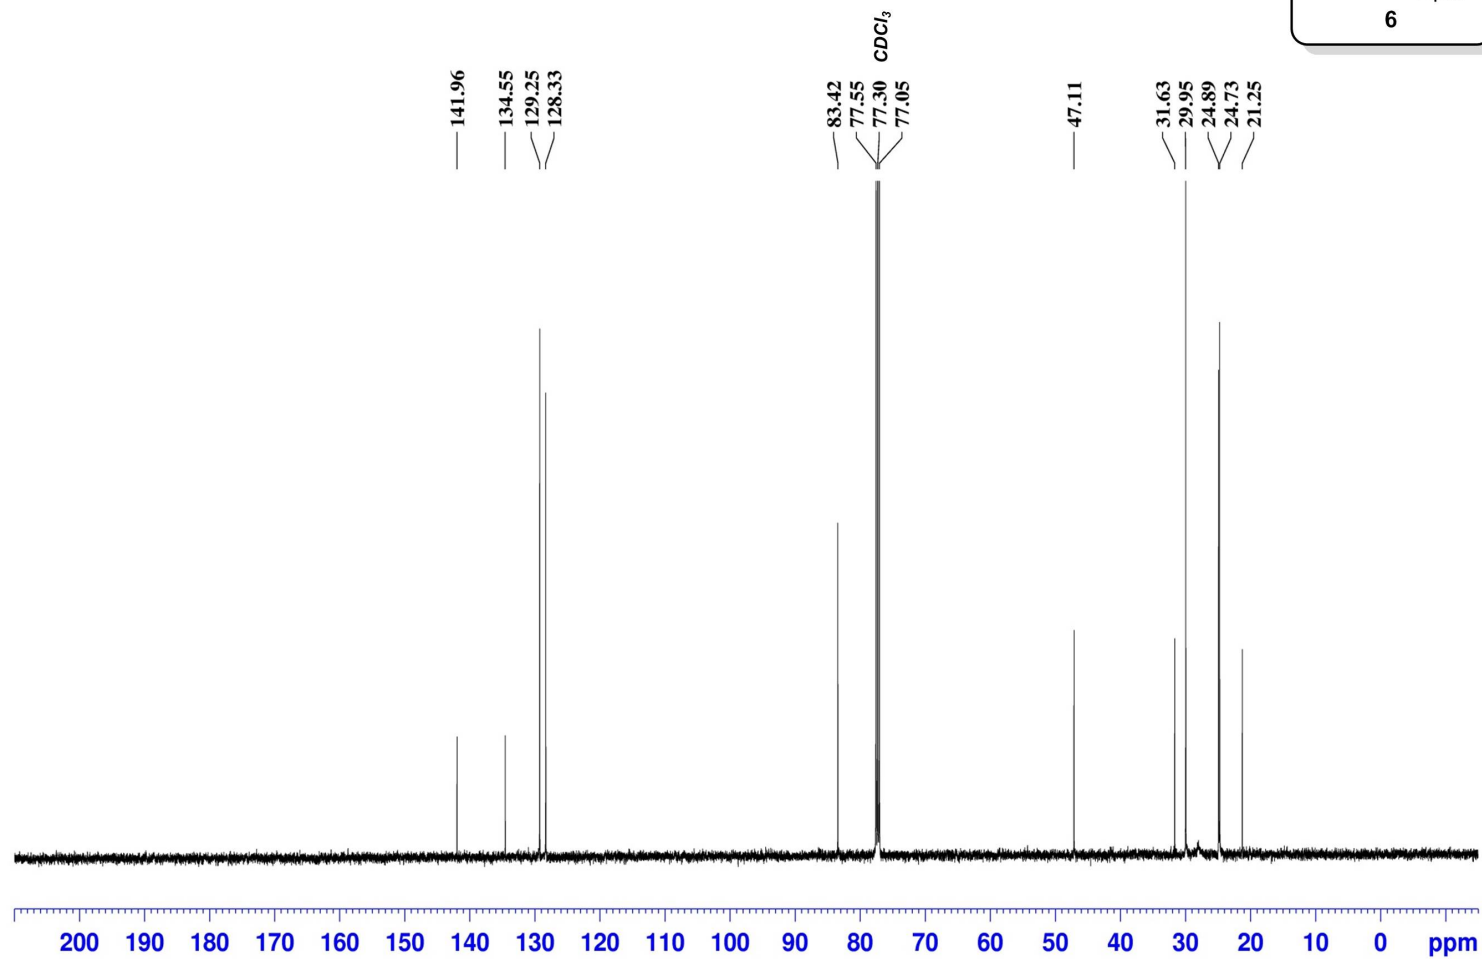

S162

2-(3,3-dimethyl-1-(p-tolyl)butyl)-4,4,5,5-tetramethyl-1,3,2-dioxaborolane  
128 MHz, CDCl<sub>3</sub>

<sup>11</sup>B NMR

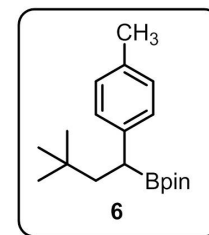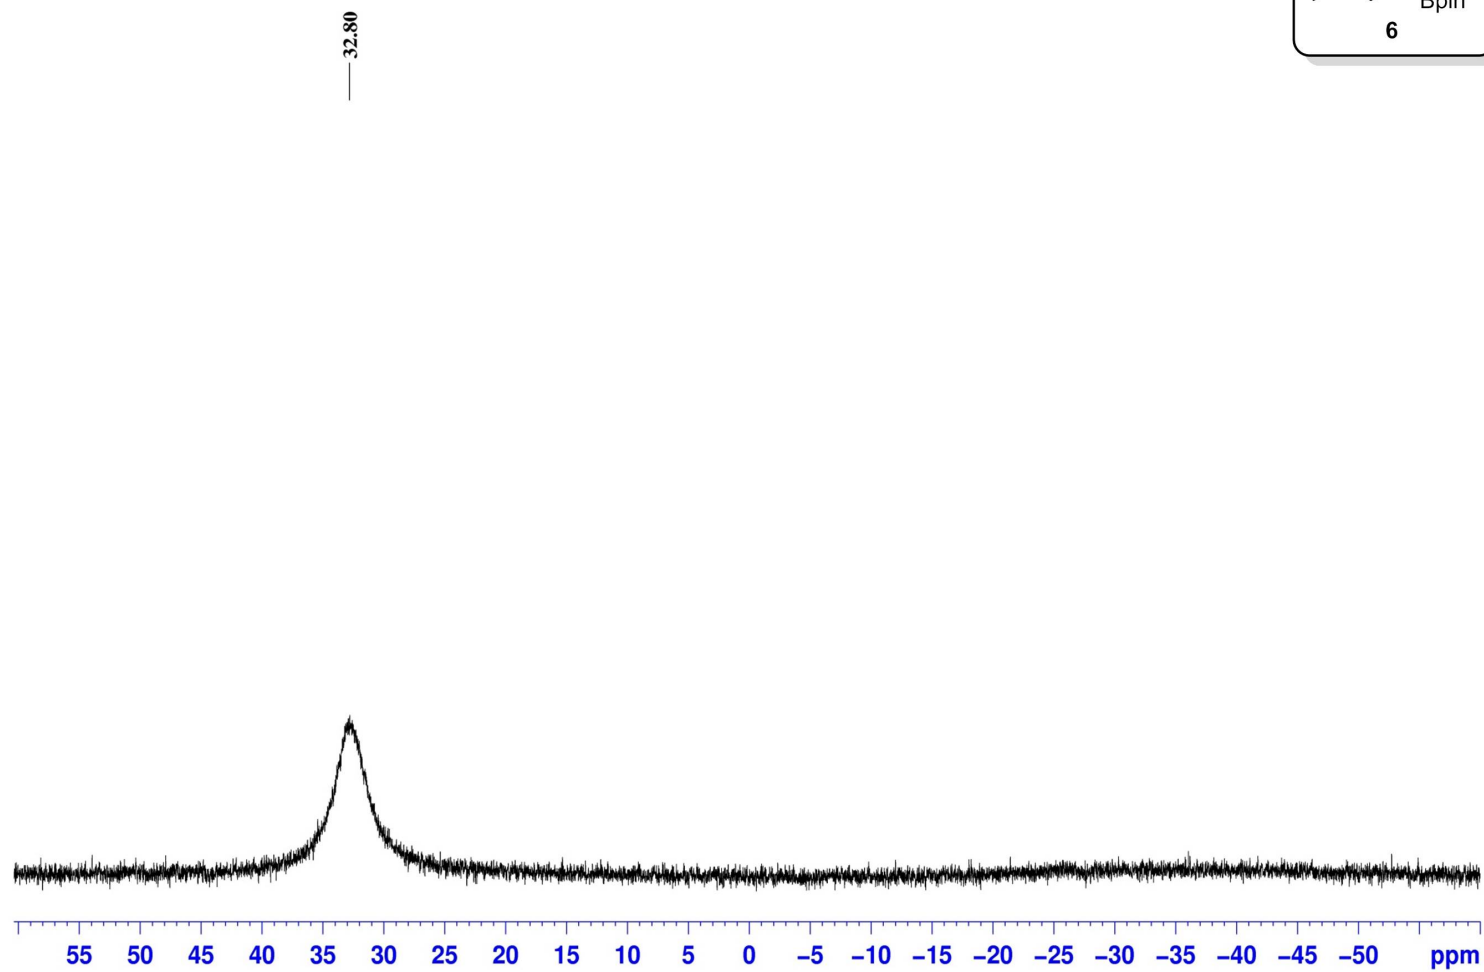

S163

**<sup>1</sup>H NMR**

4-(3,3-dimethyl-1-(4,4,5,5-tetramethyl-1,3,2-dioxaborolan-2-yl)butyl)benzonitrile  
500 MHz, CDCl<sub>3</sub>

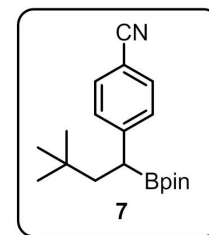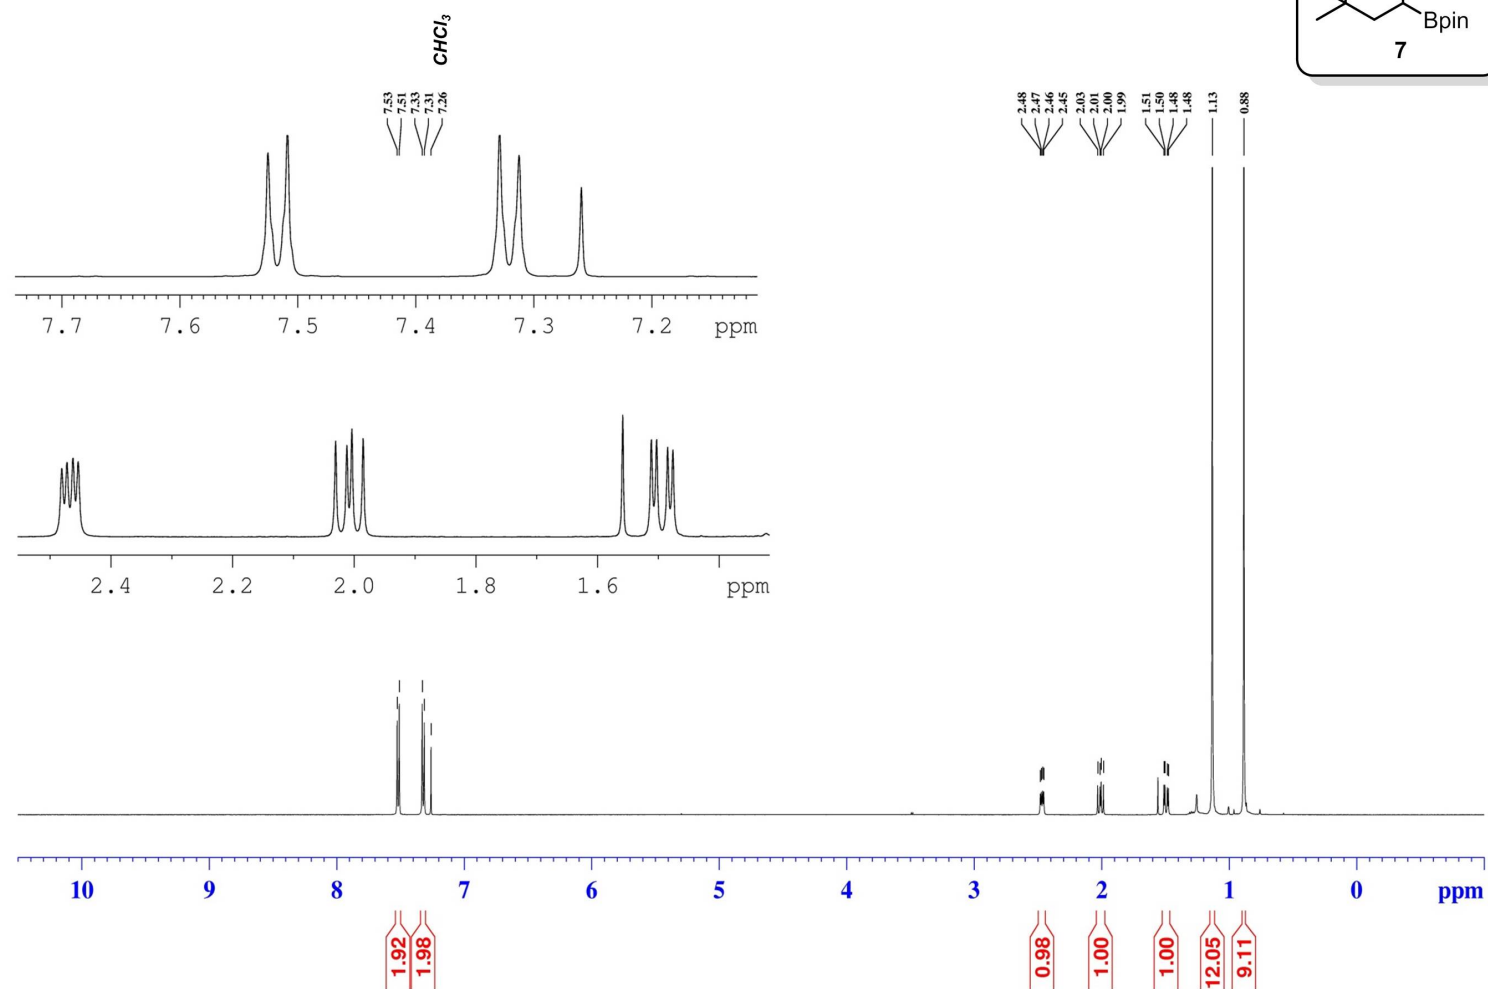

**<sup>13</sup>C NMR**

4-(3,3-Dimethyl-1-(4,4,5,5-tetramethyl-1,3,2-dioxaborolan-2-yl)butyl)benzonitrile  
125 MHz, CDCl<sub>3</sub>

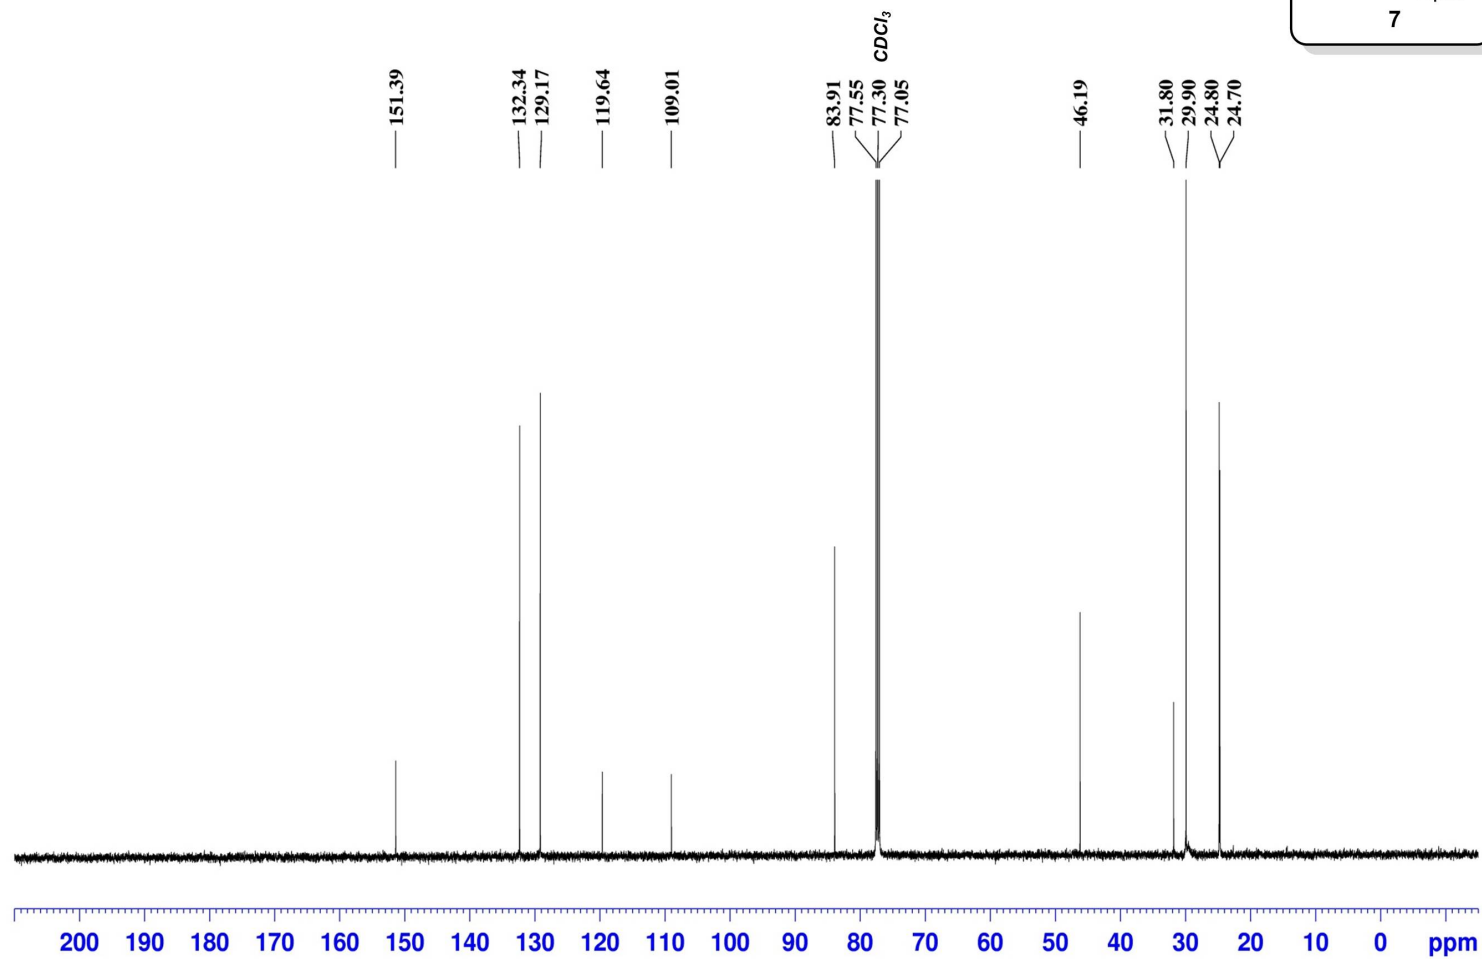

**<sup>11</sup>B NMR**

4-(3,3-dimethyl-1-(4,4,5,5-tetramethyl-1,3,2-dioxaborolan-2-yl)butyl)benzonitrile  
128 MHz, CDCl<sub>3</sub>

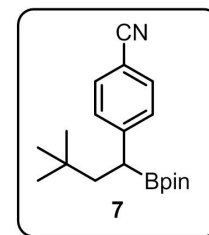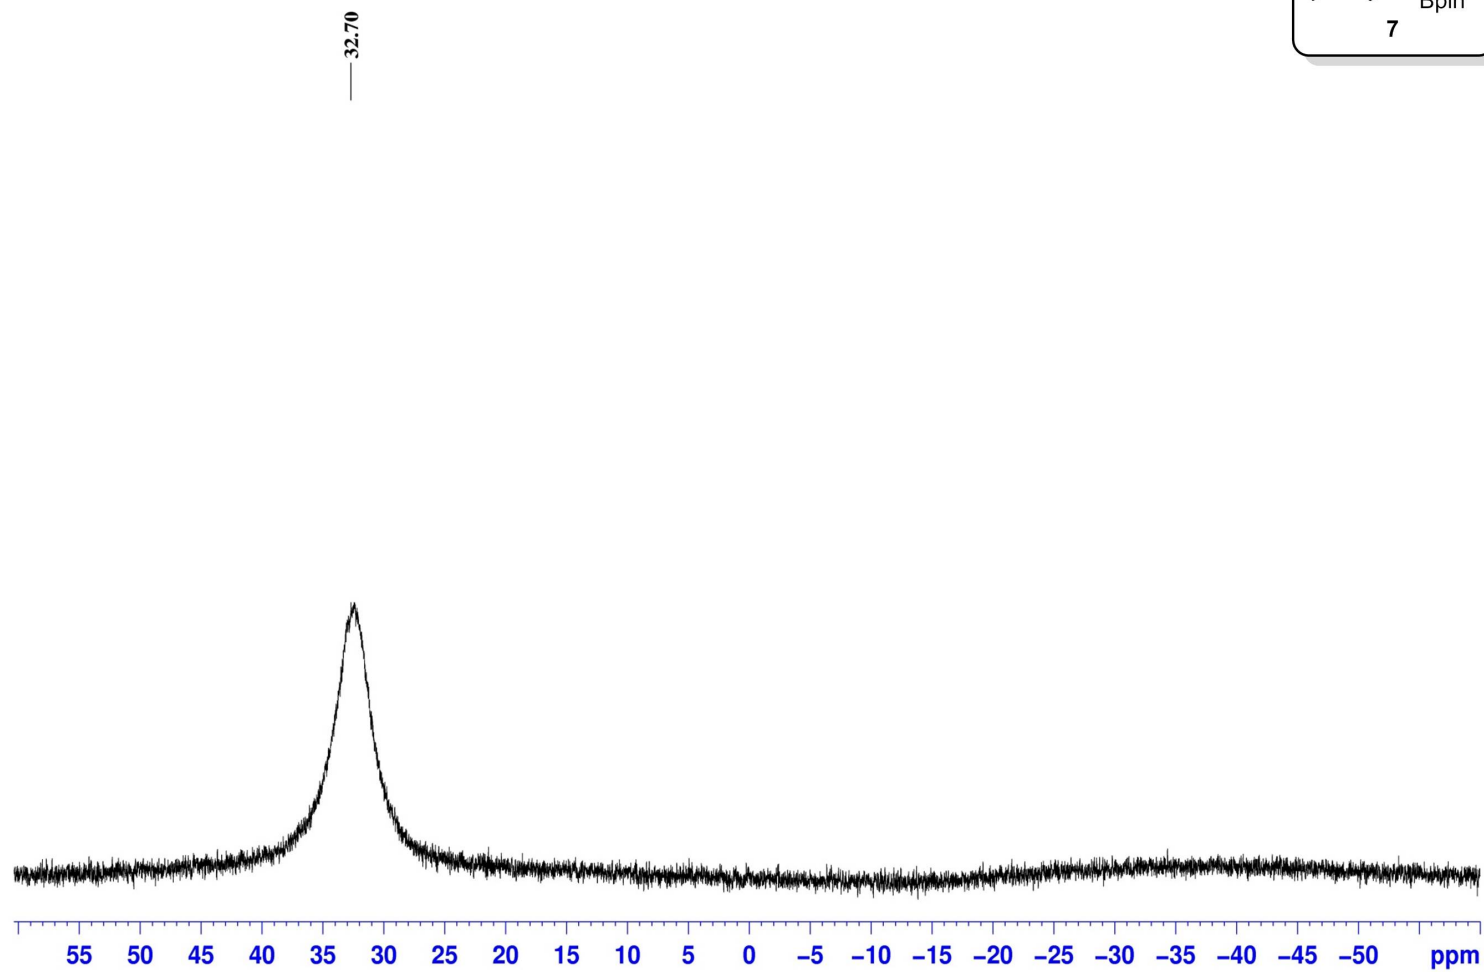

# <sup>1</sup>H NMR

methyl 4-(3,3-dimethyl-1-(4,4,5,5-tetramethyl-1,3,2-dioxaborolan-2-yl)butyl)benzoate  
500 MHz, CDCl<sub>3</sub>

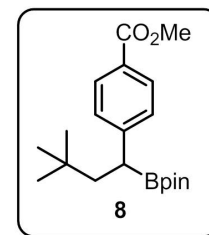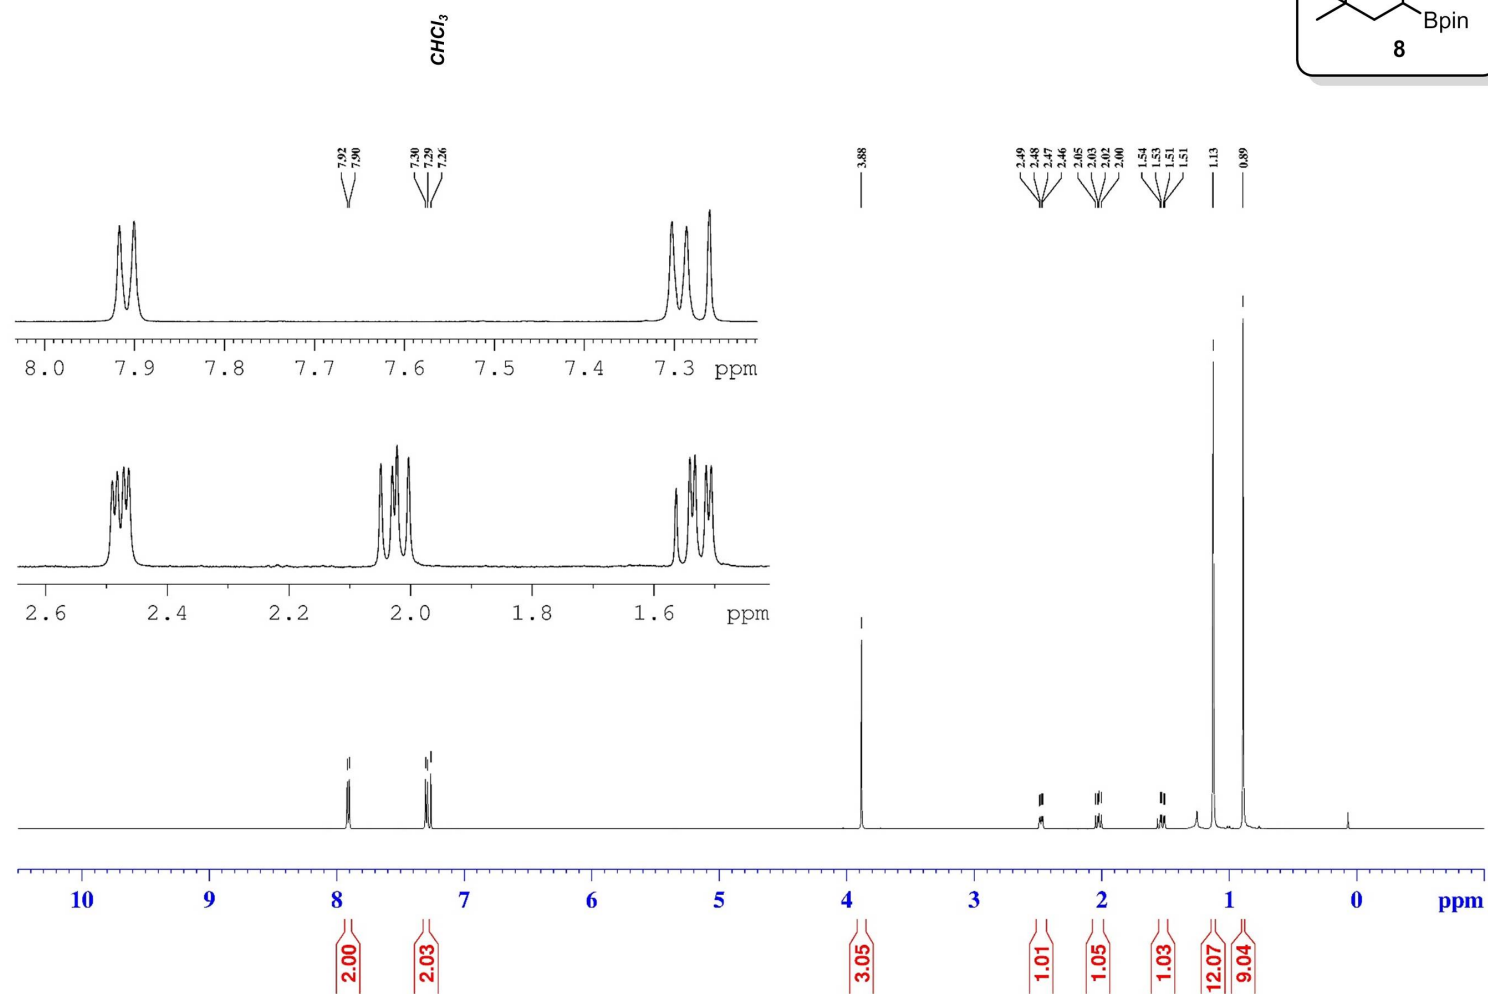

**<sup>13</sup>C NMR**

Methyl 4-(3,3-dimethyl-1-(4,4,5,5-tetramethyl-1,3,2-dioxaborolan-2-yl)butyl)benzoate  
125 MHz, CDCl<sub>3</sub>

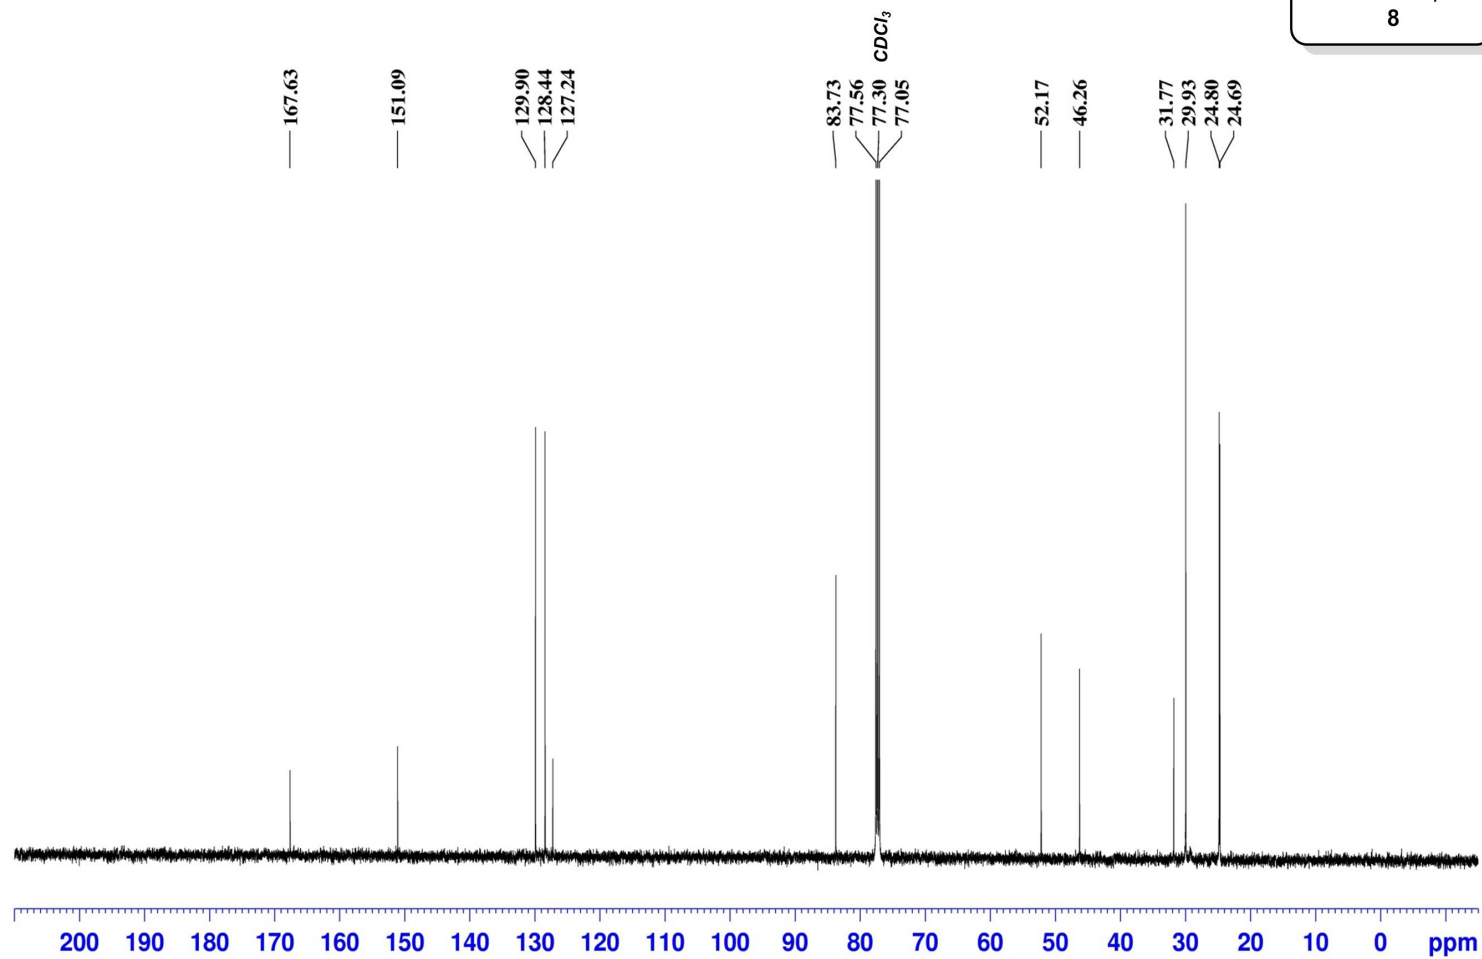



**<sup>11</sup>B NMR**

methyl 4-(3,3-dimethyl-1-(4,4,5,5-tetramethyl-1,3,2-dioxaborolan-2-yl)butyl)benzoate  
128 MHz, CDCl<sub>3</sub>

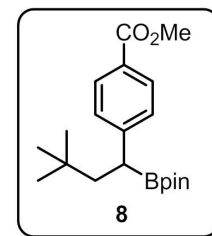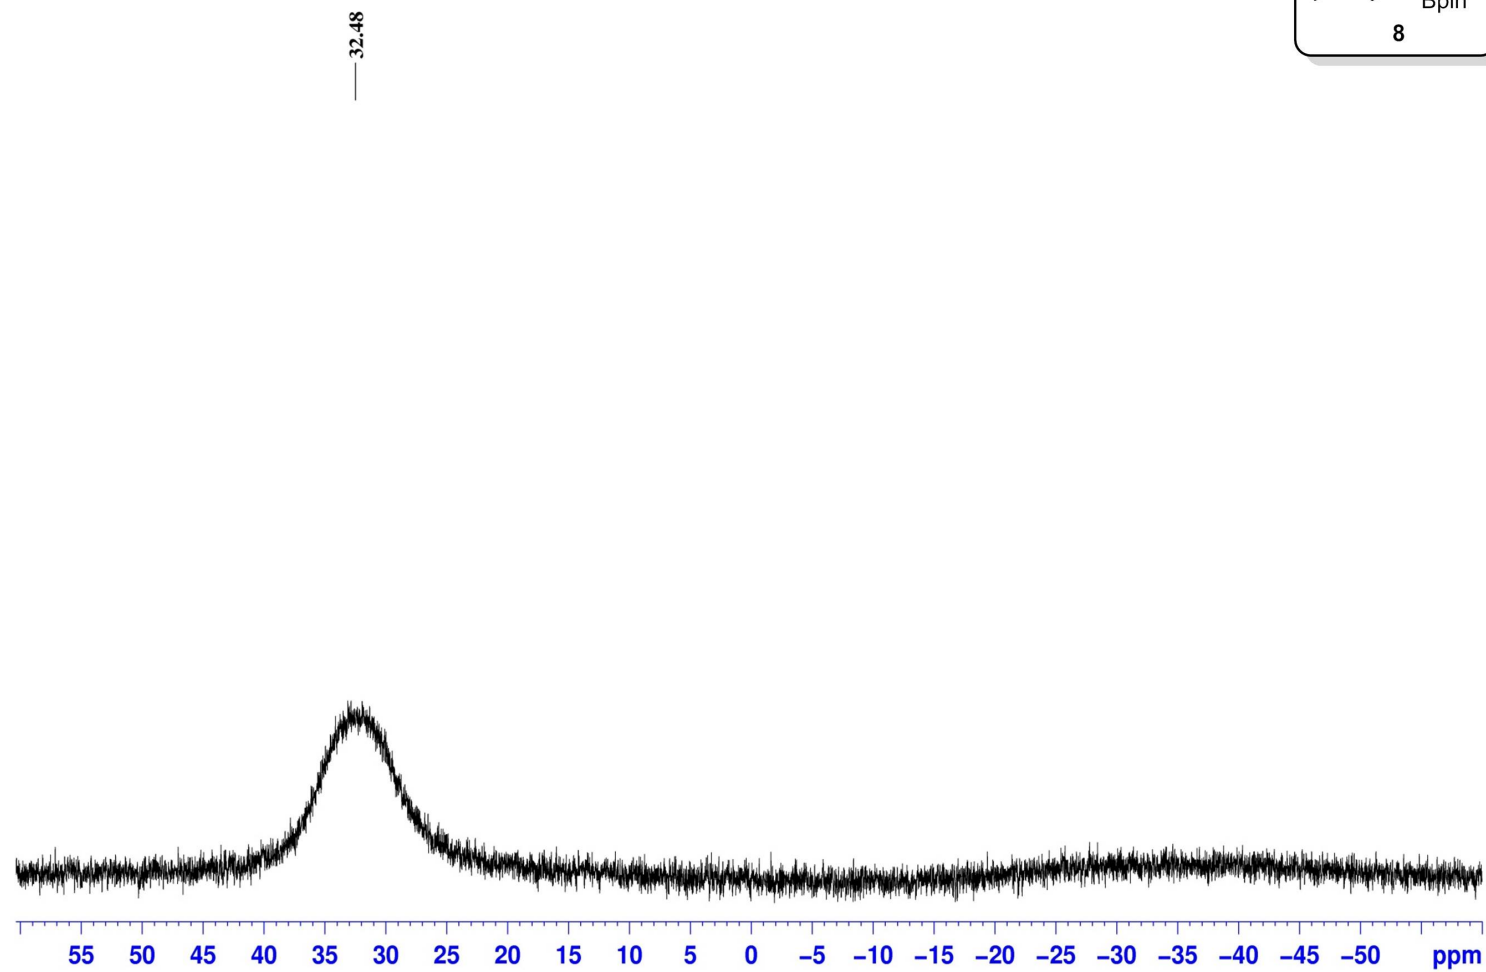

**<sup>1</sup>H NMR**  
2-(3,3-dimethyl-1-(4-(trifluoromethyl)phenyl)butyl)-4,4,5,5-tetramethyl-1,3,2-dioxaborolane  
500 MHz, CDCl<sub>3</sub>

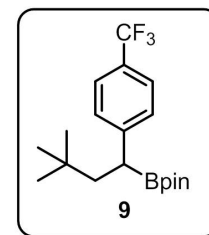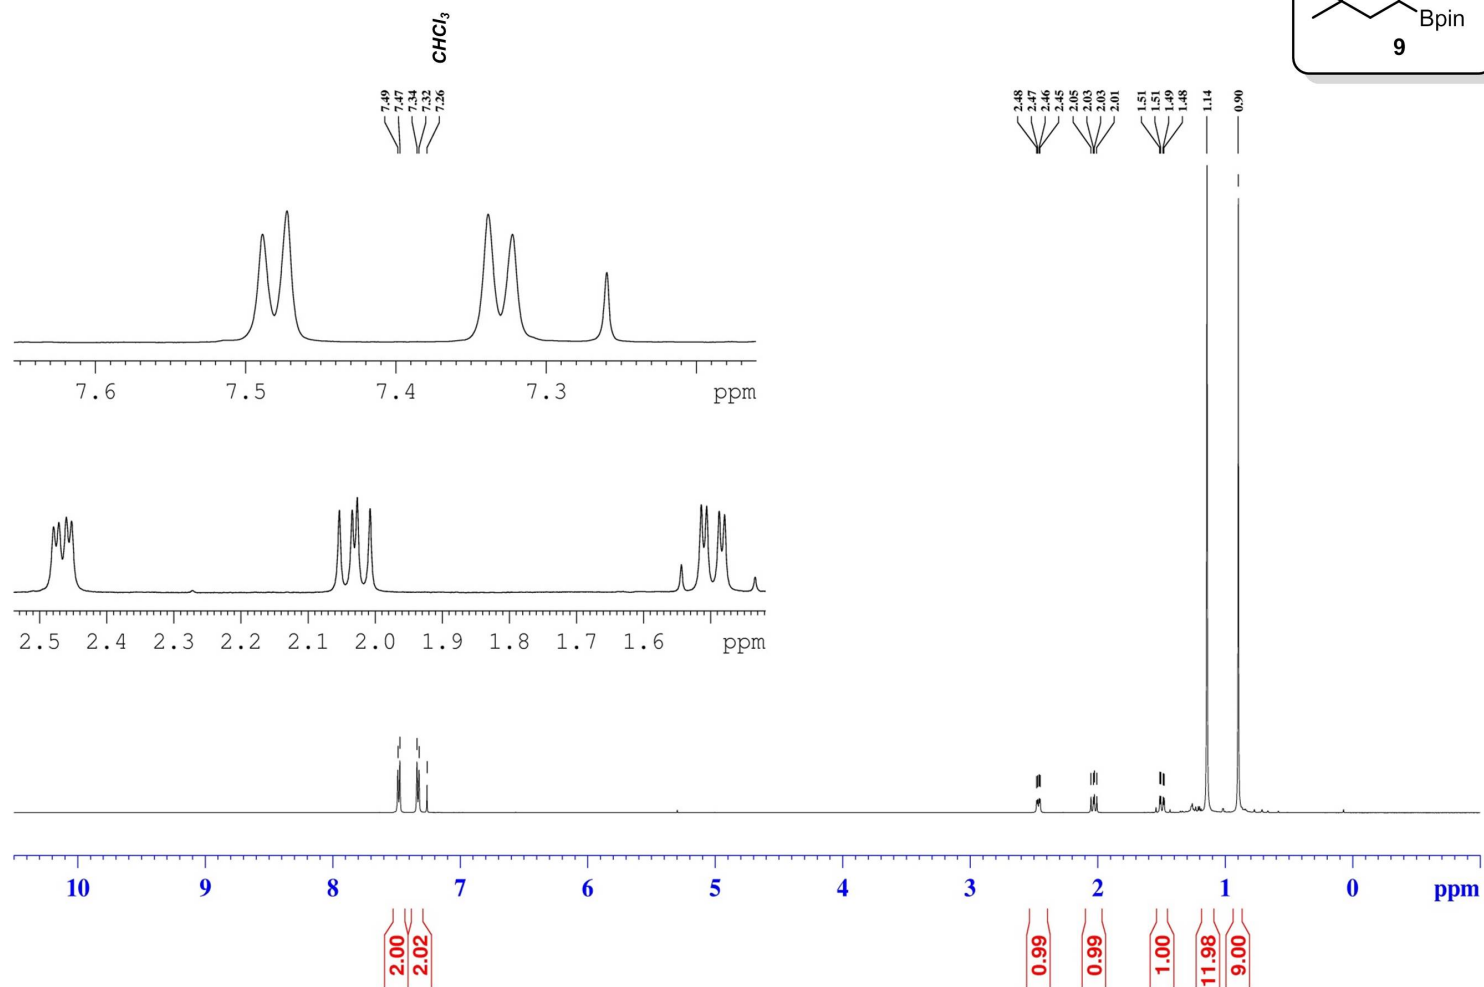

**<sup>13</sup>C NMR**

2-(3,3-Dimethyl-1-(4-(trifluoromethyl)phenyl)butyl)-4,4,5,5-tetramethyl-1,3,2-dioxaborolane  
125 MHz, CDCl<sub>3</sub>

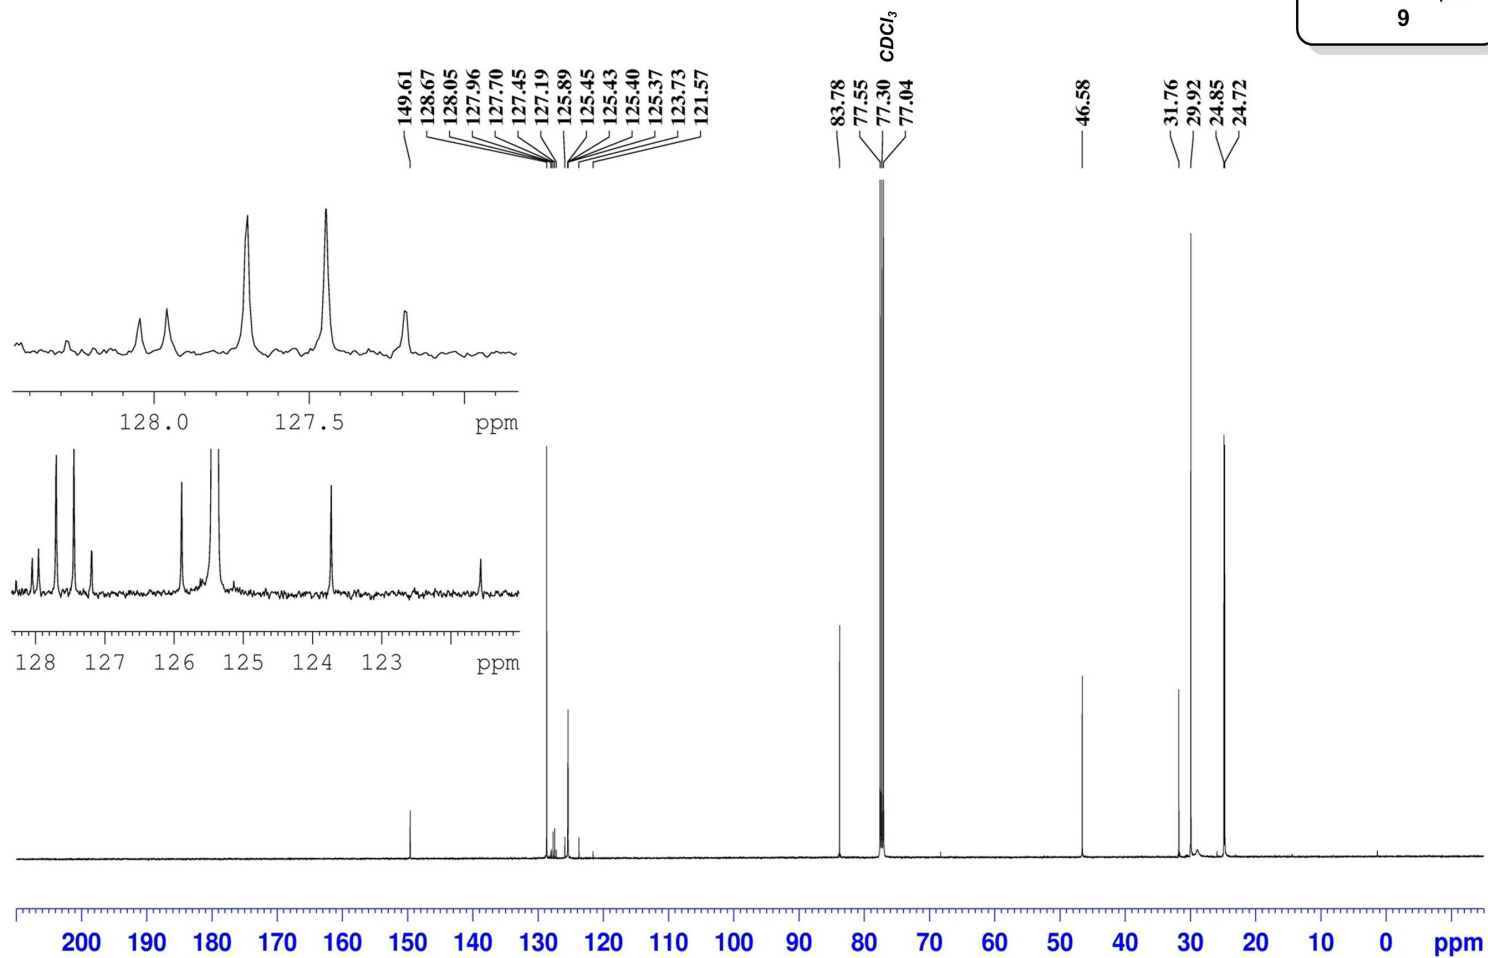

**<sup>19</sup>F NMR**

2-(3,3-dimethyl-1-(4-(trifluoromethyl)phenyl)butyl)-4,4,5,5-tetramethyl-1,3,2-dioxaborolane  
471 MHz, CDCl<sub>3</sub>

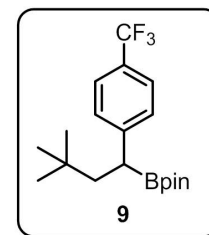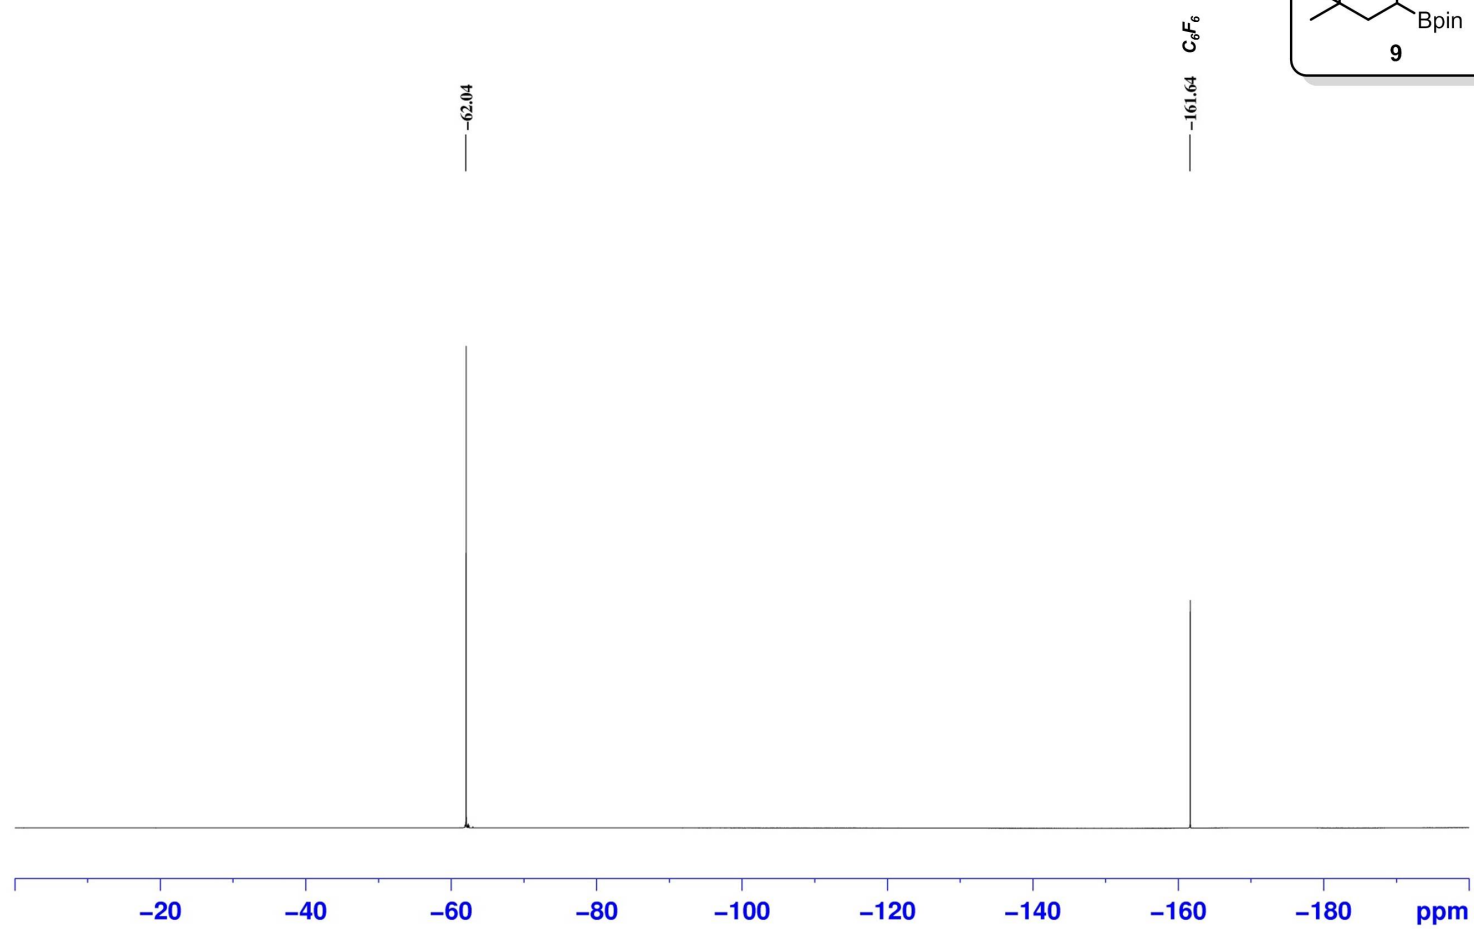

**<sup>11</sup>B NMR**

2-(3,3-dimethyl-1-(4-(trifluoromethyl)phenyl)butyl)-4,4,5,5-tetramethyl-1,3,2-dioxaborolane  
128 MHz, CDCl<sub>3</sub>

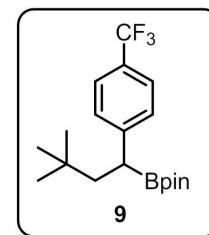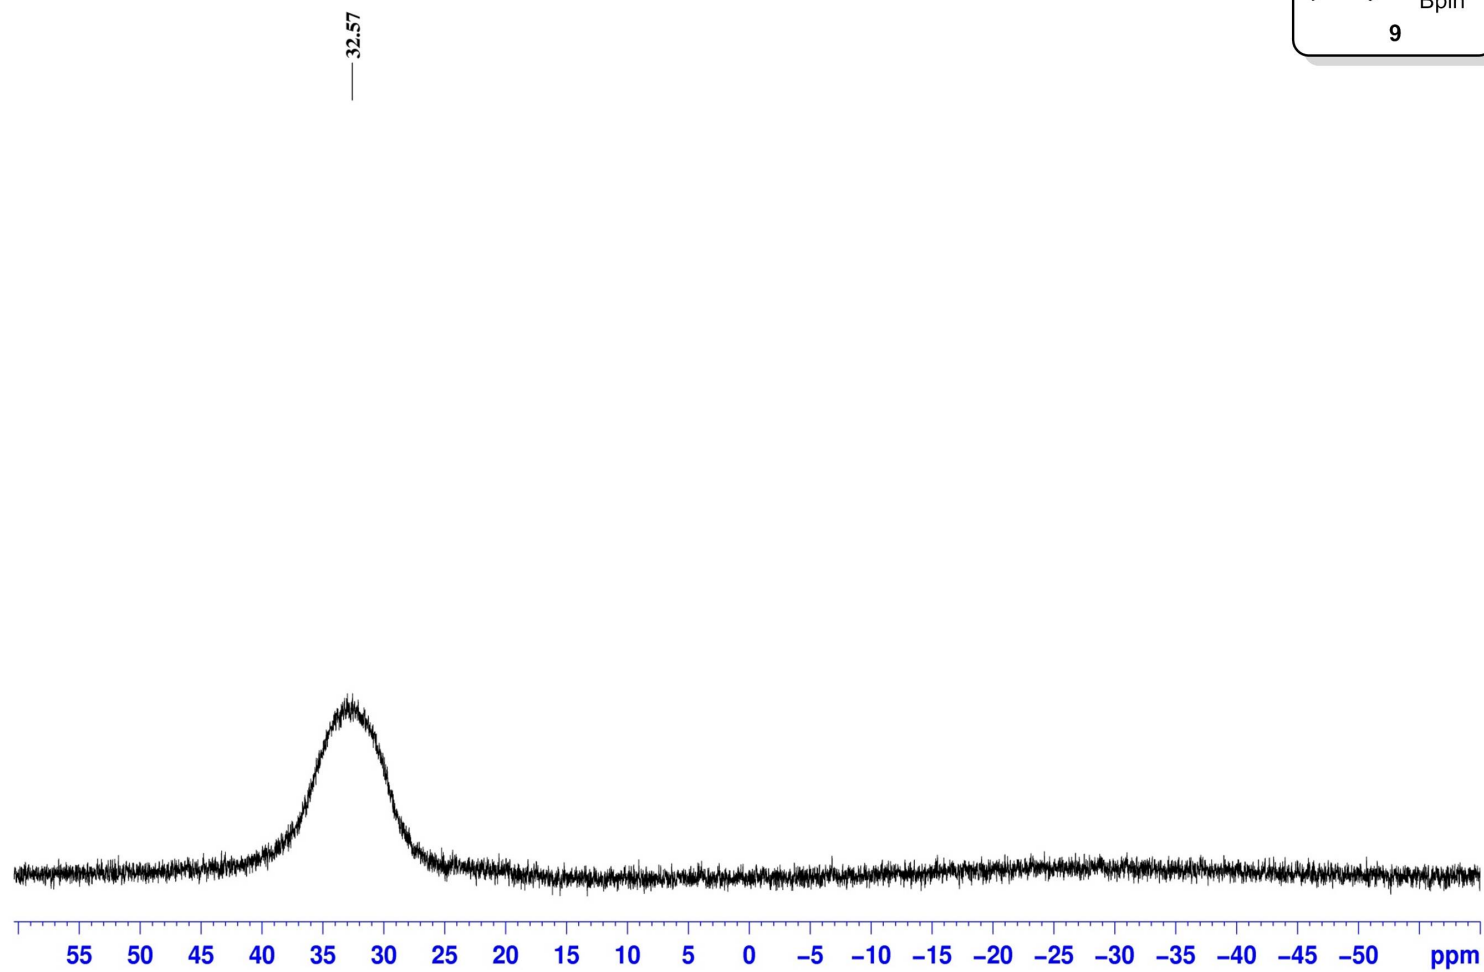

**<sup>1</sup>H NMR**

2-(1-(4-methoxyphenyl)-3,3-dimethylbutyl)-4,4,5,5-tetramethyl-1,3,2-dioxaborolane  
500 MHz, CDCl<sub>3</sub>

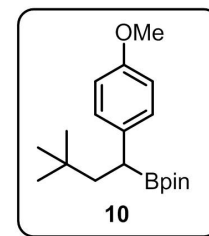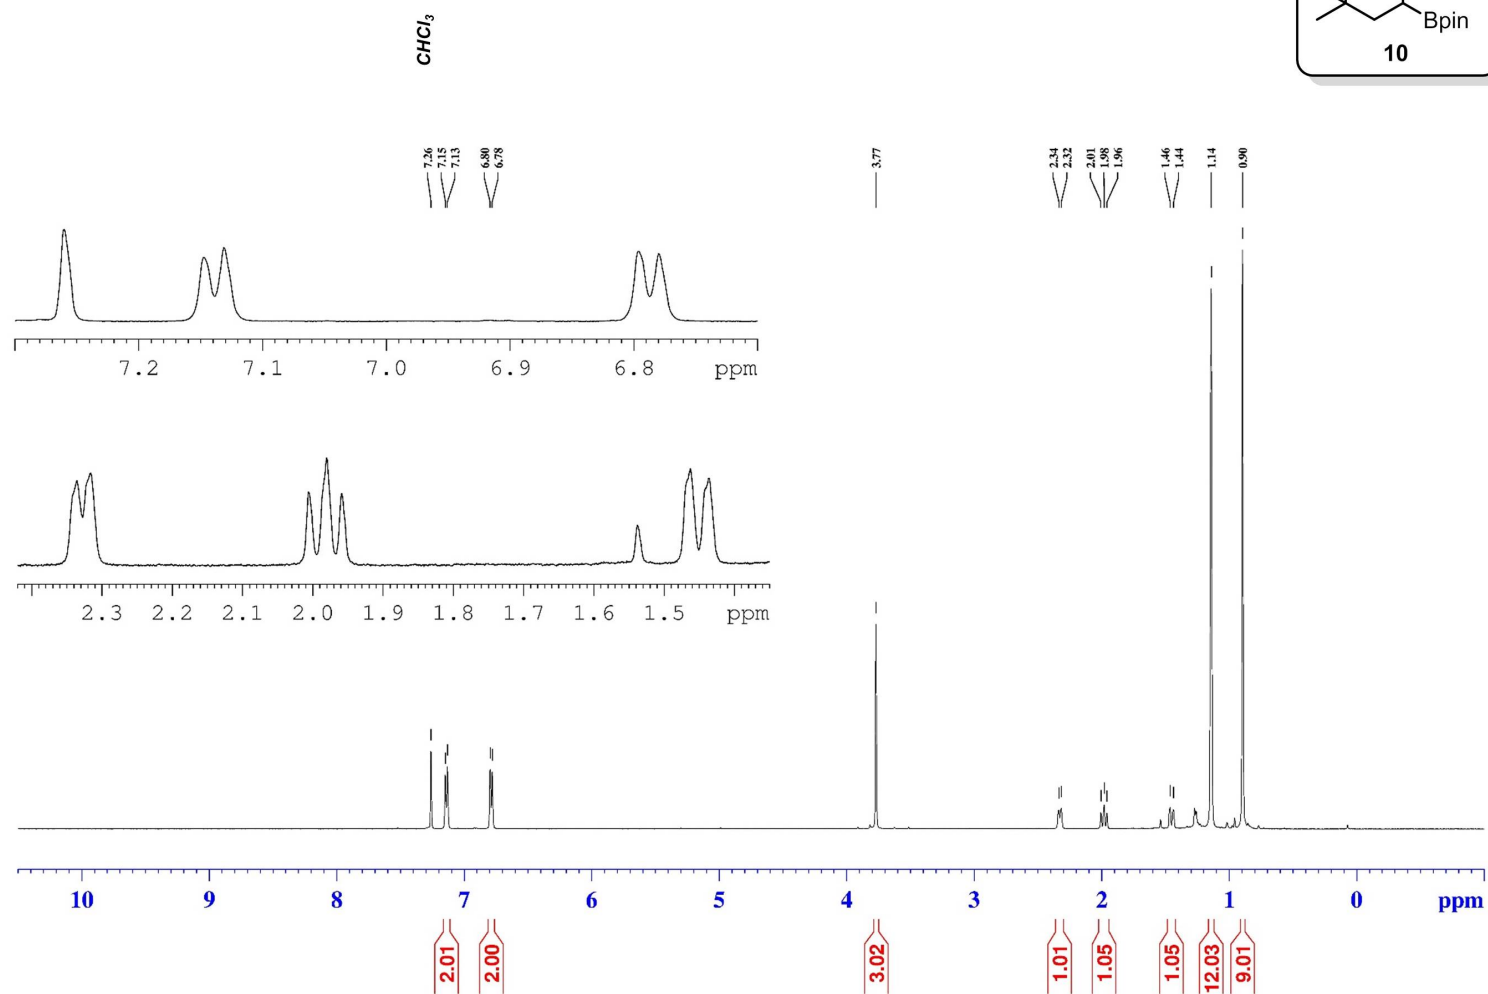

**<sup>13</sup>C NMR**

2-(1-(4-Methoxyphenyl)-3,3-dimethylbutyl)-4,4,5,5-tetramethyl-1,3,2-dioxaborolane  
125 MHz, CDCl<sub>3</sub>

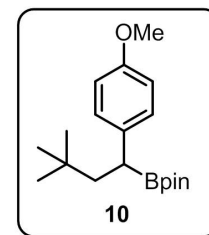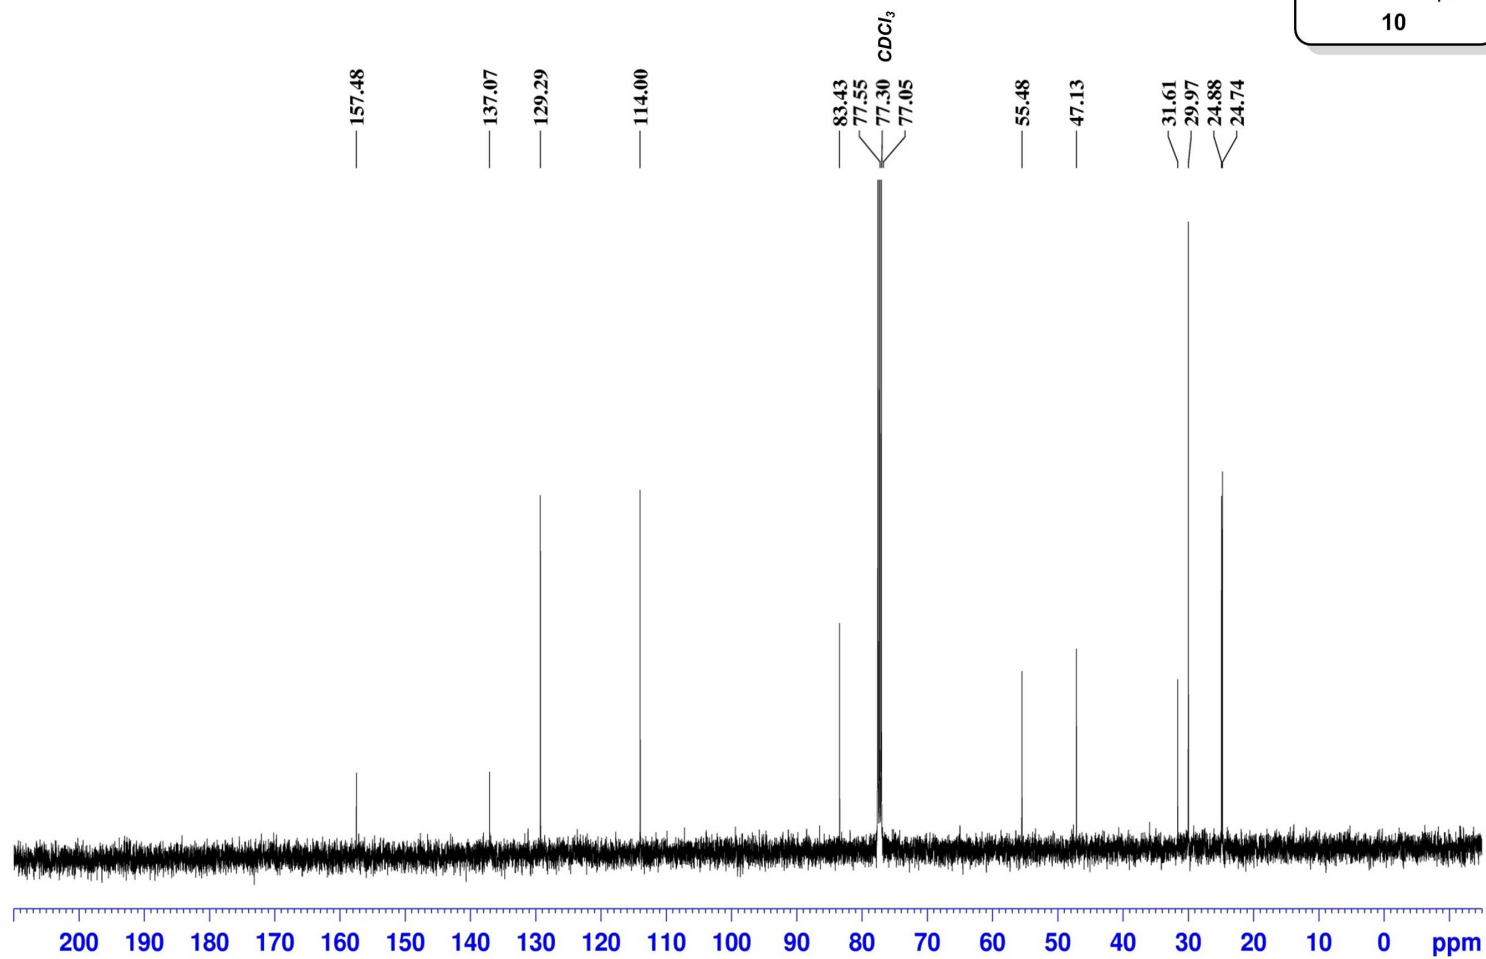

**<sup>11</sup>B NMR**

2-(1-(4-methoxyphenyl)-3,3-dimethylbutyl)-4,4,5,5-tetramethyl-1,3,2-dioxaborolane  
128 MHz, CDCl<sub>3</sub>

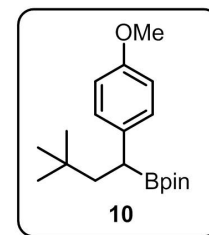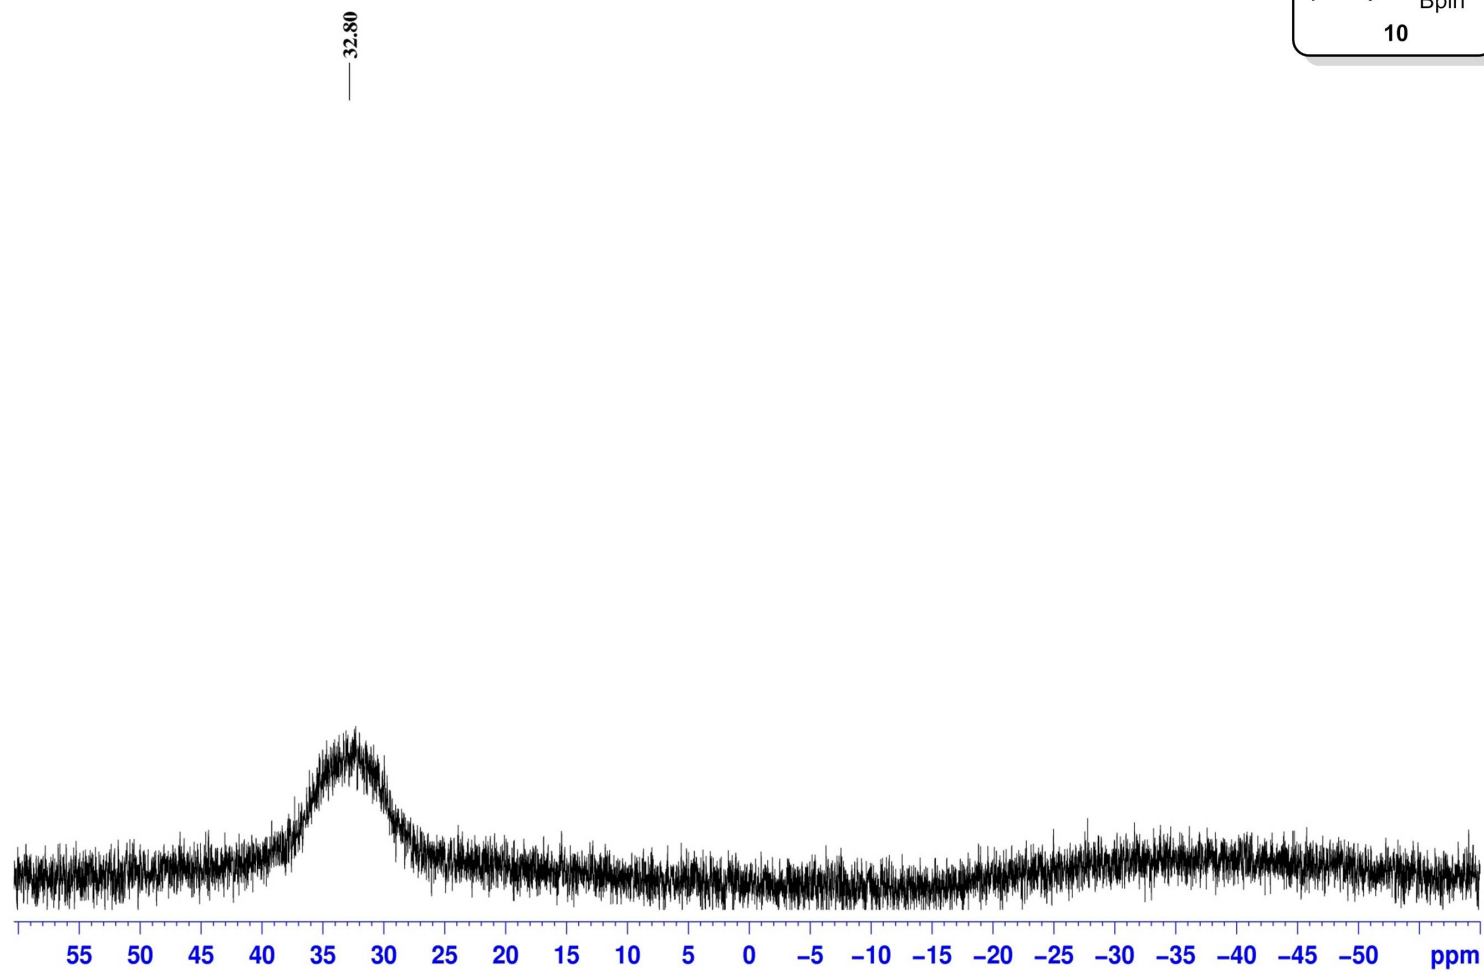



# <sup>1</sup>H NMR

2-(1-([1,1'-biphenyl]-4-yl)-3,3-dimethylbutyl)-4,4,5,5-tetramethyl-1,3,2-dioxaborolane  
500 MHz, CDCl<sub>3</sub>

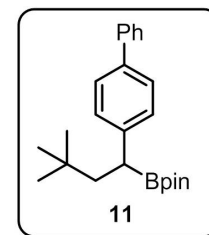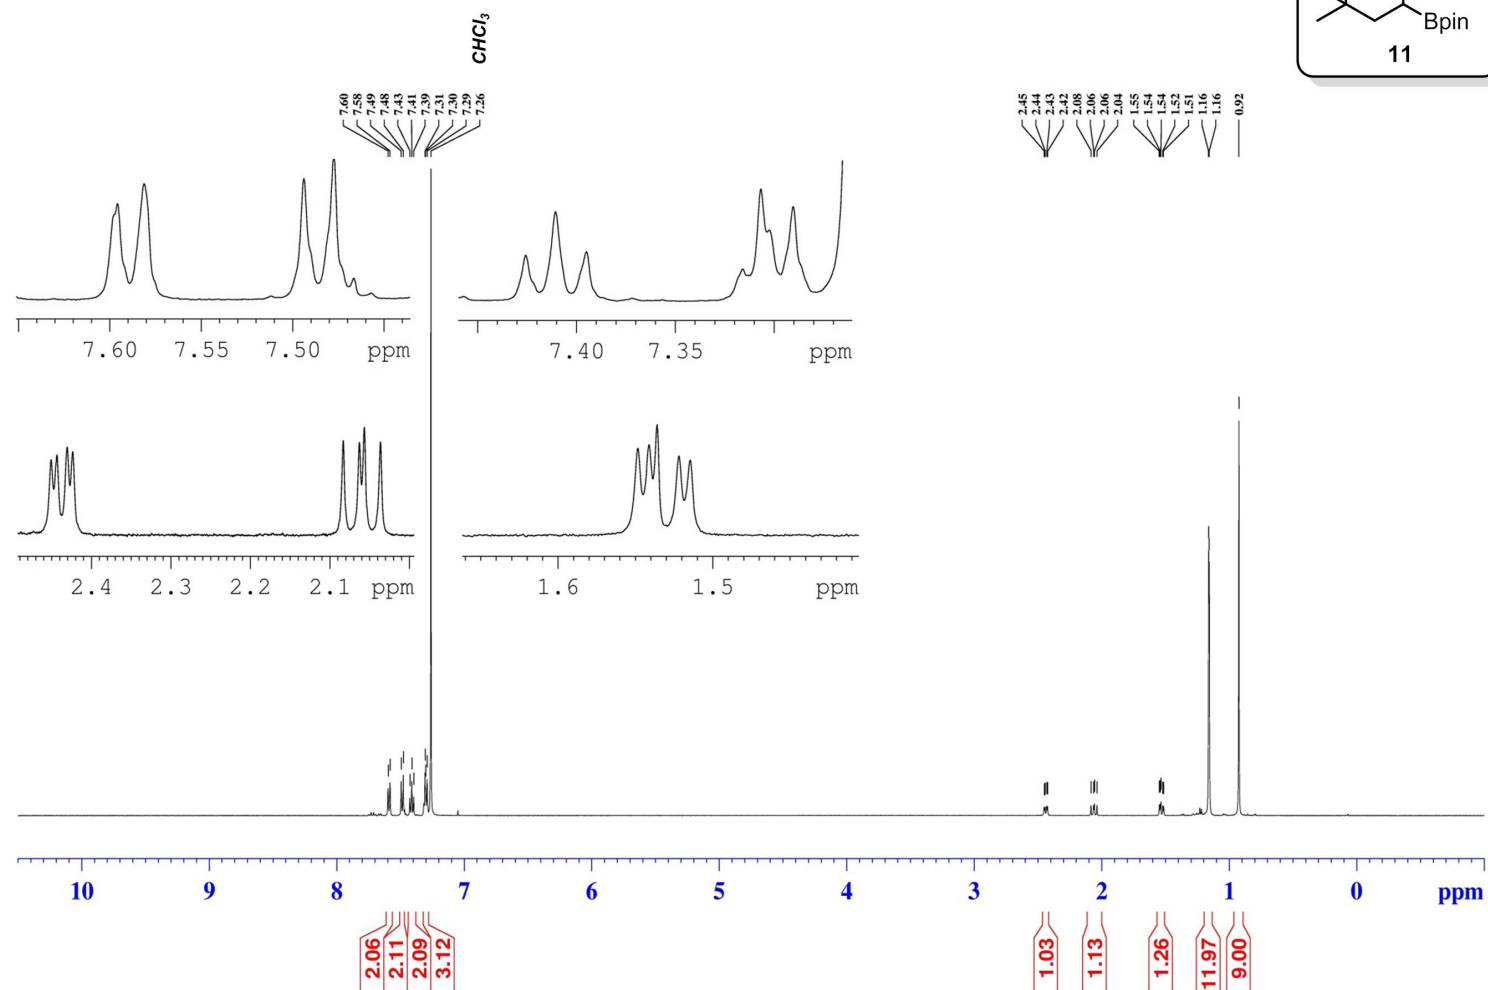

**<sup>13</sup>C NMR**

2-(1-([1,1'-Biphenyl]-4-yl)-3,3-dimethylbutyl)-4,4,5,5-tetramethyl-1,3,2-dioxaborolane  
125 MHz, CDCl<sub>3</sub>

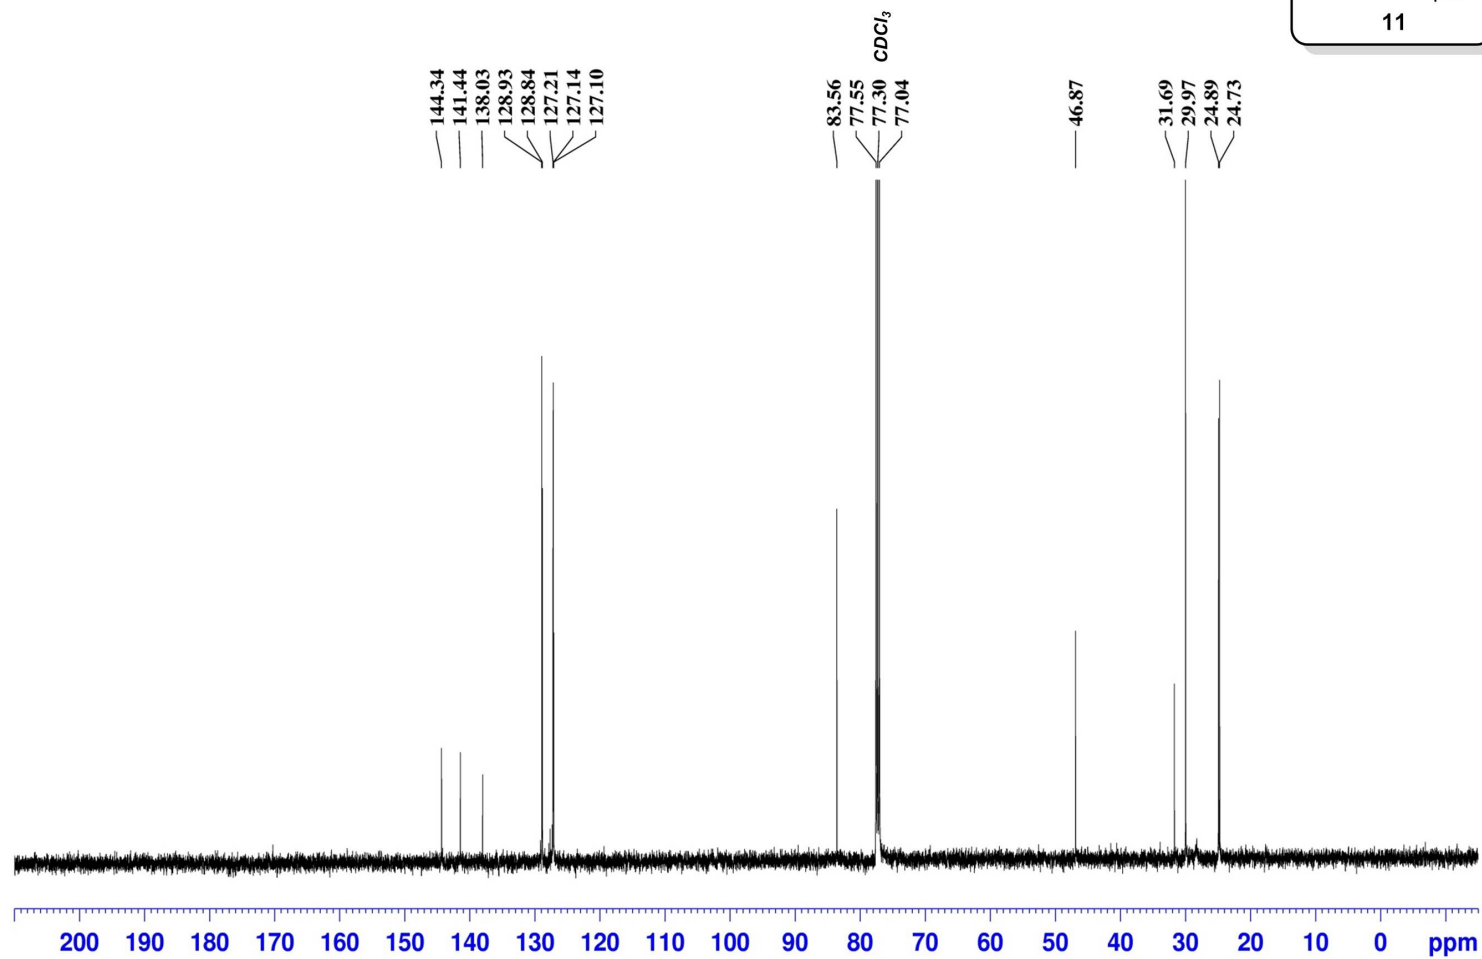

**<sup>11</sup>B NMR**

2-(1-([1,1'-biphenyl]-4-yl)-3,3-dimethylbutyl)-4,4,5,5-tetramethyl-1,3,2-dioxaborolane  
128 MHz, CDCl<sub>3</sub>

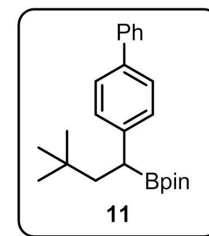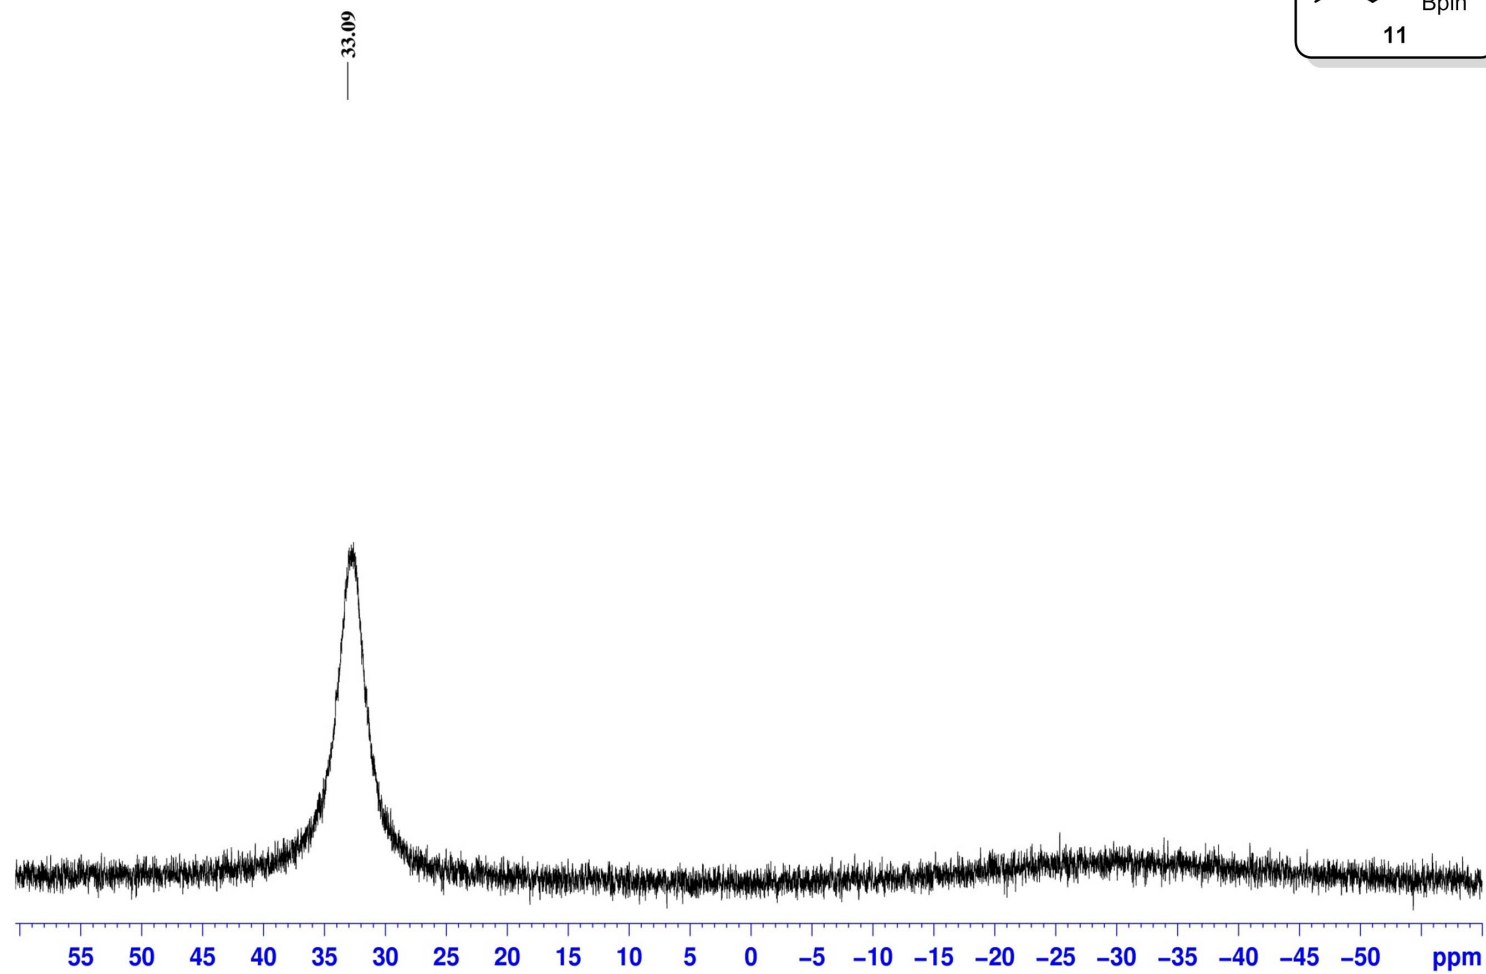

**<sup>1</sup>H NMR**  
2-(3,3-dimethyl-1-(4-(methylsulfonyl)phenyl)butyl)-4,4,5,5-tetramethyl-1,3,2-dioxaborolane  
500 MHz, CDCl<sub>3</sub>

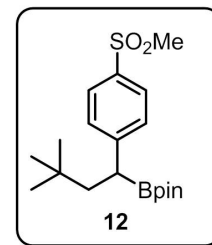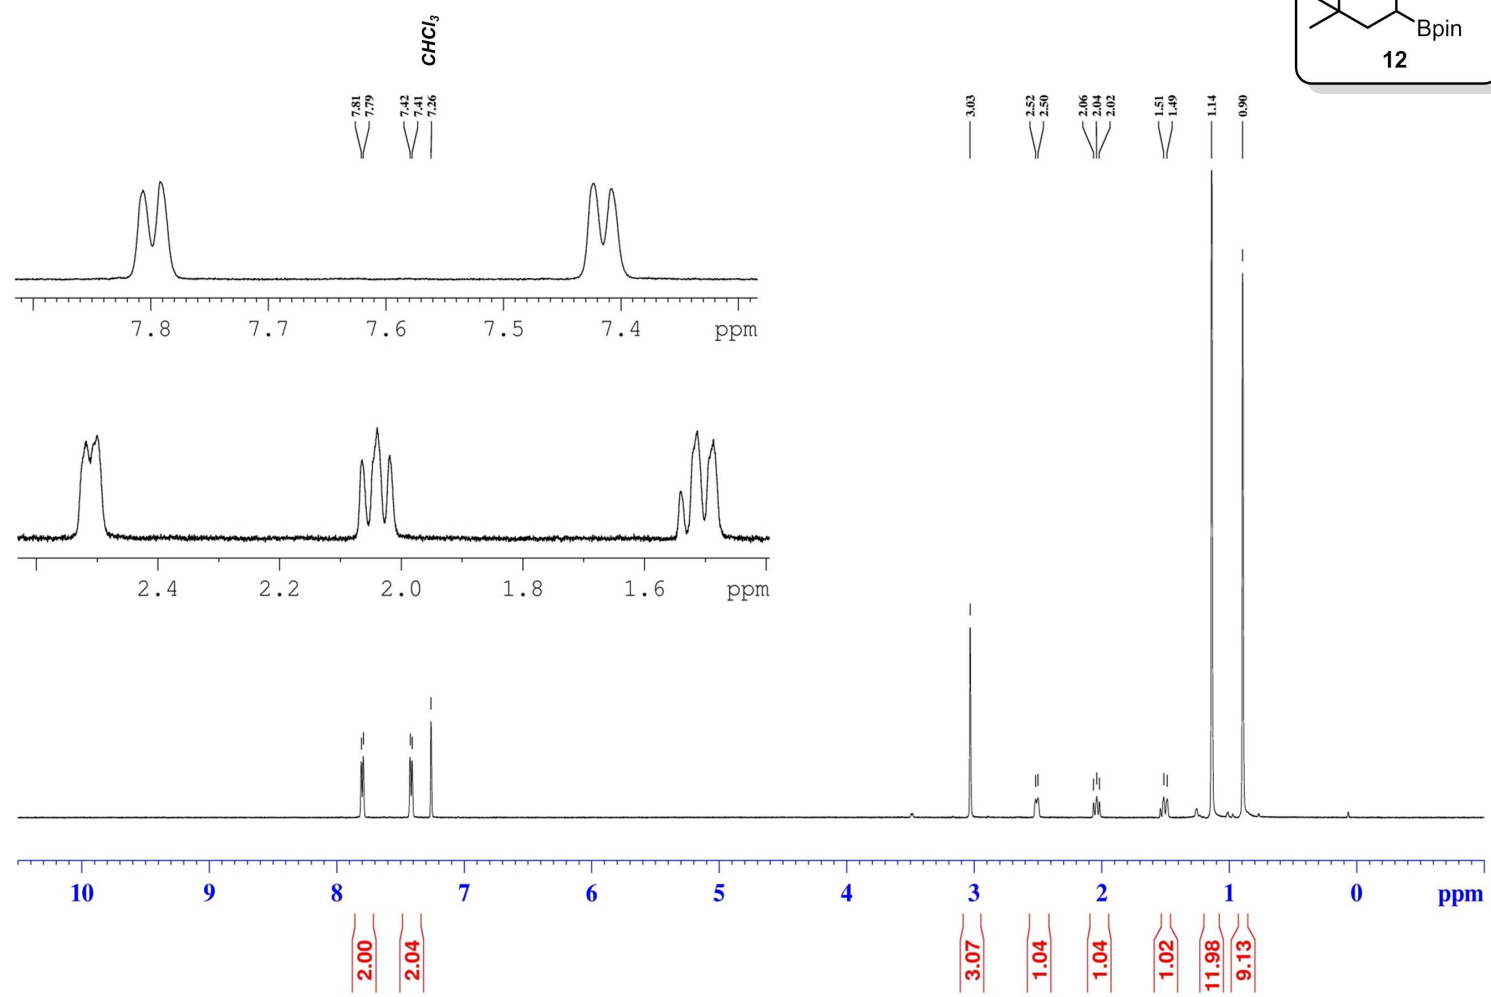

**<sup>13</sup>C NMR**

2-(3,3-Dimethyl-1-(4-(methylsulfonyl)phenyl)butyl)-4,4,5,5-tetramethyl-1,3,2-dioxaborolane  
125 MHz, CDCl<sub>3</sub>

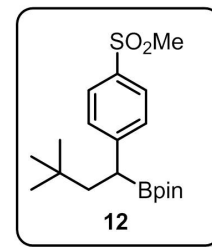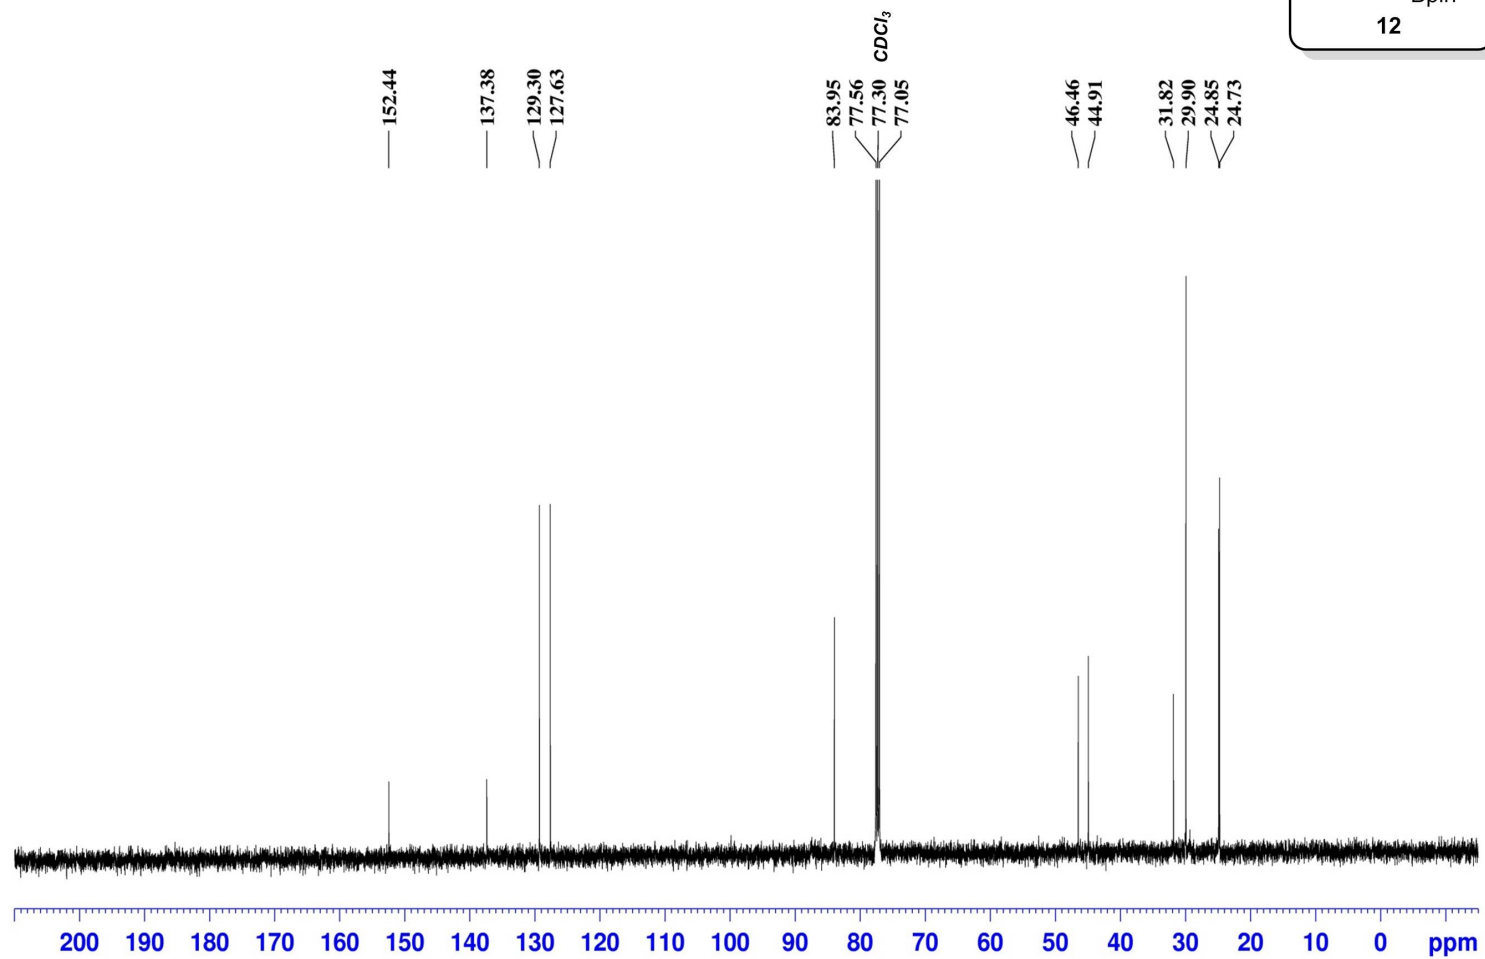

**<sup>11</sup>B NMR**

2-(3,3-dimethyl-1-(4-(methylsulfonyl)phenyl)butyl)-4,4,5,5-tetramethyl-1,3,2-dioxaborolane  
128 MHz, CDCl<sub>3</sub>

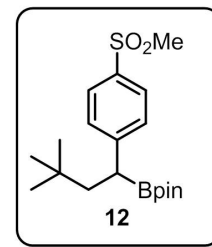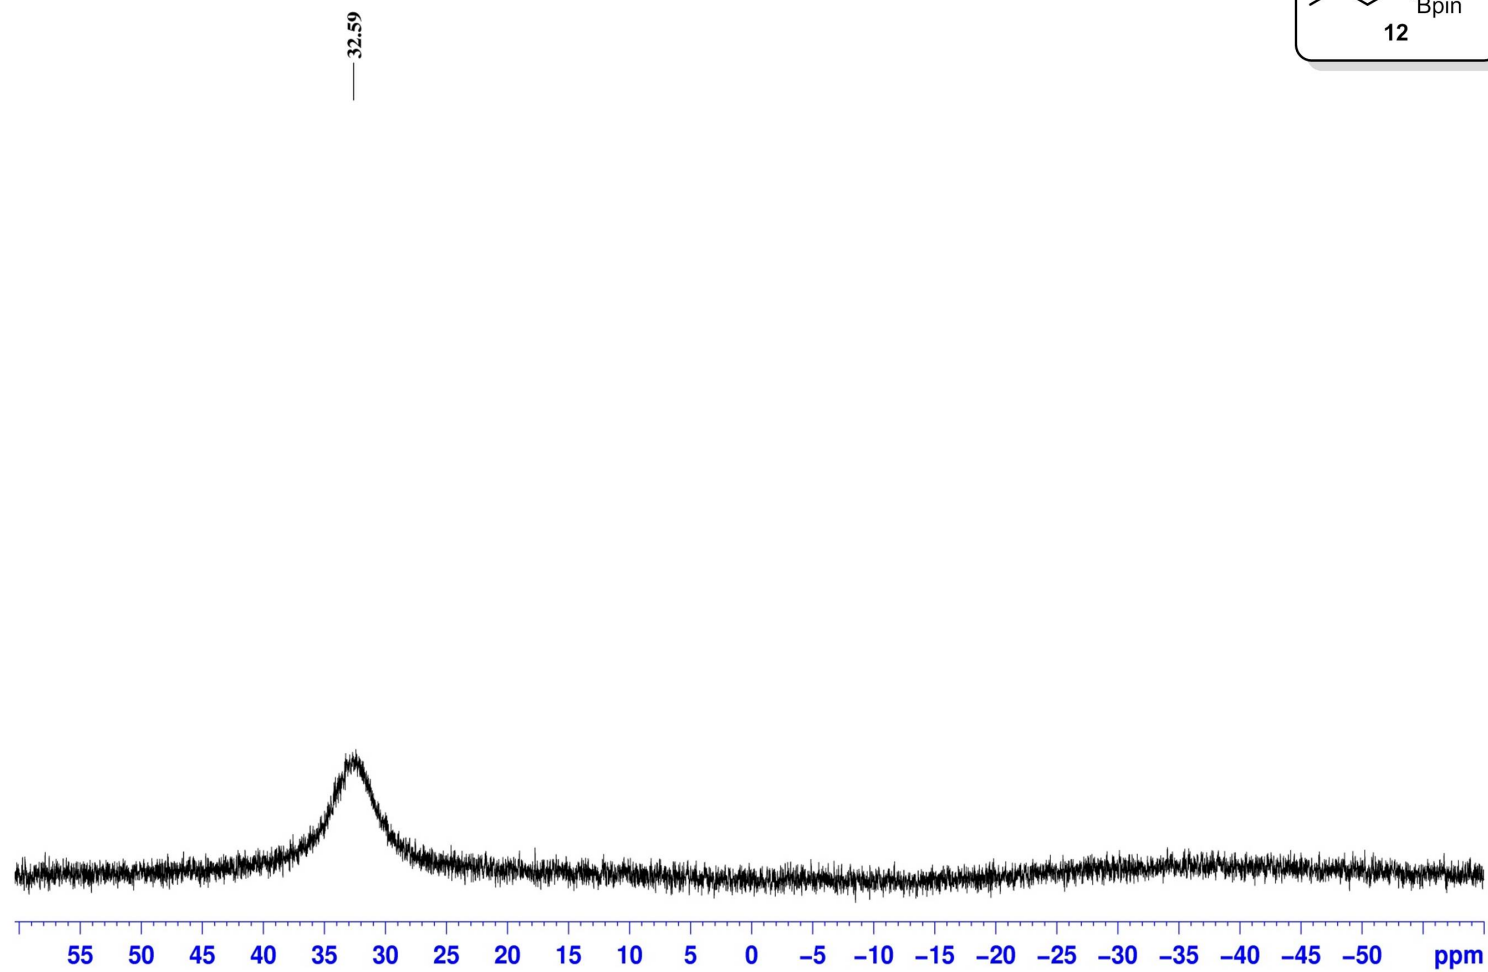

# <sup>1</sup>H NMR

(4-(3,3-dimethyl-1-(4,4,5,5-tetramethyl-1,3,2-dioxaborolan-2-yl)butyl)phenyl)methanol  
500 MHz, CDCl<sub>3</sub>

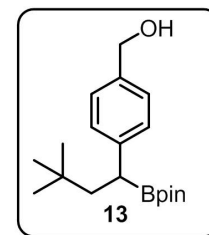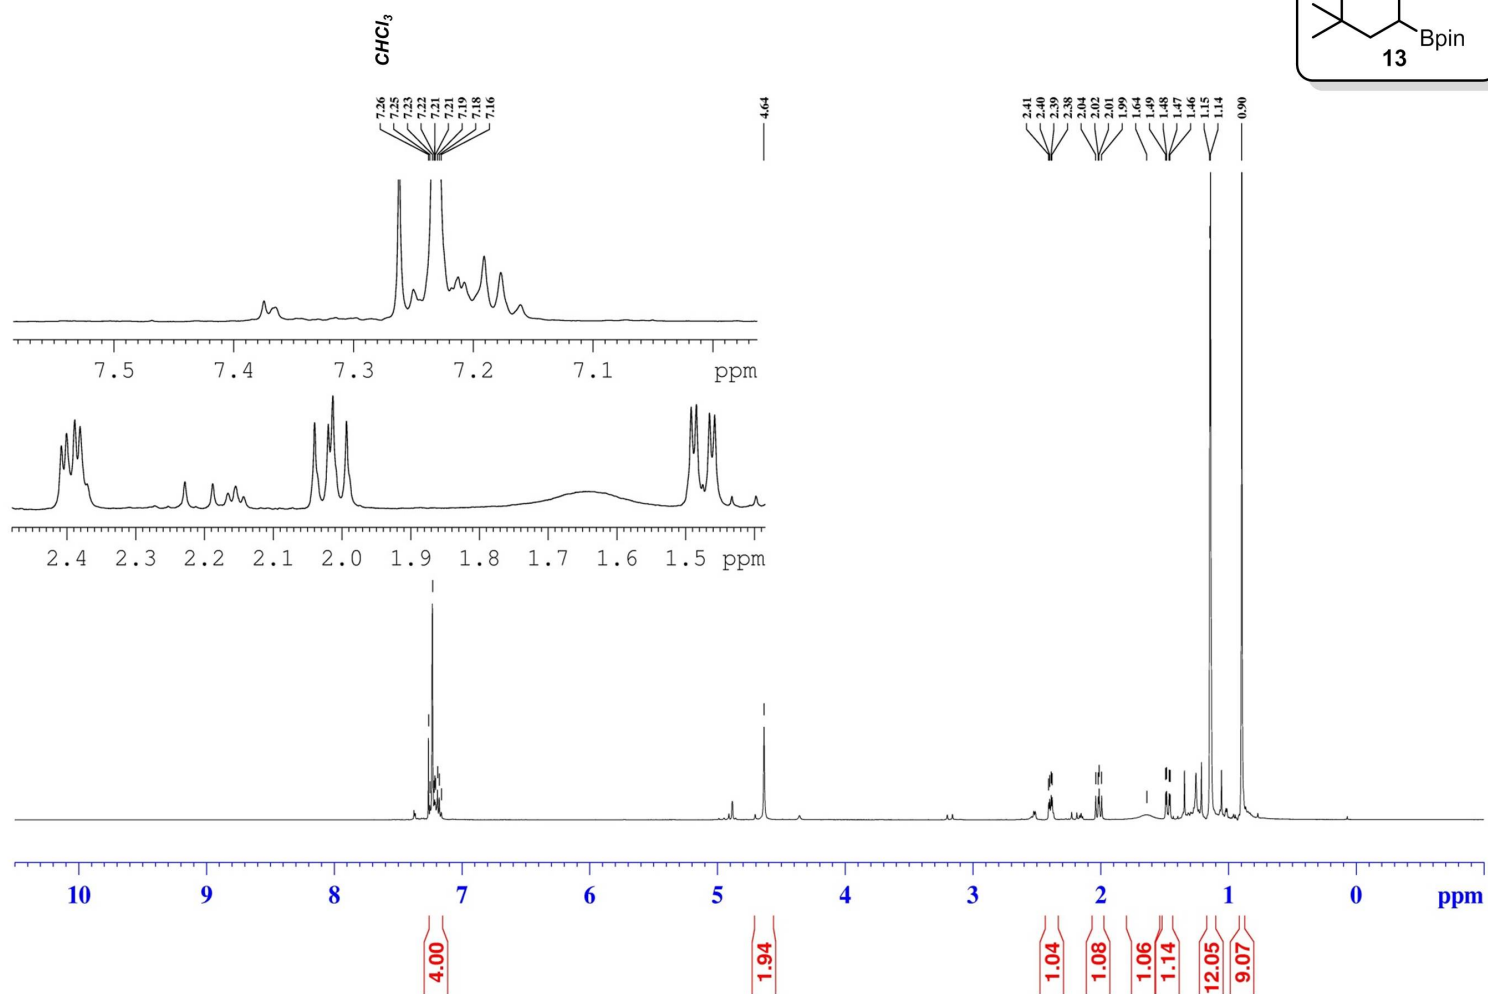

**<sup>13</sup>C NMR**

(4-(3,3-Dimethyl-1-(4,4,5,5-tetramethyl-1,3,2-dioxaborolan-2-yl)butyl)phenyl)methanol  
125 MHz, CDCl<sub>3</sub>

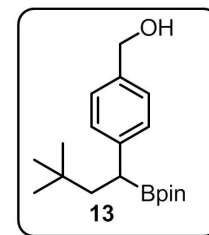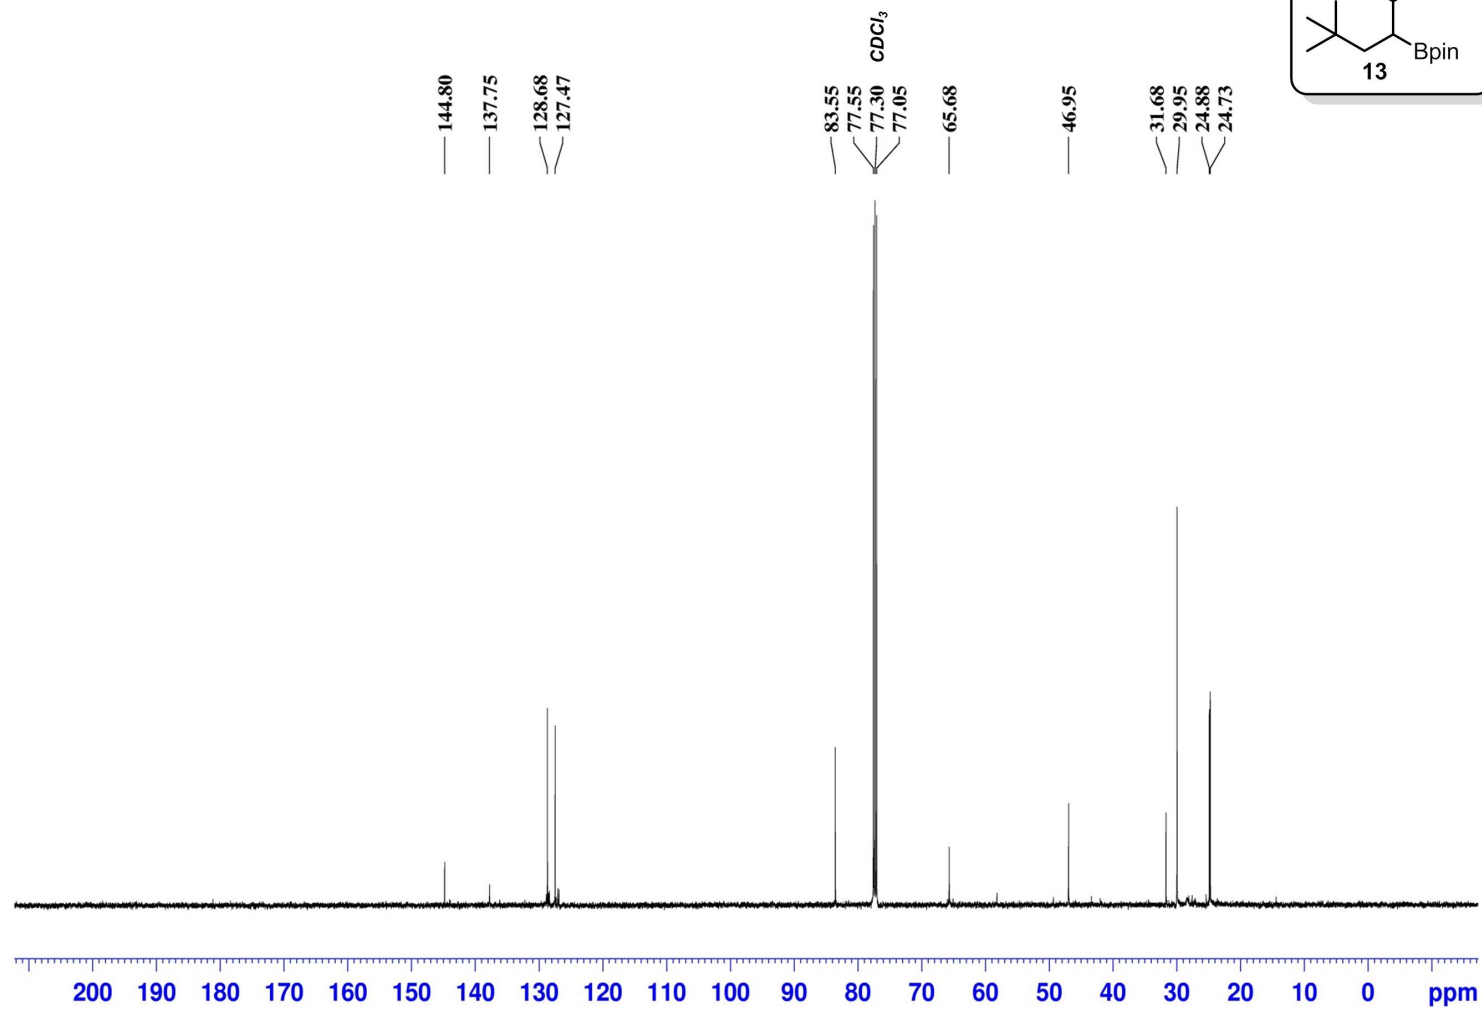



**<sup>11</sup>B NMR**

(4-(3,3-dimethyl-1-(4,4,5,5-tetramethyl-1,3,2-dioxaborolan-2-yl)butyl)phenyl)methanol  
128 MHz, CDCl<sub>3</sub>

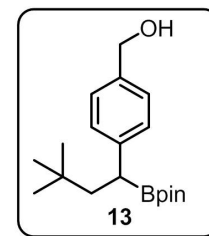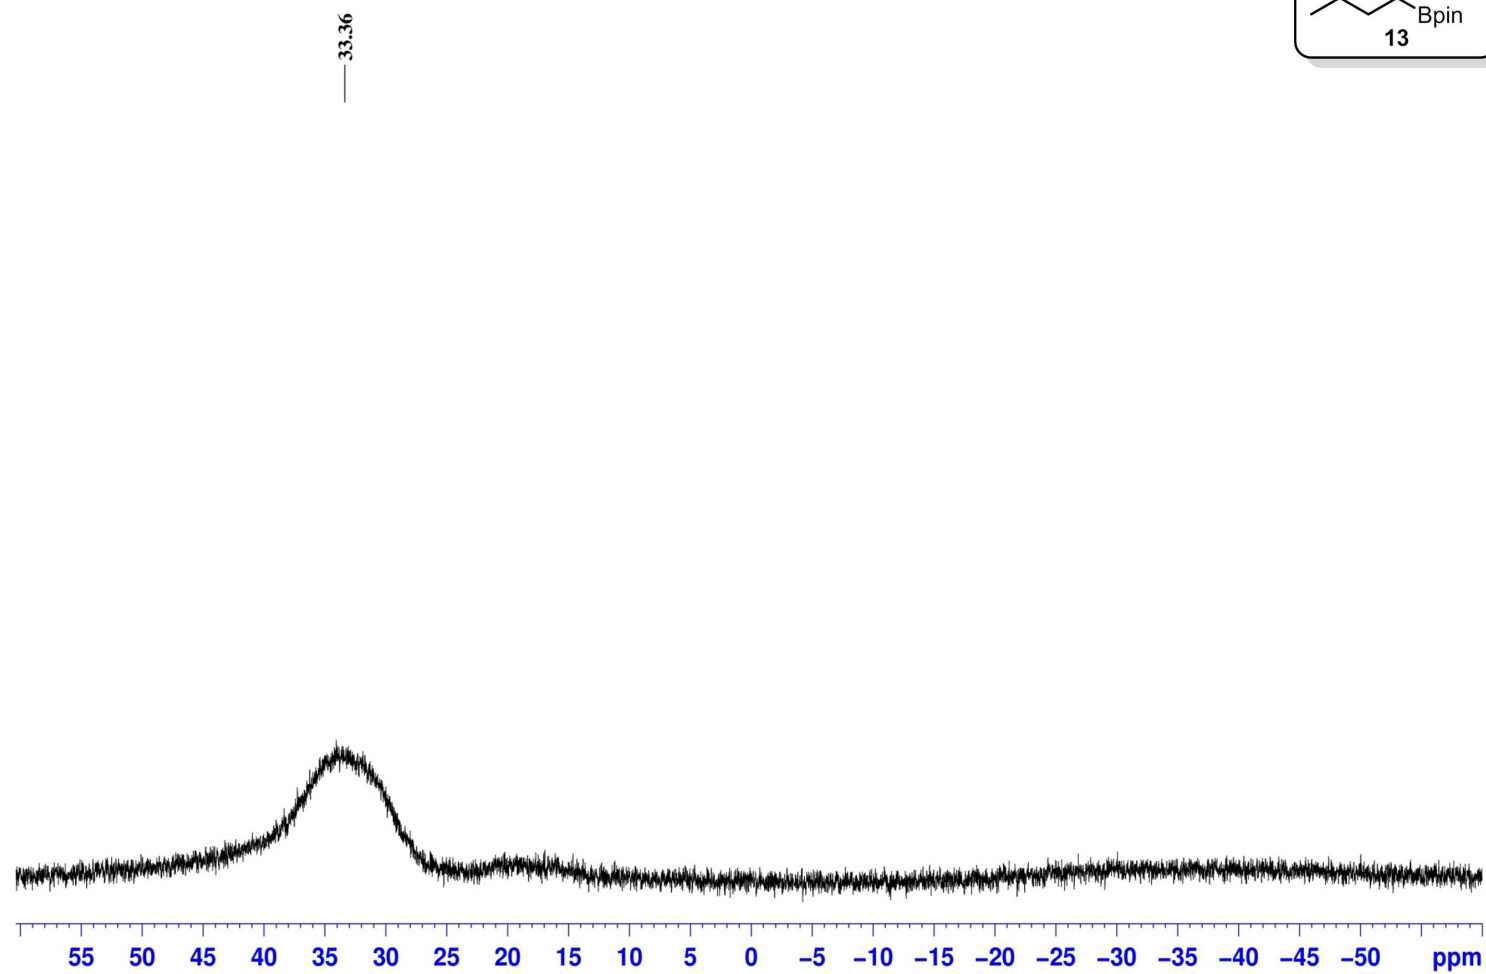

# <sup>1</sup>H NMR

4-((4-(3,3-dimethyl-1-(4,4,5,5-tetramethyl-1,3,2-dioxaborolan-2-yl)butyl)phenyl)sulfonyl)morpholine  
500 MHz, CDCl<sub>3</sub>

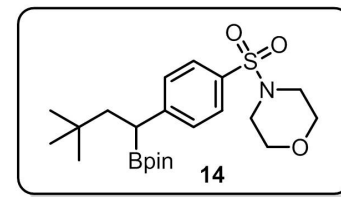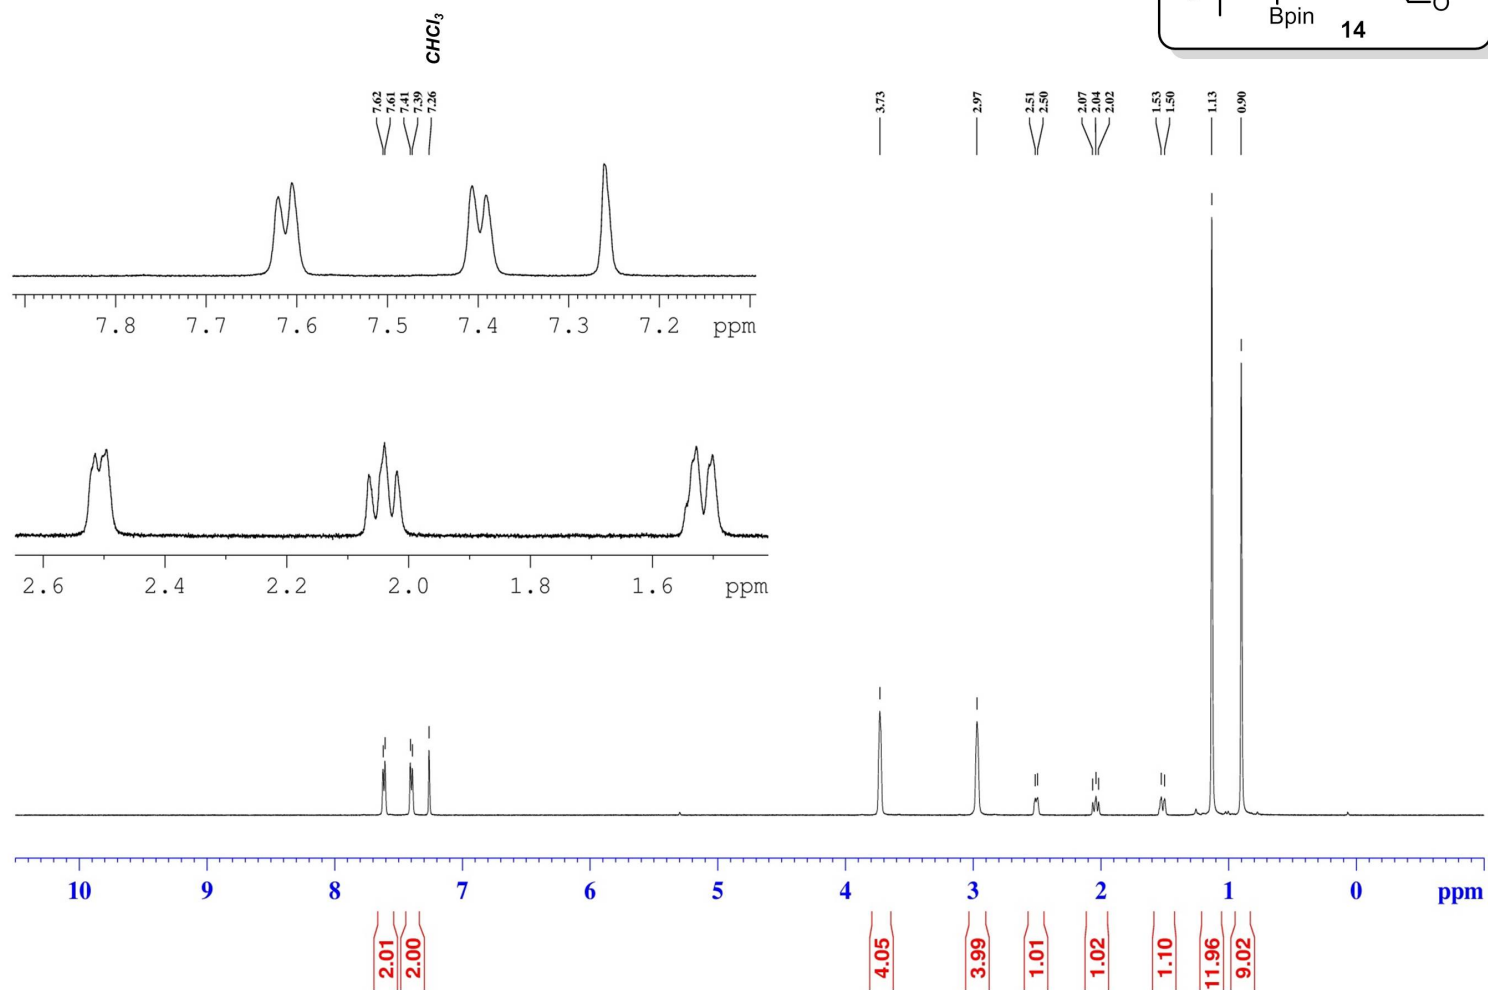

**<sup>13</sup>C NMR**

4-((4-(3,3-Dimethyl-1-(4,4,5,5-tetramethyl-1,3,2-dioxaborolan-2-yl)butyl)phenyl)sulfonyl)morpholine  
125 MHz, CDCl<sub>3</sub>

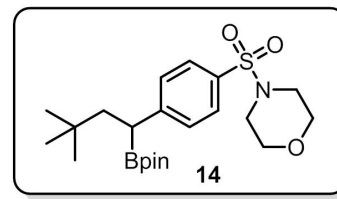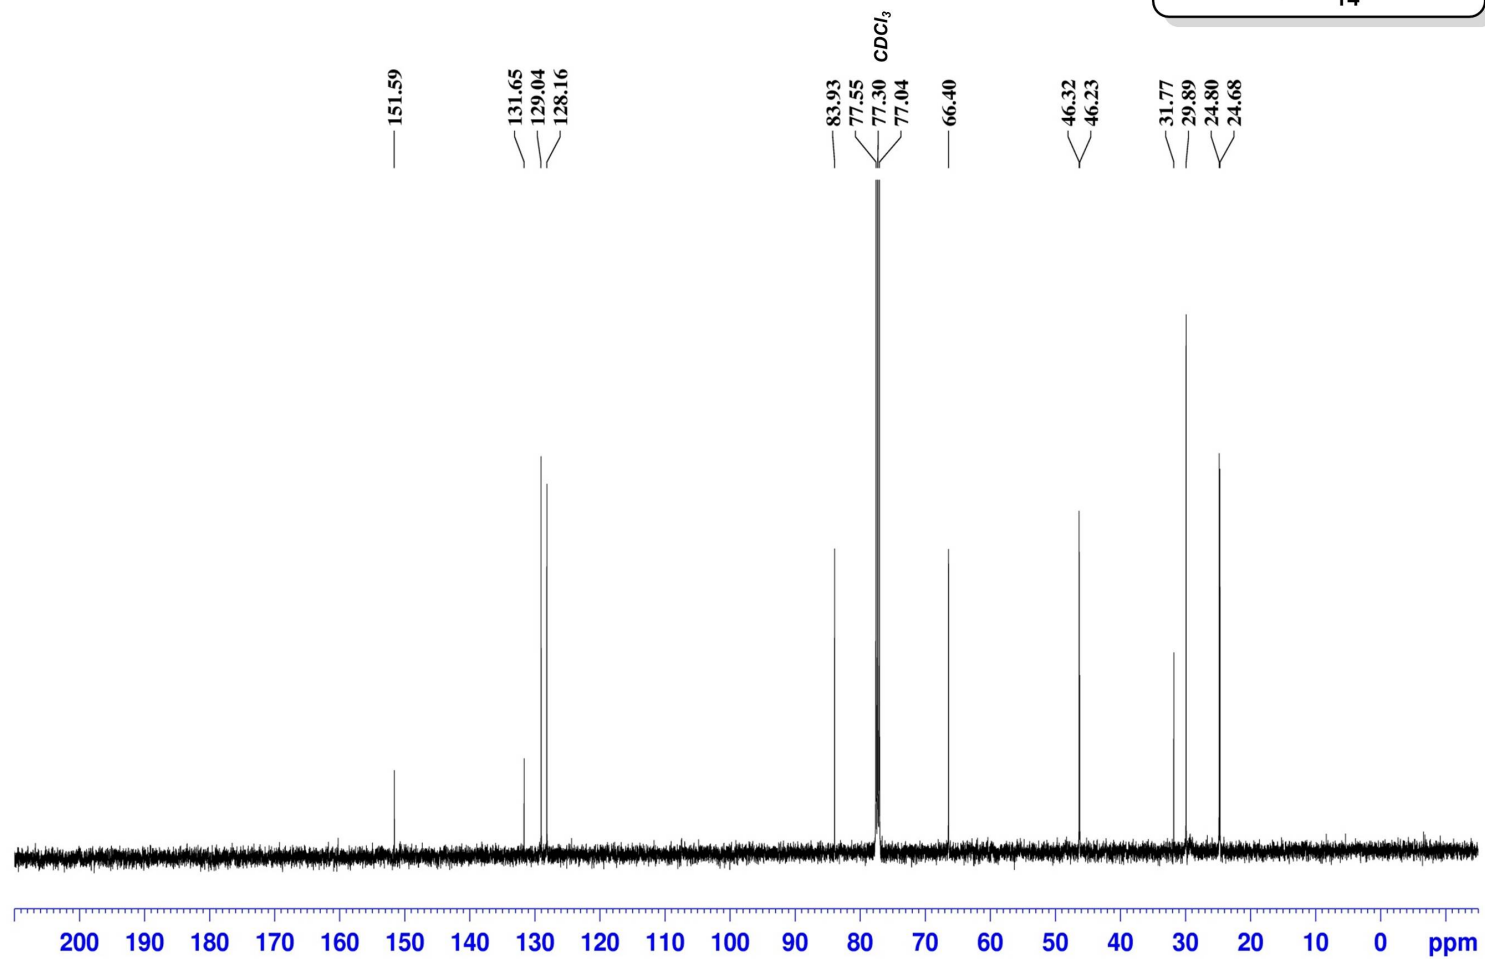

**<sup>11</sup>B NMR**

4-((4-(3,3-dimethyl-1-(4,4,5,5-tetramethyl-1,3,2-dioxaborolan-2-yl)butyl)phenyl)sulfonyl)morpholine  
128 MHz, CDCl<sub>3</sub>

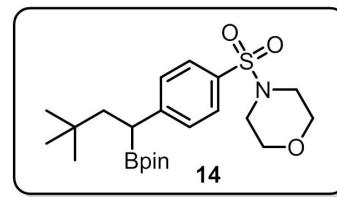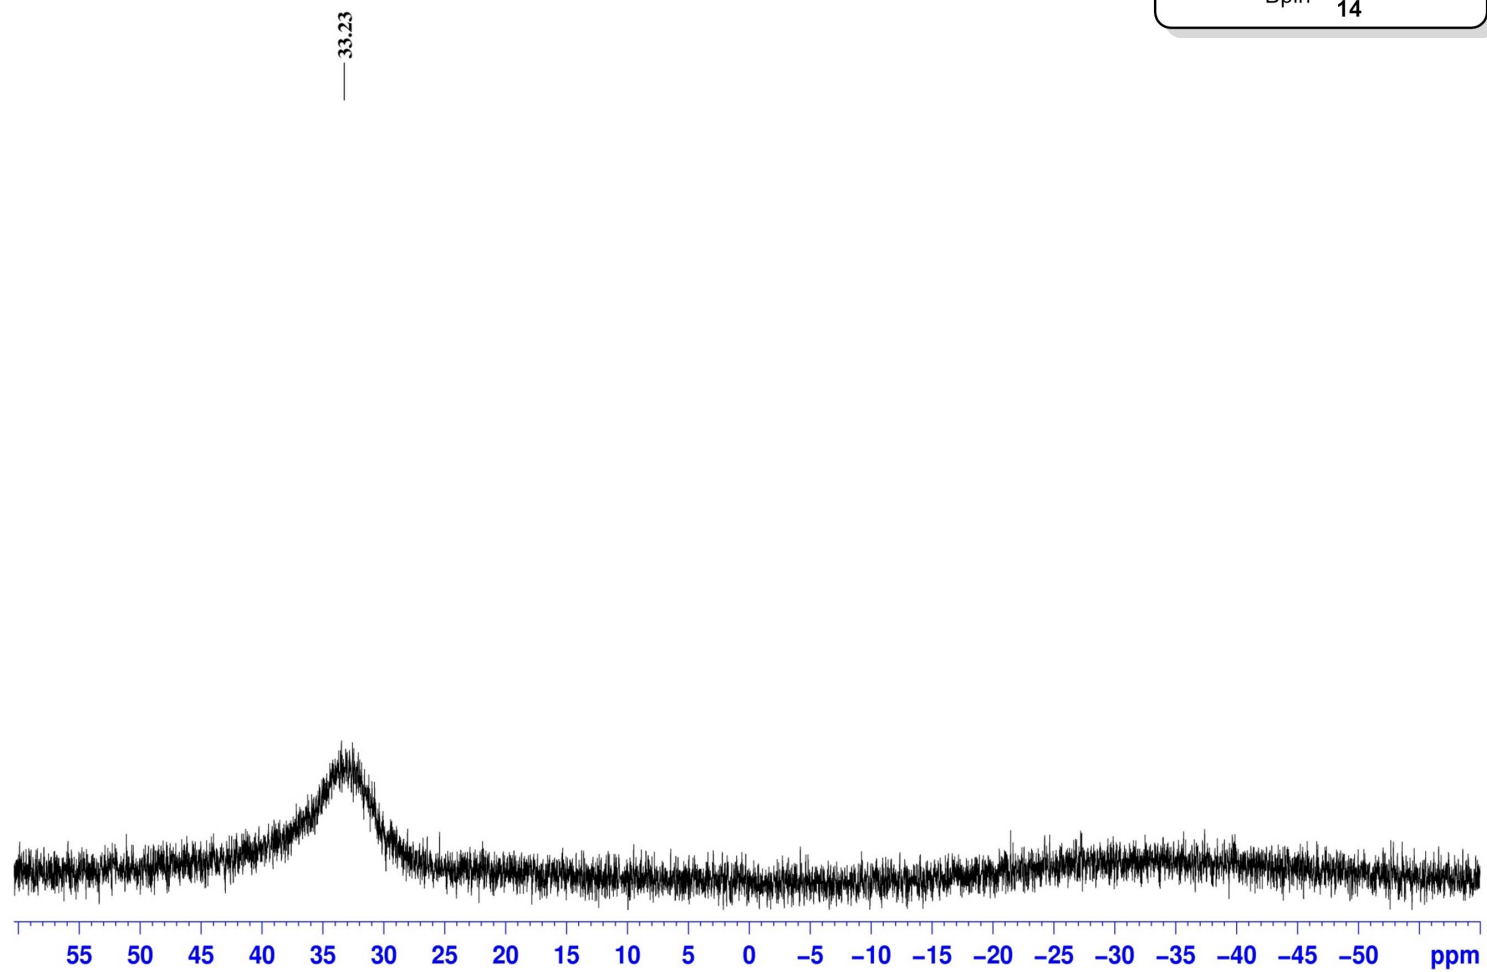

**<sup>1</sup>H NMR**  
4-(3,3-dimethyl-1-(4,4,5,5-tetramethyl-1,3,2-dioxaborolan-2-yl)butyl)-N-phenylbenzenesulfonamide  
500 MHz, CDCl<sub>3</sub>

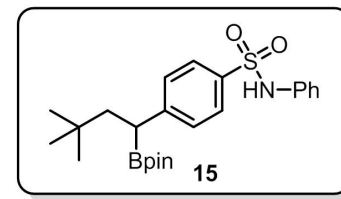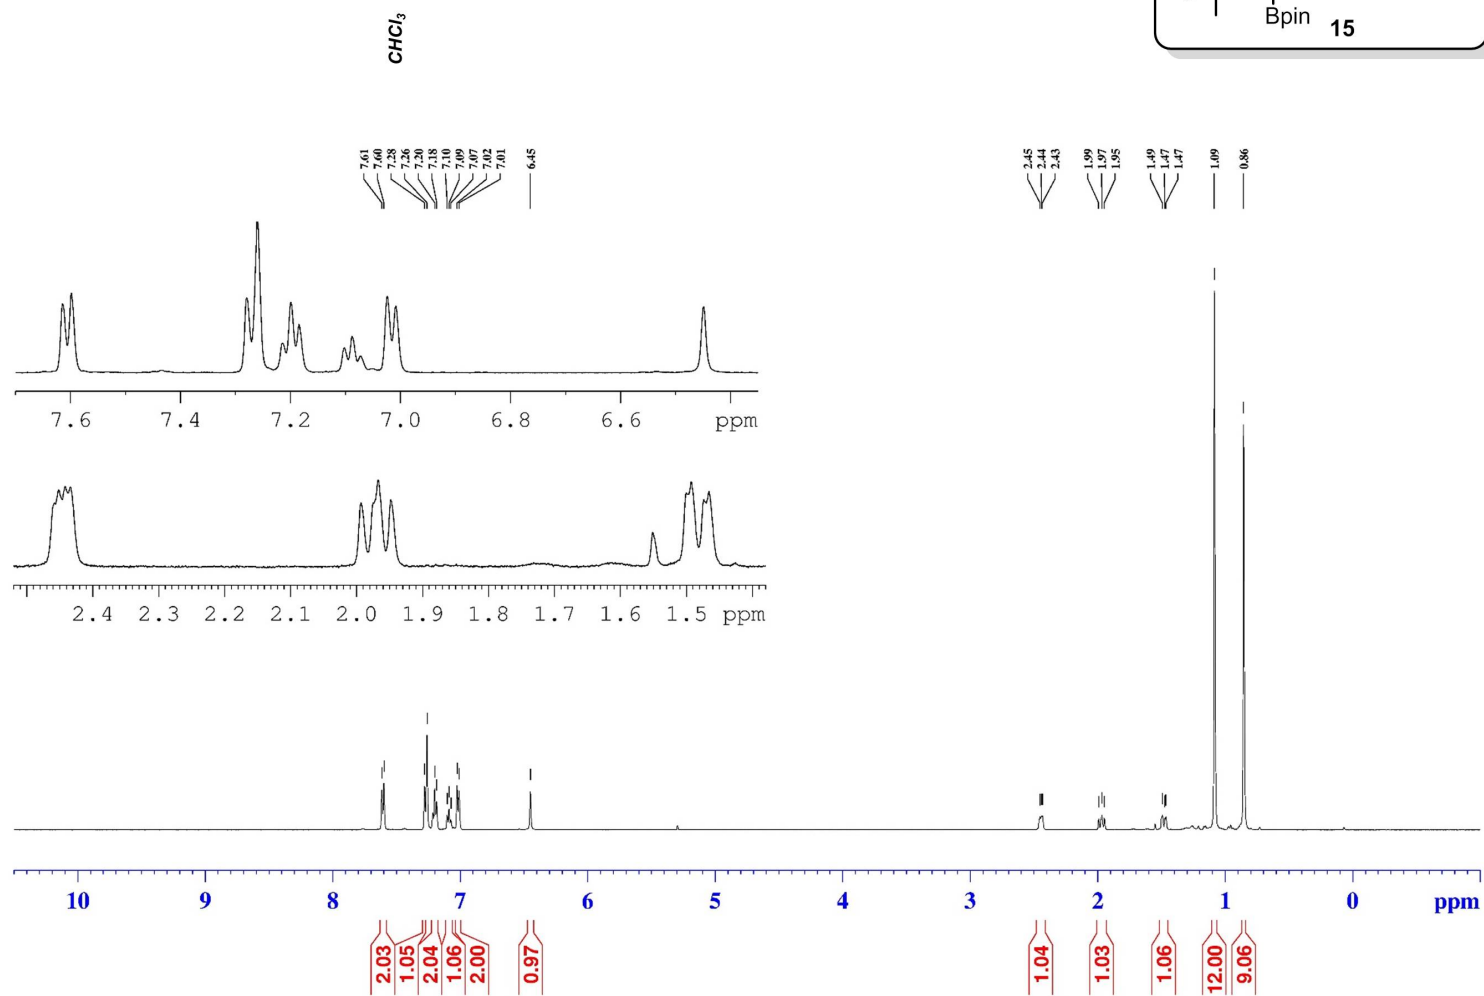

**<sup>13</sup>C NMR**

4-(3,3-Dimethyl-1-(4,4,5,5-tetramethyl-1,3,2-dioxaborolan-2-yl)butyl)-N-phenylbenzenesulfonamide  
125 MHz, CDCl<sub>3</sub>

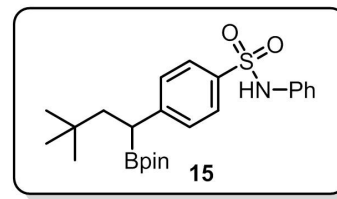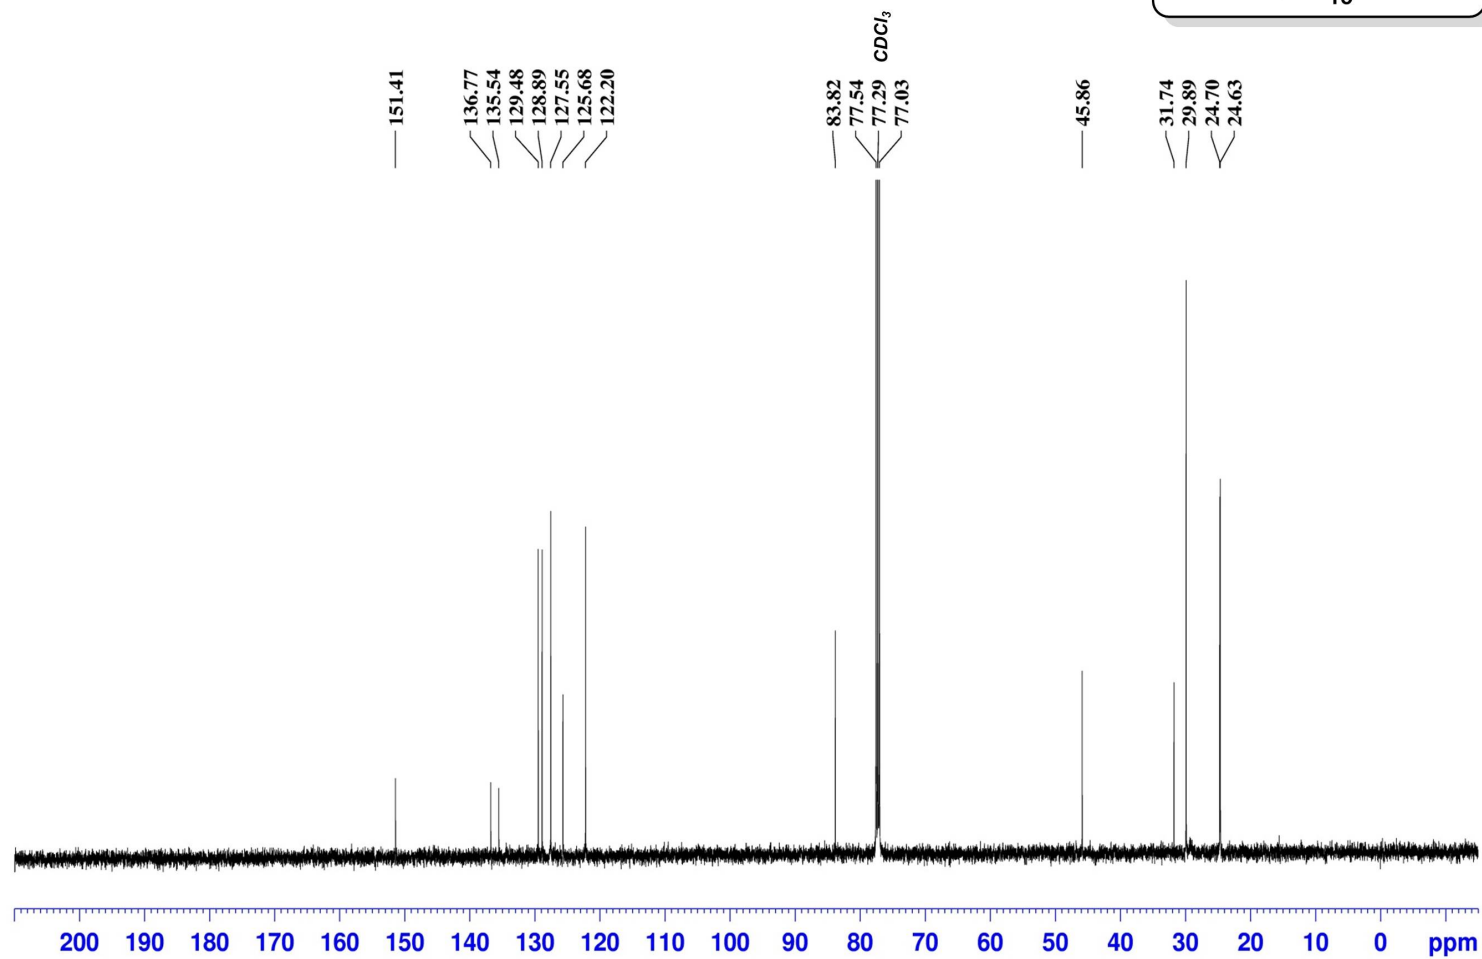

**<sup>11</sup>B NMR**

4-(3,3-dimethyl-1-(4,4,5,5-tetramethyl-1,3,2-dioxaborolan-2-yl)butyl)-N-phenylbenzenesulfonamide  
128 MHz, CDCl<sub>3</sub>

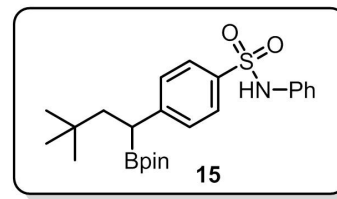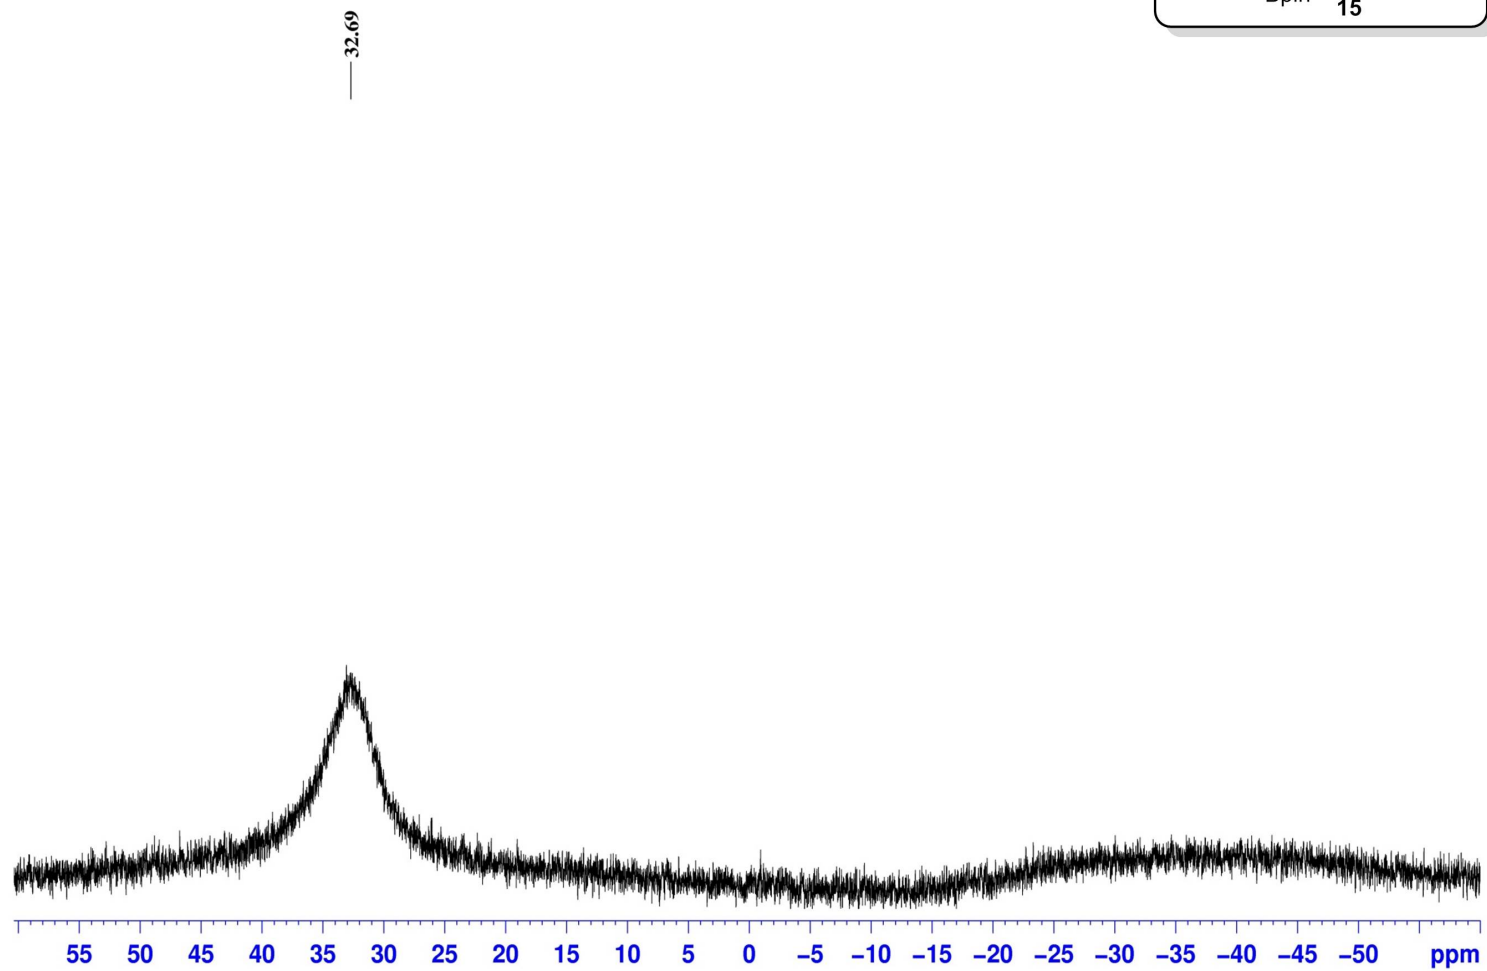

# <sup>1</sup>H NMR

*tert*-butyl acetyl(4-(3,3-dimethyl-1-(4,4,5,5-tetramethyl-1,3,2-dioxaborolan-2-yl)butyl)phenyl)carbamate  
500 MHz, CDCl<sub>3</sub>

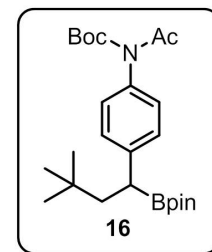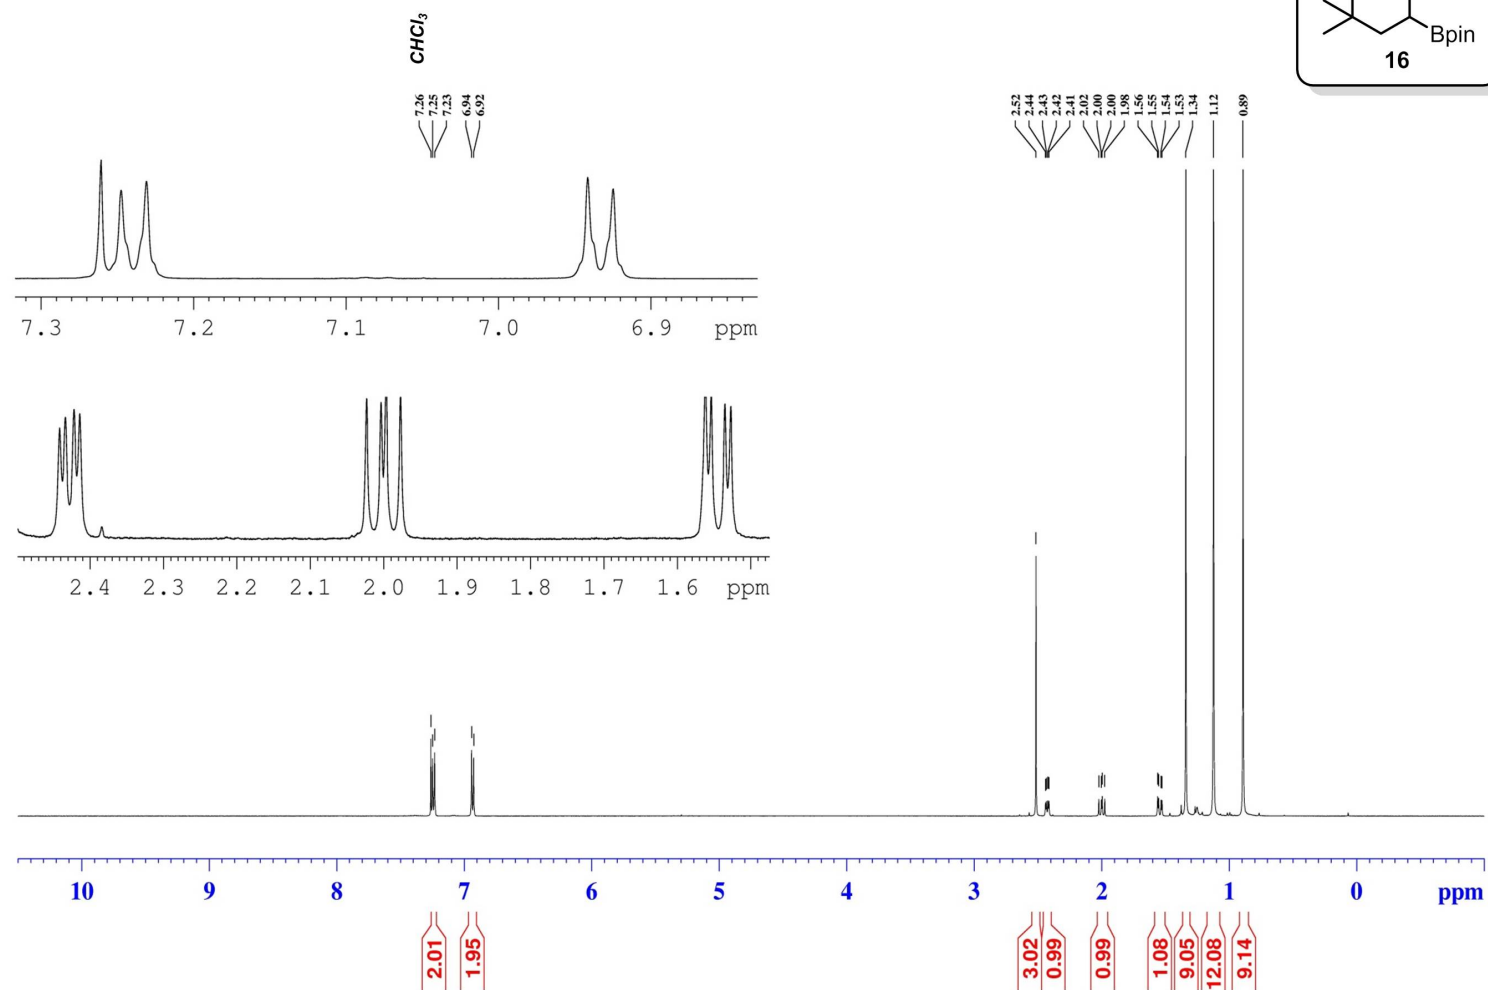



**<sup>13</sup>C NMR**

*Tert*-butyl acetyl(4-(3,3-dimethyl-1-(4,4,5,5-tetramethyl-1,3,2-dioxaborolan-2-yl)butyl)phenyl)carbamate  
125 MHz, CDCl<sub>3</sub>

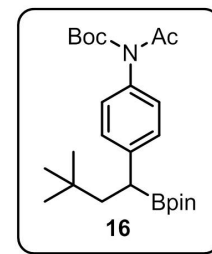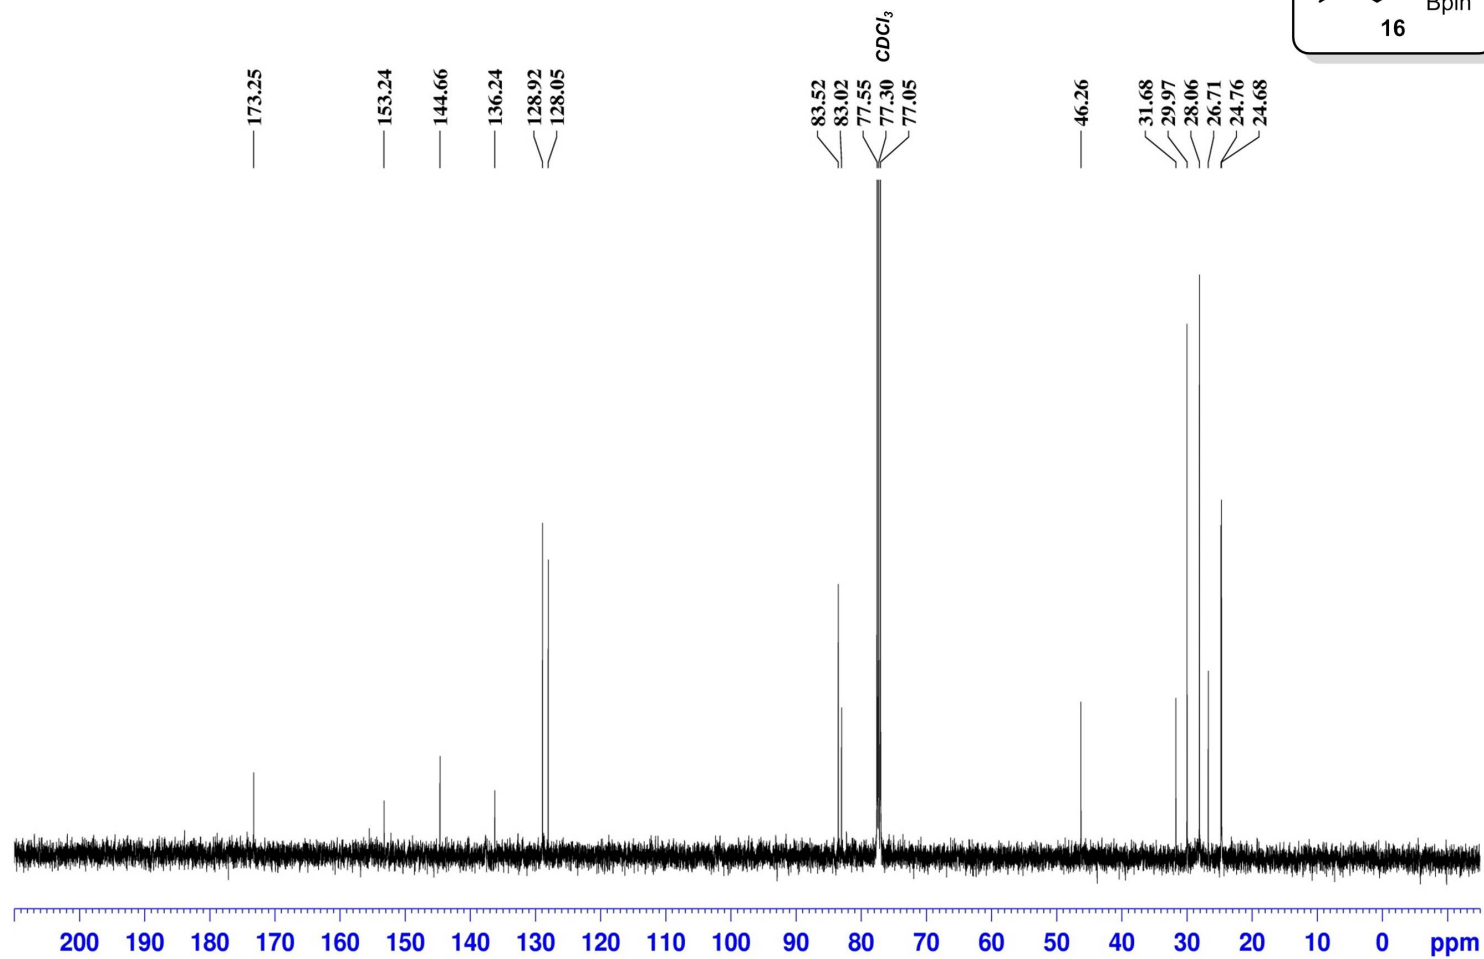

**<sup>11</sup>B NMR**

*tert*-butyl acetyl(4-(3,3-dimethyl-1-(4,4,5,5-tetramethyl-1,3,2-dioxaborolan-2-yl)butyl)phenyl)carbamate  
128 MHz, CDCl<sub>3</sub>

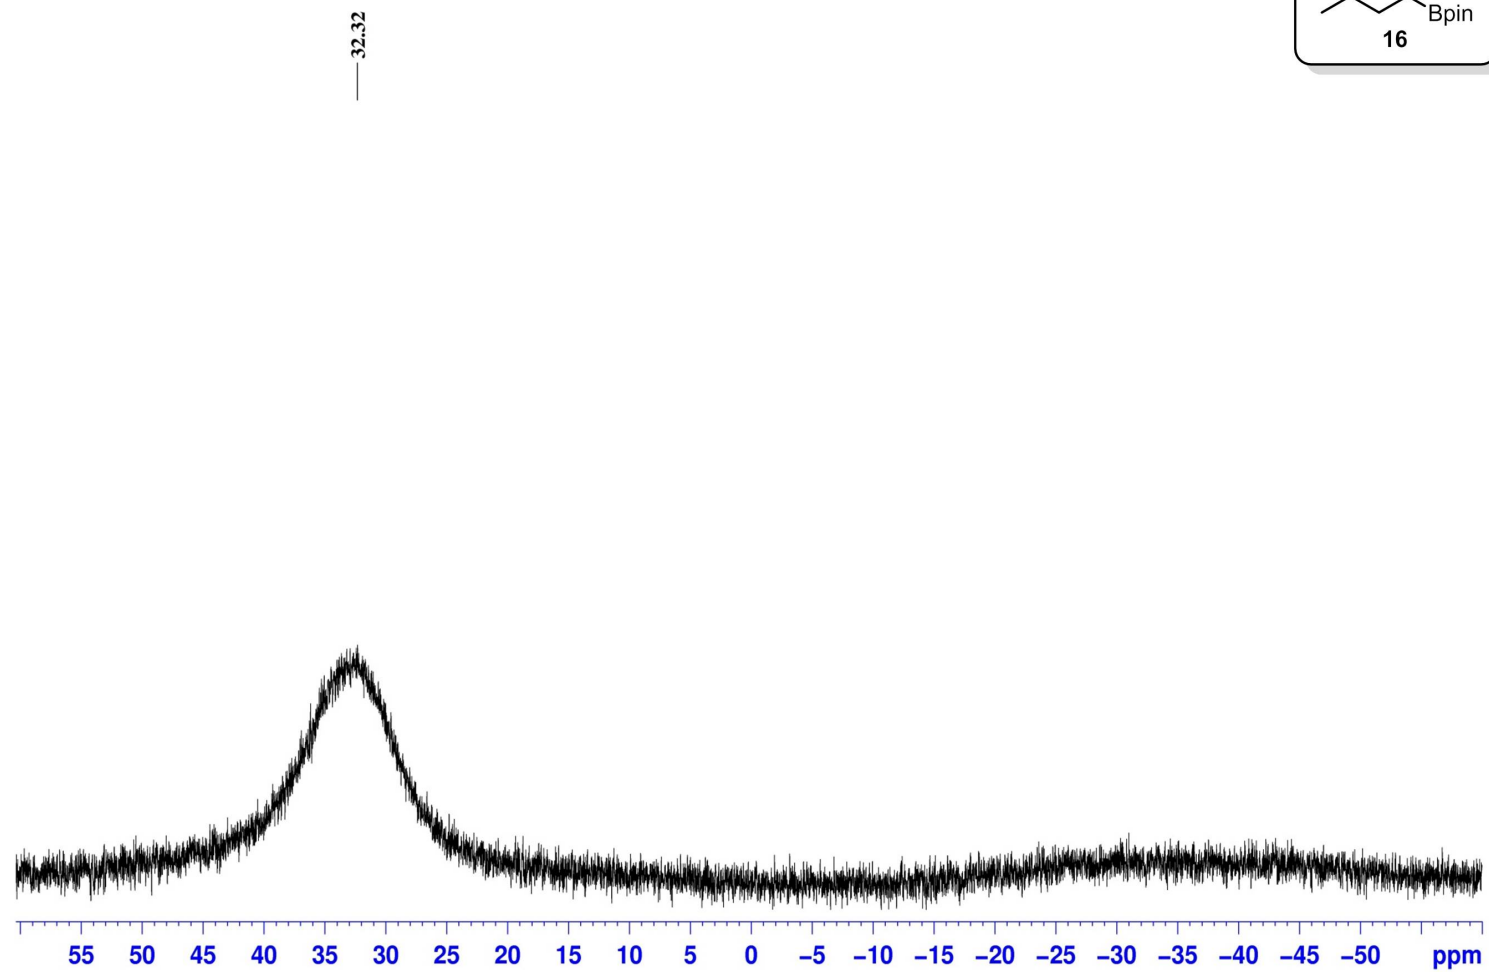

# <sup>1</sup>H NMR

2-(1-(4-(1,3-dioxolan-2-yl)phenyl)-3,3-dimethylbutyl)-4,4,5,5-tetramethyl-1,3,2-dioxaborolane  
500 MHz, CDCl<sub>3</sub>

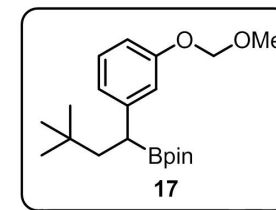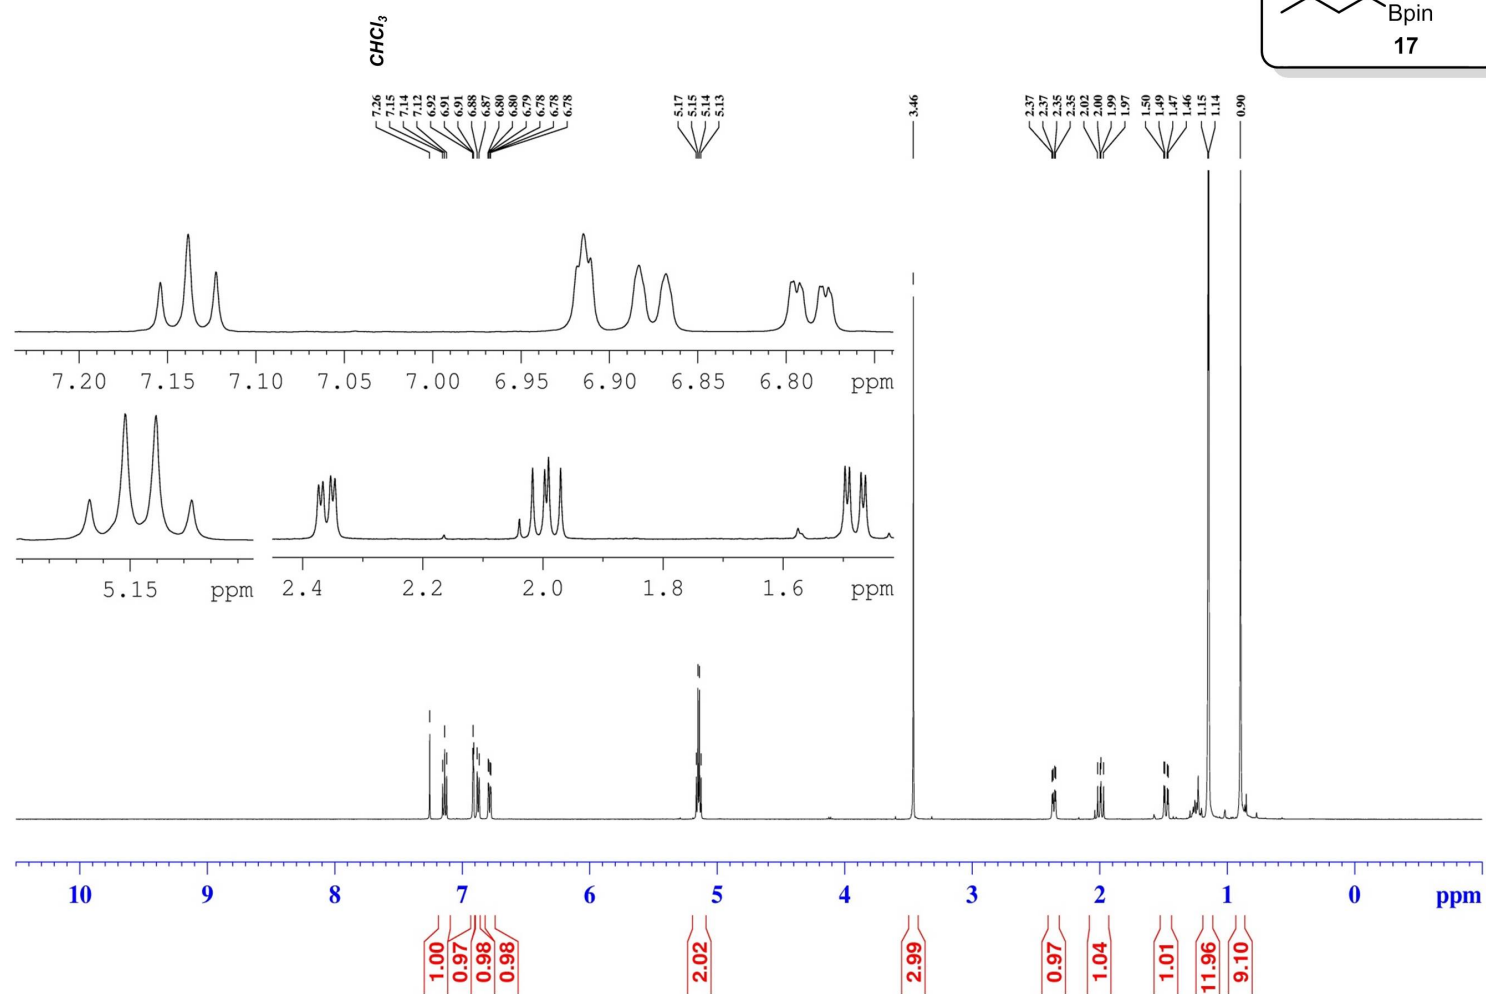

**<sup>13</sup>C NMR**

2-(1-(4-(1,3-Dioxolan-2-yl)phenyl)-3,3-dimethylbutyl)-4,4,5,5-tetramethyl-1,3,2-dioxaborolane  
125 MHz, CDCl<sub>3</sub>

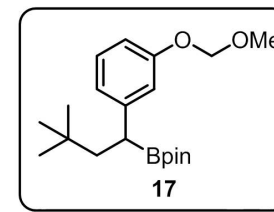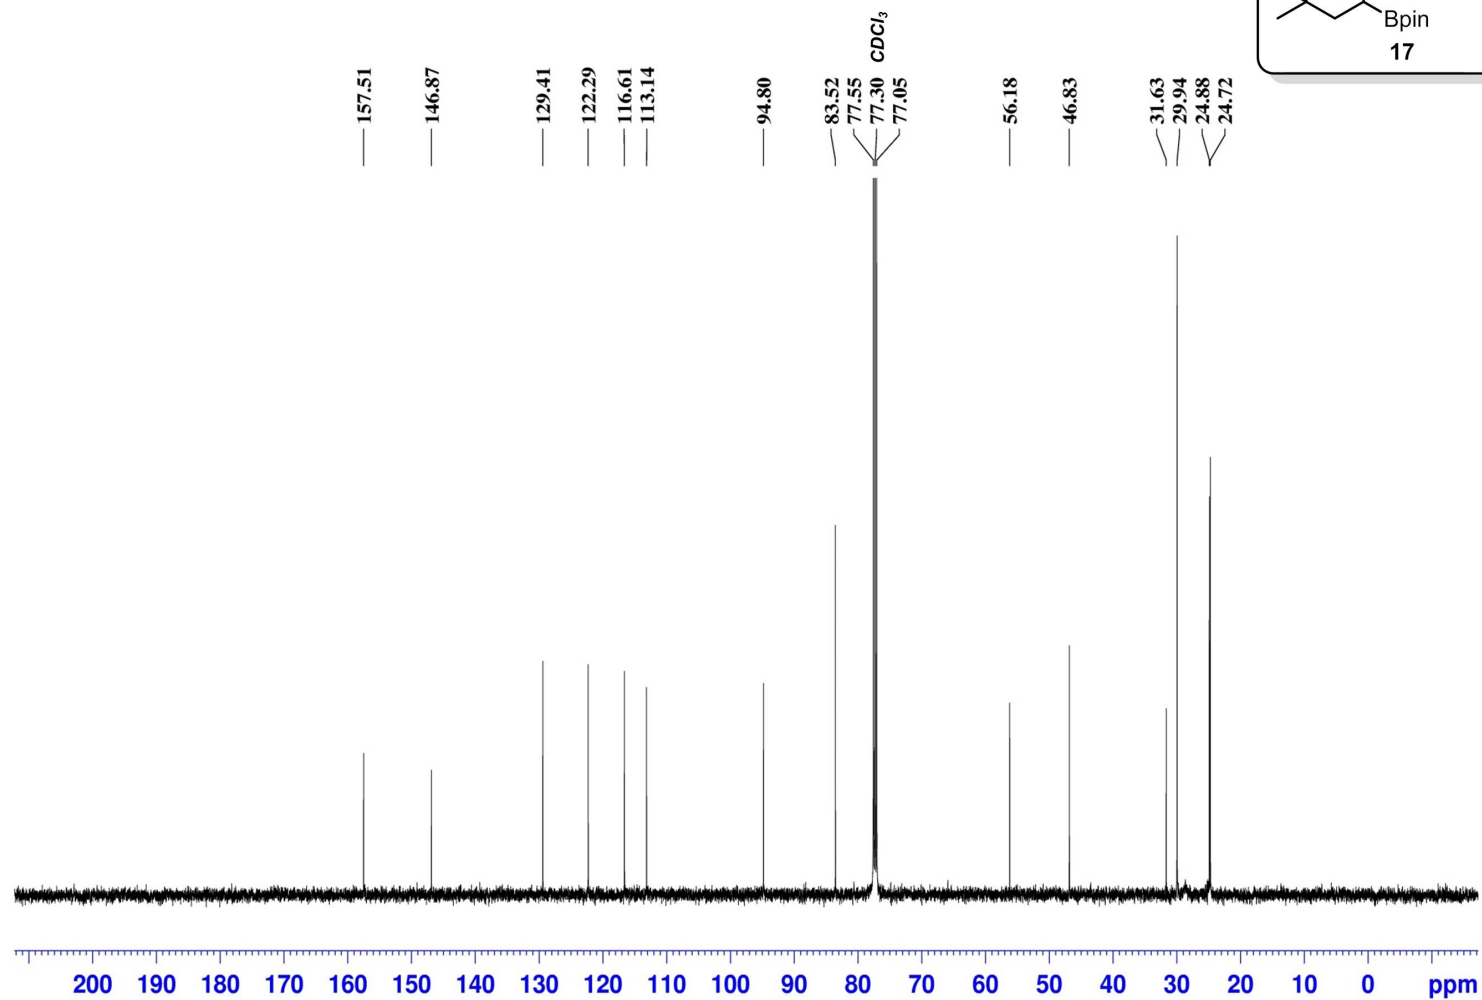

**<sup>11</sup>B NMR**

2-(1-(4-(1,3-dioxolan-2-yl)phenyl)-3,3-dimethylbutyl)-4,4,5,5-tetramethyl-1,3,2-dioxaborolane  
128 MHz, CDCl<sub>3</sub>

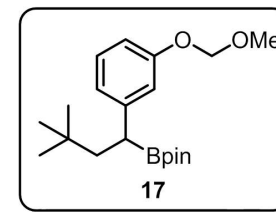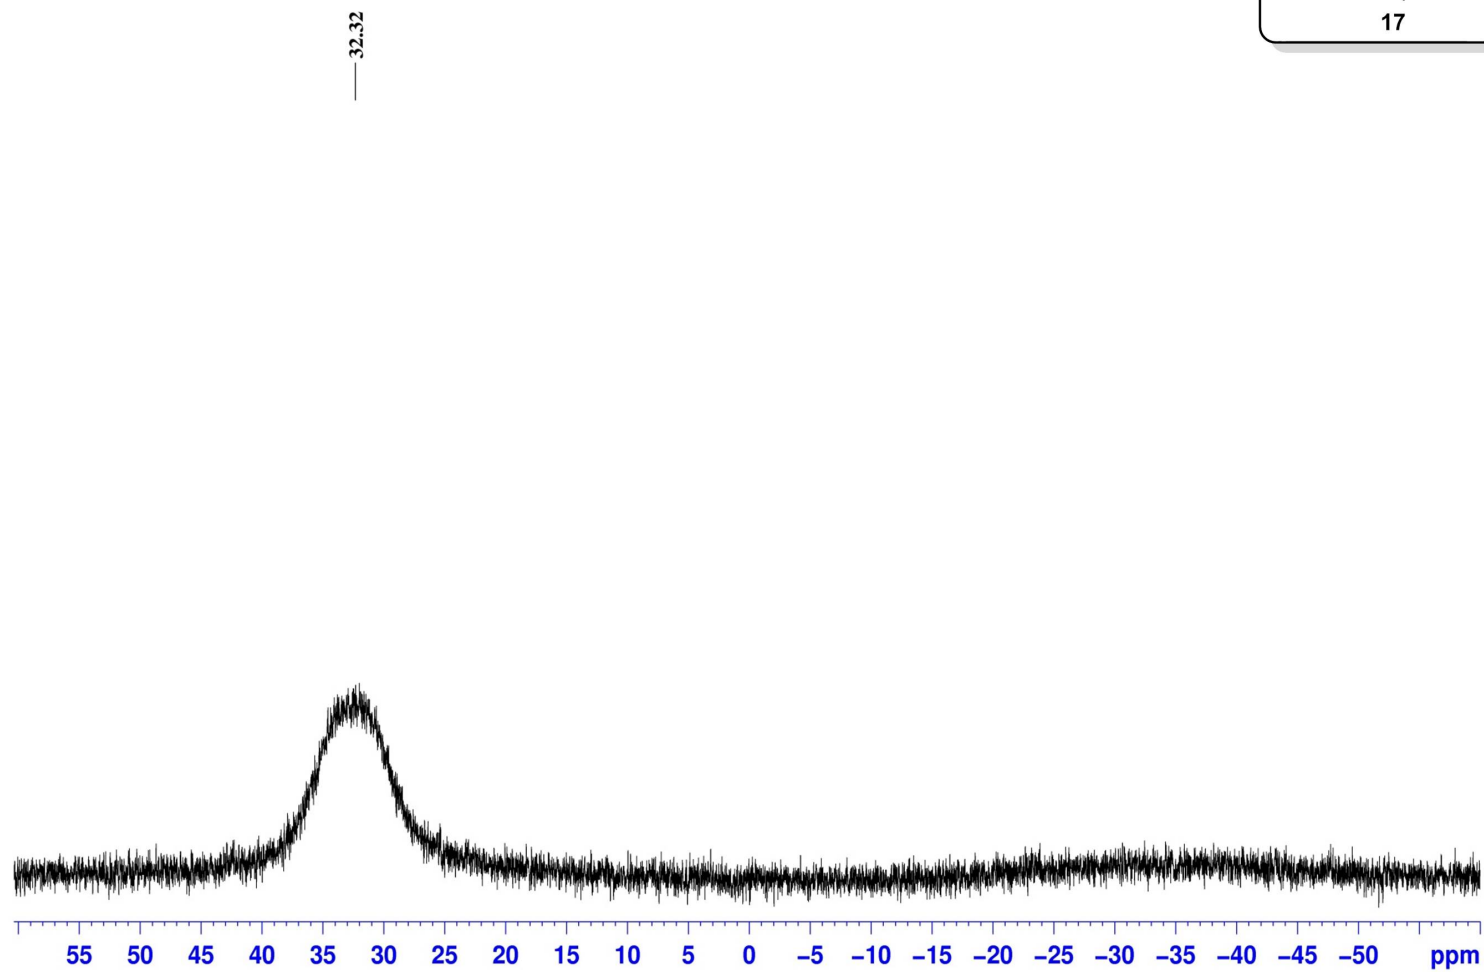

# <sup>1</sup>H NMR

1-(3-(3,3-dimethyl-1-(4,4,5,5-tetramethyl-1,3,2-dioxaborolan-2-yl)butyl)phenyl)-2,2,2-trifluoroethanone  
500 MHz, CDCl<sub>3</sub>

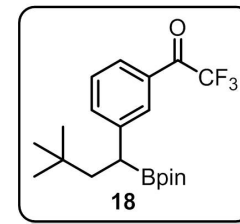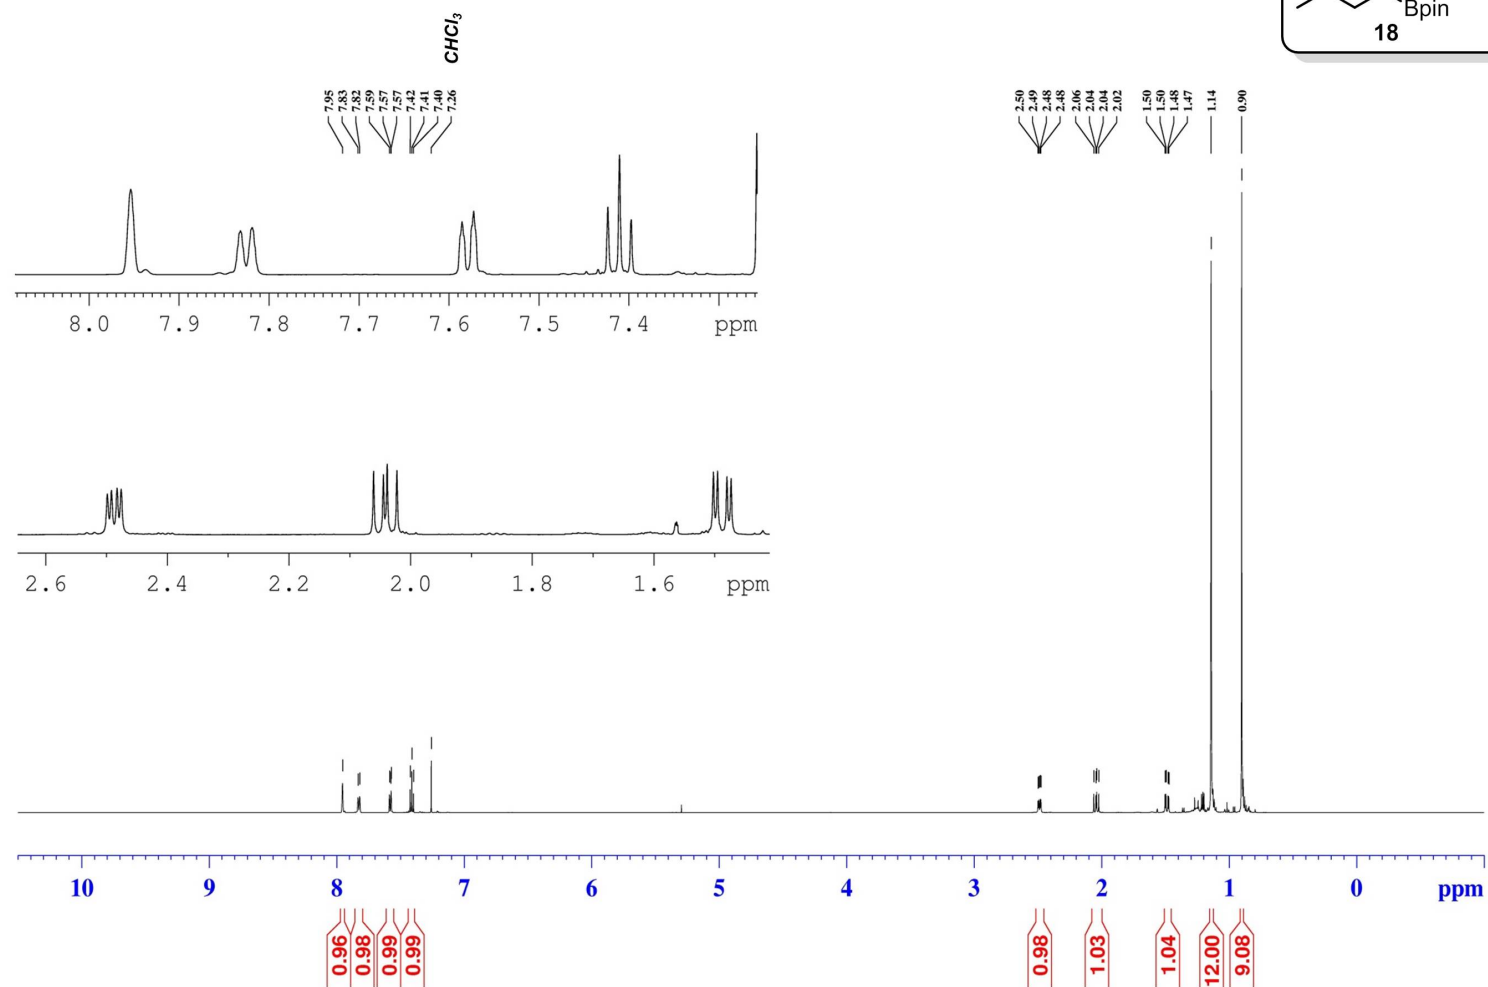

### <sup>13</sup>C NMR

1-(3-(3,3-Dimethyl-1-(4,4,5,5-tetramethyl-1,3,2-dioxaborolan-2-yl)butyl)phenyl)-2,2,2-trifluoroethanone  
125 MHz, CDCl<sub>3</sub>

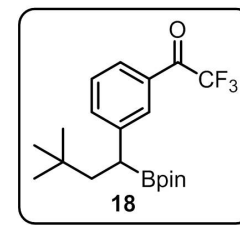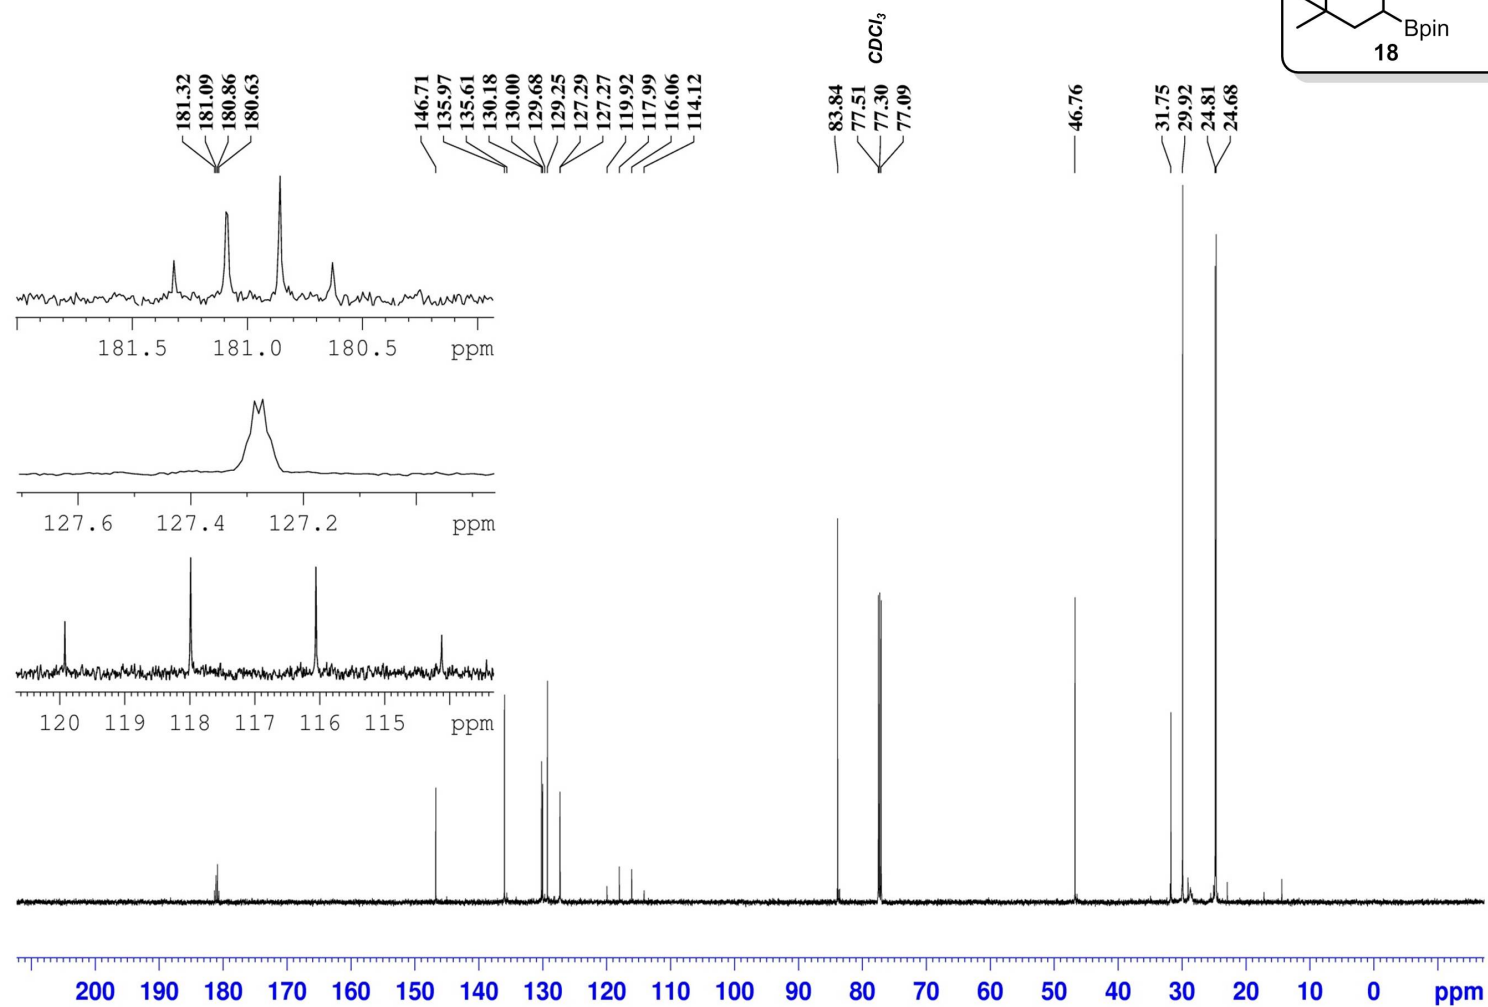

**<sup>19</sup>F NMR**

1-(3-(3,3-dimethyl-1-(4,4,5,5-tetramethyl-1,3,2-dioxaborolan-2-yl)butyl)phenyl)-2,2,2-trifluoroethanone  
471 MHz, CDCl<sub>3</sub>

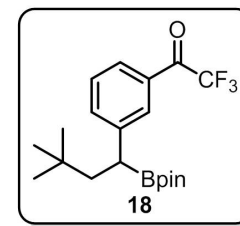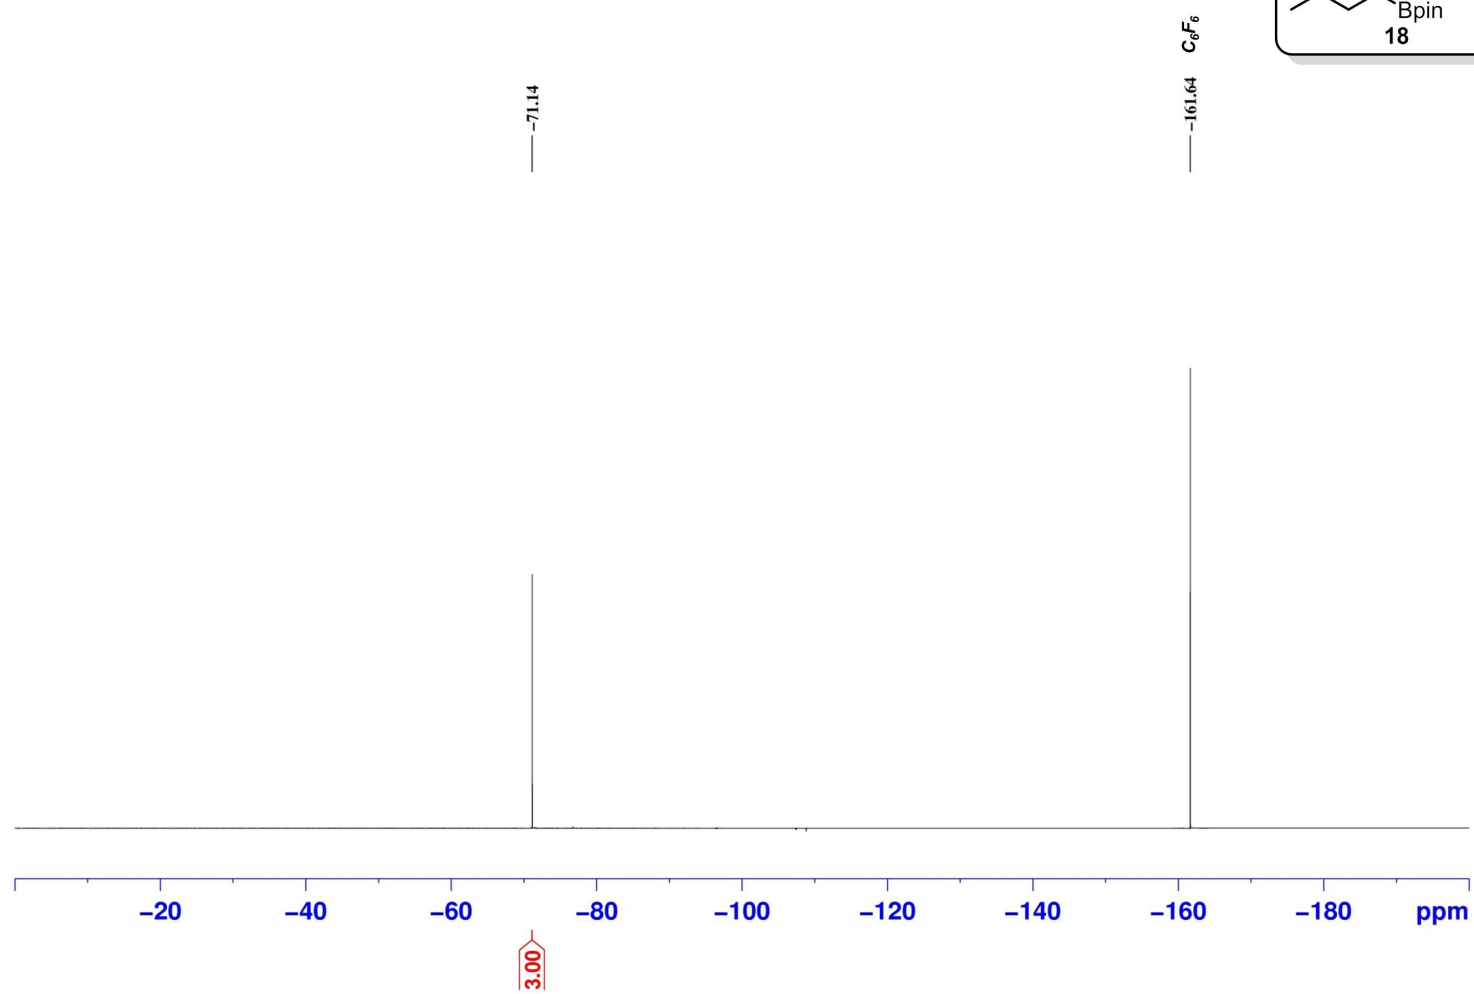

S200



**<sup>11</sup>B NMR**

1-(3-(3,3-dimethyl-1-(4,4,5,5-tetramethyl-1,3,2-dioxaborolan-2-yl)butyl)phenyl)-2,2,2-trifluoroethanone  
128 MHz, CDCl<sub>3</sub>

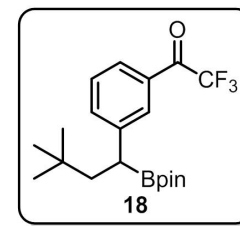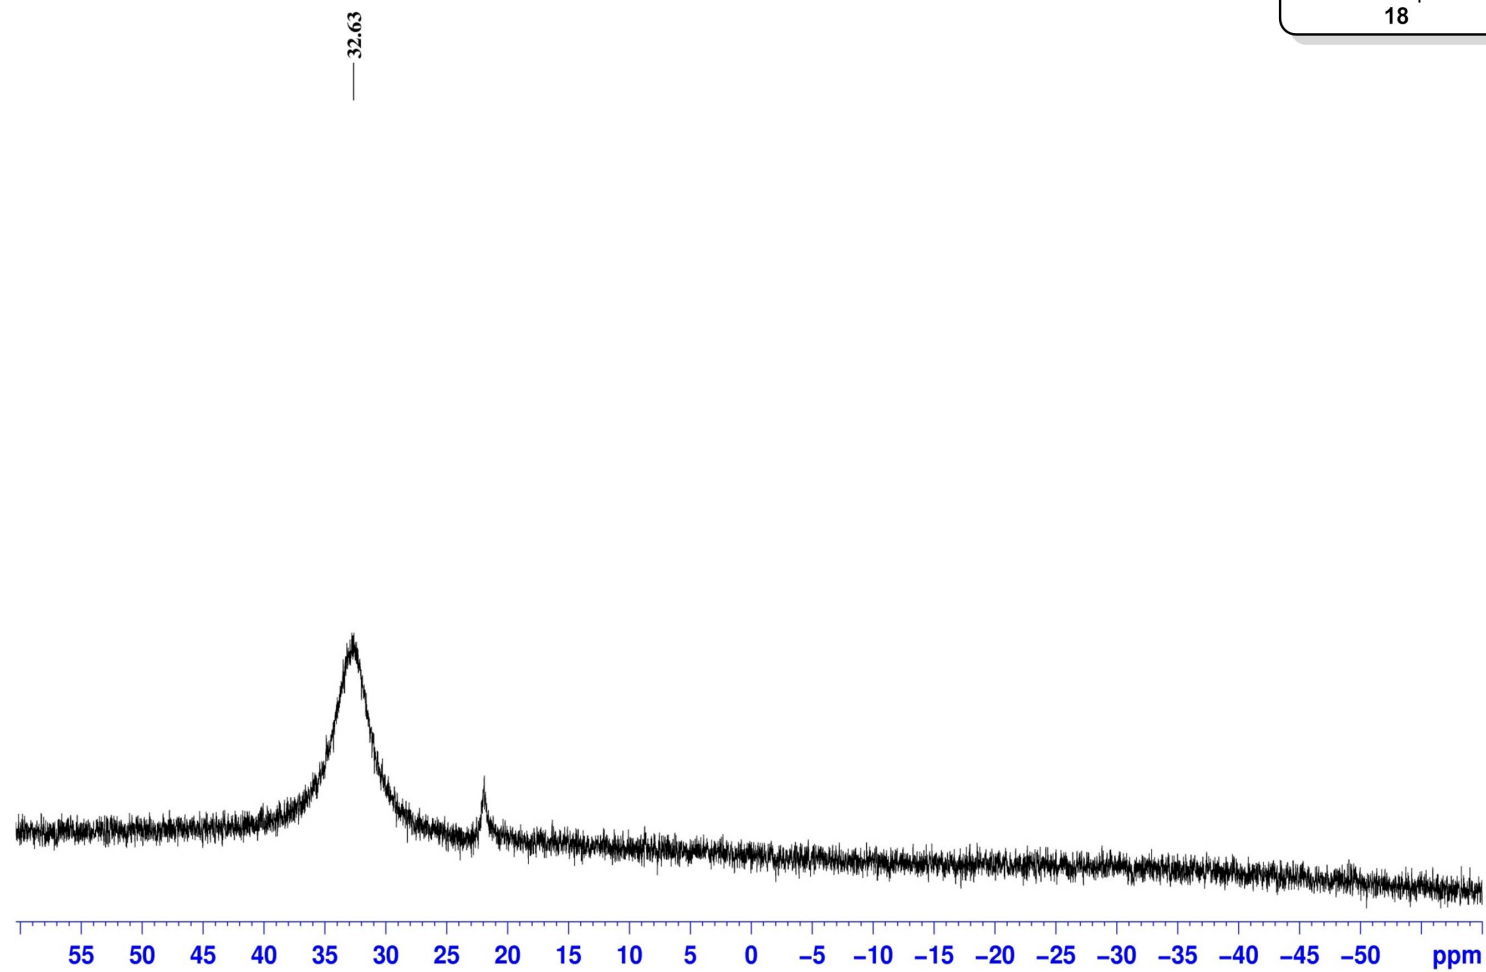

S201

# <sup>1</sup>H NMR

*N,N*-dibenzyl-4-(3,3-dimethyl-1-(4,4,5,5-tetramethyl-1,3,2-dioxaborolan-2-yl)butyl)benzamide  
500 MHz, CDCl<sub>3</sub>

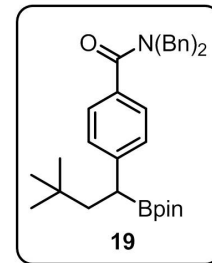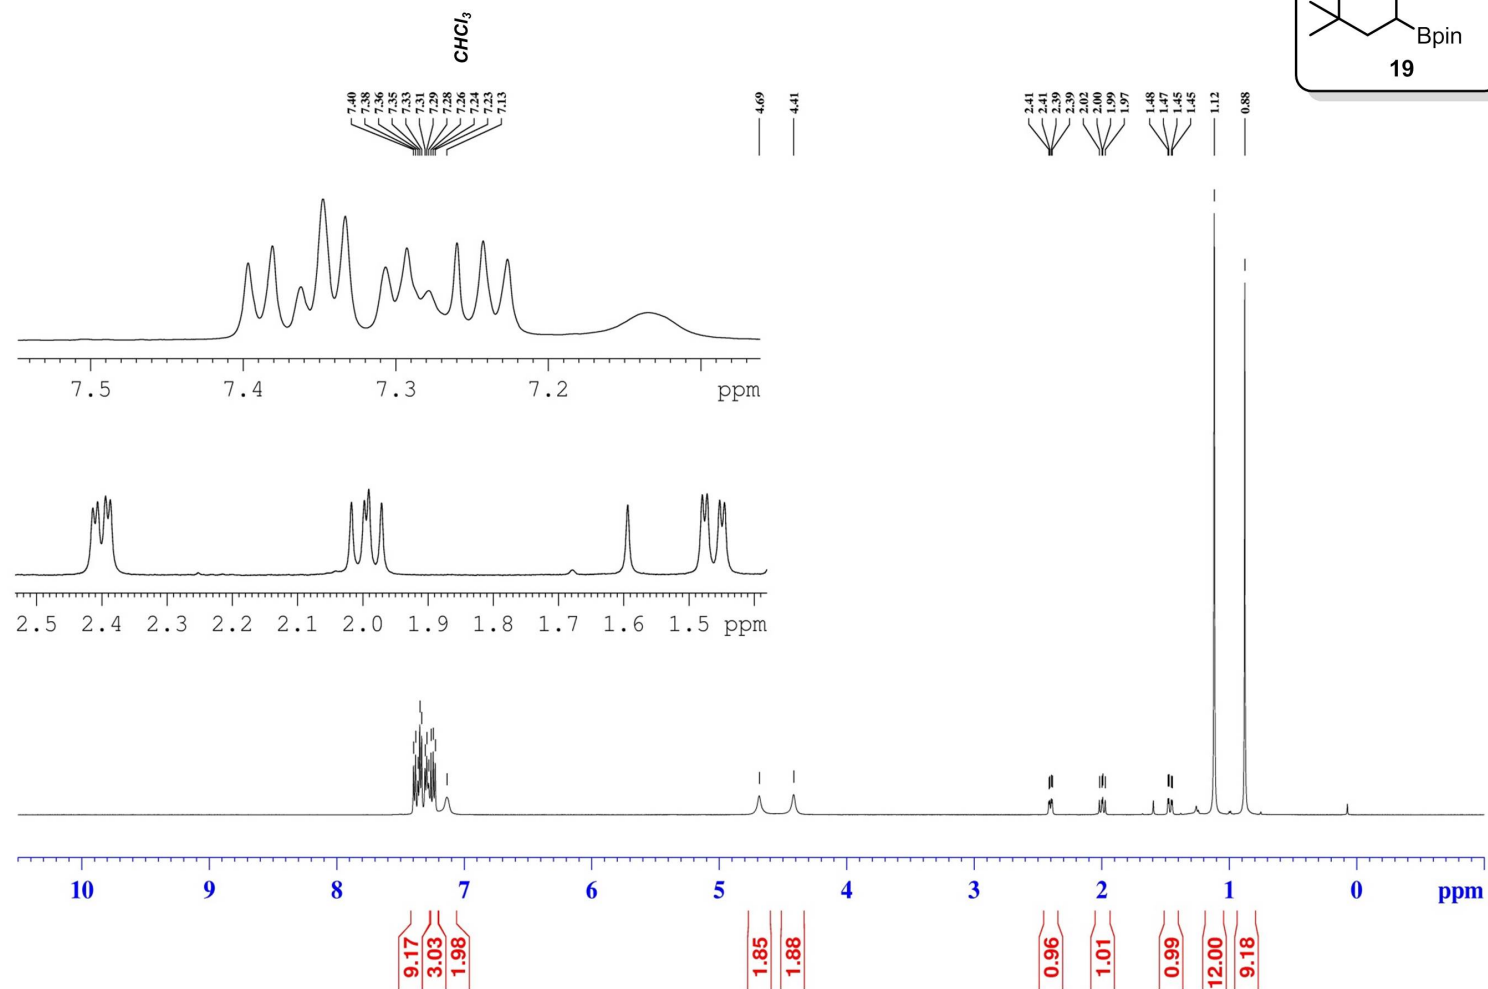

**<sup>13</sup>C NMR**

*N,N*-Dibenzyl-4-(3,3-dimethyl-1-(4,4,5,5-tetramethyl-1,3,2-dioxaborolan-2-yl)butyl)benzamide  
125 MHz, CDCl<sub>3</sub>

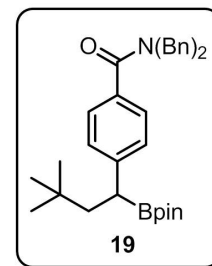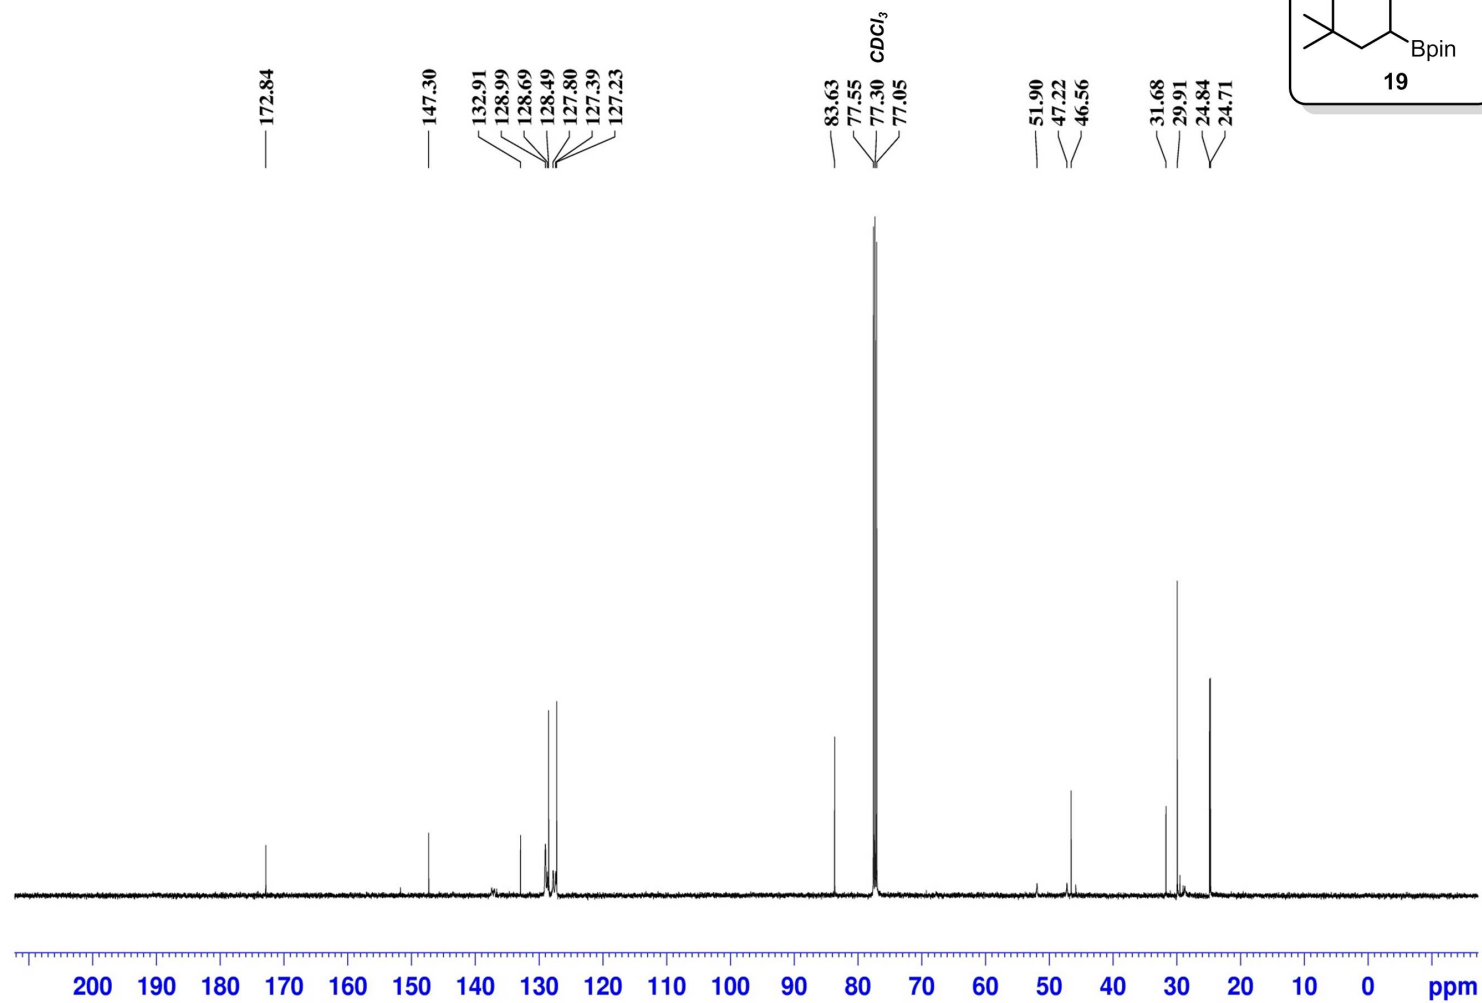

**<sup>11</sup>B NMR**

*N,N*-dibenzyl-4-(3,3-dimethyl-1-(4,4,5,5-tetramethyl-1,3,2-dioxaborolan-2-yl)butyl)benzamide  
128 MHz, CDCl<sub>3</sub>

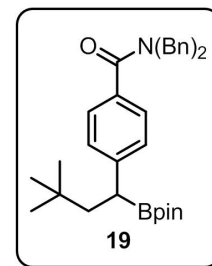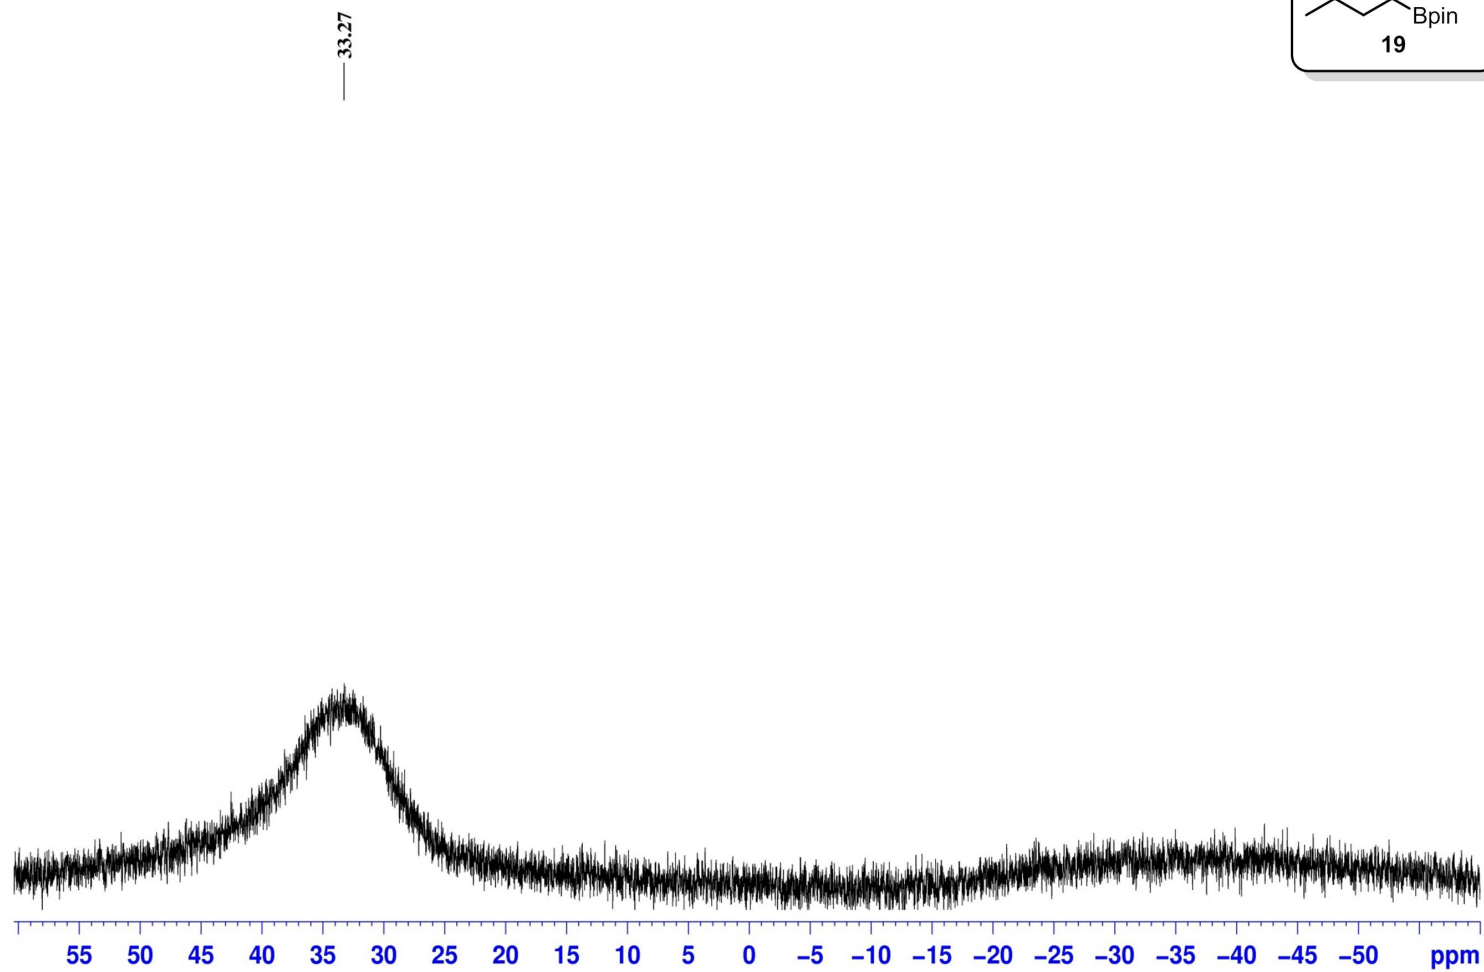

Potassium (1-(4-(dibenzylcarbamoyl)phenyl)-3,3-dimethylbutyl)trifluoroborate  
500 MHz, Acetone- $d_6$

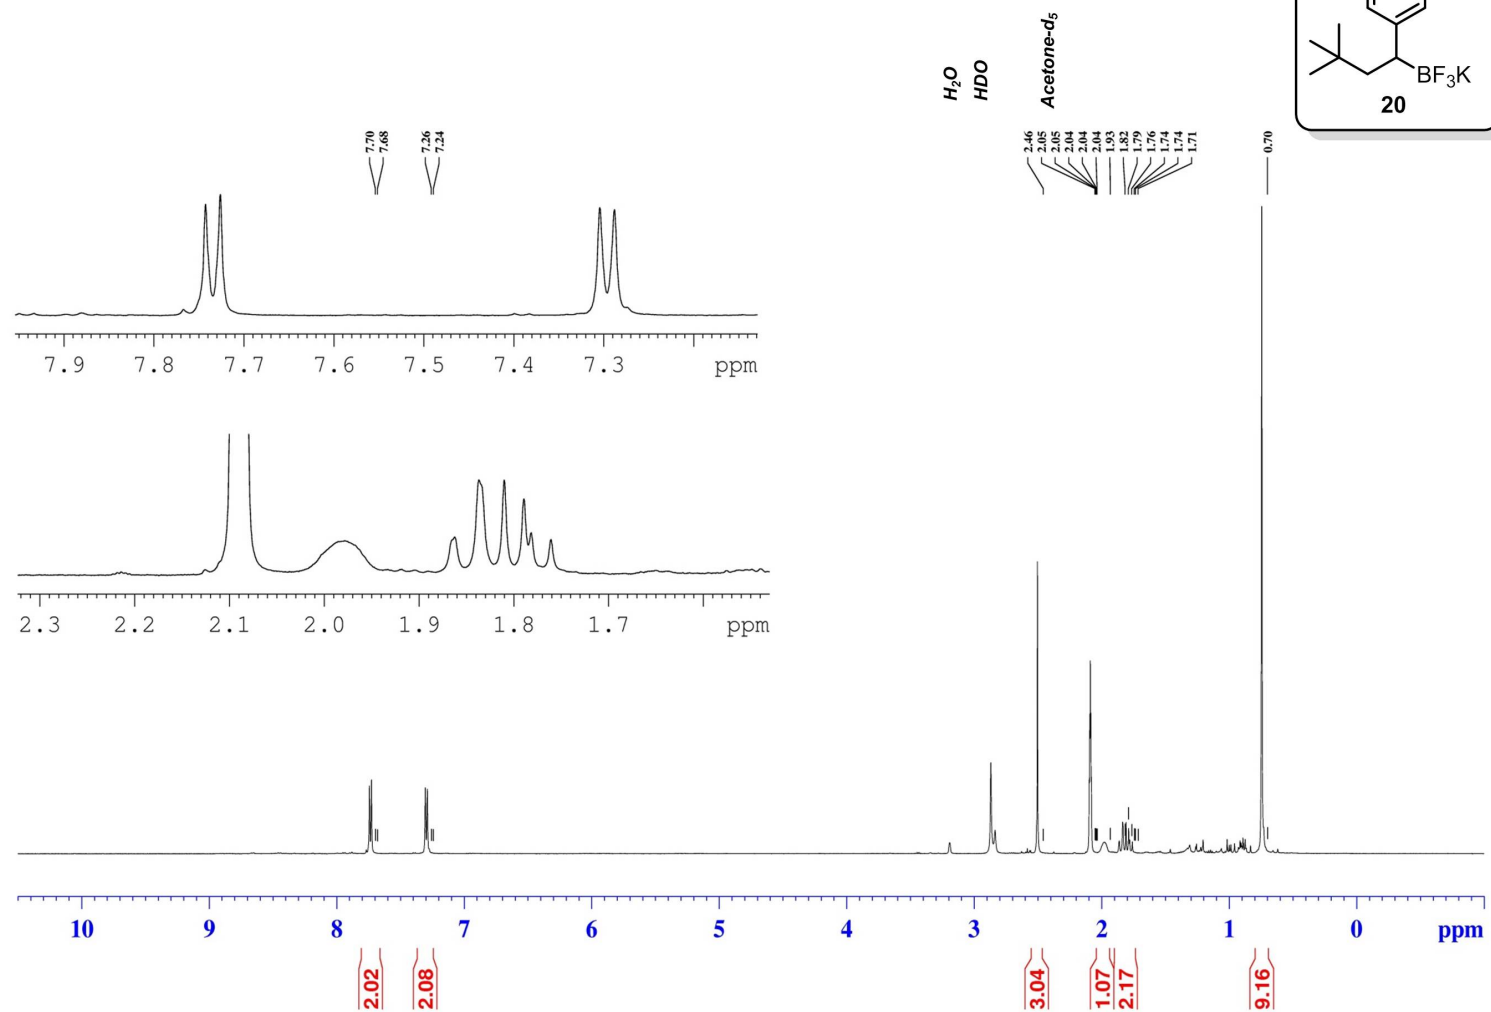

S205

<sup>13</sup>C NMR

Potassium (1-(4-(dibenzylcarbamoyl)phenyl)-3,3-dimethylbutyl)trifluoroborate  
125 MHz, Acetone-d<sub>6</sub>

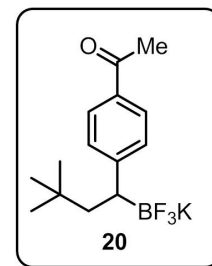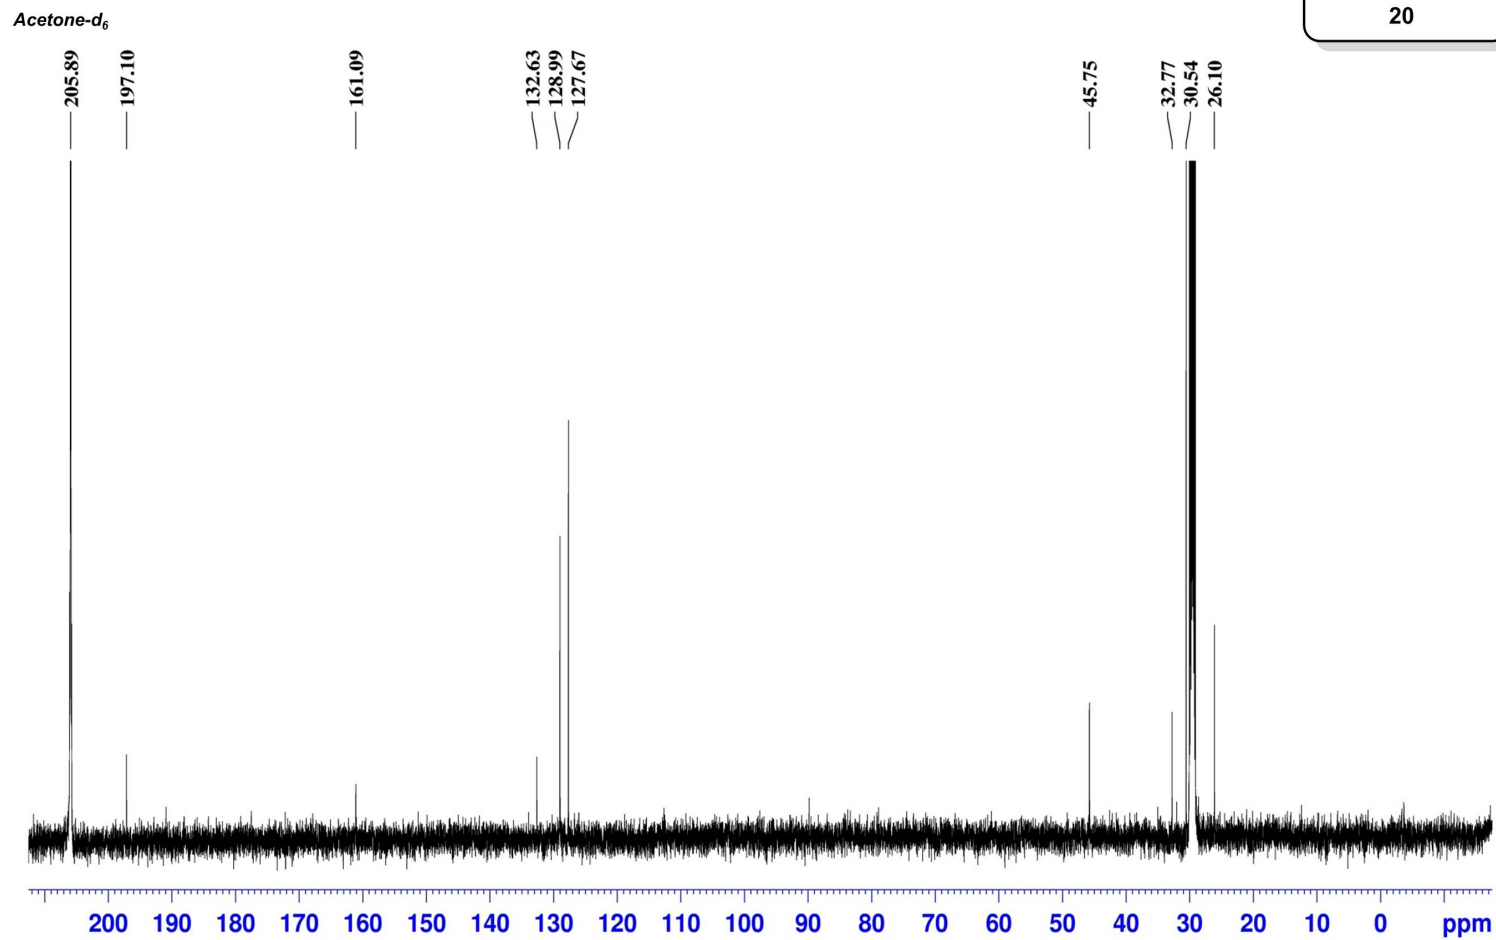

**<sup>19</sup>F NMR**

Potassium (1-(4-(dibenzylcarbamoyl)phenyl)-3,3-dimethylbutyl)trifluoroborate  
471 MHz, Acetone-*d*<sub>6</sub>

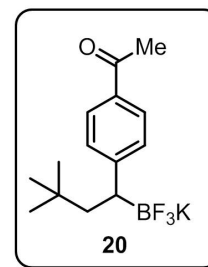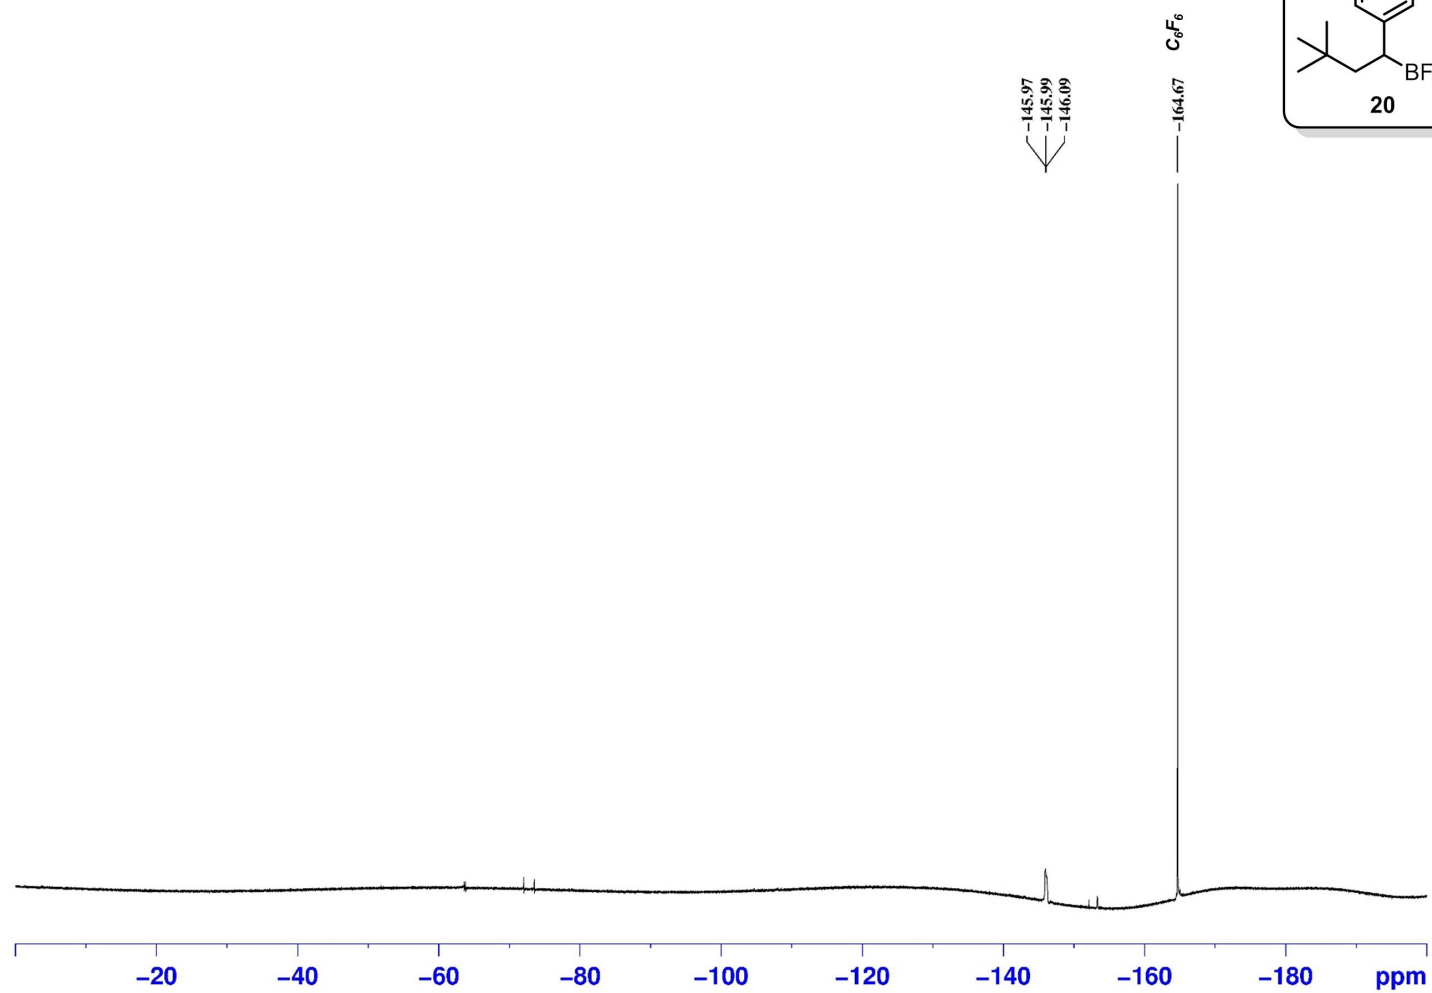

S207

**$^{11}\text{B}$  NMR**

Potassium (1-(4-(dibenzylcarbamoyl)phenyl)-3,3-dimethylbutyl)trifluoroborate  
128 MHz, Acetone- $d_6$

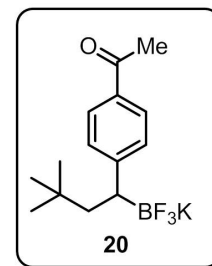

— 4.59

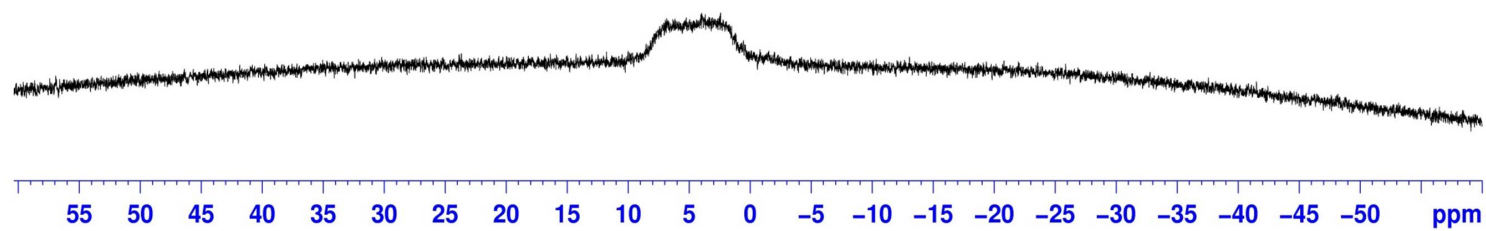

S208



# <sup>1</sup>H NMR

2-(3,3-dimethyl-1-(4,4,5,5-tetramethyl-1,3,2-dioxaborolan-2-yl)butyl)benzonitrile  
500 MHz, CDCl<sub>3</sub>

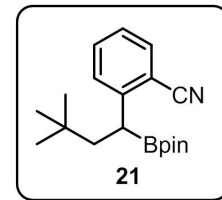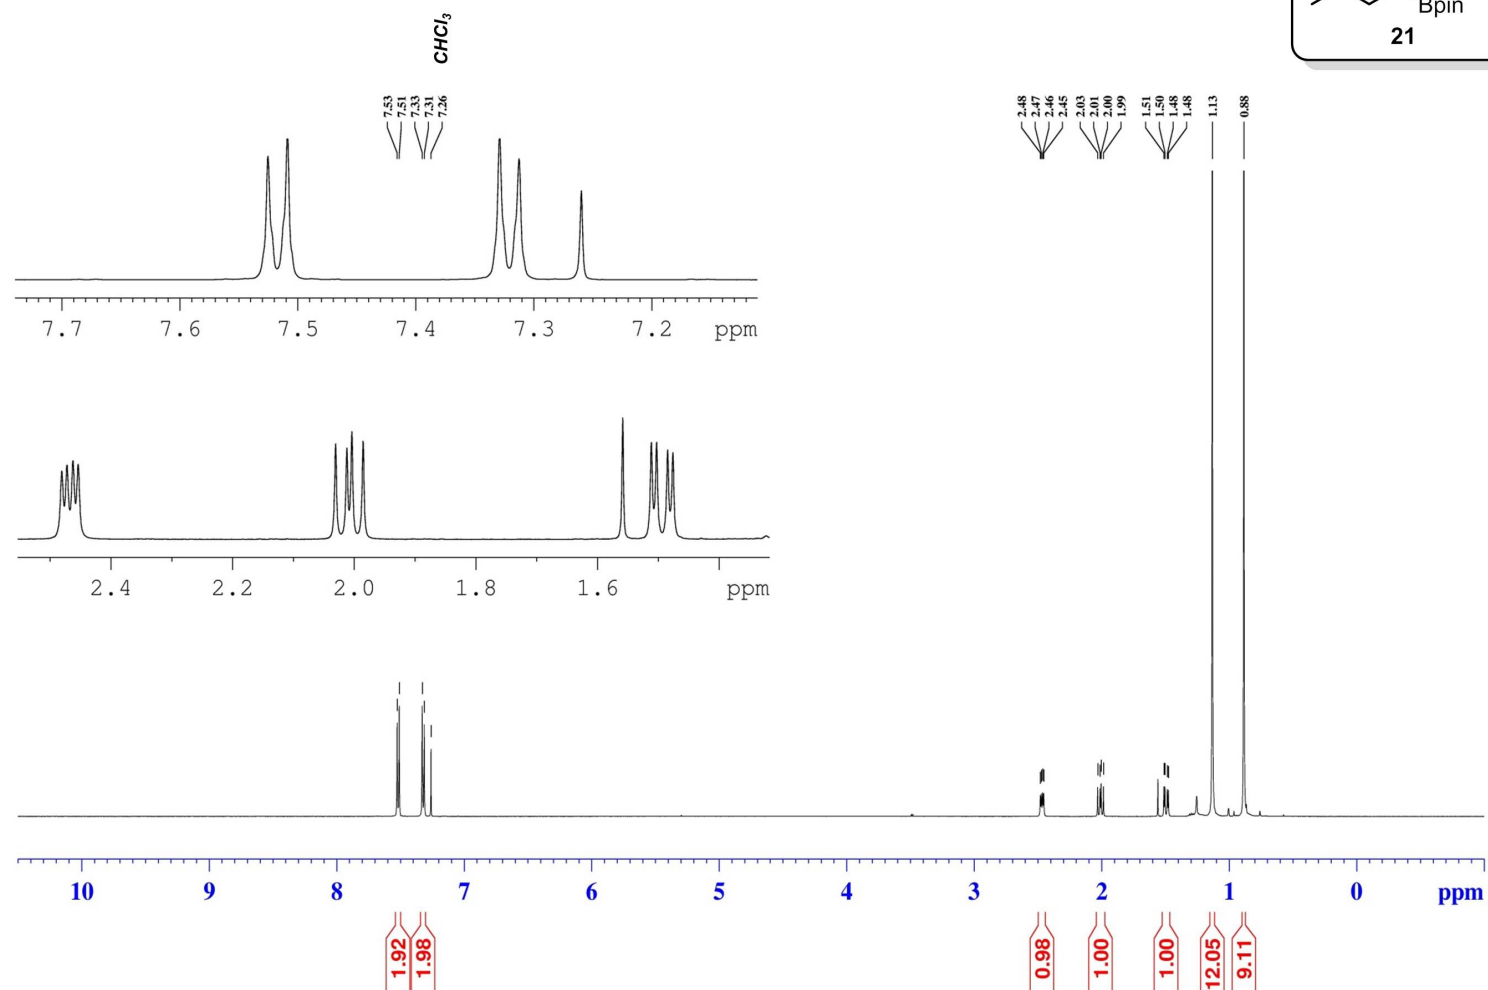

**<sup>13</sup>C NMR**

2-(3,3-Dimethyl-1-(4,4,5,5-tetramethyl-1,3,2-dioxaborolan-2-yl)butyl)benzonitrile  
125 MHz, CDCl<sub>3</sub>

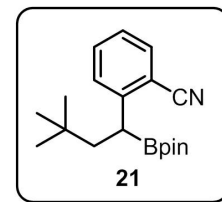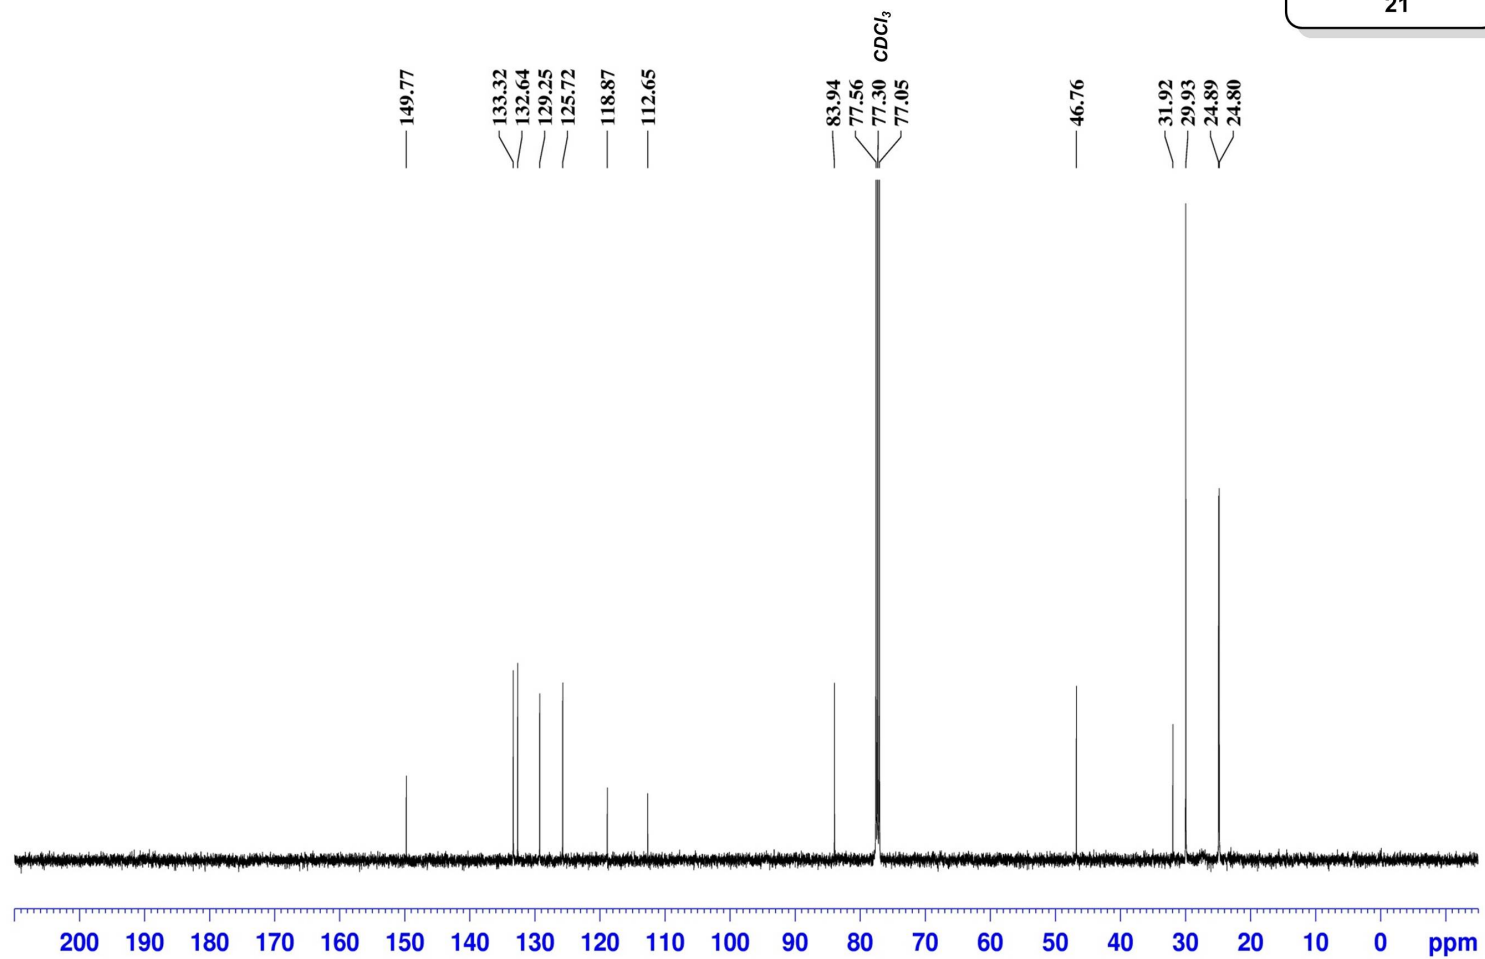

**<sup>11</sup>B NMR**

2-(3,3-dimethyl-1-(4,4,5,5-tetramethyl-1,3,2-dioxaborolan-2-yl)butyl)benzonitrile  
128 MHz, CDCl<sub>3</sub>

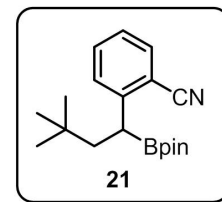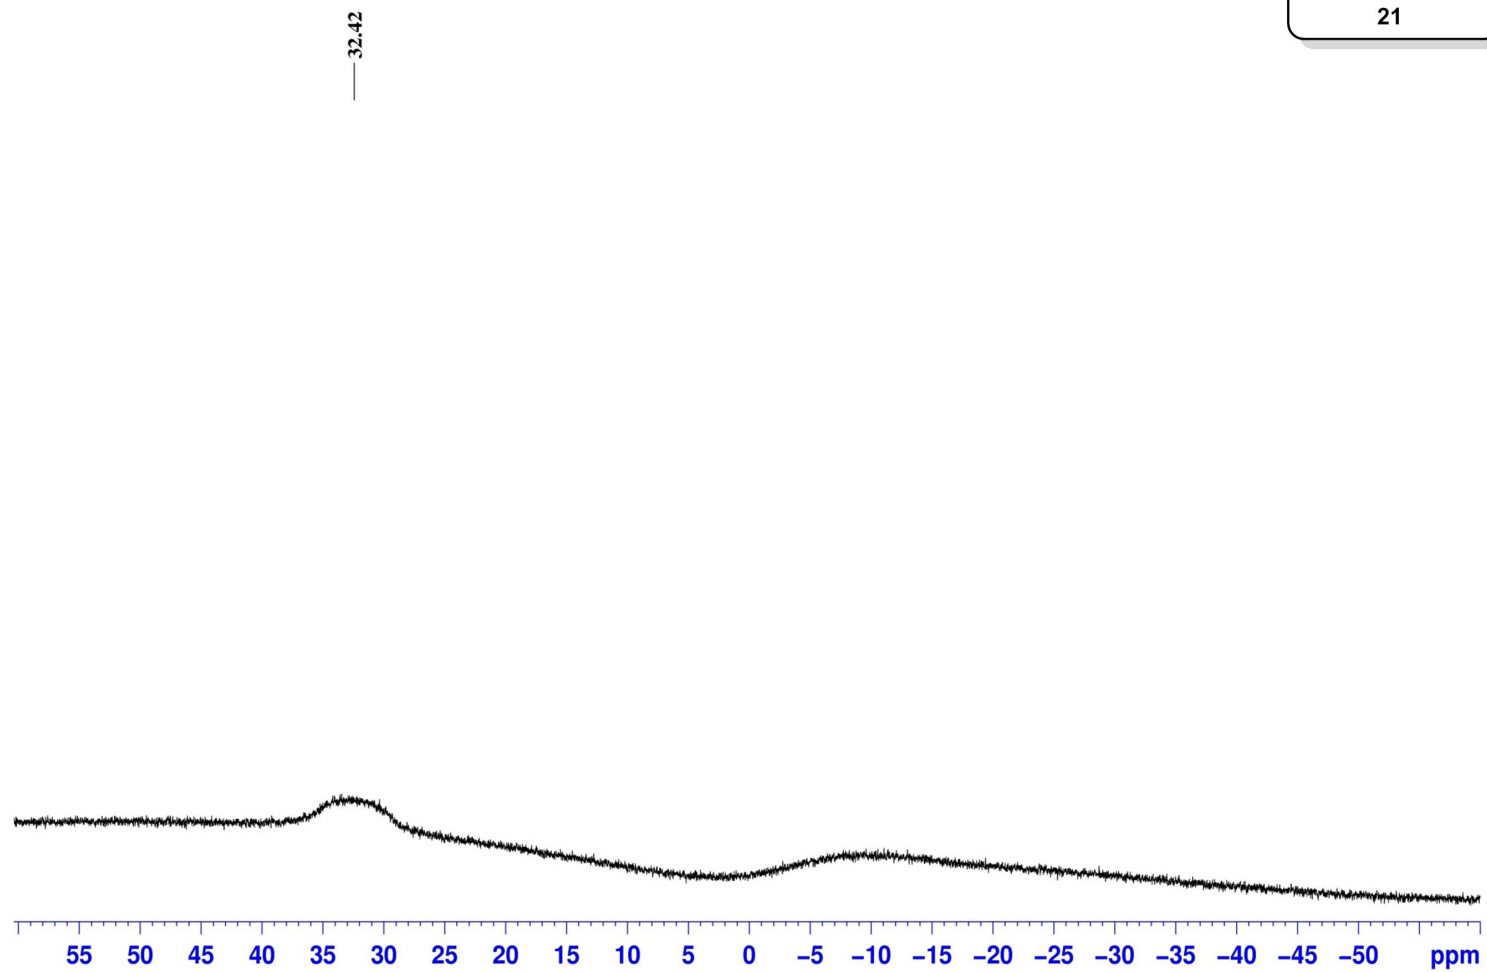

# <sup>1</sup>H NMR

2-(1-(2-chlorophenyl)-3,3-dimethylbutyl)-4,4,5,5-tetramethyl-1,3,2-dioxaborolane  
500 MHz, CDCl<sub>3</sub>

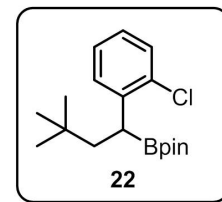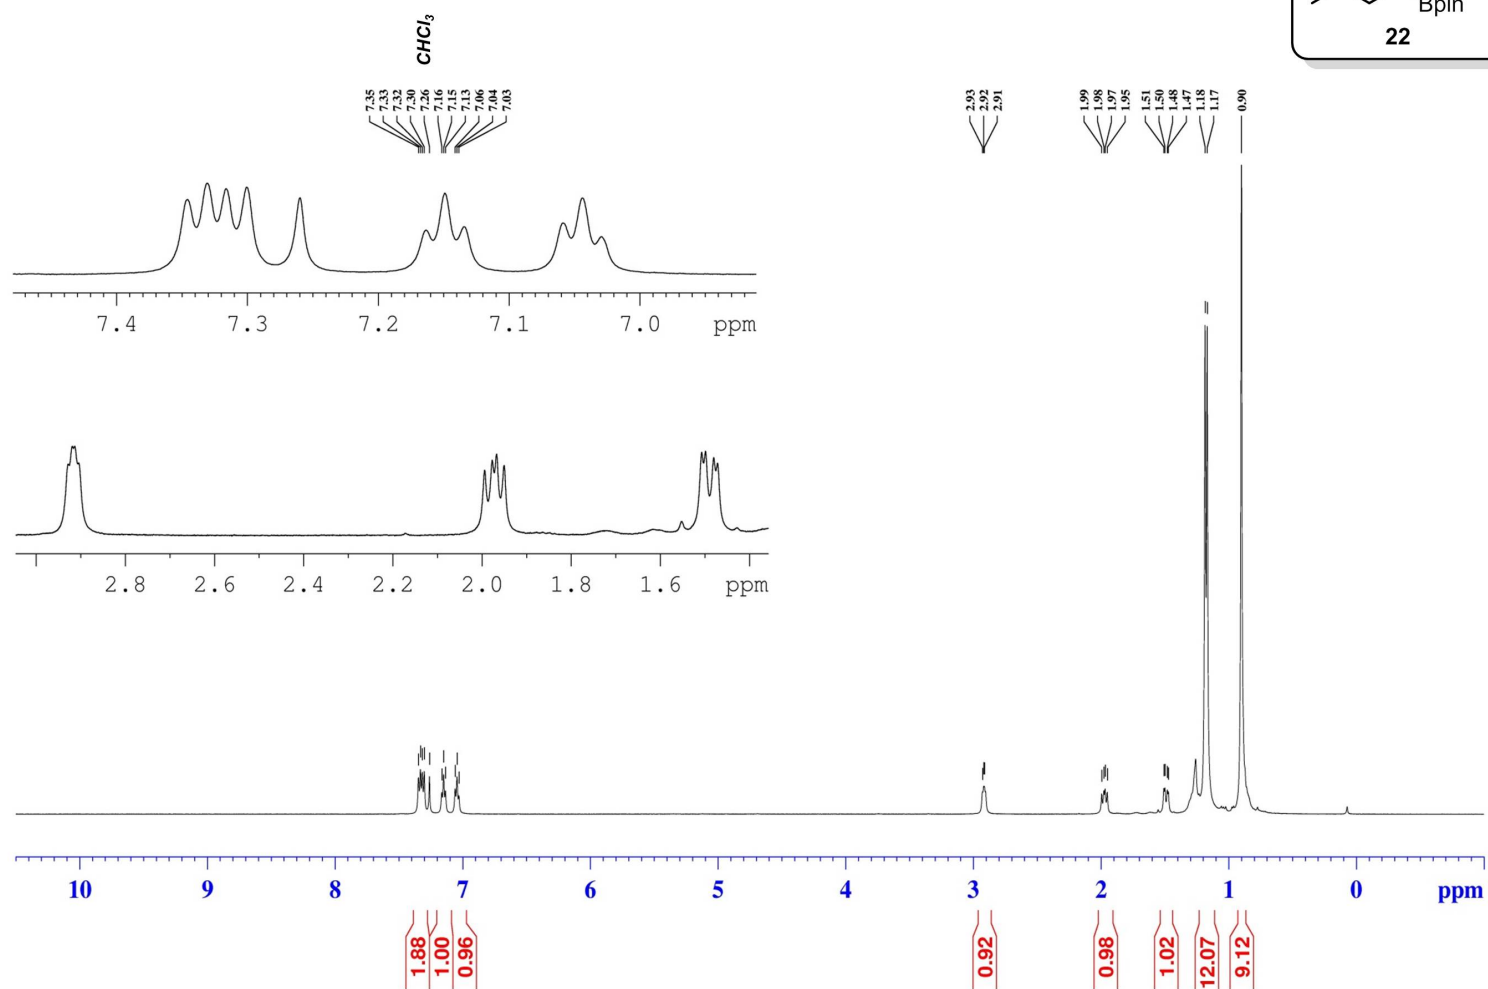

**<sup>13</sup>C NMR**

2-(1-(2-Chlorophenyl)-3,3-dimethylbutyl)-4,4,5,5-tetramethyl-1,3,2-dioxaborolane  
125 MHz, CDCl<sub>3</sub>

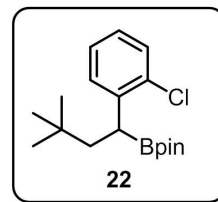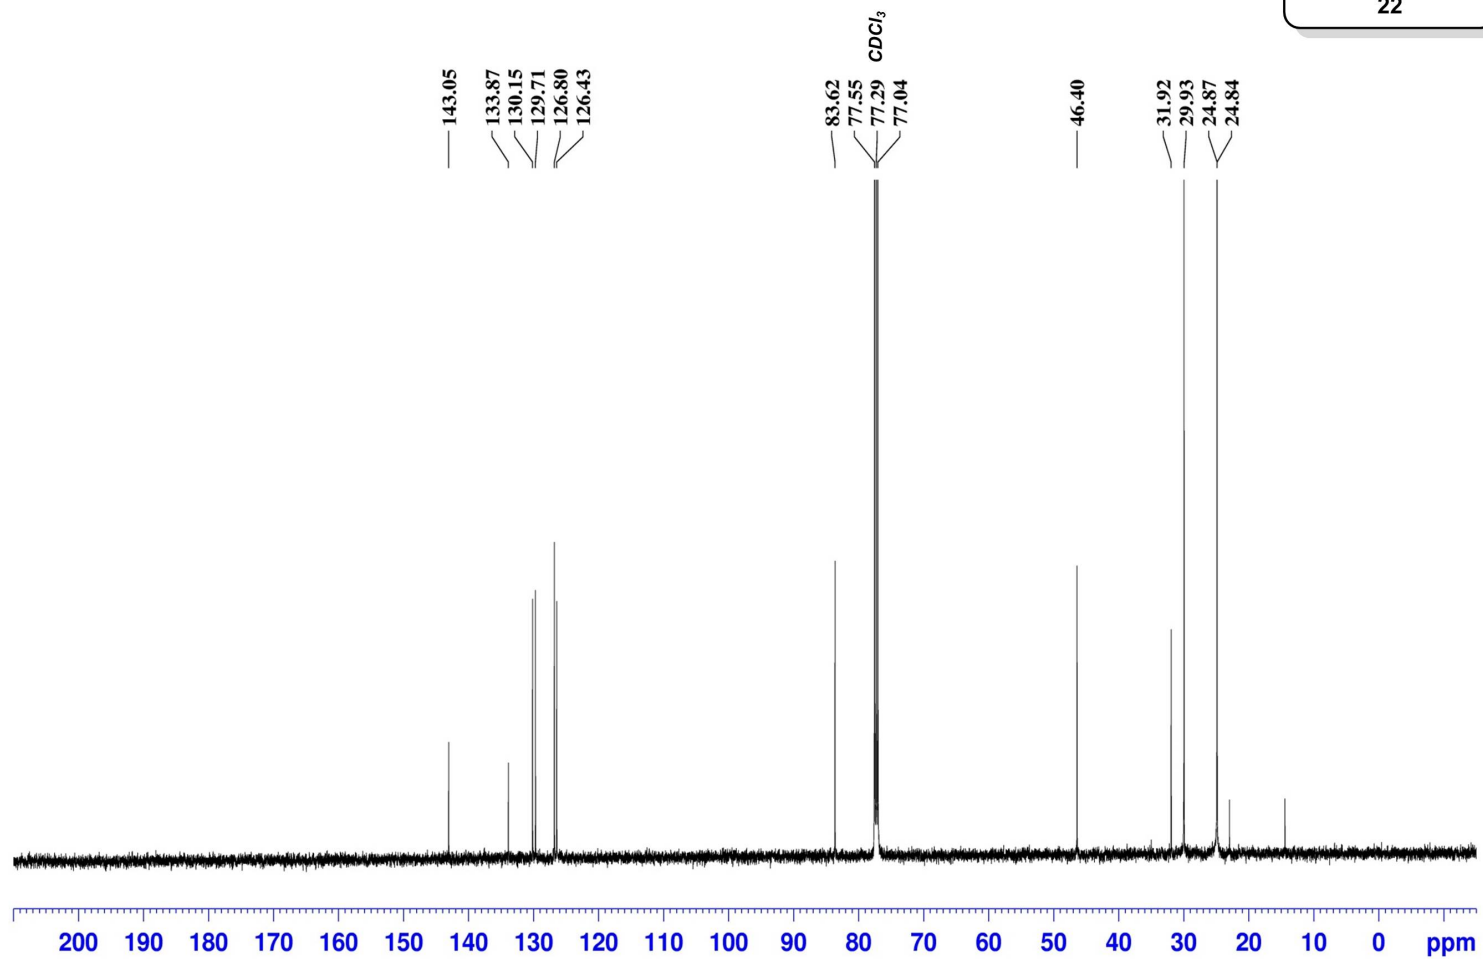

**<sup>11</sup>B NMR**

2-(1-(2-chlorophenyl)-3,3-dimethylbutyl)-4,4,5,5-tetramethyl-1,3,2-dioxaborolane  
128 MHz, CDCl<sub>3</sub>

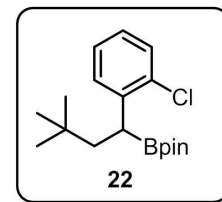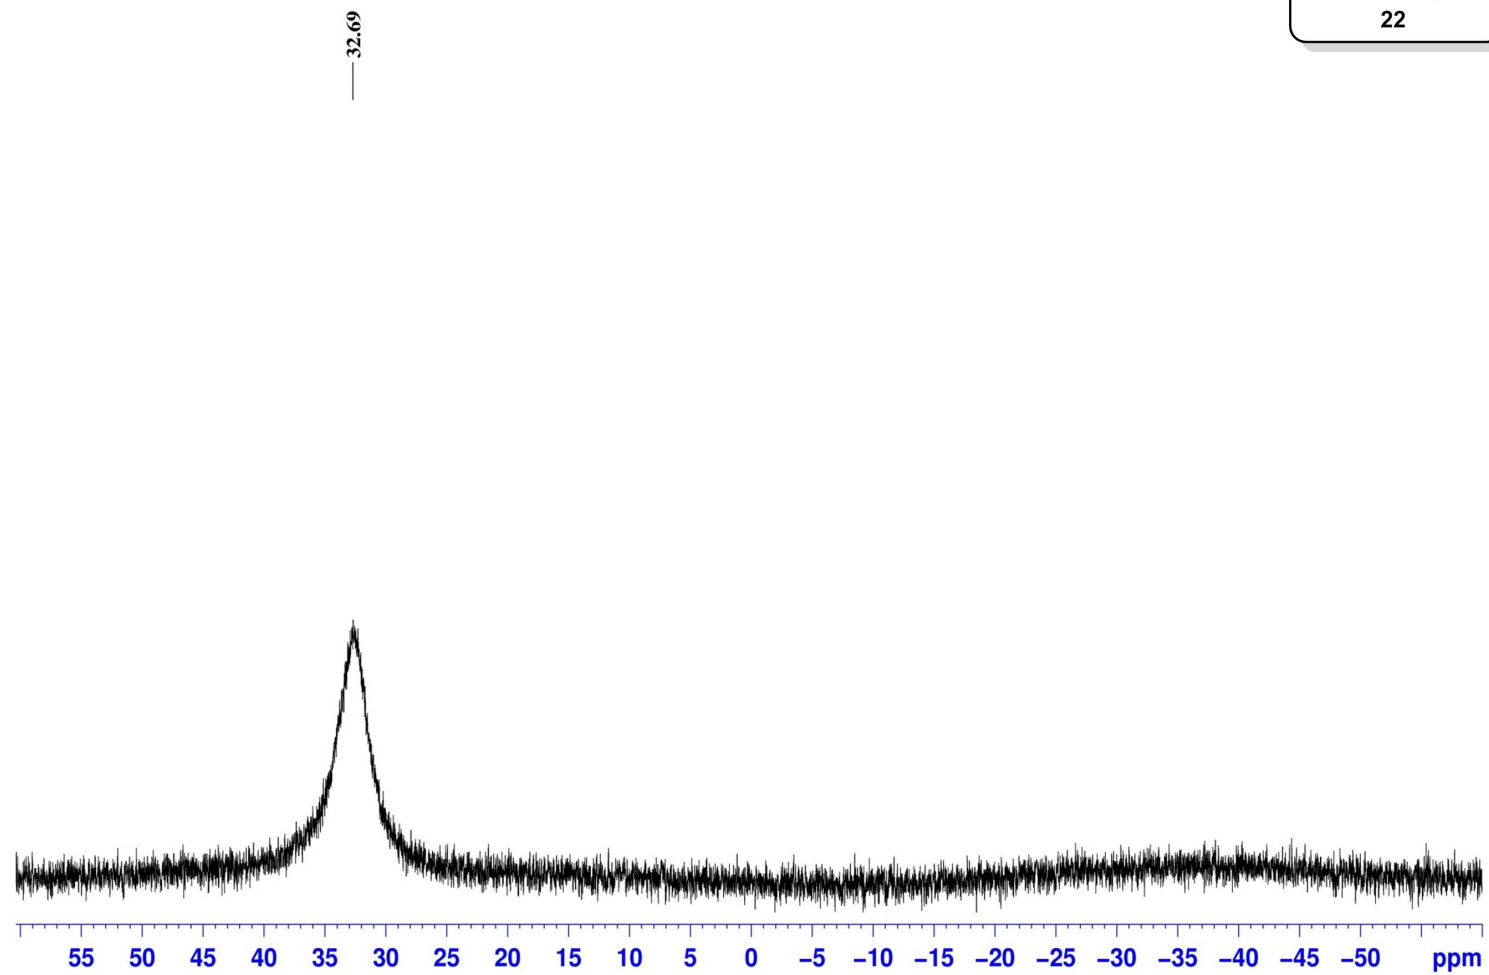

**<sup>1</sup>H NMR**  
2-(1-(3,5-di-tert-butylphenyl)-3,3-dimethylbutyl)-4,4,5,5-tetramethyl-1,3,2-dioxaborolane  
500 MHz, CDCl<sub>3</sub>

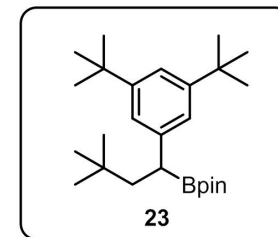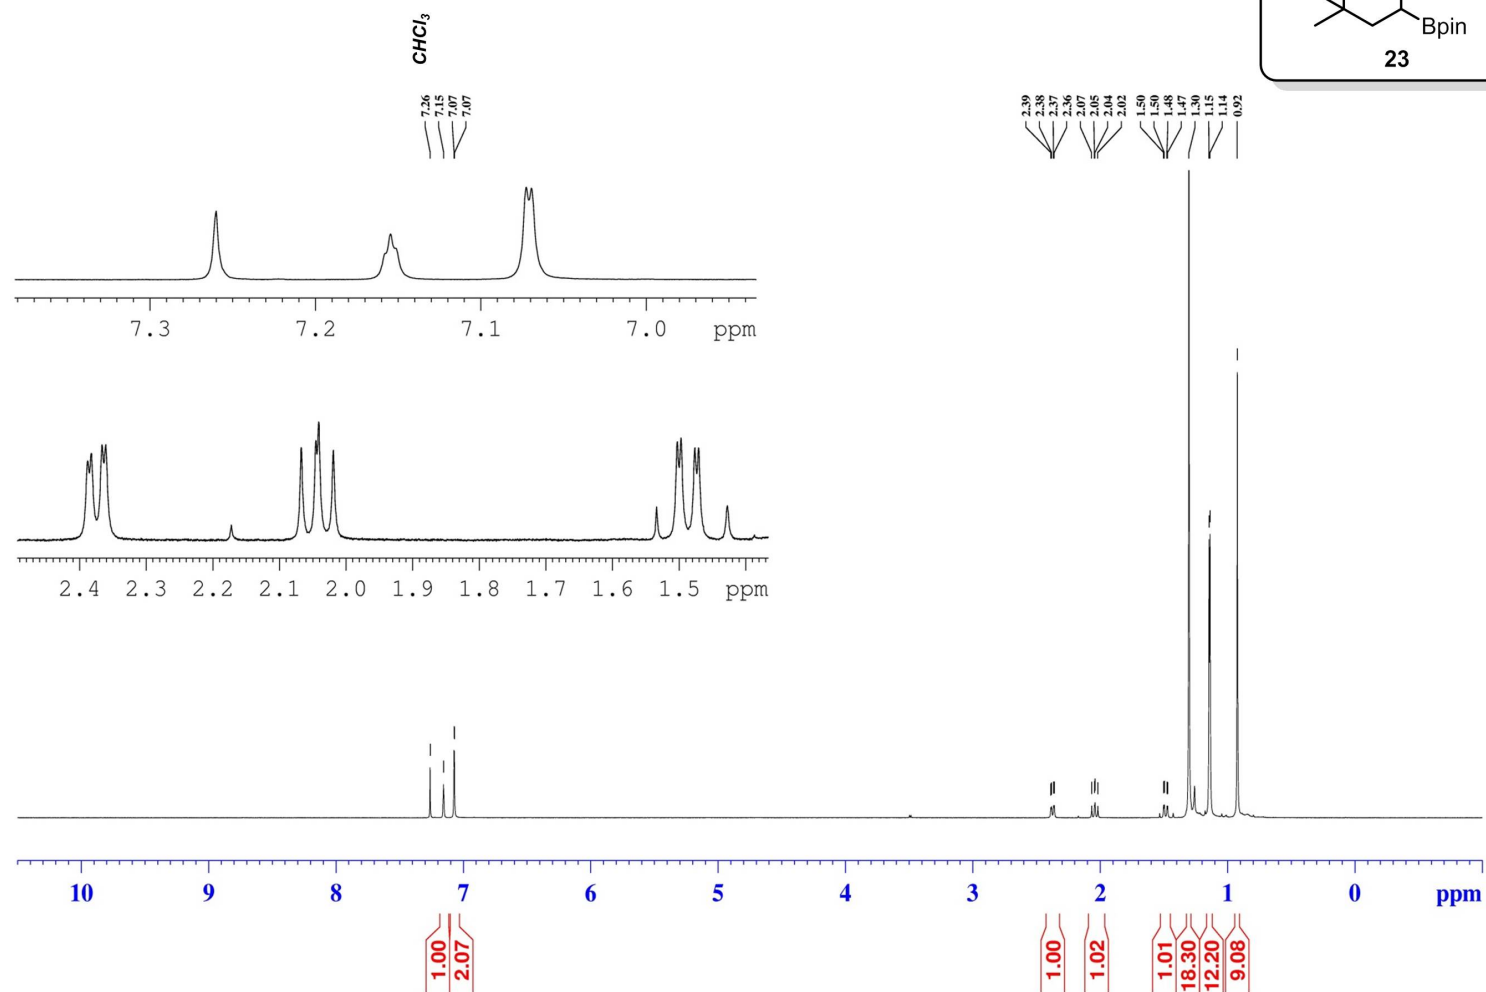

**<sup>13</sup>C NMR**

2-(1-(3,5-Di-tert-butylphenyl)-3,3-dimethylbutyl)-4,4,5,5-tetramethyl-1,3,2-dioxaborolane  
125 MHz, CDCl<sub>3</sub>

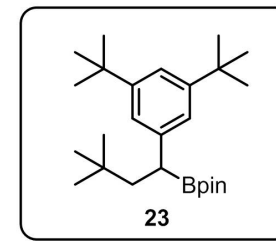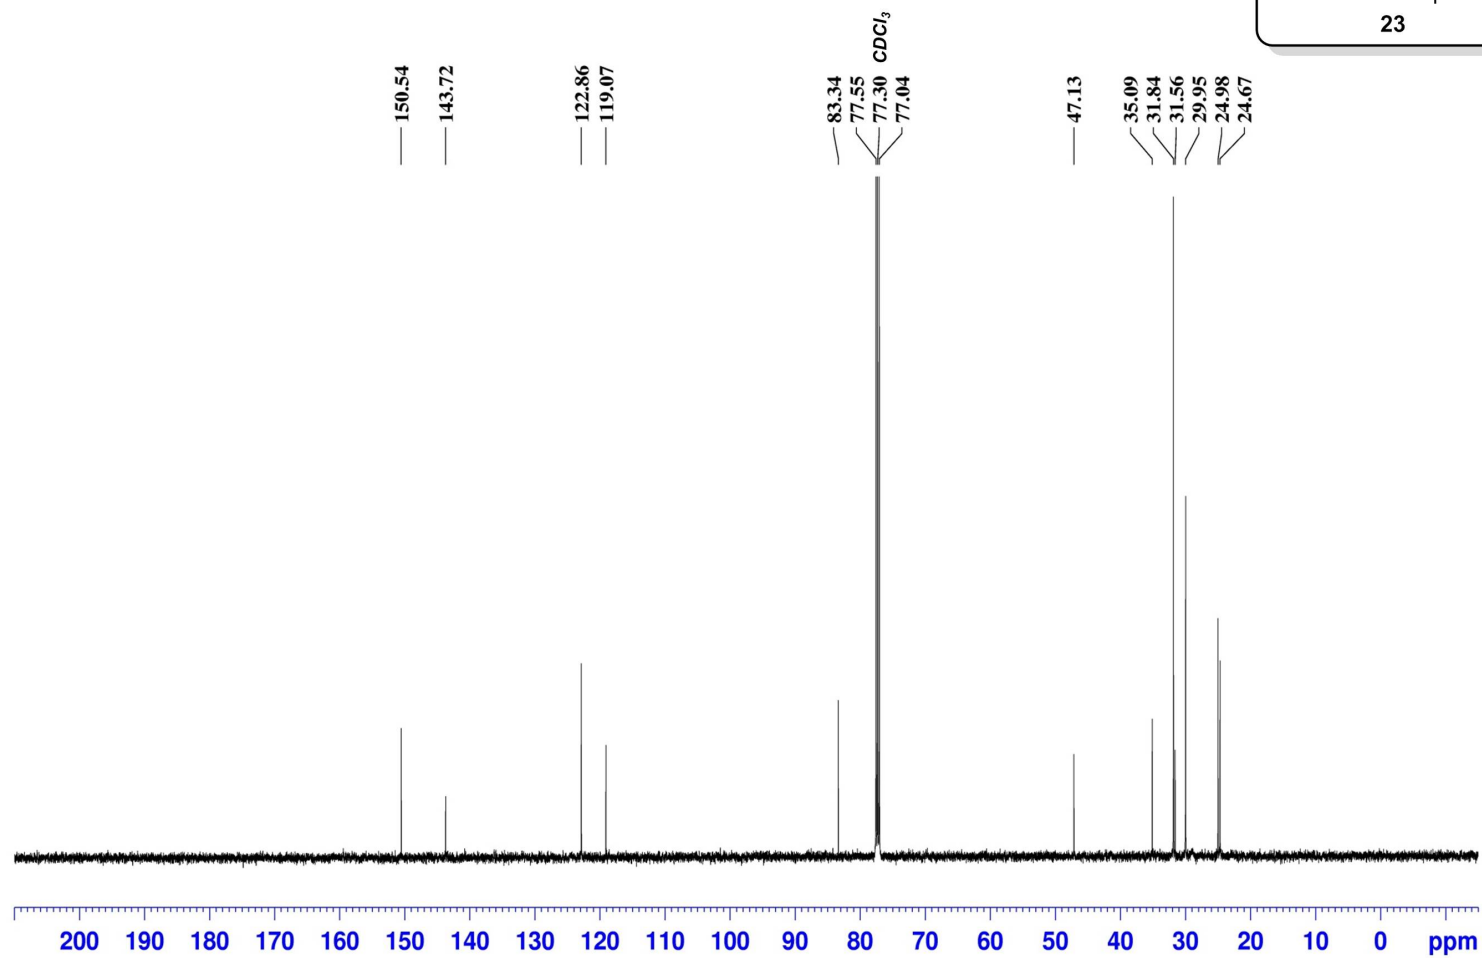



**<sup>11</sup>B NMR**

2-(1-(3,5-di-tert-butylphenyl)-3,3-dimethylbutyl)-4,4,5,5-tetramethyl-1,3,2-dioxaborolane  
128 MHz, CDCl<sub>3</sub>

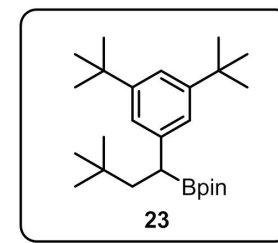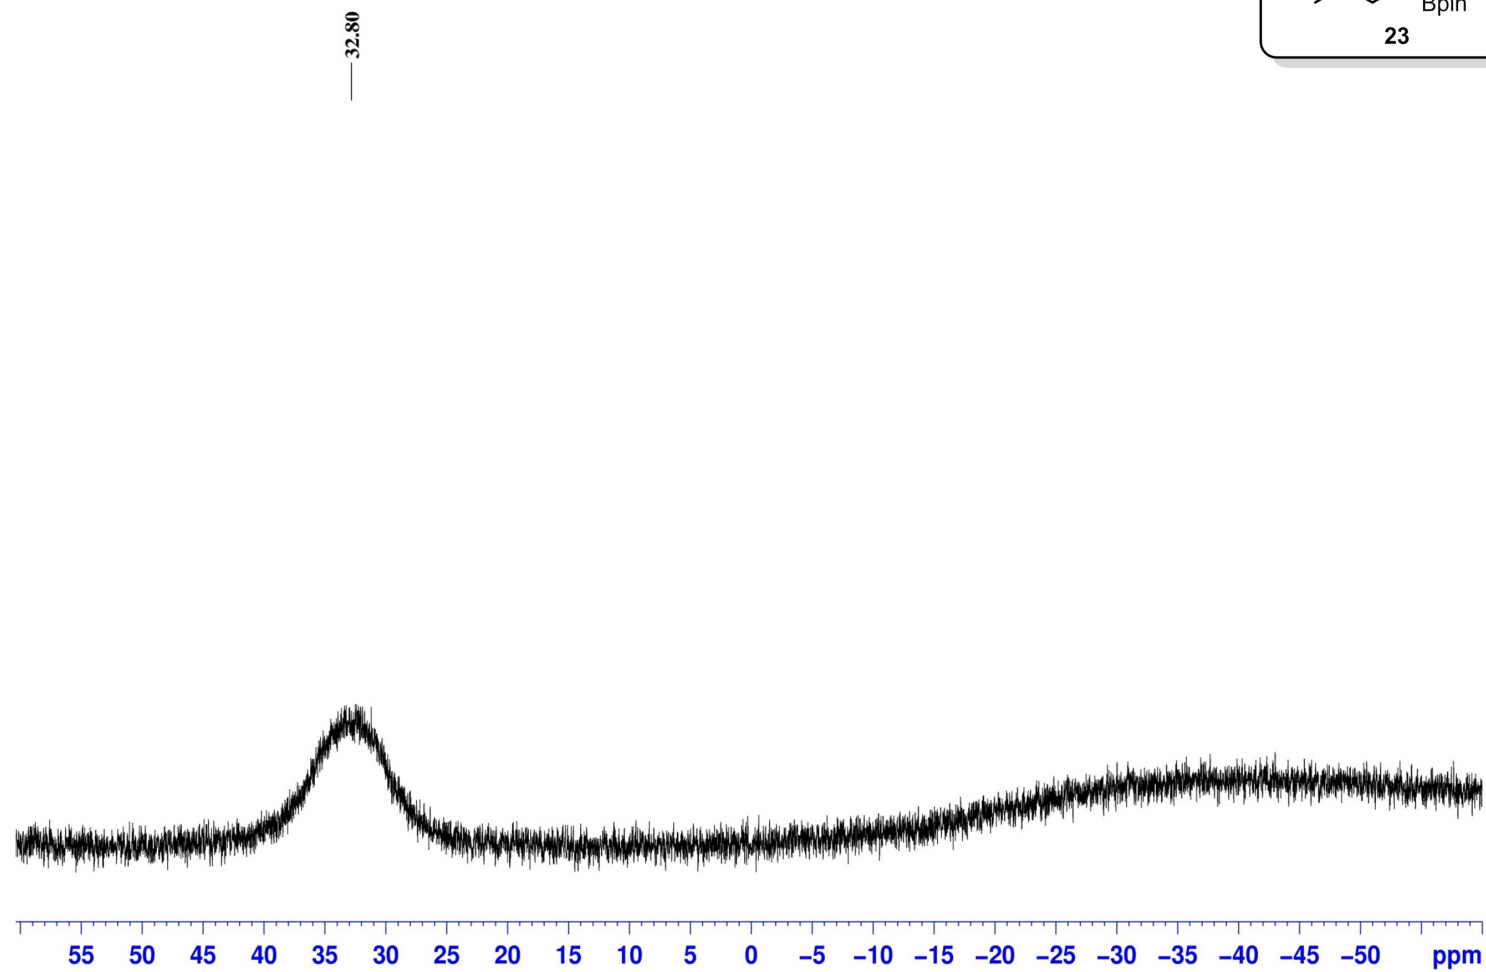

**<sup>1</sup>H NMR**  
2-(1-(3,5-dimethoxyphenyl)-3,3-dimethylbutyl)-4,4,5,5-tetramethyl-1,3,2-dioxaborolane  
500 MHz, CDCl<sub>3</sub>

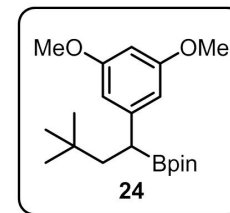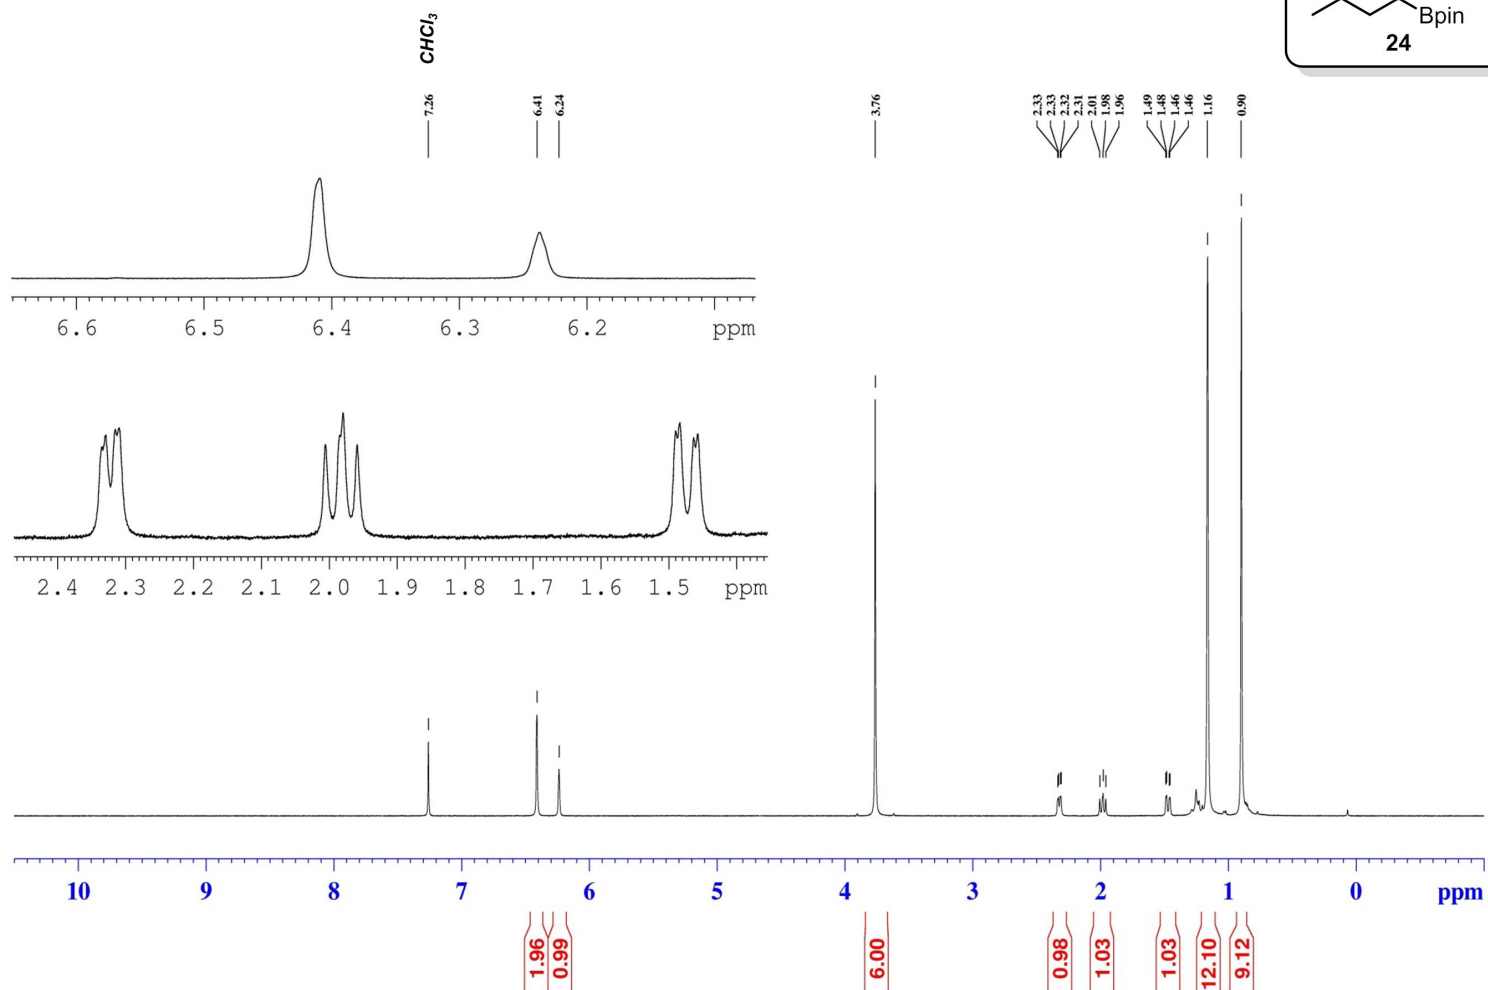

<sup>13</sup>C NMR

2-(1-(3,5-Dimethoxyphenyl)-3,3-dimethylbutyl)-4,4,5,5-tetramethyl-1,3,2-dioxaborolane  
125 MHz, CDCl<sub>3</sub>

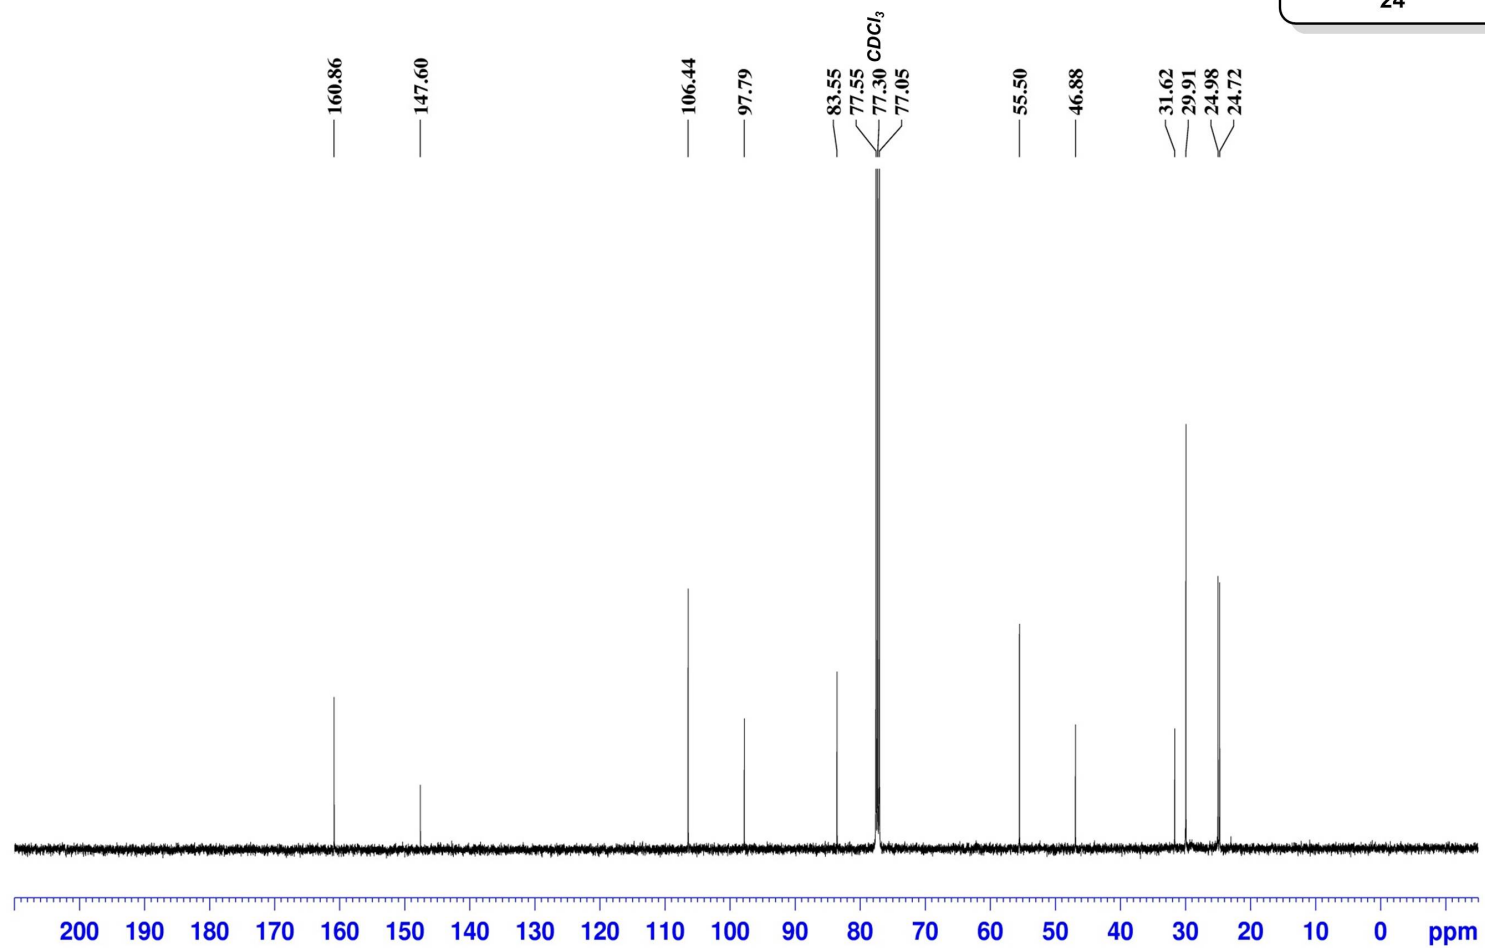

**<sup>11</sup>B NMR**

2-(1-(3,5-dimethoxyphenyl)-3,3-dimethylbutyl)-4,4,5,5-tetramethyl-1,3,2-dioxaborolane  
128 MHz, CDCl<sub>3</sub>

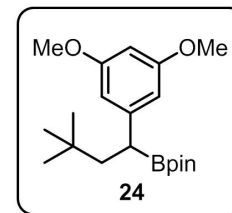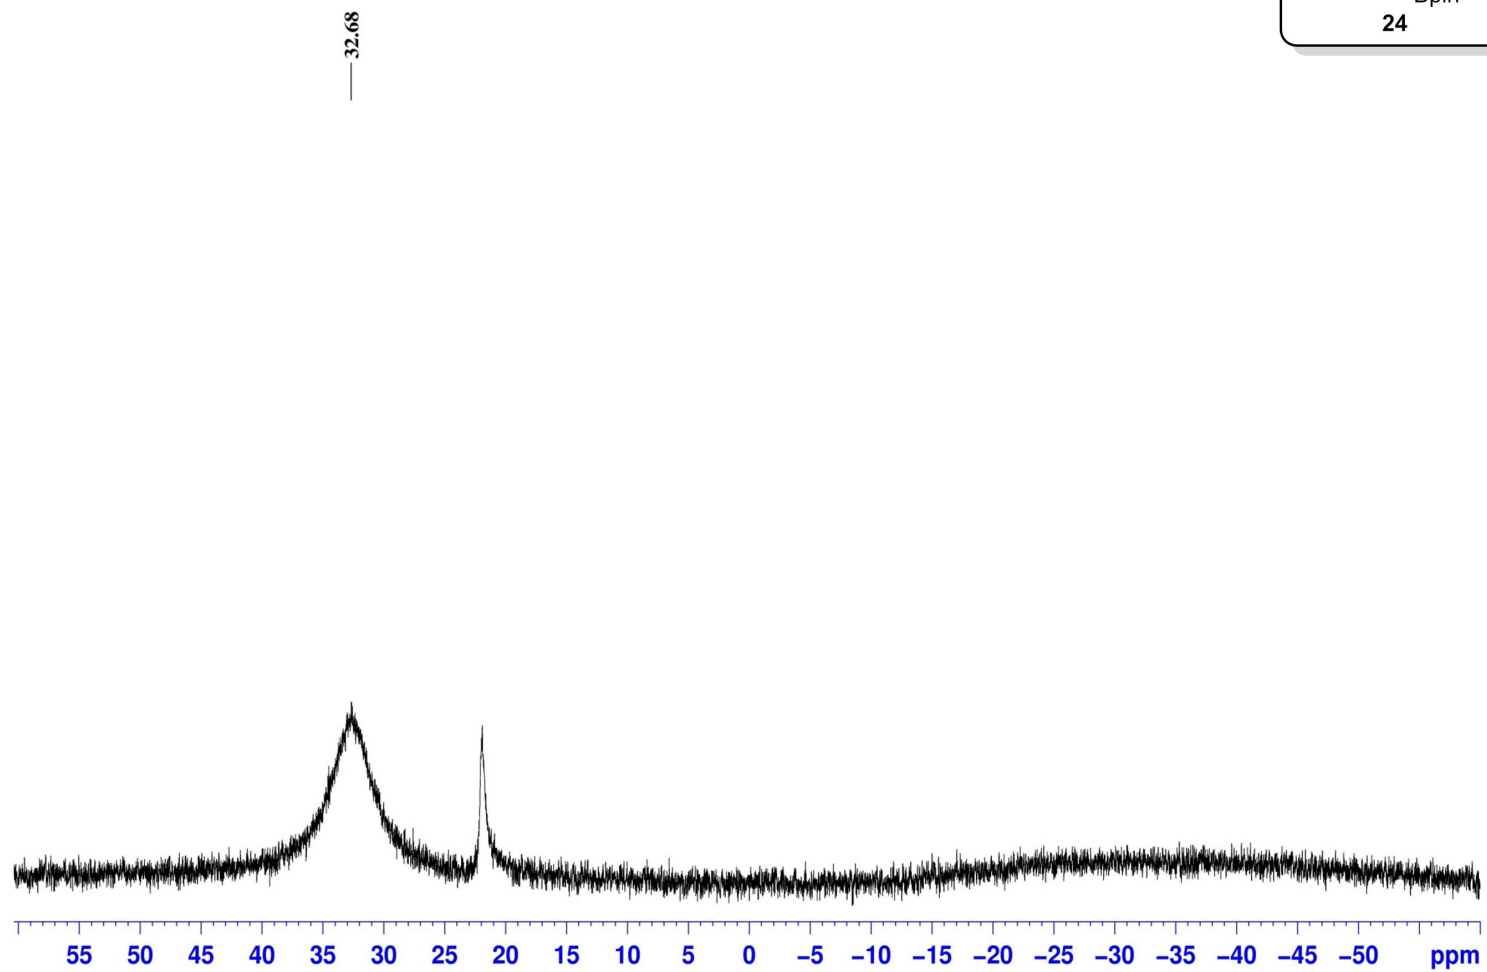

# <sup>1</sup>H NMR

2-(3,3-dimethyl-1-(4-(1-(trifluoromethyl)cyclopropyl)phenyl)butyl)-4,4,5,5-tetramethyl-1,3,2-dioxaborolane  
500 MHz, CDCl<sub>3</sub>

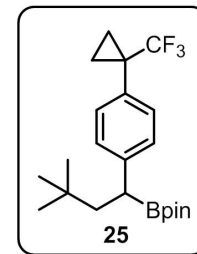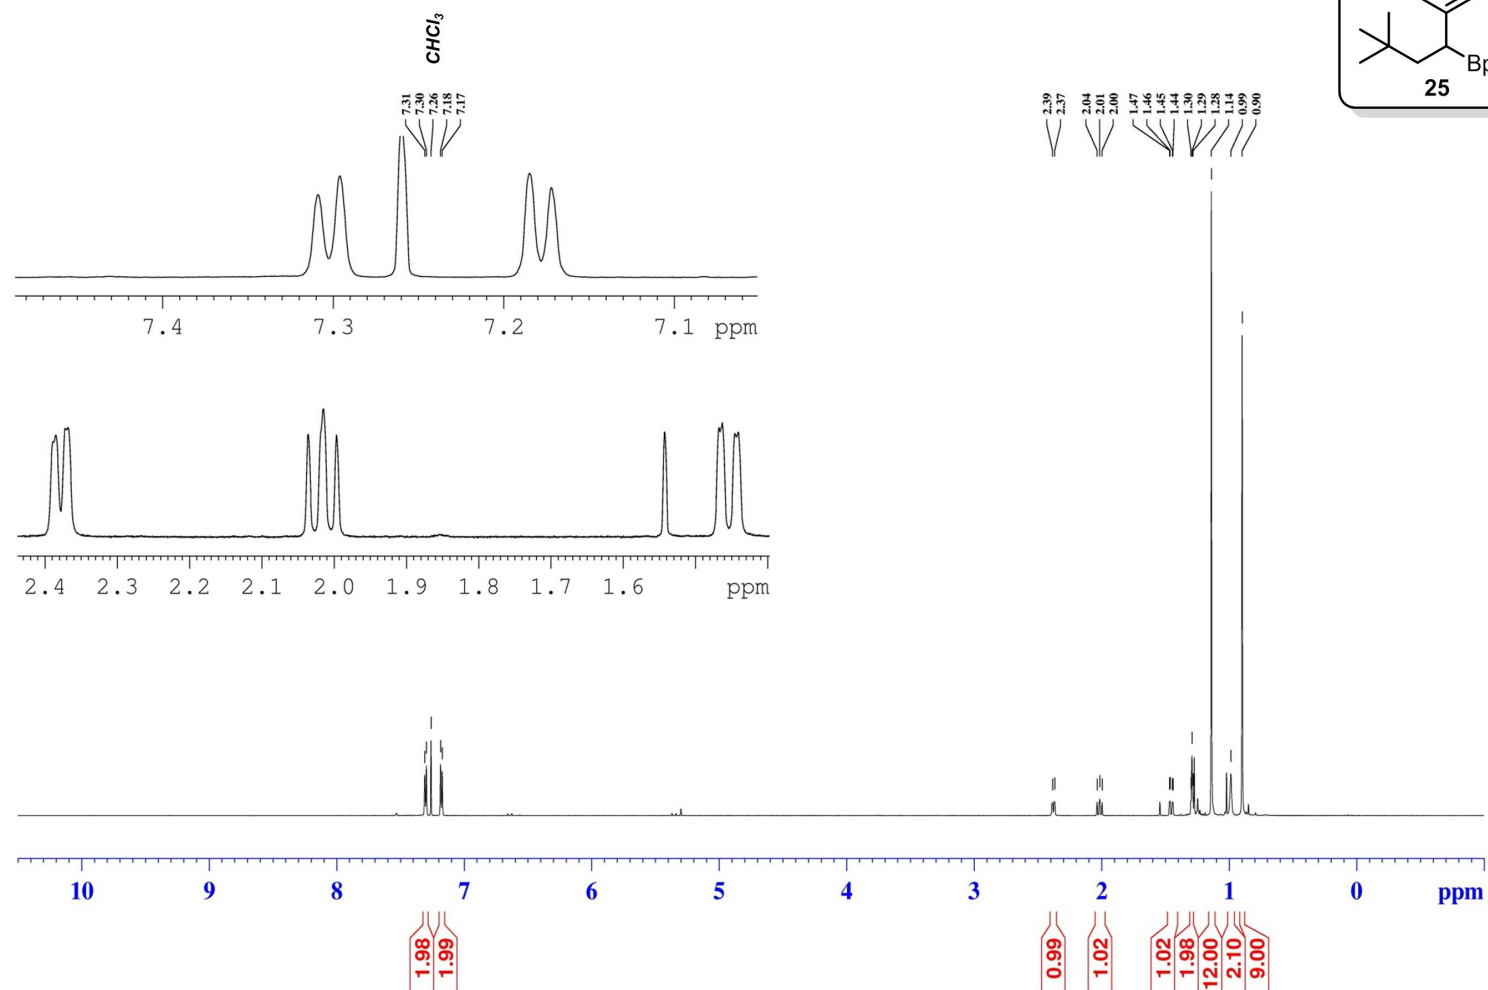

S221

# <sup>13</sup>C NMR

2-(3,3-Dimethyl-1-(4-(1-(trifluoromethyl)cyclopropyl)phenyl)butyl)-4,4,5,5-tetramethyl-1,3,2-dioxaborolane  
125 MHz, CDCl<sub>3</sub>

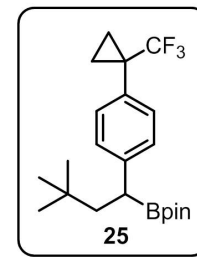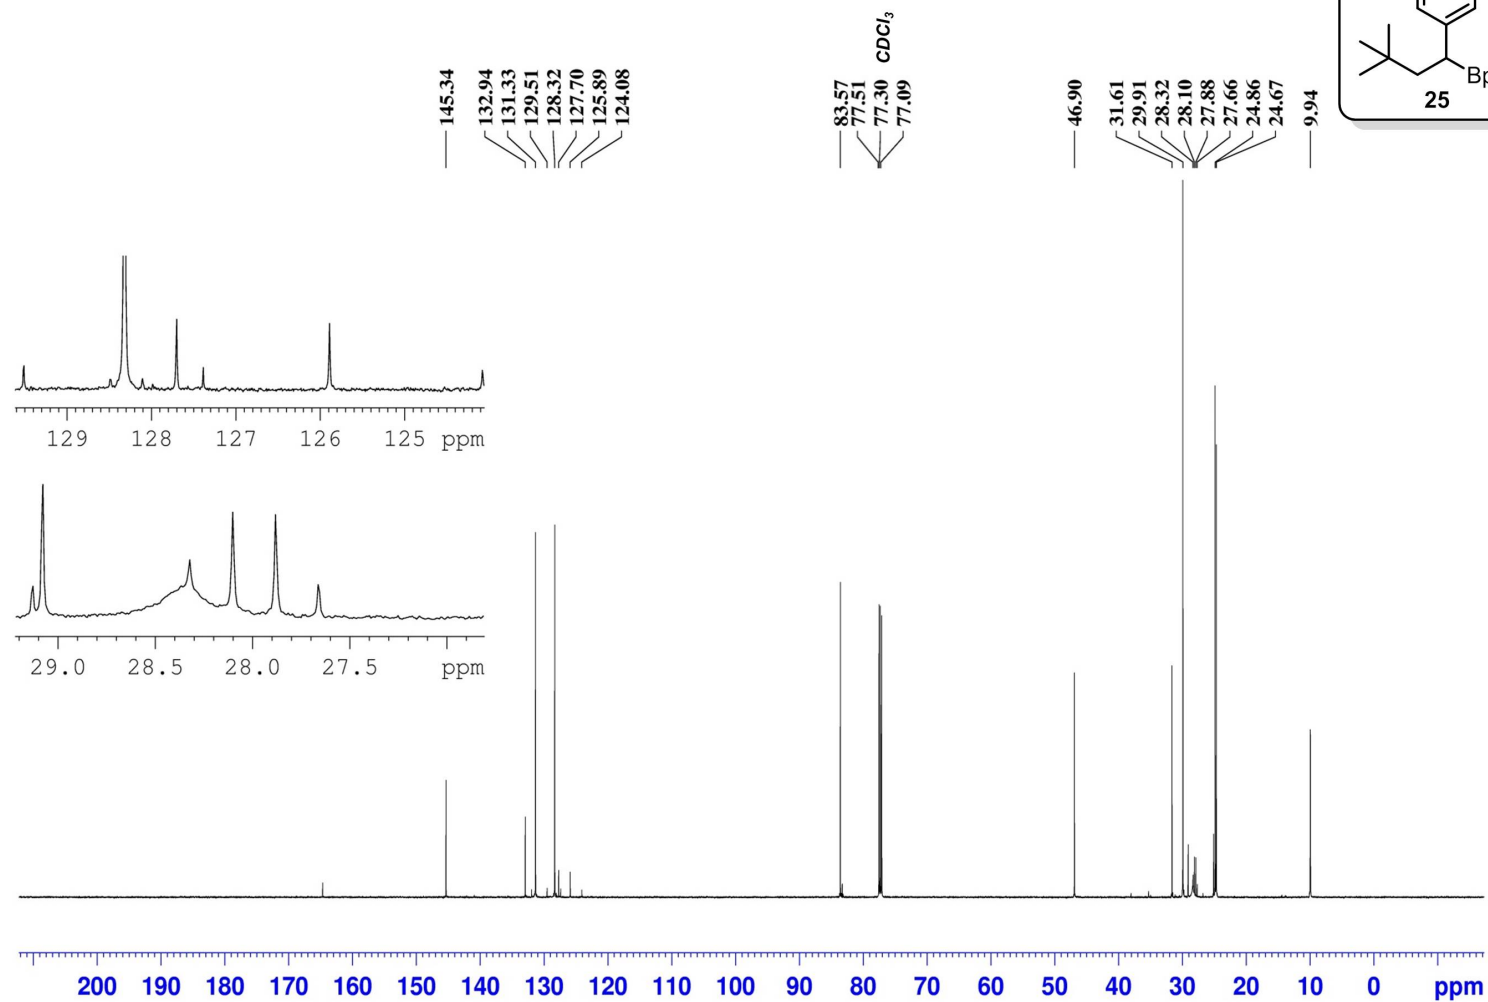

**<sup>19</sup>F NMR**

2-(3,3-dimethyl-1-(4-(1-(trifluoromethyl)cyclopropyl)phenyl)butyl)-4,4,5,5-tetramethyl-1,3,2-dioxaborolane  
471 MHz, CDCl<sub>3</sub>

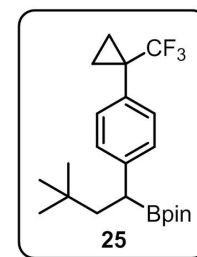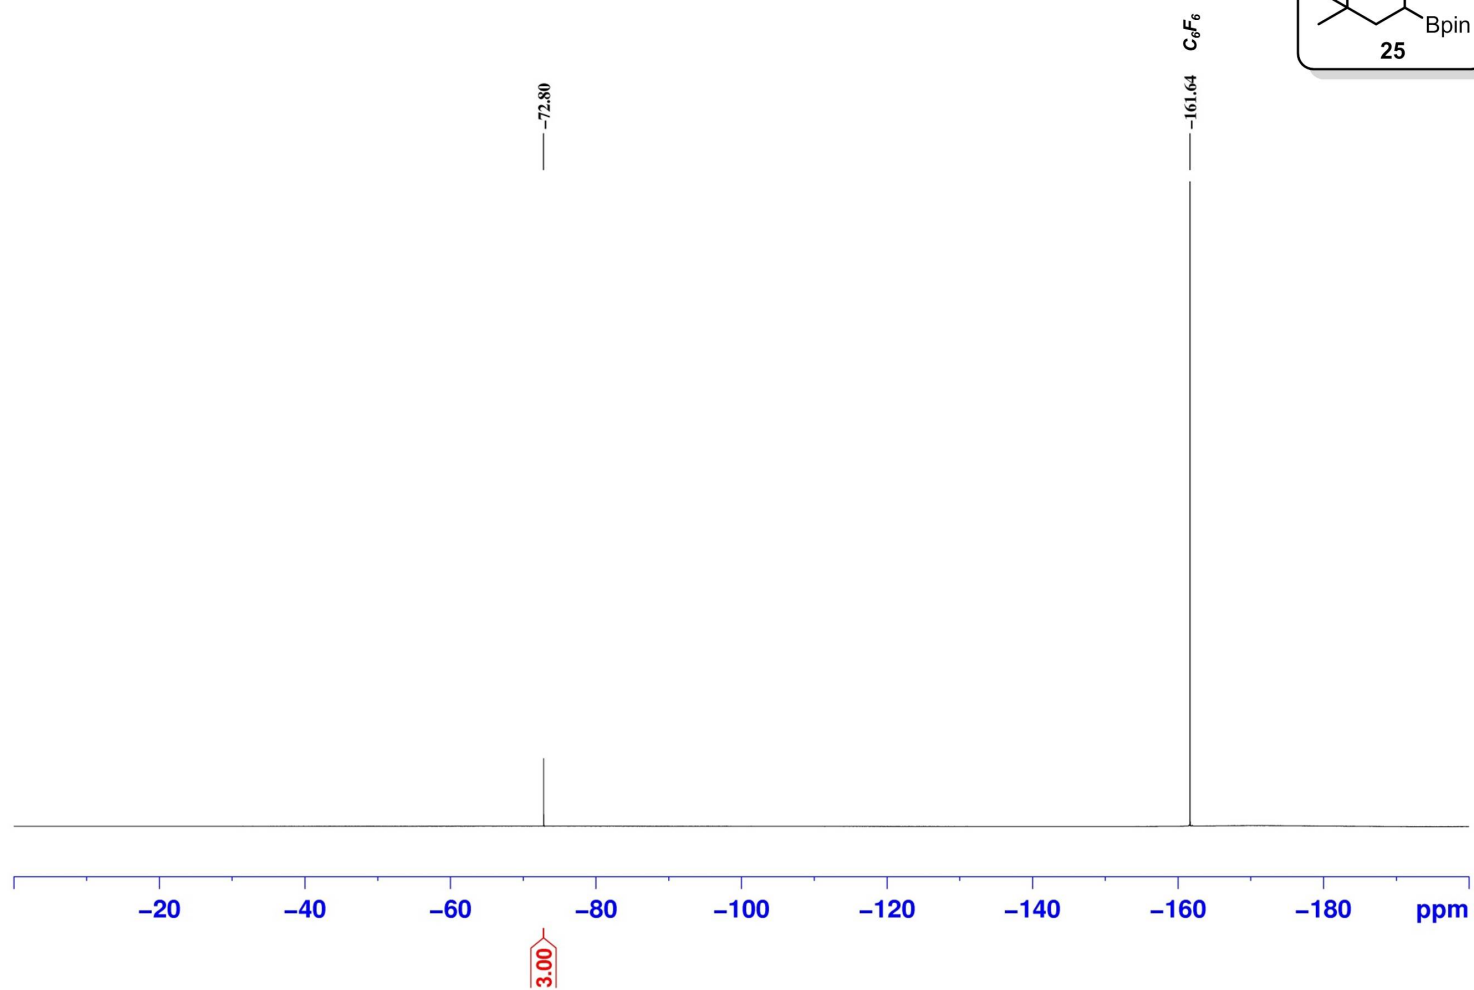

S223

**<sup>11</sup>B NMR**

2-(3,3-dimethyl-1-(4-(1-(trifluoromethyl)cyclopropyl)phenyl)butyl)-4,4,5,5-tetramethyl-1,3,2-dioxaborolane  
128 MHz, CDCl<sub>3</sub>

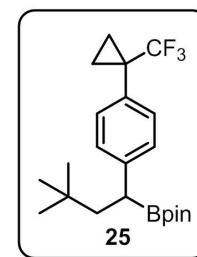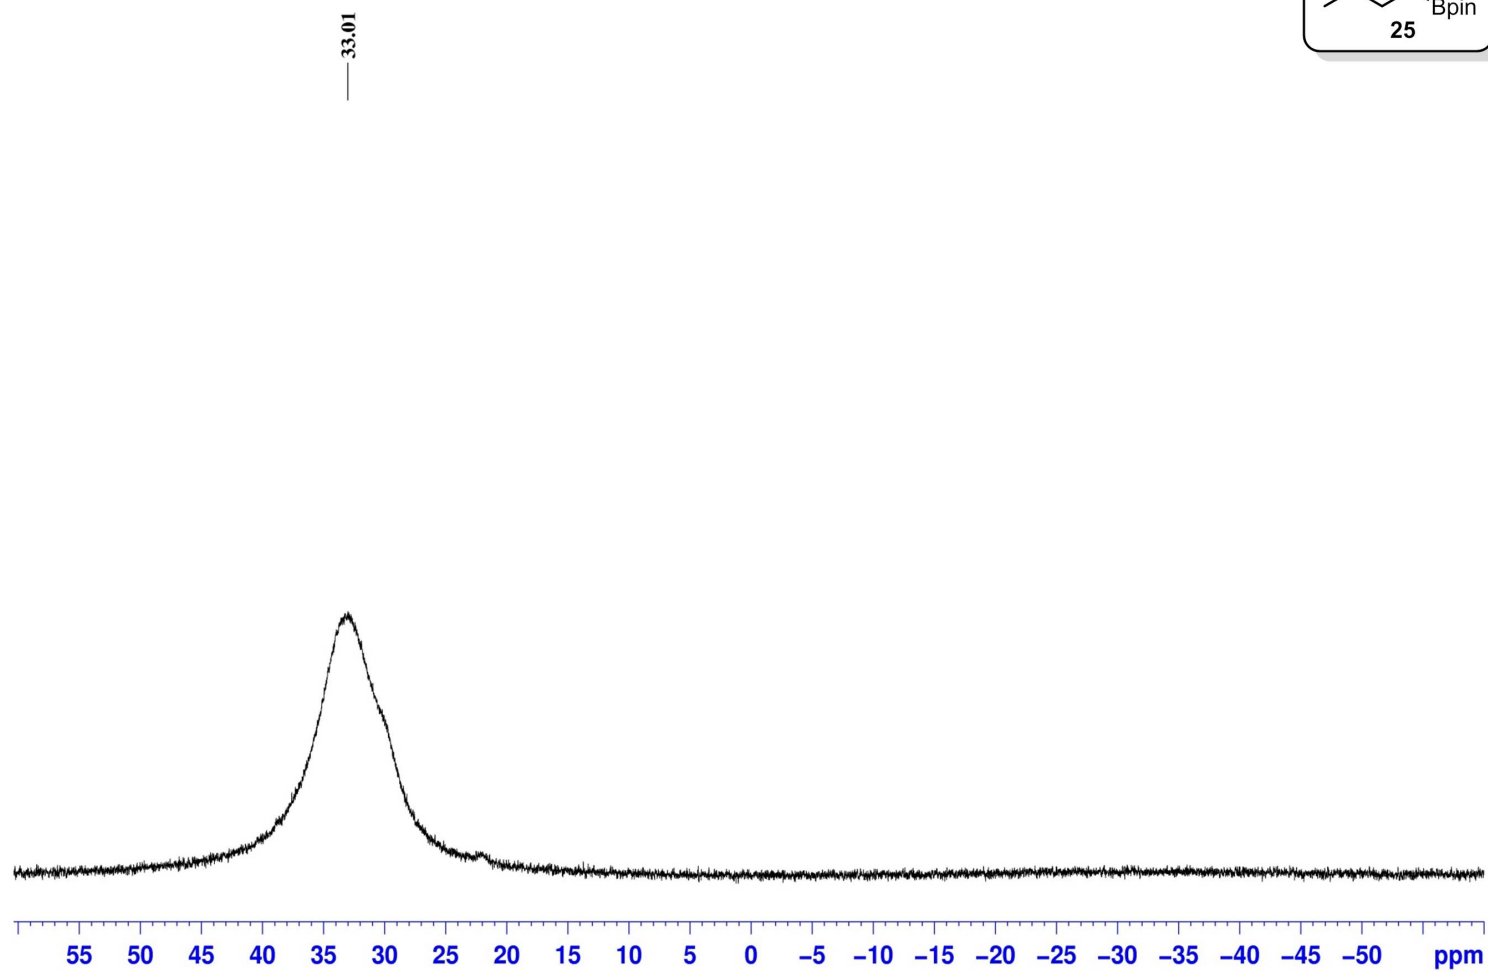



**<sup>1</sup>H NMR**  
5-(3,3-dimethyl-1-(4,4,5,5-tetramethyl-1,3,2-dioxaborolan-2-yl)butyl)isobenzofuran-1(3H)-one  
500 MHz, CDCl<sub>3</sub>

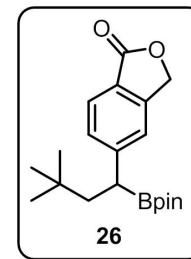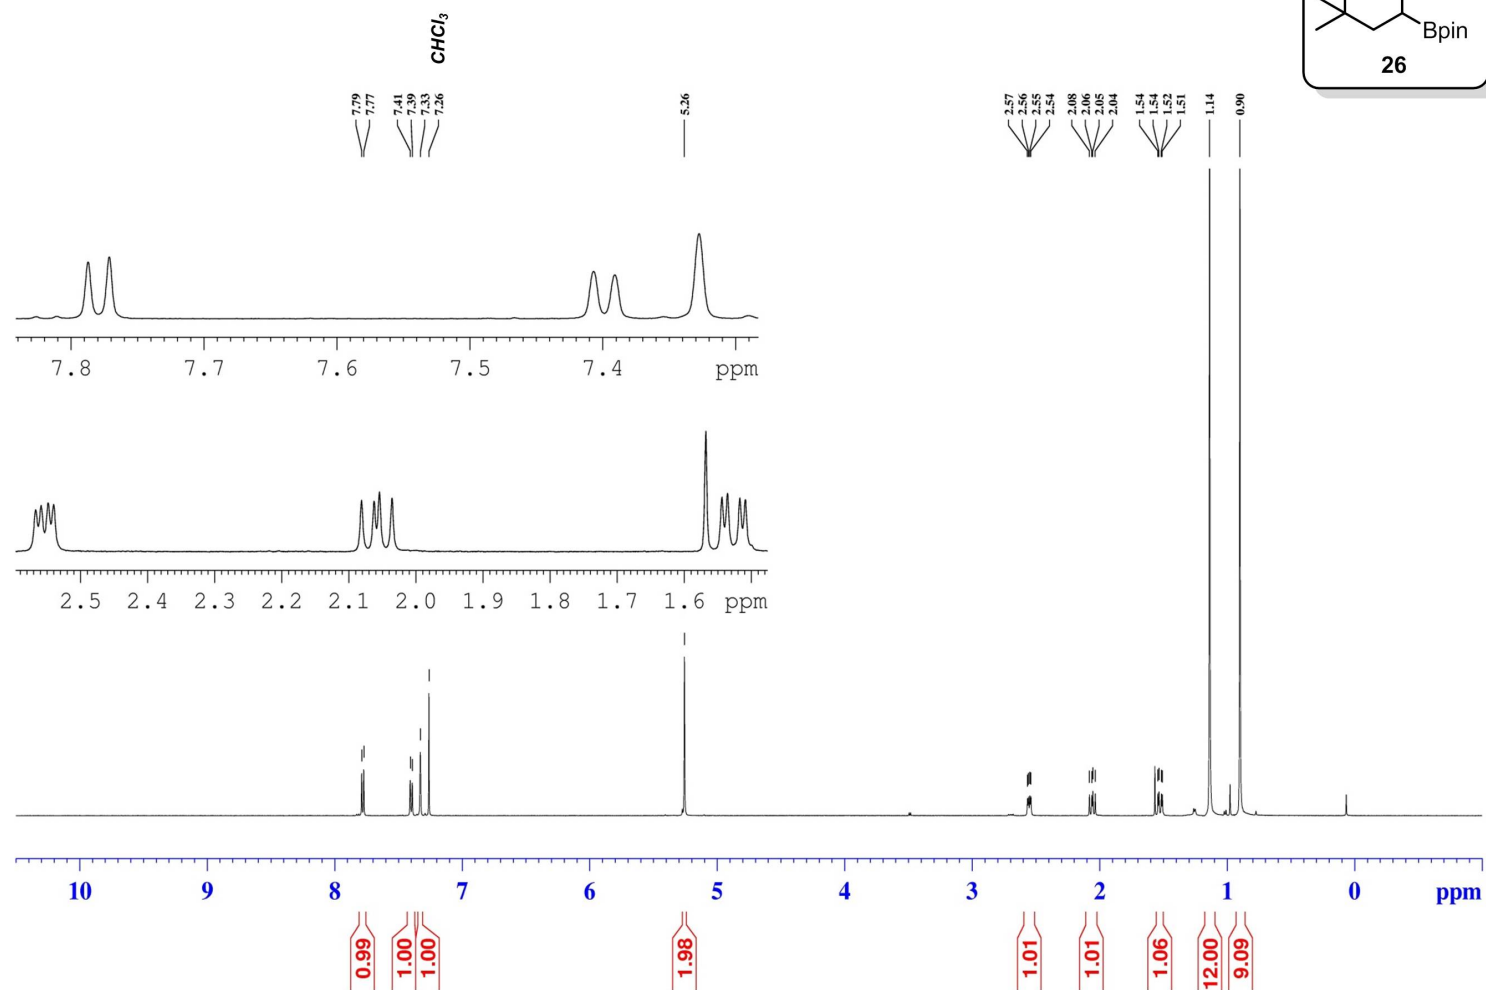

**S225**

**<sup>13</sup>C NMR**

5-(3,3-Dimethyl-1-(4,4,5,5-tetramethyl-1,3,2-dioxaborolan-2-yl)butyl)isobenzofuran-1(3H)-one  
125 MHz, CDCl<sub>3</sub>

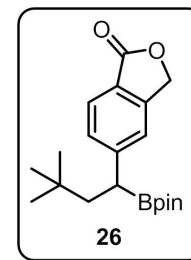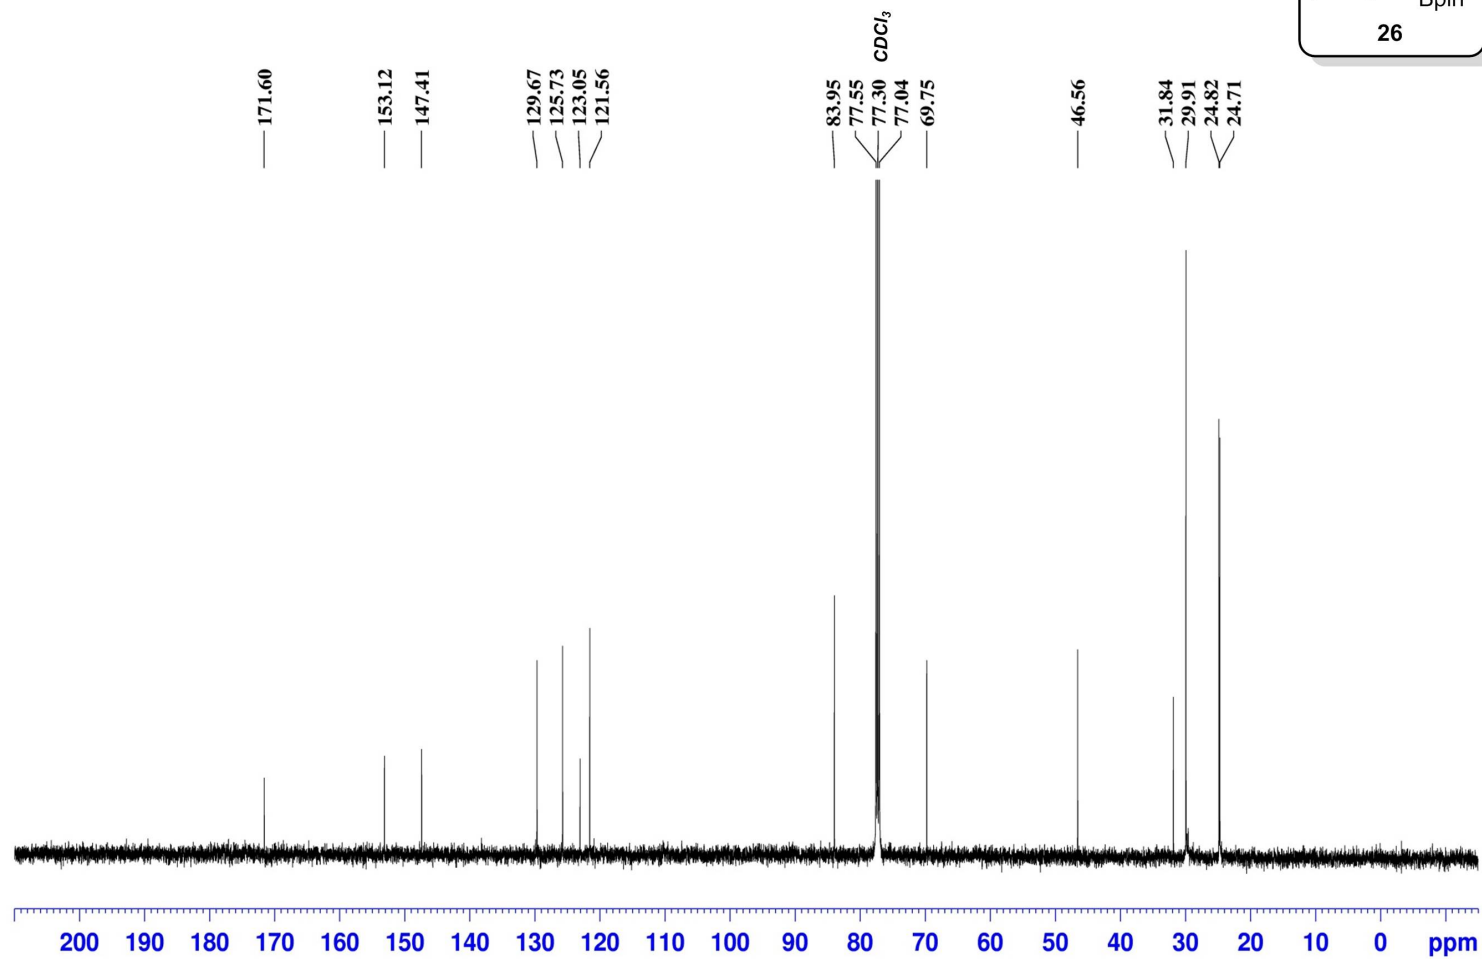

**<sup>11</sup>B NMR**

5-(3,3-dimethyl-1-(4,4,5,5-tetramethyl-1,3,2-dioxaborolan-2-yl)butyl)isobenzofuran-1(3H)-one  
128 MHz, CDCl<sub>3</sub>

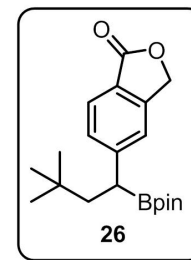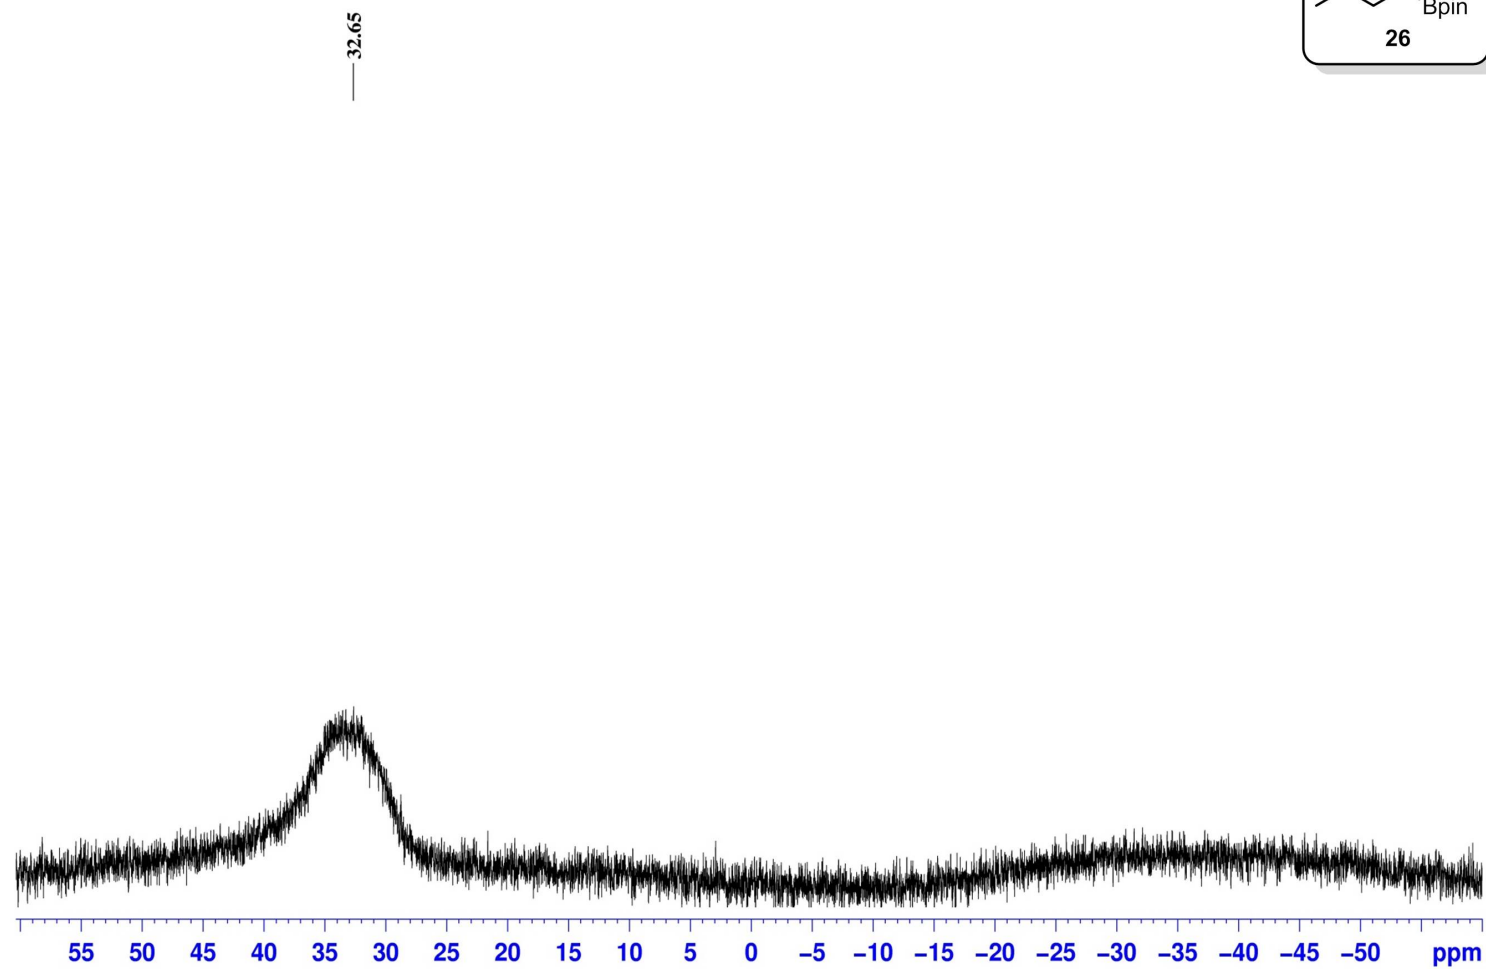

**<sup>1</sup>H NMR**  
2-(1-(4-(1,3-dioxolan-2-yl)phenyl)-3,3-dimethylbutyl)-4,4,5,5-tetramethyl-1,3,2-dioxaborolane  
500 MHz, CDCl<sub>3</sub>

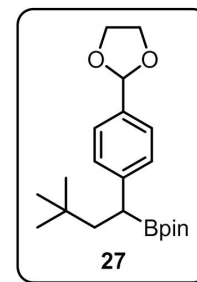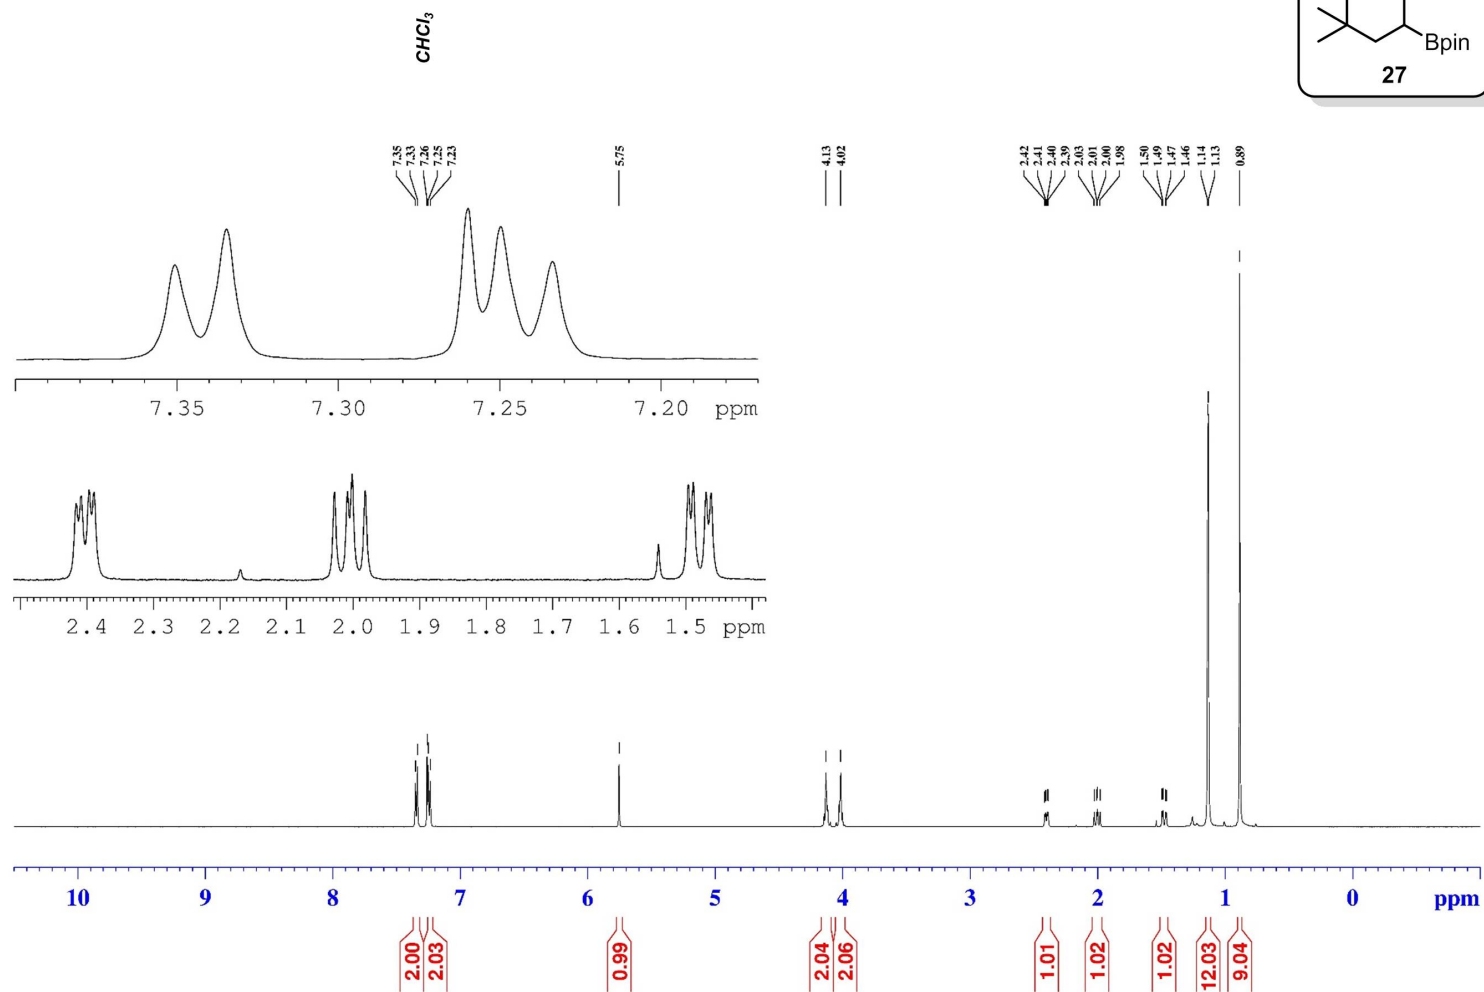

**<sup>13</sup>C NMR**

2-(1-(4-(1,3-Dioxolan-2-yl)phenyl)-3,3-dimethylbutyl)-4,4,5,5-tetramethyl-1,3,2-dioxaborolane  
125 MHz, CDCl<sub>3</sub>

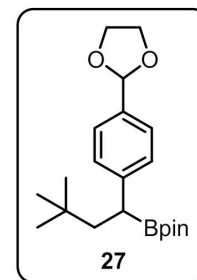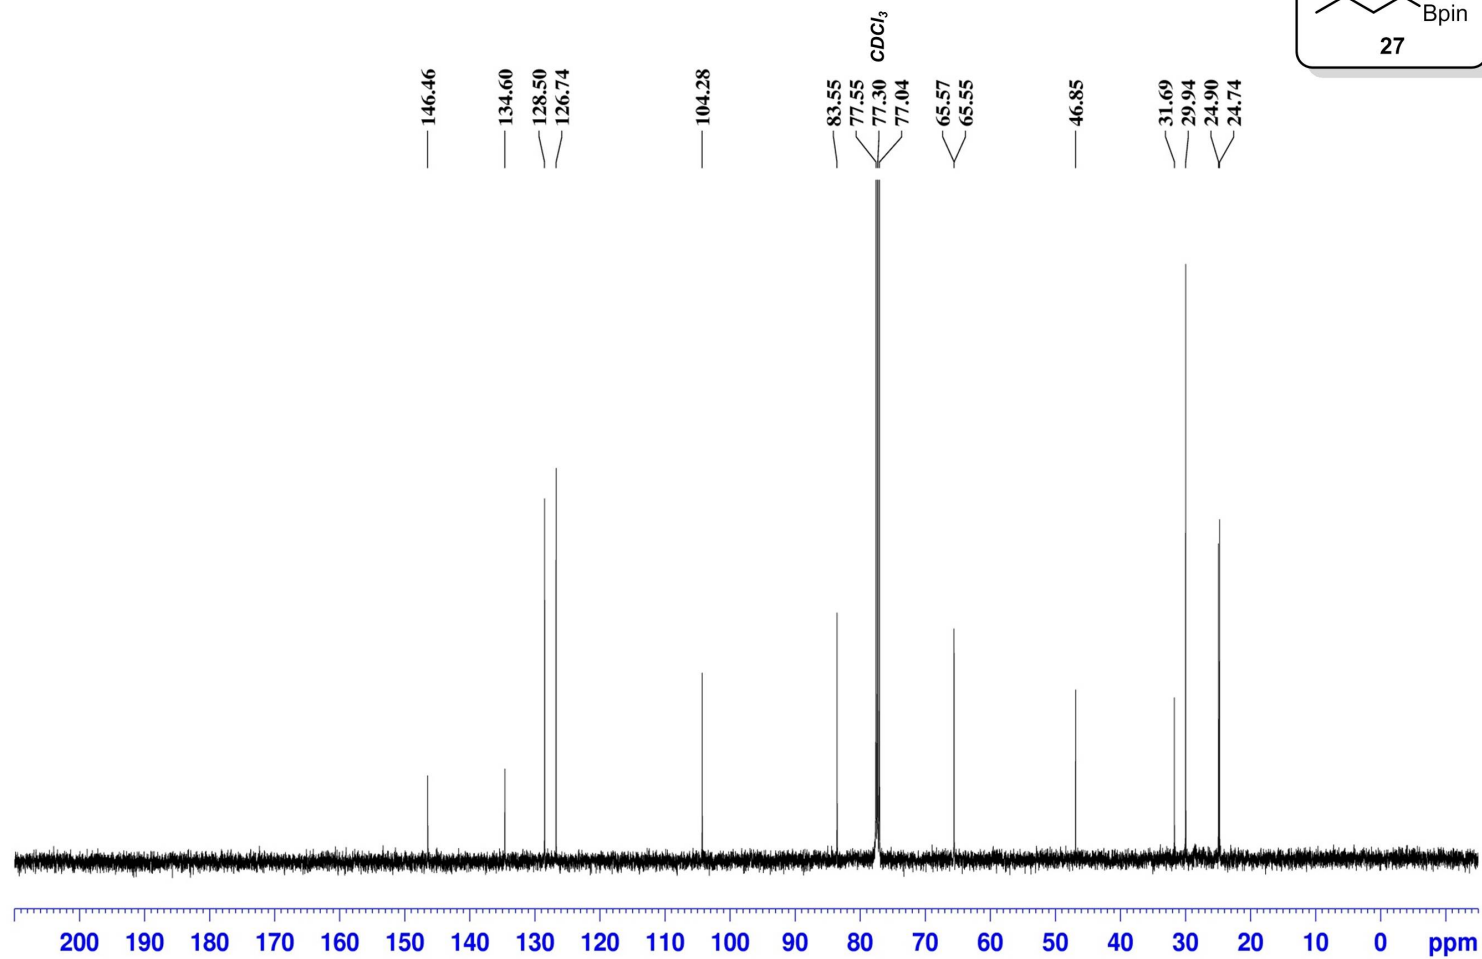

**<sup>11</sup>B NMR**

2-(1-(4-(1,3-dioxolan-2-yl)phenyl)-3,3-dimethylbutyl)-4,4,5,5-tetramethyl-1,3,2-dioxaborolane  
128 MHz, CDCl<sub>3</sub>

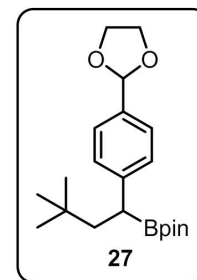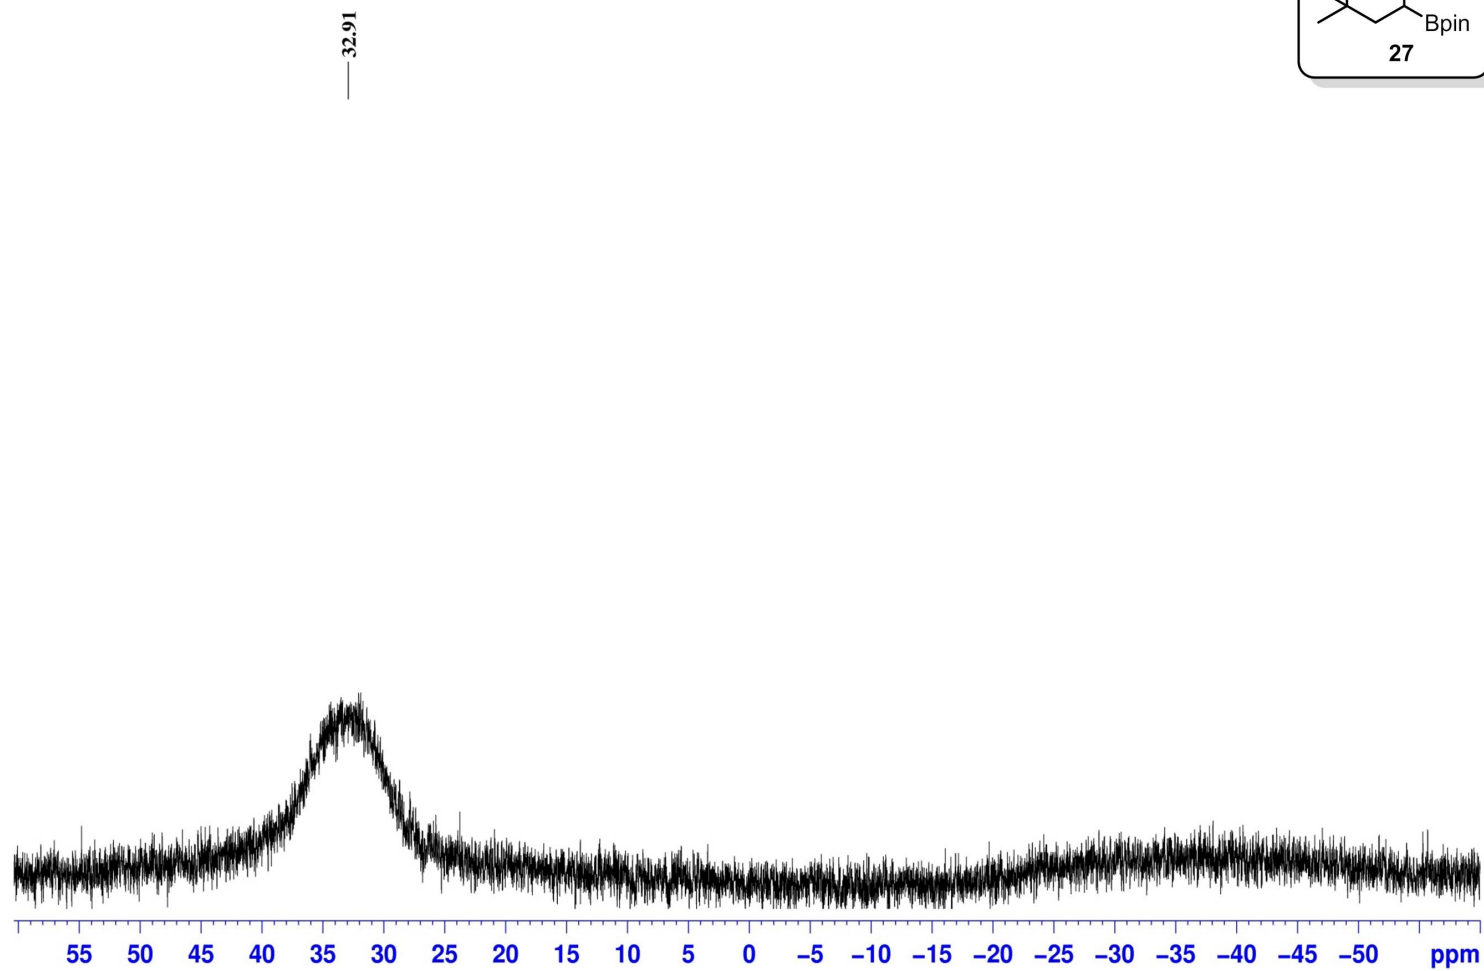

S230

# <sup>1</sup>H NMR

2-(3-(3,3-dimethyl-1-(4,4,5,5-tetramethyl-1,3,2-dioxaborolan-2-yl)butyl)phenyl)isoindoline-1,3-dione  
500 MHz, CDCl<sub>3</sub>

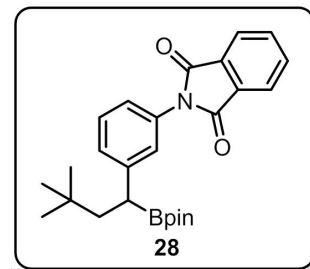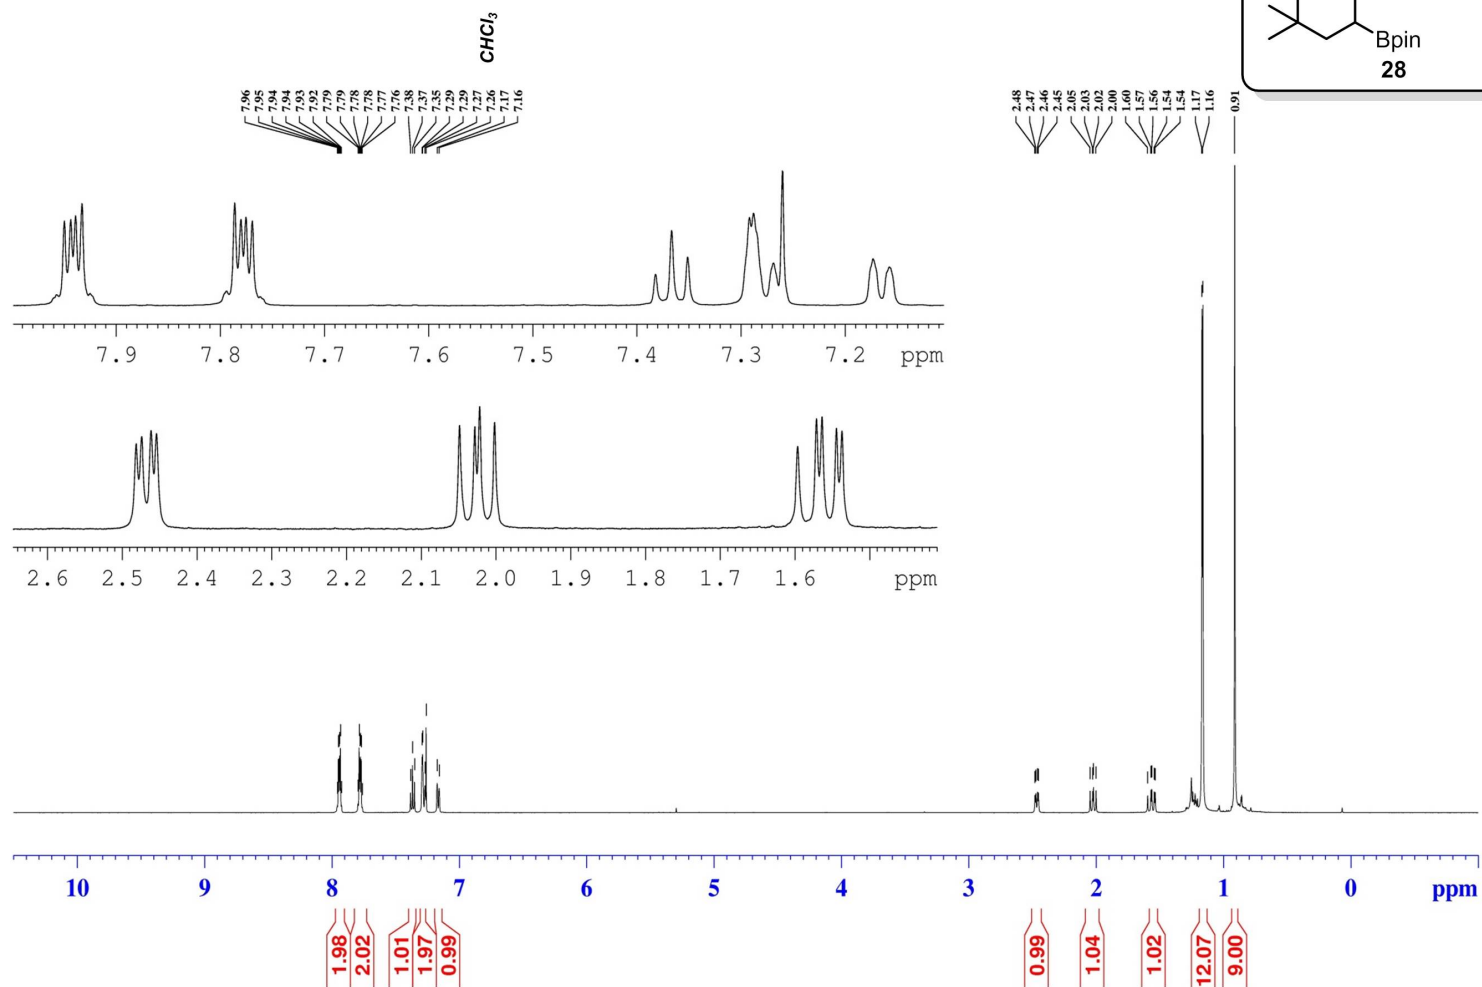

**<sup>13</sup>C NMR**

2-(3-(3,3-Dimethyl-1-(4,4,5,5-tetramethyl-1,3,2-dioxaborolan-2-yl)butyl)phenyl)isoindoline-1,3-dione  
125 MHz, CDCl<sub>3</sub>

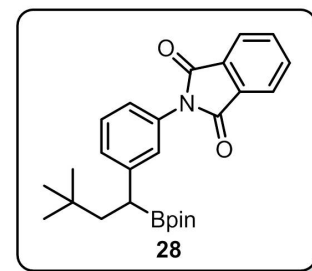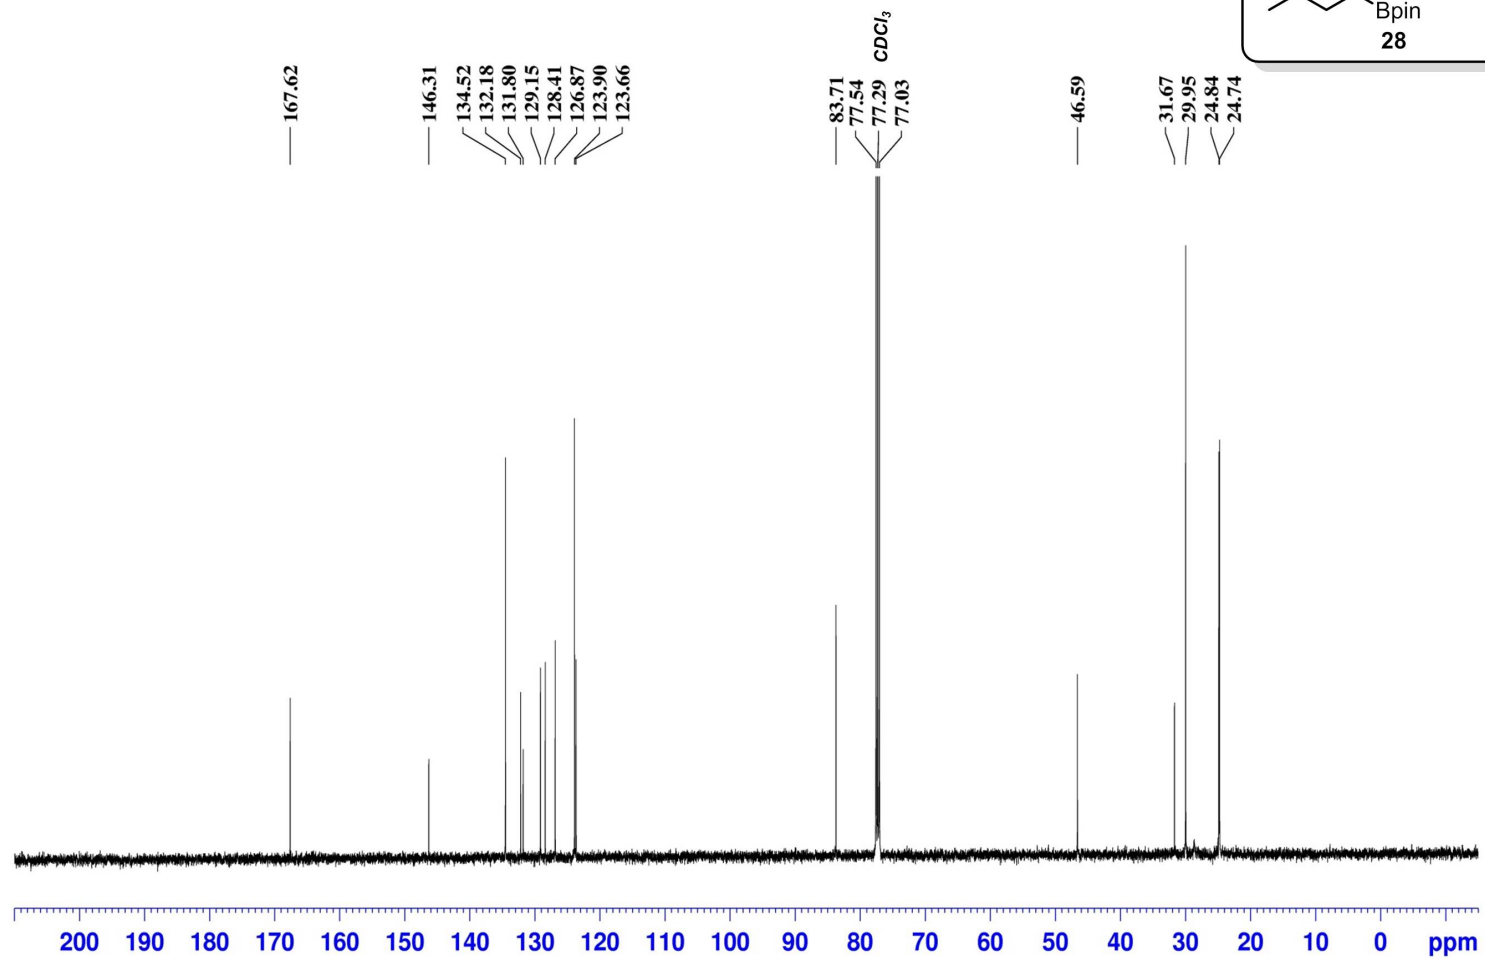



**<sup>11</sup>B NMR**

2-(3-(3,3-dimethyl-1-(4,4,5,5-tetramethyl-1,3,2-dioxaborolan-2-yl)butyl)phenyl)isoindoline-1,3-dione  
128 MHz, CDCl<sub>3</sub>

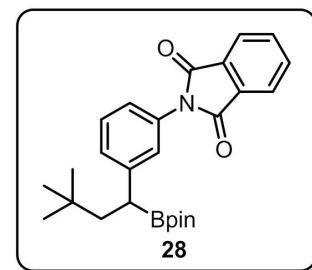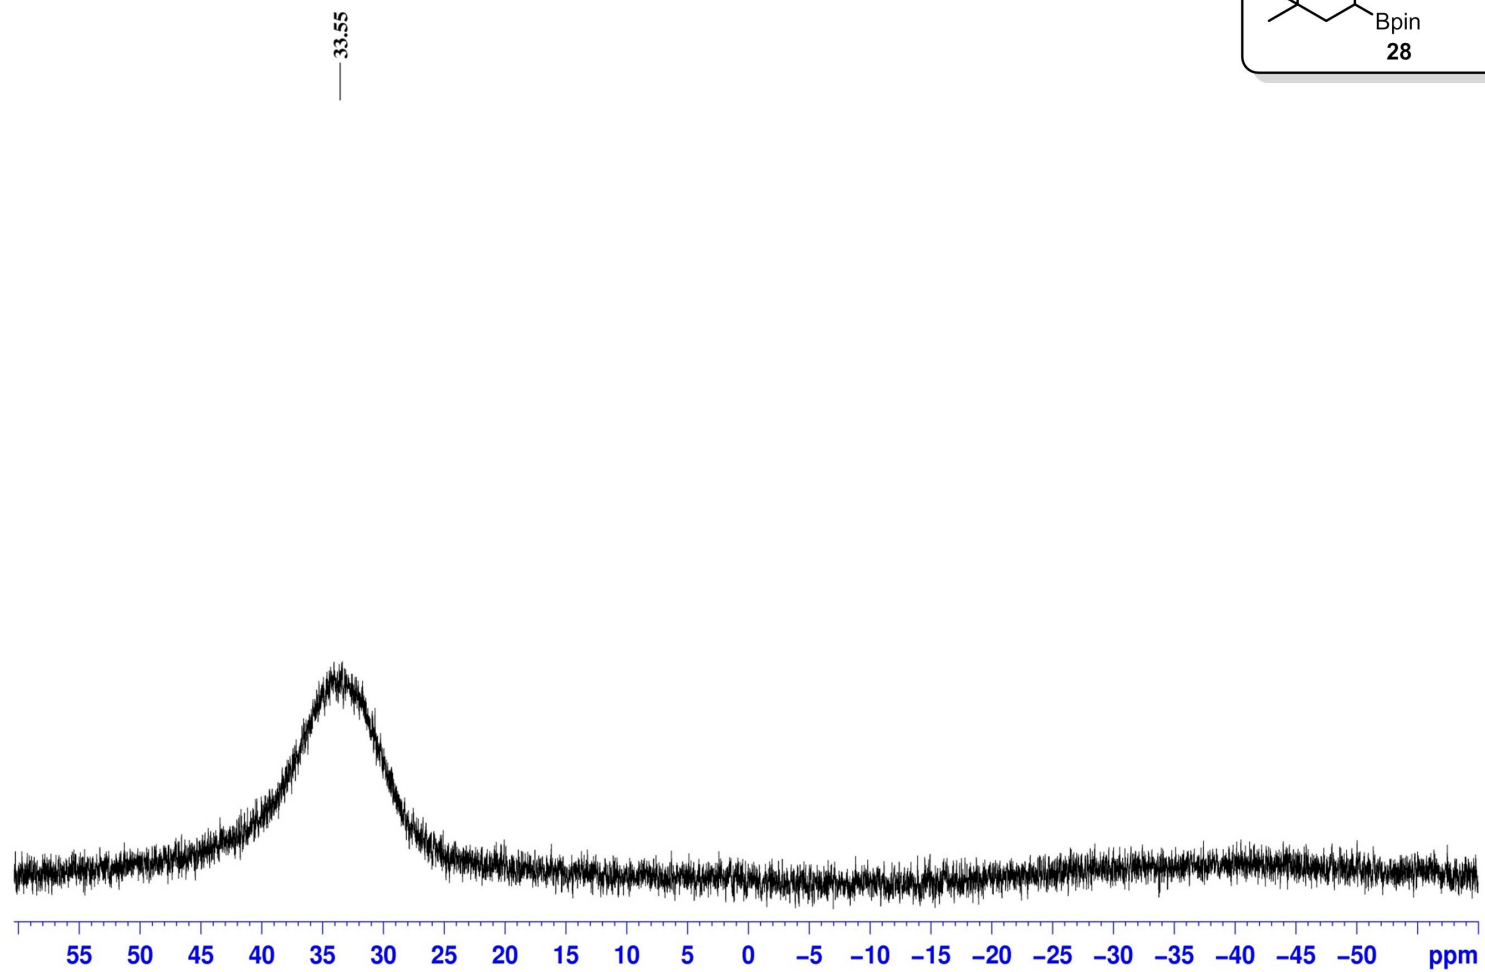

# <sup>1</sup>H NMR

2-(3,3-dimethyl-1-(4'-(trifluoromethyl)-[1,1'-biphenyl]-4-yl)butyl)-4,4,5,5-tetramethyl-1,3,2-dioxaborolane  
500 MHz, CDCl<sub>3</sub>

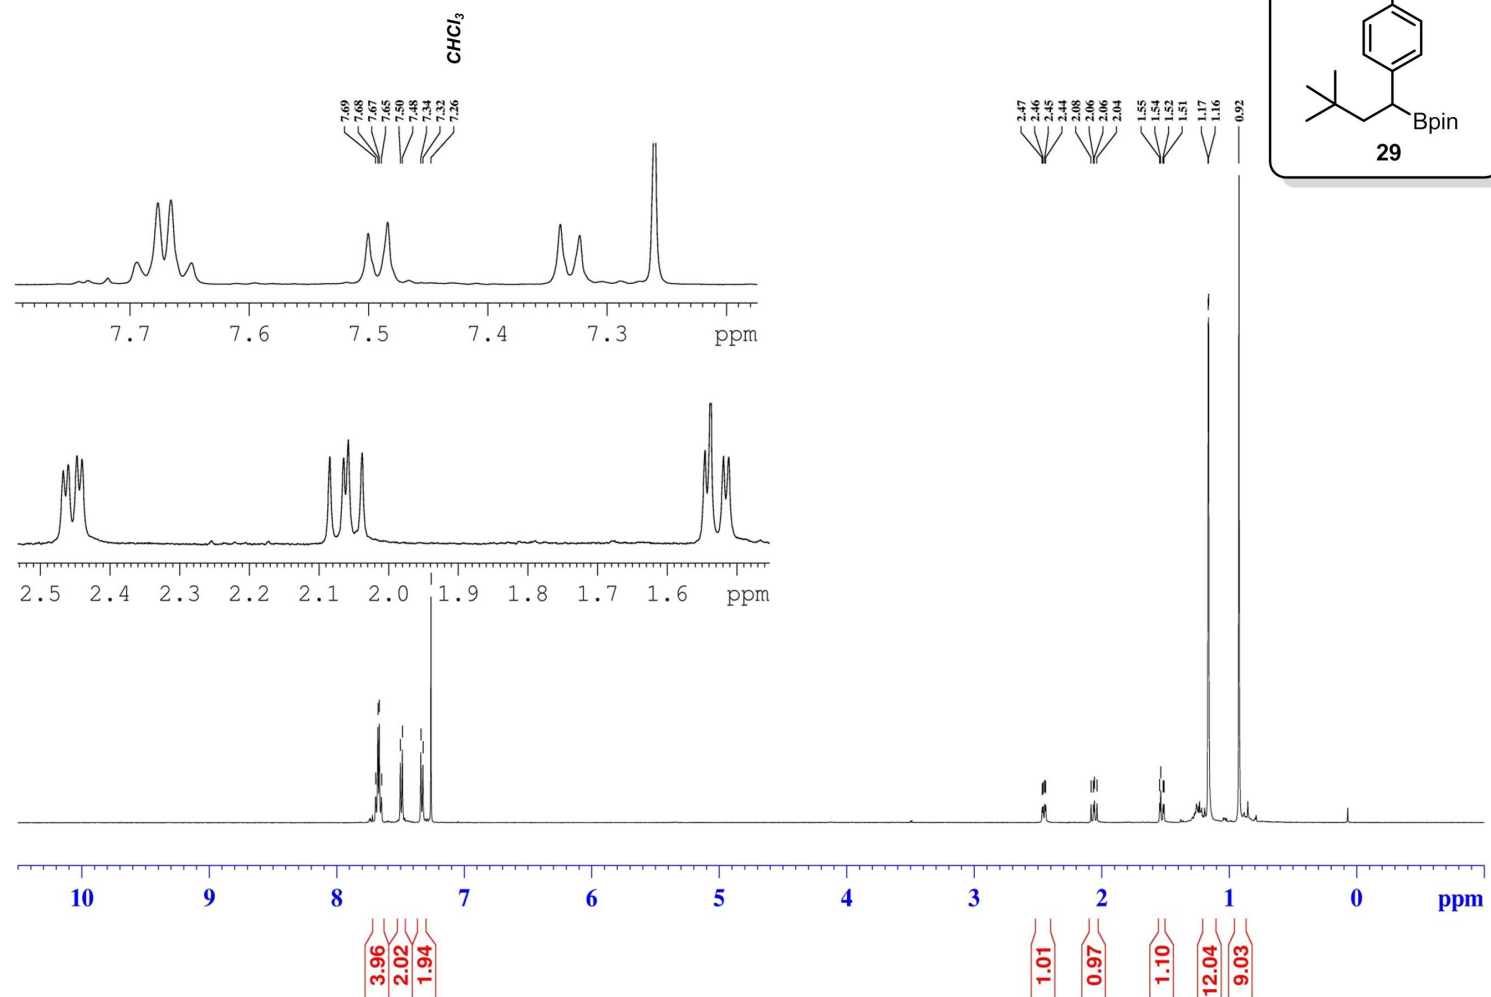

# <sup>13</sup>C NMR

2-(3,3-Dimethyl-1-(4'-(trifluoromethyl)-[1,1'-biphenyl]-4-yl)butyl)-4,4,5,5-tetramethyl-1,3,2-dioxaborolane  
125 MHz, CDCl<sub>3</sub>

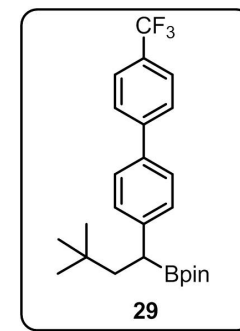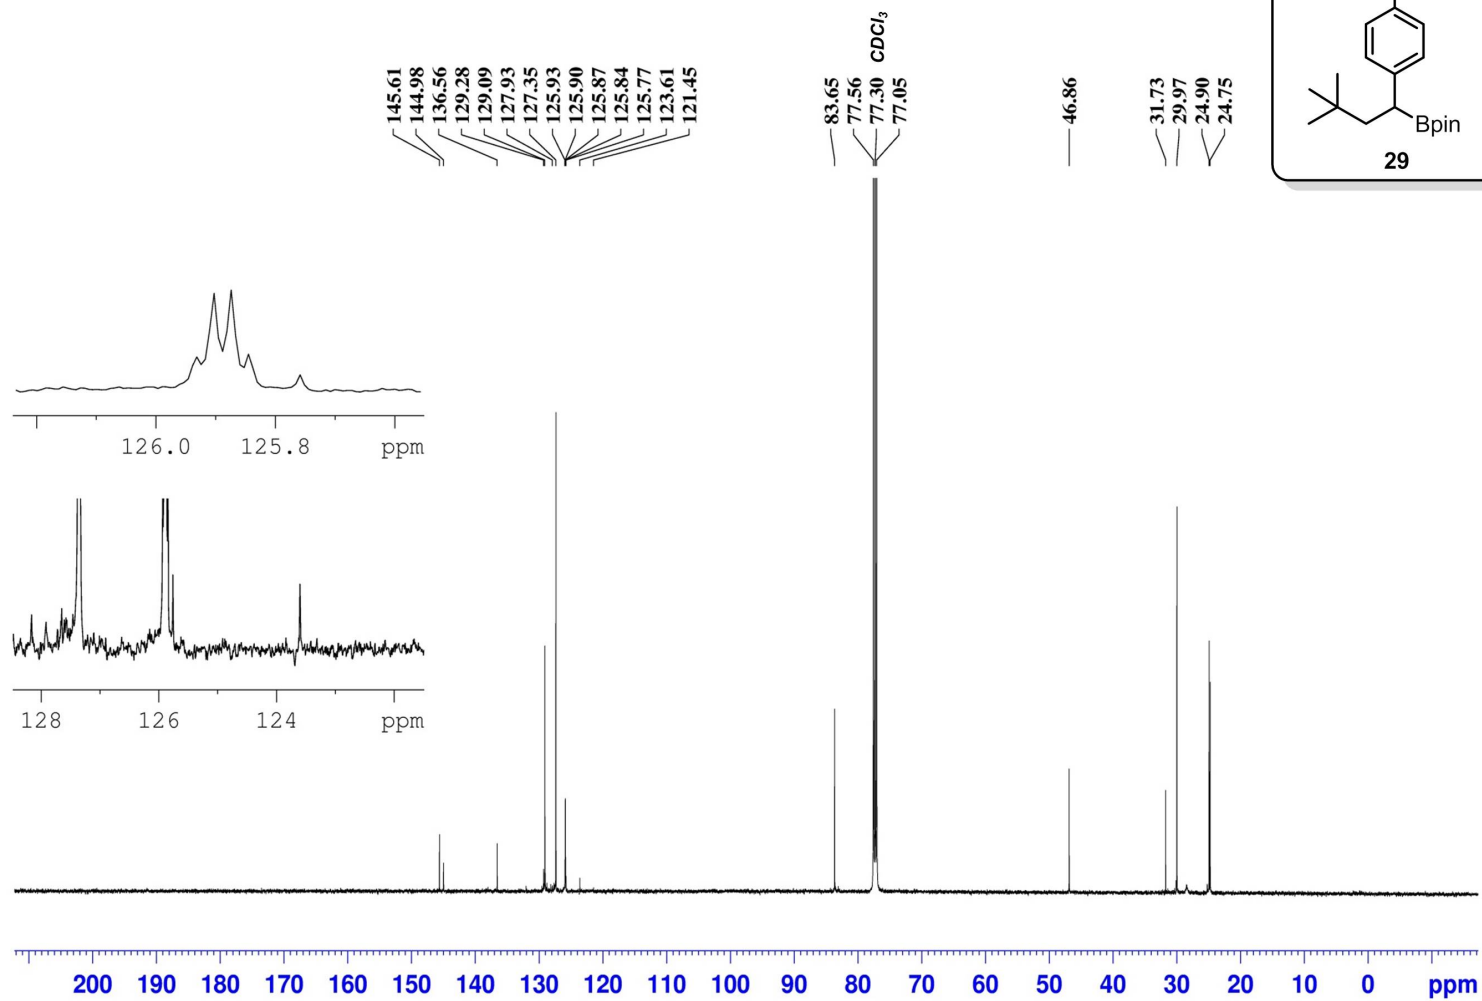

**<sup>19</sup>F NMR**

2-(3,3-dimethyl-1-(4'-(trifluoromethyl)-[1,1'-biphenyl]-4-yl)butyl)-4,4,5,5-tetramethyl-1,3,2-dioxaborolane  
471 MHz, CDCl<sub>3</sub>

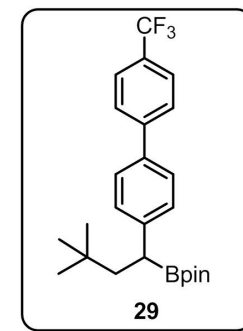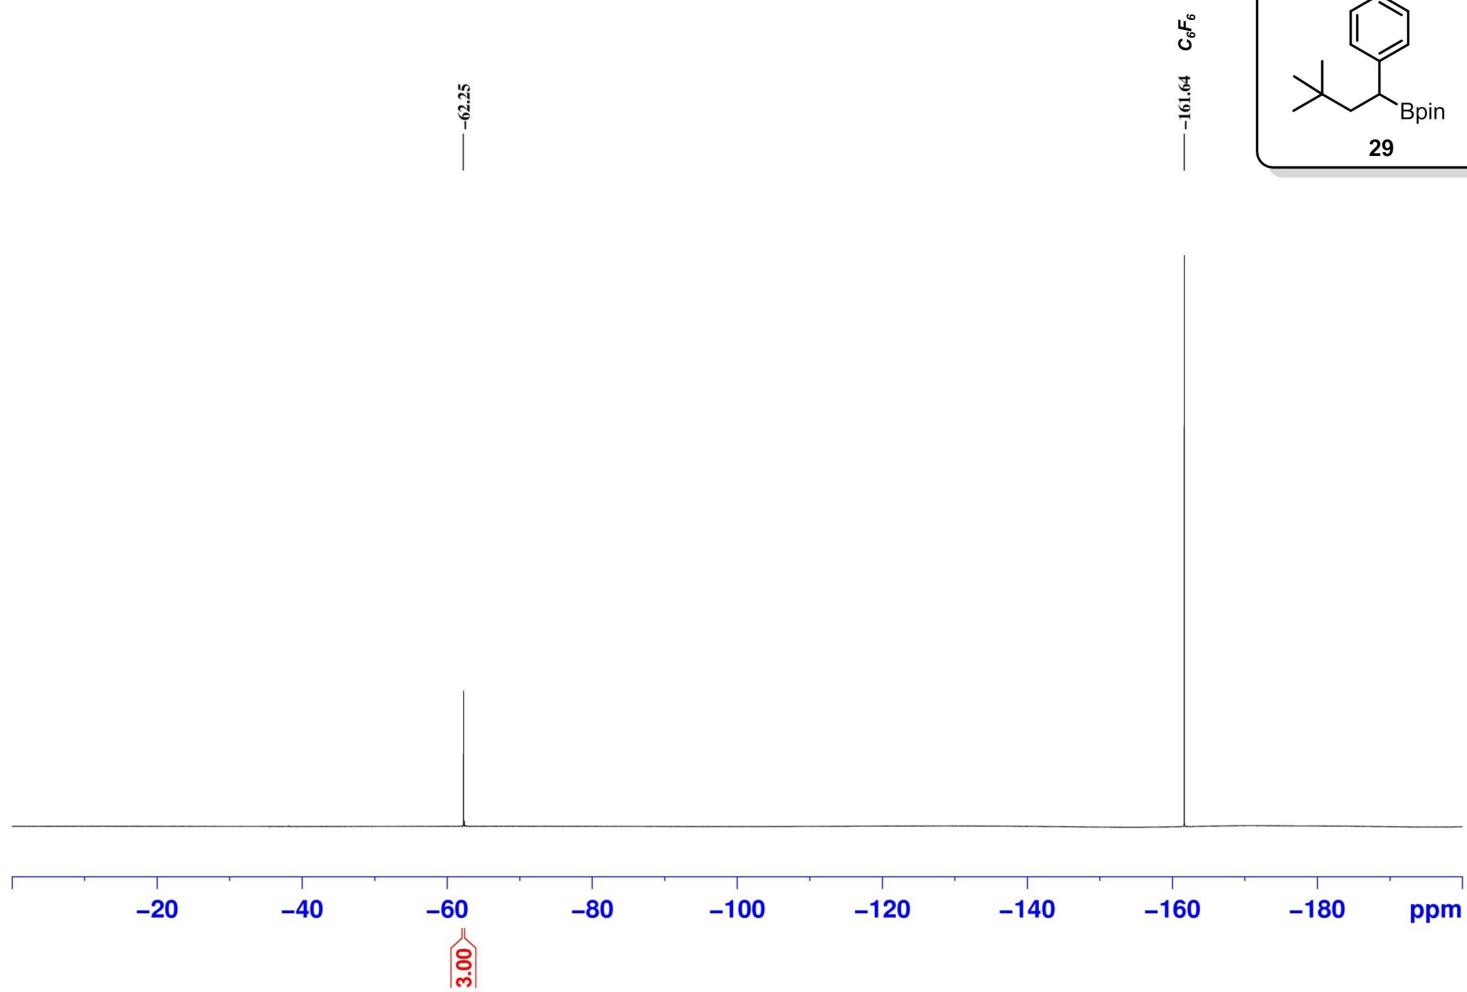

**<sup>11</sup>B NMR**

2-(3,3-dimethyl-1-(4'-(trifluoromethyl)-[1,1'-biphenyl]-4-yl)butyl)-4,4,5,5-tetramethyl-1,3,2-dioxaborolane  
128 MHz, CDCl<sub>3</sub>

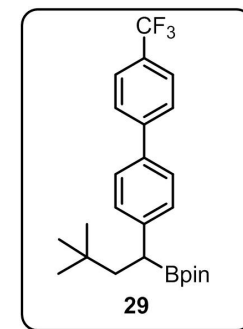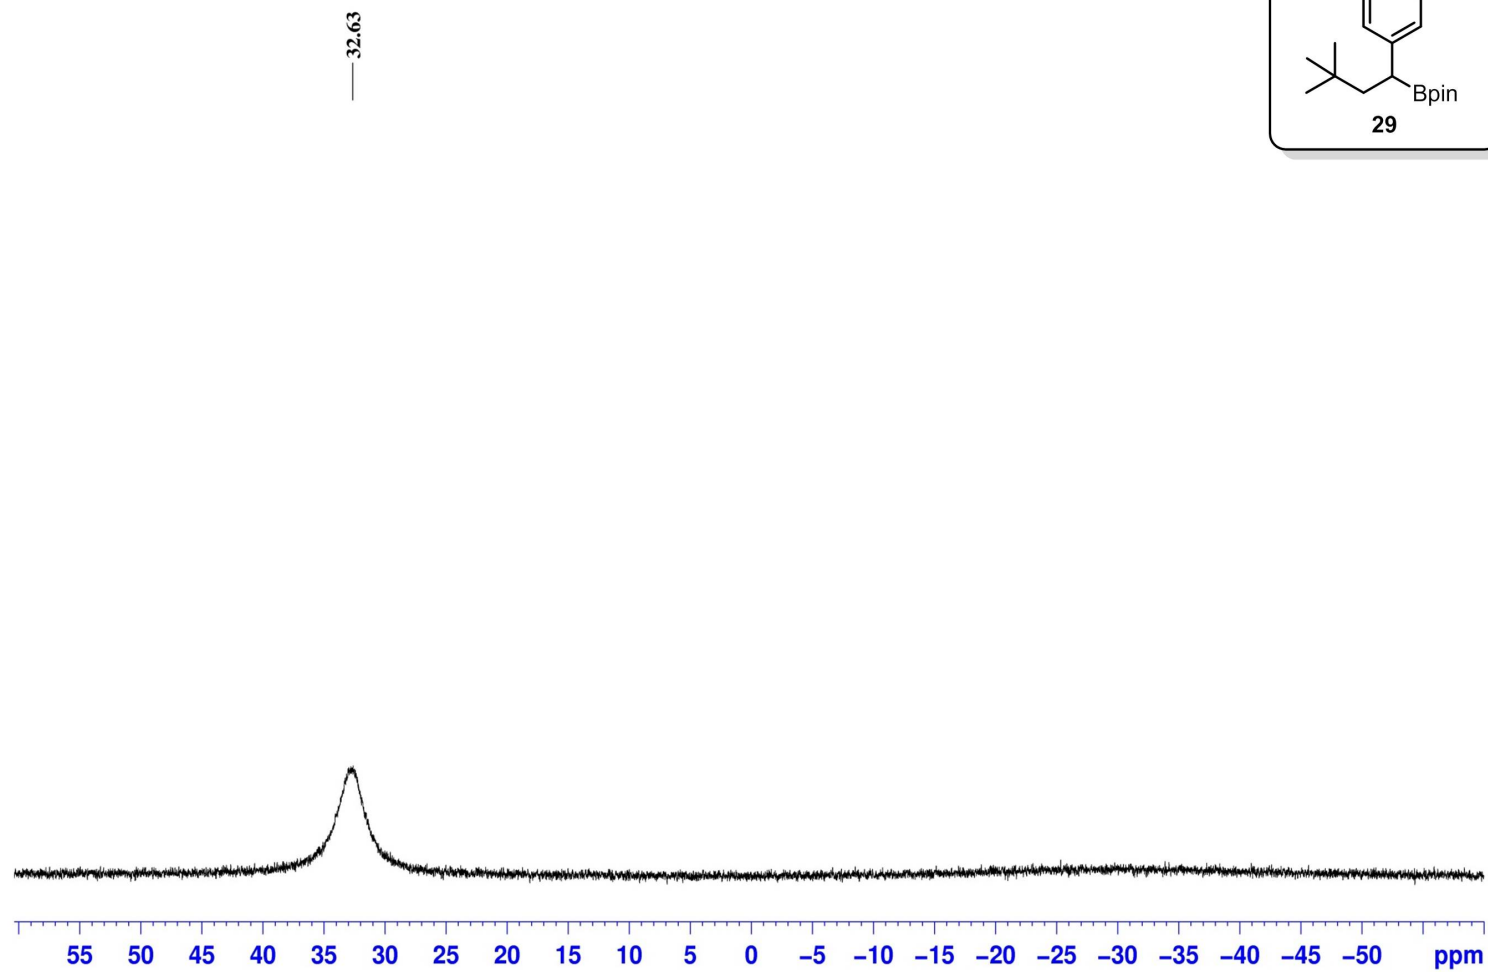

# <sup>1</sup>H NMR

7-(3,3-dimethyl-1-(4,4,5,5-tetramethyl-1,3,2-dioxaborolan-2-yl)butyl)-1-methyl-5-phenyl-1H-benzo[e][1,4]diazepin-2(3H)-one  
500 MHz, CDCl<sub>3</sub>

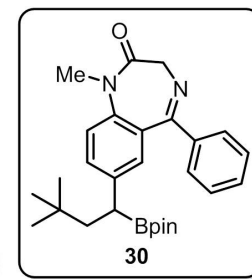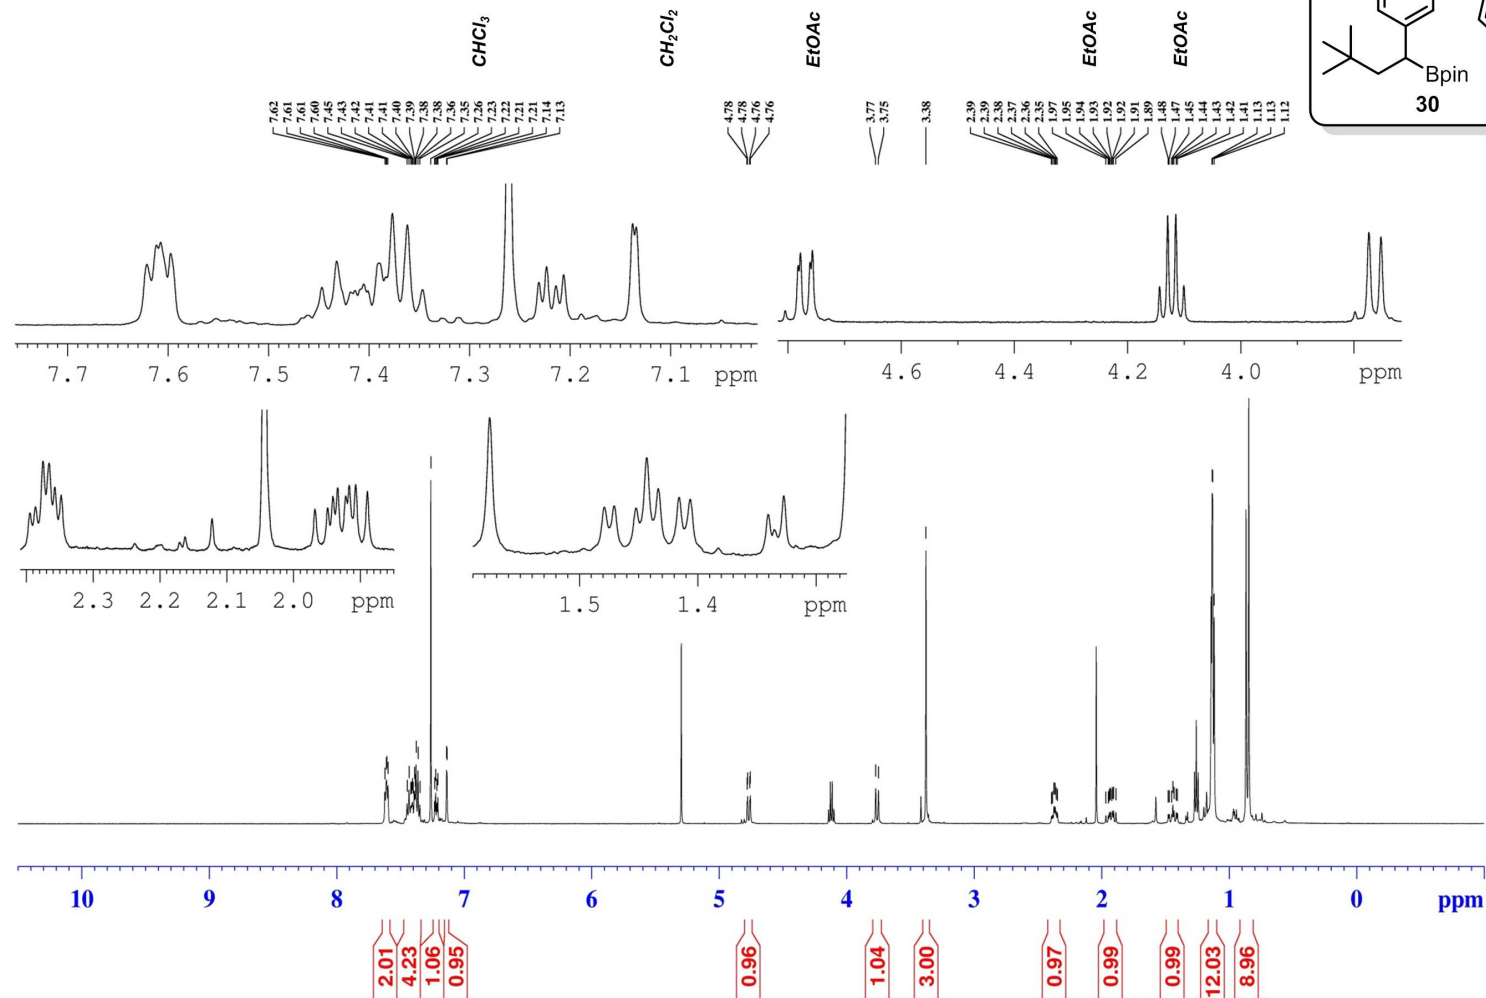

**<sup>13</sup>C NMR**

7-(3,3-Dimethyl-1-(4,4,5,5-tetramethyl-1,3,2-dioxaborolan-2-yl)butyl)-1-methyl-5-phenyl-1H-benzo[e][1,4]diazepin-2(3H)-one  
125 MHz, CDCl<sub>3</sub>

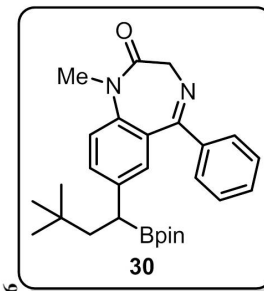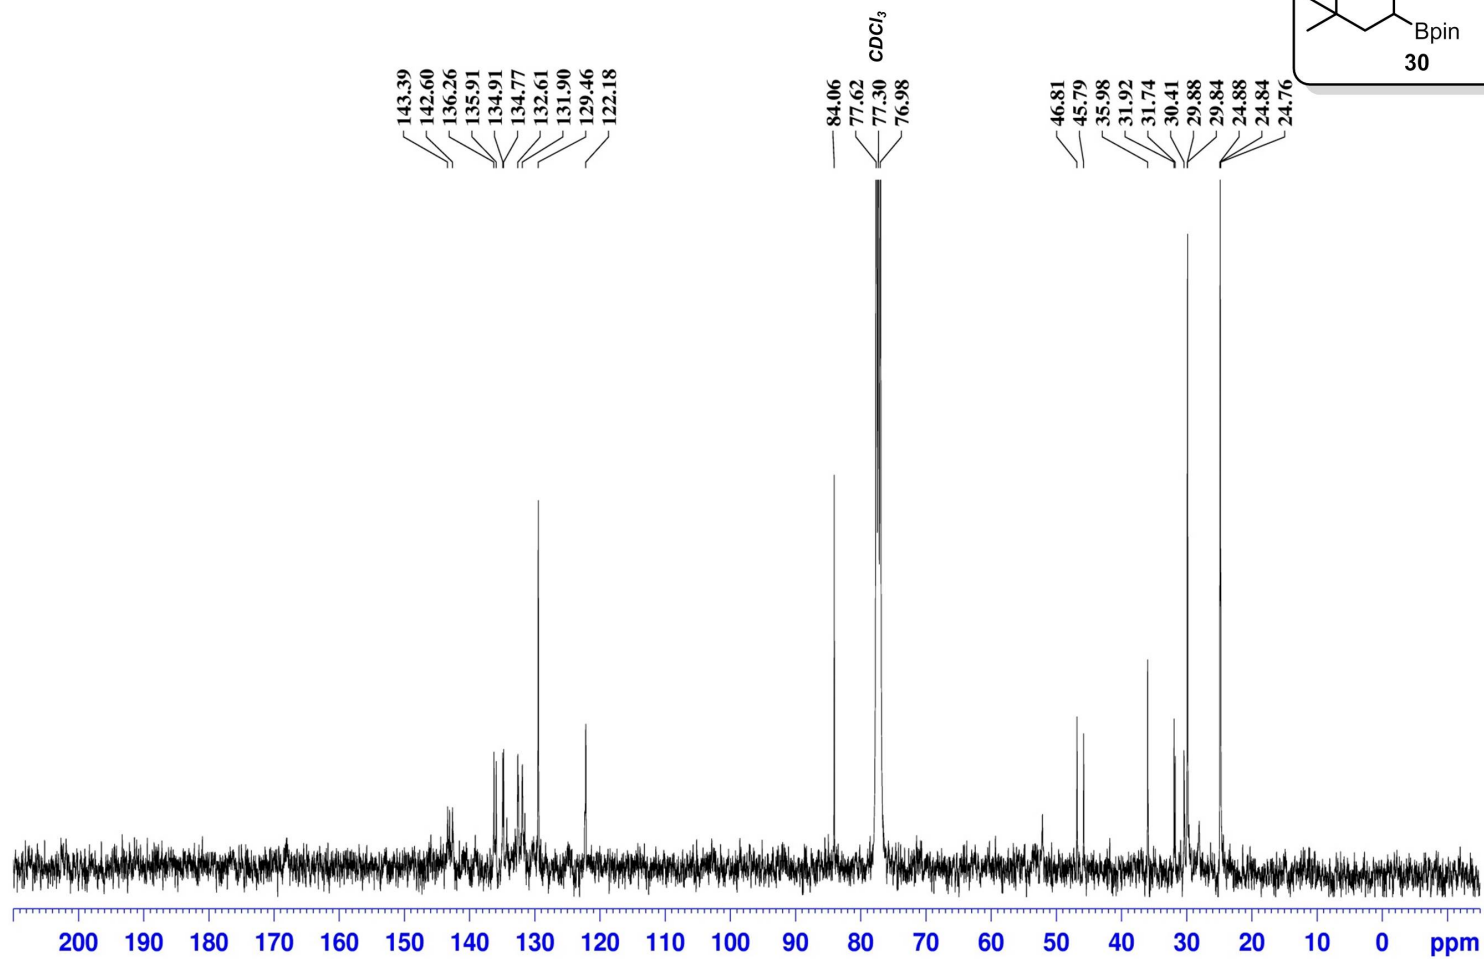

**<sup>11</sup>B NMR**

7-(3,3-dimethyl-1-(4,4,5,5-tetramethyl-1,3,2-dioxaborolan-2-yl)butyl)-1-methyl-5-phenyl-1H-benzo[e][1,4]diazepin-2(3H)-one  
128 MHz, CDCl<sub>3</sub>

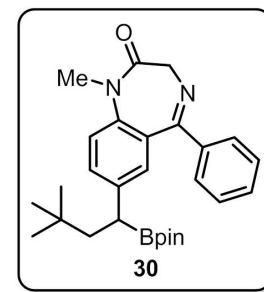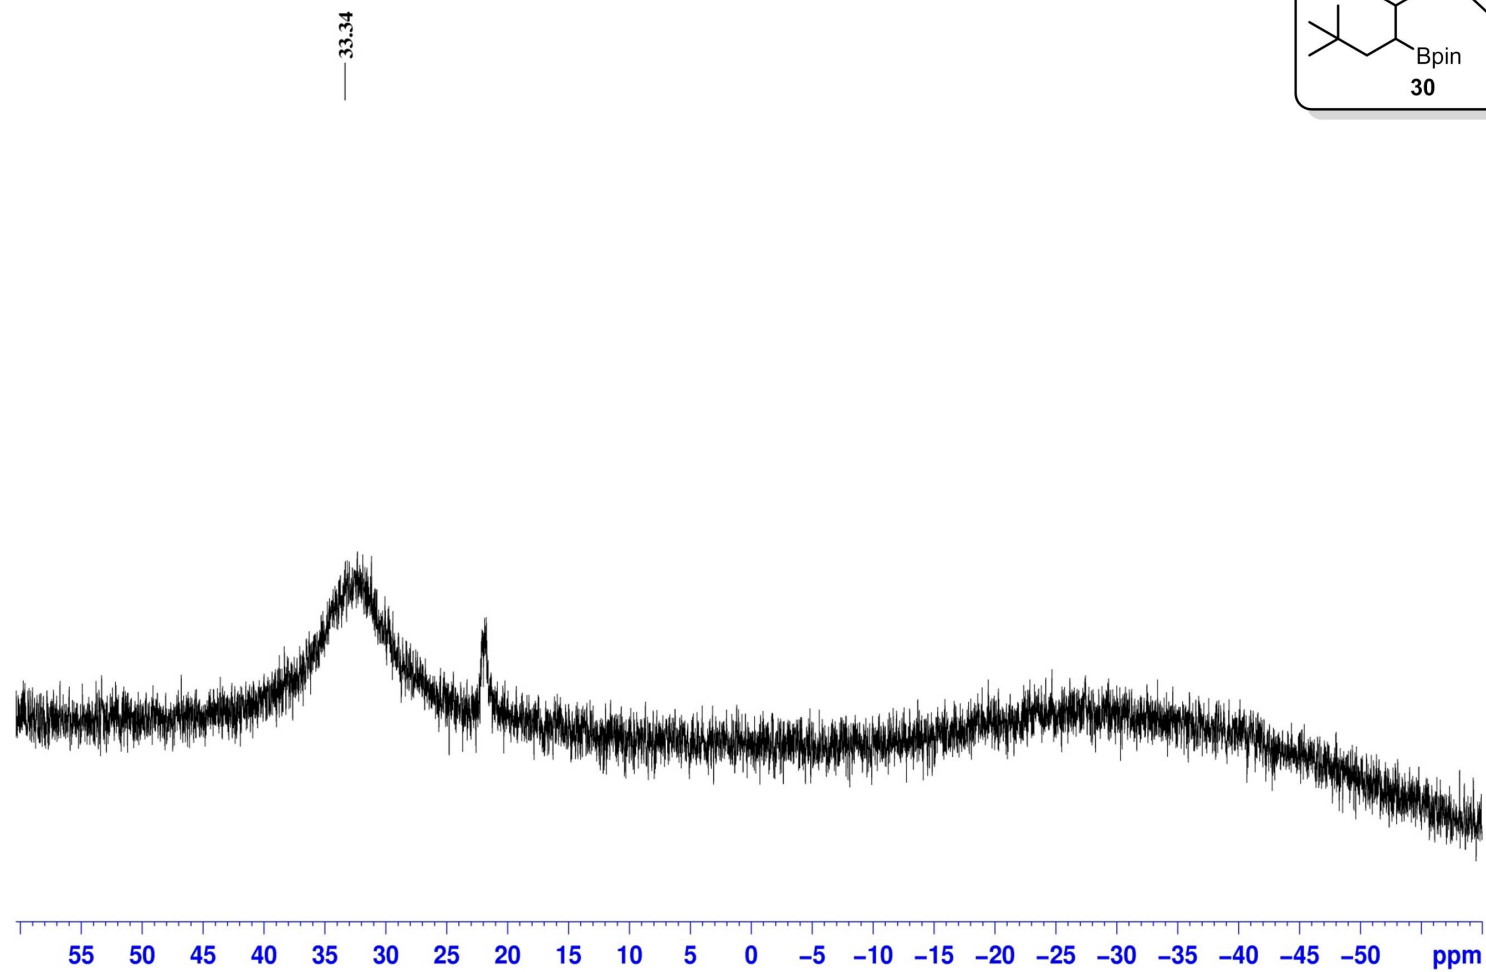



# <sup>1</sup>H NMR

ethyl 8-(3,3-dimethyl-1-(4,4,5,5-tetramethyl-1,3,2-dioxaborolan-2-yl)butyl)-5-methyl-6-oxo-5,6-dihydro-4H-benzo[f]imidazo[1,5-a][1,4]diazepine-3-carboxylate  
500 MHz, CDCl<sub>3</sub>

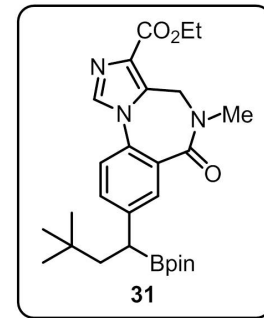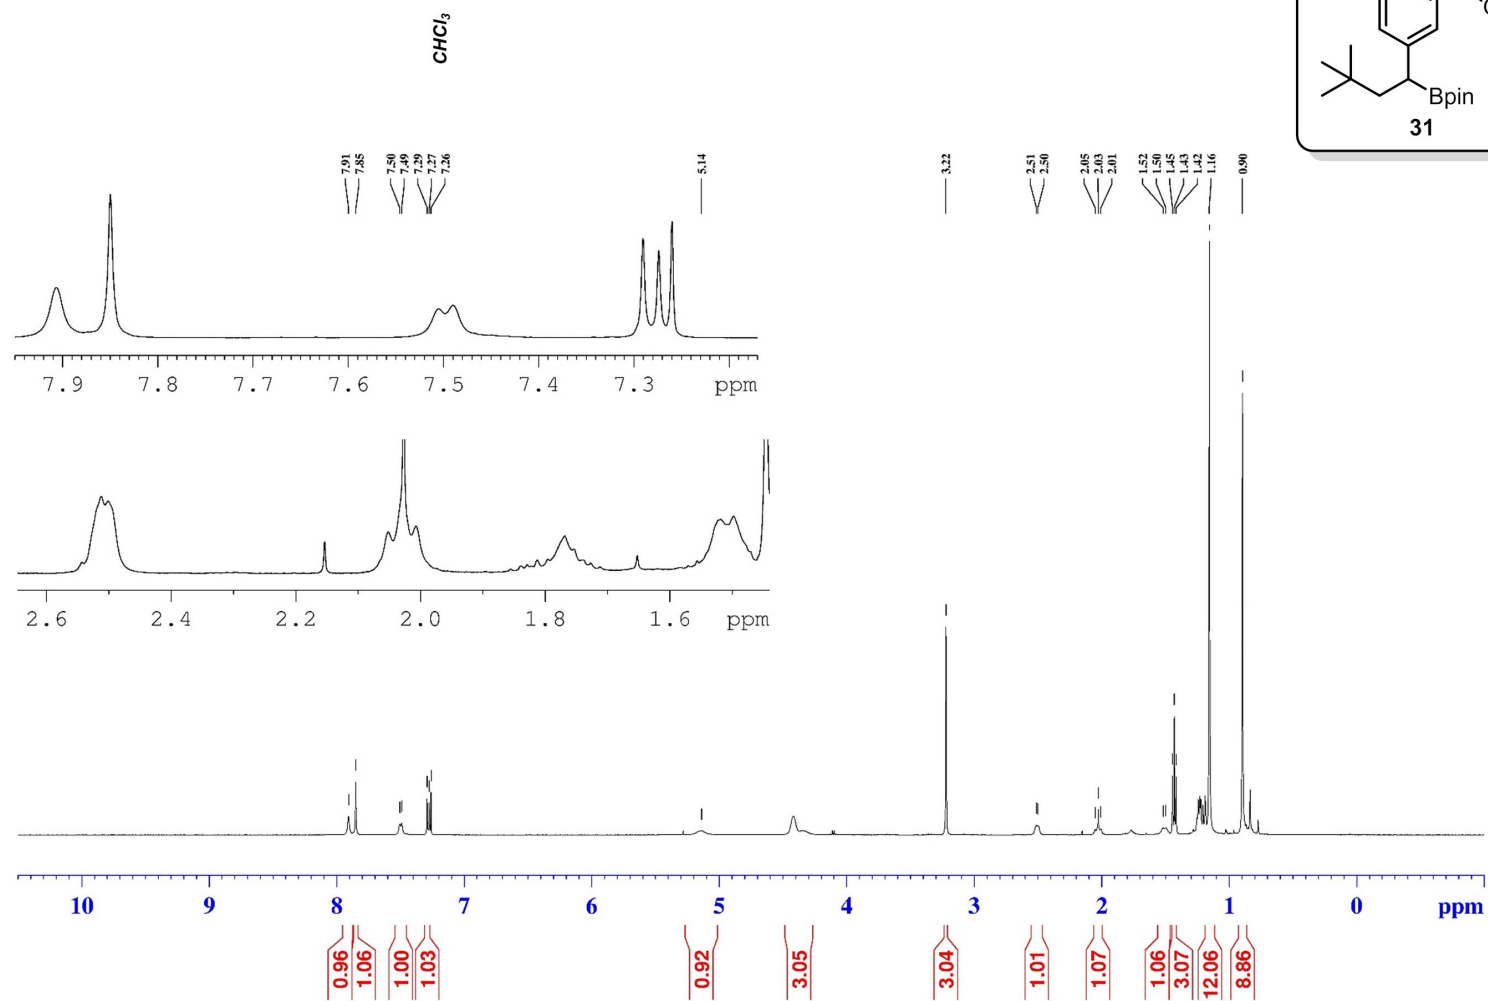

S241

# <sup>13</sup>C NMR

Ethyl 8-(3,3-dimethyl-1-(4,4,5,5-tetramethyl-1,3,2-dioxaborolan-2-yl)butyl)-5-methyl-6-oxo-5,6-dihydro-4H-benzo[f]imidazo[1,5-a][1,4]diazepine-3-carboxylate  
125 MHz, CDCl<sub>3</sub>

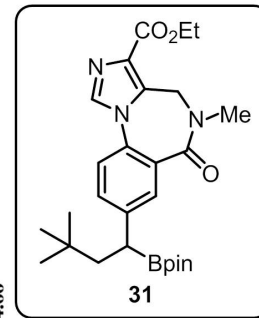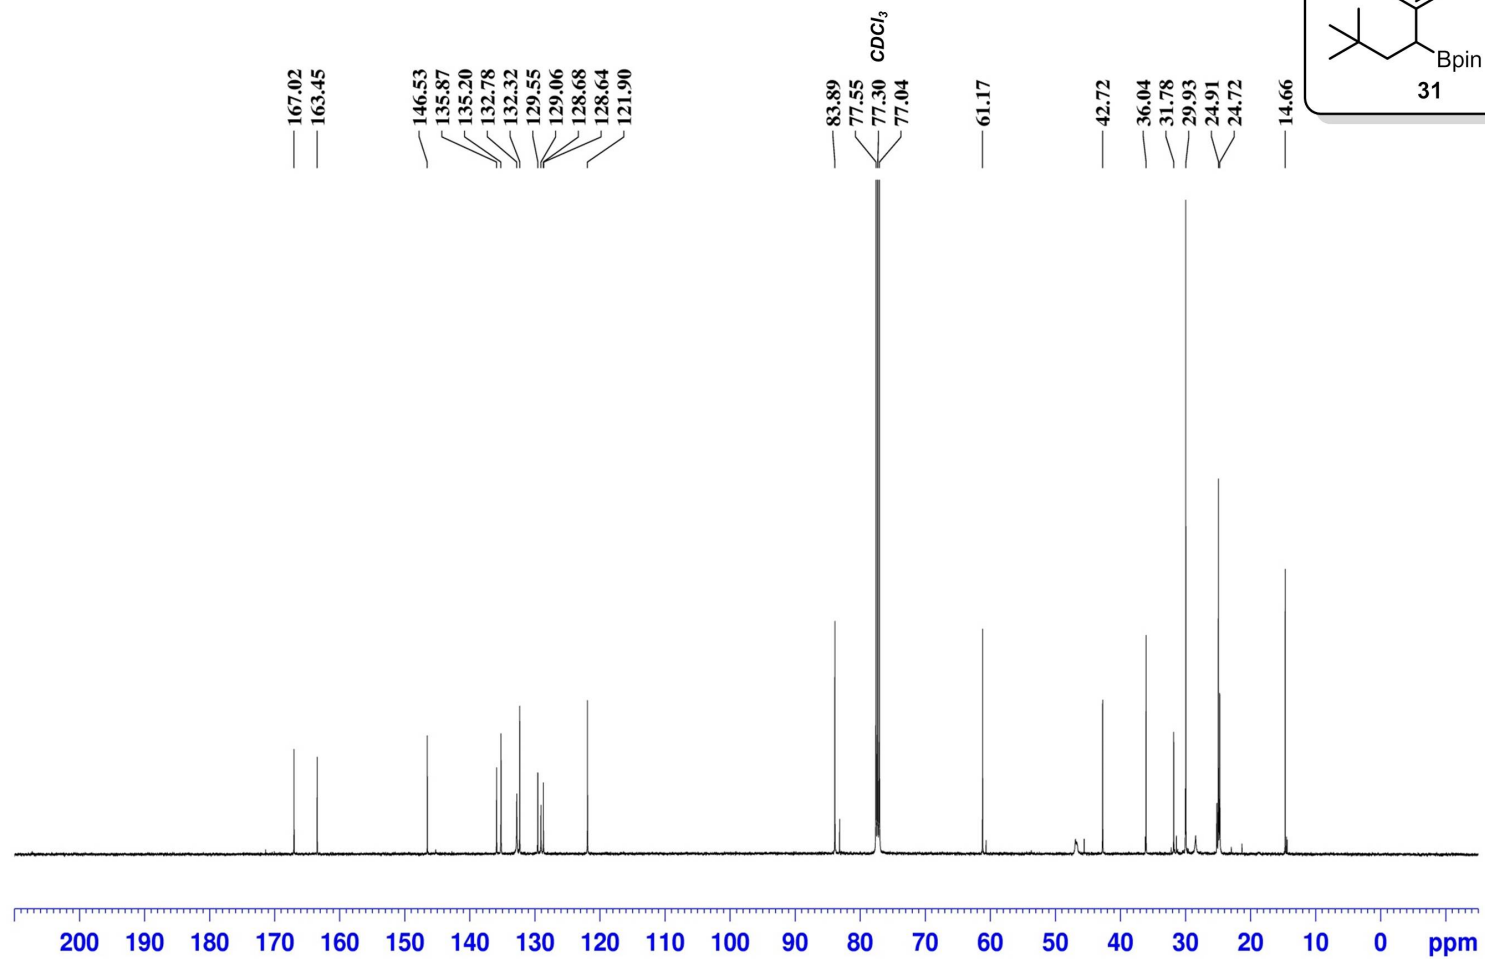

### <sup>11</sup>B NMR

ethyl 8-(3,3-dimethyl-1-(4,4,5,5-tetramethyl-1,3,2-dioxaborolan-2-yl)butyl)-5-methyl-6-oxo-5,6-dihydro-4H-benzo[f]imidazo[1,5-a][1,4]diazepine-3-carboxylate  
128 MHz, CDCl<sub>3</sub>

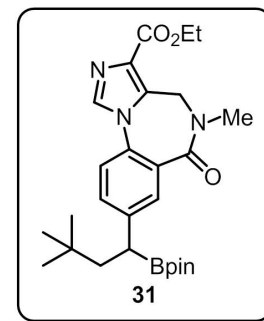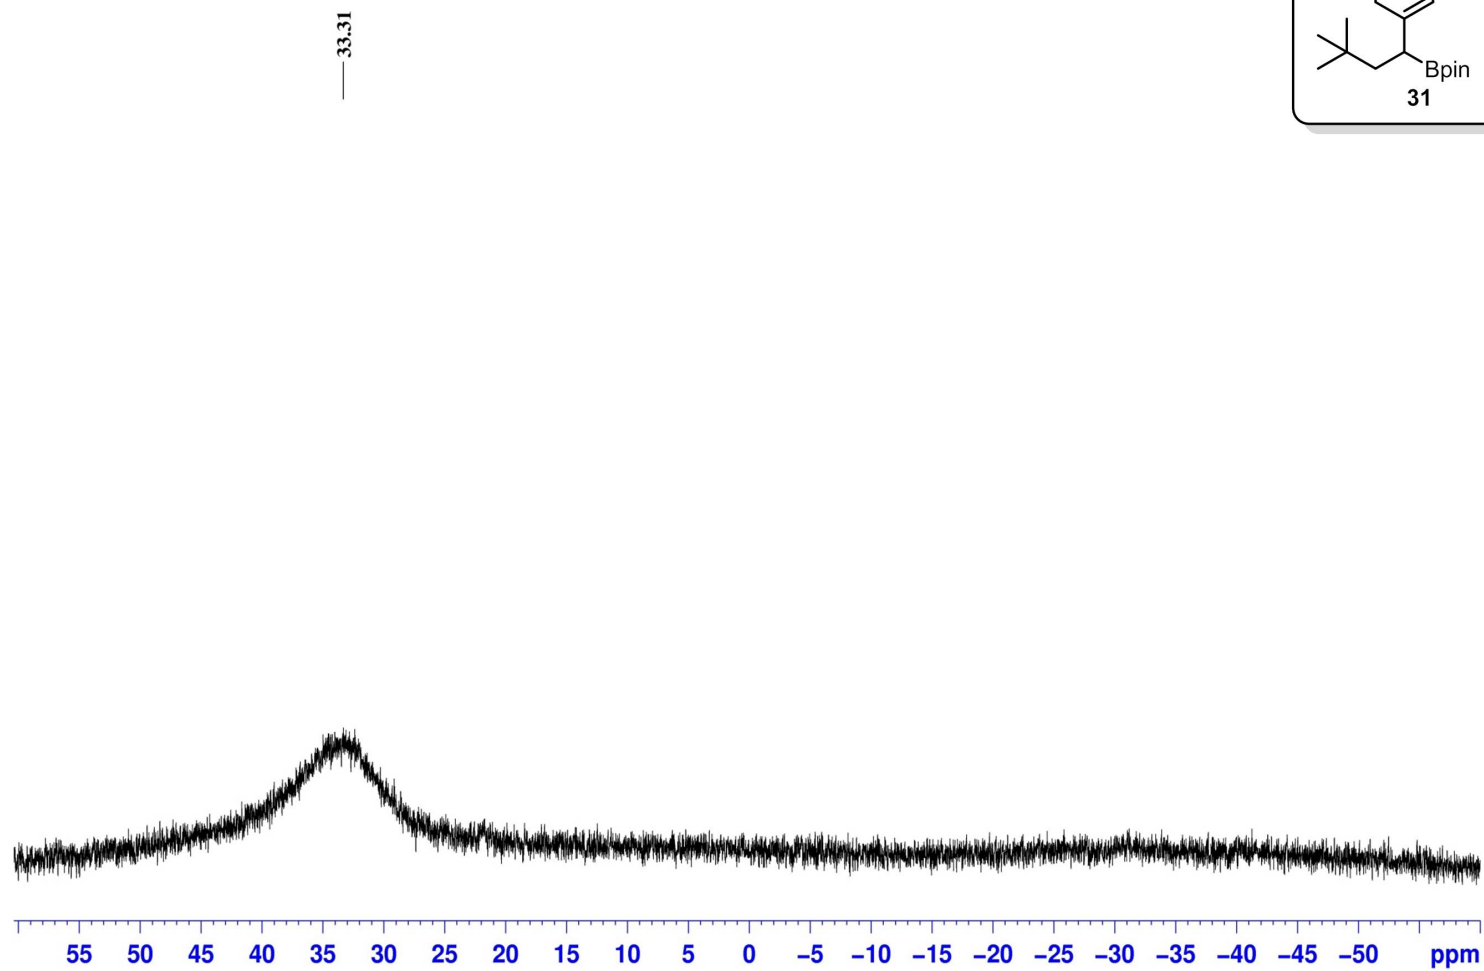

S243

# <sup>1</sup>H NMR

2-chloro-5-(3,3-dimethyl-1-(4,4,5,5-tetramethyl-1,3,2-dioxaborolan-2-yl)butyl)nicotinitrile  
500 MHz, CDCl<sub>3</sub>

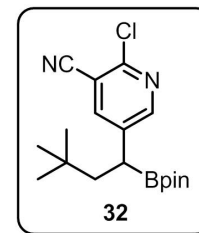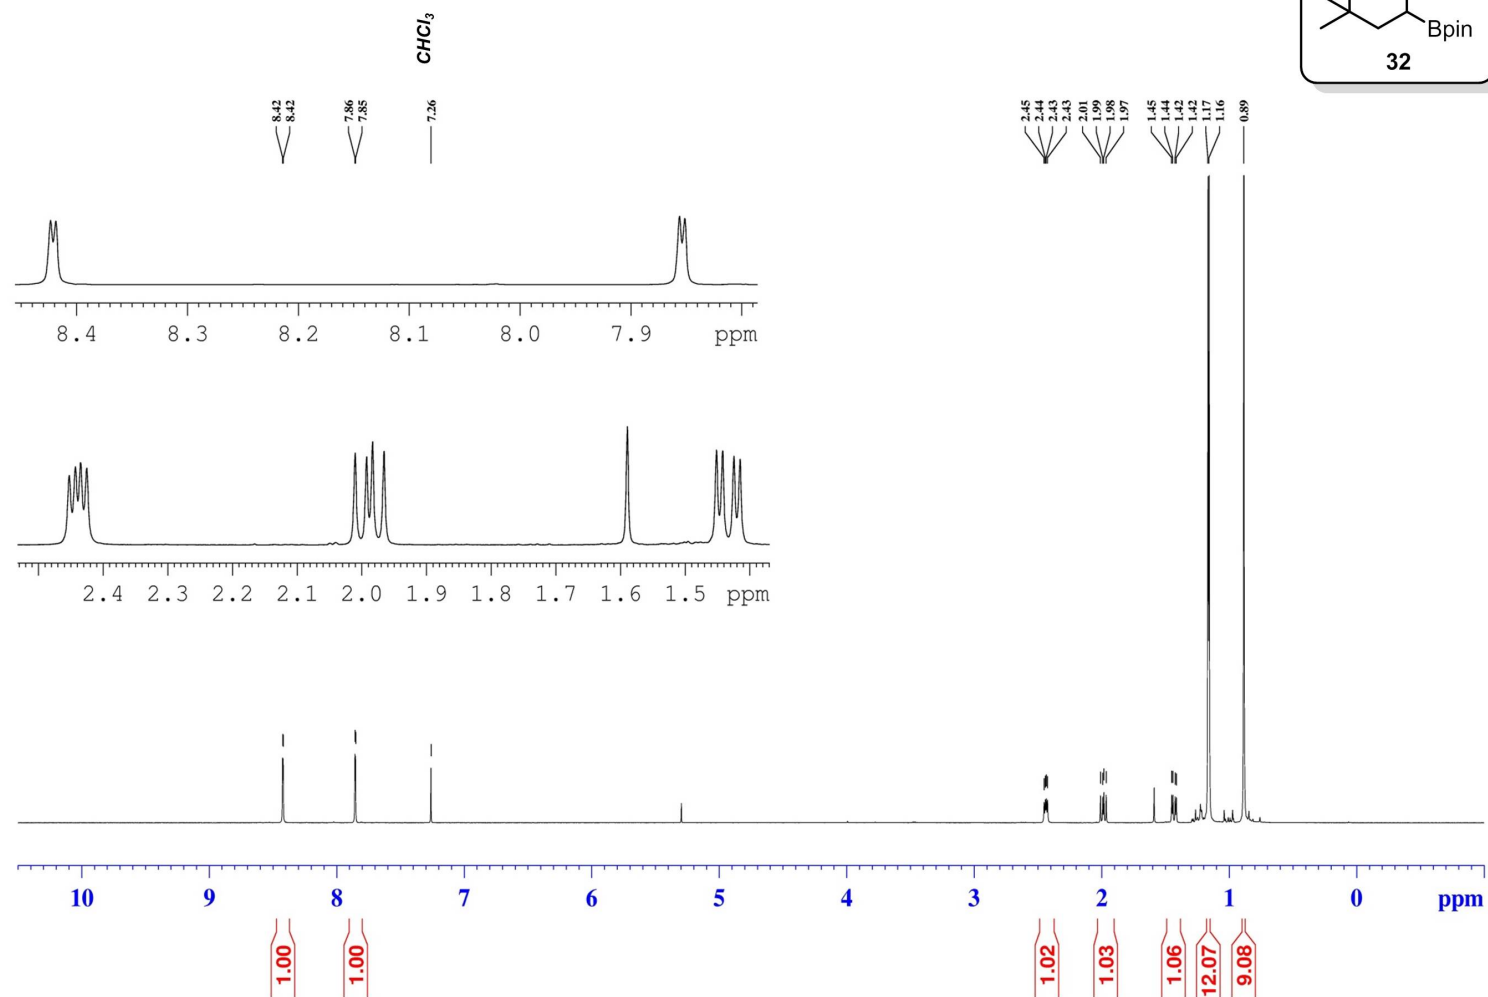

**<sup>13</sup>C NMR**

2-Chloro-5-(3,3-dimethyl-1-(4,4,5,5-tetramethyl-1,3,2-dioxaborolan-2-yl)butyl)nicotinonitrile  
125 MHz, CDCl<sub>3</sub>

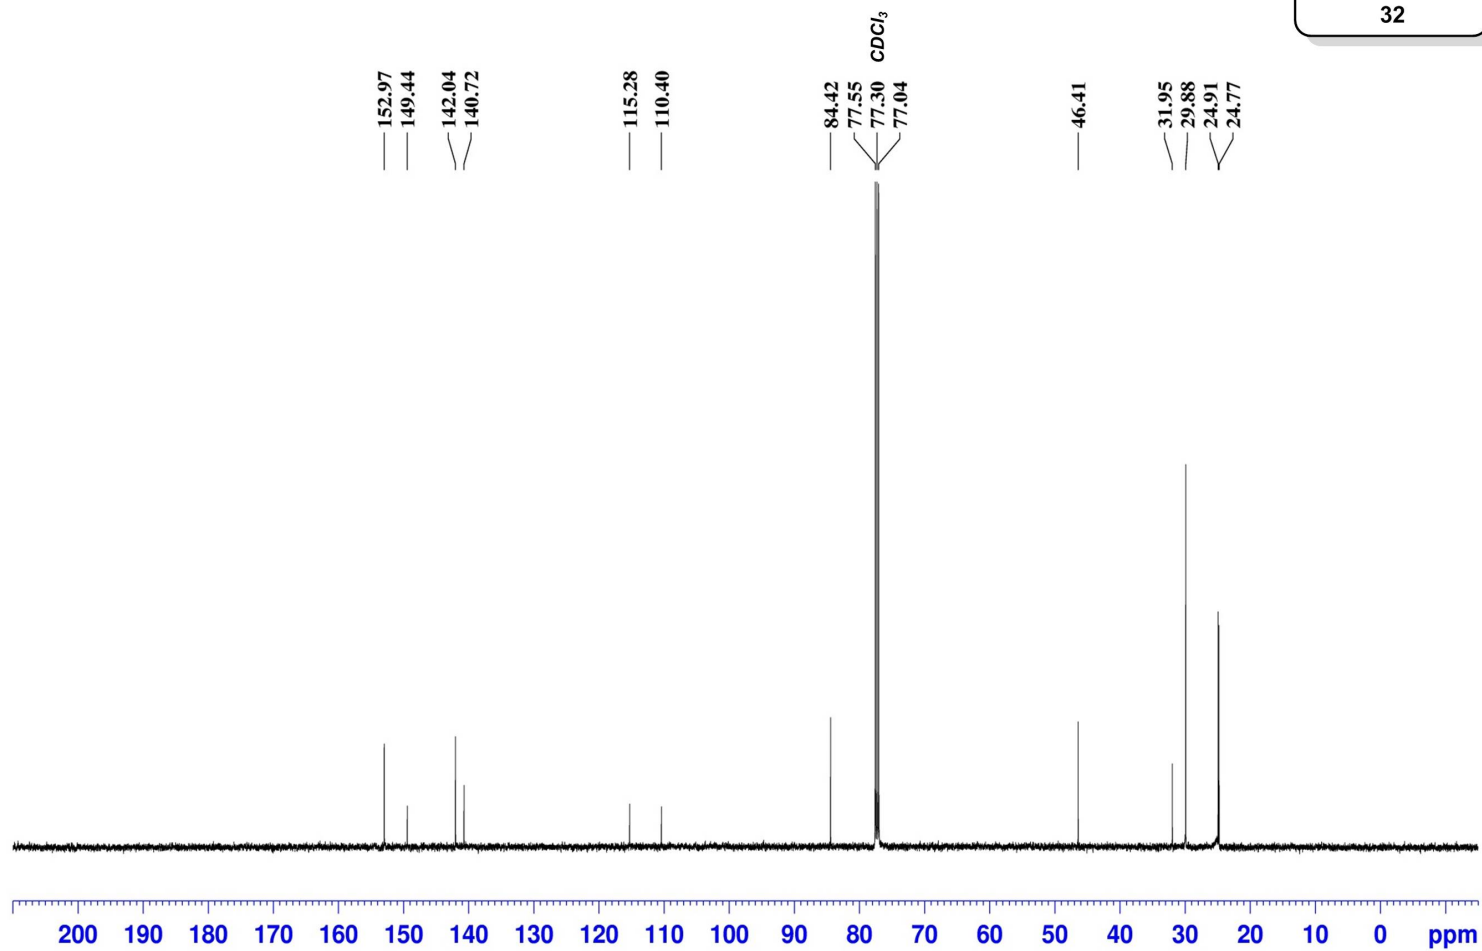

**<sup>11</sup>B NMR**

2-chloro-5-(3,3-dimethyl-1-(4,4,5,5-tetramethyl-1,3,2-dioxaborolan-2-yl)butyl)nicotinonitrile  
128 MHz, CDCl<sub>3</sub>

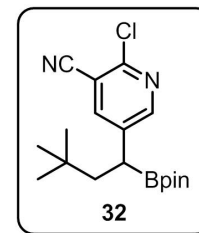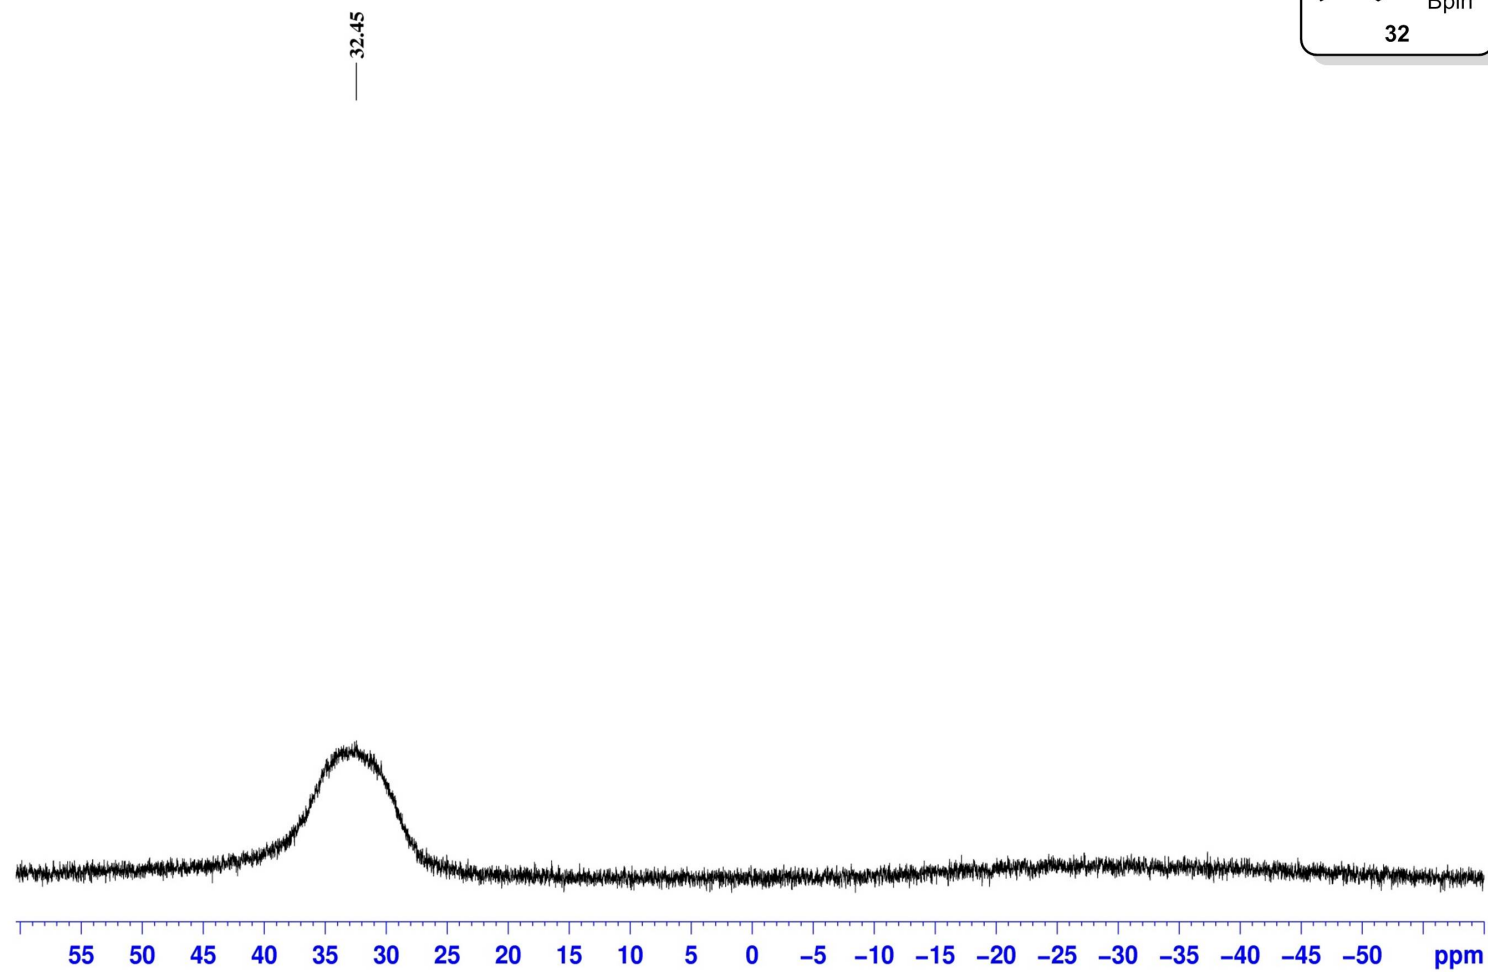

methyl 5-(3,3-dimethylbutyl)picolinate  
500 MHz, CDCl<sub>3</sub>

<sup>1</sup>H NMR

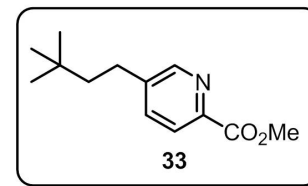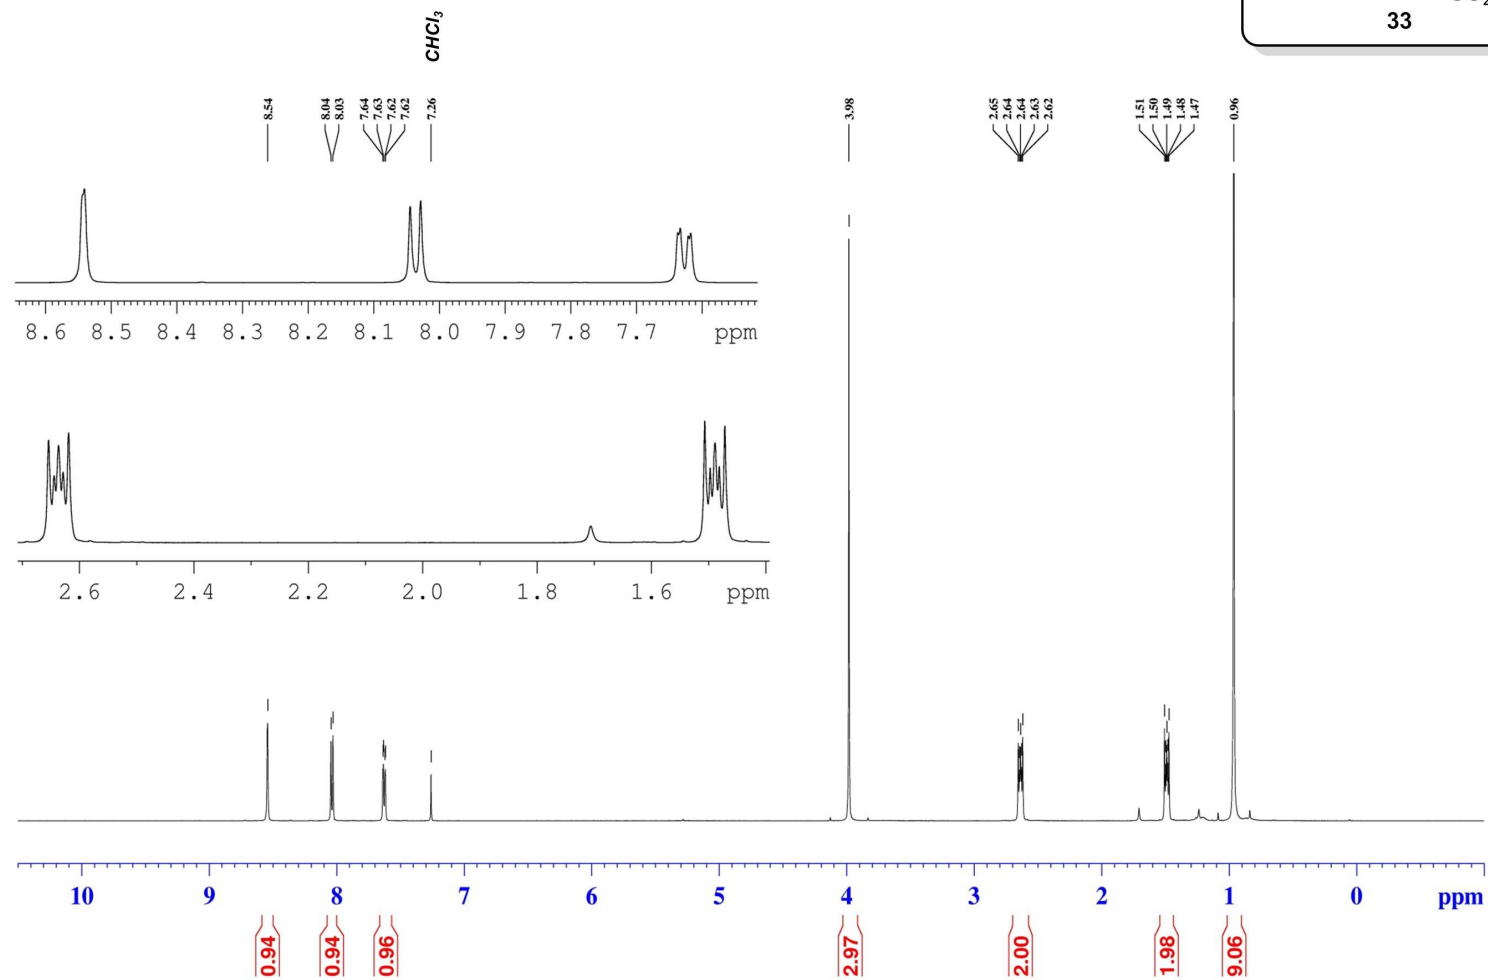

Methyl 5-(3,3-dimethylbutyl)picolinate  
125 MHz, CDCl<sub>3</sub>

<sup>13</sup>C NMR

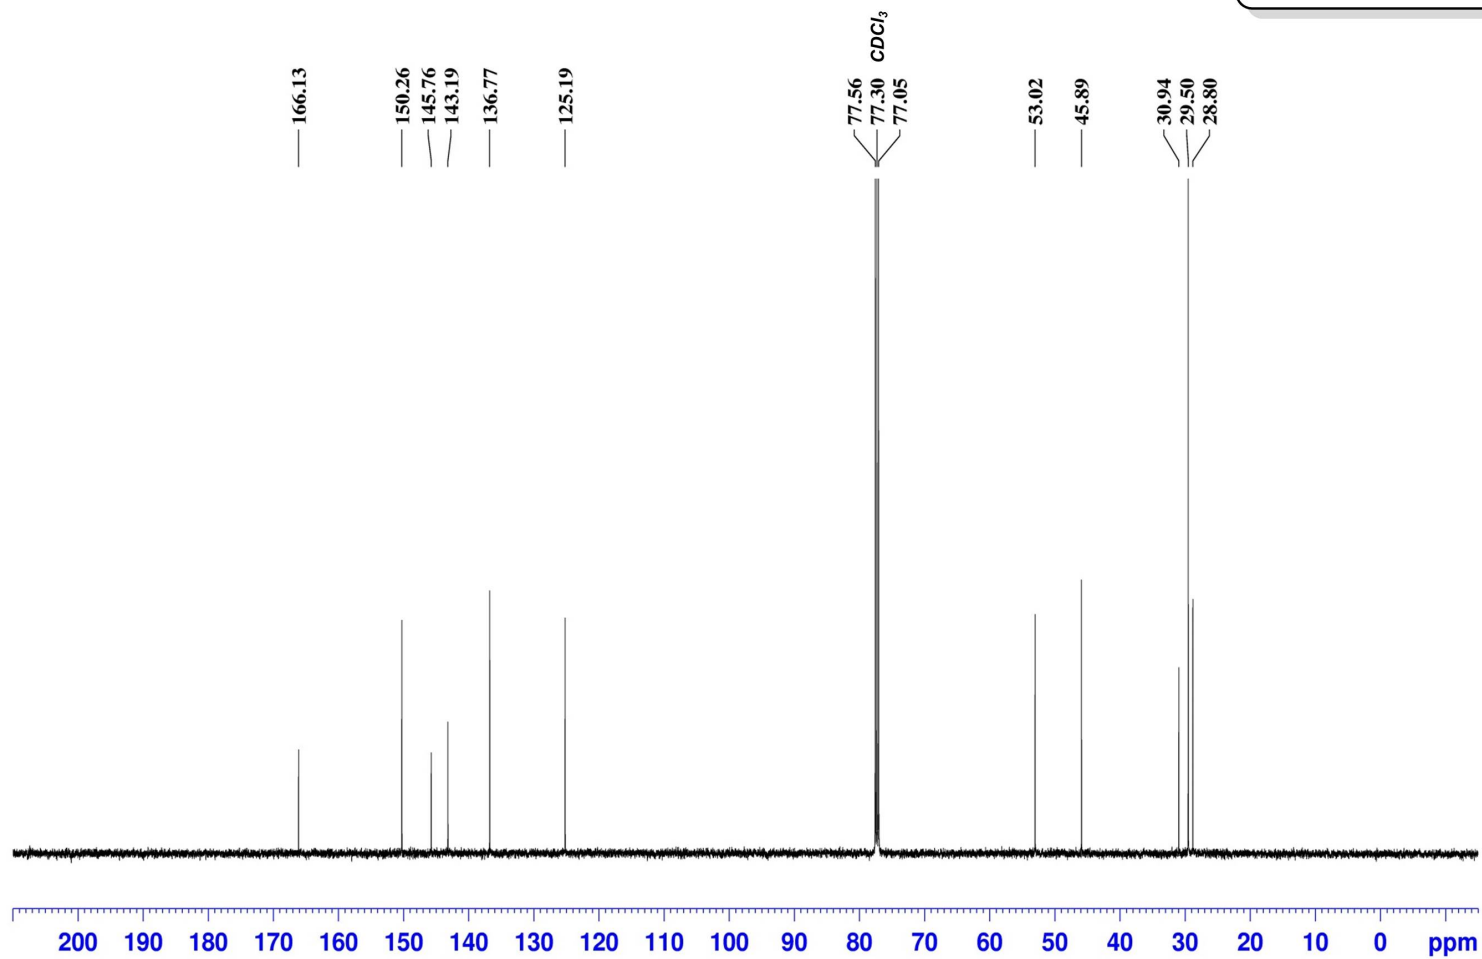



5-(3,3-dimethylbutyl)picolinonitrile  
500 MHz, CDCl<sub>3</sub>

<sup>1</sup>H NMR

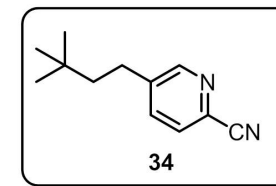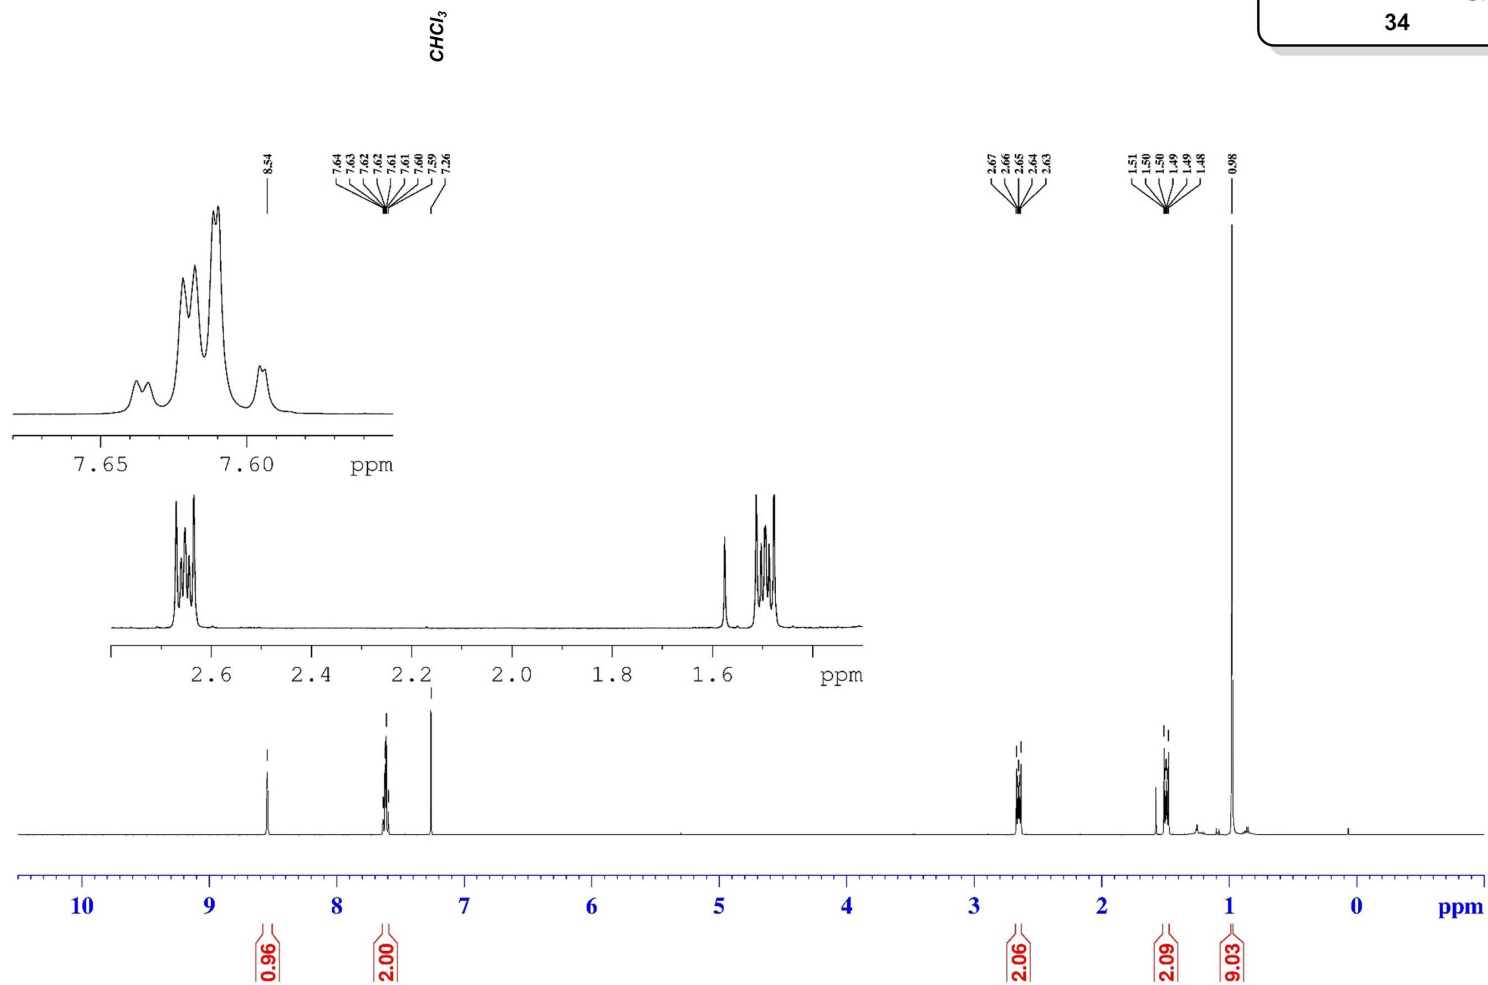

5-(3,3-Dimethylbutyl)picolinonitrile  
125 MHz, CDCl<sub>3</sub>

<sup>13</sup>C NMR

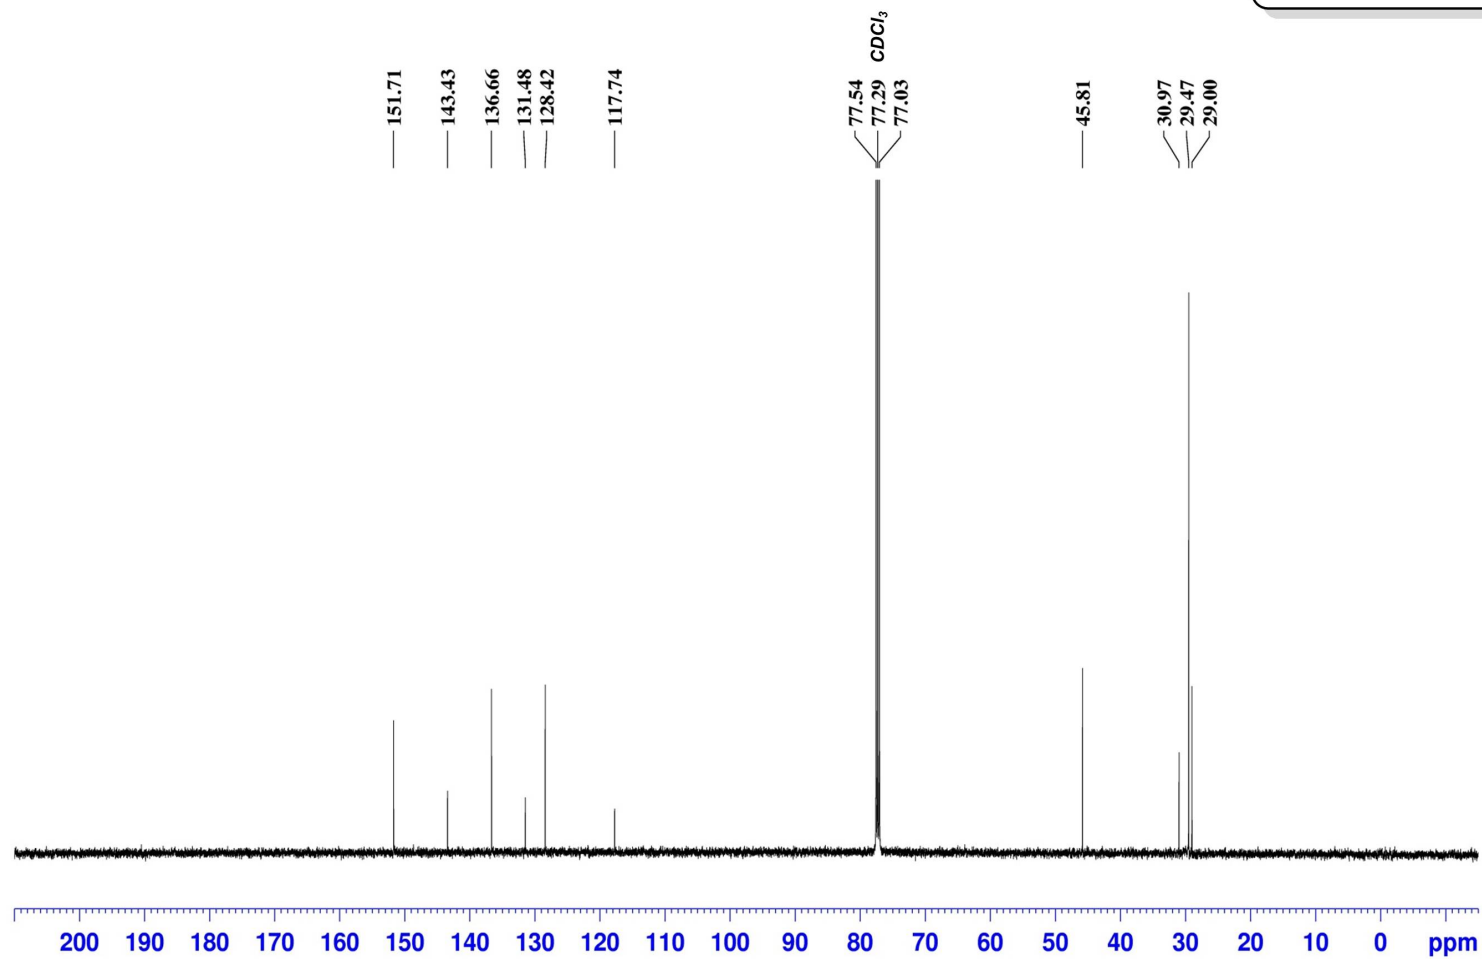

S250

**<sup>1</sup>H NMR**  
2-(1-(benzo[b]thiophen-5-yl)-3,3-dimethylbutyl)-4,4,5,5-tetramethyl-1,3,2-dioxaborolane  
500 MHz, CDCl<sub>3</sub>

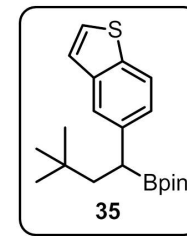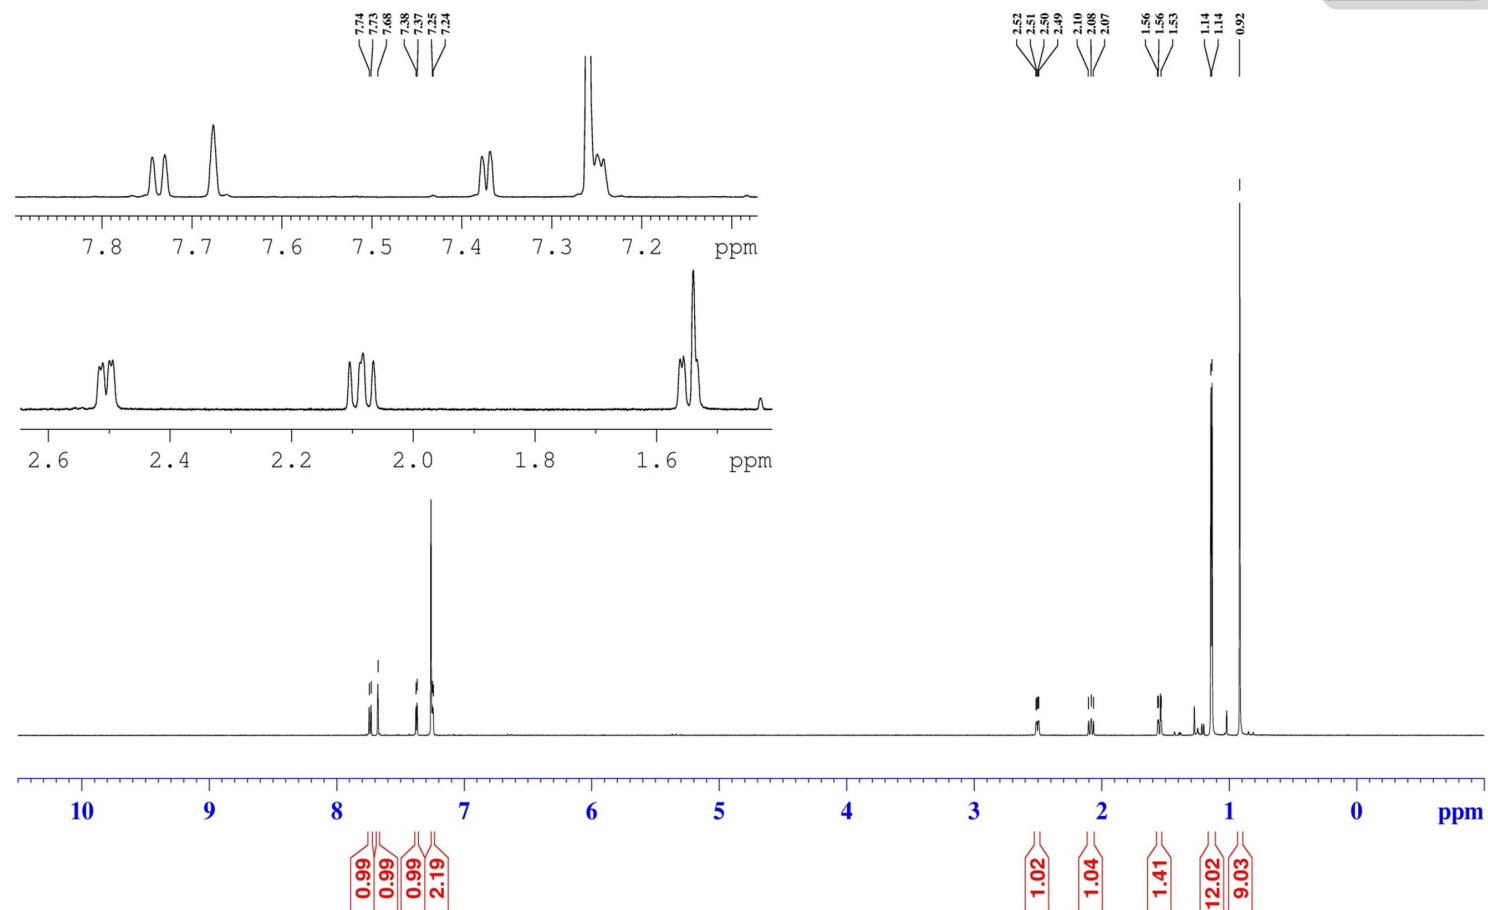

S251

**<sup>13</sup>C NMR**

2-(1-(Benzo[b]thiophen-5-yl)-3,3-dimethylbutyl)-4,4,5,5-tetramethyl-1,3,2-dioxaborolane  
125 MHz, CDCl<sub>3</sub>

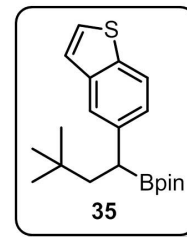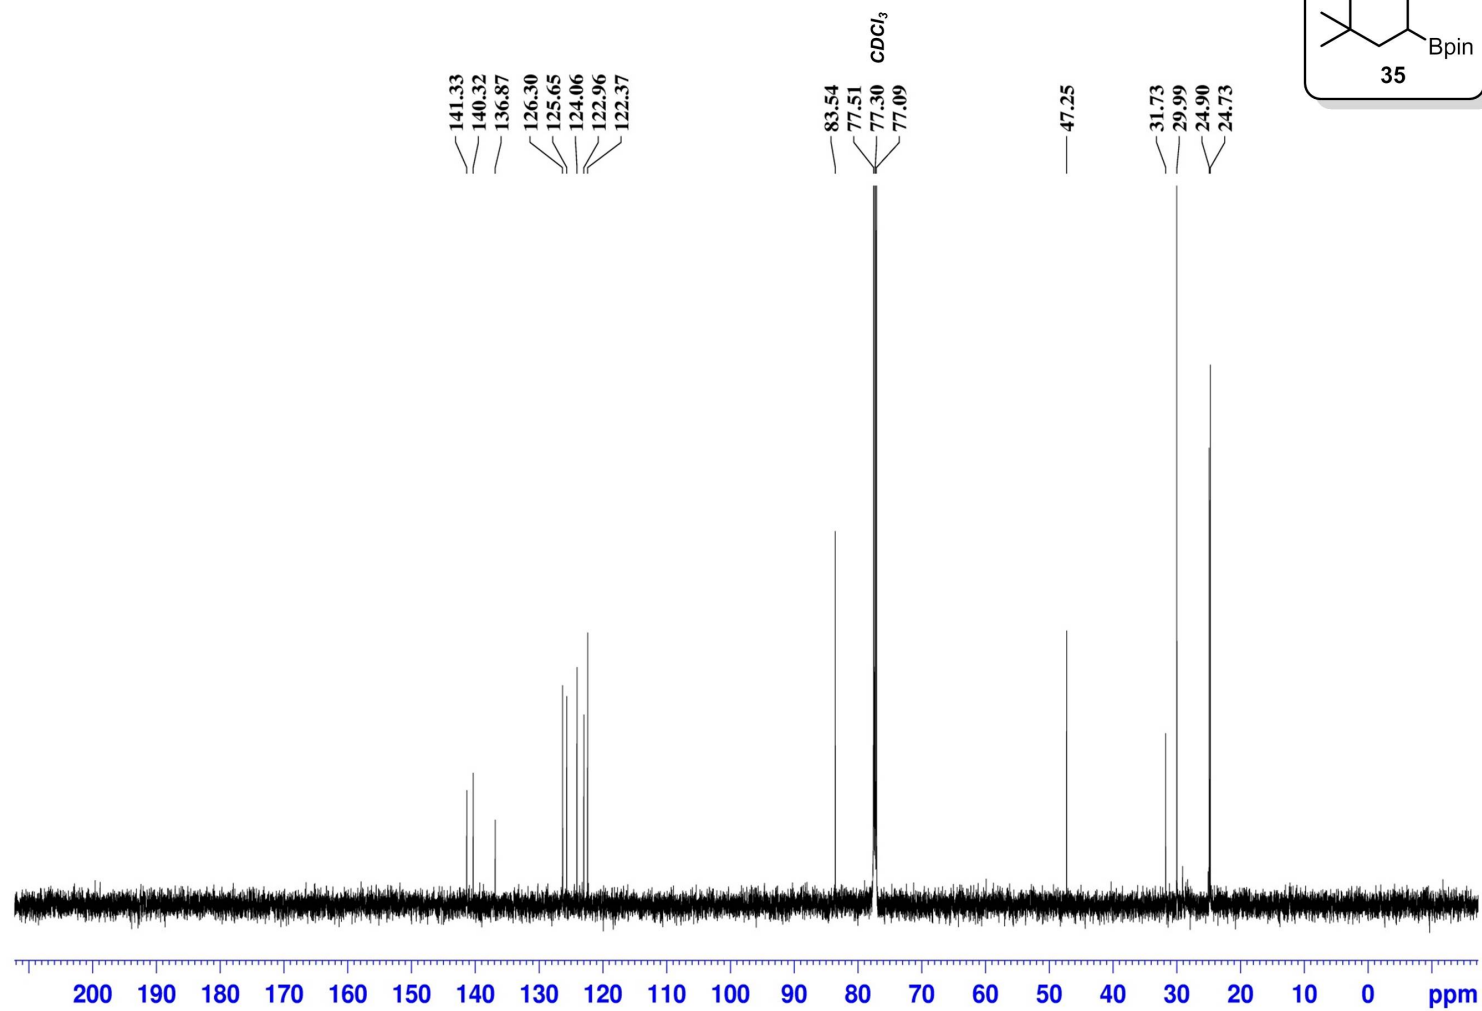

**<sup>11</sup>B NMR**  
2-(1-(benzo[b]thiophen-5-yl)-3,3-dimethylbutyl)-4,4,5,5-tetramethyl-1,3,2-dioxaborolane  
128 MHz, CDCl<sub>3</sub>

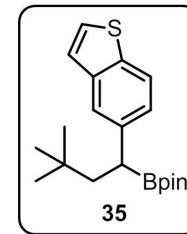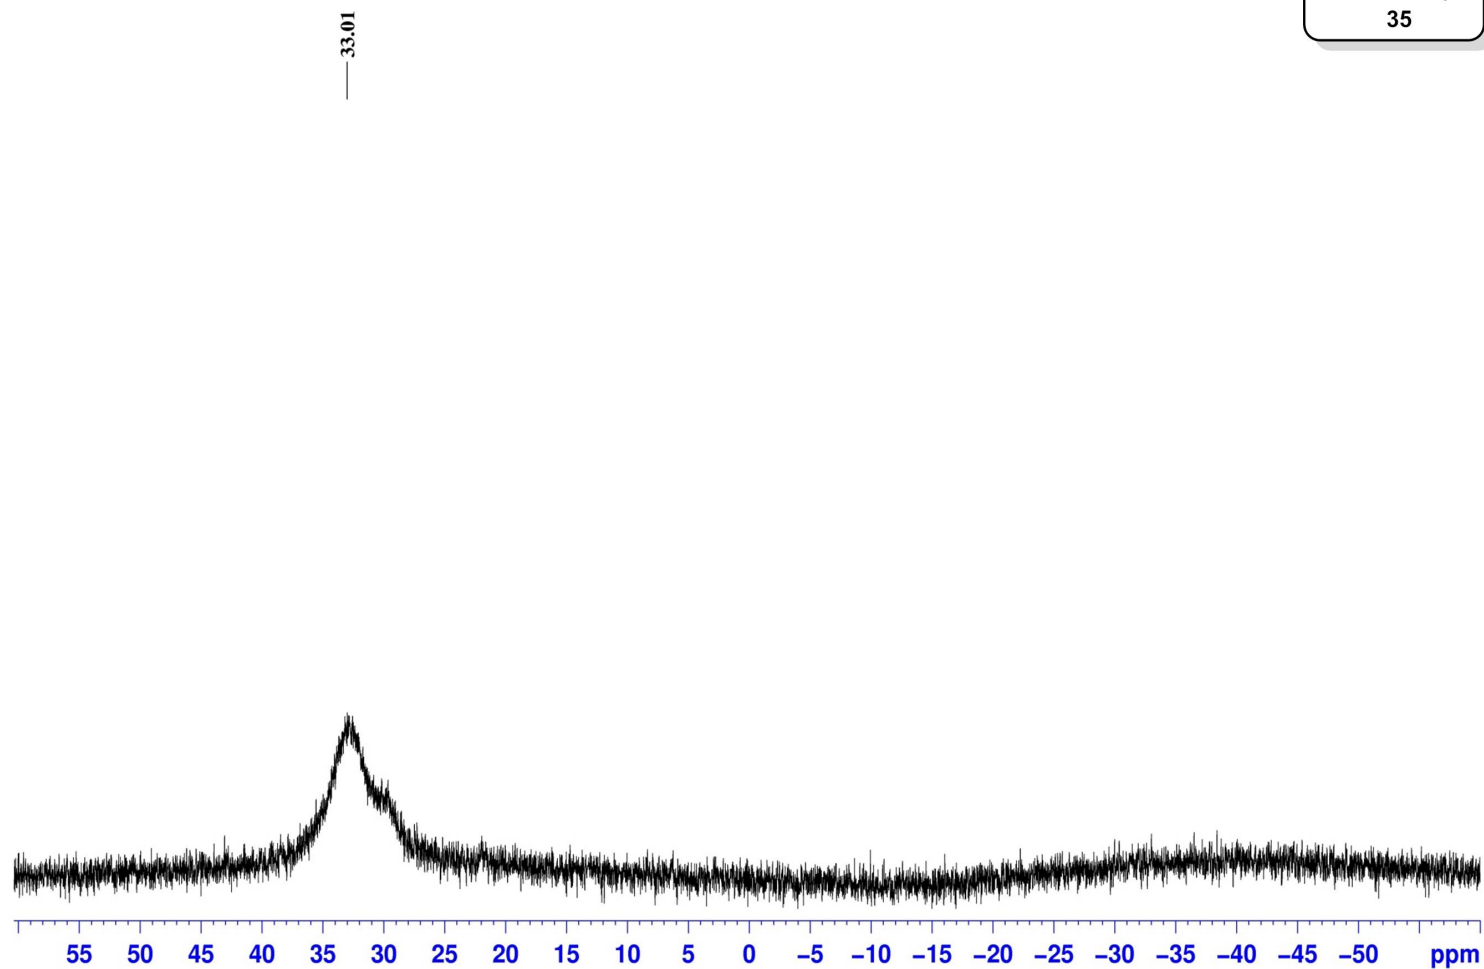

S253

**<sup>1</sup>H NMR**  
4-(3,3-dimethyl-1-(4,4,5,5-tetramethyl-1,3,2-dioxaborolan-2-yl)butyl)phenyl)trimethylsilane  
500 MHz, CDCl<sub>3</sub>

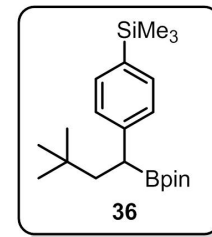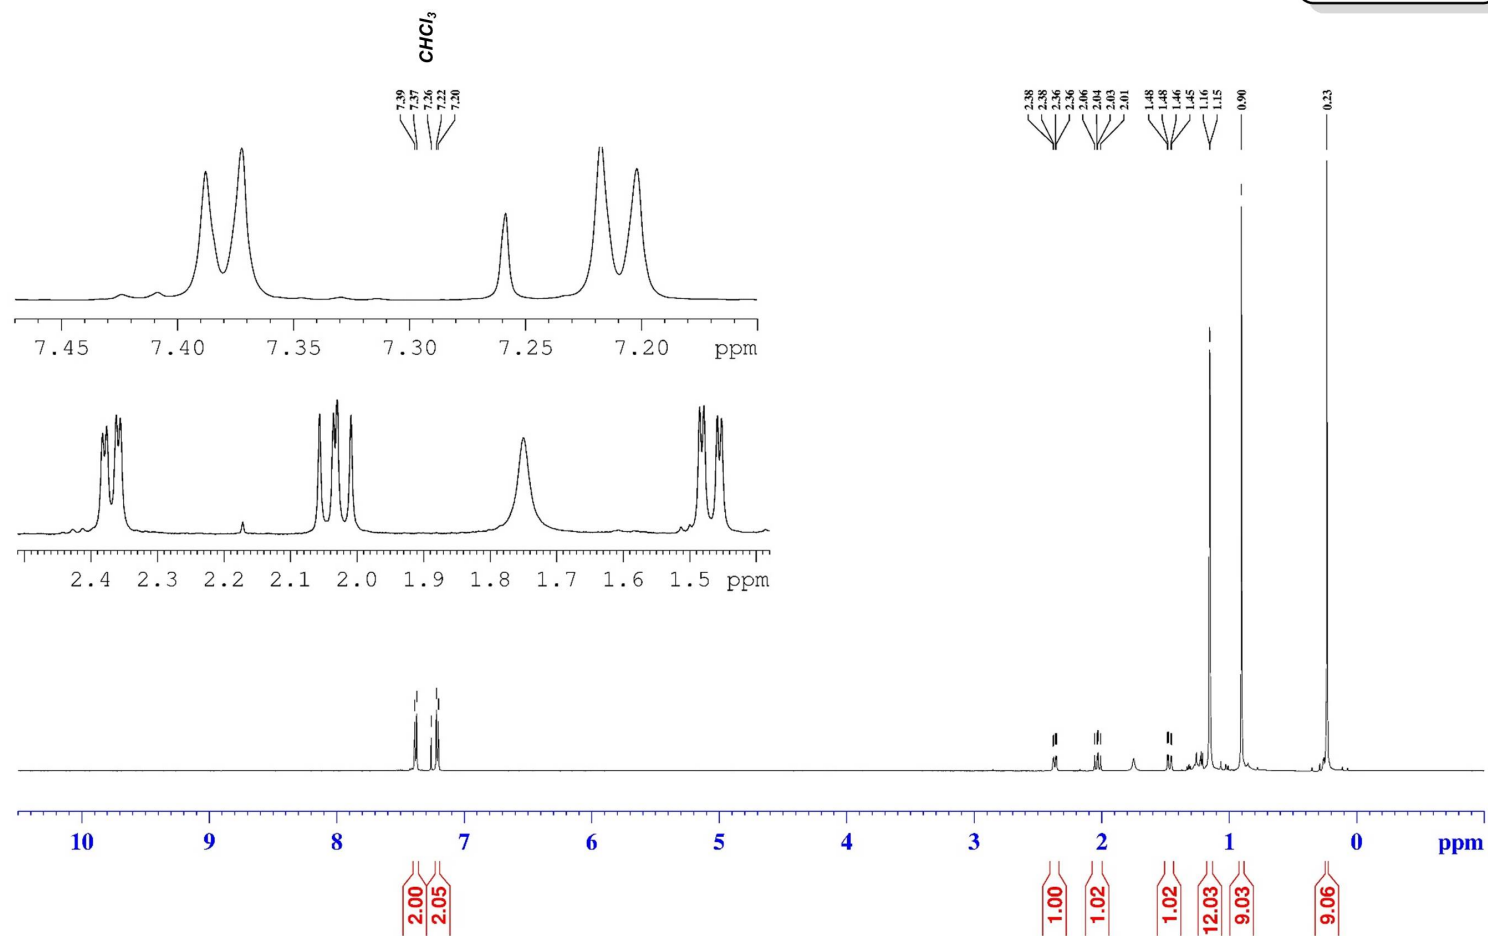

**<sup>13</sup>C NMR**

4-(3,3-Dimethyl-1-(4,4,5,5-tetramethyl-1,3,2-dioxaborolan-2-yl)butyl)phenyl)trimethylsilane  
125 MHz, CDCl<sub>3</sub>

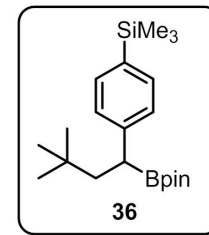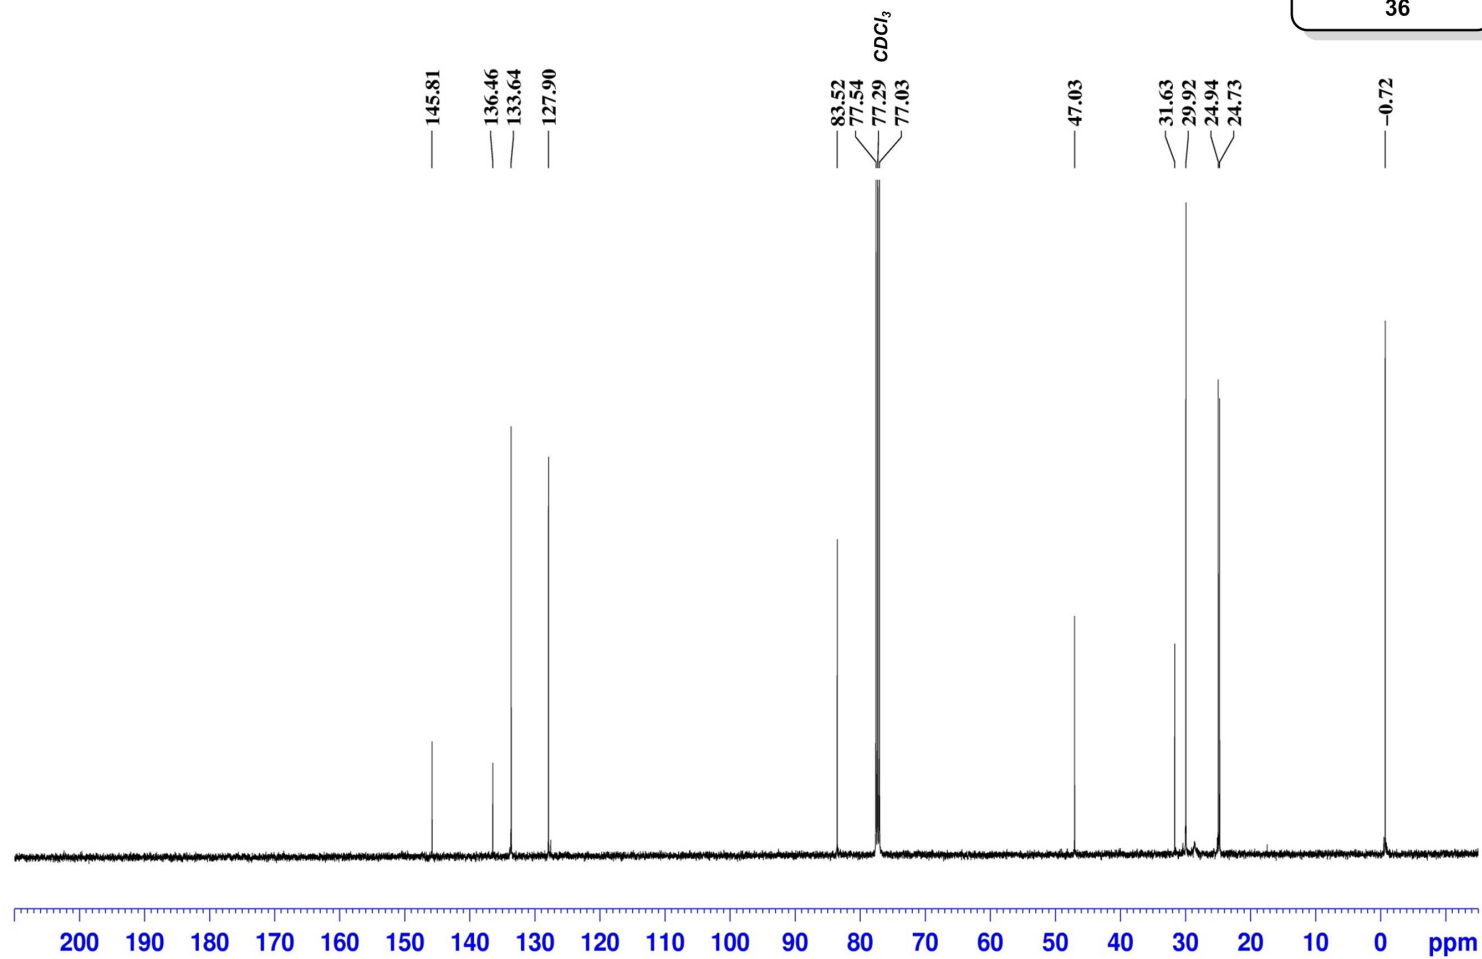

**<sup>11</sup>B NMR**

4-(3,3-dimethyl-1-(4,4,5,5-tetramethyl-1,3,2-dioxaborolan-2-yl)butyl)phenyl)trimethylsilane  
128 MHz, CDCl<sub>3</sub>

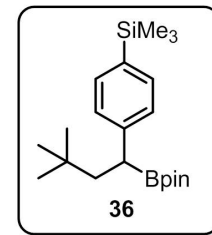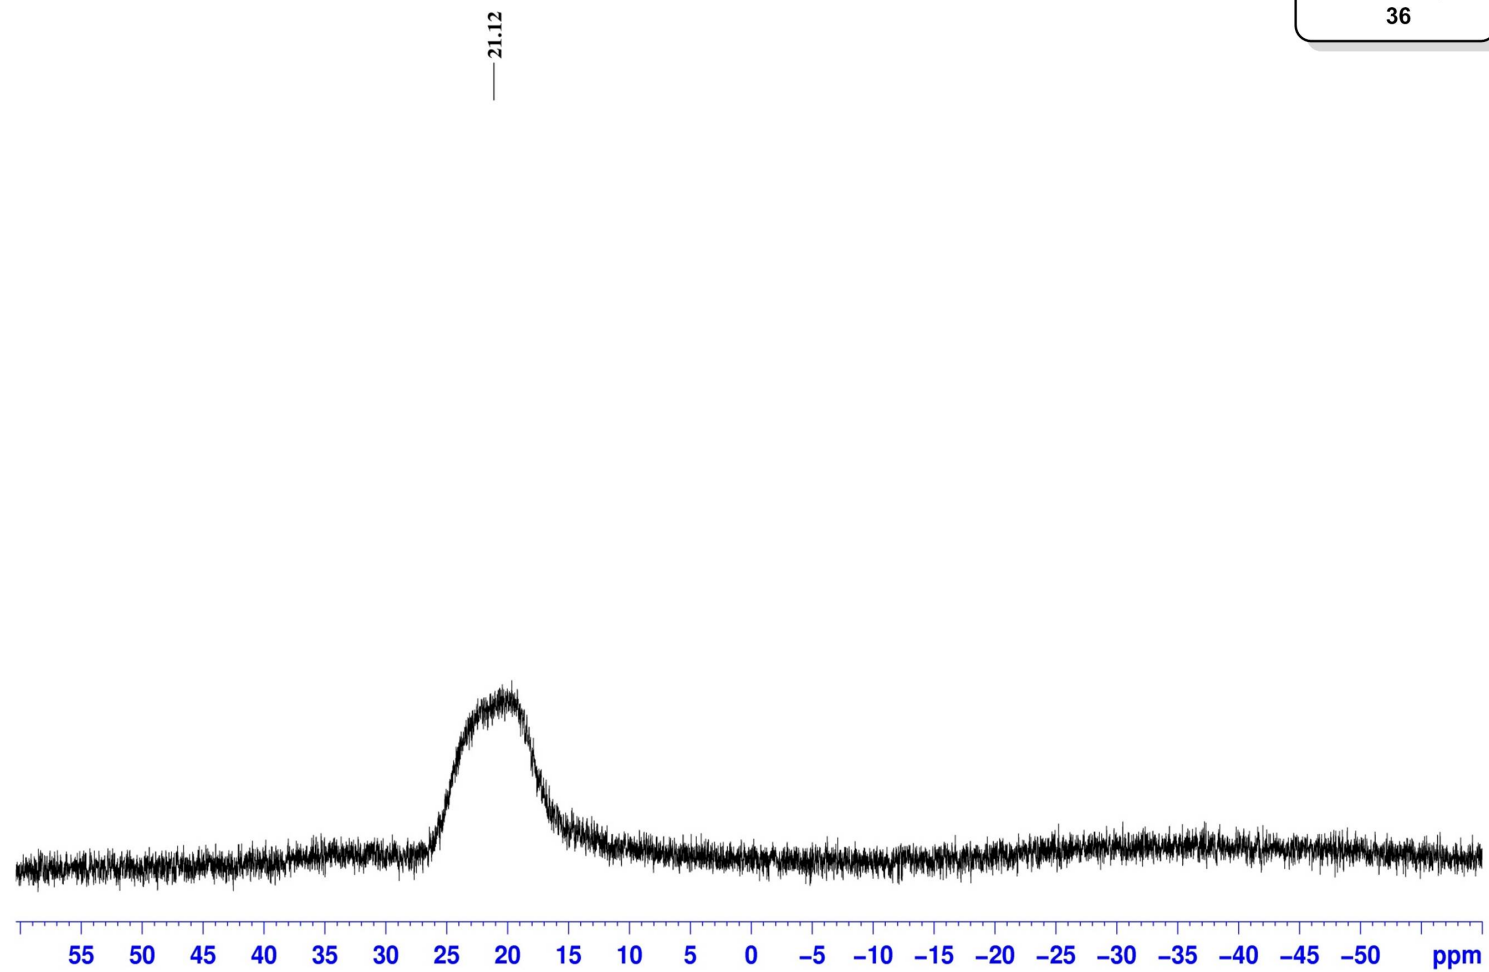

S256



# <sup>1</sup>H NMR

2-(4-(3,3-dimethyl-1-(4,4,5,5-tetramethyl-1,3,2-dioxaborolan-2-yl)butyl)phenyl)-4,4,5,5-tetramethyl-1,3,2-dioxaborolane  
500 MHz, CDCl<sub>3</sub>

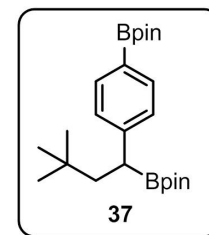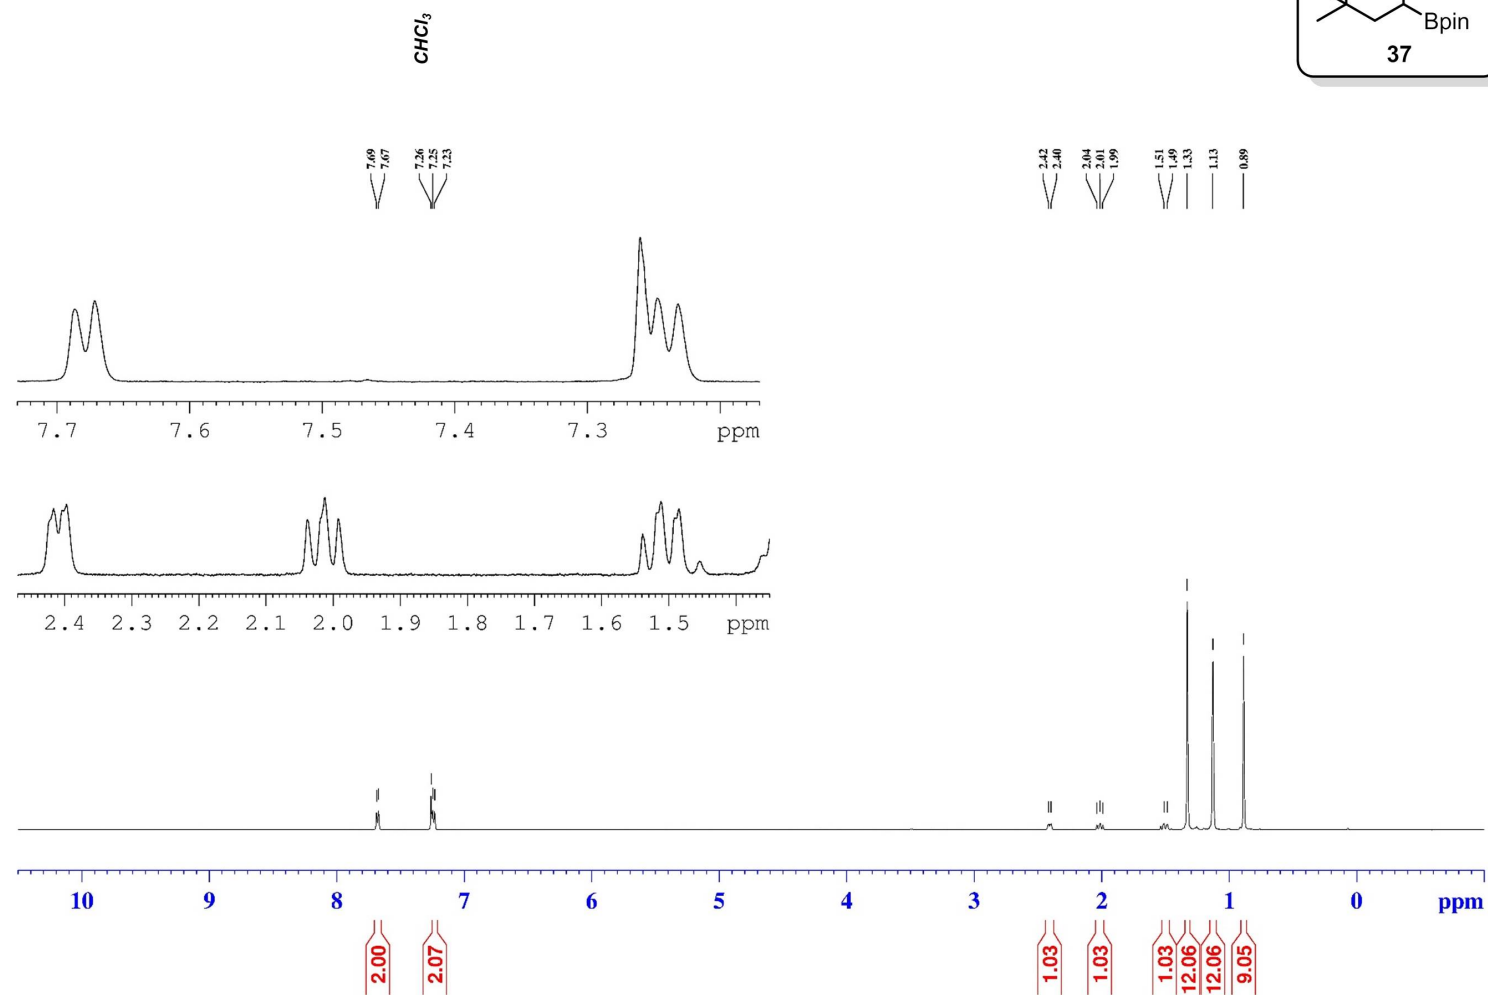

**<sup>13</sup>C NMR**

2-(4-(3,3-Dimethyl-1-(4,4,5,5-tetramethyl-1,3,2-dioxaborolan-2-yl)butyl)phenyl)-4,4,5,5-tetramethyl-1,3,2-dioxaborolane  
125 MHz, CDCl<sub>3</sub>

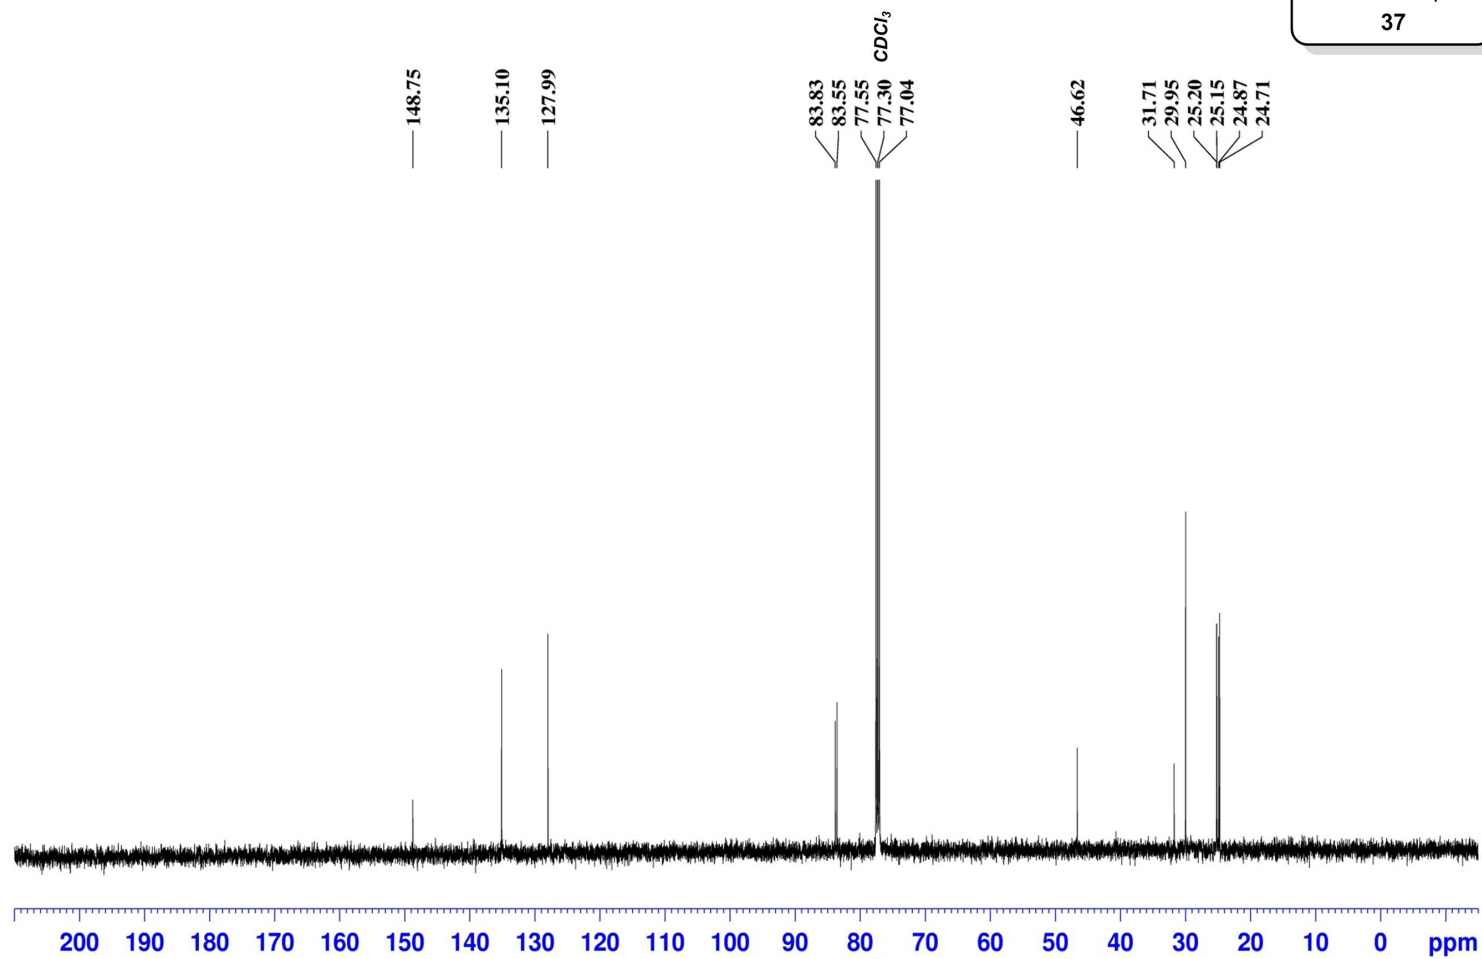

**<sup>11</sup>B NMR**

2-(4-(3,3-dimethyl-1-(4,4,5,5-tetramethyl-1,3,2-dioxaborolan-2-yl)butyl)phenyl)-4,4,5,5-tetramethyl-1,3,2-dioxaborolane  
128 MHz, CDCl<sub>3</sub>

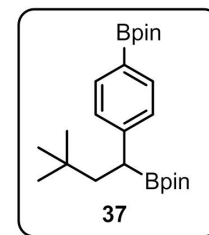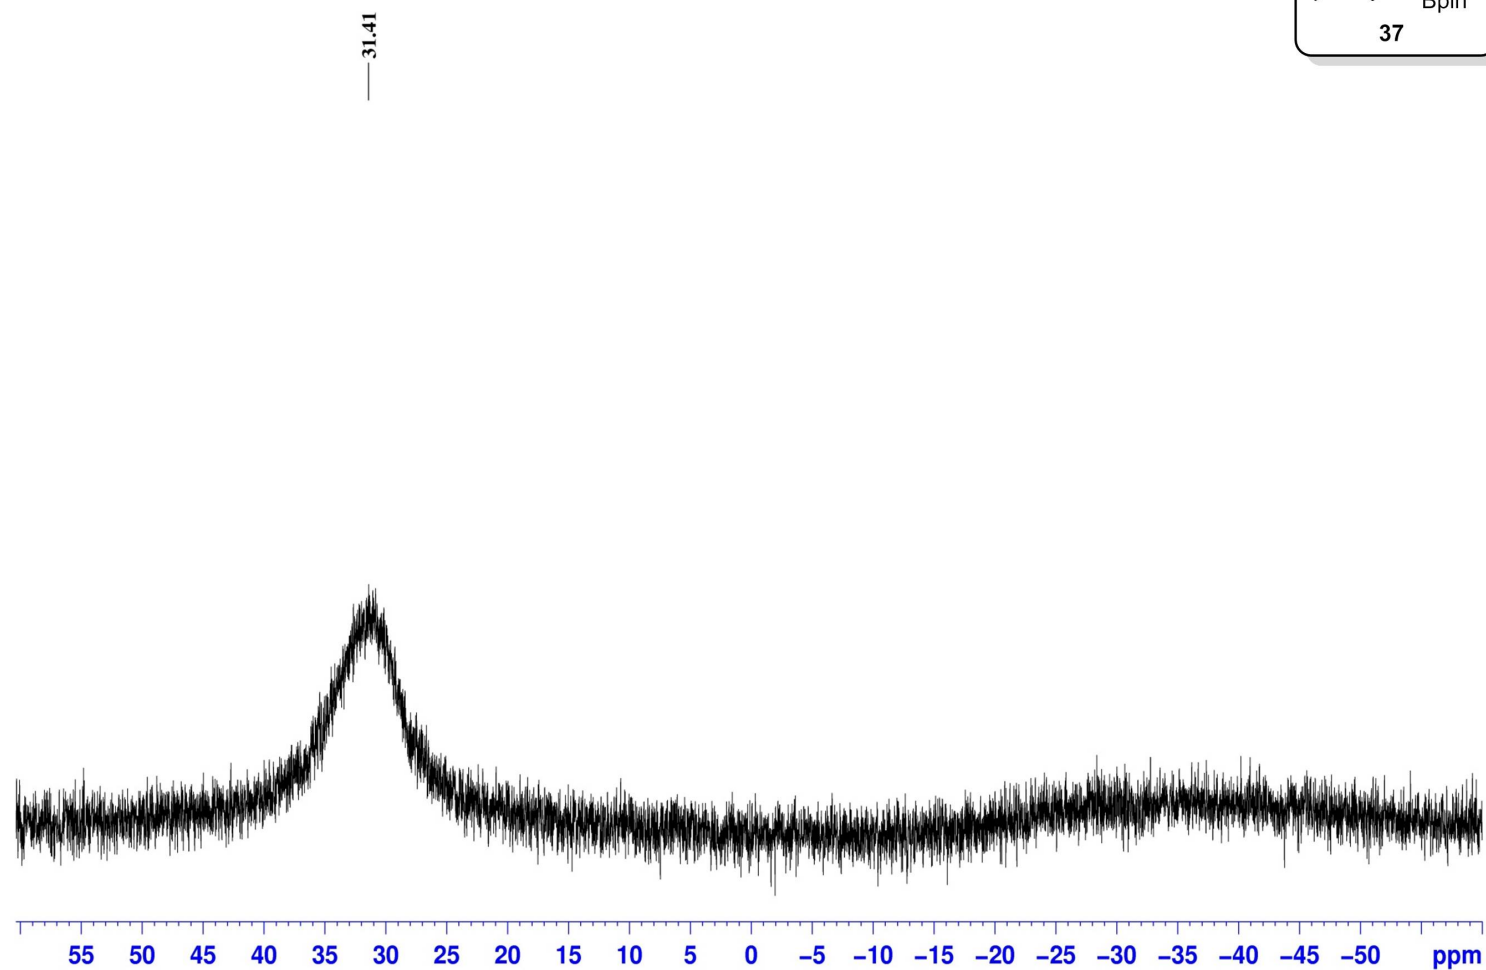

# <sup>1</sup>H NMR

4-(3,3-dimethyl-1-(4,4,5,5-tetramethyl-1,3,2-dioxaborolan-2-yl)butyl)phenyl trifluoromethanesulfonate  
500 MHz, CDCl<sub>3</sub>

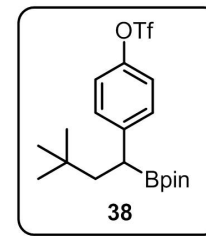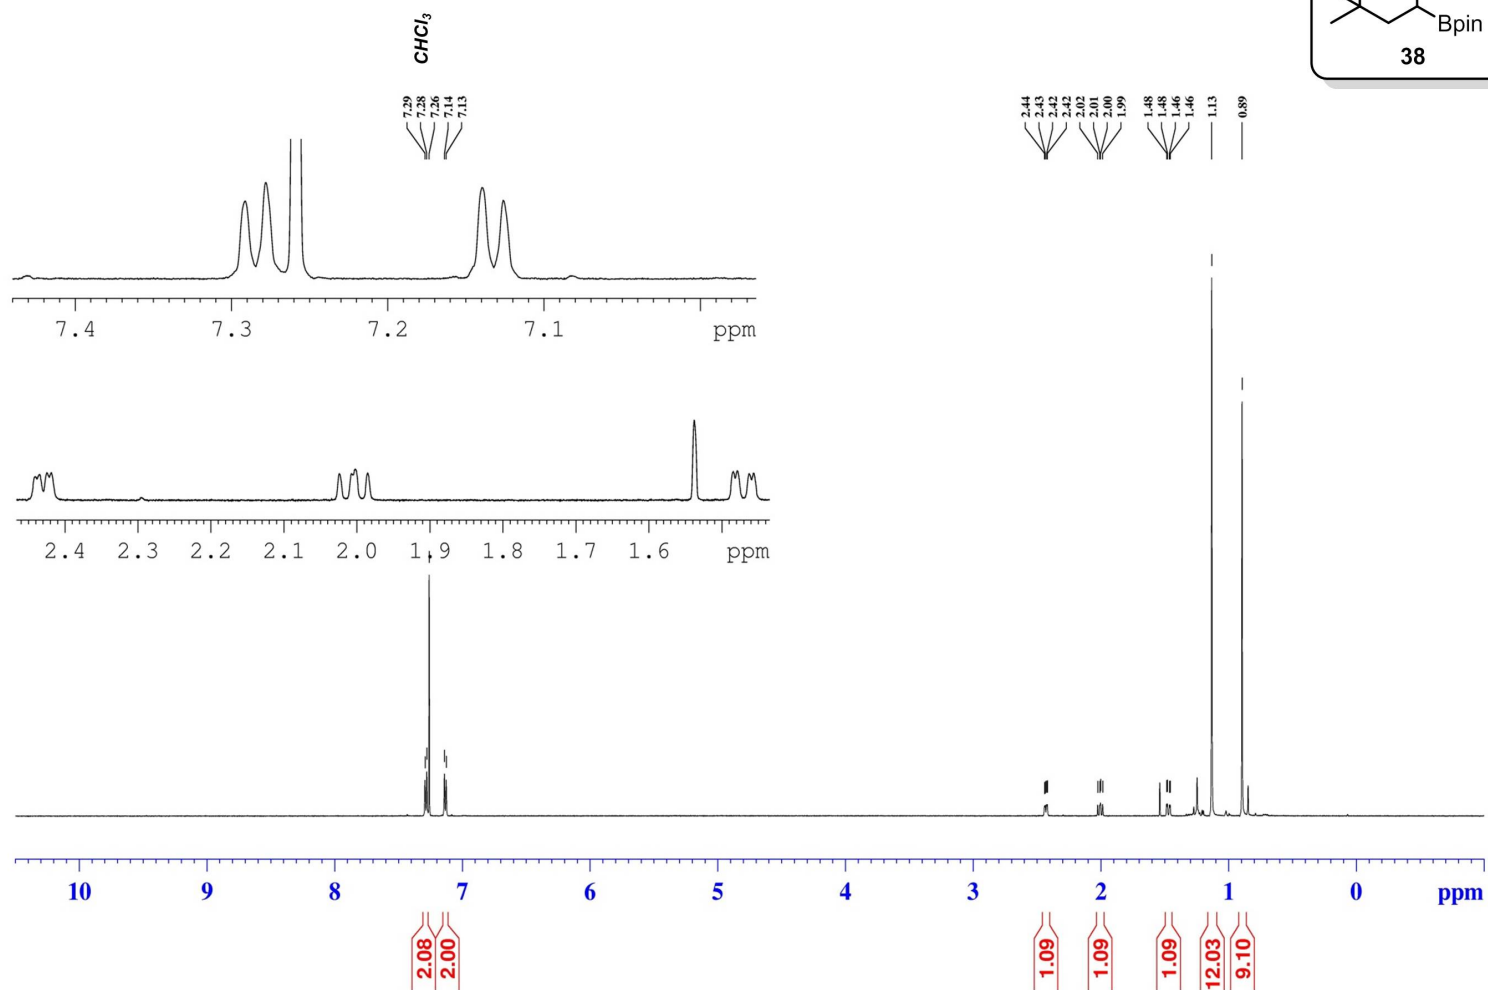

**<sup>13</sup>C NMR**

4-(3,3-Dimethyl-1-(4,4,5,5-tetramethyl-1,3,2-dioxaborolan-2-yl)butyl)phenyl trifluoromethanesulfonate  
125 MHz, CDCl<sub>3</sub>

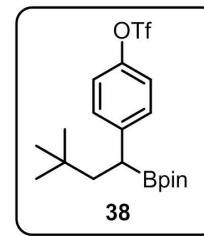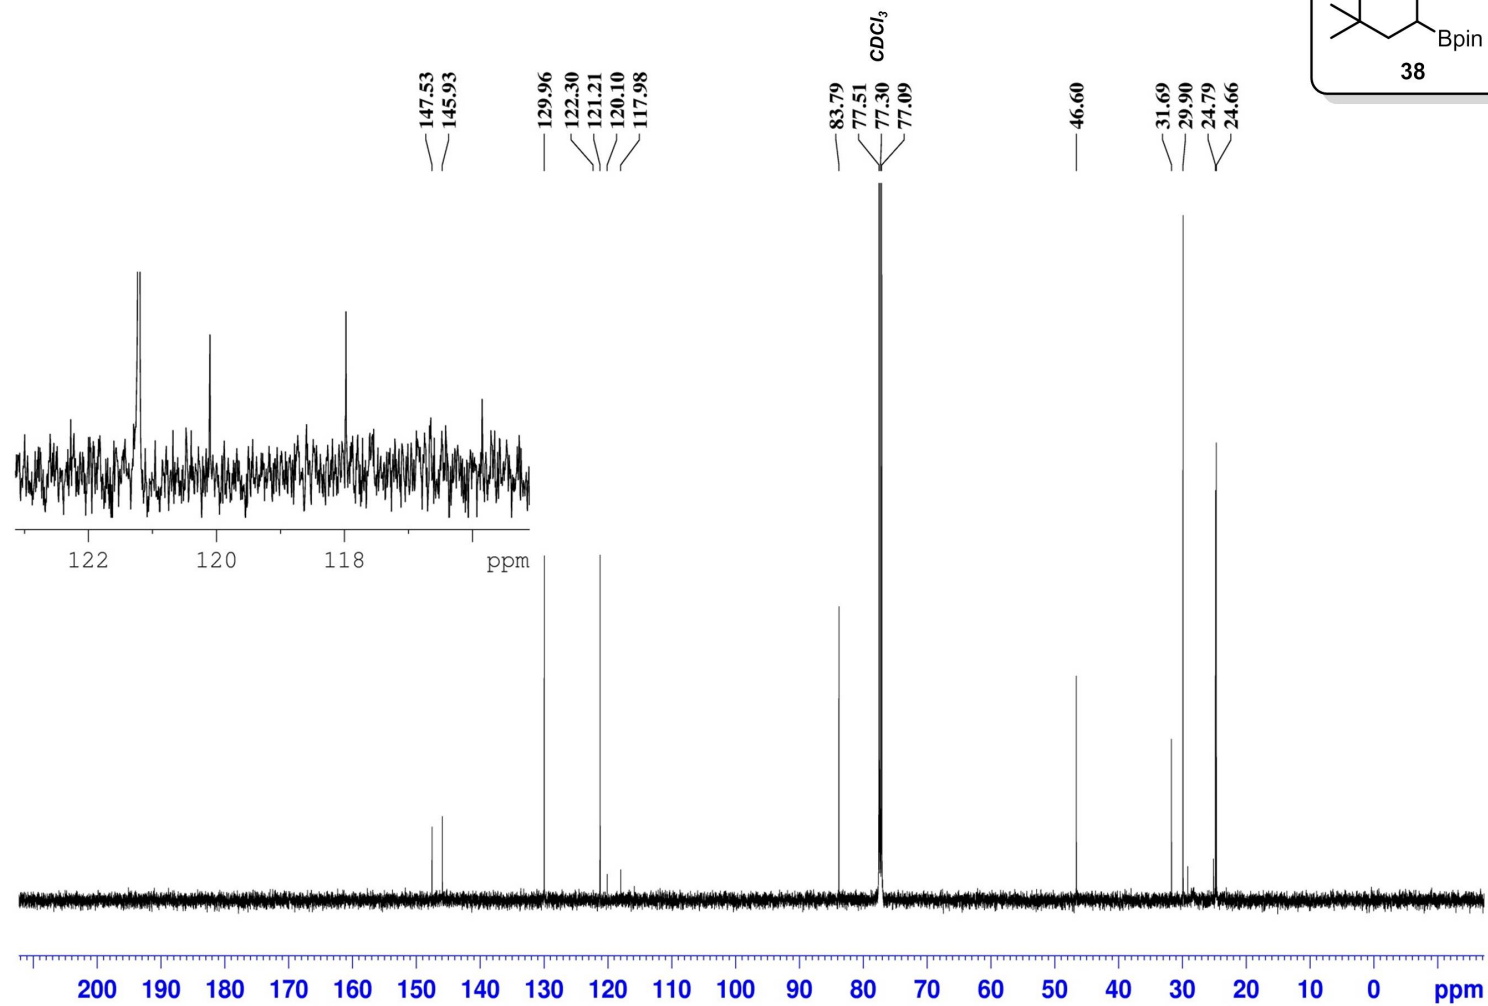

**<sup>19</sup>F NMR**

4-(3,3-dimethyl-1-(4,4,5,5-tetramethyl-1,3,2-dioxaborolan-2-yl)butyl)phenyl trifluoromethanesulfonate  
471 MHz, CDCl<sub>3</sub>

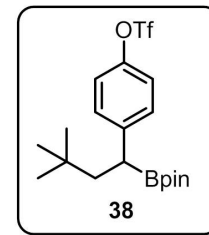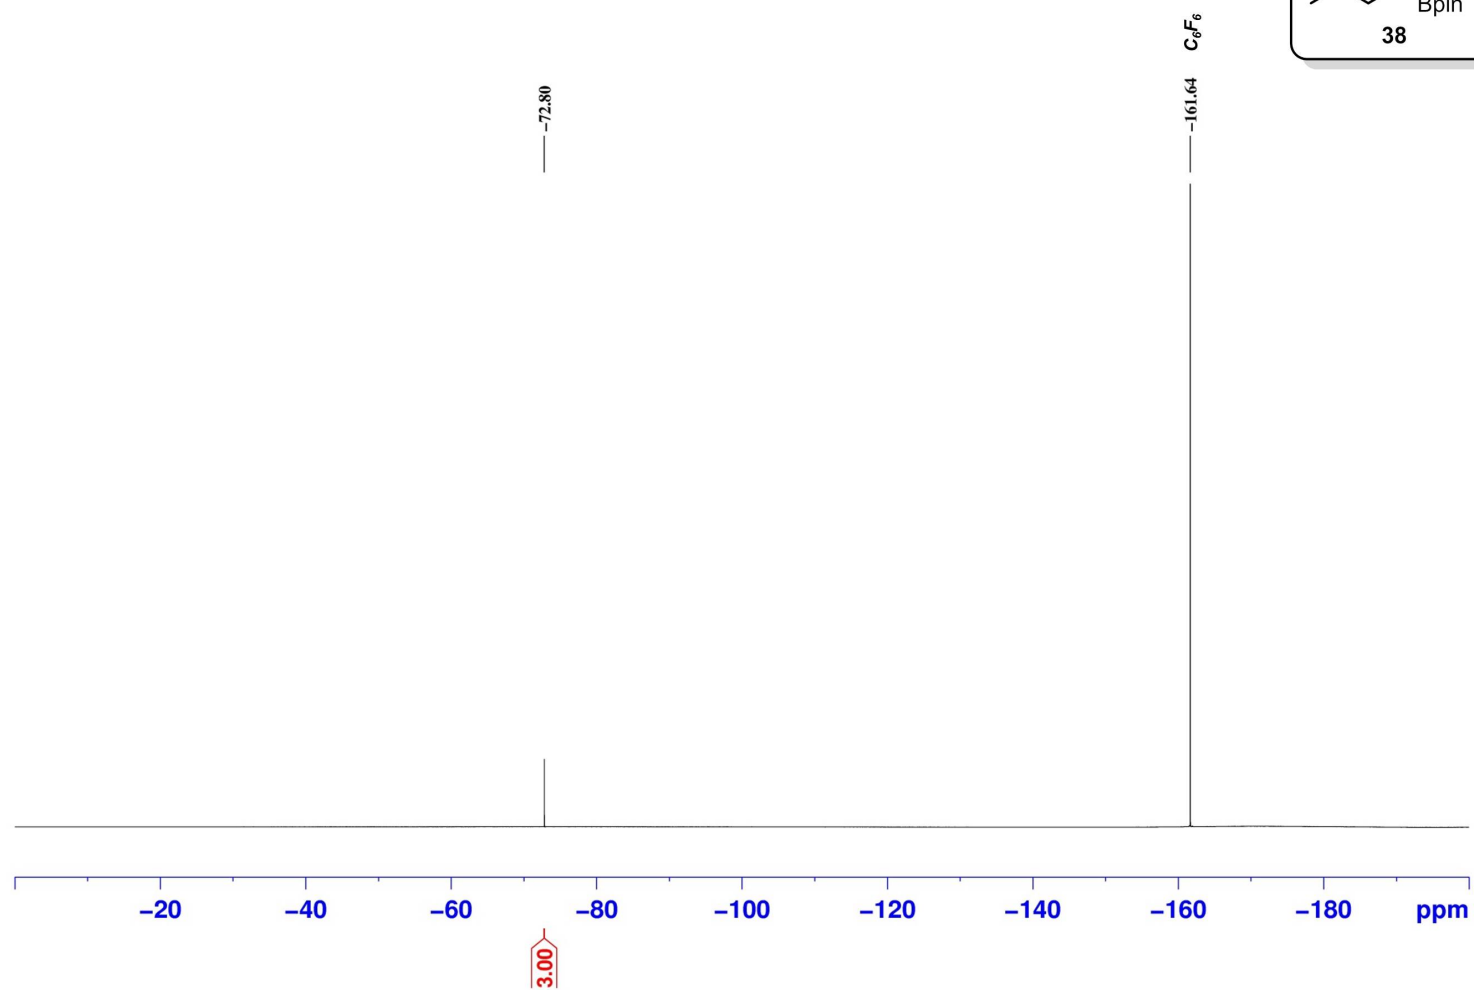

**<sup>11</sup>B NMR**

4-(3,3-dimethyl-1-(4,4,5,5-tetramethyl-1,3,2-dioxaborolan-2-yl)butyl)phenyl trifluoromethanesulfonate  
128 MHz, CDCl<sub>3</sub>

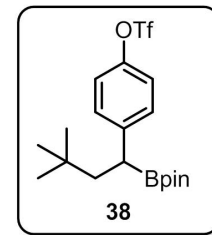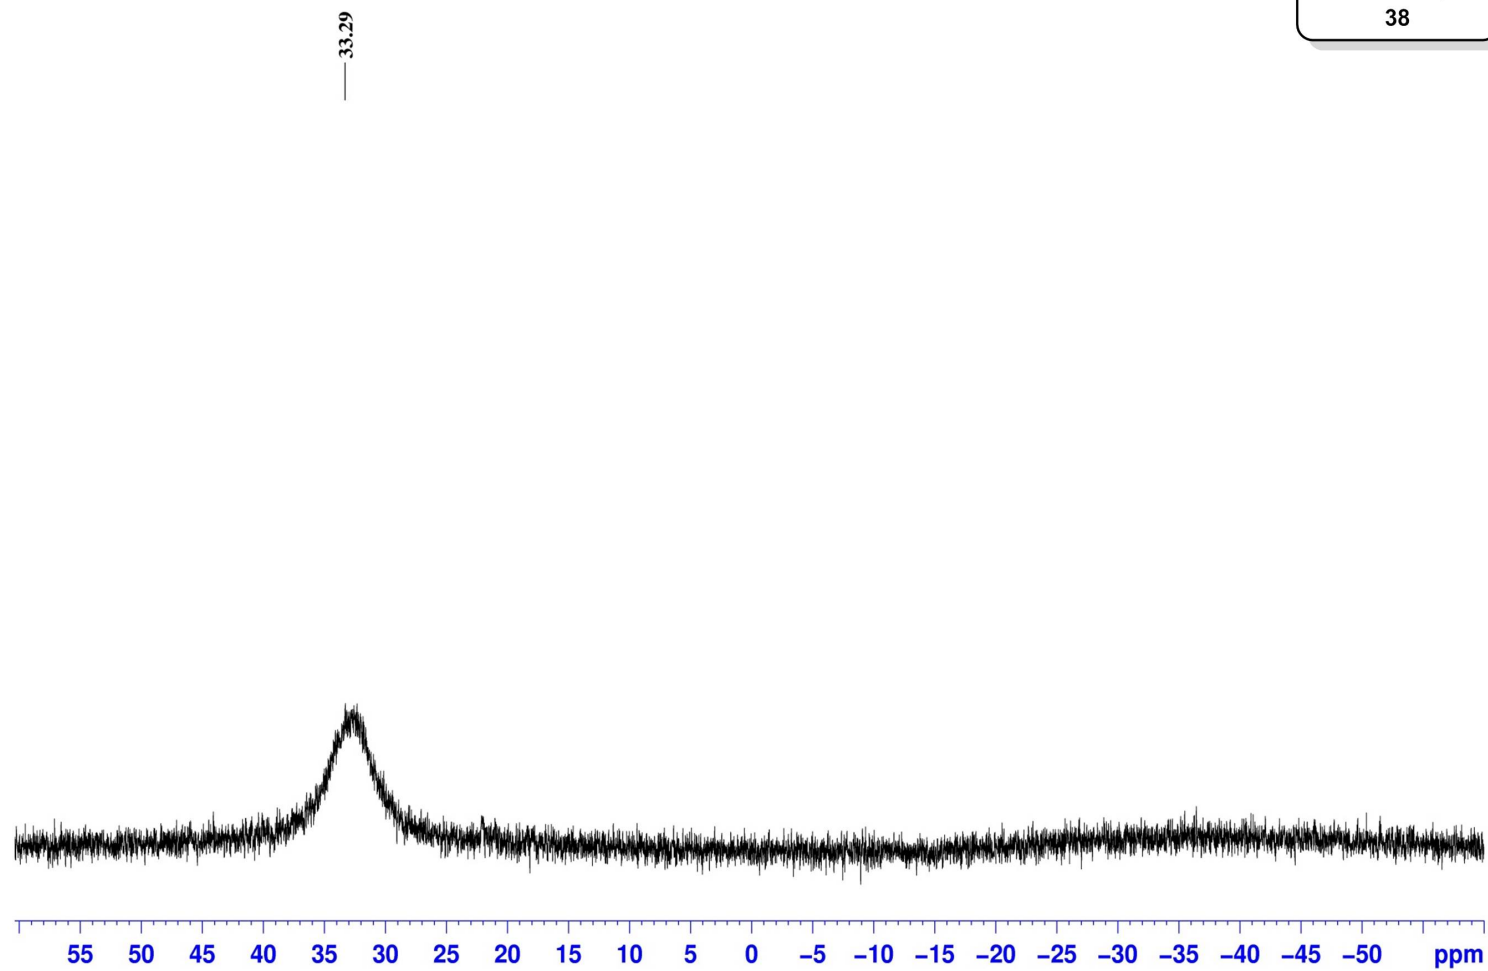

**<sup>1</sup>H NMR**

2-(1-(4-iodophenyl)-3,3-dimethylbutyl)-4,4,5,5-tetramethyl-1,3,2-dioxaborolane  
500 MHz, CDCl<sub>3</sub>

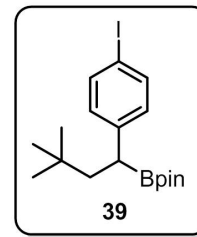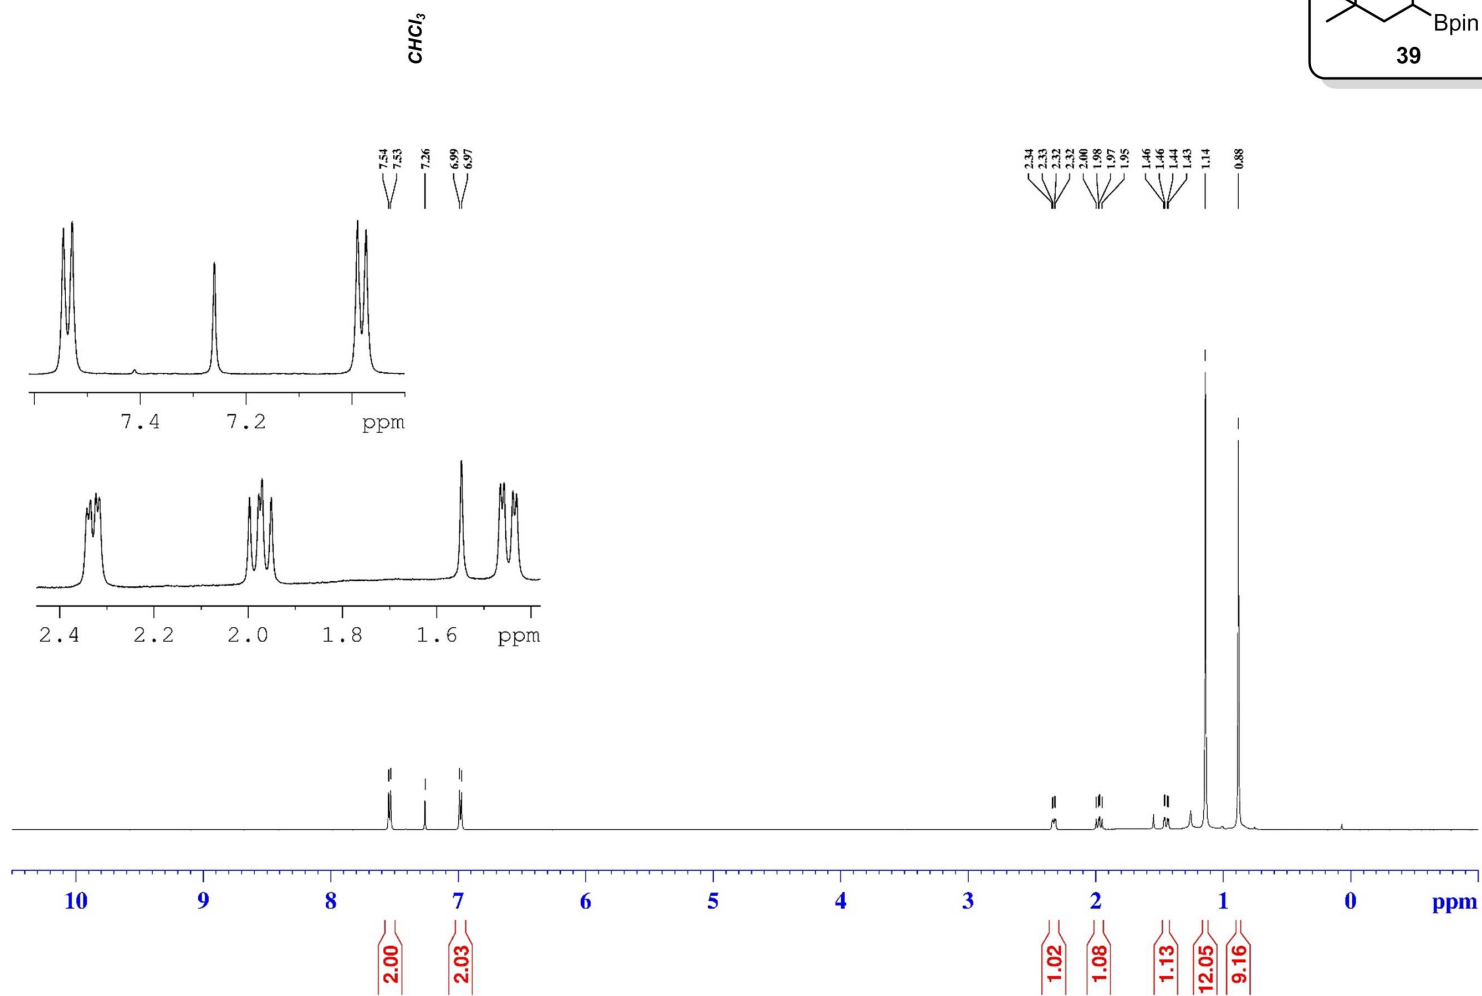



<sup>13</sup>C NMR

2-(1-(4-iodophenyl)-3,3-dimethylbutyl)-4,4,5,5-tetramethyl-1,3,2-dioxaborolane  
125 MHz, CDCl<sub>3</sub>

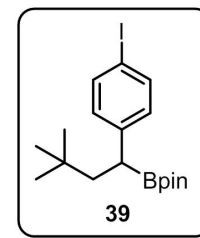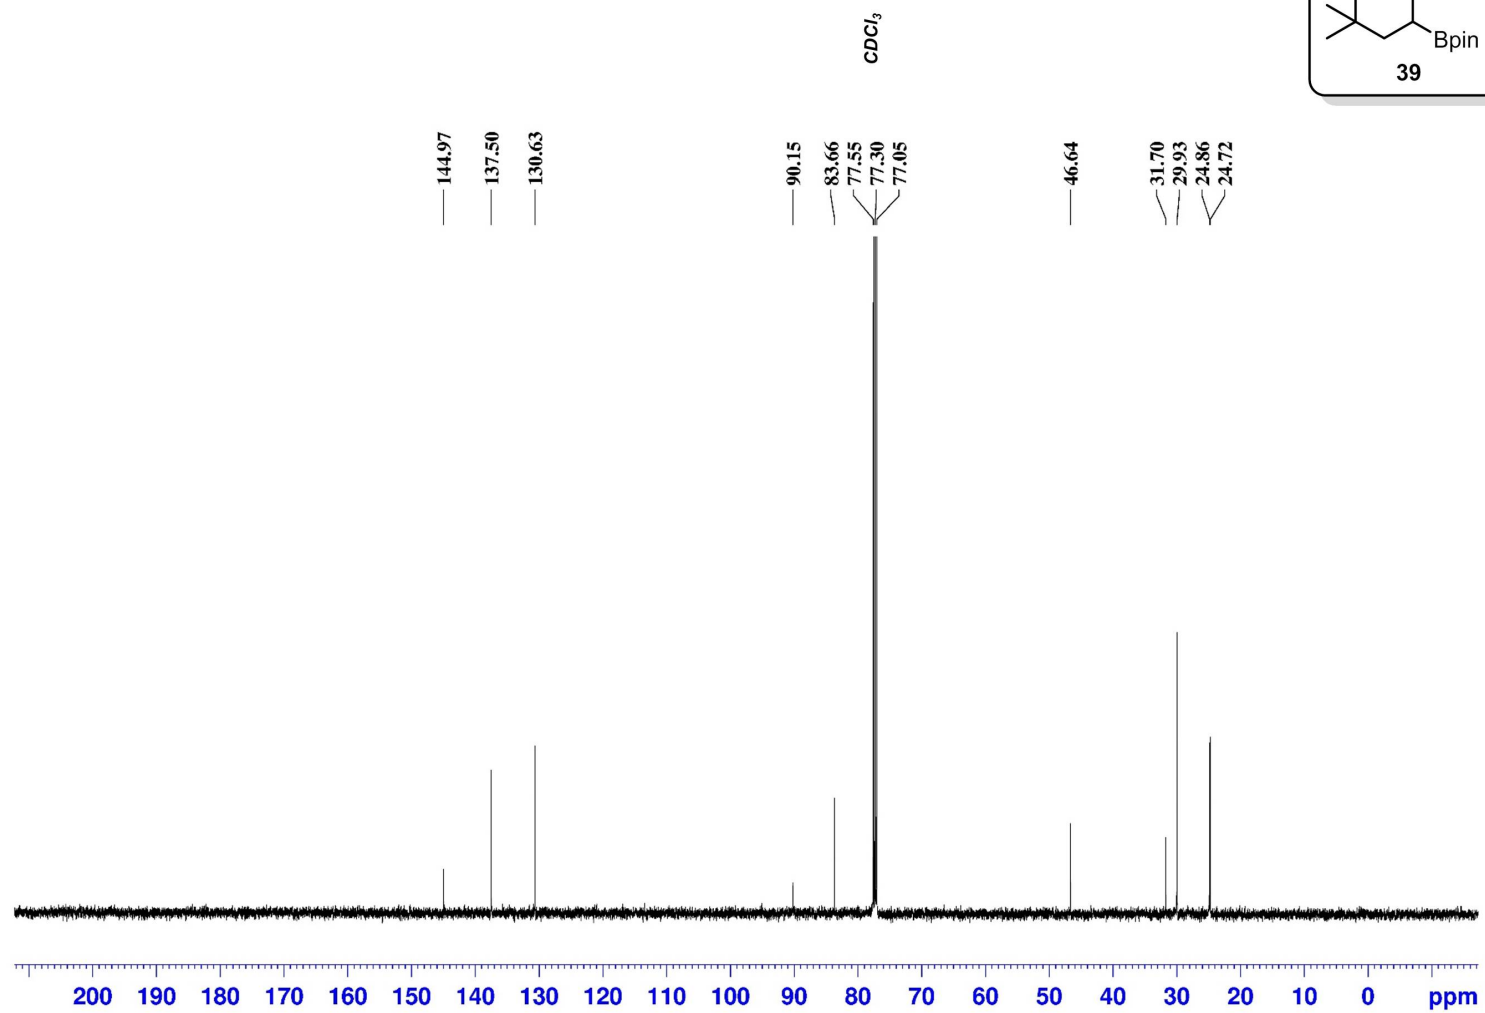

**<sup>11</sup>B NMR**

2-(1-(4-iodophenyl)-3,3-dimethylbutyl)-4,4,5,5-tetramethyl-1,3,2-dioxaborolane  
128 MHz, CDCl<sub>3</sub>

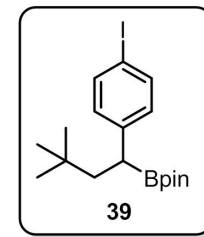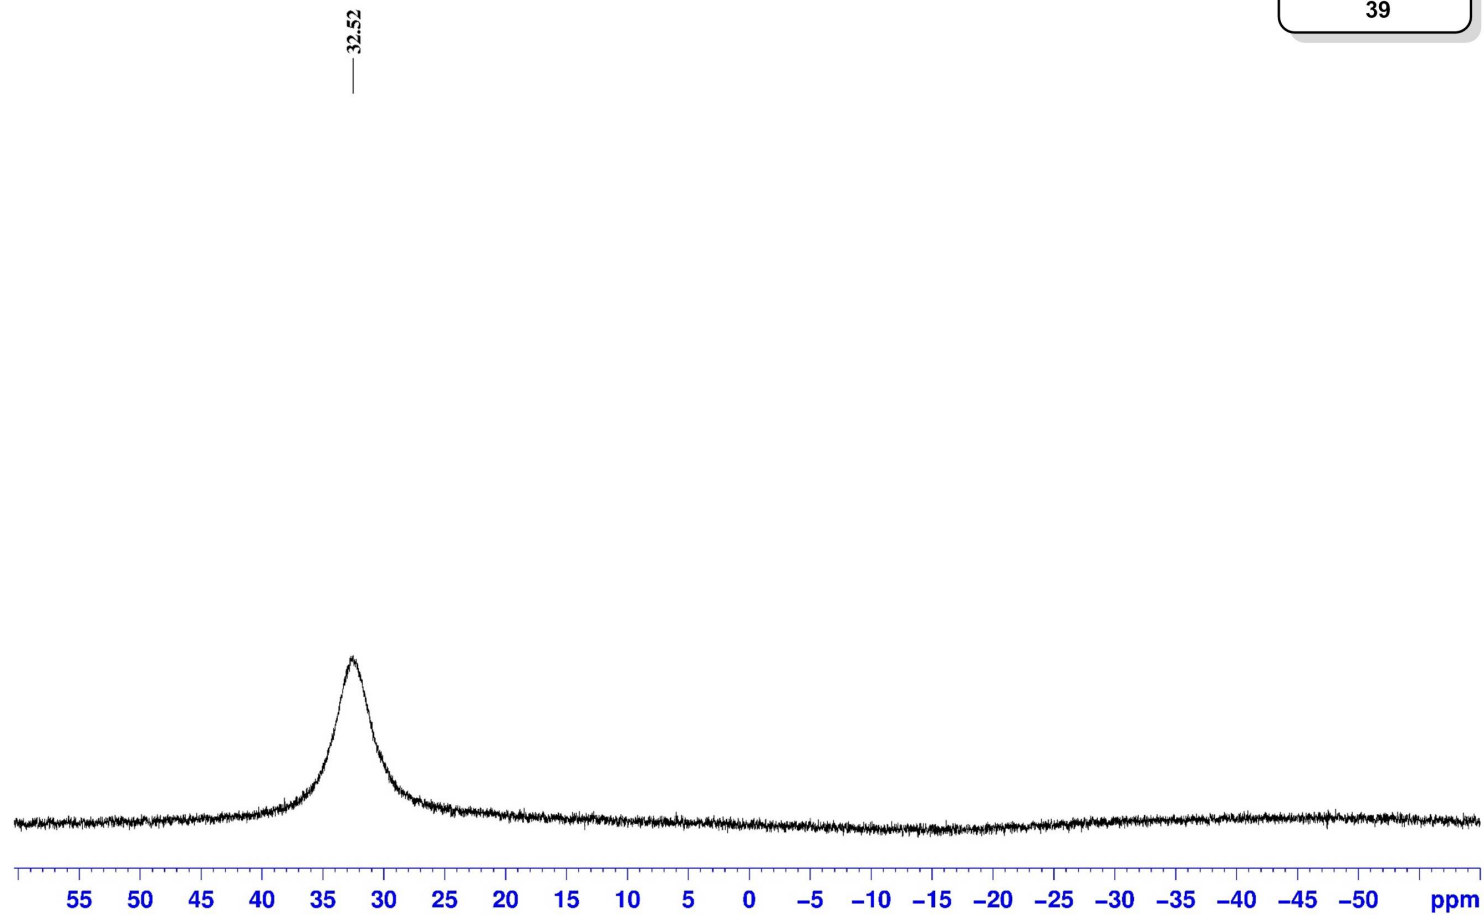

# <sup>1</sup>H NMR

3-methyl-3-(2-(4-(morpholinosulfonyl)phenyl)-2-(4,4,5,5-tetramethyl-1,3,2-dioxaborolan-2-yl)ethyl)cyclopentanone  
500 MHz, CDCl<sub>3</sub>

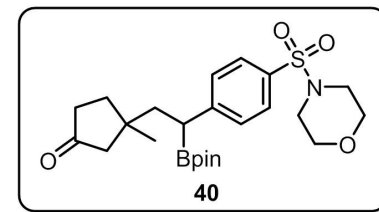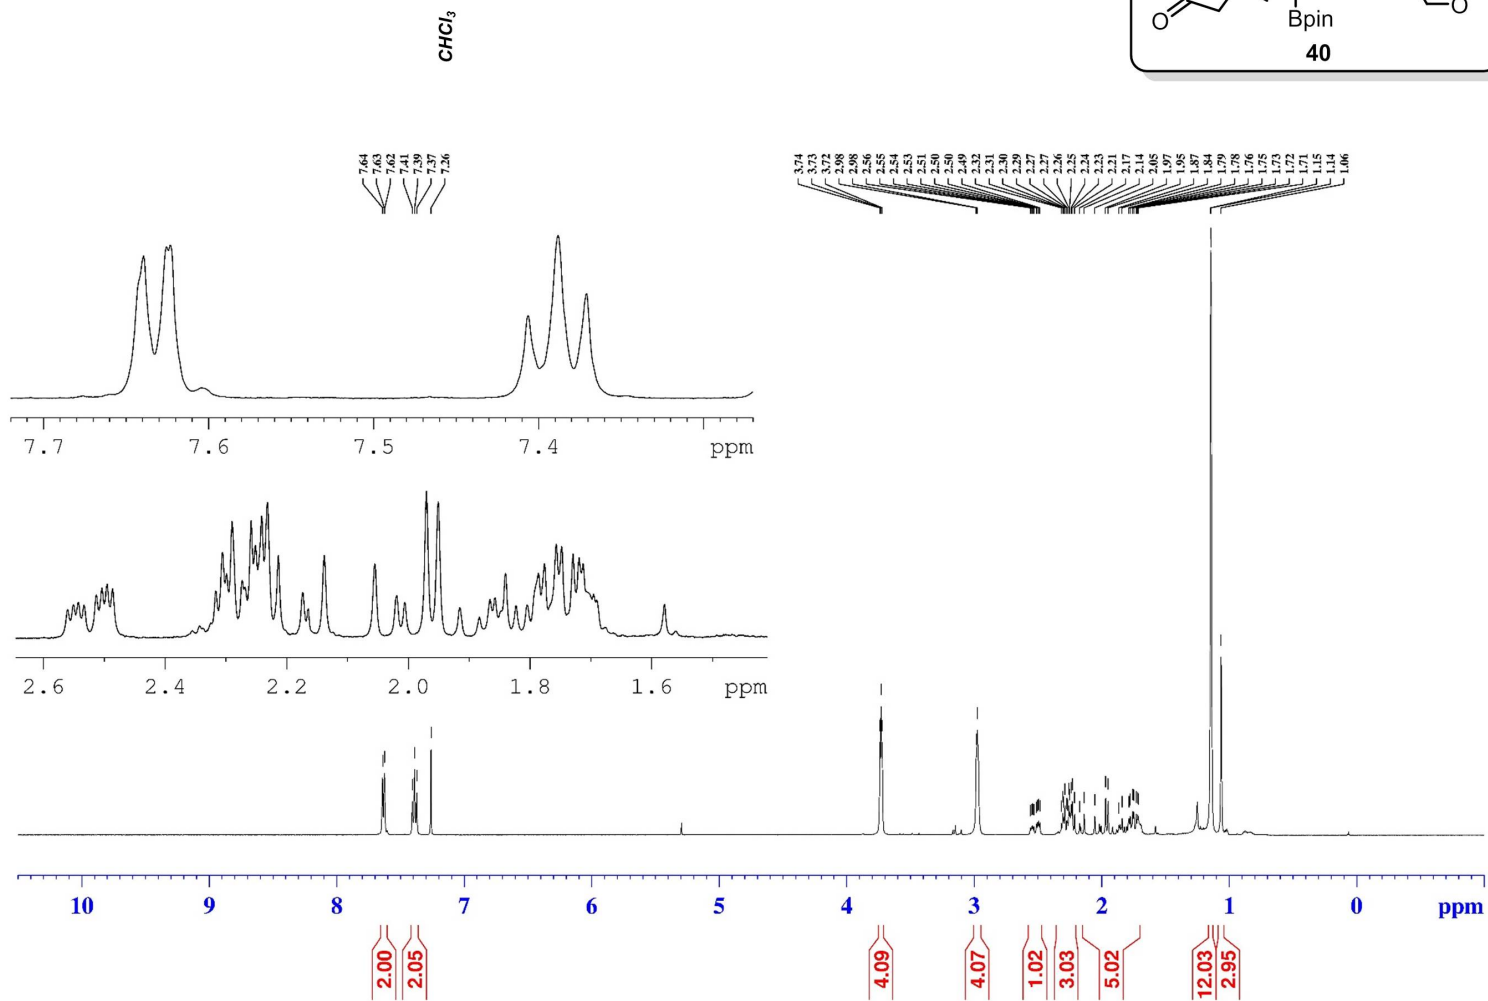

**<sup>13</sup>C NMR**

3-Methyl-3-(2-(4-(morpholinosulfonyl)phenyl)-2-(4,4,5,5-tetramethyl-1,3,2-dioxaborolan-2-yl)ethyl)cyclopentanone  
125 MHz, CDCl<sub>3</sub>

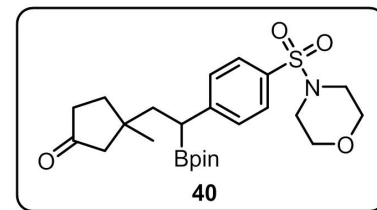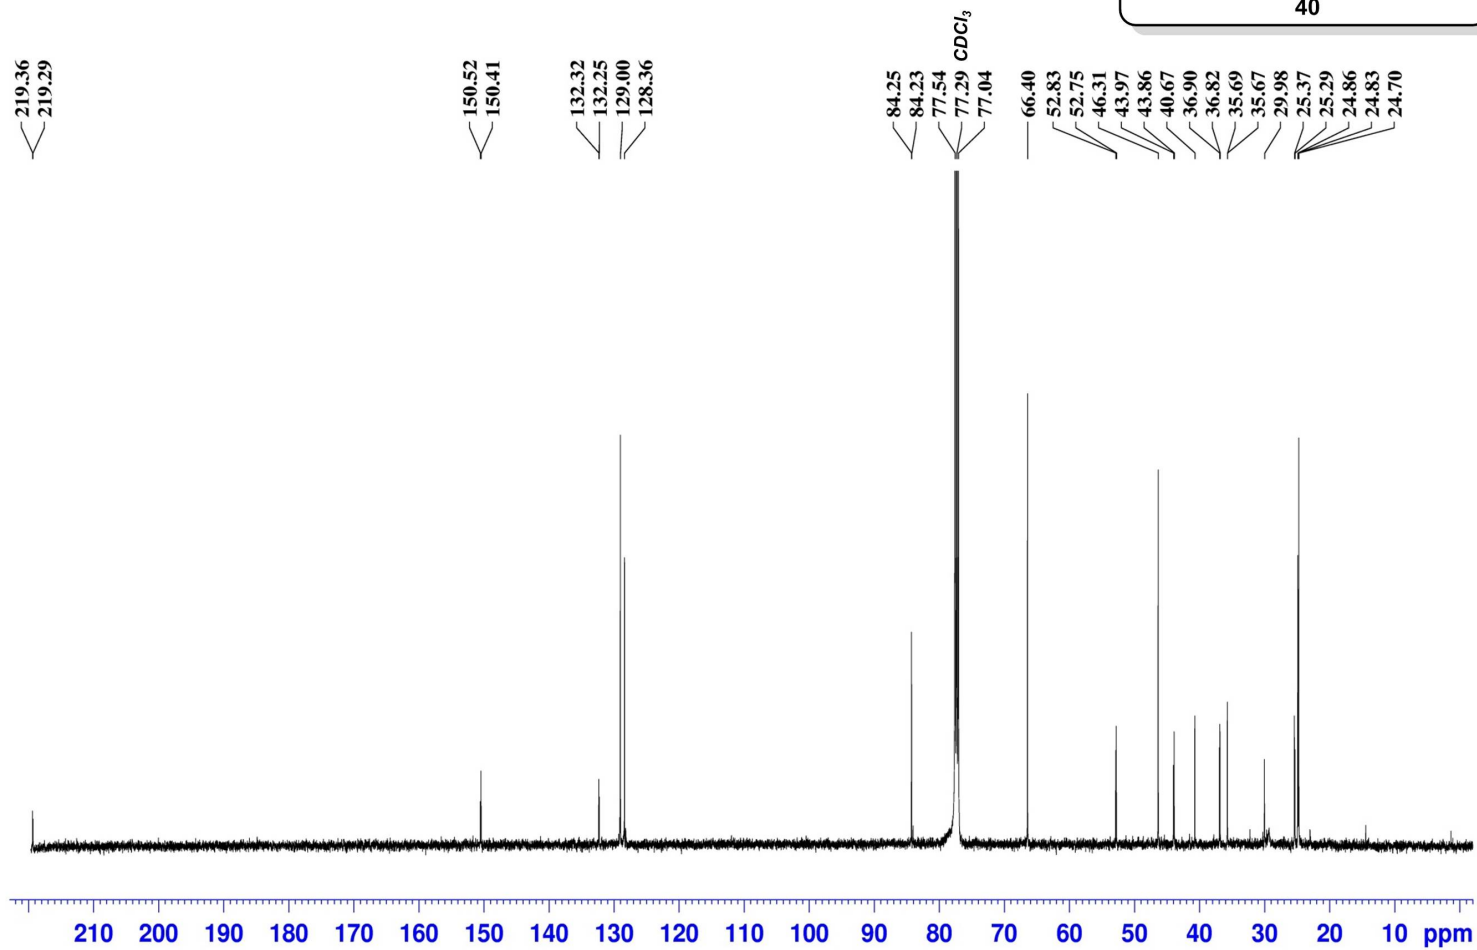

**<sup>11</sup>B NMR**

3-methyl-3-(2-(4-(morpholinosulfonyl)phenyl)-2-(4,4,5,5-tetramethyl-1,3,2-dioxaborolan-2-yl)ethyl)cyclopentanone  
128 MHz, CDCl<sub>3</sub>

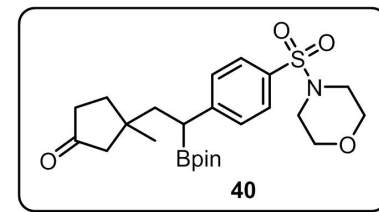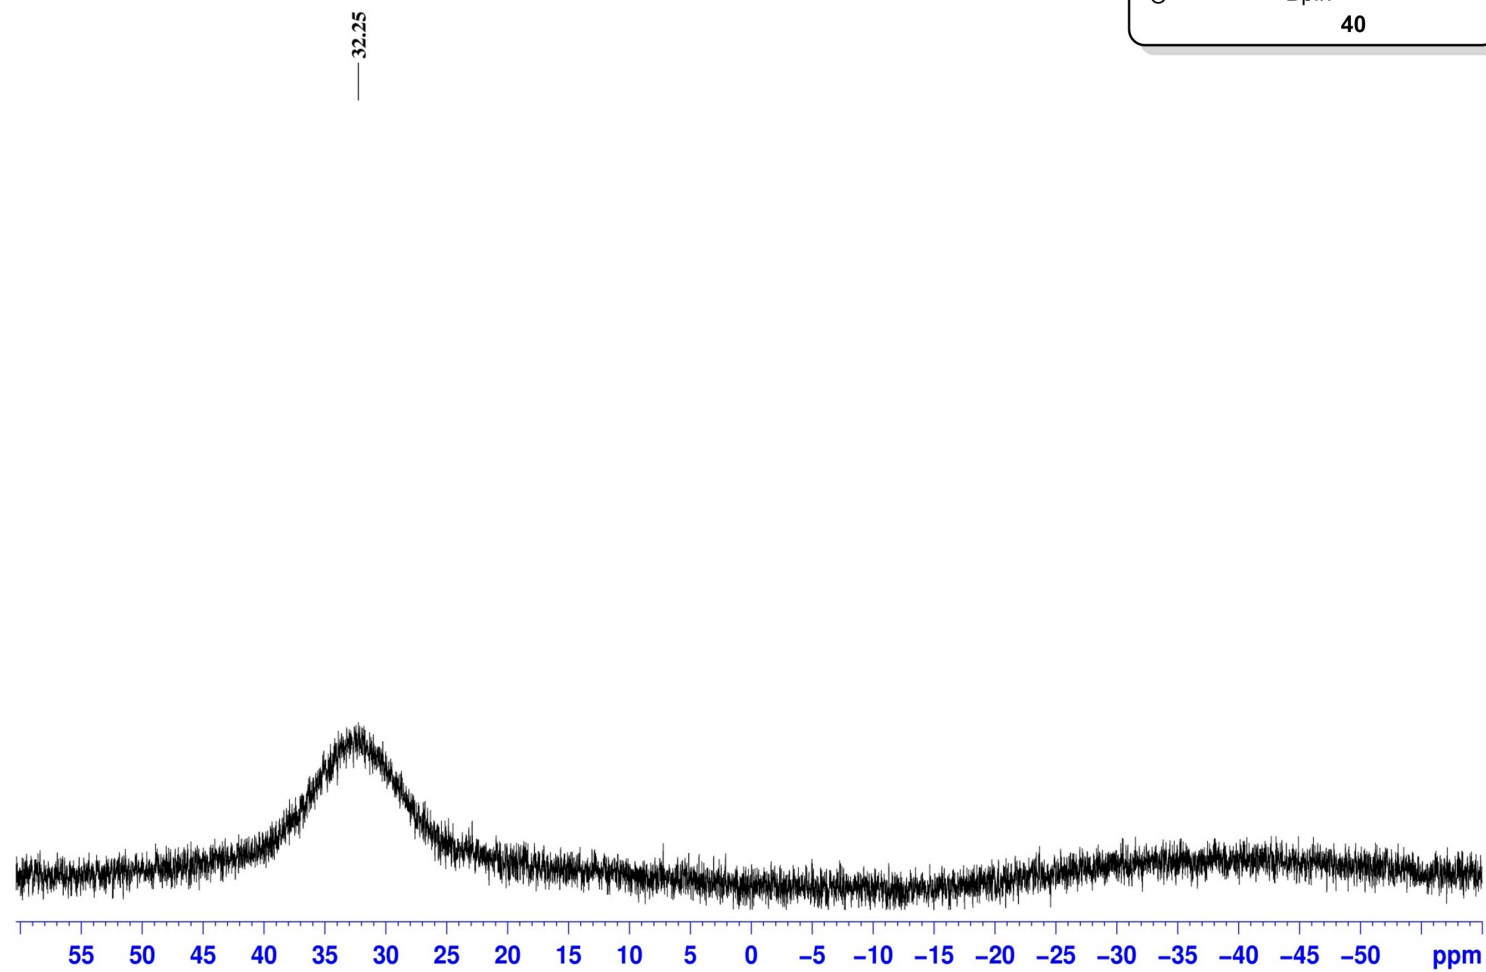

# <sup>1</sup>H NMR

1'-(2-(4-(morpholinosulfonyl)phenyl)-2-(4,4,5,5-tetramethyl-1,3,2-dioxaborolan-2-yl)ethyl)-[1,1'-bi(cyclopentane)]-2-one  
500 MHz, CDCl<sub>3</sub>

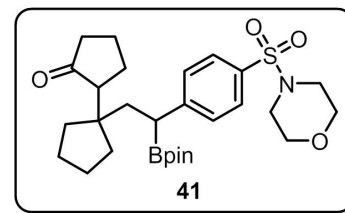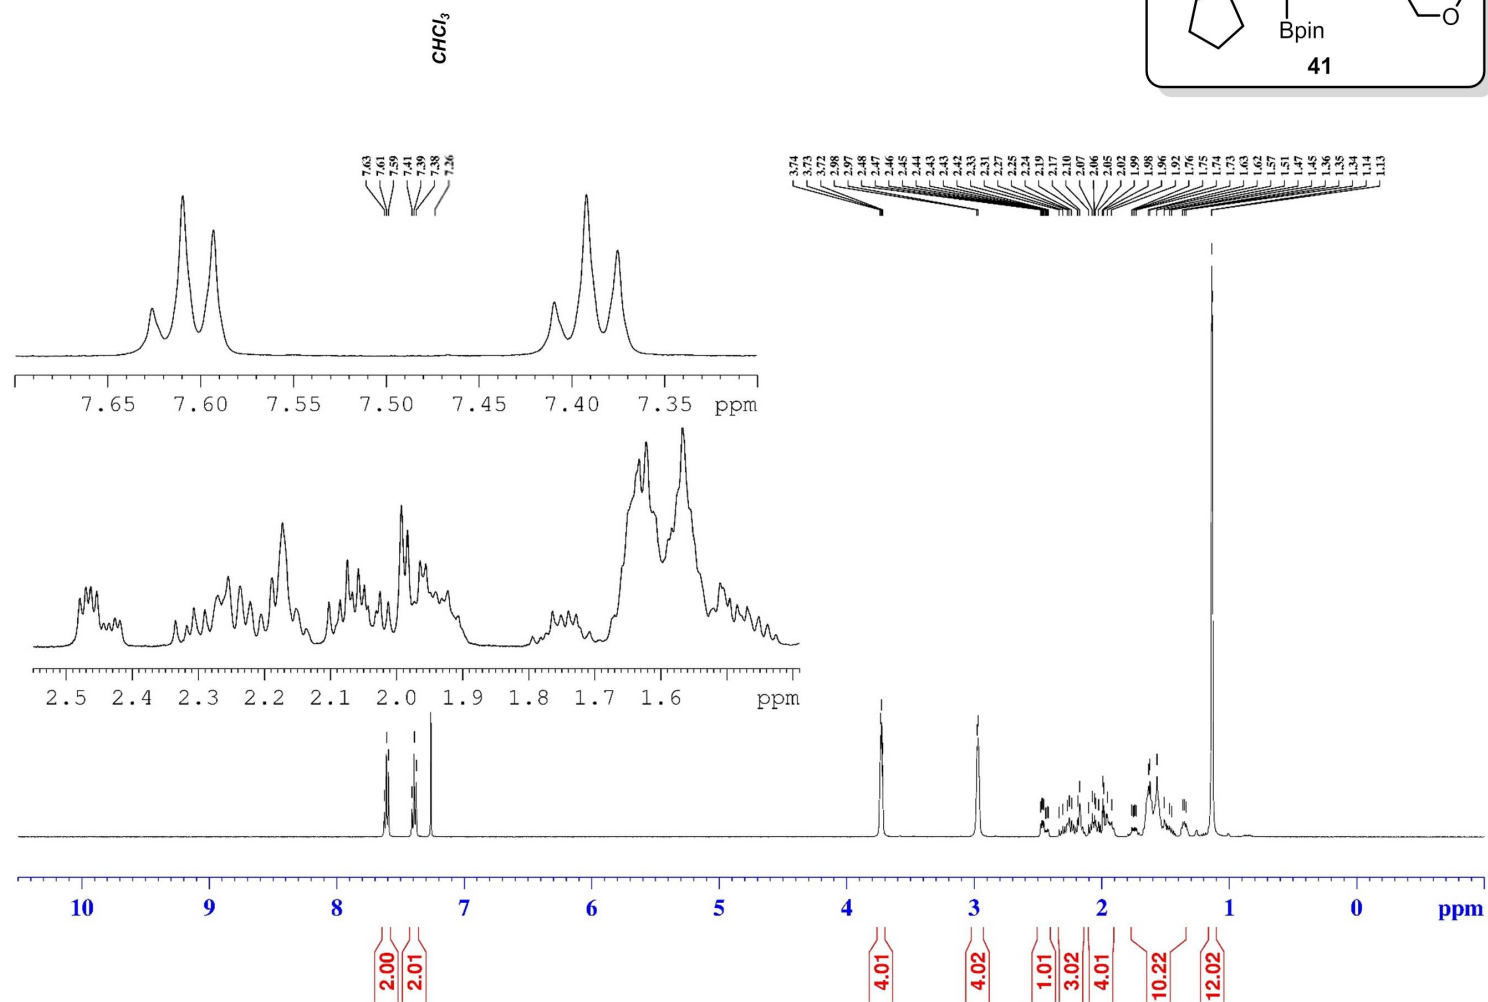

**<sup>13</sup>C NMR**

1'-(2-(4-(Morpholinofonyl)phenyl)-2-(4,4,5,5-tetramethyl-1,3,2-dioxaborolan-2-yl)ethyl)-[1,1'-bi(cyclopentan)]-2-one  
125 MHz, CDCl<sub>3</sub>

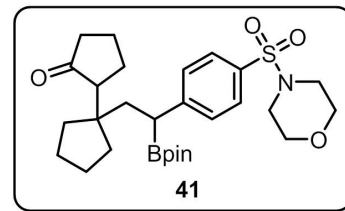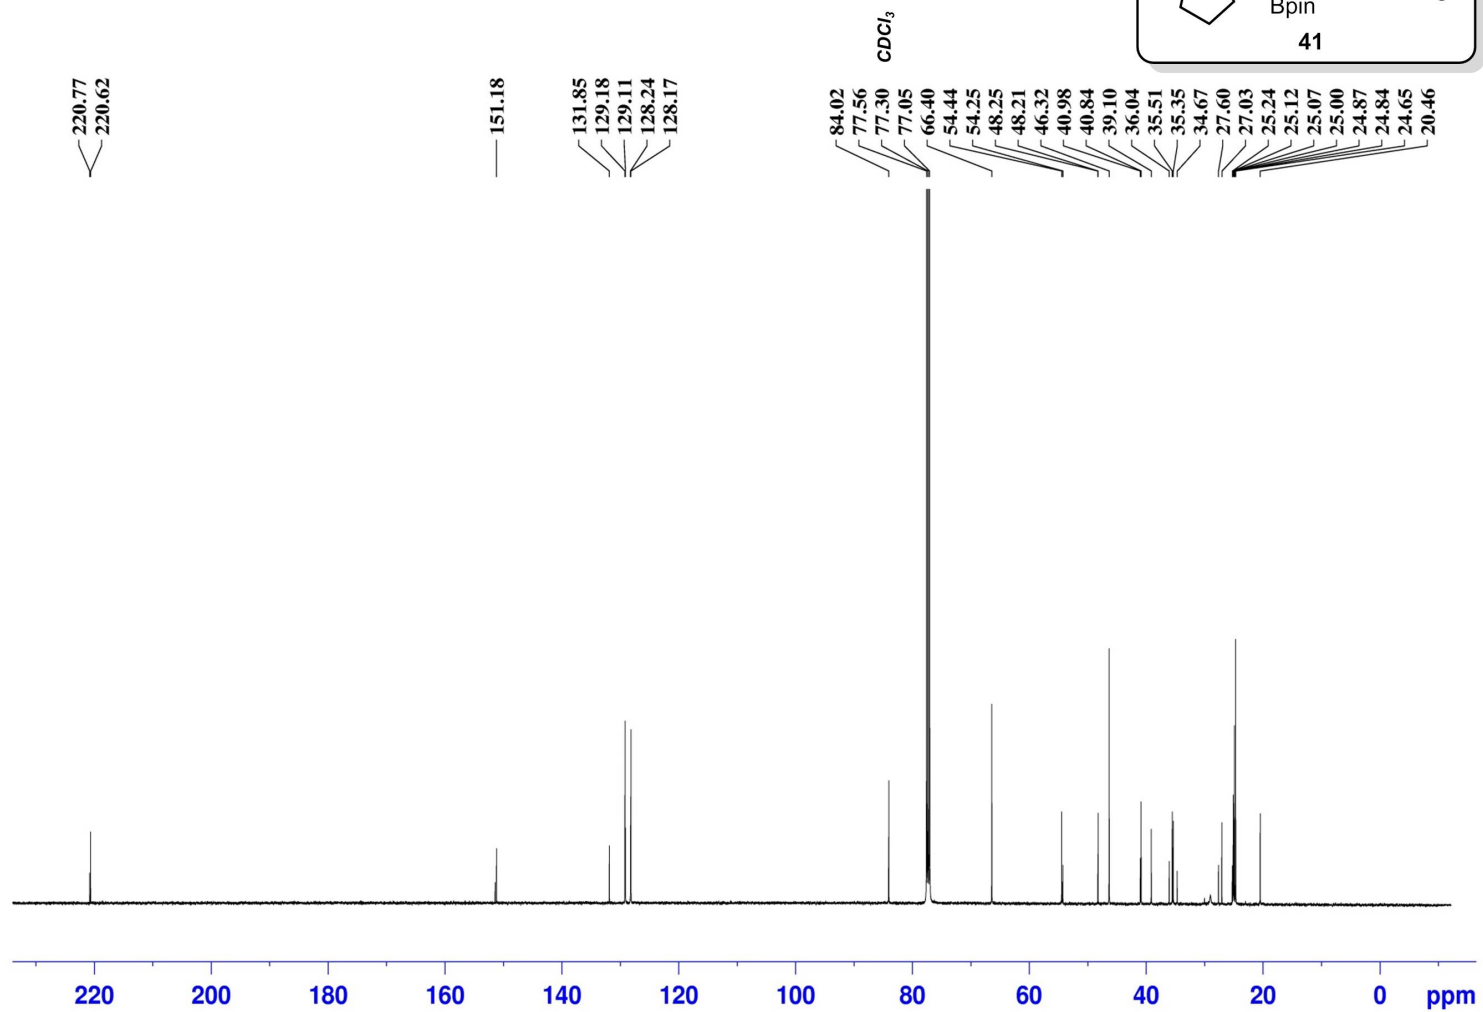

**<sup>11</sup>B NMR**

1'-(2-(4-(morpholinylsulfonyl)phenyl)-2-(4,4,5,5-tetramethyl-1,3,2-dioxaborolan-2-yl)ethyl)-[1,1'-bi(cyclopentan)]-2-one  
128 MHz, CDCl<sub>3</sub>

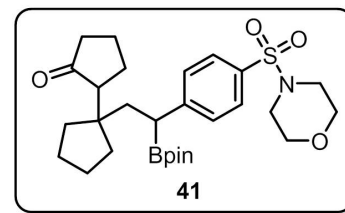

33.22

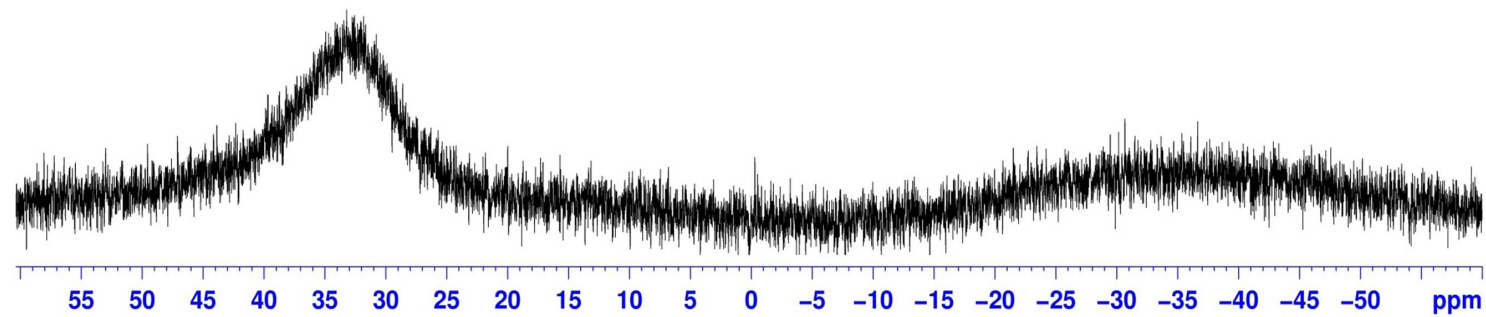





**<sup>13</sup>C NMR**

3,5-Dimethyl-3-(2-(4-(morpholinofonyl)phenyl)-2-(4,4,5,5-tetramethyl-1,3,2-dioxaborolan-2-yl)ethyl)cyclohexanone  
125 MHz, CDCl<sub>3</sub>

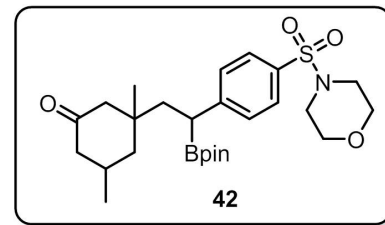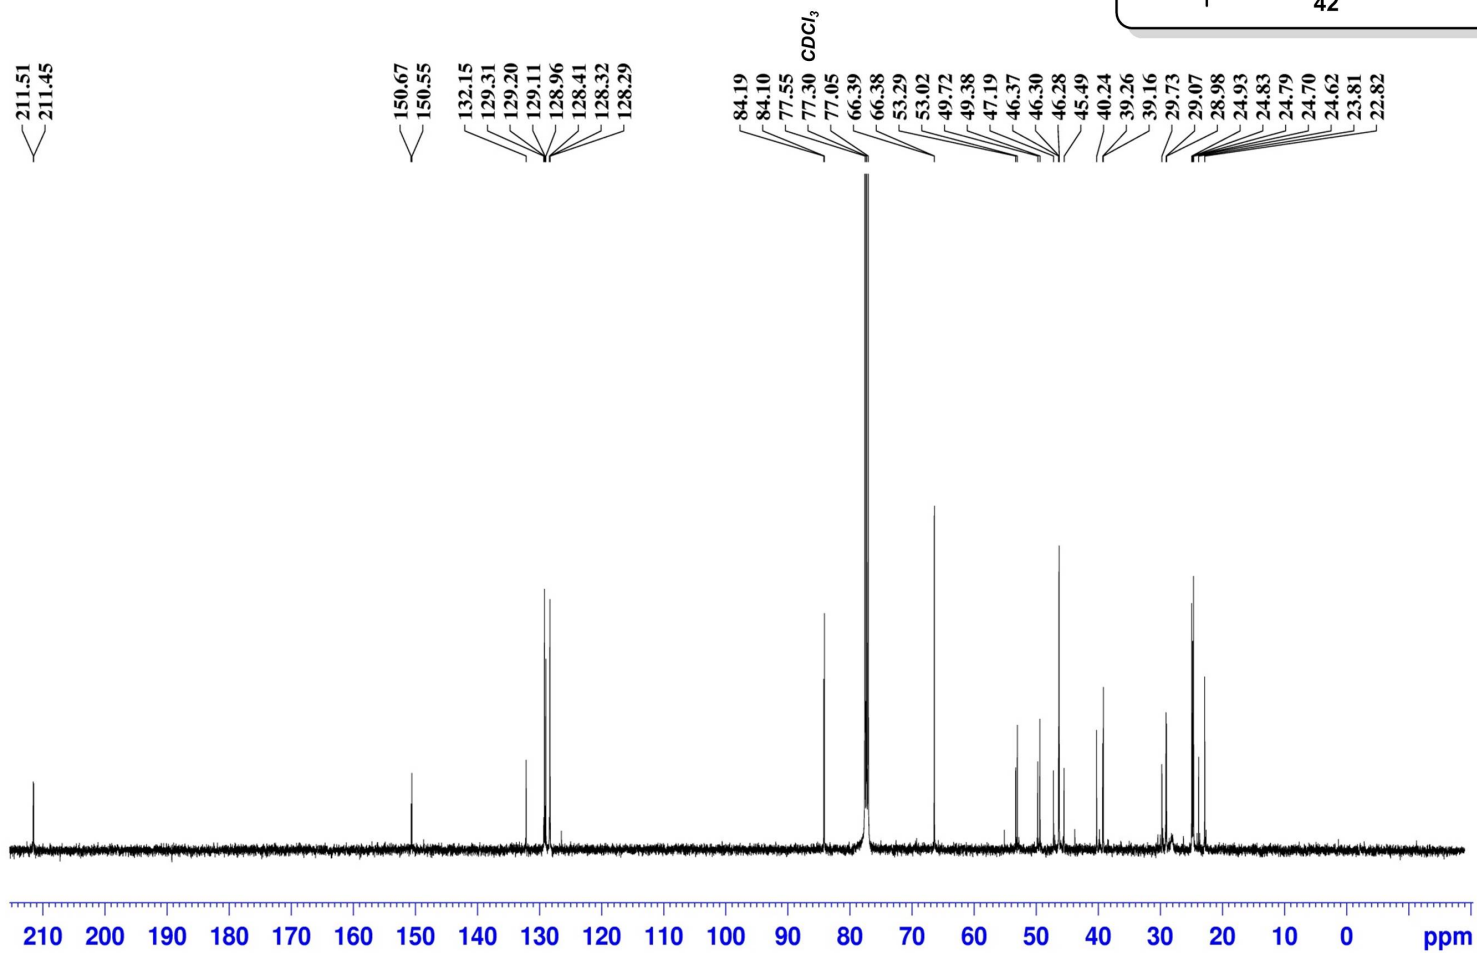

**<sup>11</sup>B NMR**

3,5-dimethyl-3-(2-(4-(morpholinylsulfonyl)phenyl)-2-(4,4,5,5-tetramethyl-1,3,2-dioxaborolan-2-yl)ethyl)cyclohexanone  
128 MHz, CDCl<sub>3</sub>

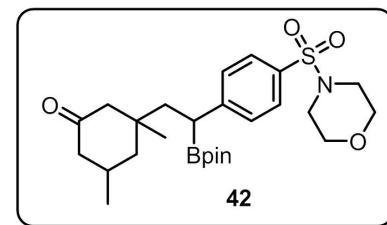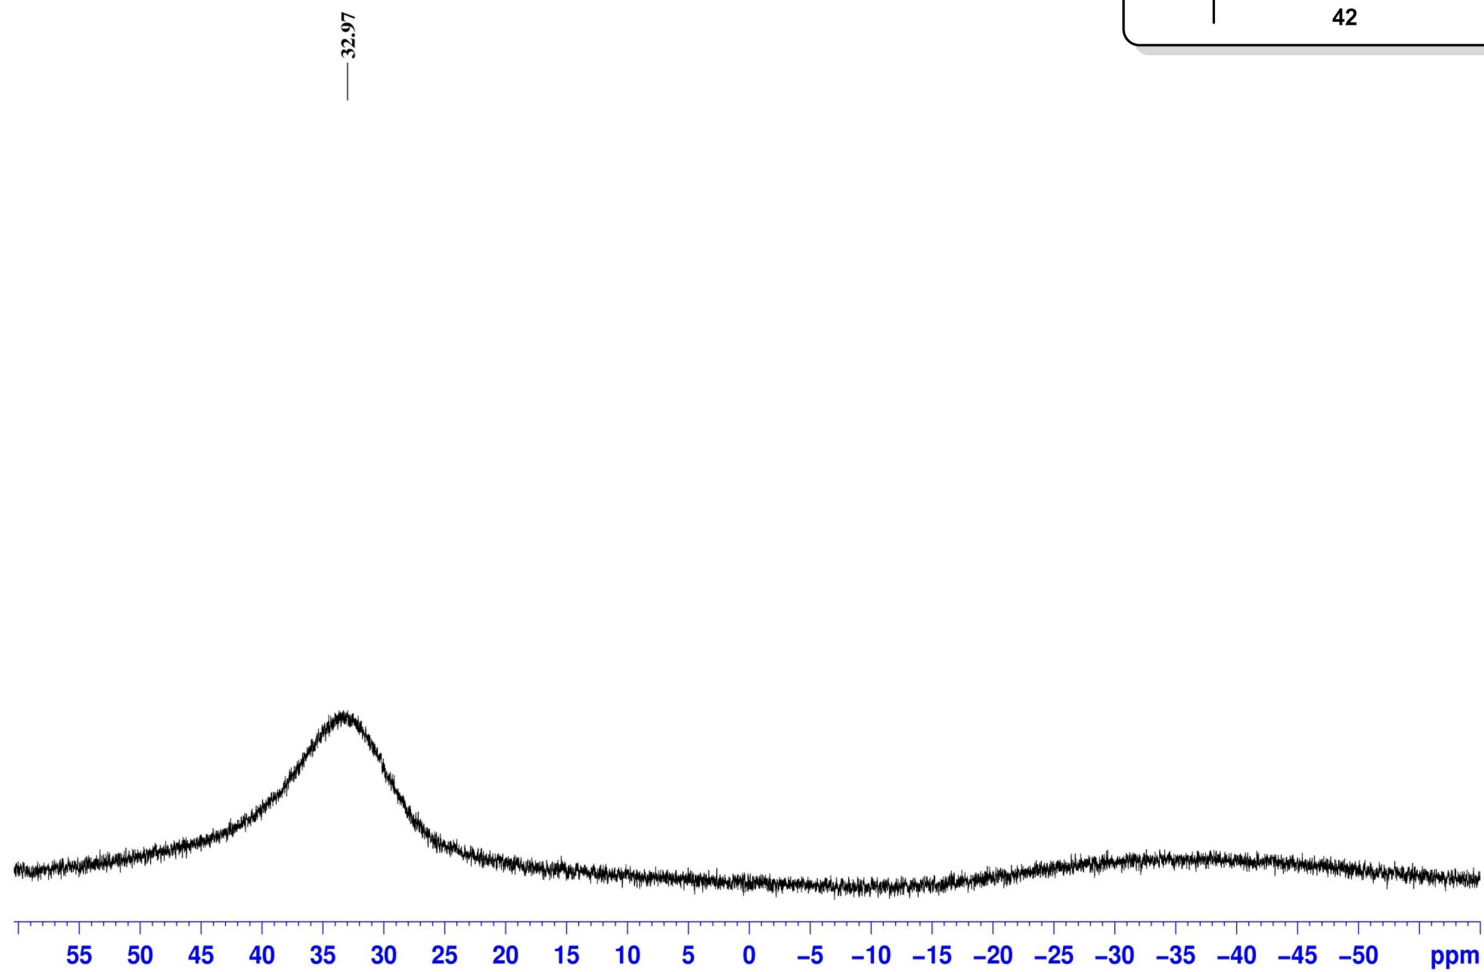

S275

# <sup>1</sup>H NMR

4-((4-(2-((3*r*,5*r*,7*r*)-adamantan-1-yl)-1-(4,4,5,5-tetramethyl-1,3,2-dioxaborolan-2-yl)ethyl)phenyl)sulfonyl)morpholine  
500 MHz, CDCl<sub>3</sub>

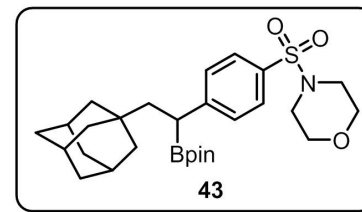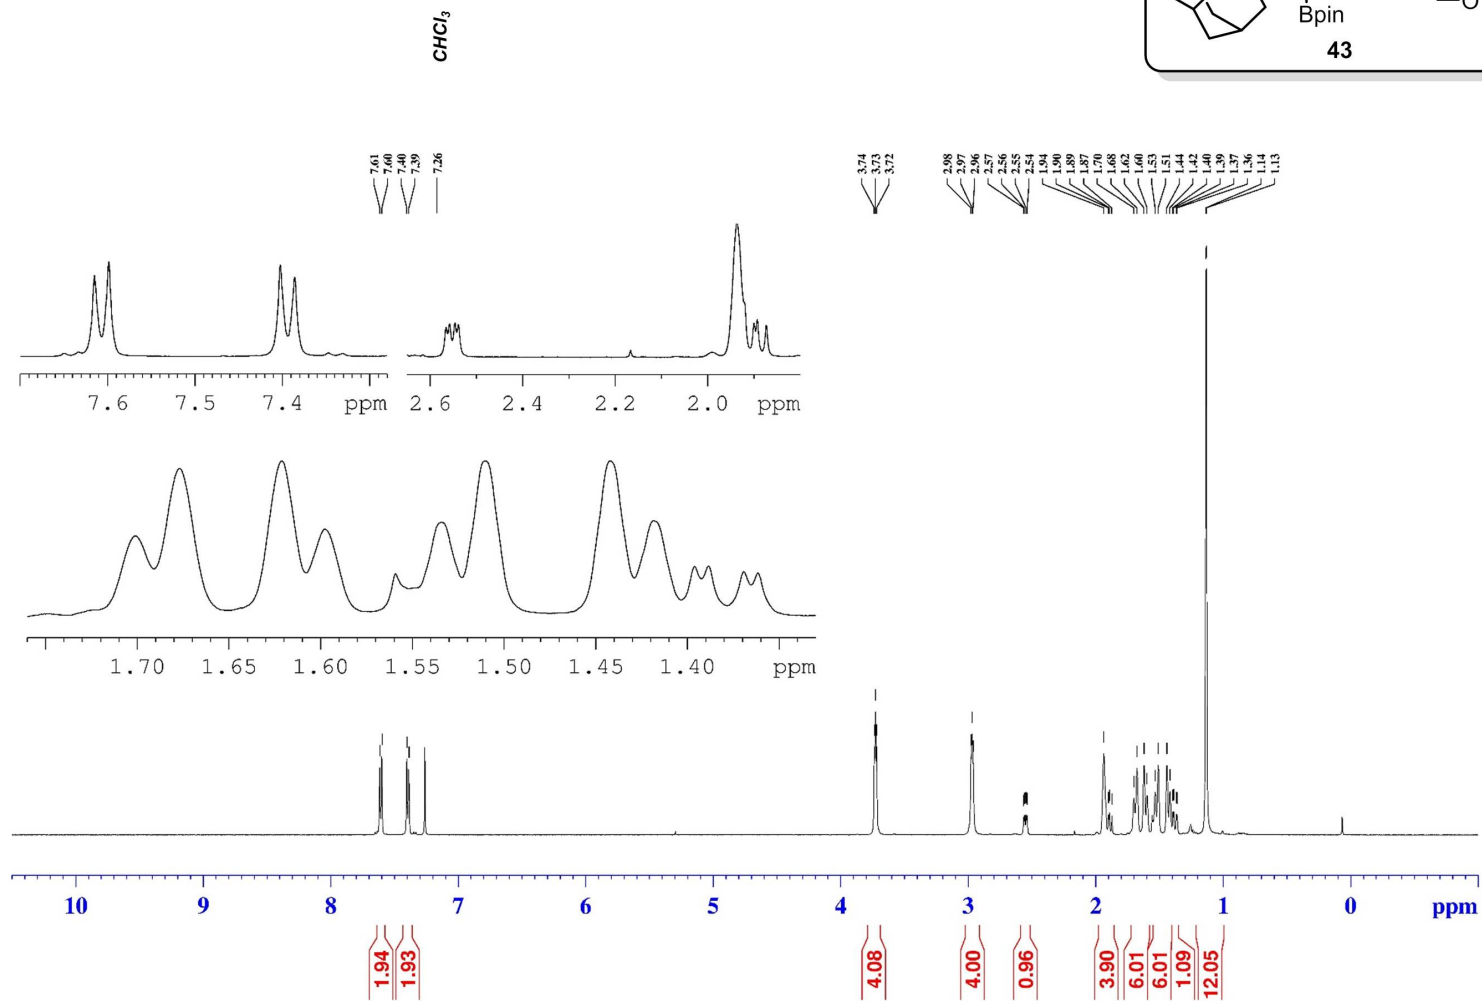

**<sup>13</sup>C NMR**

4-((4-(2-Adamantan-1-yl)-1-(4,4,5,5-tetramethyl-1,3,2-dioxaborolan-2-yl)ethyl)phenyl)sulfonylmorpholine  
125 MHz, CDCl<sub>3</sub>

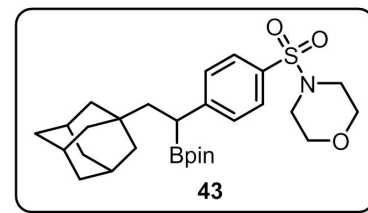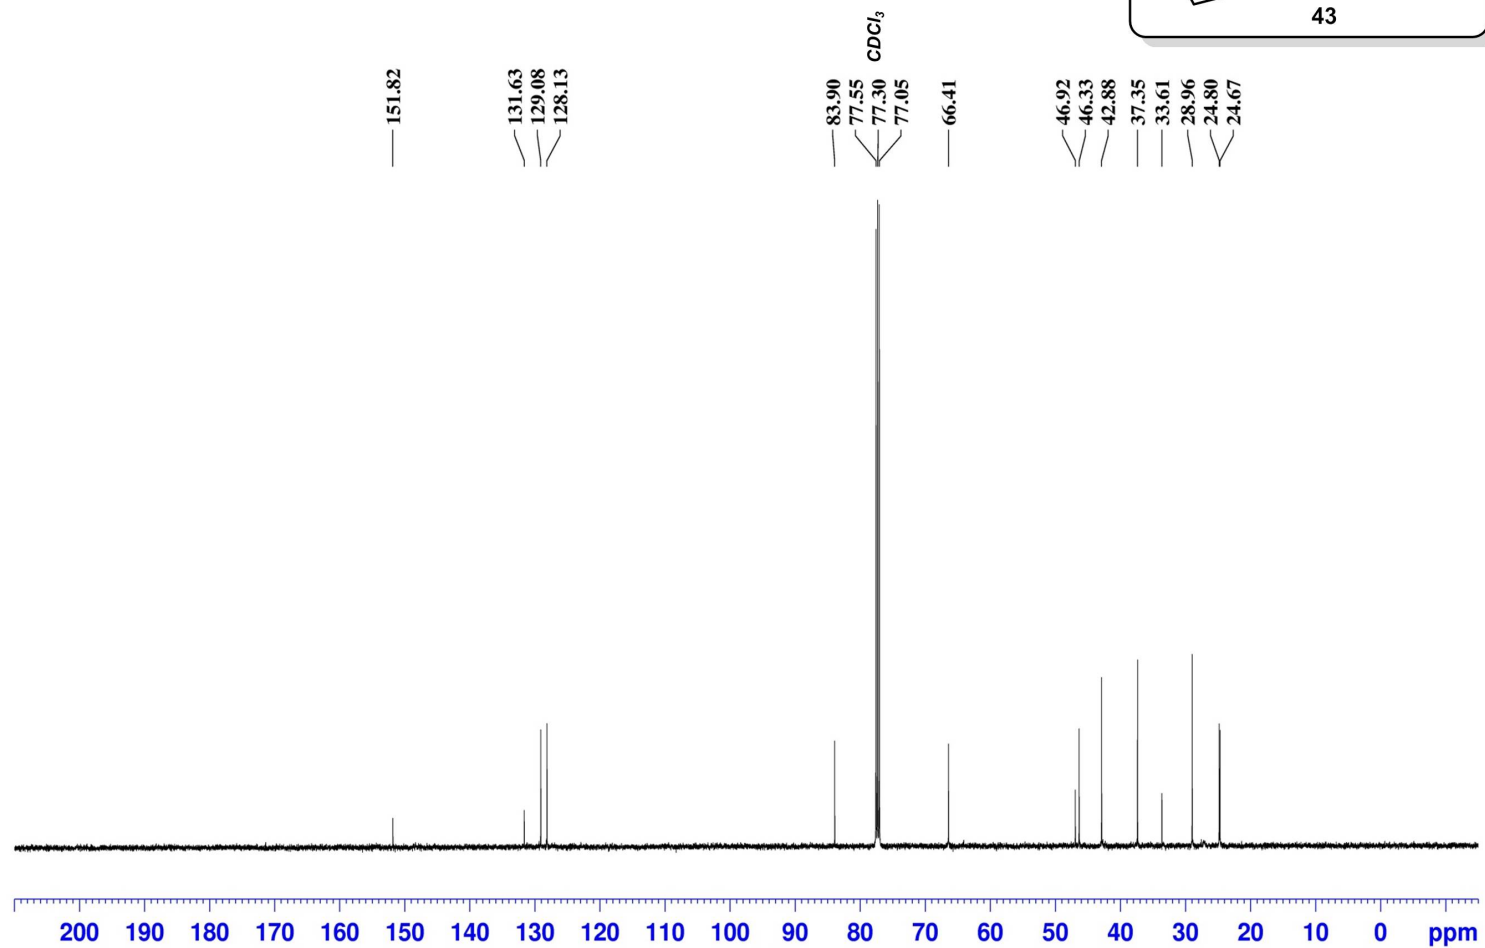

**<sup>11</sup>B NMR**

4-((4-(2-((3*r*,5*r*,7*r*)-adamantan-1-yl)-1-(4,4,5,5-tetramethyl-1,3,2-dioxaborolan-2-yl)ethyl)phenyl)sulfonyl)morpholine  
128 MHz, CDCl<sub>3</sub>

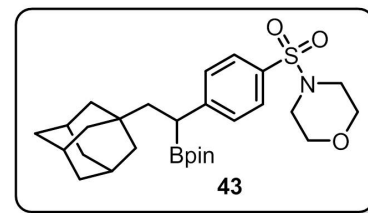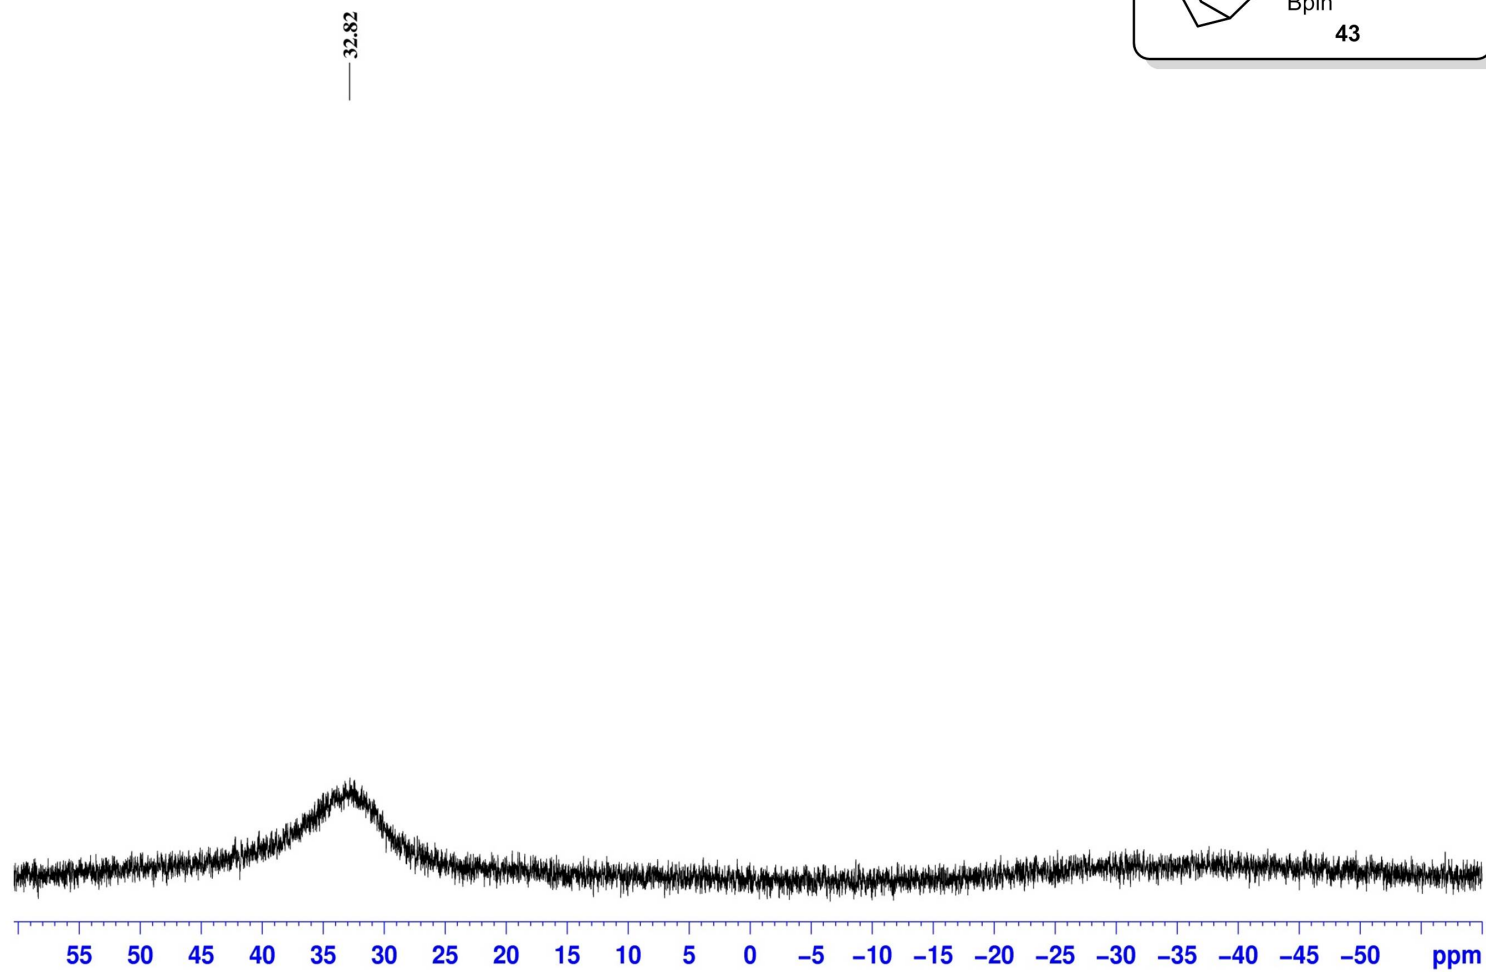

# <sup>1</sup>H NMR

4-((4-(2-(4-pentylbicyclo[2.2.2]octan-1-yl)-1-(4,4,5,5-tetramethyl-1,3,2-dioxaborolan-2-yl)ethyl)phenyl)sulfonyl)morpholine  
500 MHz, CDCl<sub>3</sub>

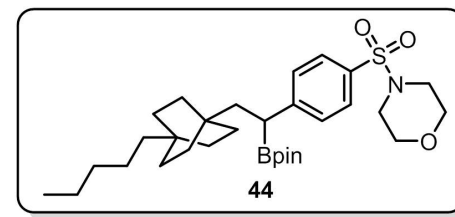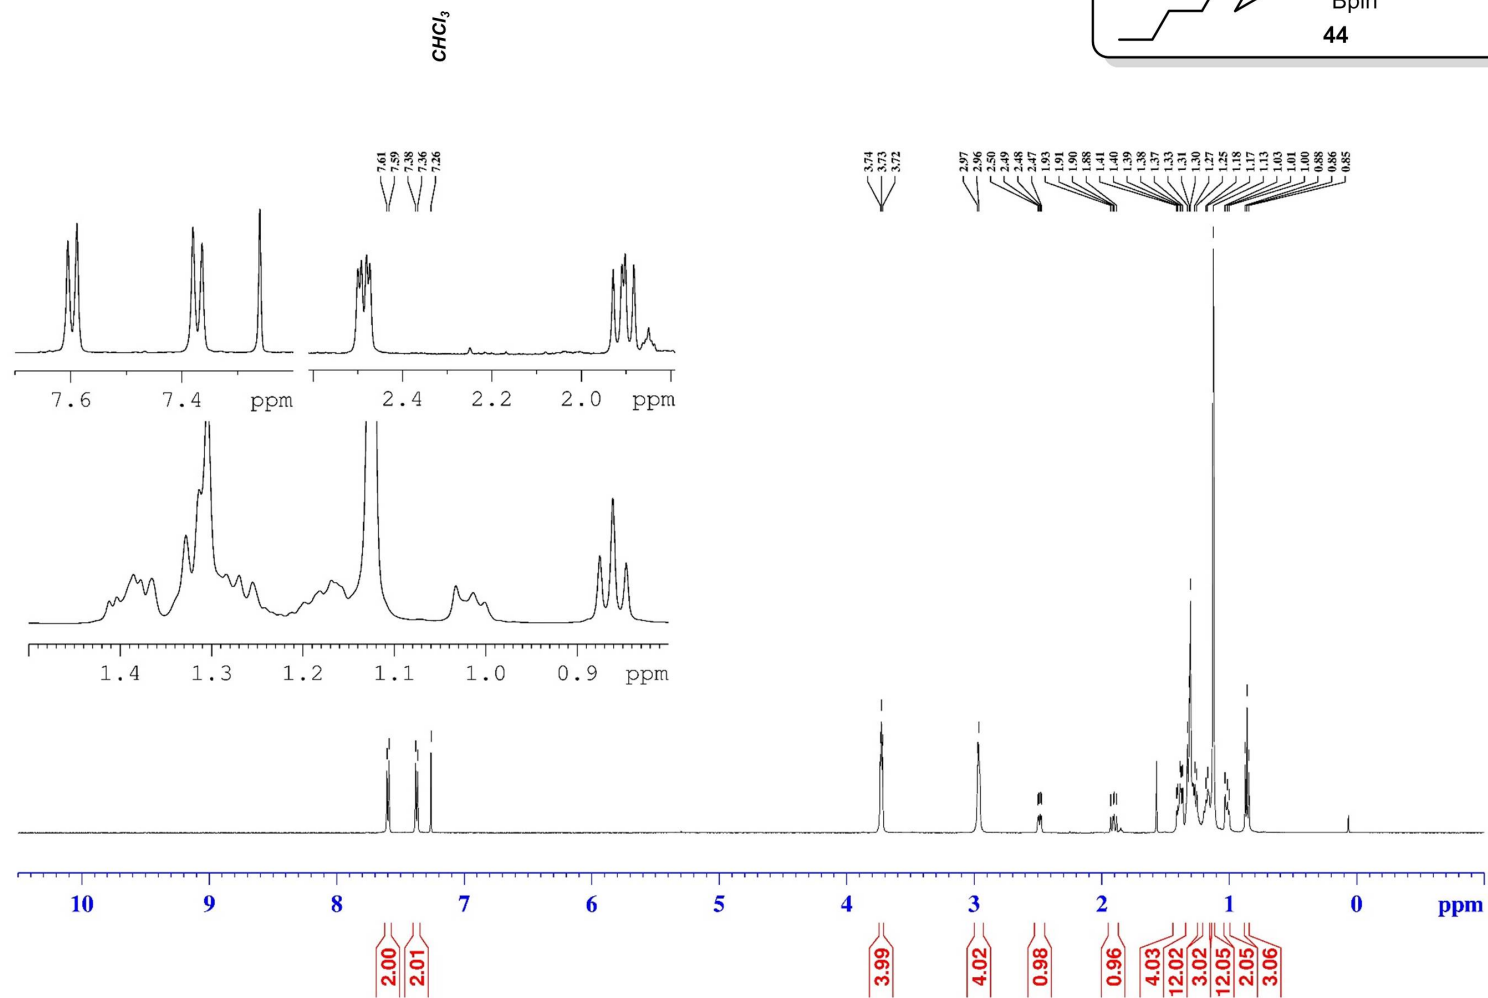

**<sup>13</sup>C NMR**

4-((4-(2-(4-Pentylbicyclo[2.2.2]octan-1-yl)-1-(4,4,5,5-tetramethyl-1,3,2-dioxaborolan-2-yl)ethyl)phenyl)sulfonyl)morpholine  
125 MHz, CDCl<sub>3</sub>

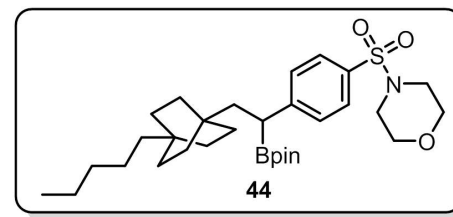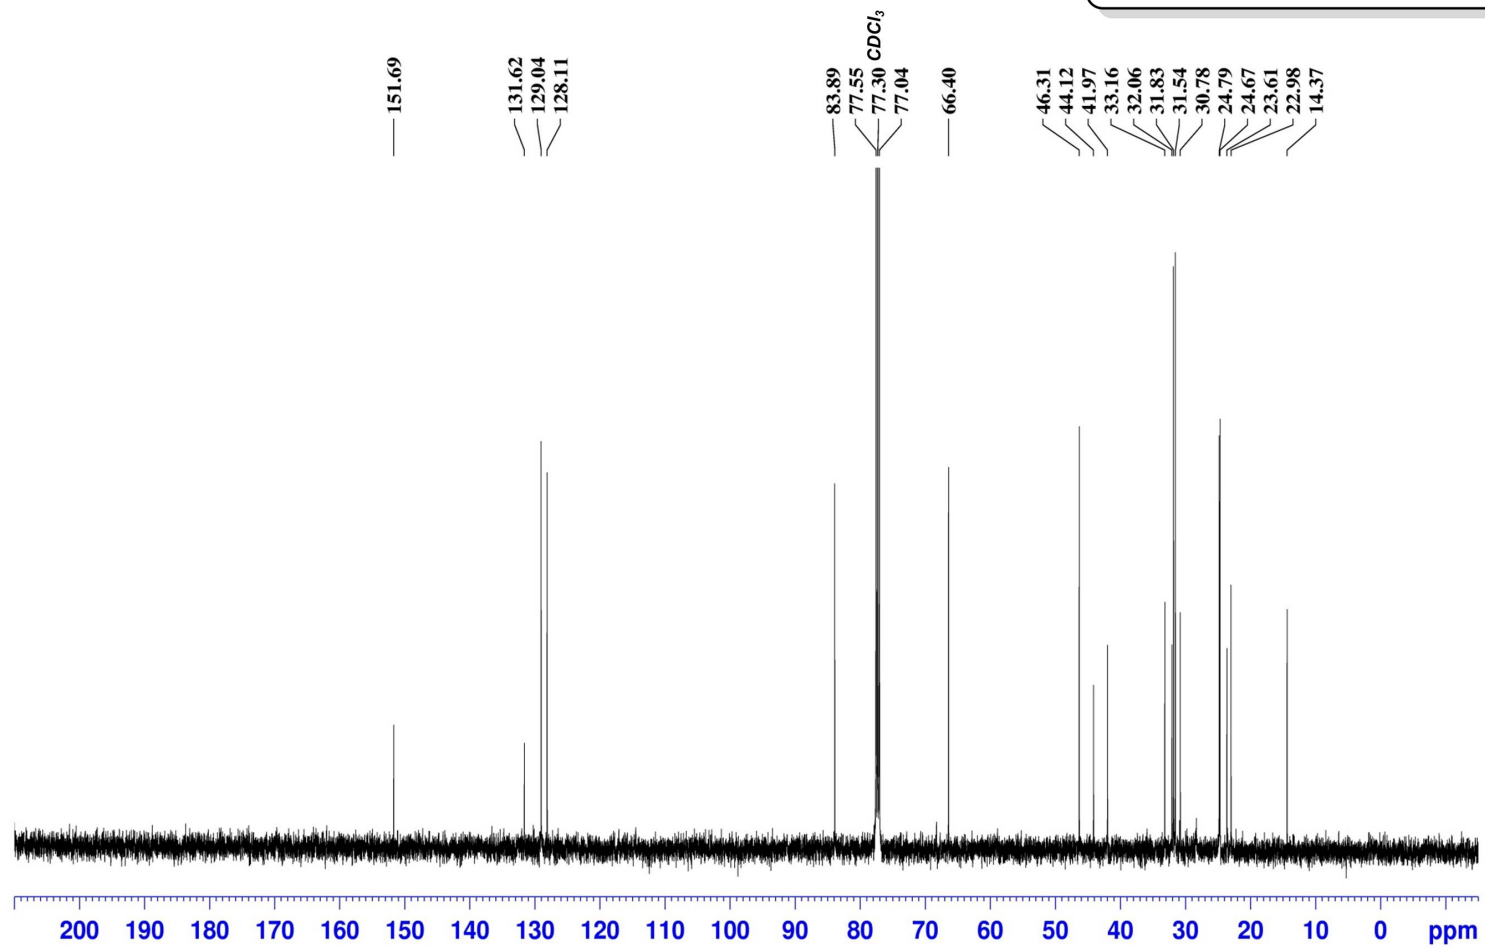



**<sup>11</sup>B NMR**

4-((4-(2-(4-pentylbicyclo[2.2.2]octan-1-yl)-1-(4,4,5,5-tetramethyl-1,3,2-dioxaborolan-2-yl)ethyl)phenyl)sulfonyl)morpholine  
128 MHz, CDCl<sub>3</sub>

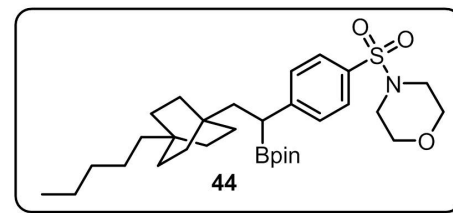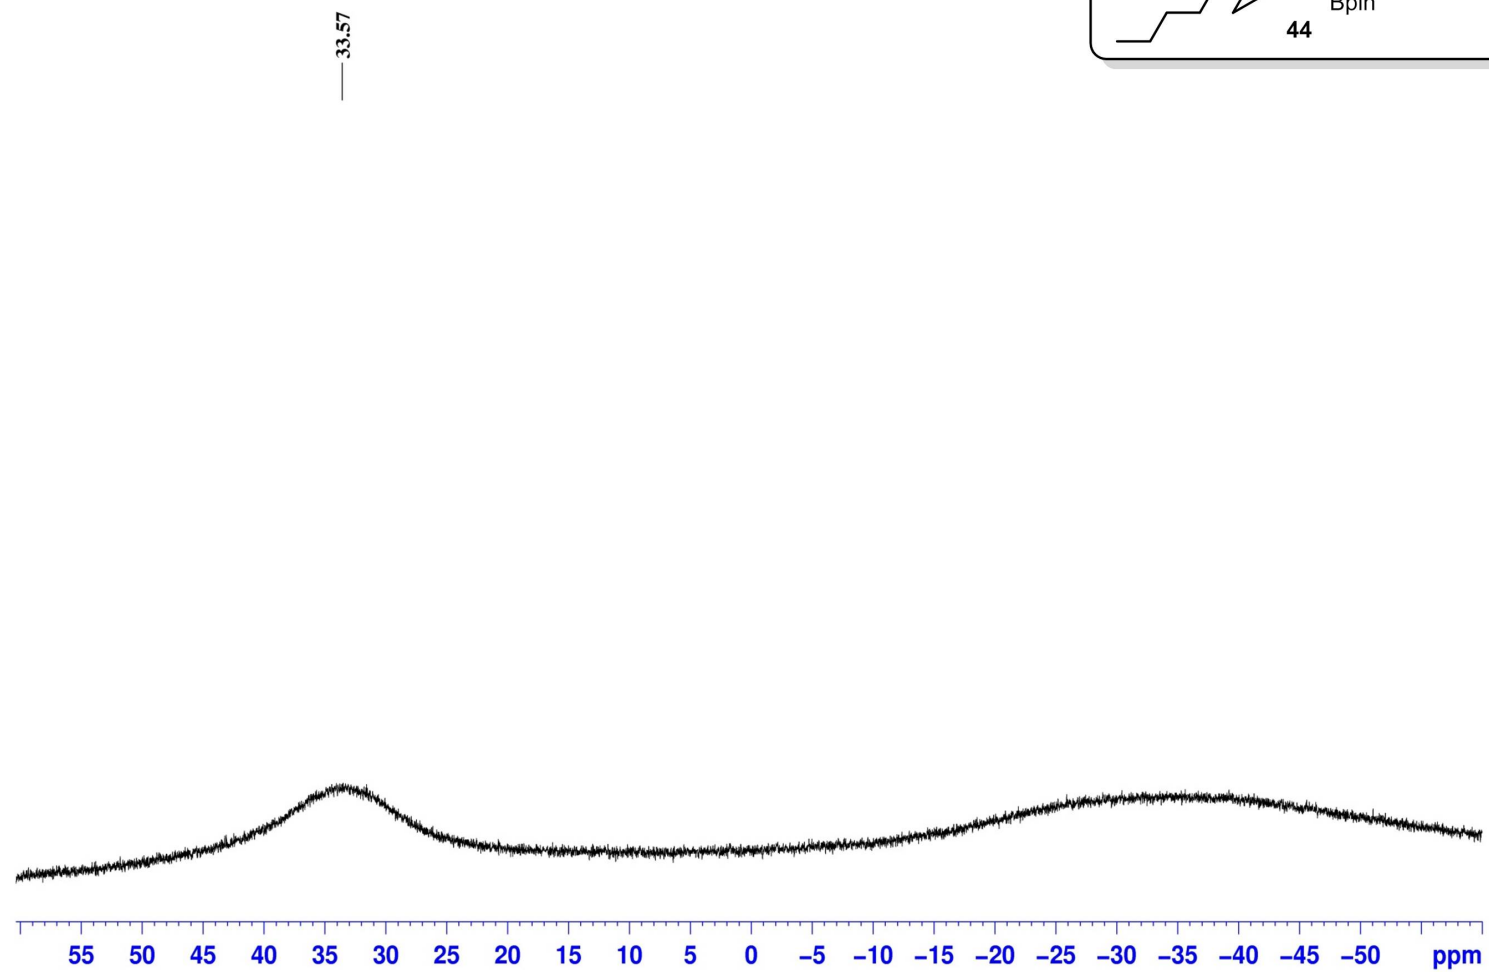

# <sup>1</sup>H NMR

4-((4-(2-(1-methylcyclohexyl)-1-(4,4,5,5-tetramethyl-1,3,2-dioxaborolan-2-yl)ethyl)phenyl)sulfonyl)morpholine  
500 MHz, CDCl<sub>3</sub>

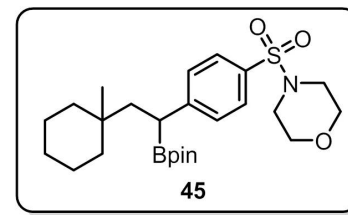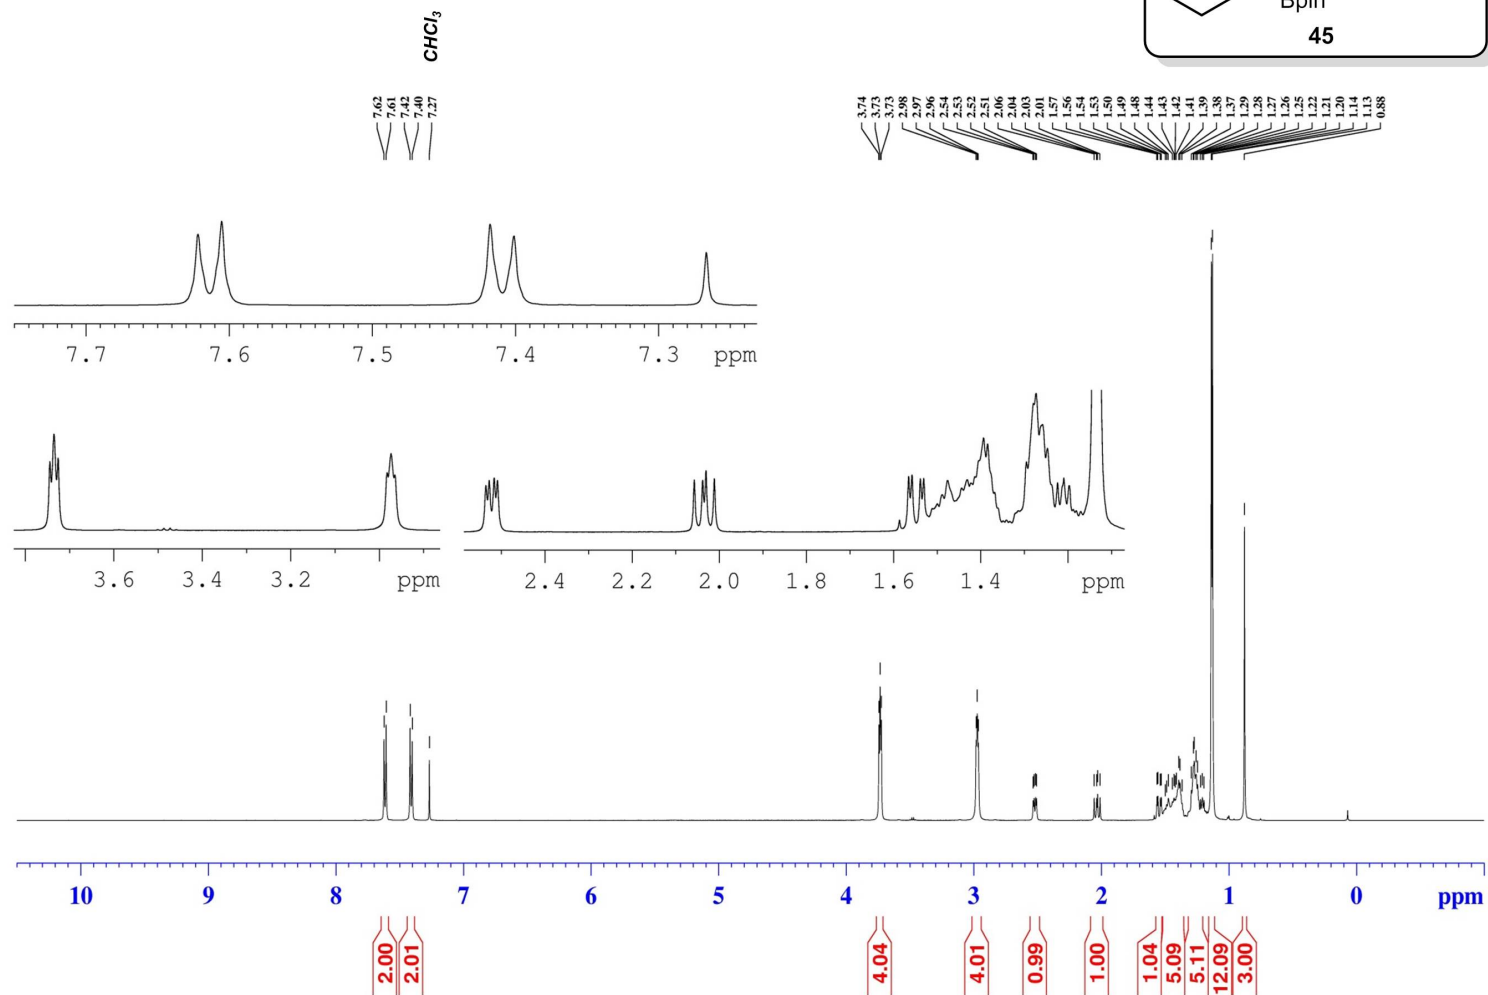

**<sup>13</sup>C NMR**

4-((4-(2-(1-Methylcyclohexyl)-1-(4,4,5,5-tetramethyl-1,3,2-dioxaborolan-2-yl)ethyl)phenyl)sulfonyl)morpholine  
125 MHz, CDCl<sub>3</sub>

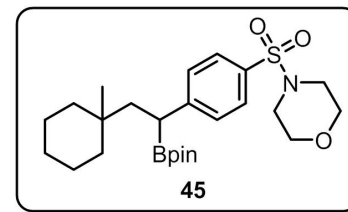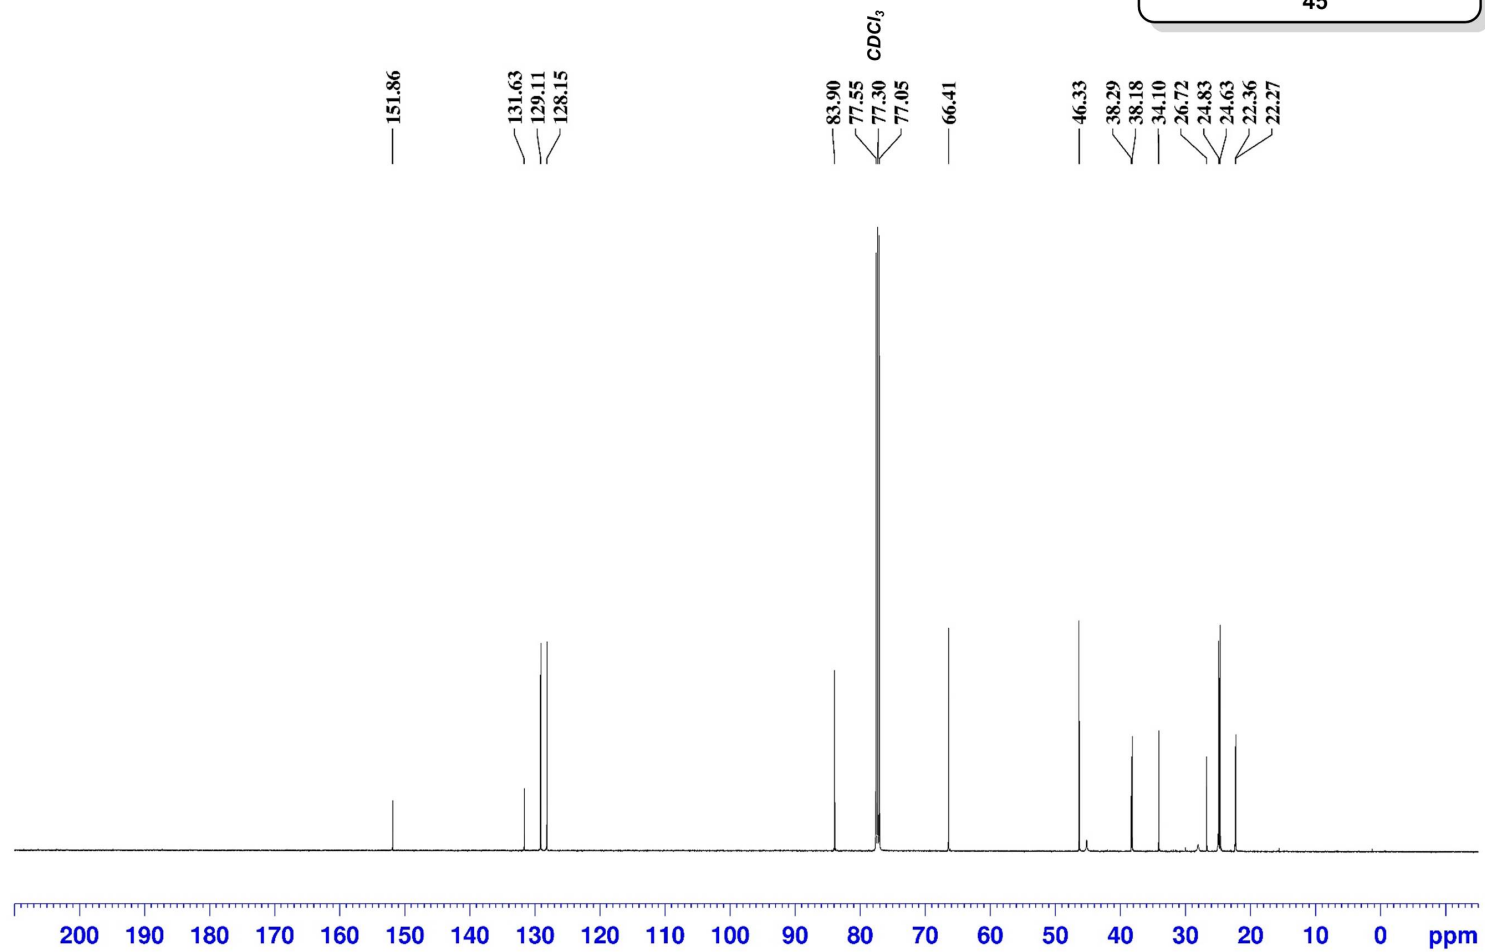

**<sup>11</sup>B NMR**

4-((4-(2-(1-methylcyclohexyl)-1-(4,4,5,5-tetramethyl-1,3,2-dioxaborolan-2-yl)ethyl)phenyl)sulfonyl)morpholine  
128 MHz, CDCl<sub>3</sub>

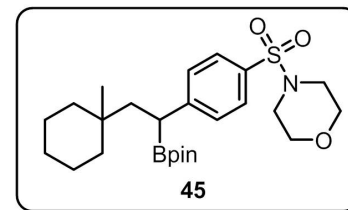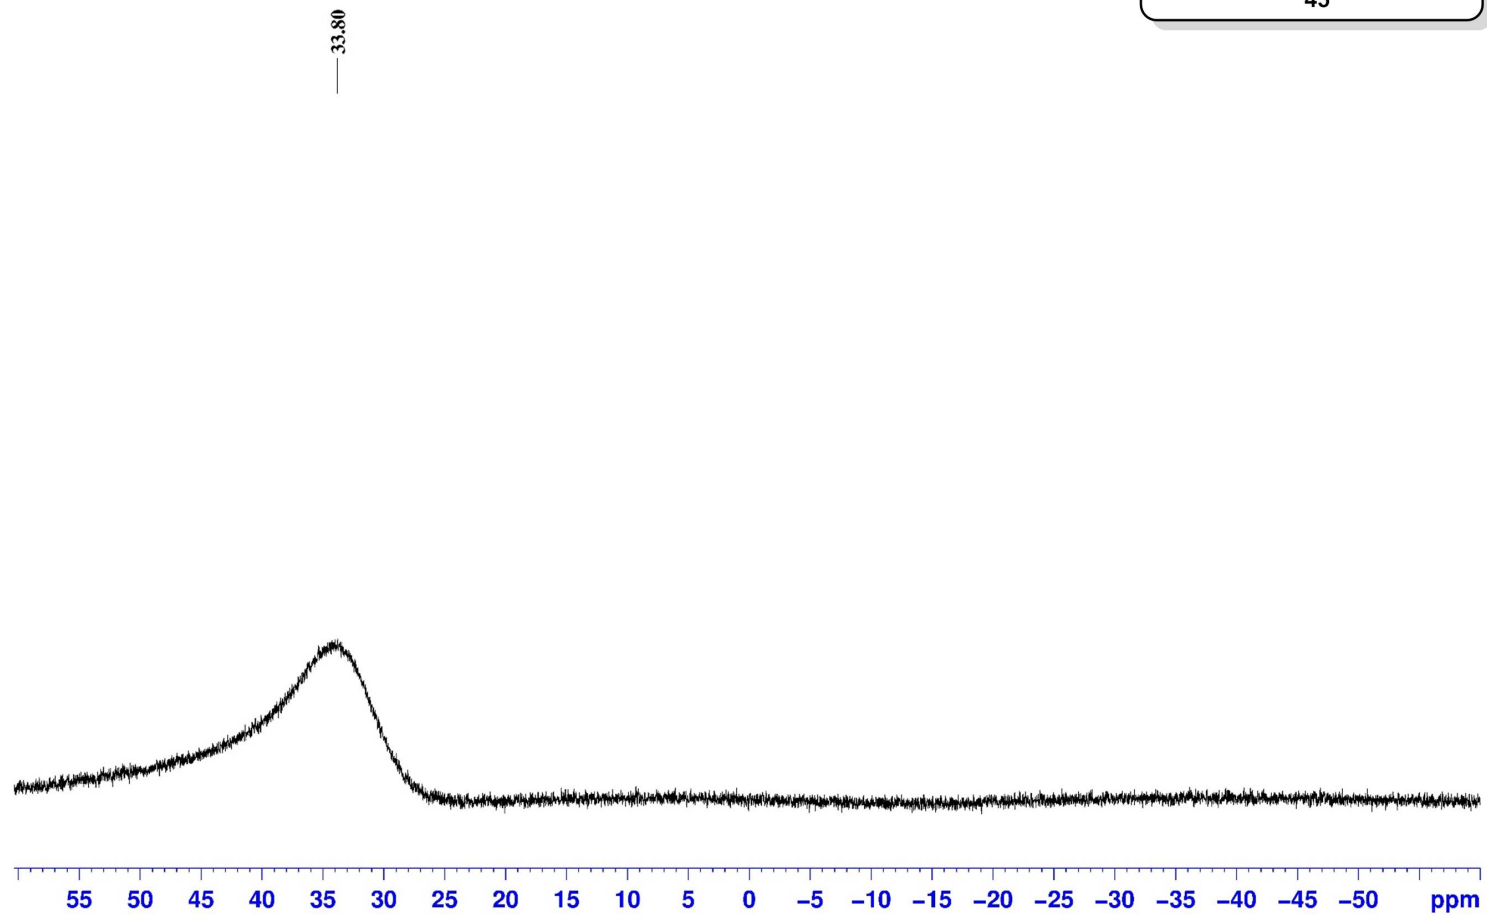

# <sup>1</sup>H NMR

4-((4-(2-((3*R*)-3-isopropyl-1-methylcyclopentyl)-1-(4,4,5,5-tetramethyl-1,3,2-dioxaborolan-2-yl)ethyl)phenyl)sulfonyl)morpholine  
500 MHz, CDCl<sub>3</sub>

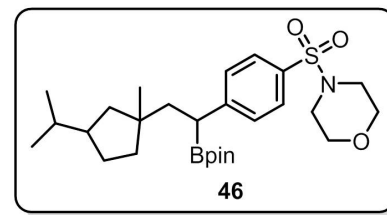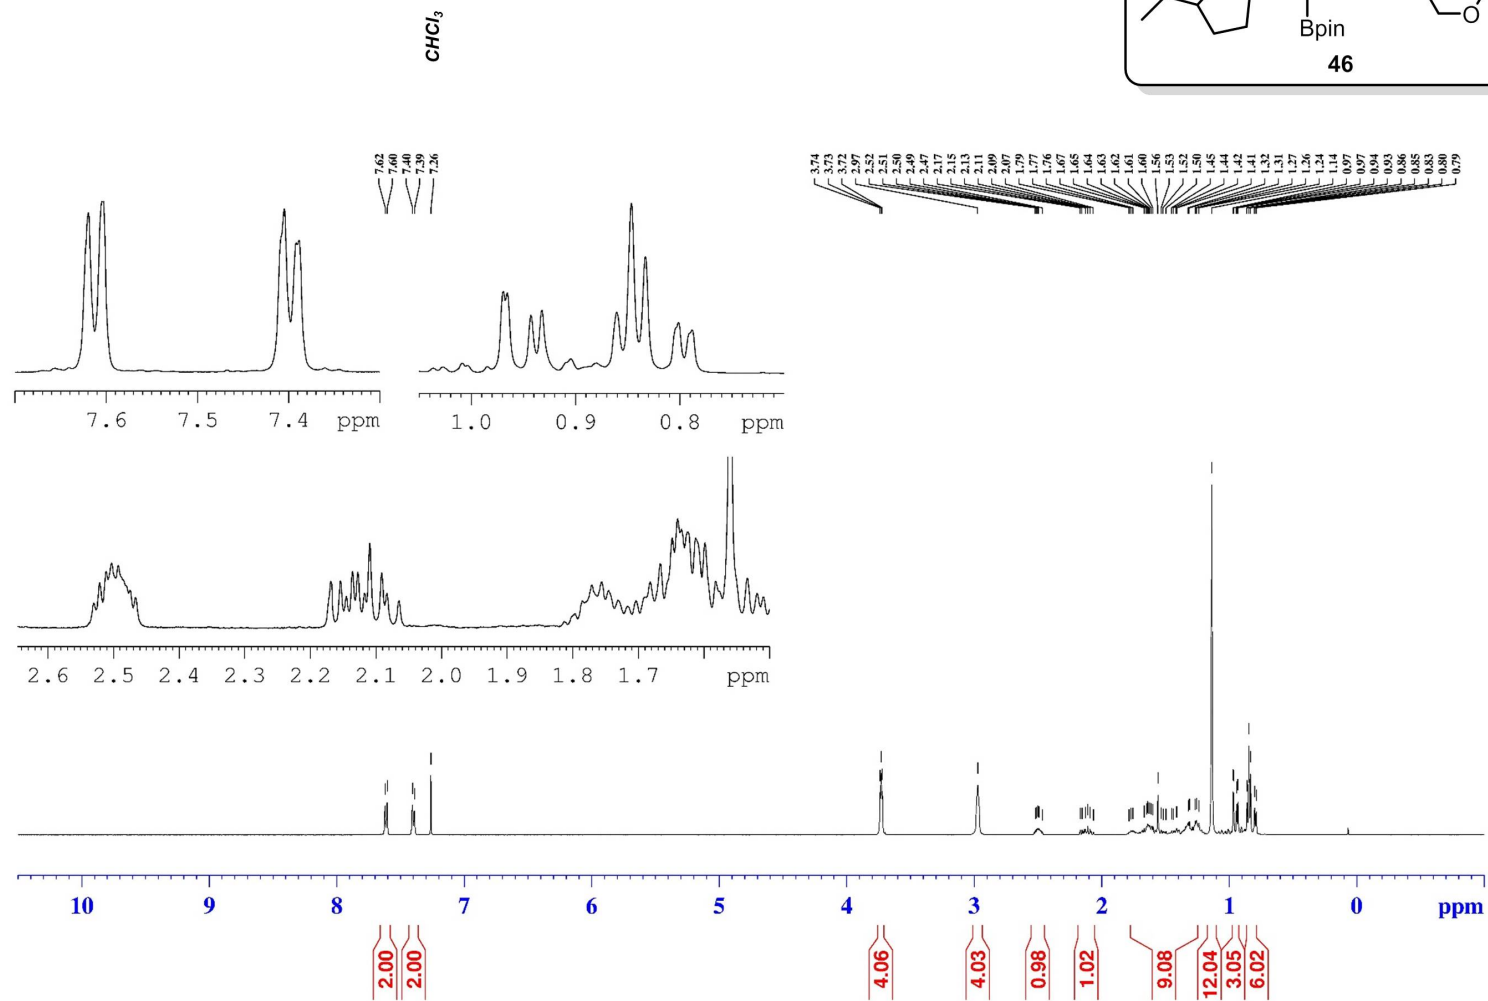

S285

**<sup>13</sup>C NMR**

4-((4-(2-(3-Isopropyl-1-methylcyclopentyl)-1-(4,4,5,5-tetramethyl-1,3,2-dioxaborolan-2-yl)ethyl)phenyl)sulfonyl)morpholine  
125 MHz, CDCl<sub>3</sub>

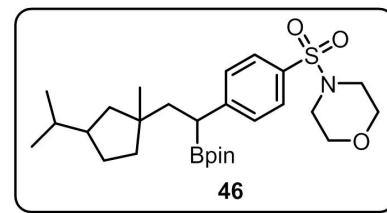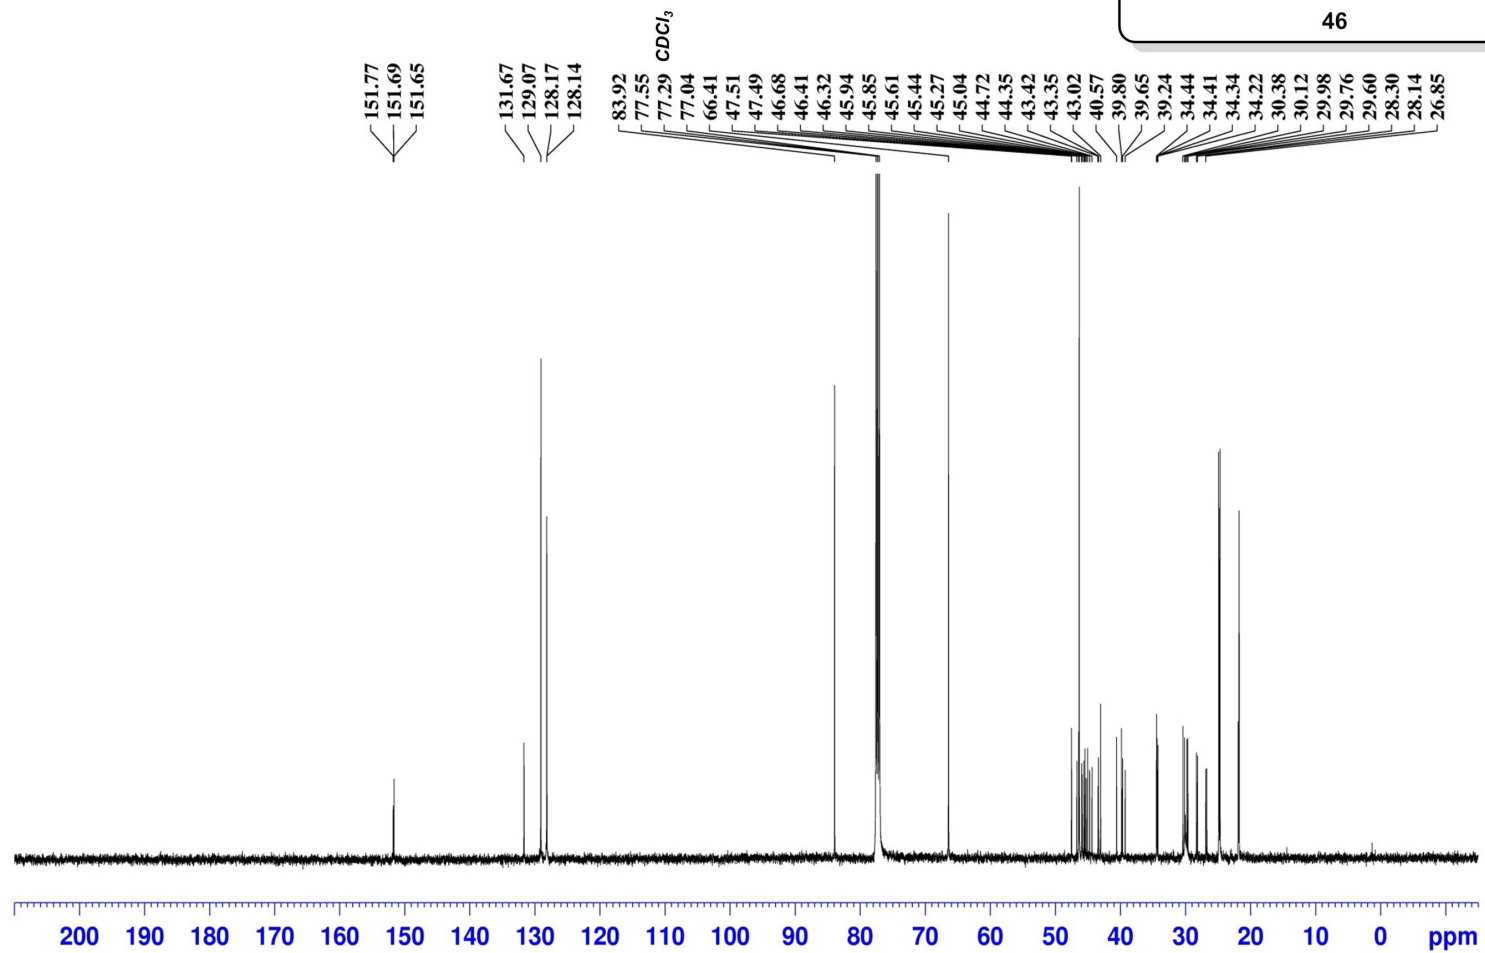

**<sup>11</sup>B NMR**

4-((4-(2-((3*R*)-3-isopropyl-1-methylcyclopentyl)-1-(4,4,5,5-tetramethyl-1,3,2-dioxaborolan-2-yl)ethyl)phenyl)sulfonyl)morpholine  
128 MHz, CDCl<sub>3</sub>

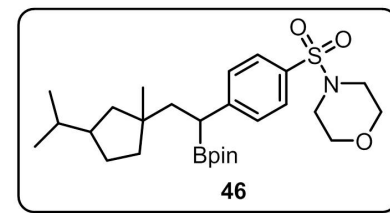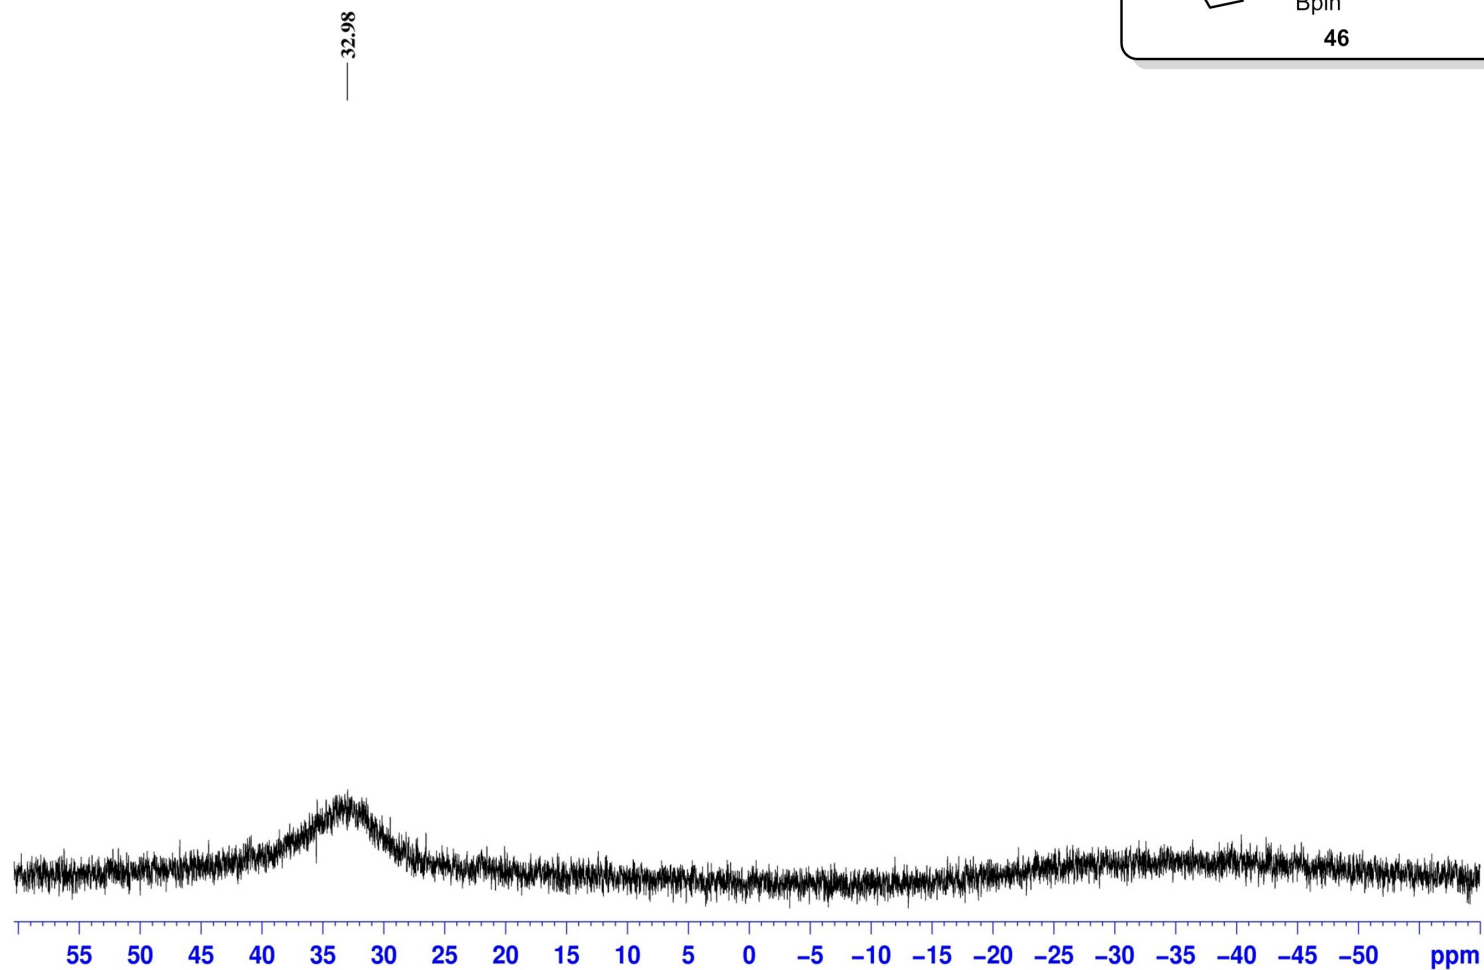

# <sup>1</sup>H NMR

ethyl 3,3-dimethyl-5-(4-(morpholinosulfonyl)phenyl)-5-(4,4,5,5-tetramethyl-1,3,2-dioxaborolan-2-yl)pentanoate  
500 MHz, CDCl<sub>3</sub>

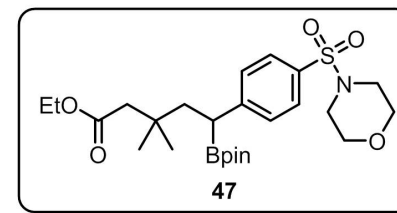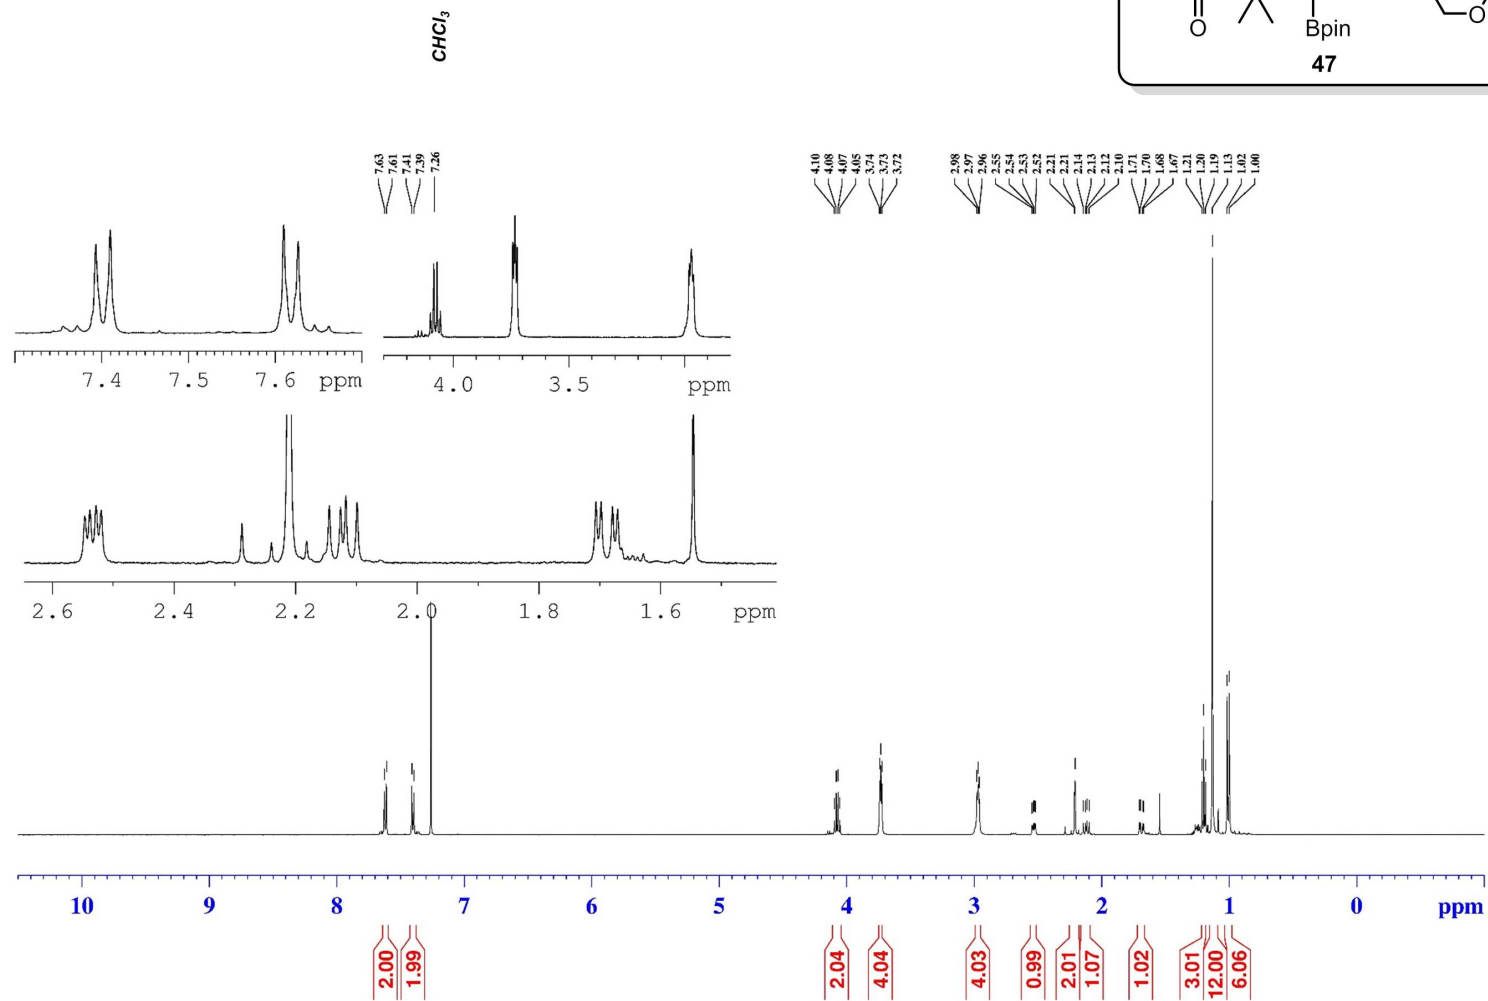

S288



**<sup>13</sup>C NMR**

Ethyl 3,3-dimethyl-5-(4-(morpholinosulfonyl)phenyl)-5-(4,4,5,5-tetramethyl-1,3,2-dioxaborolan-2-yl)pentanoate  
125 MHz, CDCl<sub>3</sub>

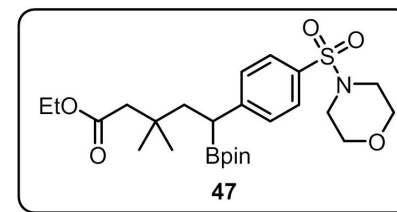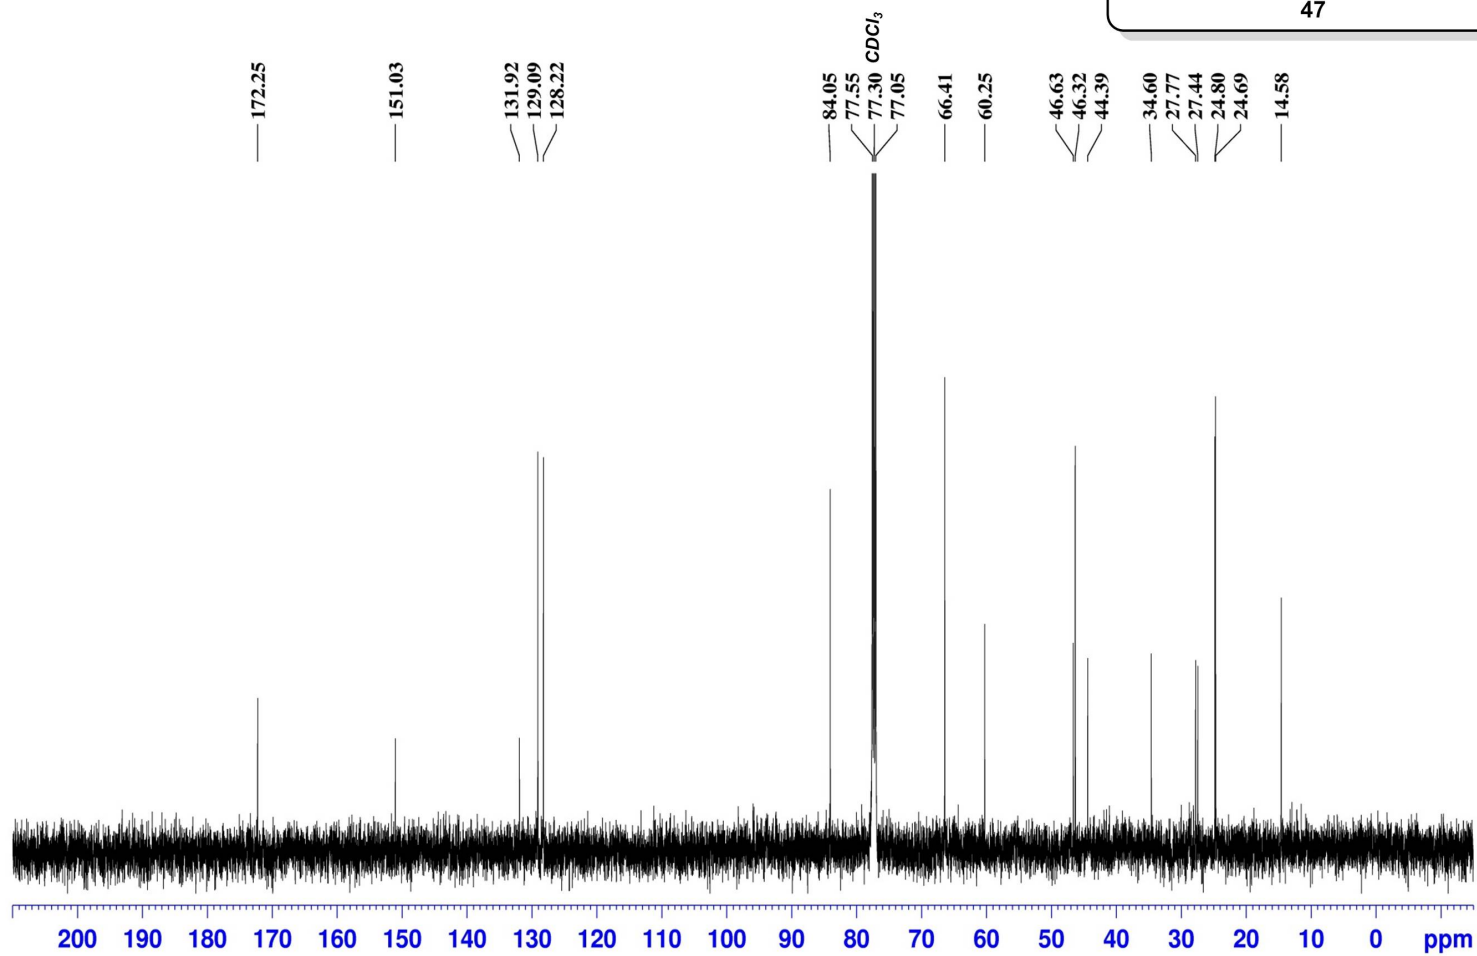

**<sup>11</sup>B NMR**

ethyl 3,3-dimethyl-5-(4-(morpholinosulfonyl)phenyl)-5-(4,4,5,5-tetramethyl-1,3,2-dioxaborolan-2-yl)pentanoate  
128 MHz, CDCl<sub>3</sub>

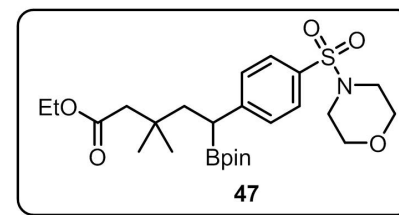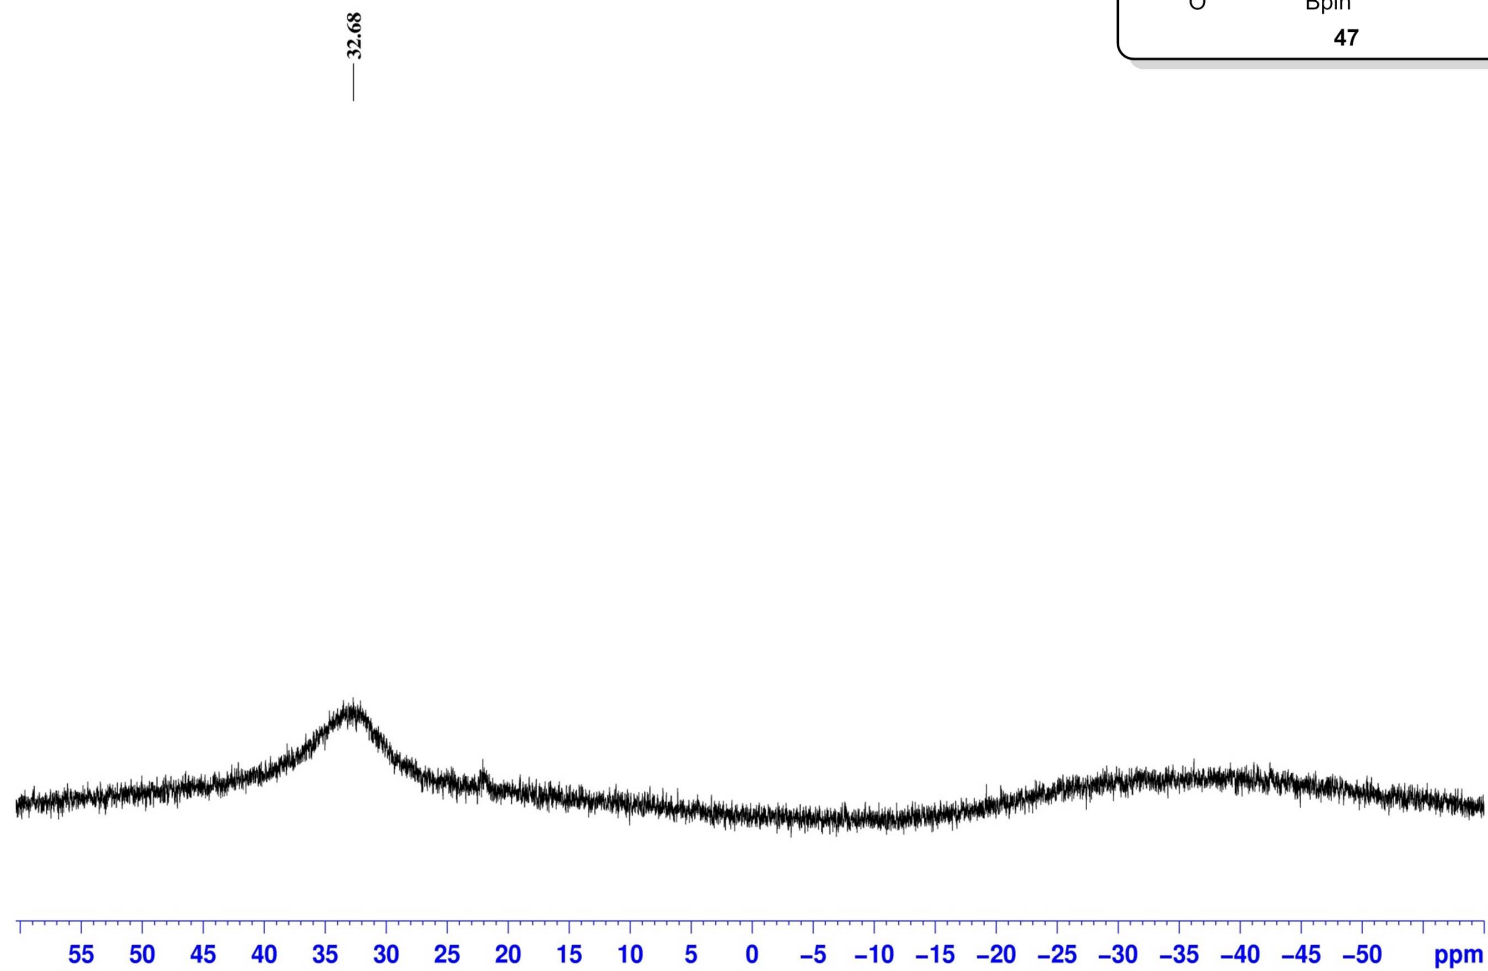

# <sup>1</sup>H NMR

4,4-dimethyl-6-(4-(morpholinylsulfonyl)phenyl)-6-(4,4,5,5-tetramethyl-1,3,2-dioxaborolan-2-yl)hexan-2-one  
500 MHz, CDCl<sub>3</sub>

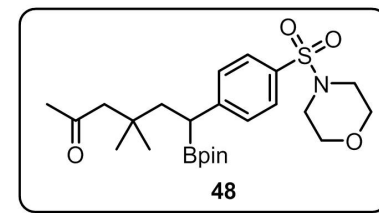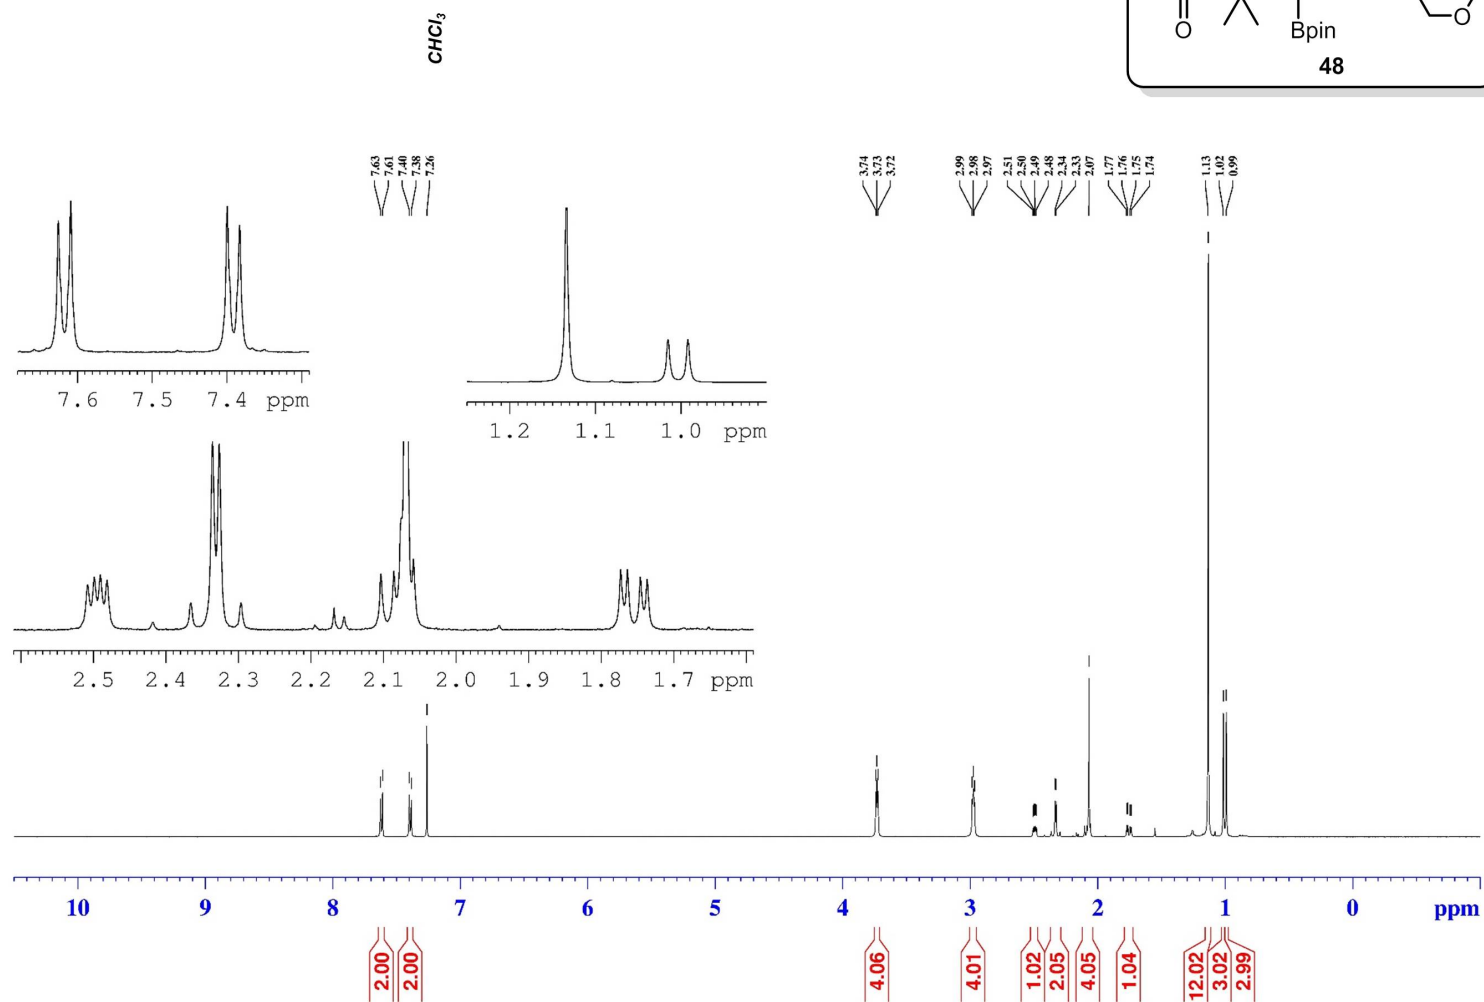

**<sup>13</sup>C NMR**

4,4-Dimethyl-6-(4-(morphinosulfonyl)phenyl)-6-(4,4,5,5-tetramethyl-1,3,2-dioxaborolan-2-yl)hexan-2-one  
125 MHz, CDCl<sub>3</sub>

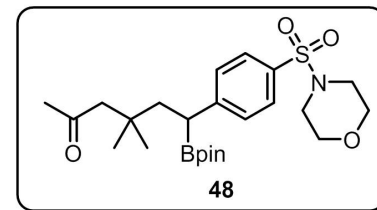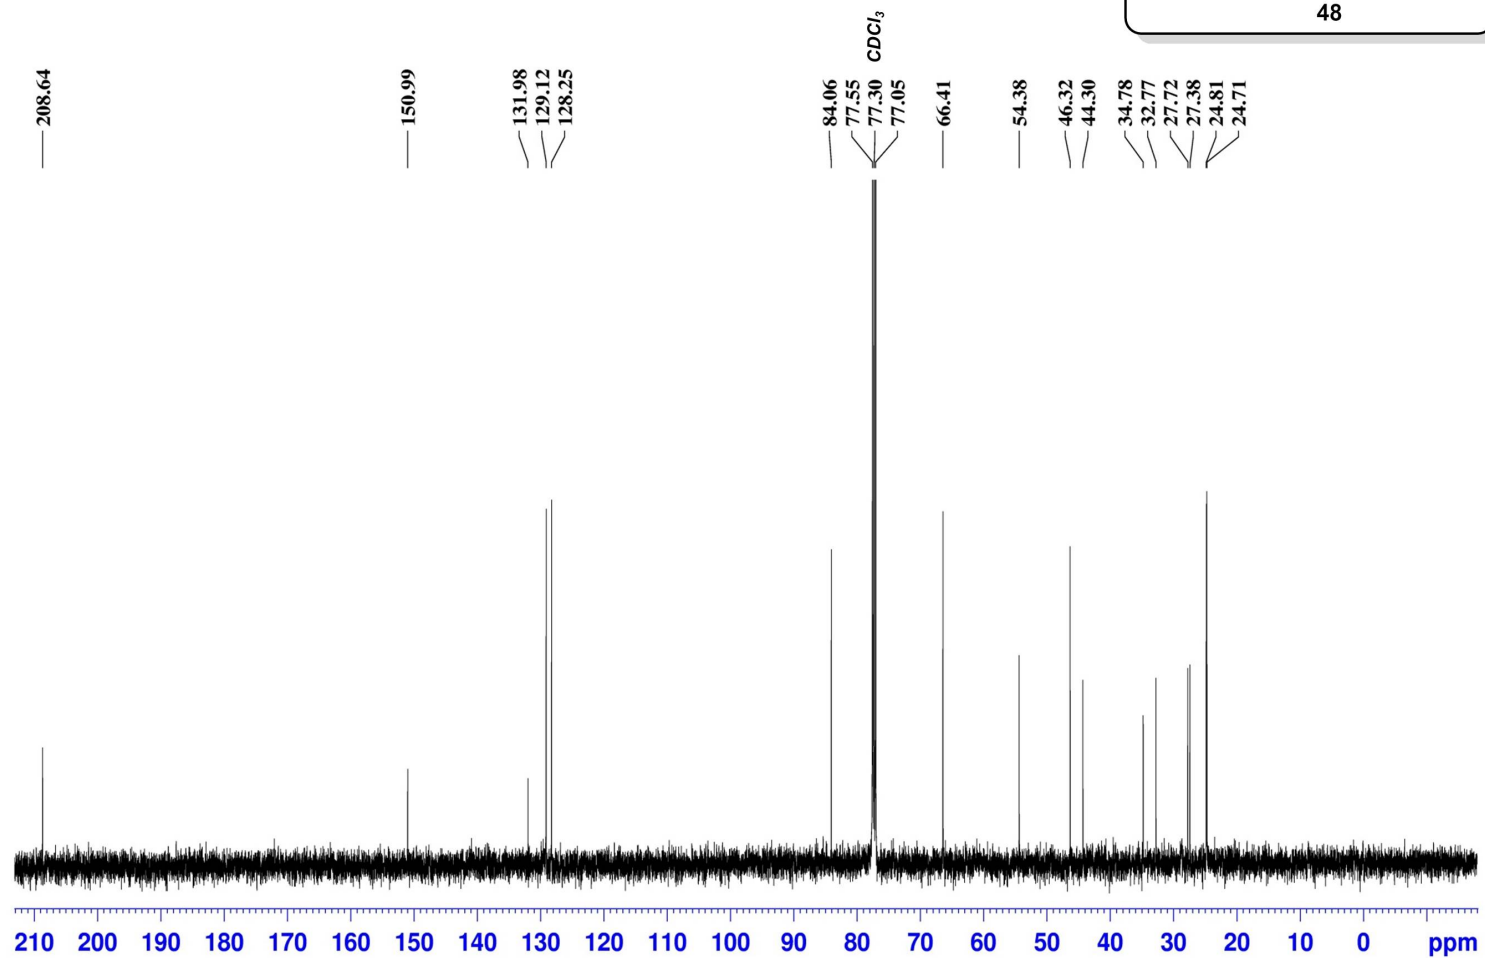

**<sup>11</sup>B NMR**

4,4-dimethyl-6-(4-(morphinosulfonyl)phenyl)-6-(4,4,5,5-tetramethyl-1,3,2-dioxaborolan-2-yl)hexan-2-one  
128 MHz, CDCl<sub>3</sub>

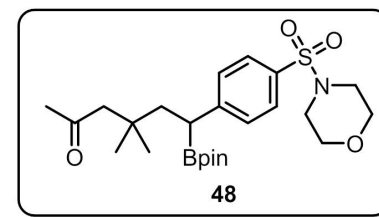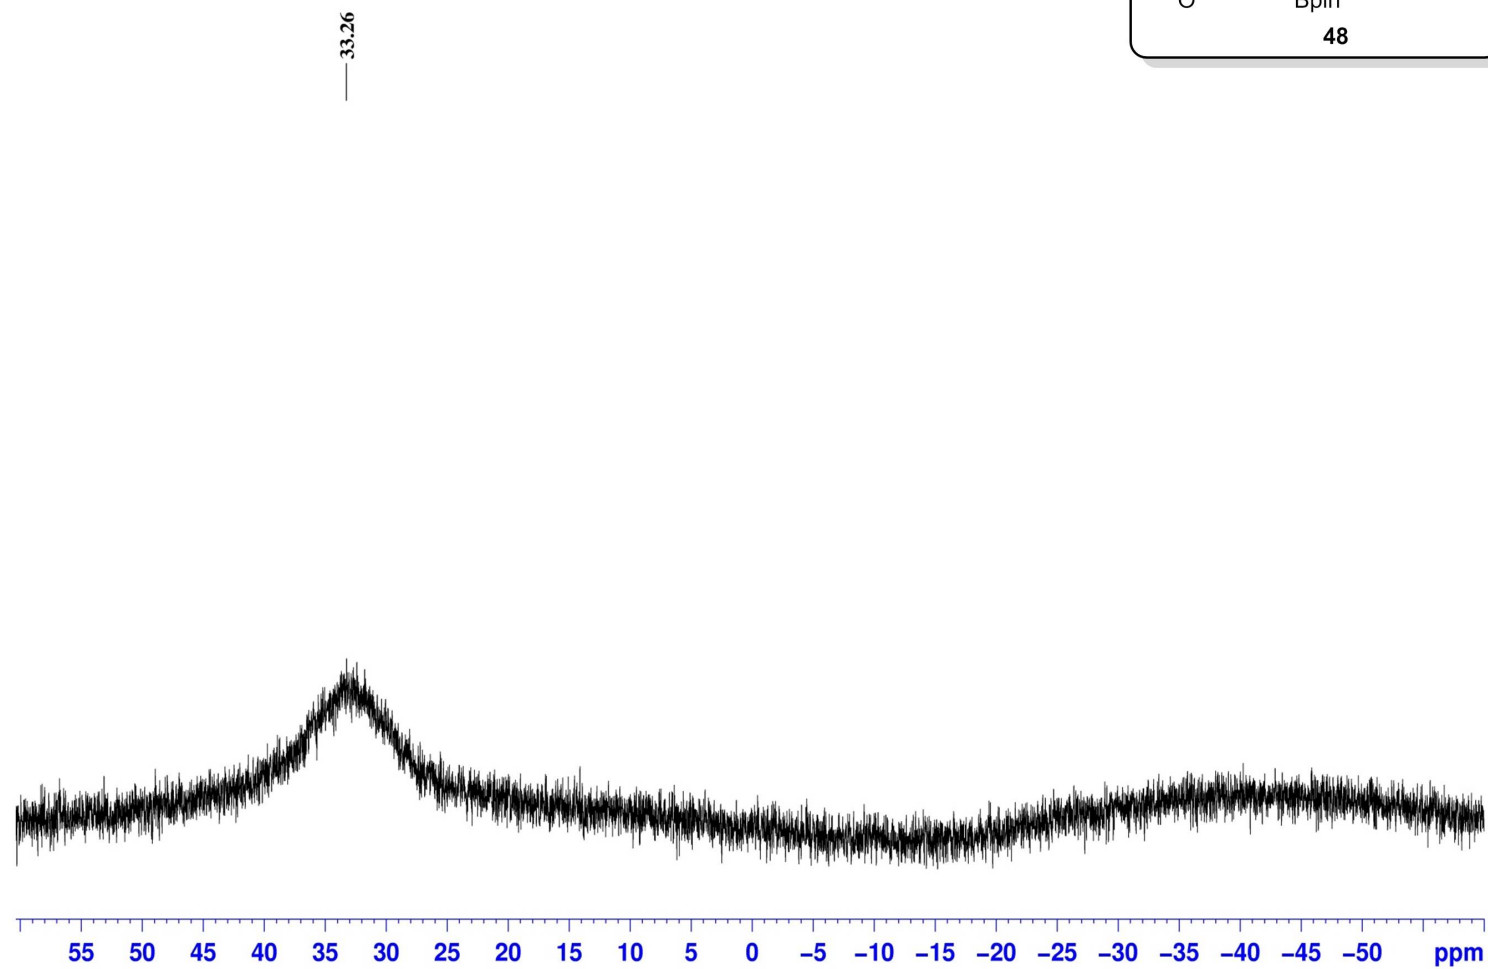

# <sup>1</sup>H NMR

4-((4-(6-(2,5-dimethylphenoxy)-3,3-dimethyl-1-(4,4,5,5-tetramethyl-1,3,2-dioxaborolan-2-yl)hexyl)phenyl)sulfonyl)morpholine  
500 MHz, CDCl<sub>3</sub>

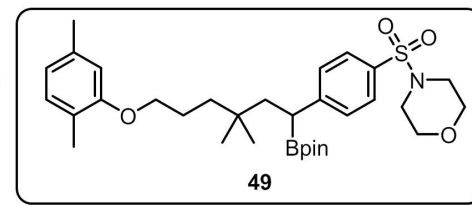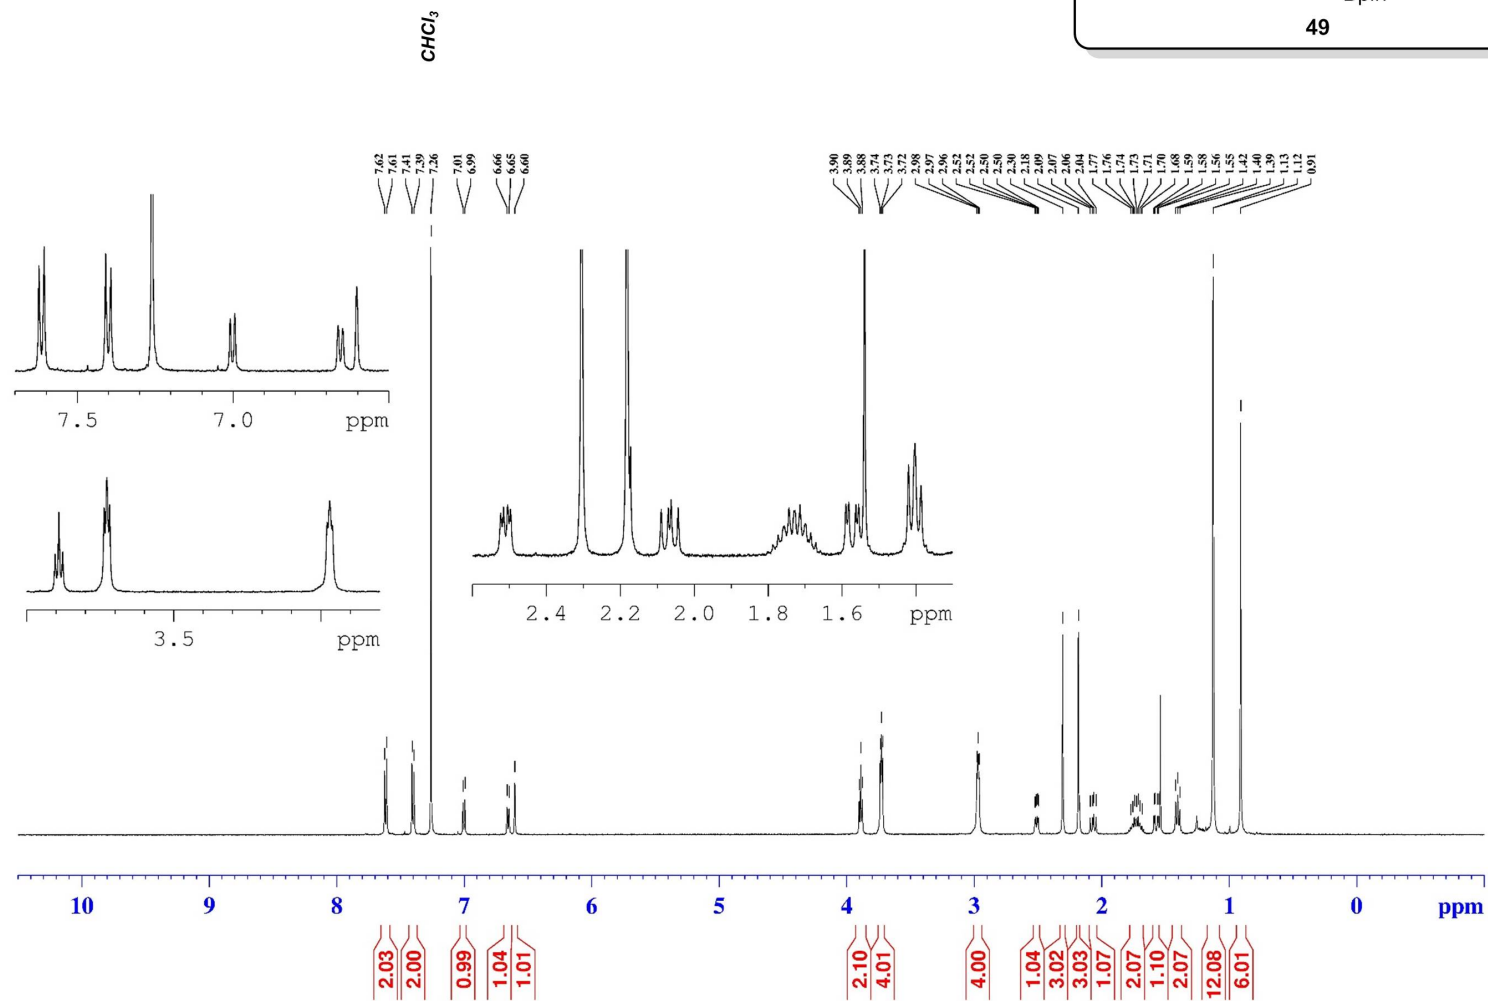

**<sup>13</sup>C NMR**

4-((4-(6-(2,5-Dimethylphenoxy)-3,3-dimethyl-1-(4,4,5,5-tetramethyl-1,3,2-dioxaborolan-2-yl)hexyl)phenyl)sulfonyl)morpholine  
125 MHz, CDCl<sub>3</sub>

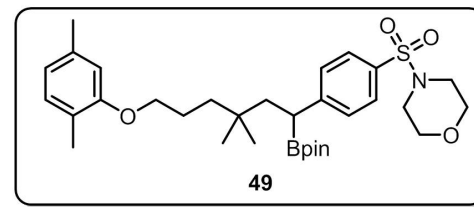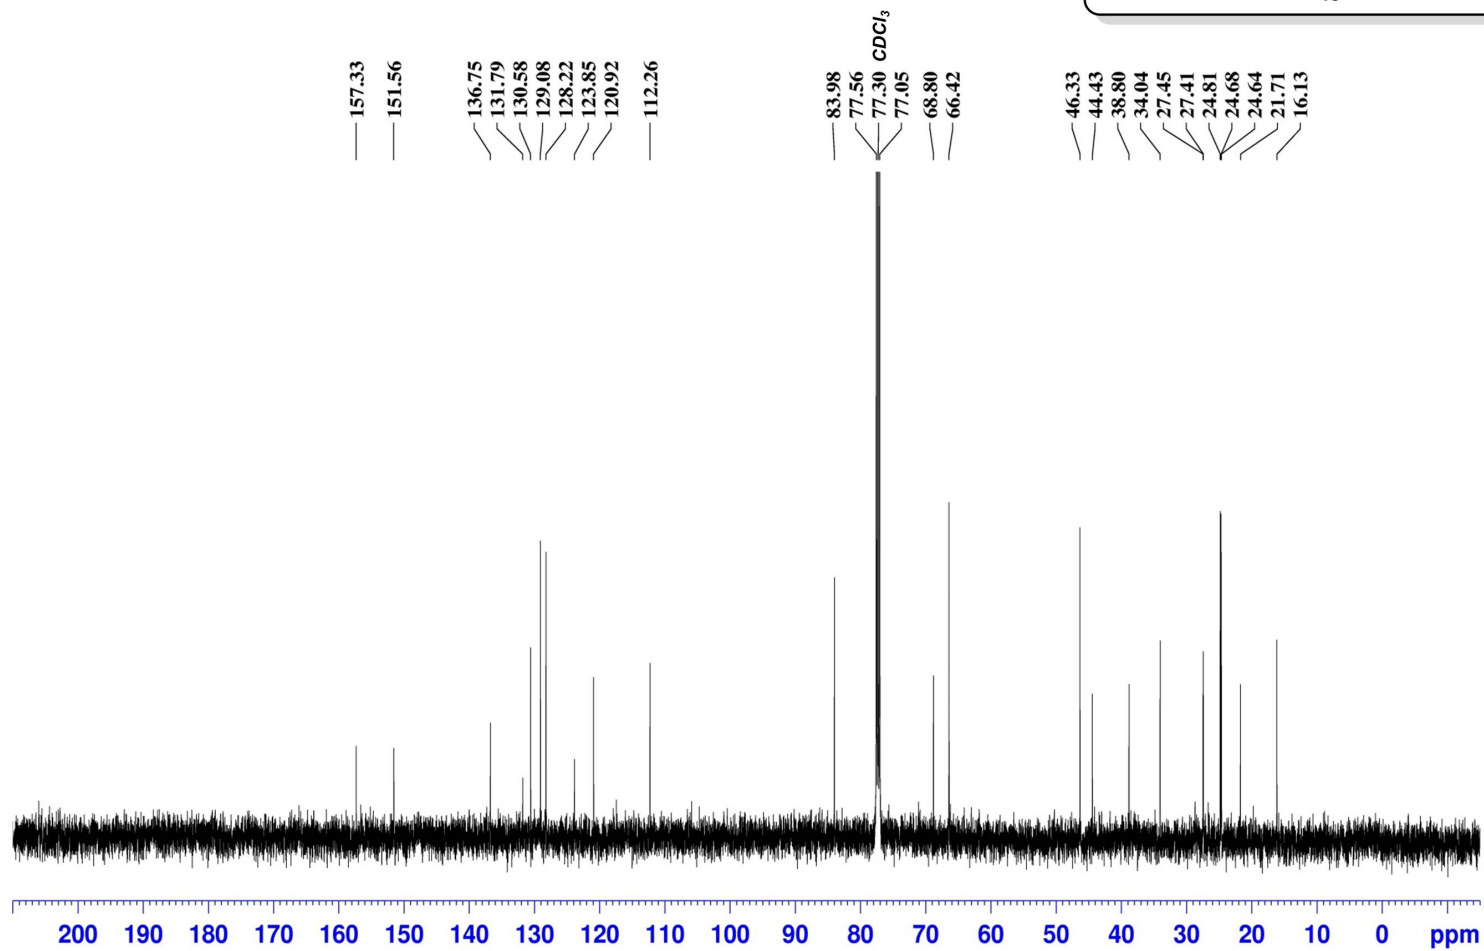

**<sup>11</sup>B NMR**

4-((4-(6-(2,5-dimethylphenoxy)-3,3-dimethyl-1-(4,4,5,5-tetramethyl-1,3,2-dioxaborolan-2-yl)hexyl)phenyl)sulfonyl)morpholine  
128 MHz, CDCl<sub>3</sub>

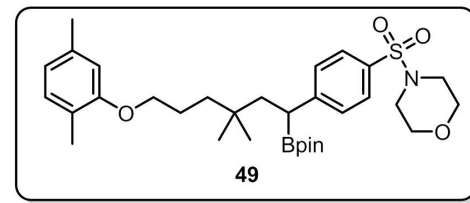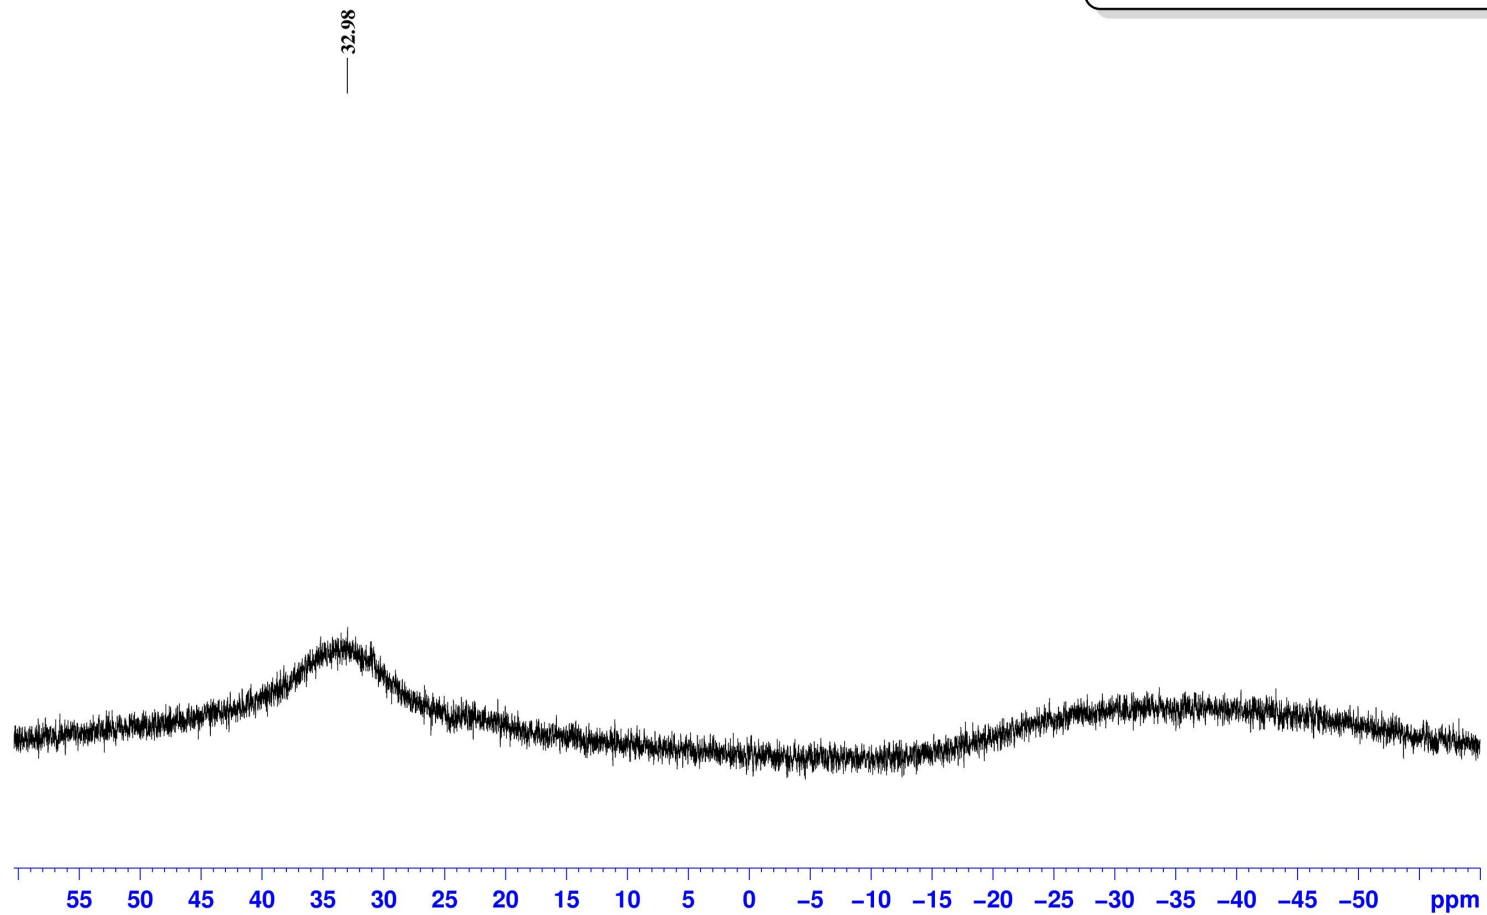



tert-butyl 2-(4-cyanophenyl)-4,4-dimethylpentanoate  
125 MHz, CDCl<sub>3</sub>

<sup>1</sup>H NMR

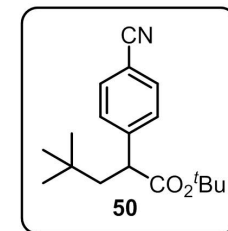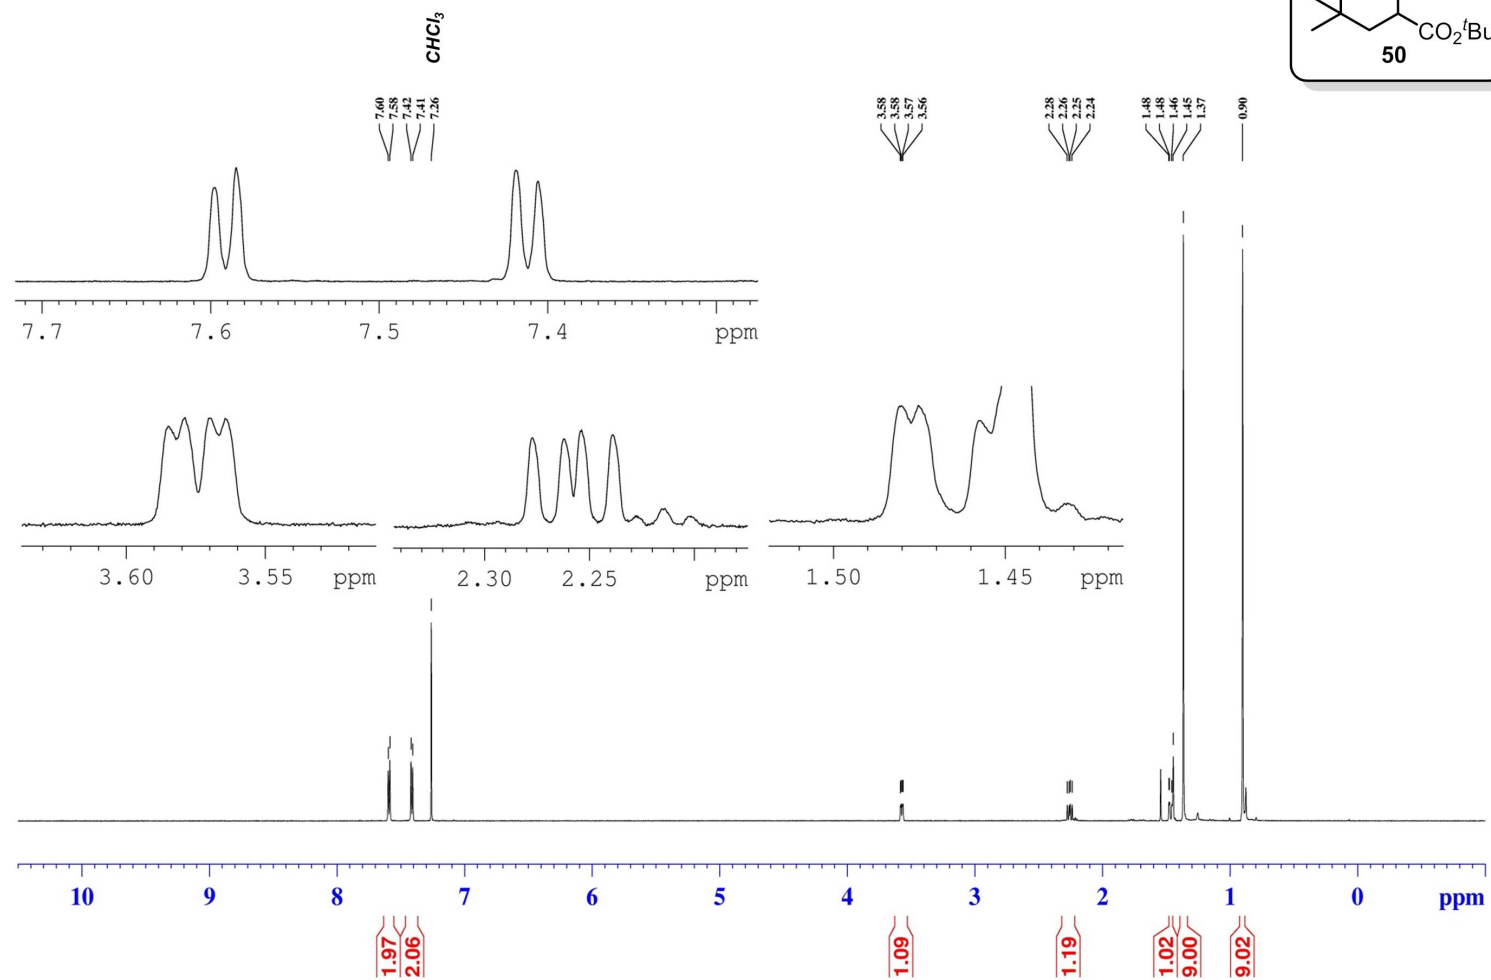

*Tert*-butyl 2-(4-cyanophenyl)-4,4-dimethylpentanoate  
125 MHz, CDCl<sub>3</sub>

<sup>13</sup>C NMR

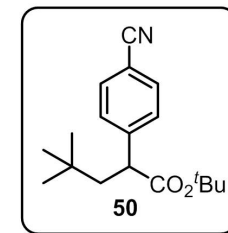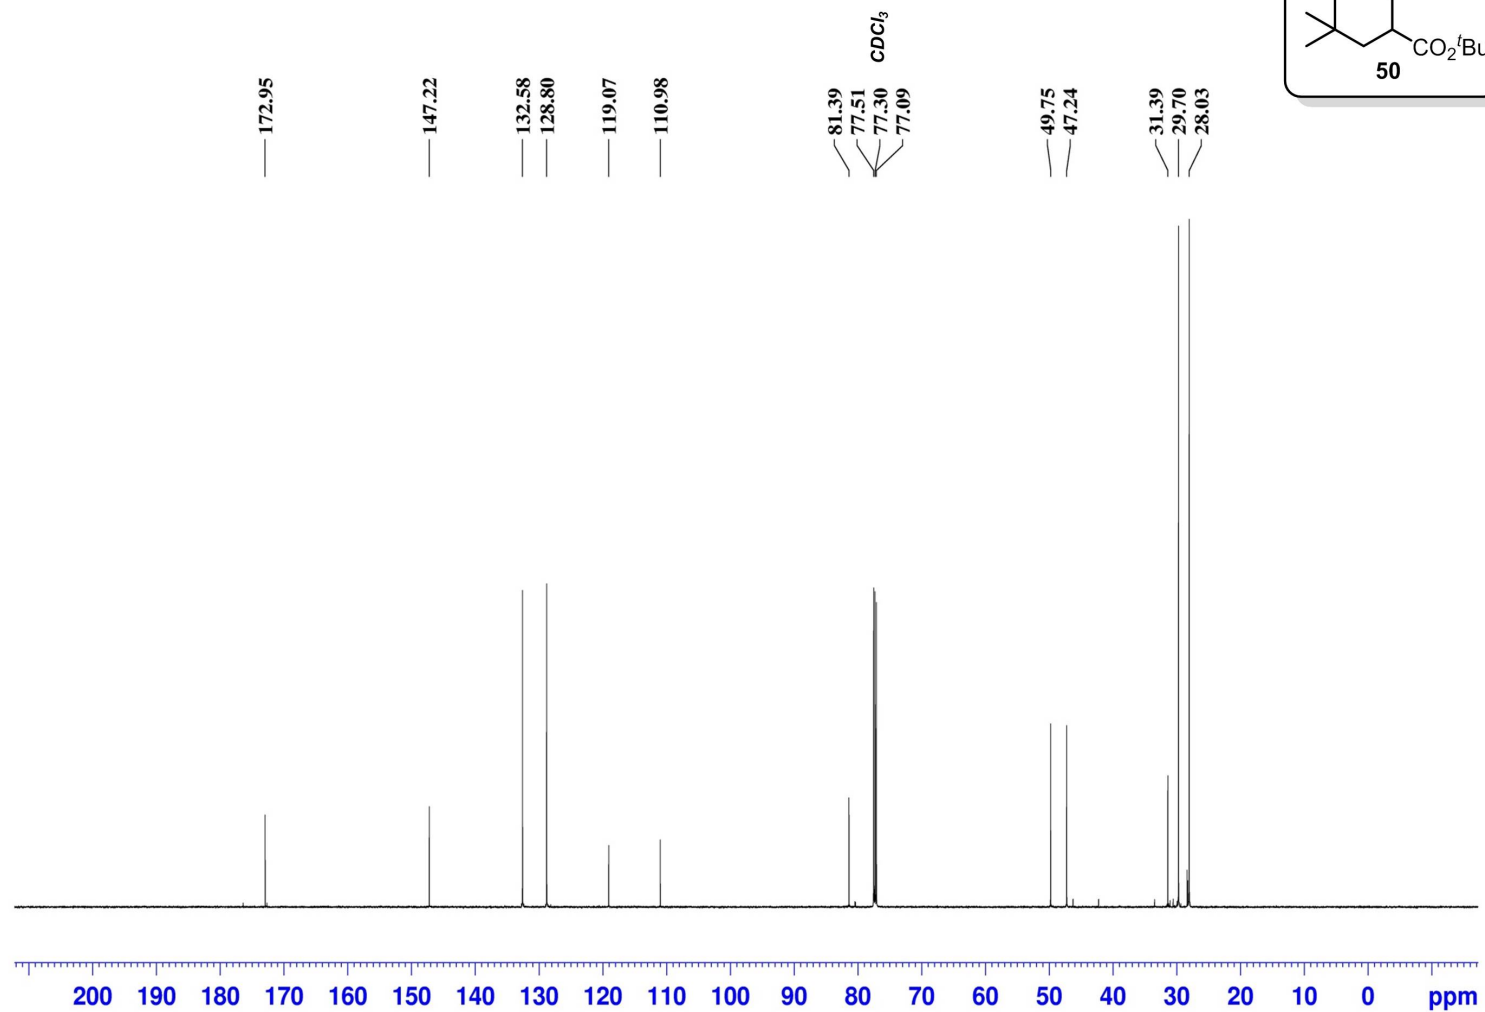

*tert*-Butyl 2-(6-cyanopyridin-3-yl)-4,4-dimethylpentanoate  
125 MHz, CDCl<sub>3</sub>

<sup>1</sup>H NMR

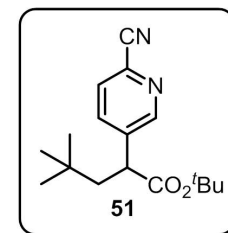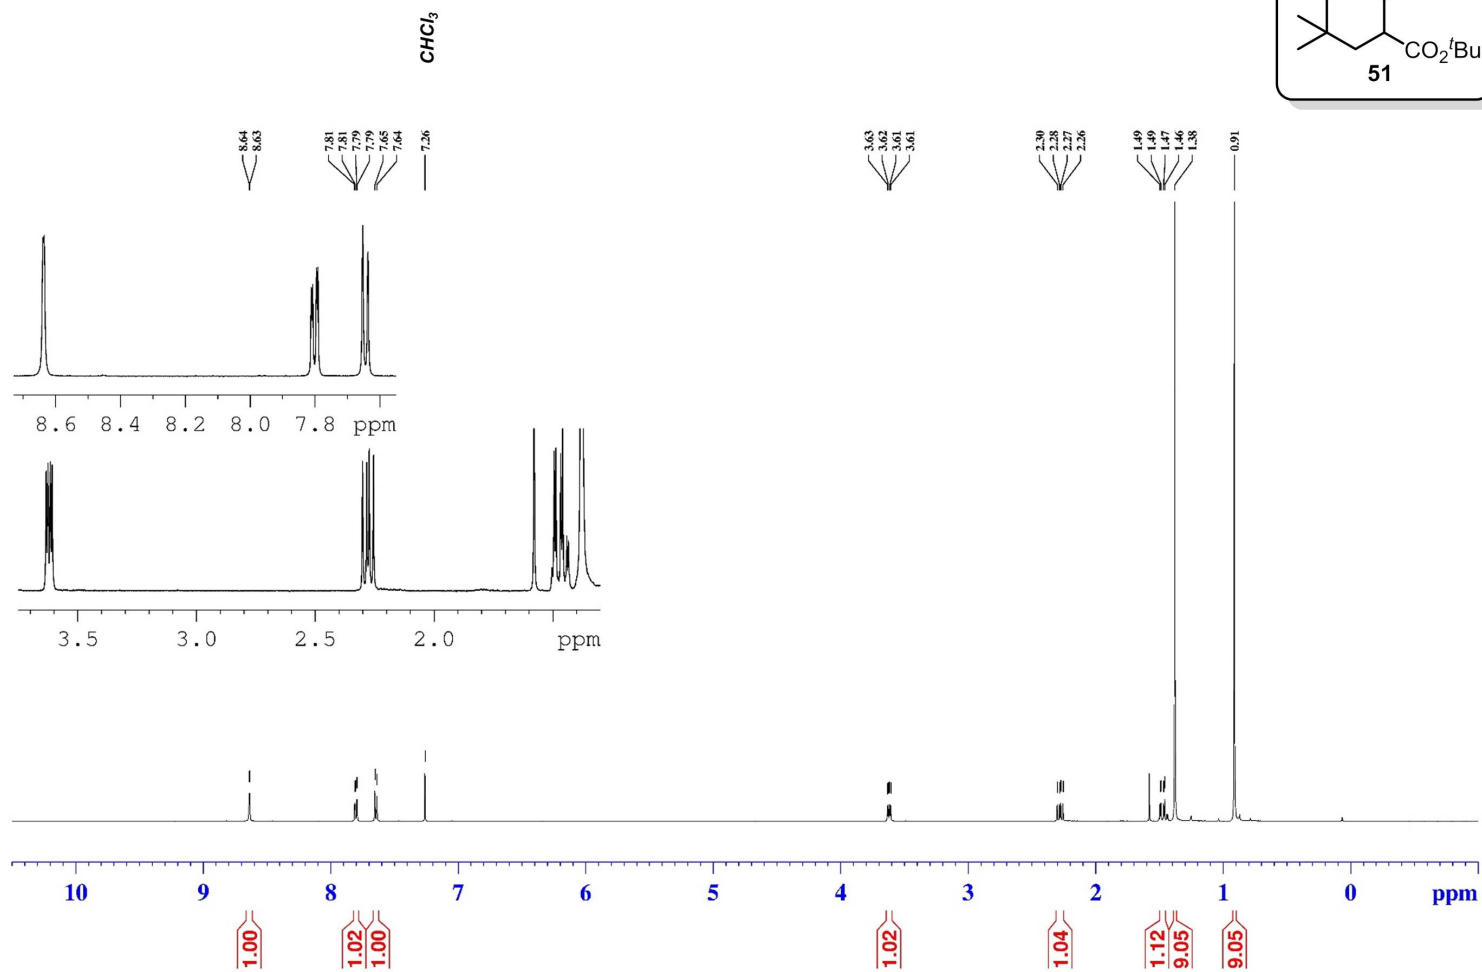

*tert*-Butyl 2-(6-cyanopyridin-3-yl)-4,4-dimethylpentanoate  
125 MHz, CDCl<sub>3</sub>

<sup>13</sup>C NMR

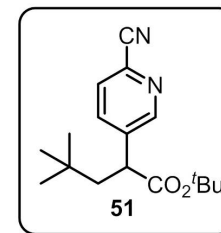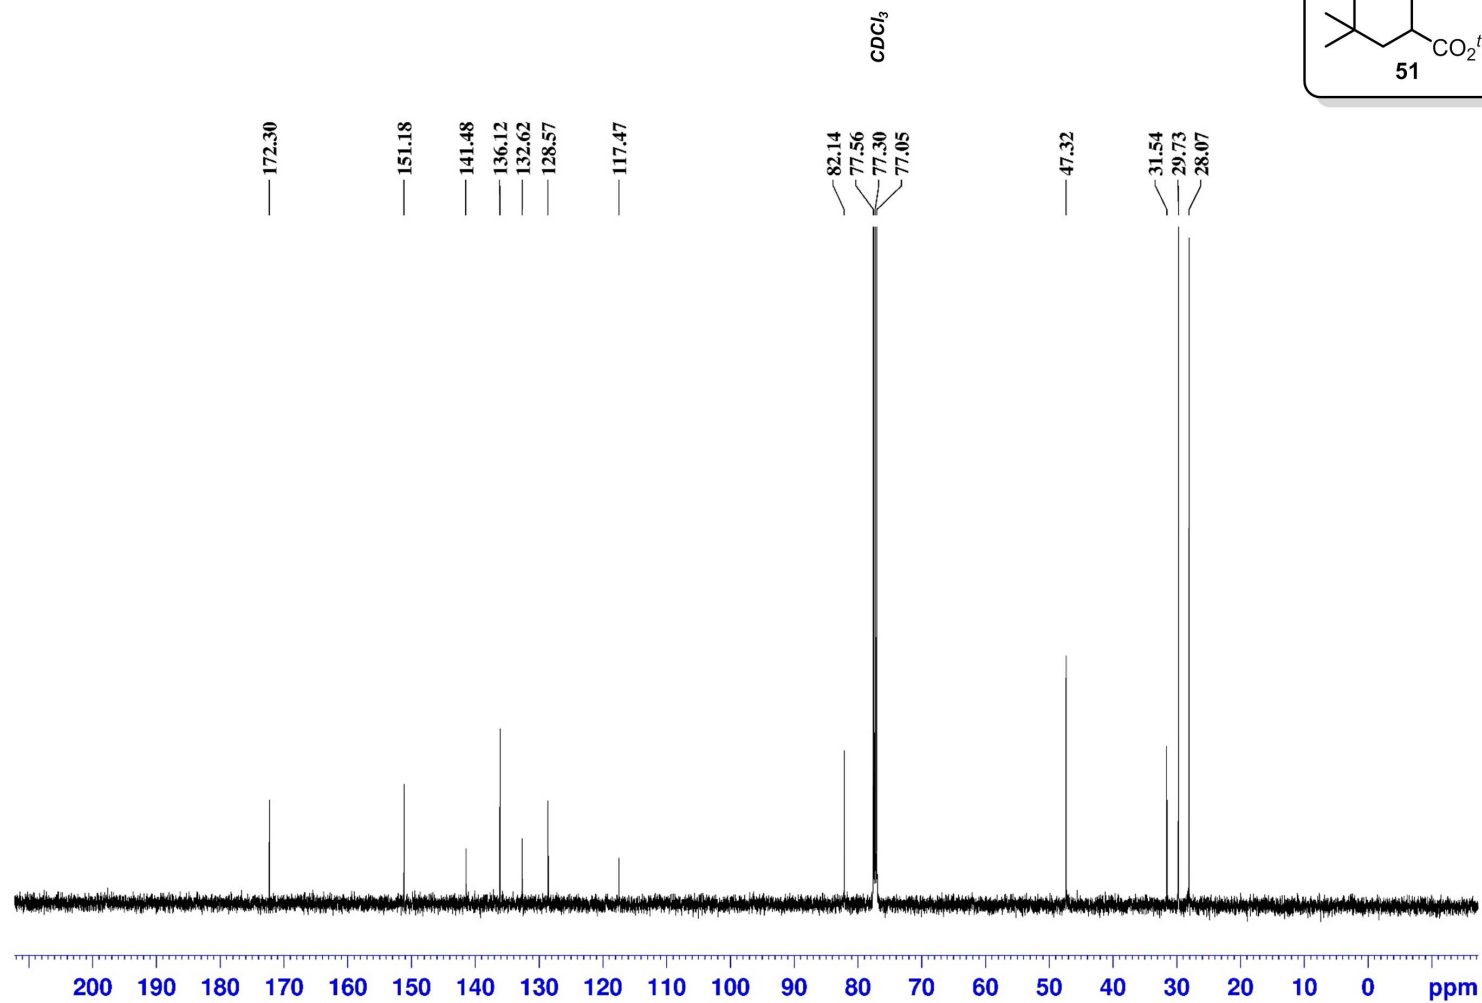

S300

tert-butyl 2-(4-cyanophenyl)-4,4-dimethylpentanoate  
125 MHz, CDCl<sub>3</sub>

<sup>1</sup>H NMR

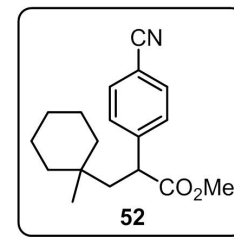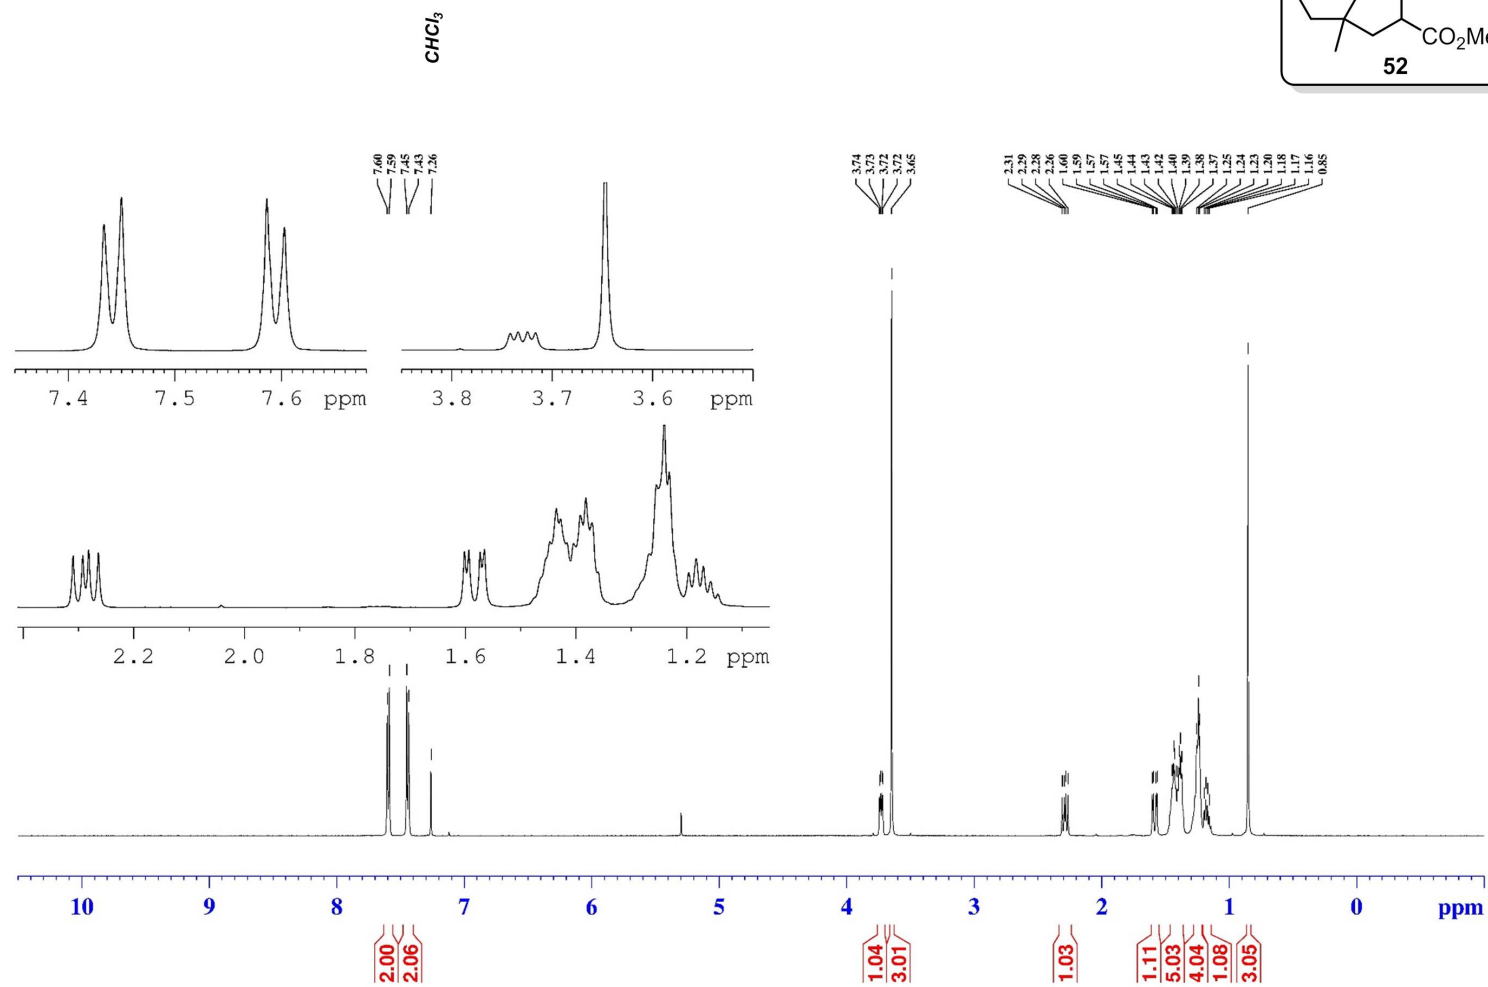

S301

Methyl 2-(4-cyanophenyl)-3-cyclohexylpropanoate  
125 MHz, CDCl<sub>3</sub>

<sup>13</sup>C NMR

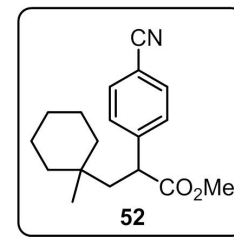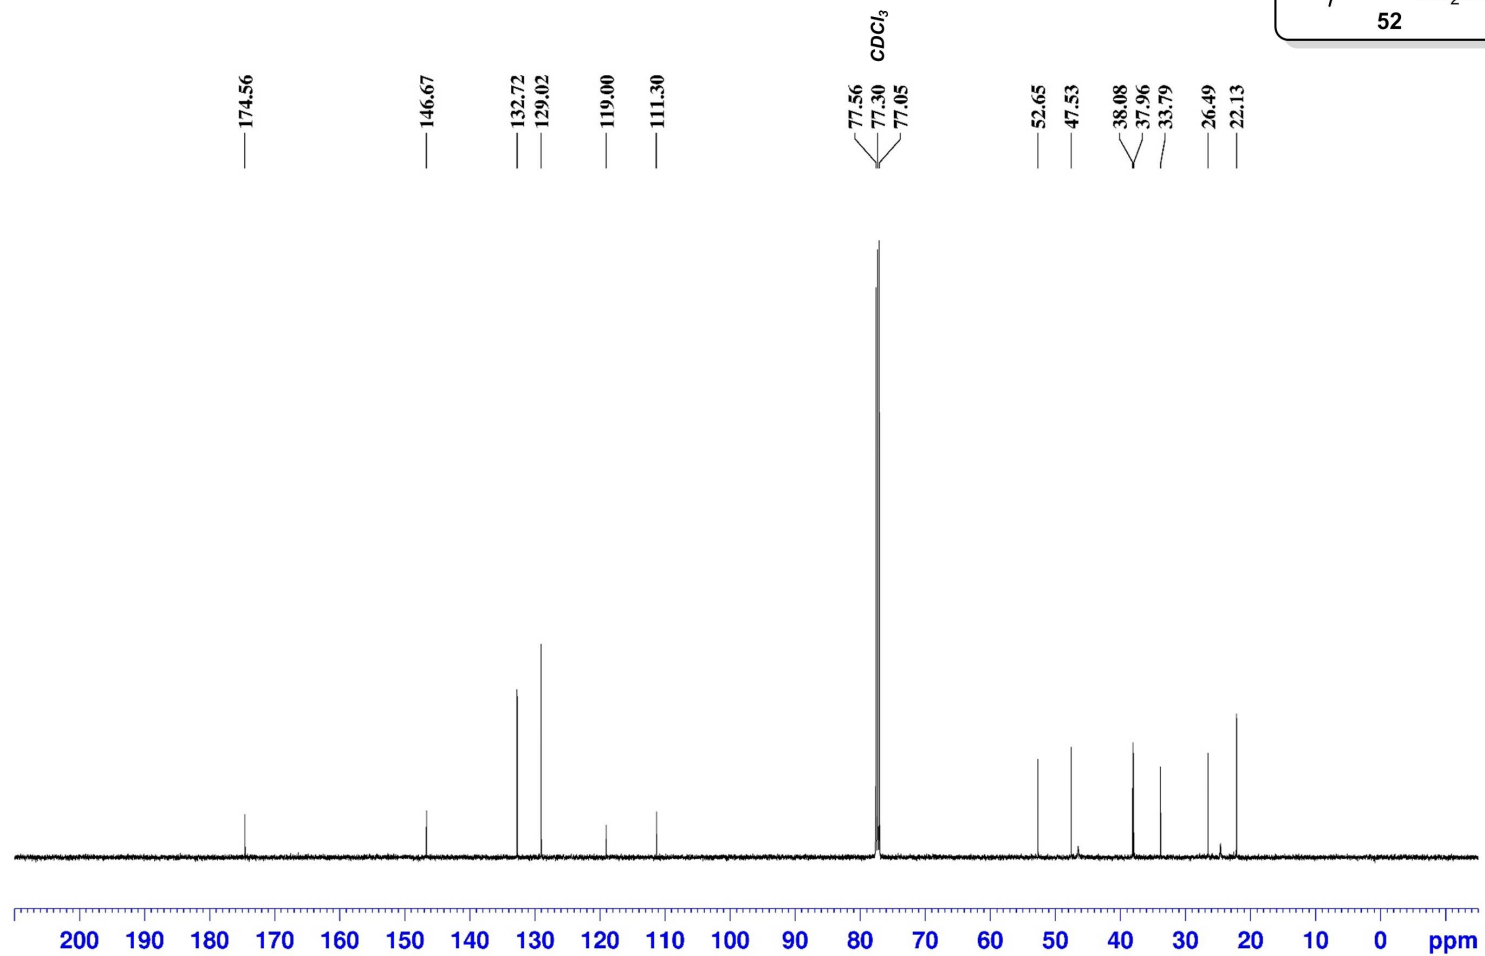

4-(1-cyano-3,3-dimethyl-5-oxohexyl)benzonitrile  
500 MHz, CDCl<sub>3</sub>

<sup>1</sup>H NMR

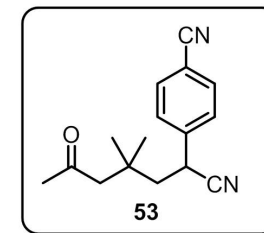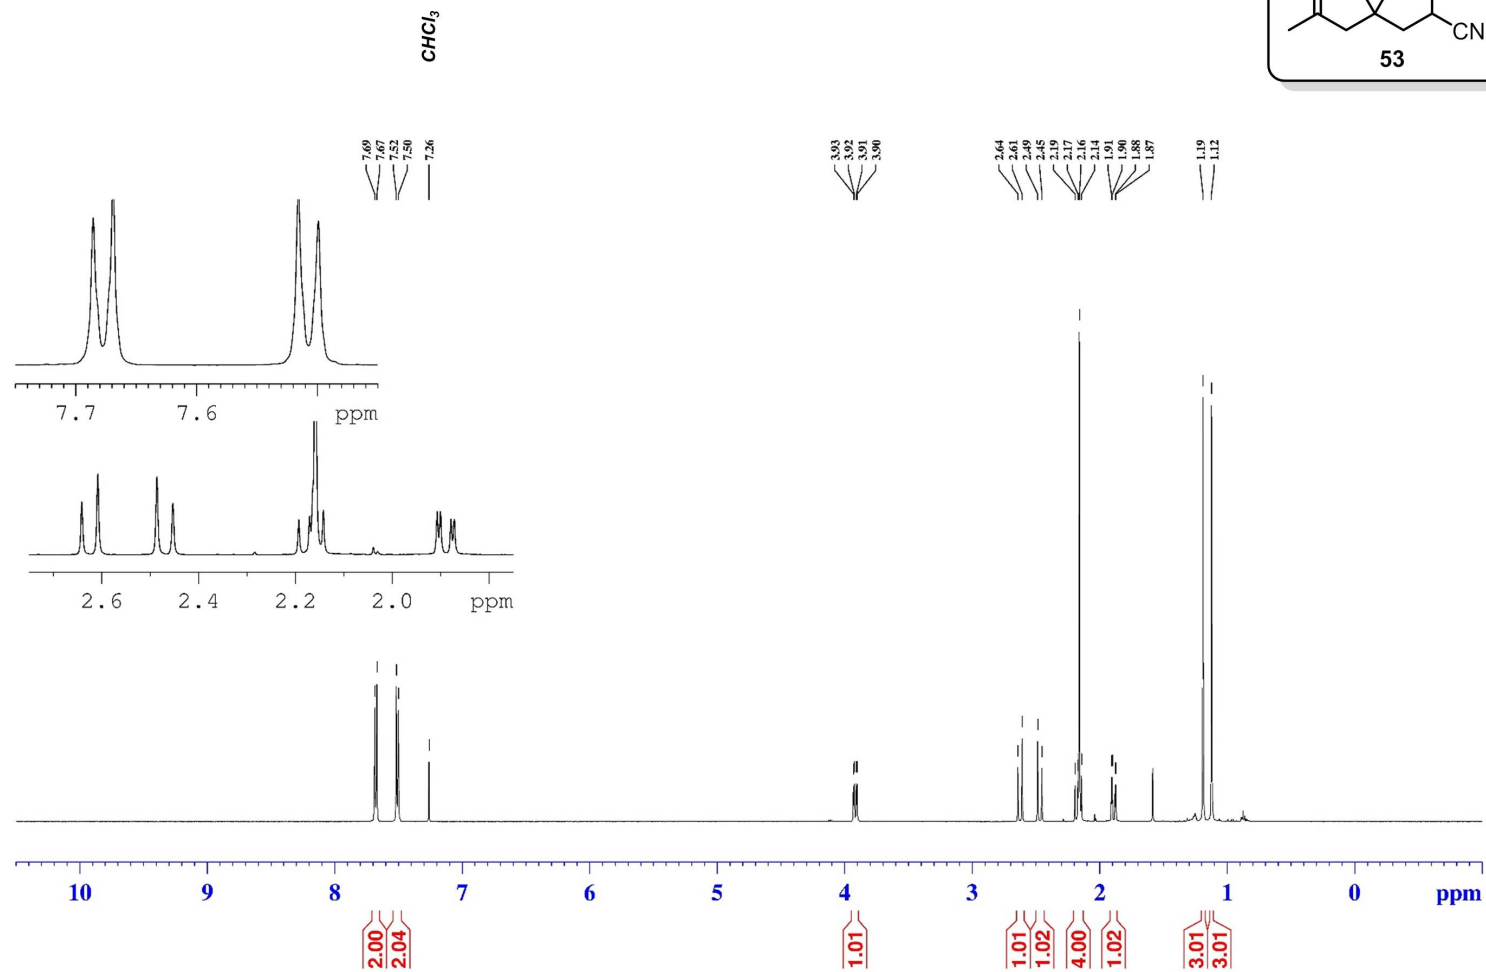

S303

4-(1-Cyano-3,3-dimethyl-5-oxohexyl)benzonitrile  
125 MHz, CDCl<sub>3</sub>

<sup>13</sup>C NMR

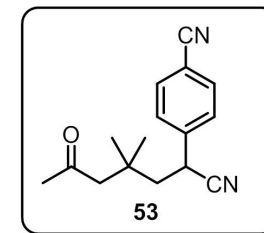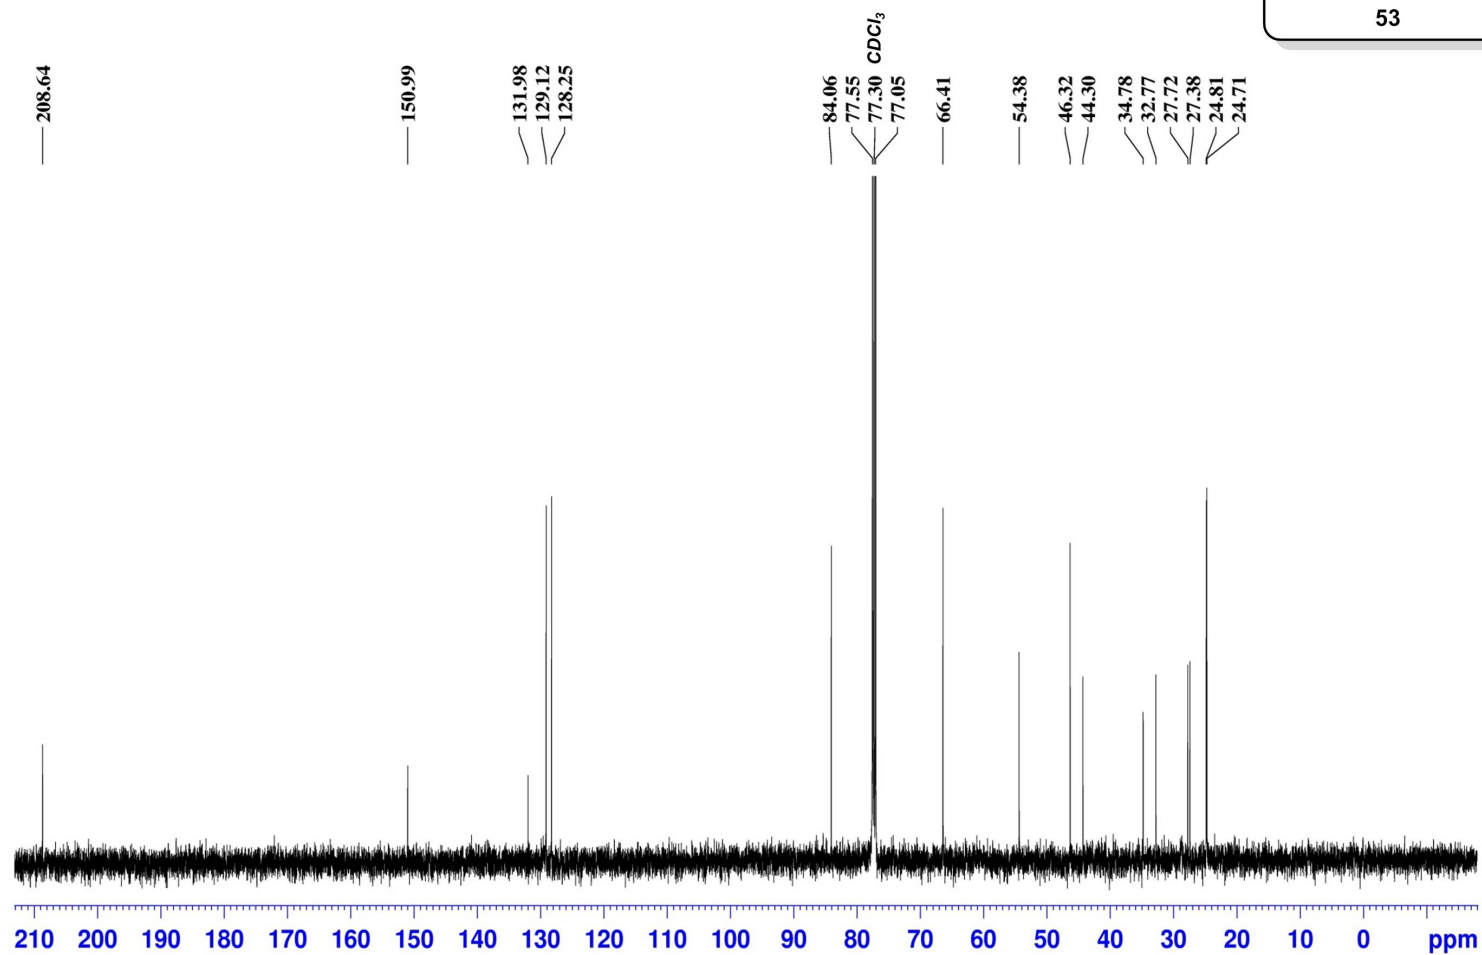

S304



ethyl 2-(4-cyanophenyl)-4,4-dimethyl-6-oxoheptanoate  
500 MHz, CDCl<sub>3</sub>

<sup>1</sup>H NMR

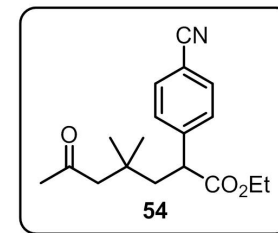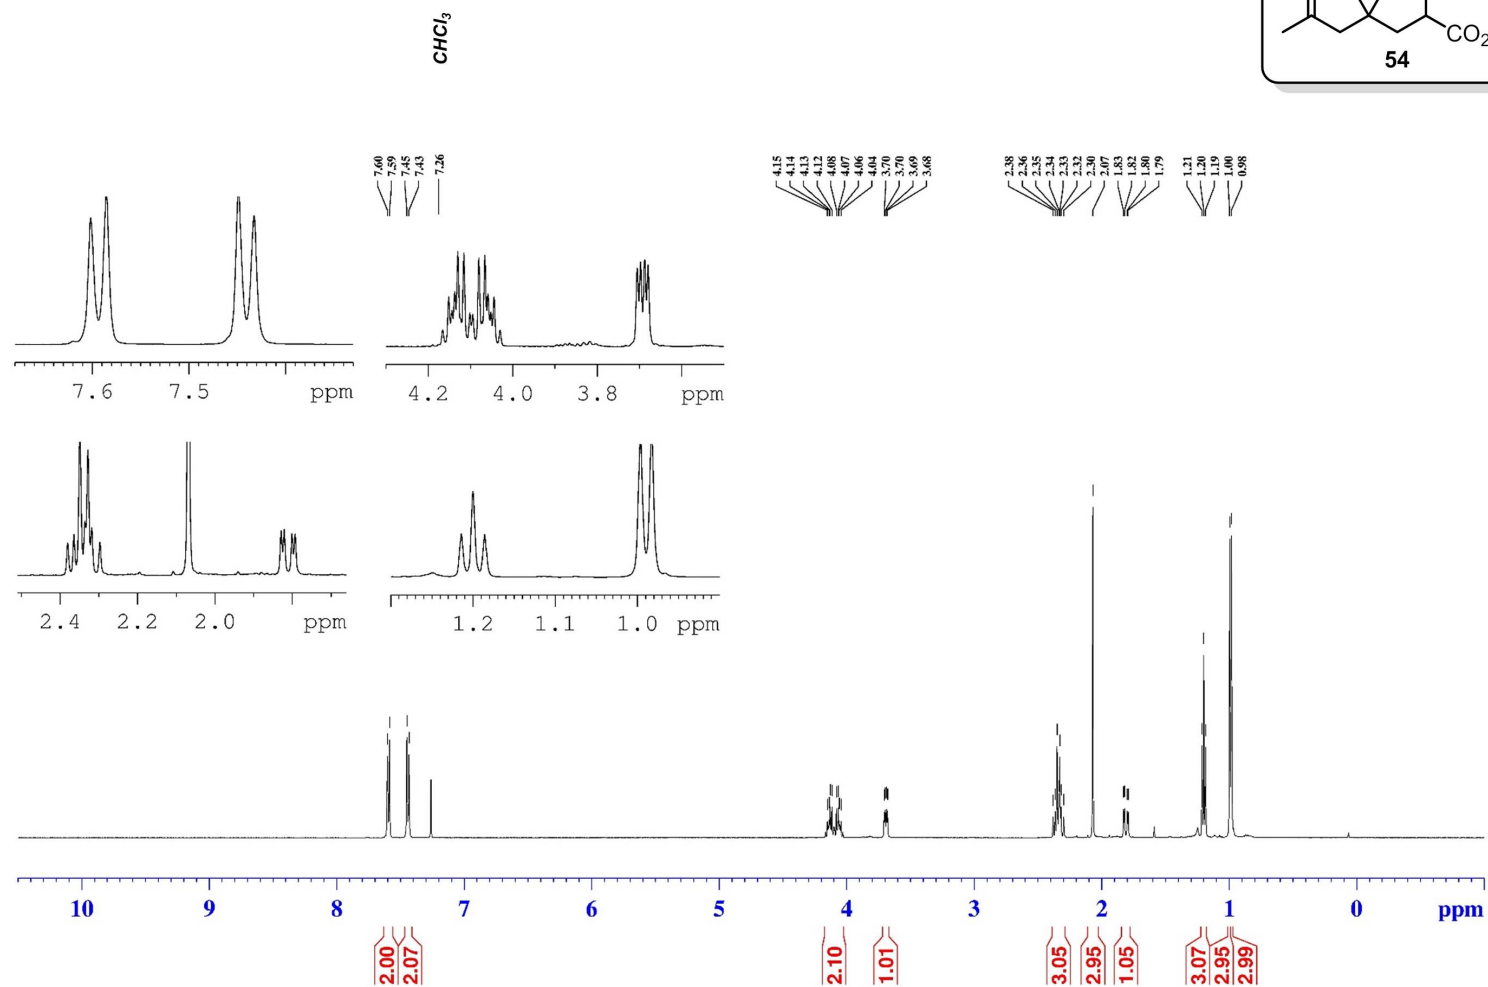

Ethyl 2-(4-cyanophenyl)-4,4-dimethyl-6-oxoheptanoate  
125 MHz, CDCl<sub>3</sub>

<sup>13</sup>C NMR

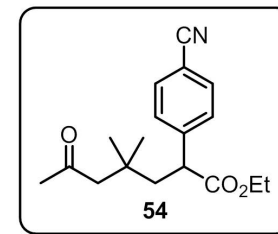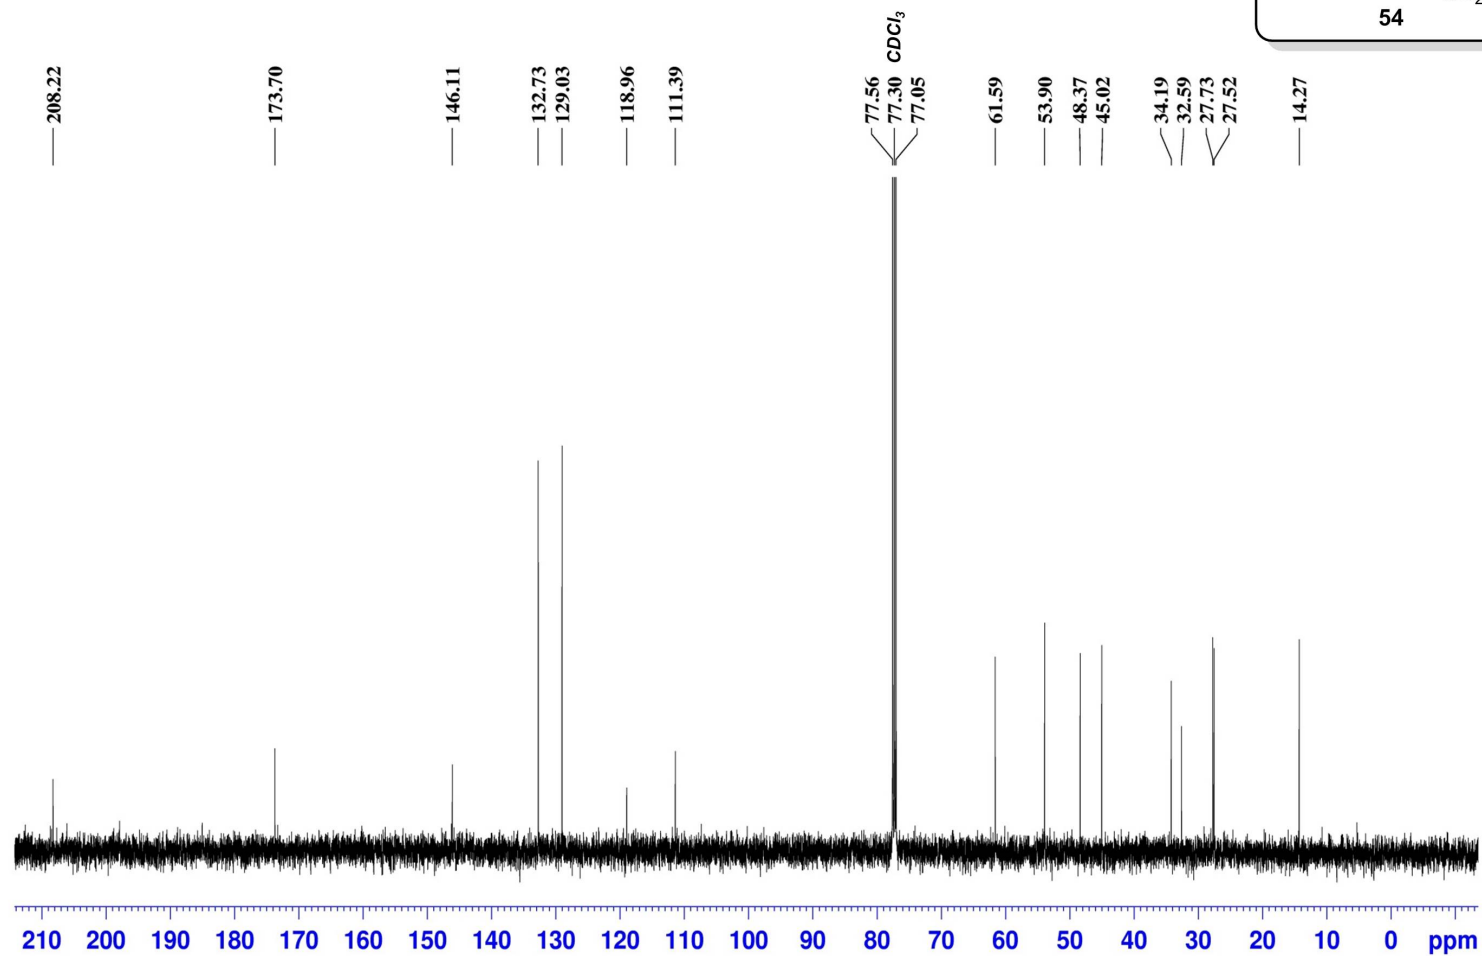

**<sup>1</sup>H NMR**

4-(2-cyclohexyl-1-(4,4,5,5-tetramethyl-1,3,2-dioxaborolan-2-yl)ethyl)benzonitrile  
500 MHz, CDCl<sub>3</sub>

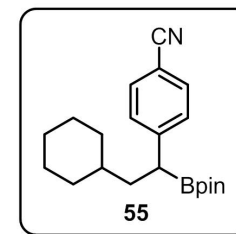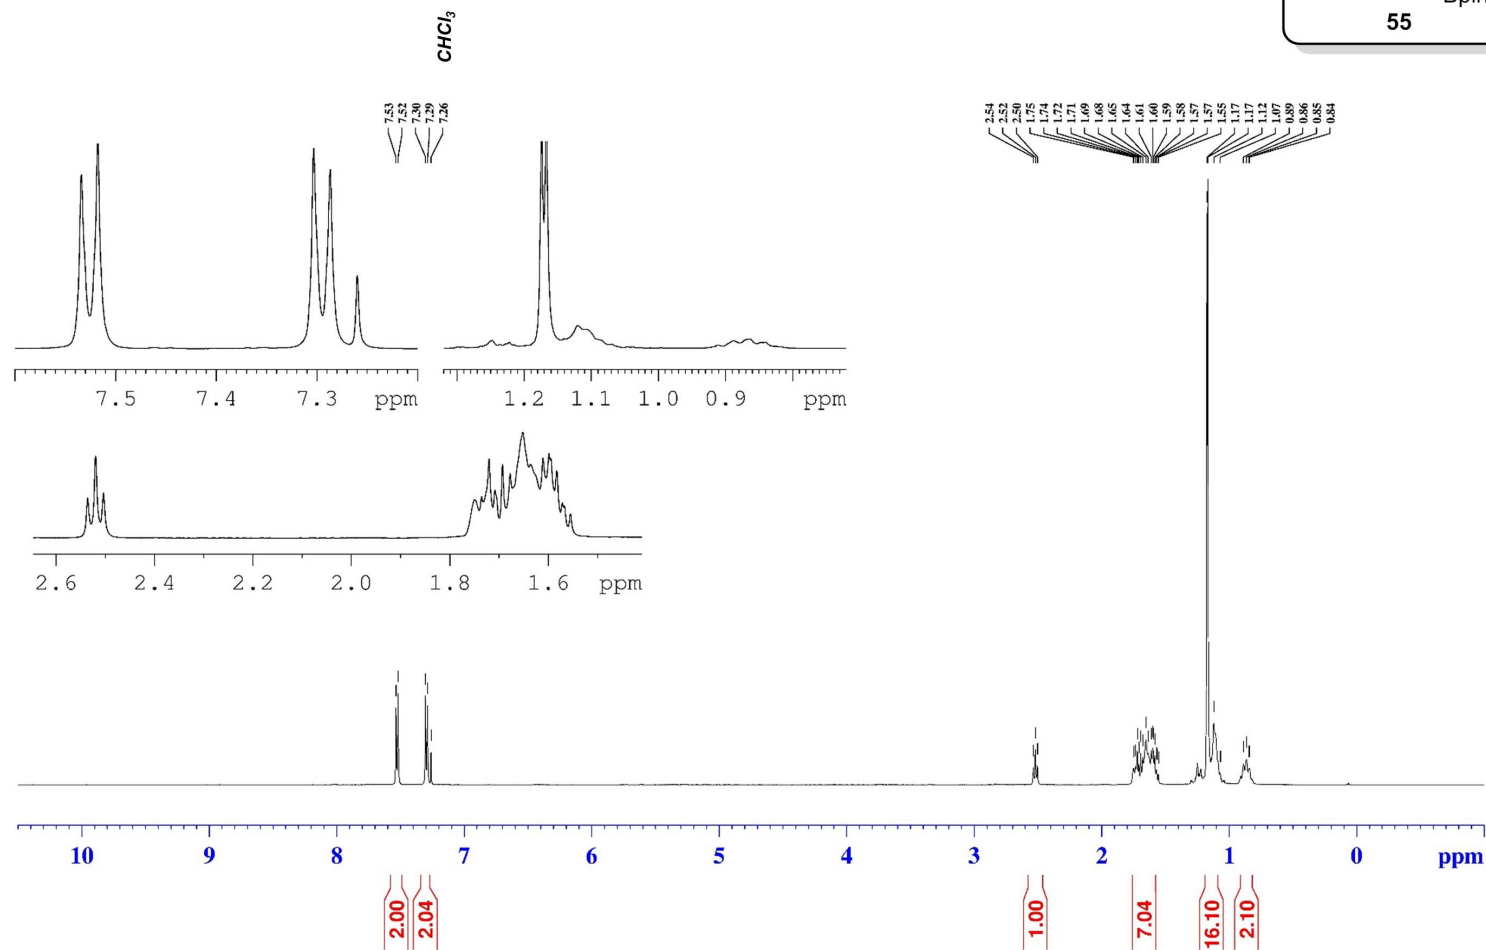

S307

**<sup>13</sup>C NMR**

4-(2-Cyclohexyl-1-(4,4,5,5-tetramethyl-1,3,2-dioxaborolan-2-yl)ethyl) benzonitrile  
125 MHz, CDCl<sub>3</sub>

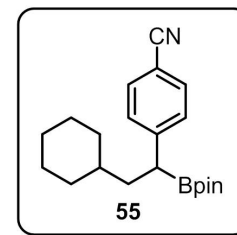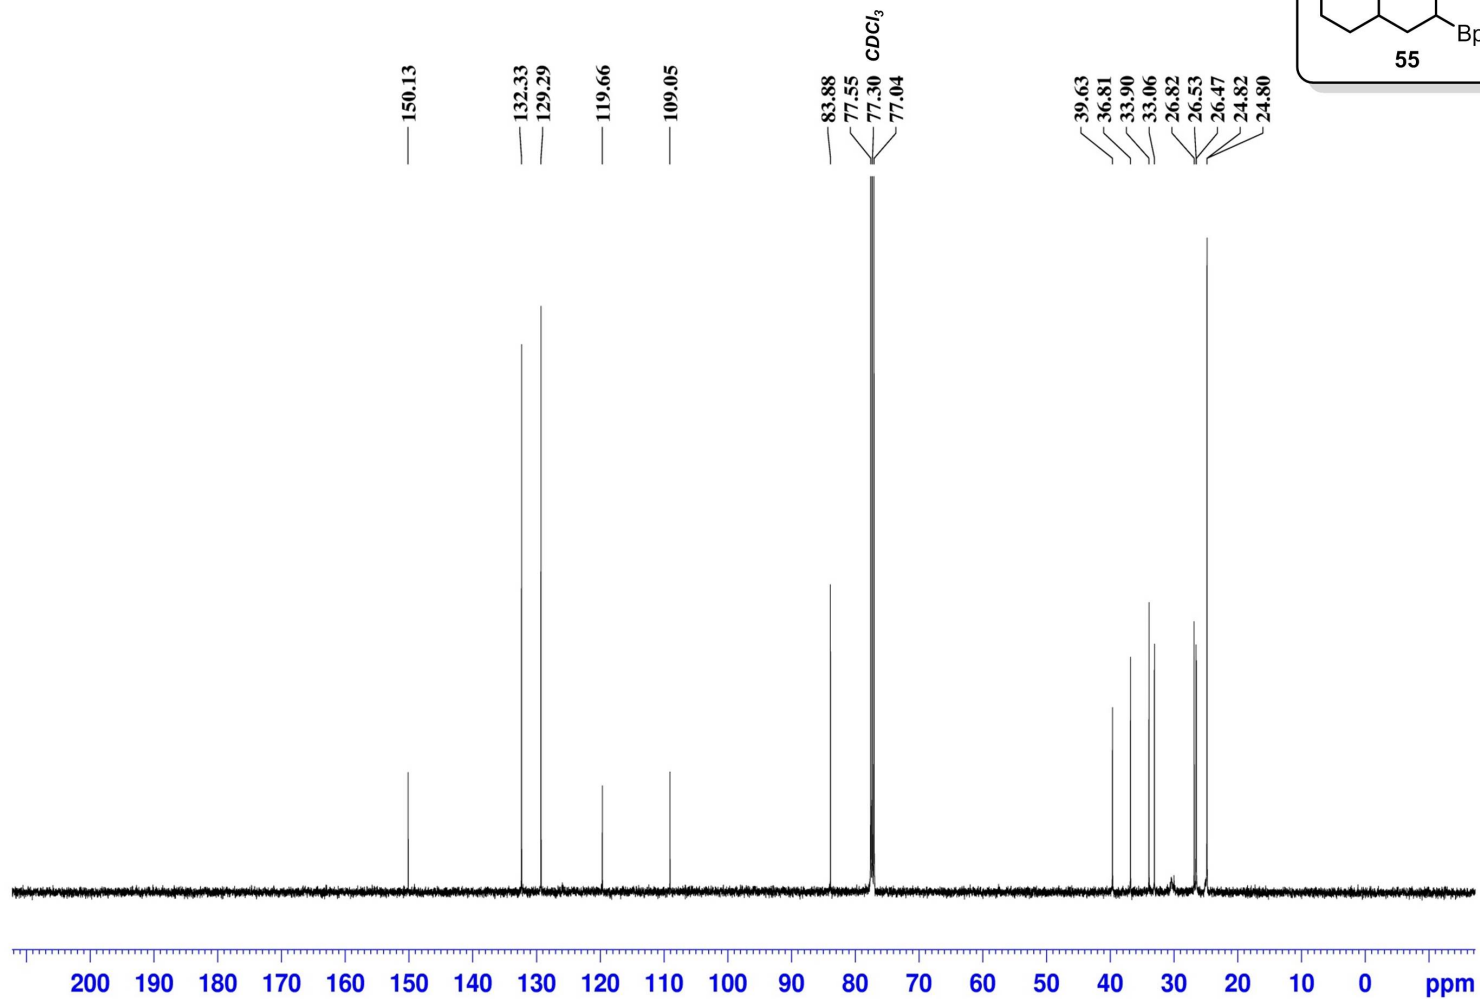

**<sup>11</sup>B NMR**

4-(2-cyclohexyl-1-(4,4,5,5-tetramethyl-1,3,2-dioxaborolan-2-yl)ethyl) benzonitrile  
128 MHz, CDCl<sub>3</sub>

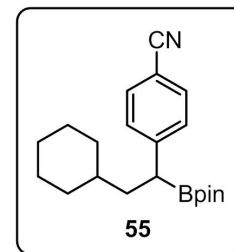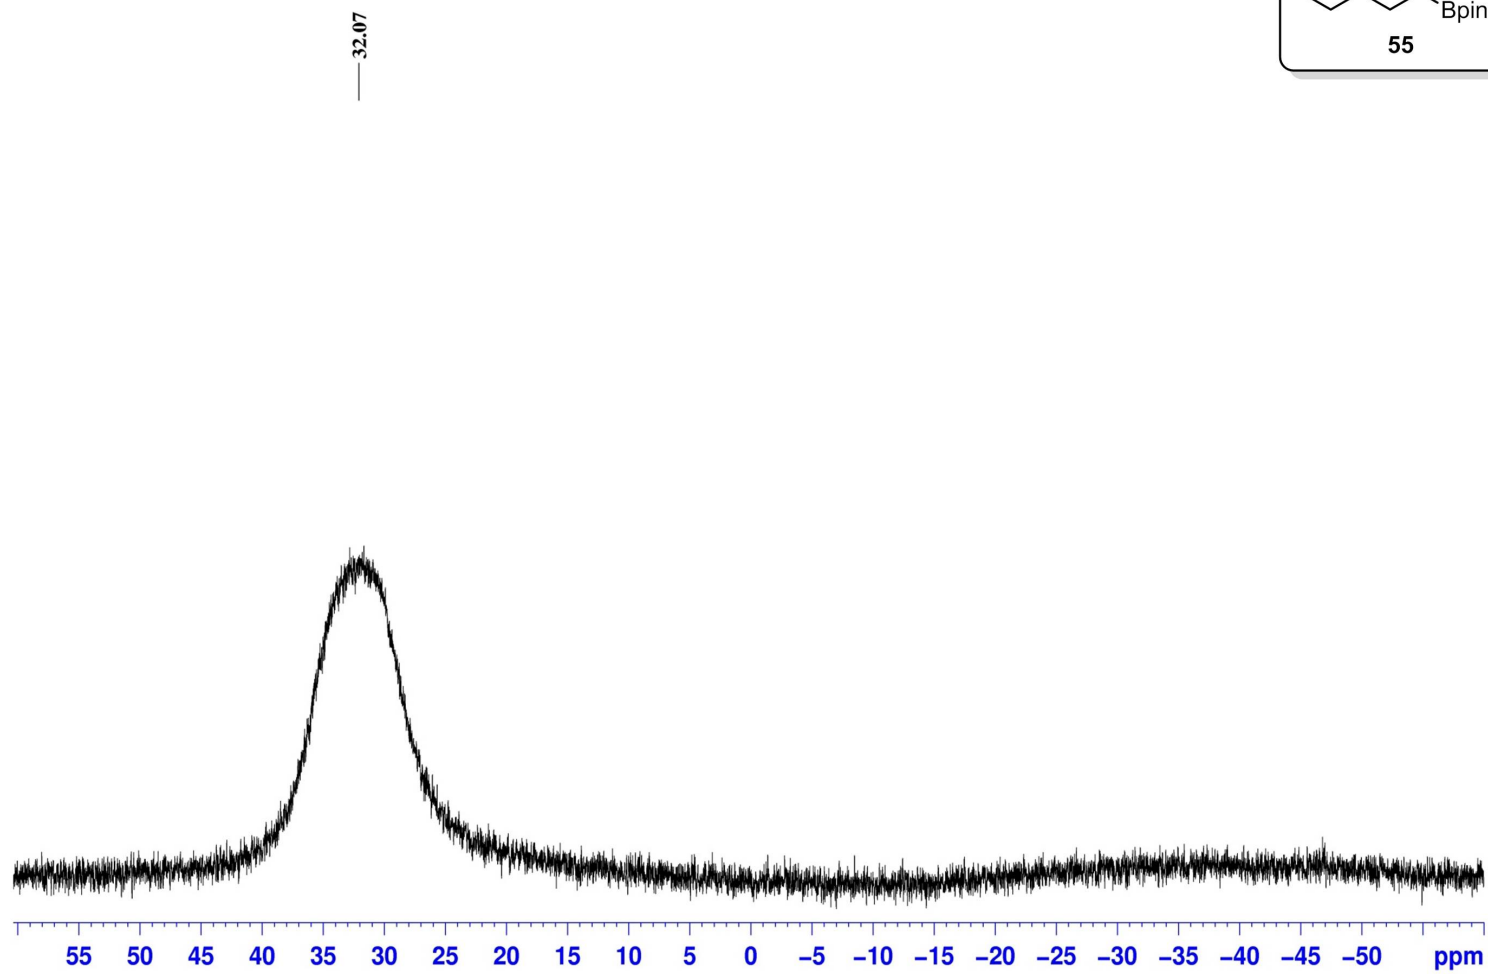

S309

**<sup>1</sup>H NMR**

**4-(3-Methyl-1-(4,4,5,5-tetramethyl-1,3,2-dioxaborolan-2-yl)pentyl)benzonitrile**  
500 MHz, CDCl<sub>3</sub>

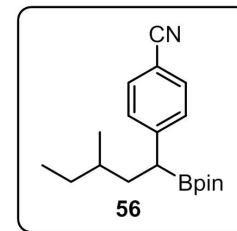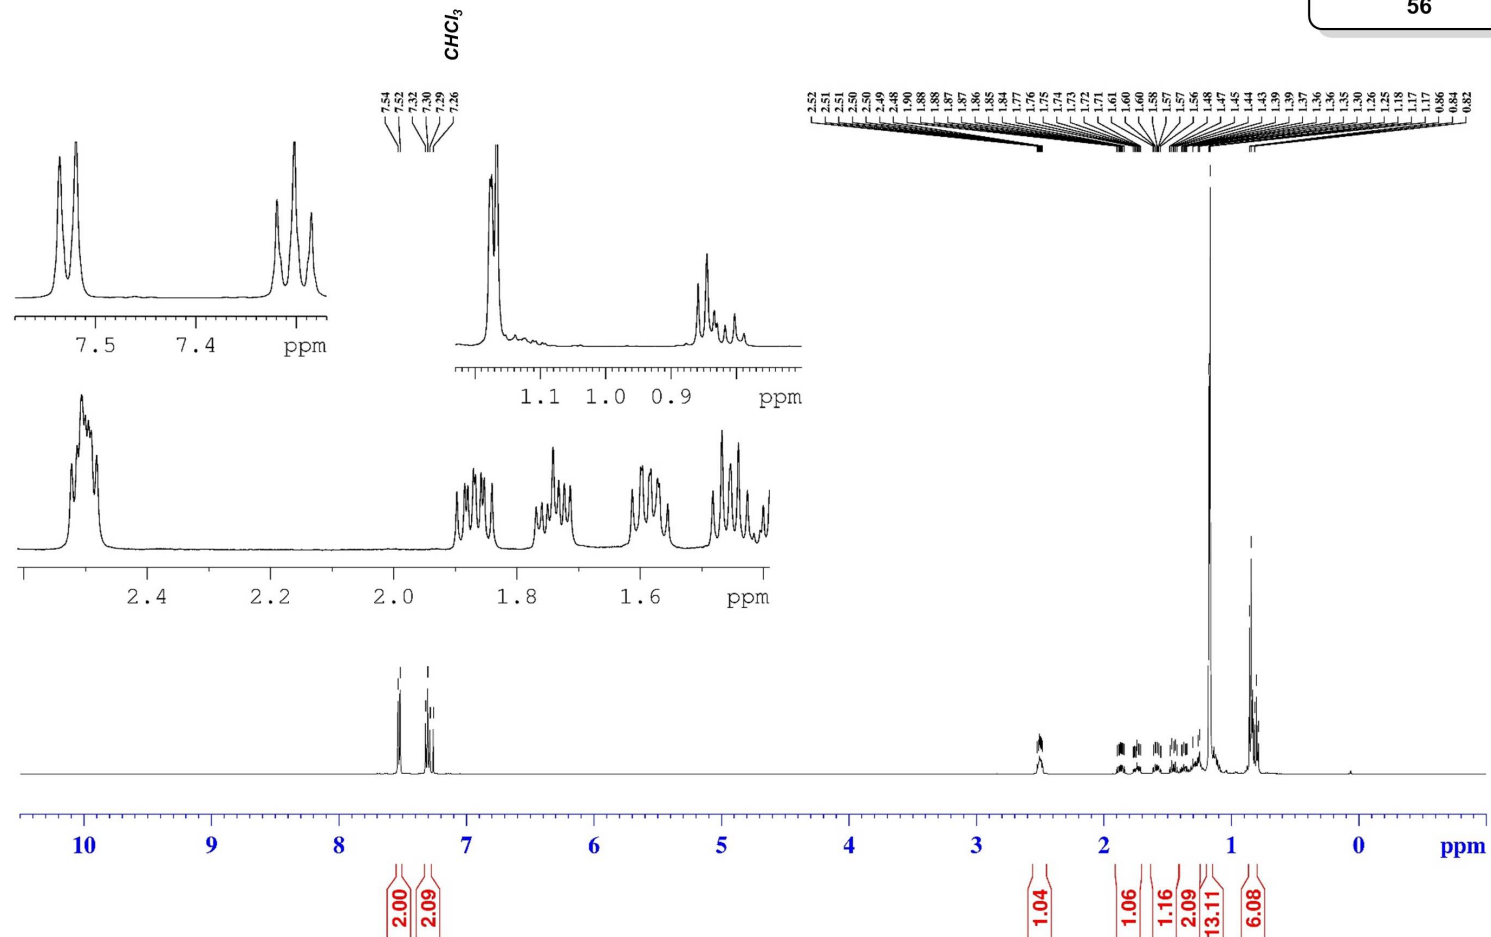

**<sup>13</sup>C NMR**

4-(3-Methyl-1-(4,4,5,5-tetramethyl-1,3,2-dioxaborolan-2-yl)pentyl) benzonitrile,  
125 MHz,, CDCl<sub>3</sub>

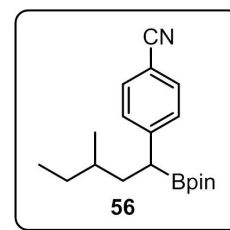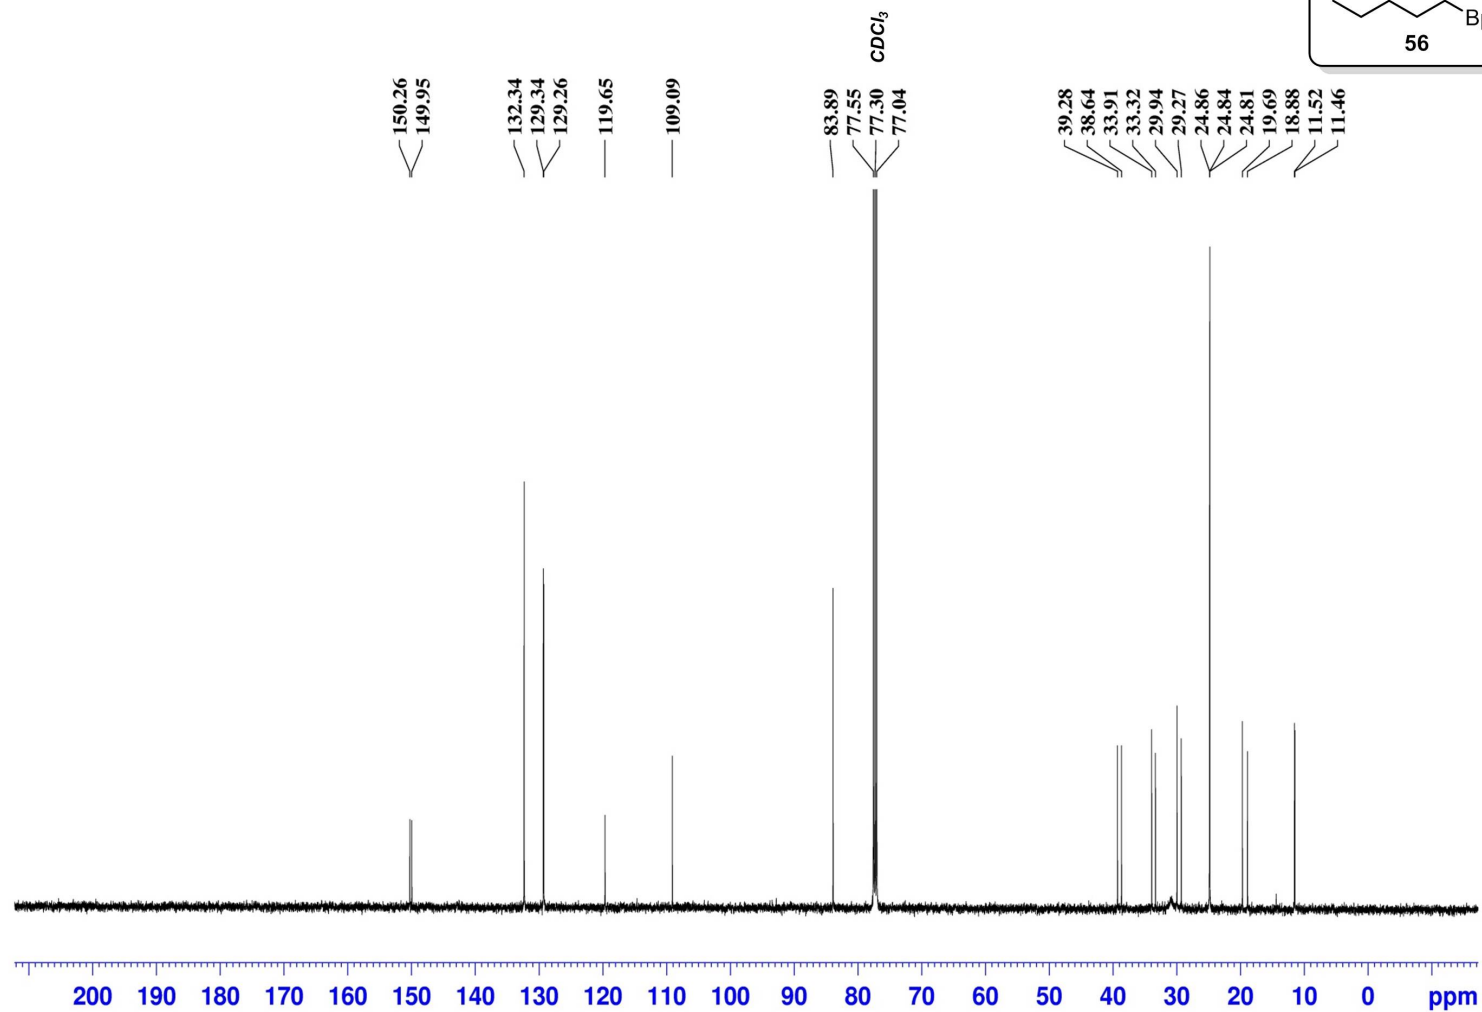

**<sup>11</sup>B NMR**

4-(3-methyl-1-(4,4,5,5-tetramethyl-1,3,2-dioxaborolan-2-yl)pentyl) benzonitrile,  
500 MHz, CDCl<sub>3</sub>

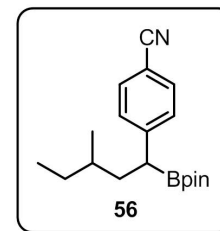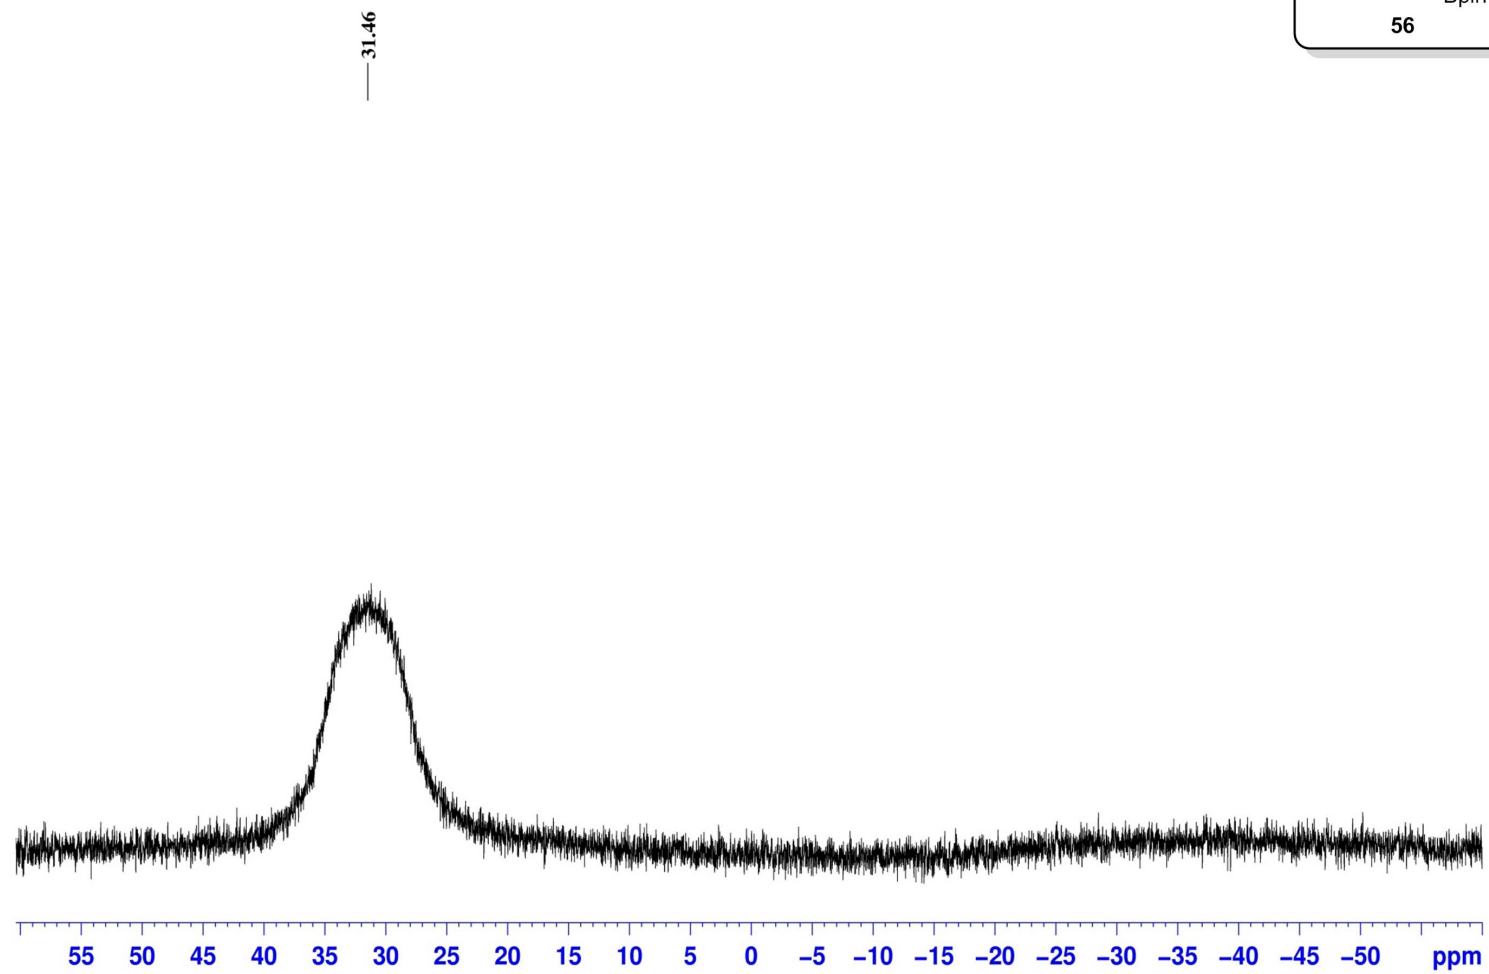



# <sup>1</sup>H NMR

4-(2-(tetrahydro-2H-pyran-4-yl)-1-(4,4,5,5-tetramethyl-1,3,2-dioxaborolan-2-yl)ethyl)benzonitrile  
500 MHz, CDCl<sub>3</sub>

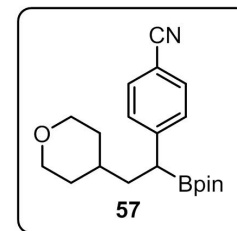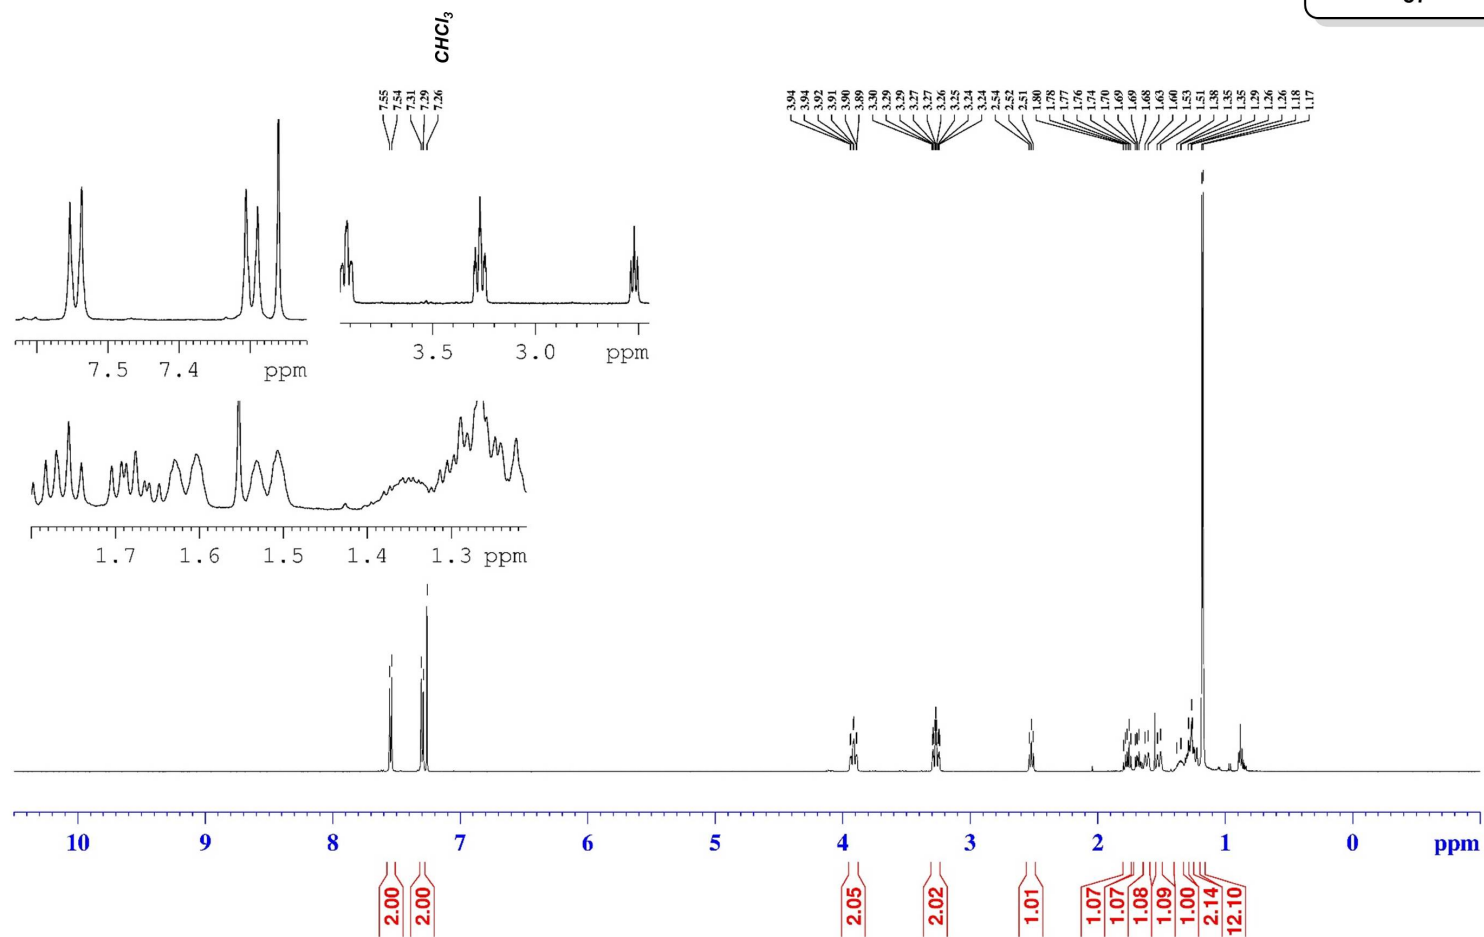

S313

**<sup>13</sup>C NMR**

4-(2-(tetrahydro-2H-pyran-4-yl)-1-(4,4,5,5-tetramethyl-1,3,2-dioxaborolan-2-yl)ethyl)benzonitrile,  
125 MHz, CDCl<sub>3</sub>

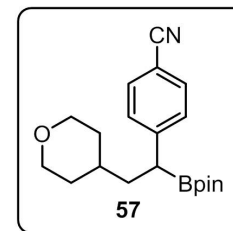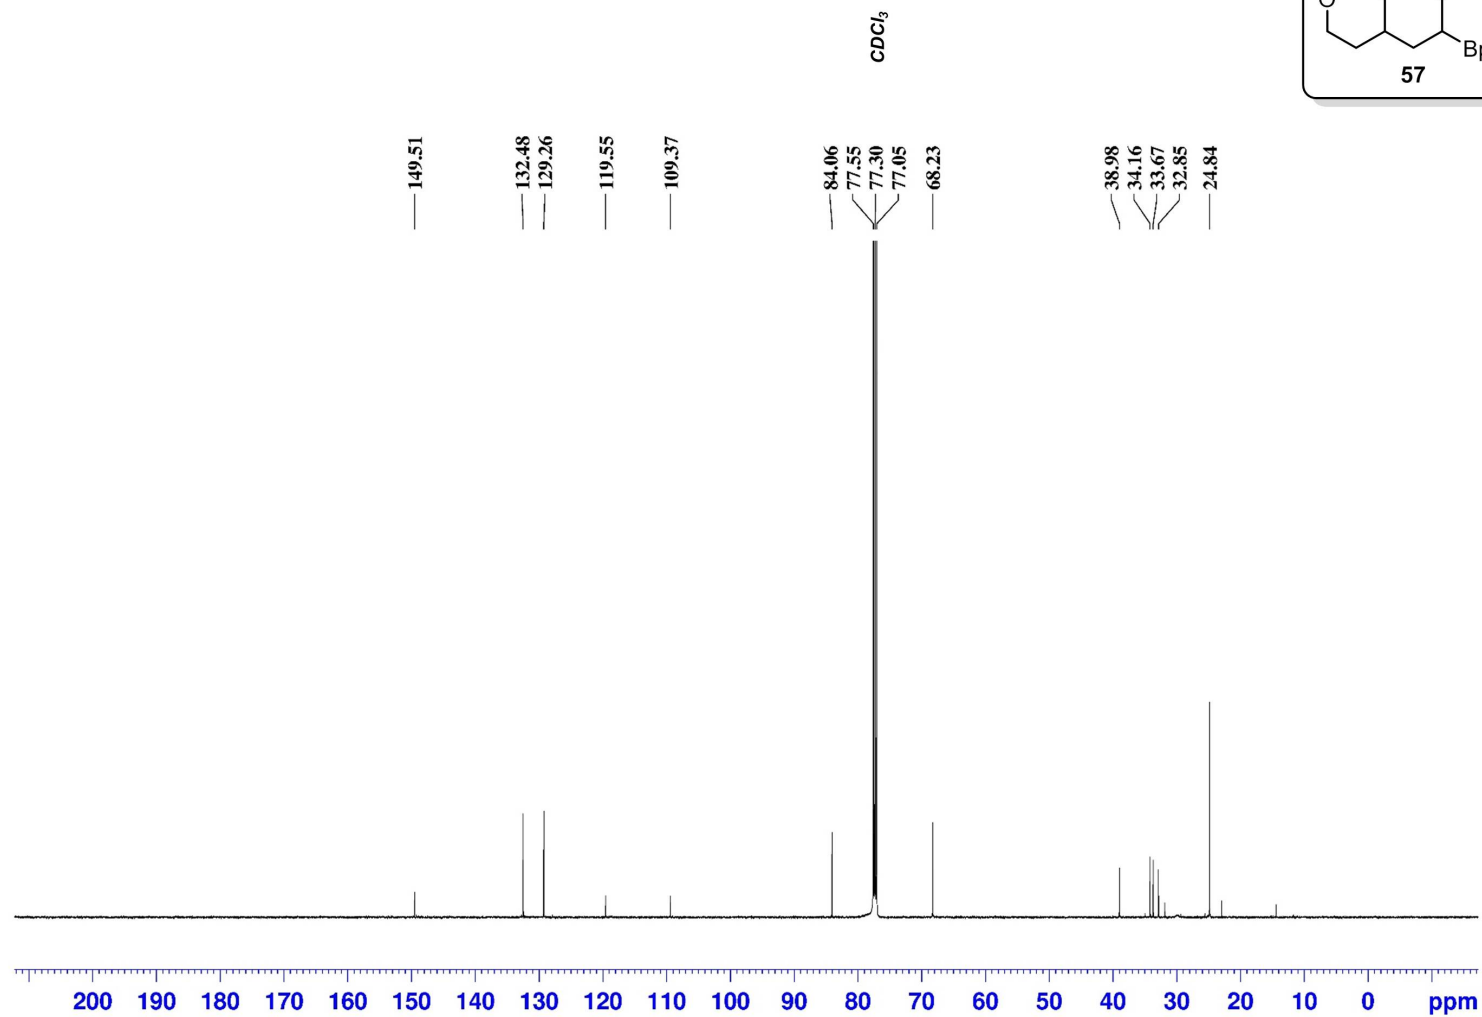

**<sup>11</sup>B NMR**

4-(2-(tetrahydro-2H-pyran-4-yl)-1-(4,4,5,5-tetramethyl-1,3,2-dioxaborolan-2-yl)ethyl)benzonitrile,  
500 MHz, CDCl<sub>3</sub>

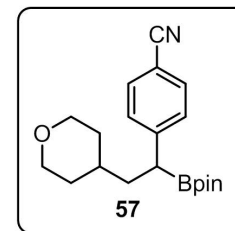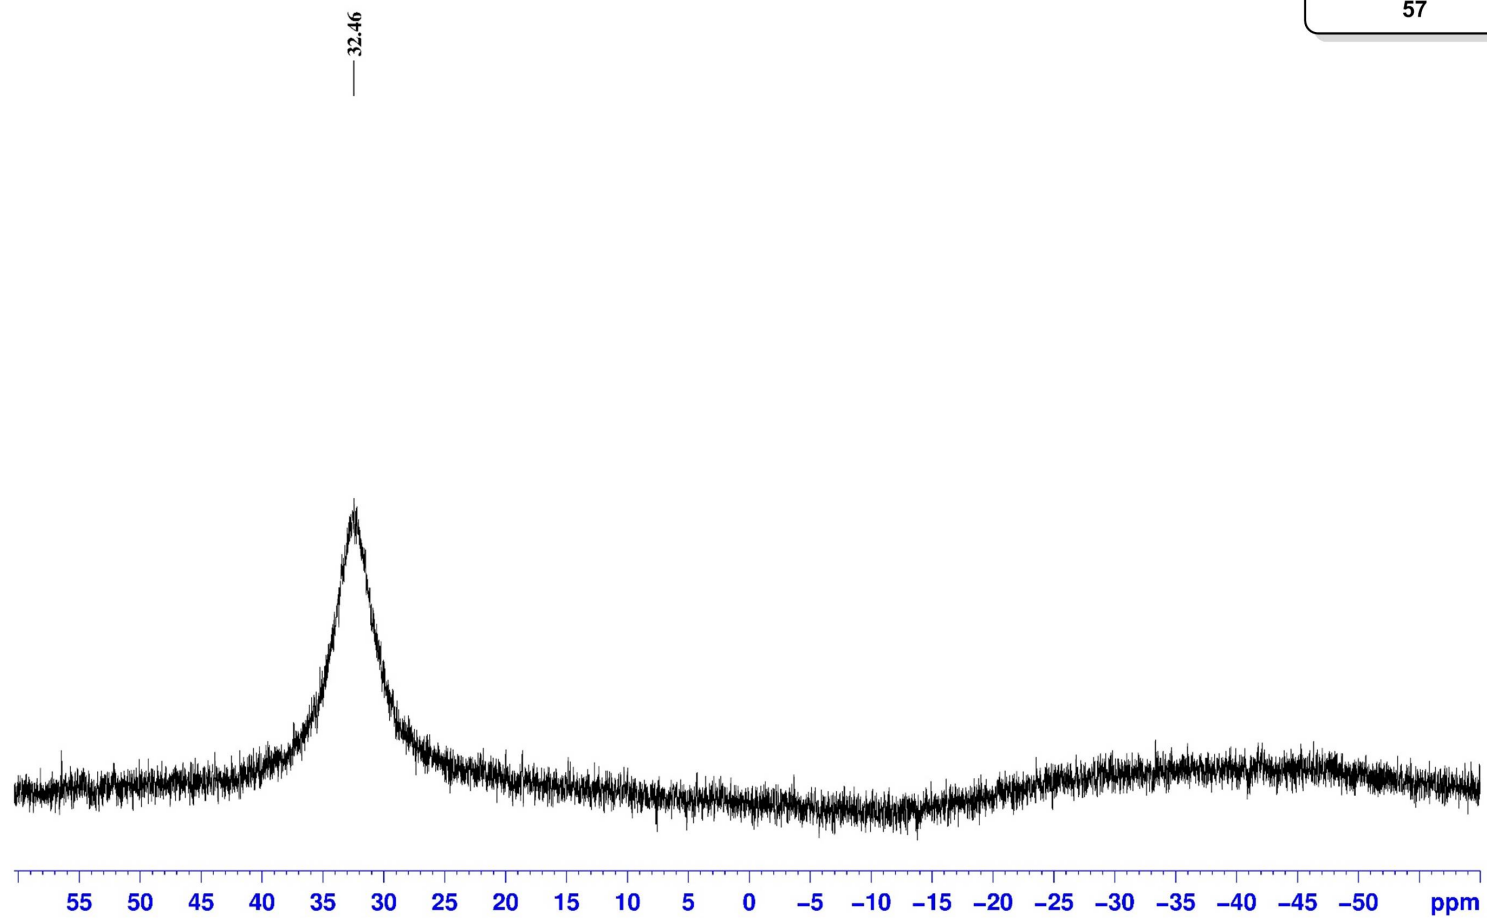

# <sup>1</sup>H NMR

*Tert*-butyl 4-(2-(4-cyanophenyl)-2-(4,4,5,5-tetramethyl-1,3,2-dioxaborolan-2-yl)ethyl)piperidine-1-carboxylate  
500 MHz, CDCl<sub>3</sub>

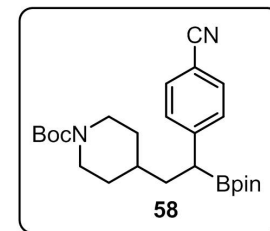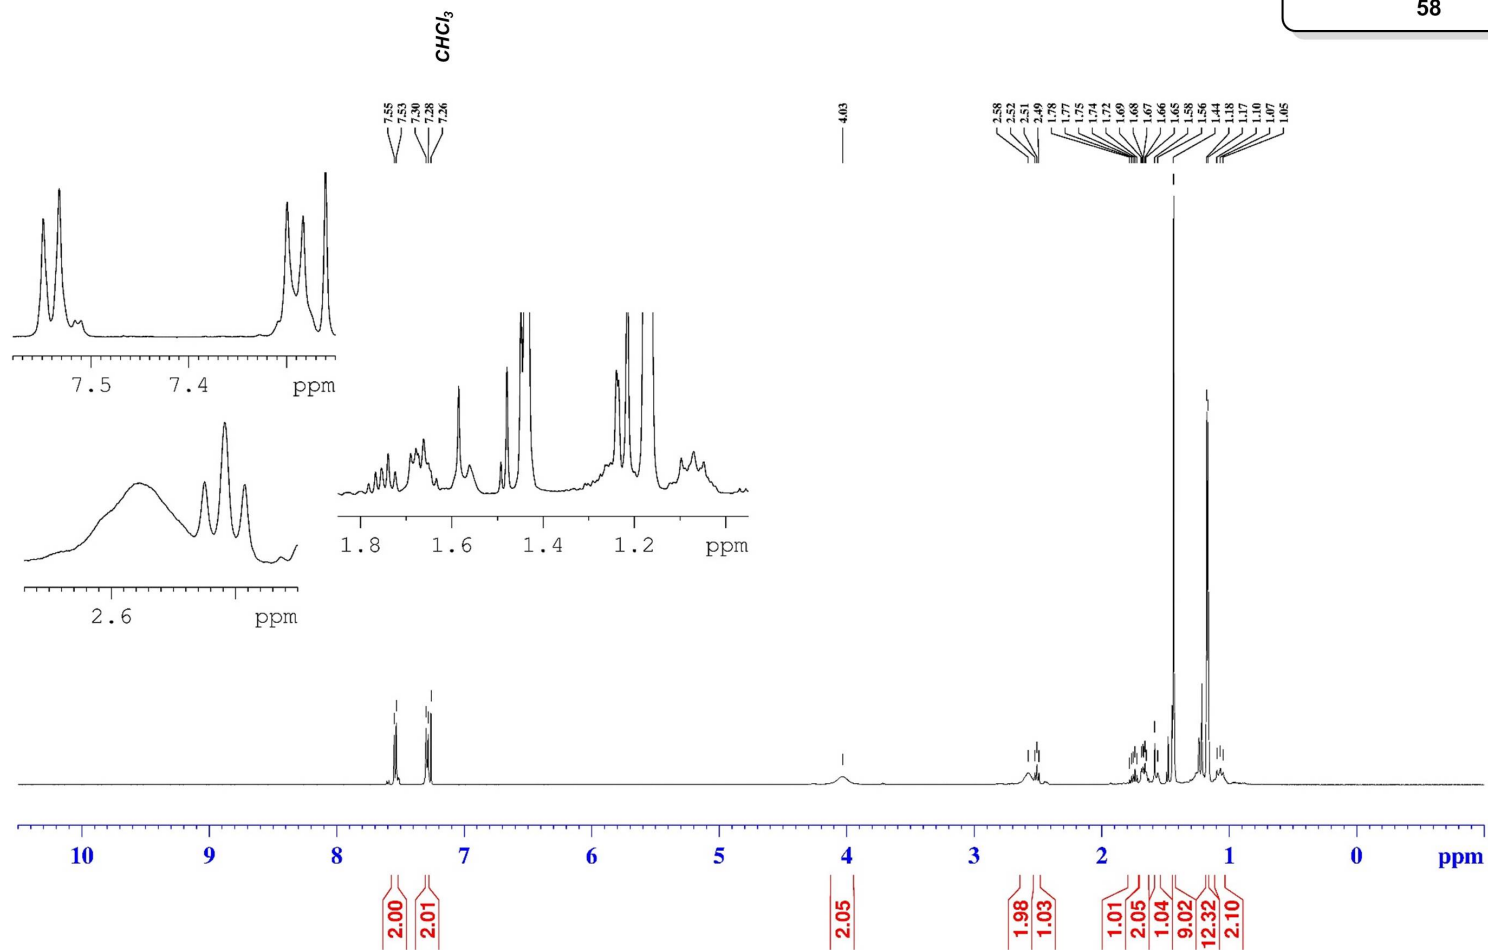

**<sup>13</sup>C NMR**

*Tert*-butyl 4-(2-(4-cyanophenyl)-2-(4,4,5,5-tetramethyl-1,3,2-dioxaborolan-2-yl)ethyl)piperidine-1-carboxylate,  
125 MHz,, CDCl<sub>3</sub>

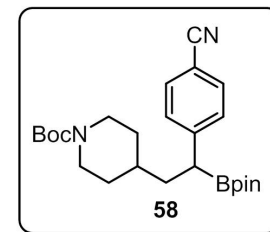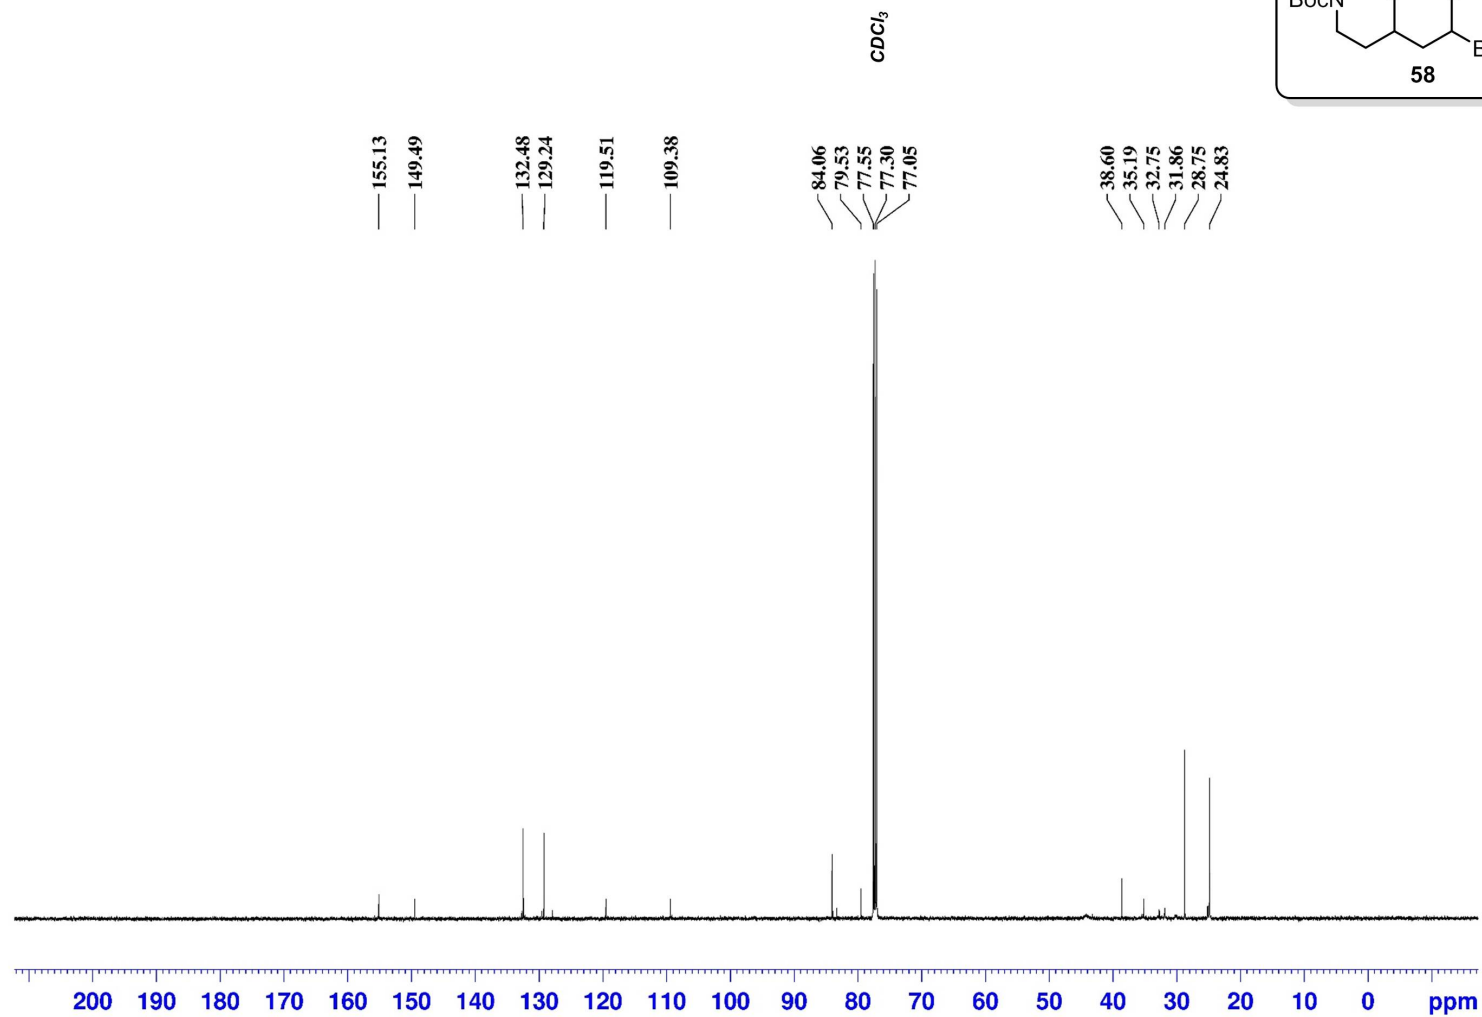

# <sup>11</sup>B NMR

*Tert*-butyl 4-(2-(4-cyanophenyl)-2-(4,4,5,5-tetramethyl-1,3,2-dioxaborolan-2-yl)ethyl)piperidine-1-carboxylate,  
500 MHz, CDCl<sub>3</sub>

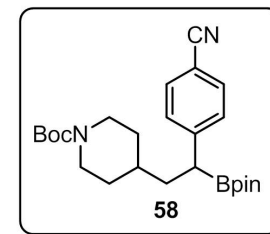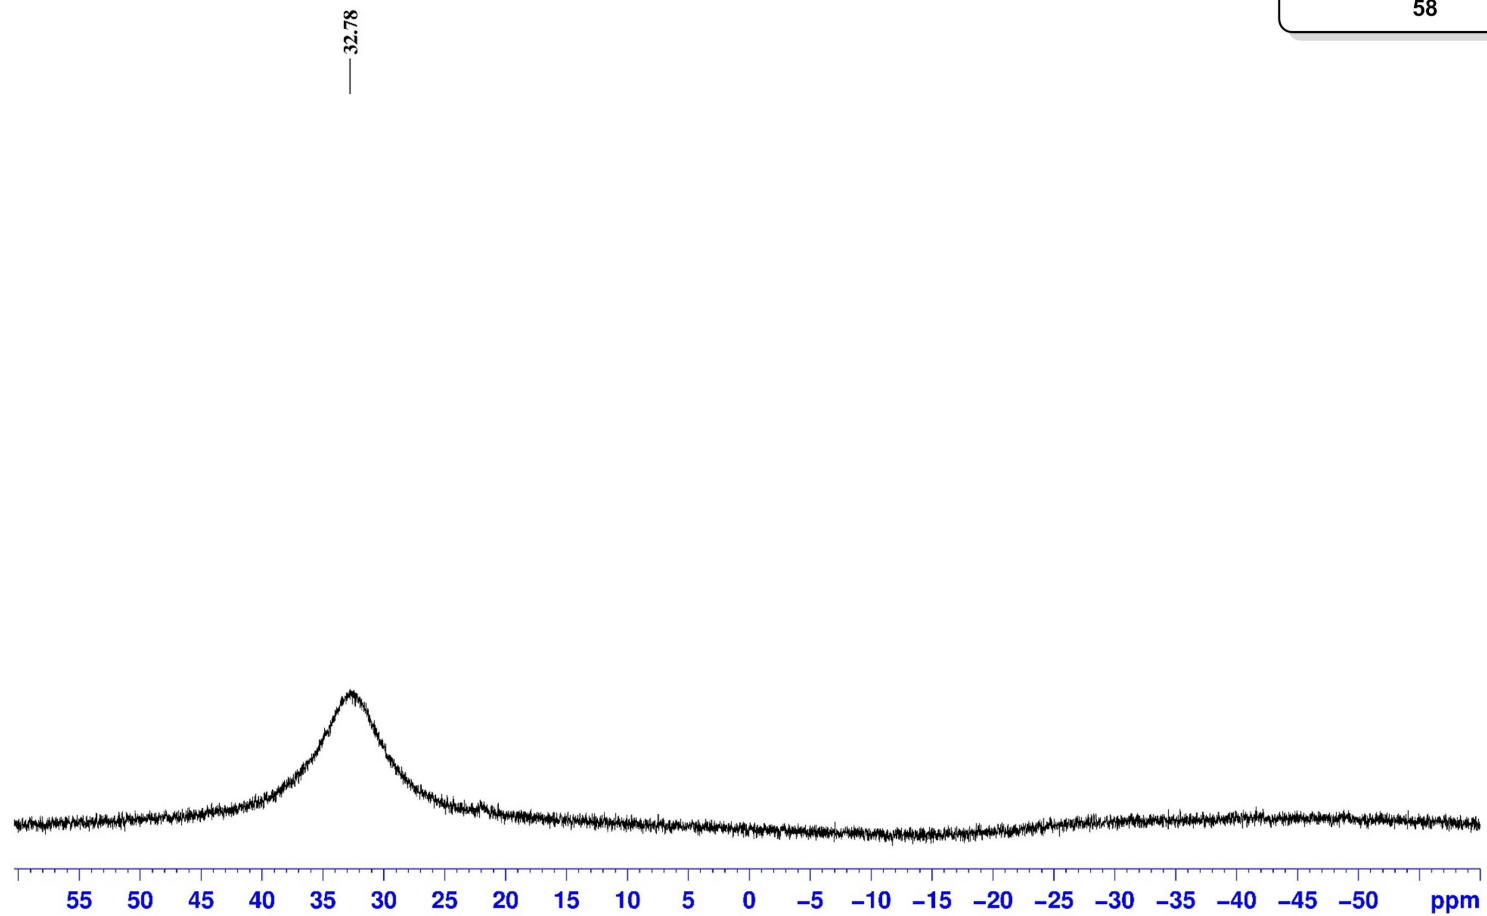

# <sup>1</sup>H NMR

4-(2-(2-methylcyclopentyl)-1-(4,4,5,5-tetramethyl-1,3,2-dioxaborolan-2-yl)ethyl)benzonitrile  
500 MHz, CDCl<sub>3</sub>

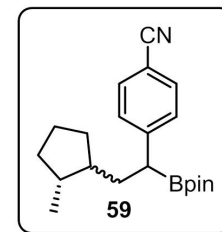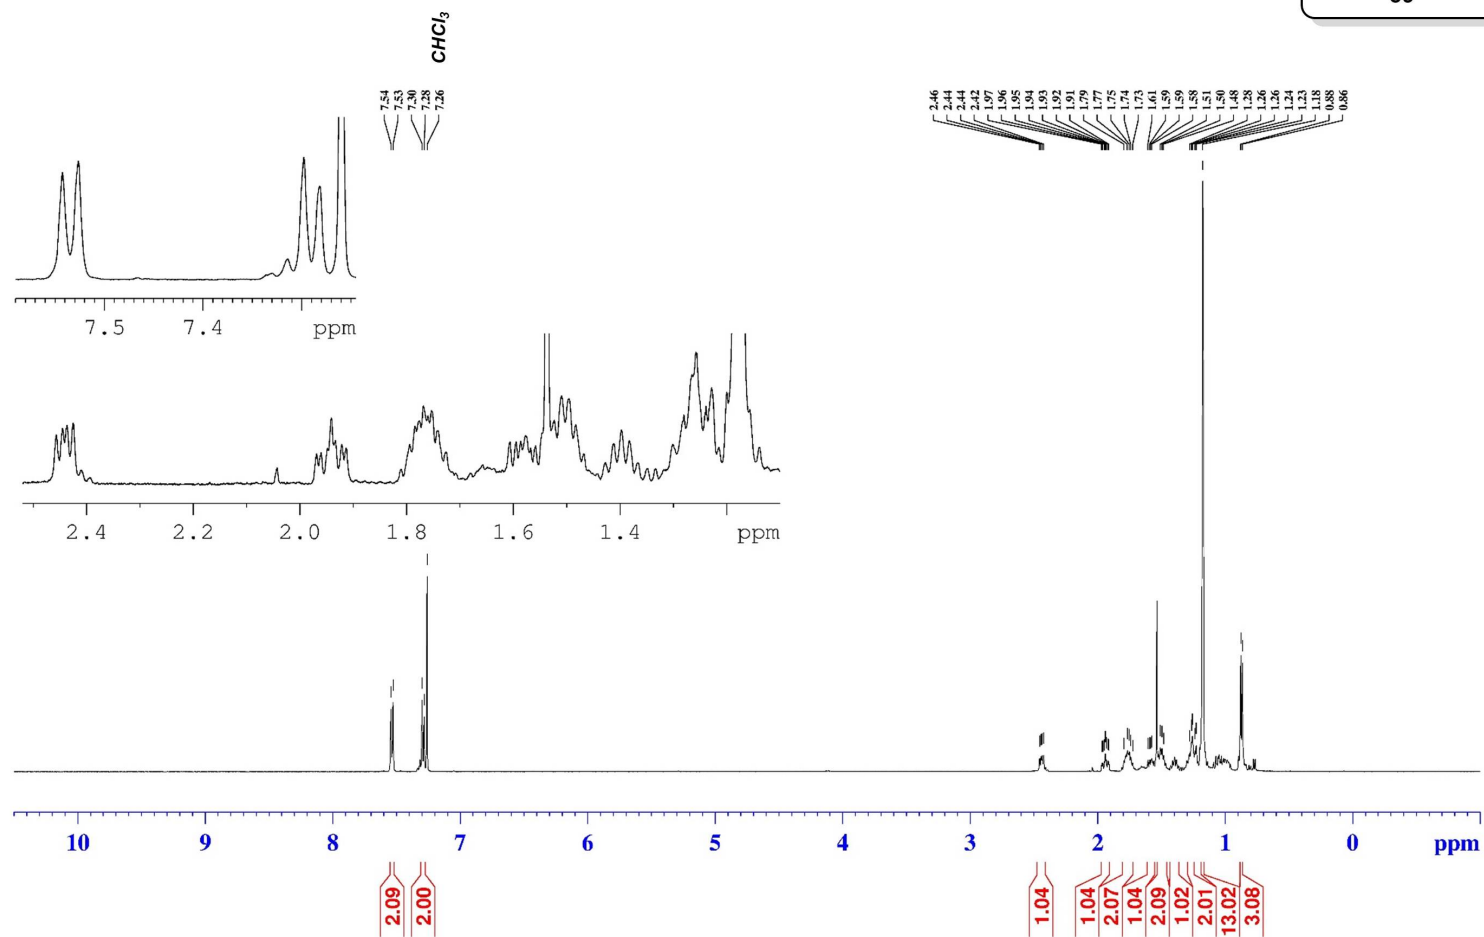

**<sup>13</sup>C NMR**

4-(2-(2-methylcyclopentyl)-1-(4,4,5,5-tetramethyl-1,3,2-dioxaborolan-2-yl)ethyl)benzonitrile,  
125 MHz, CDCl<sub>3</sub>

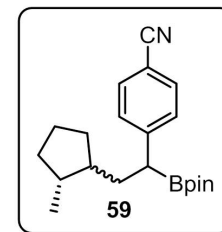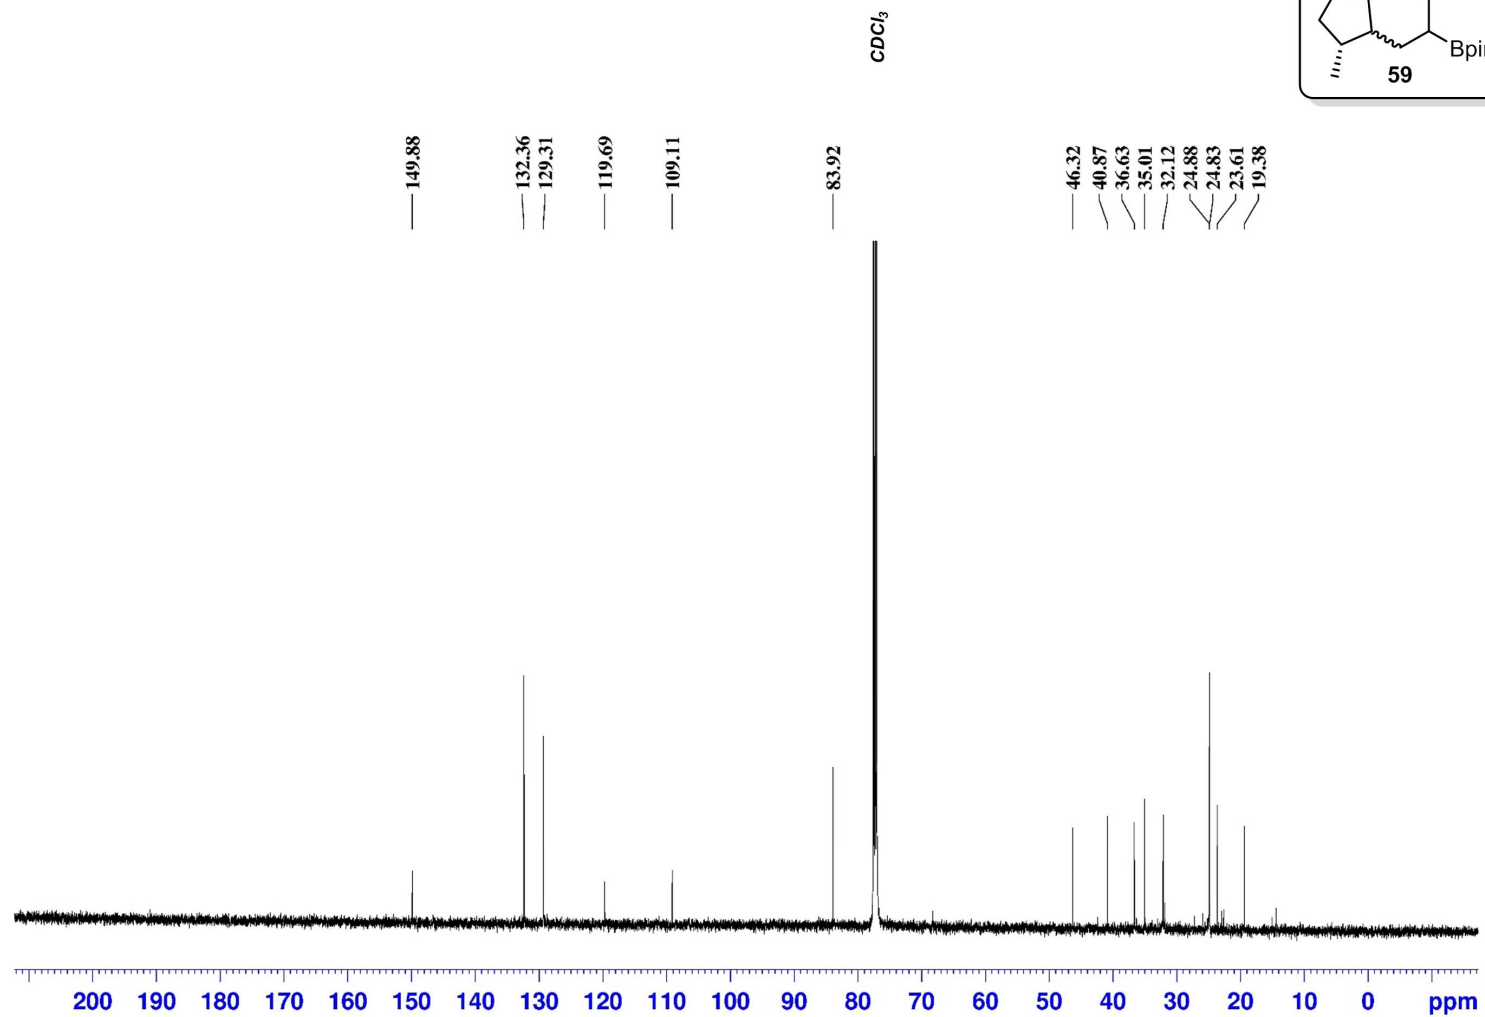



**<sup>11</sup>B NMR**

4-(2-(2-methylcyclopentyl)-1-(4,4,5,5-tetramethyl-1,3,2-dioxaborolan-2-yl)ethyl)benzonitrile,  
500 MHz, CDCl<sub>3</sub>

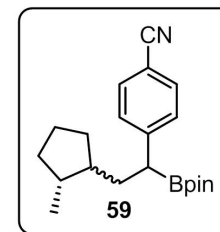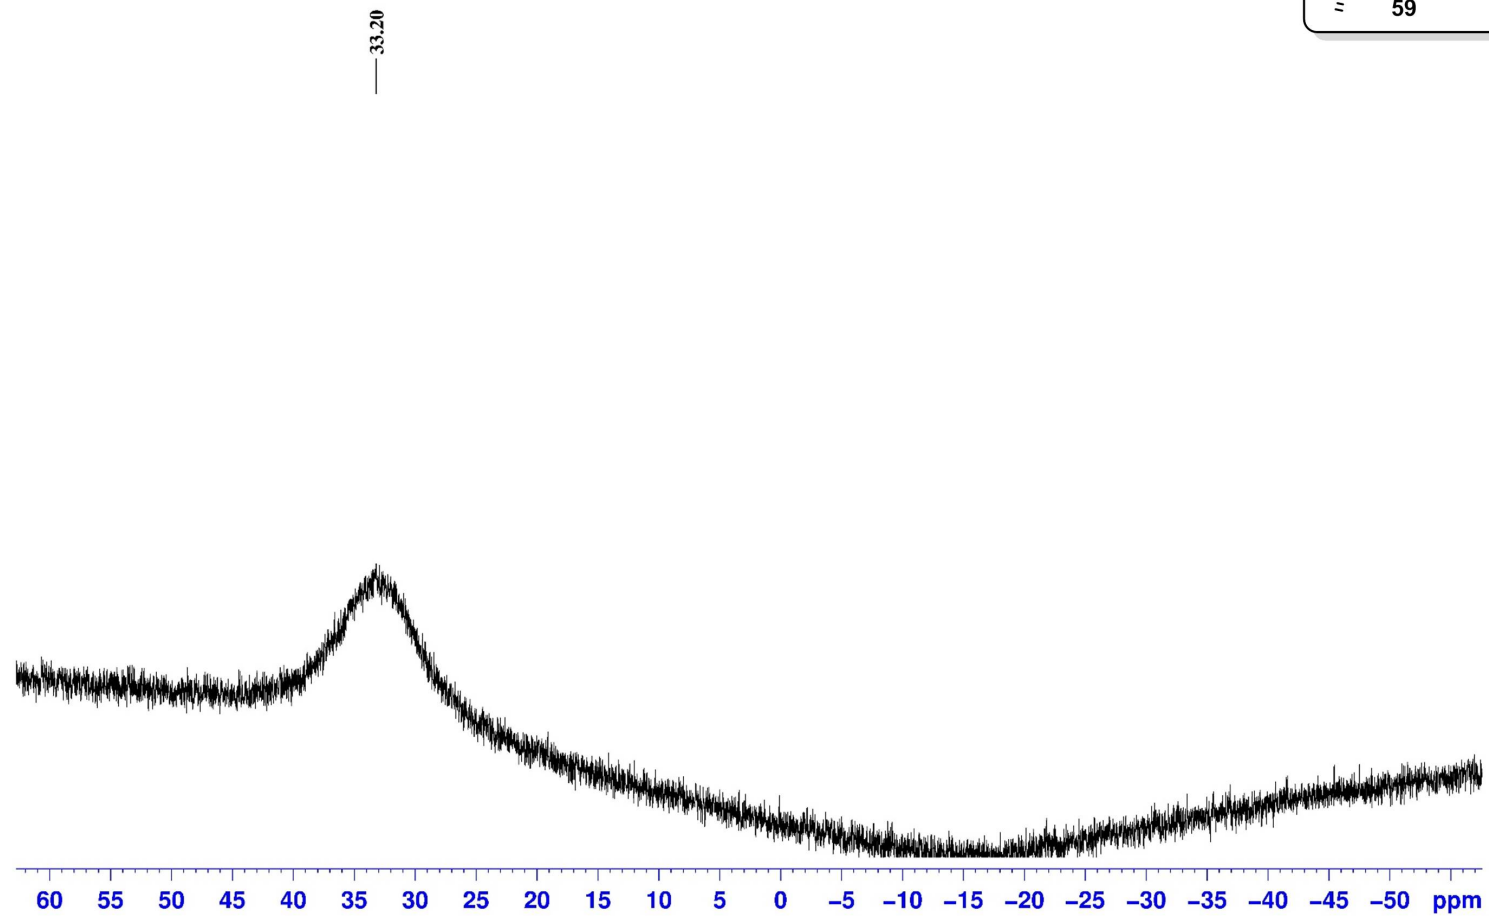

S321

# <sup>1</sup>H NMR

4-(2-(bicyclo[2.2.1]heptan-2-yl)-1-(4,4,5,5-tetramethyl-1,3,2-dioxaborolan-2-yl)ethyl)benzonitrile  
500 MHz, CDCl<sub>3</sub>

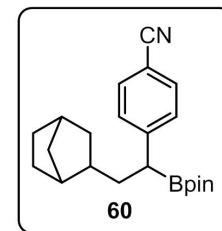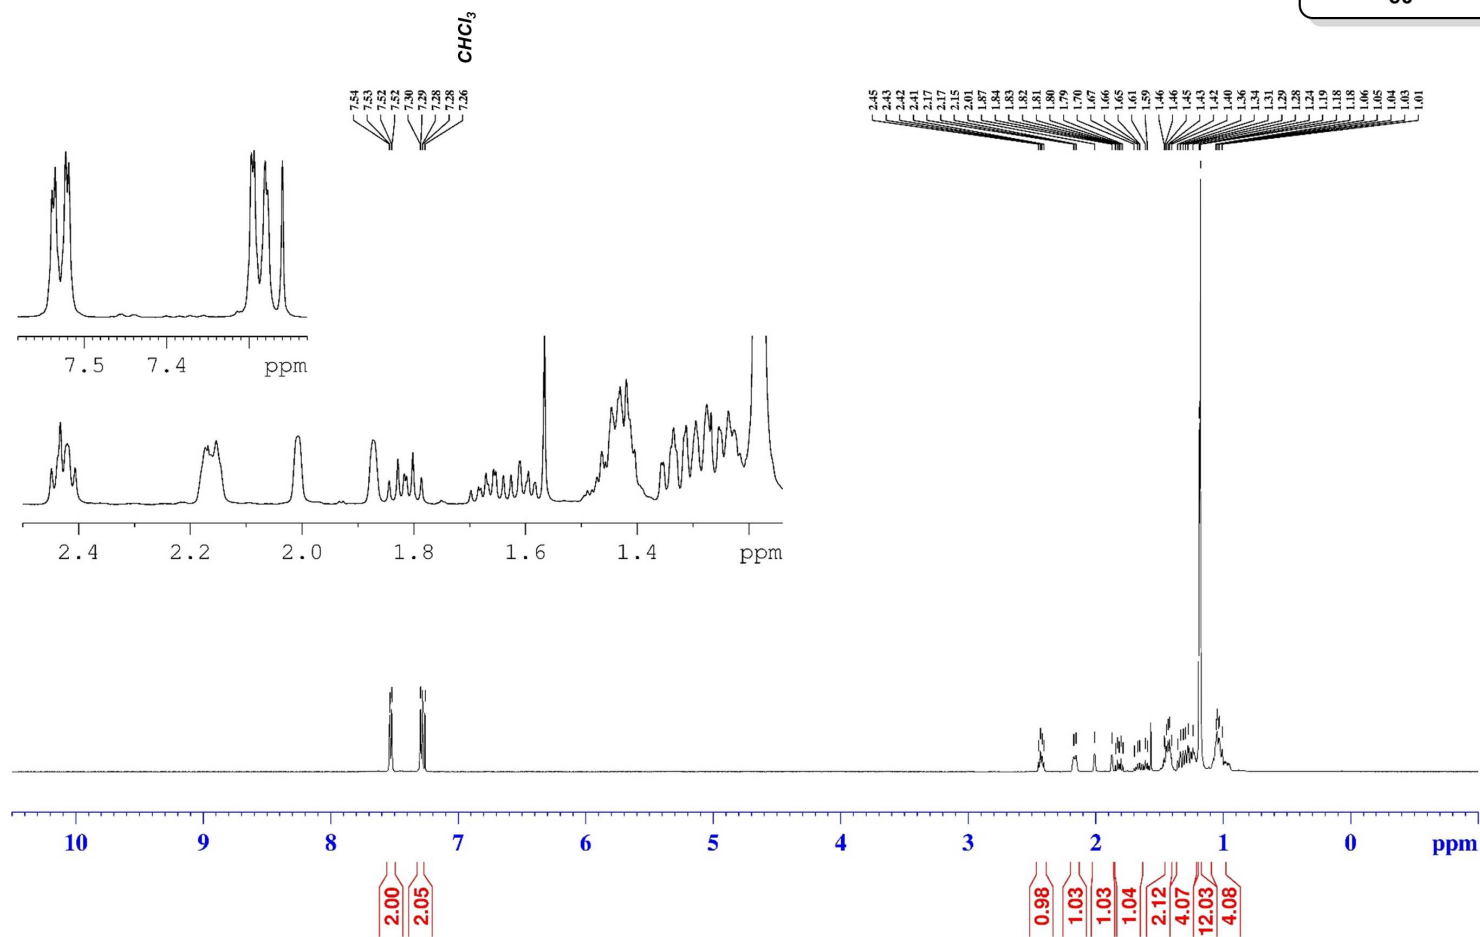

S322

**<sup>13</sup>C NMR**

4-(2-(bicyclo[2.2.1]heptan-2-yl)-1-(4,4,5,5-tetramethyl-1,3,2-dioxaborolan-2-yl)ethyl)benzonitrile,  
125 MHz,, CDCl<sub>3</sub>

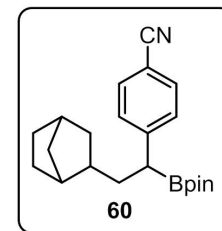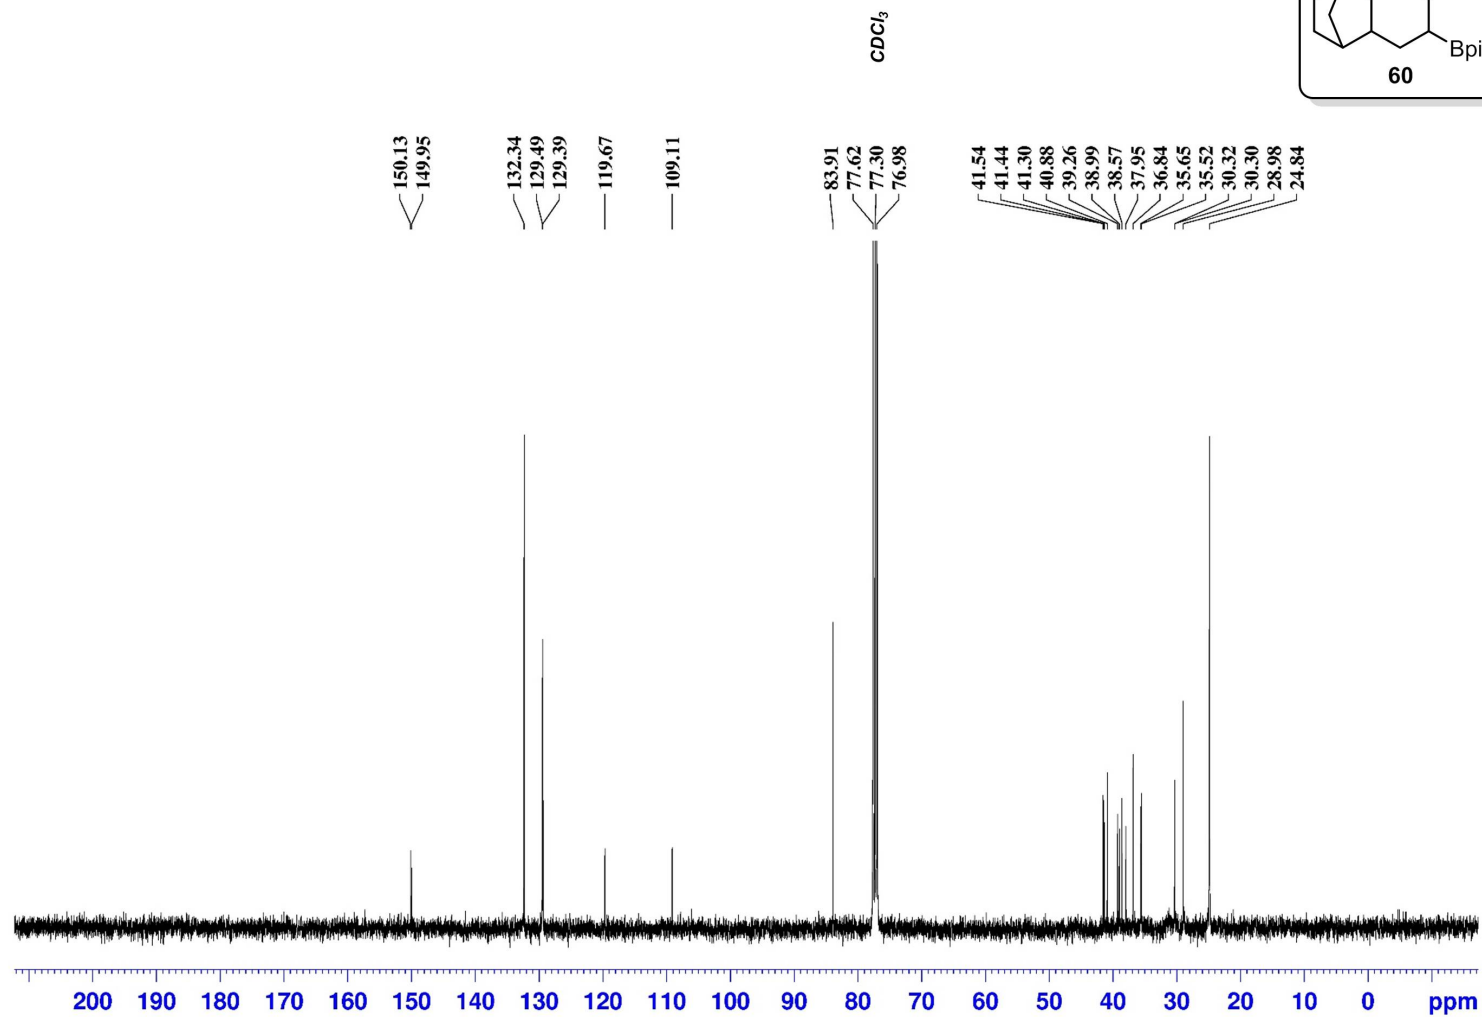

**<sup>11</sup>B NMR**

4-(2-(bicyclo[2.2.1]heptan-2-yl)-1-(4,4,5,5-tetramethyl-1,3,2-dioxaborolan-2-yl)ethyl)benzonitrile,  
500 MHz, CDCl<sub>3</sub>

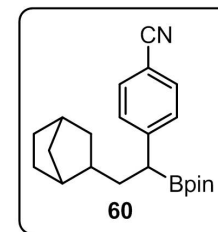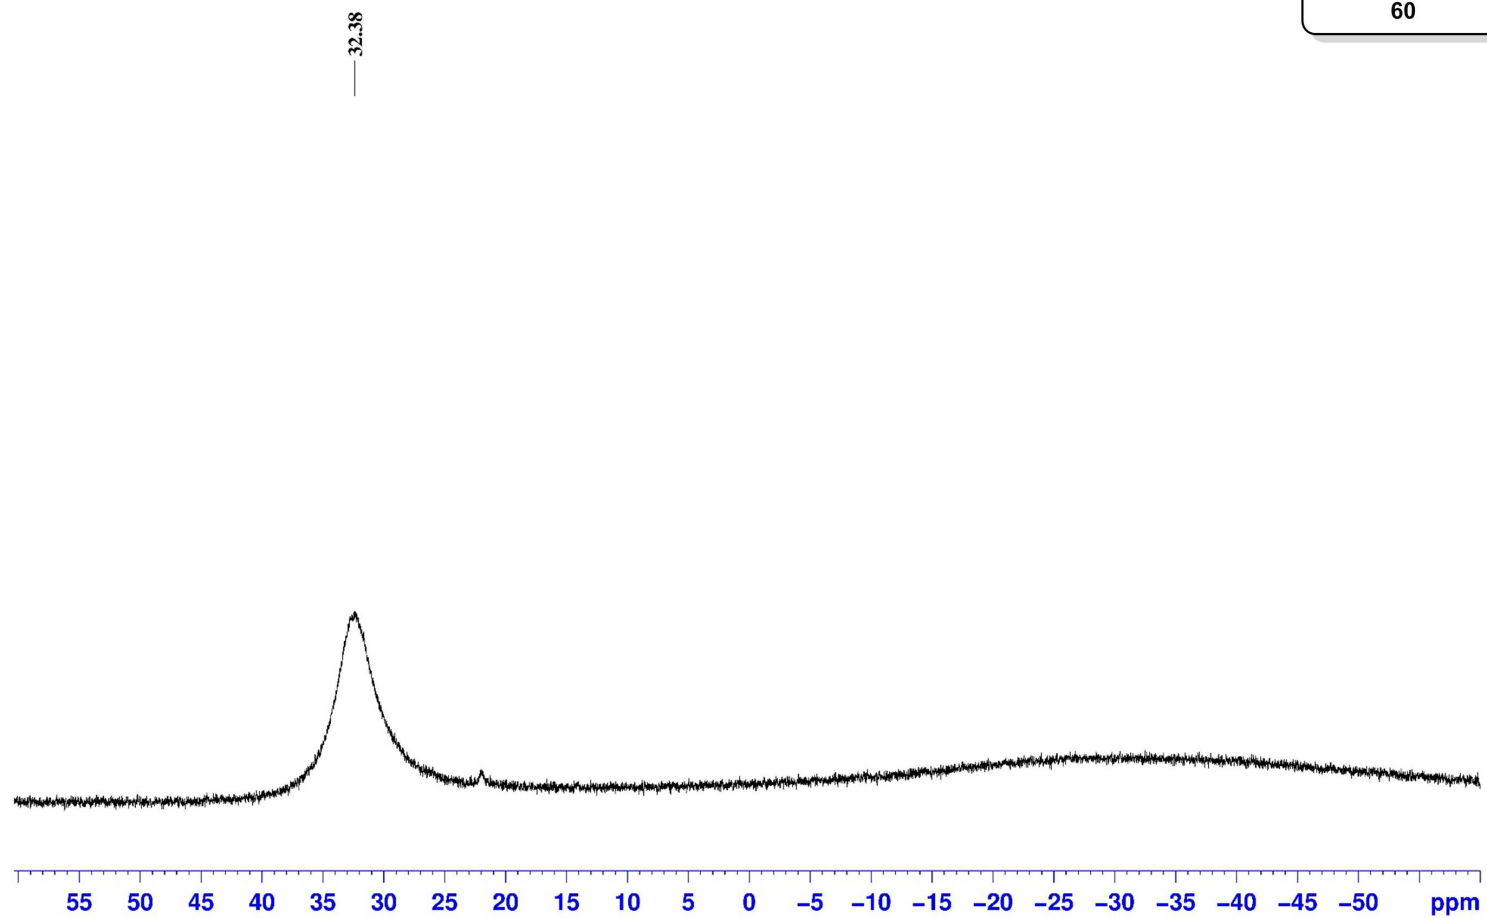

# <sup>1</sup>H NMR

4,8,8-trimethyl-4-(2-(4-(morpholinofonyl)phenyl)-2-(4,4,5,5-tetramethyl-1,3,2-dioxaborolan-2-yl)ethyl)-6-(4,4,5,5-tetramethyl-1,3,2-dioxaborolan-2-yl)bicyclo[3.3.1]nonan-2-one

500 MHz, CDCl<sub>3</sub>

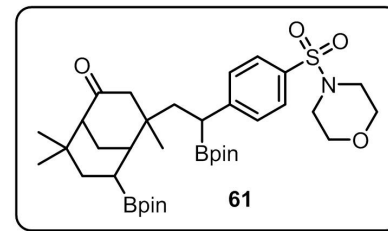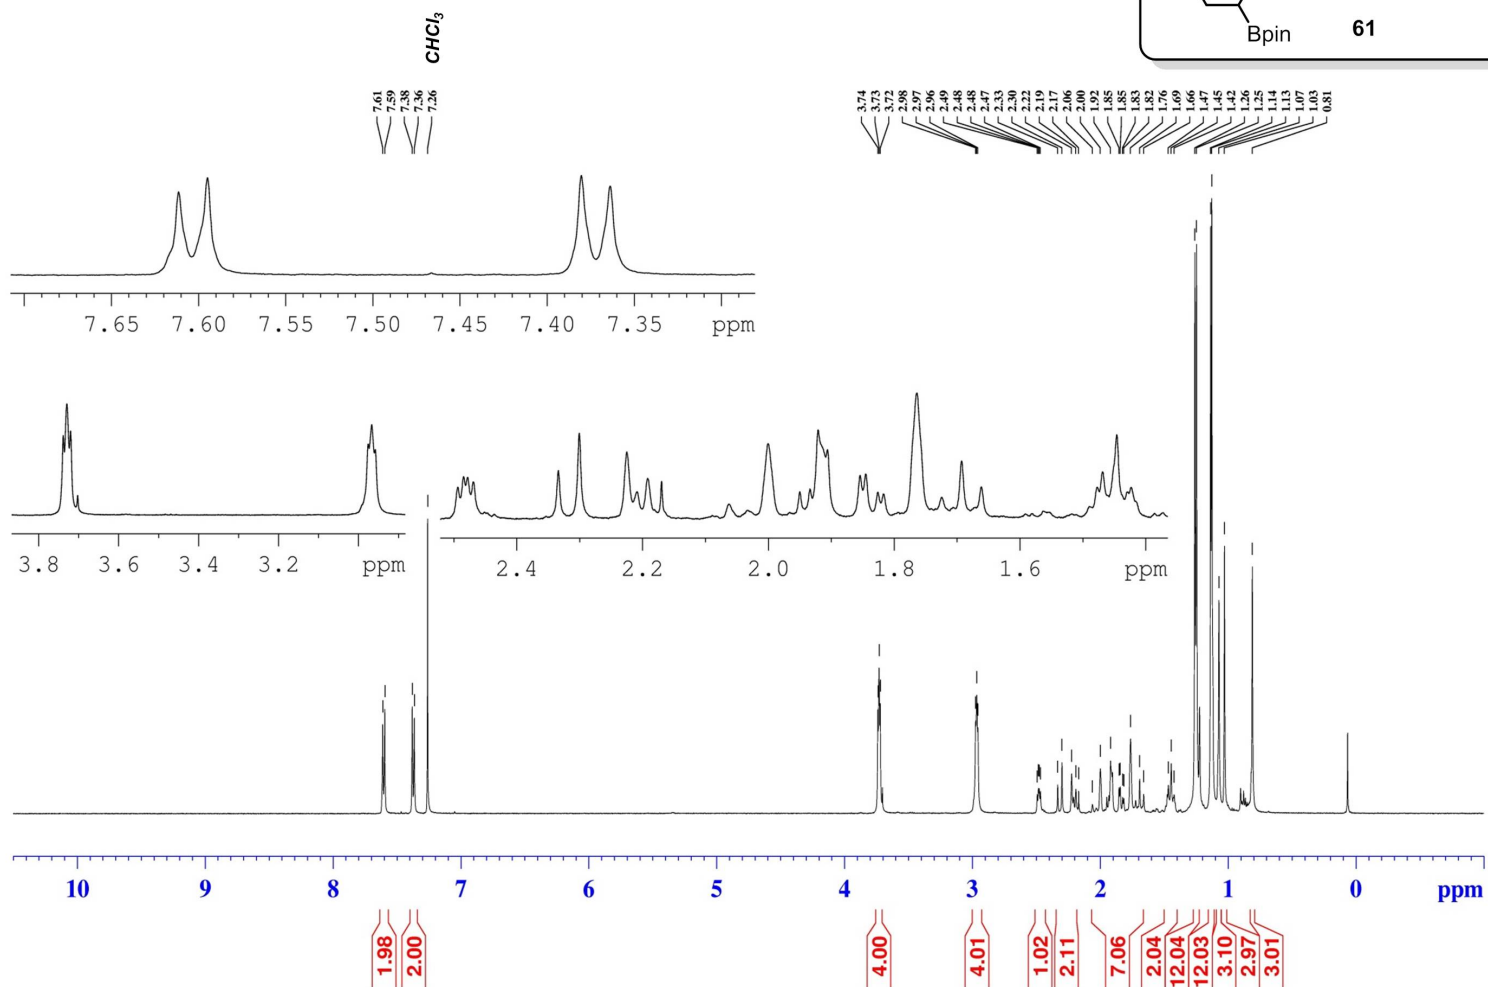

**<sup>13</sup>C NMR**

4,8,8-Trimethyl-4-(2-(4-(morpholinosulfonyl)phenyl)-2-(4,4,5,5-tetramethyl-1,3,2-dioxaborolan-2-yl)ethyl)-6-(4,4,5,5-tetramethyl-1,3,2-dioxaborolan-2-yl)bicyclo[3.3.1]nonan-2-one  
125 MHz, CDCl<sub>3</sub>

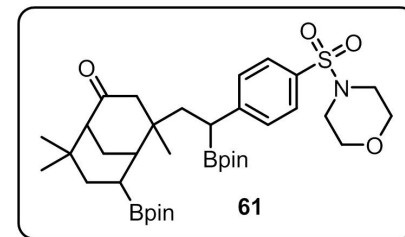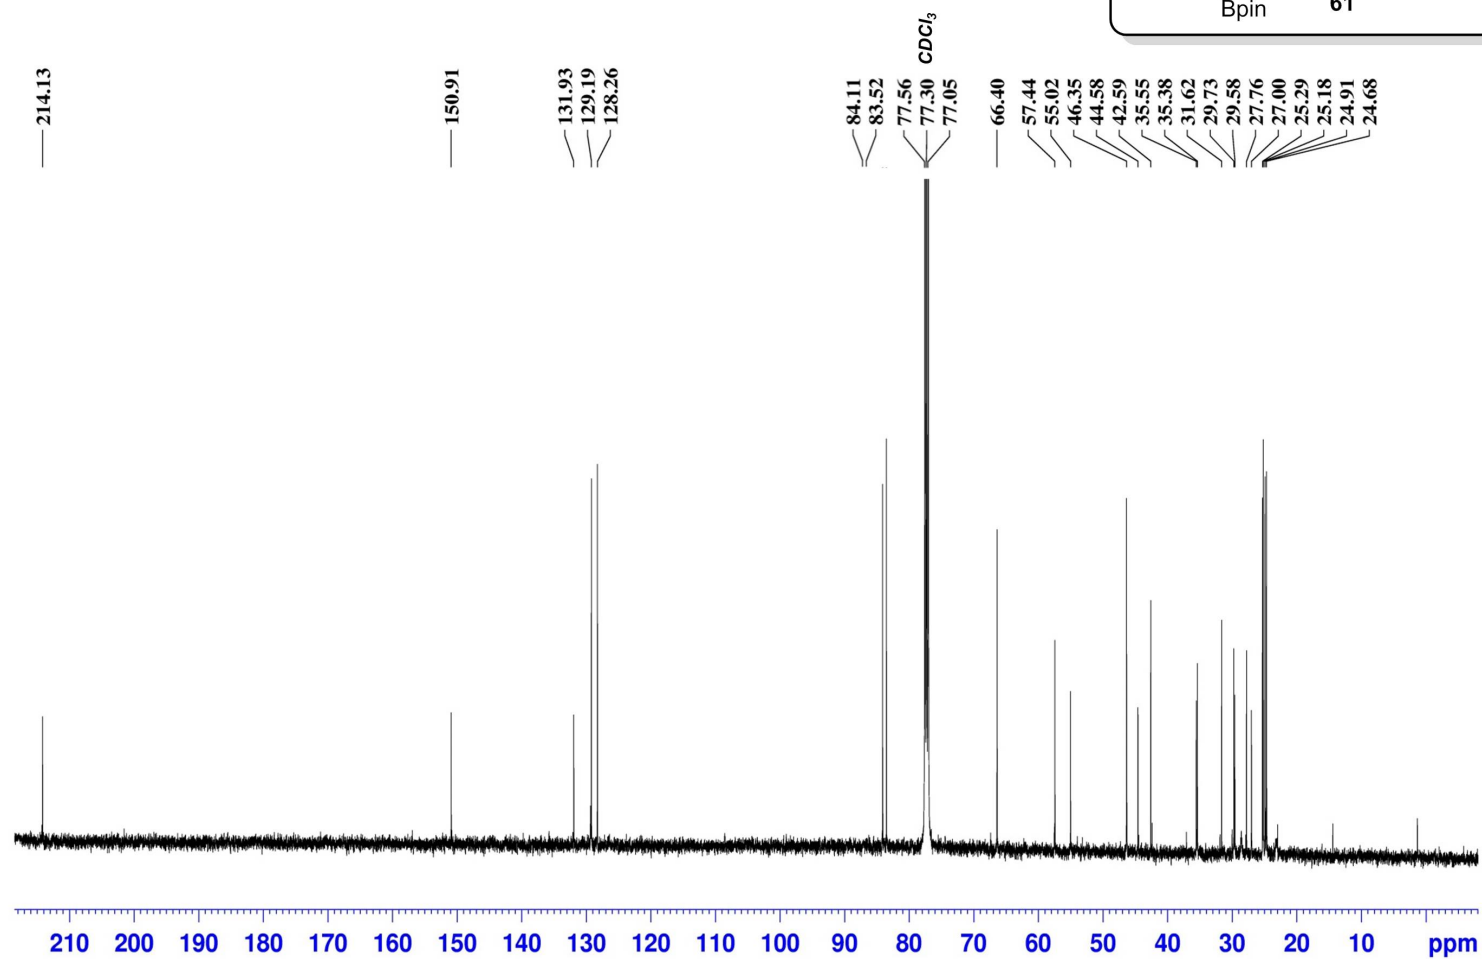

**<sup>11</sup>B NMR**

4,8,8-trimethyl-4-(2-(4-(morpholinosulfonyl)phenyl)-2-(4,4,5,5-tetramethyl-1,3,2-dioxaborolan-2-yl)ethyl)-6-(4,4,5,5-tetramethyl-1,3,2-dioxaborolan-2-yl)bicyclo[3.3.1]nonan-2-one  
128 MHz, CDCl<sub>3</sub>

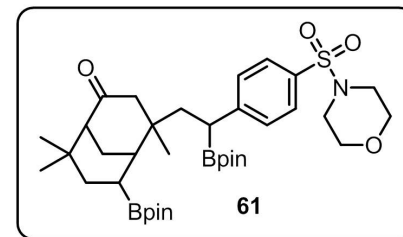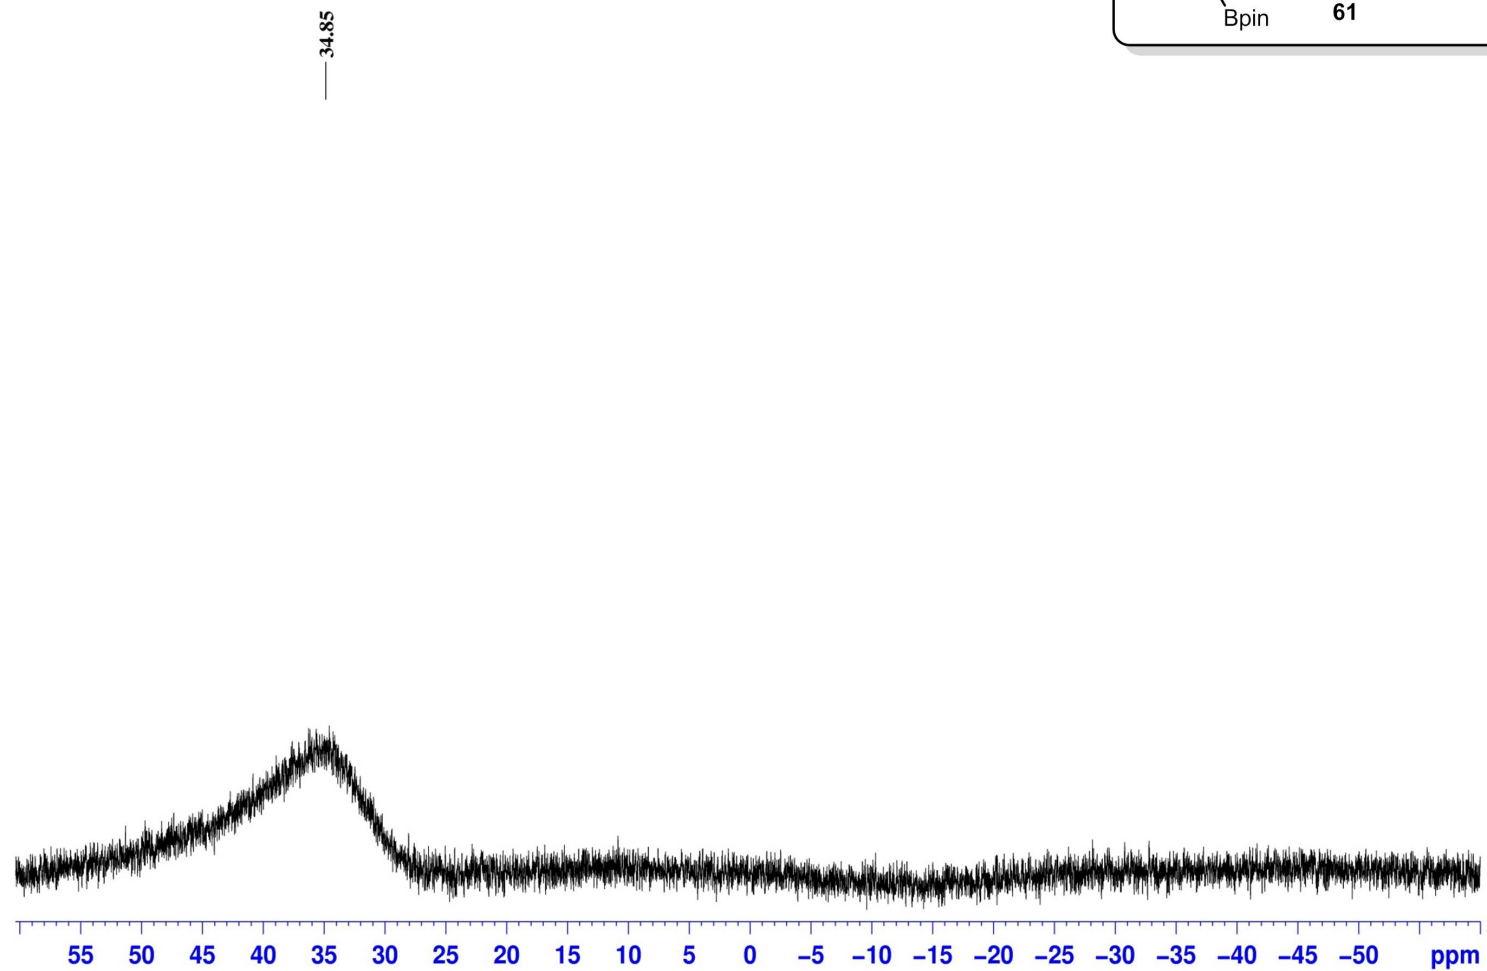

# <sup>1</sup>H NMR

4-((4-(4-methyl-4-phenethyl-2-(4,4,5,5-tetramethyl-1,3,2-dioxaborolan-2-yl)cyclopentyl)methyl)phenyl)sulfonyl)morpholine  
500 MHz, CDCl<sub>3</sub>

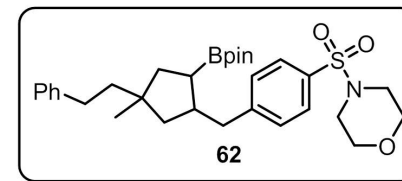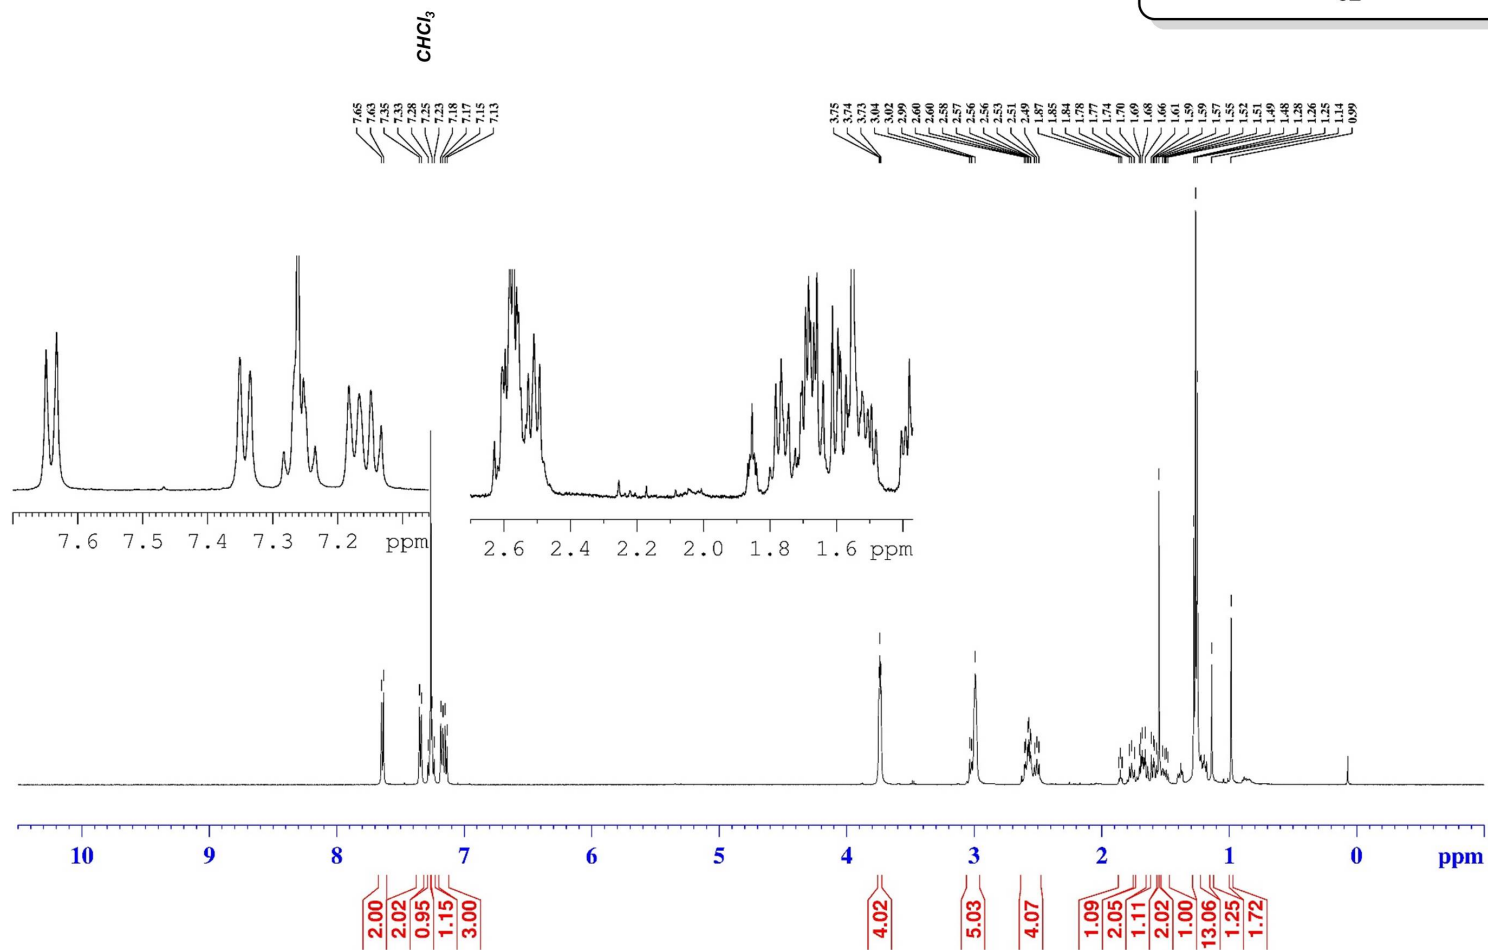

S328



**<sup>13</sup>C NMR**

4-((4-(4-Methyl-4-phenethyl-2-(4,4,5,5-tetramethyl-1,3,2-dioxaborolan-2-yl)cyclopentyl)methyl)phenyl)sulfonyl)morpholine  
125 MHz, CDCl<sub>3</sub>

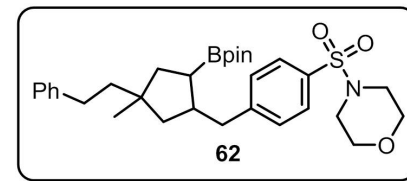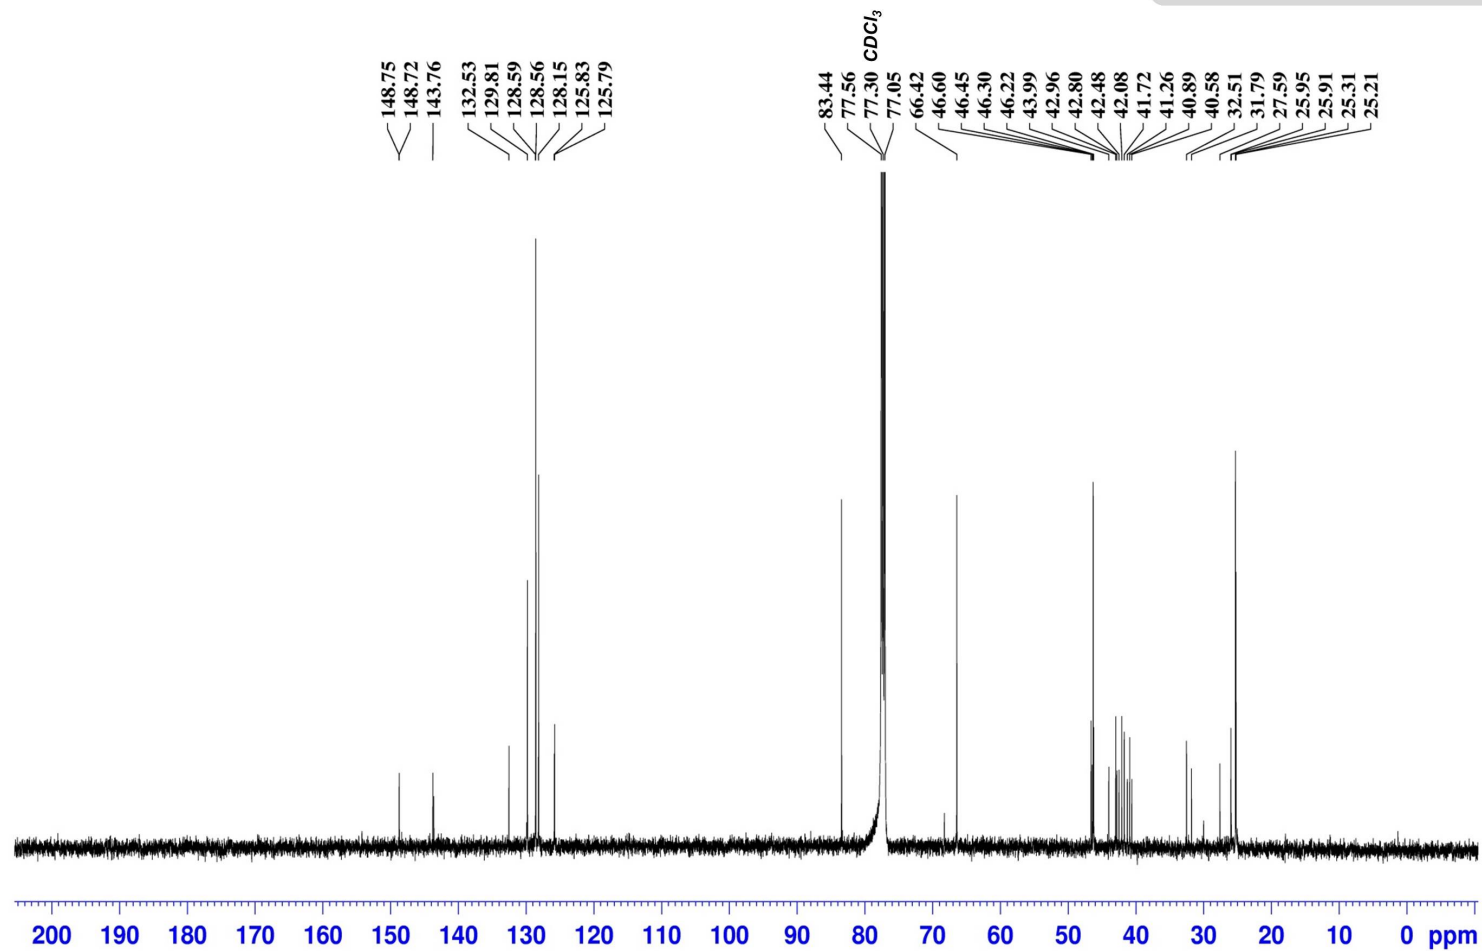

**<sup>11</sup>B NMR**

4-((4-(4-methyl-4-phenethyl-2-(4,4,5,5-tetramethyl-1,3,2-dioxaborolan-2-yl)cyclopentyl)methyl)phenyl)sulfonyl)morpholine  
128 MHz, CDCl<sub>3</sub>

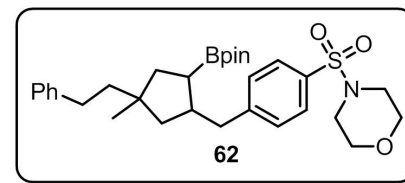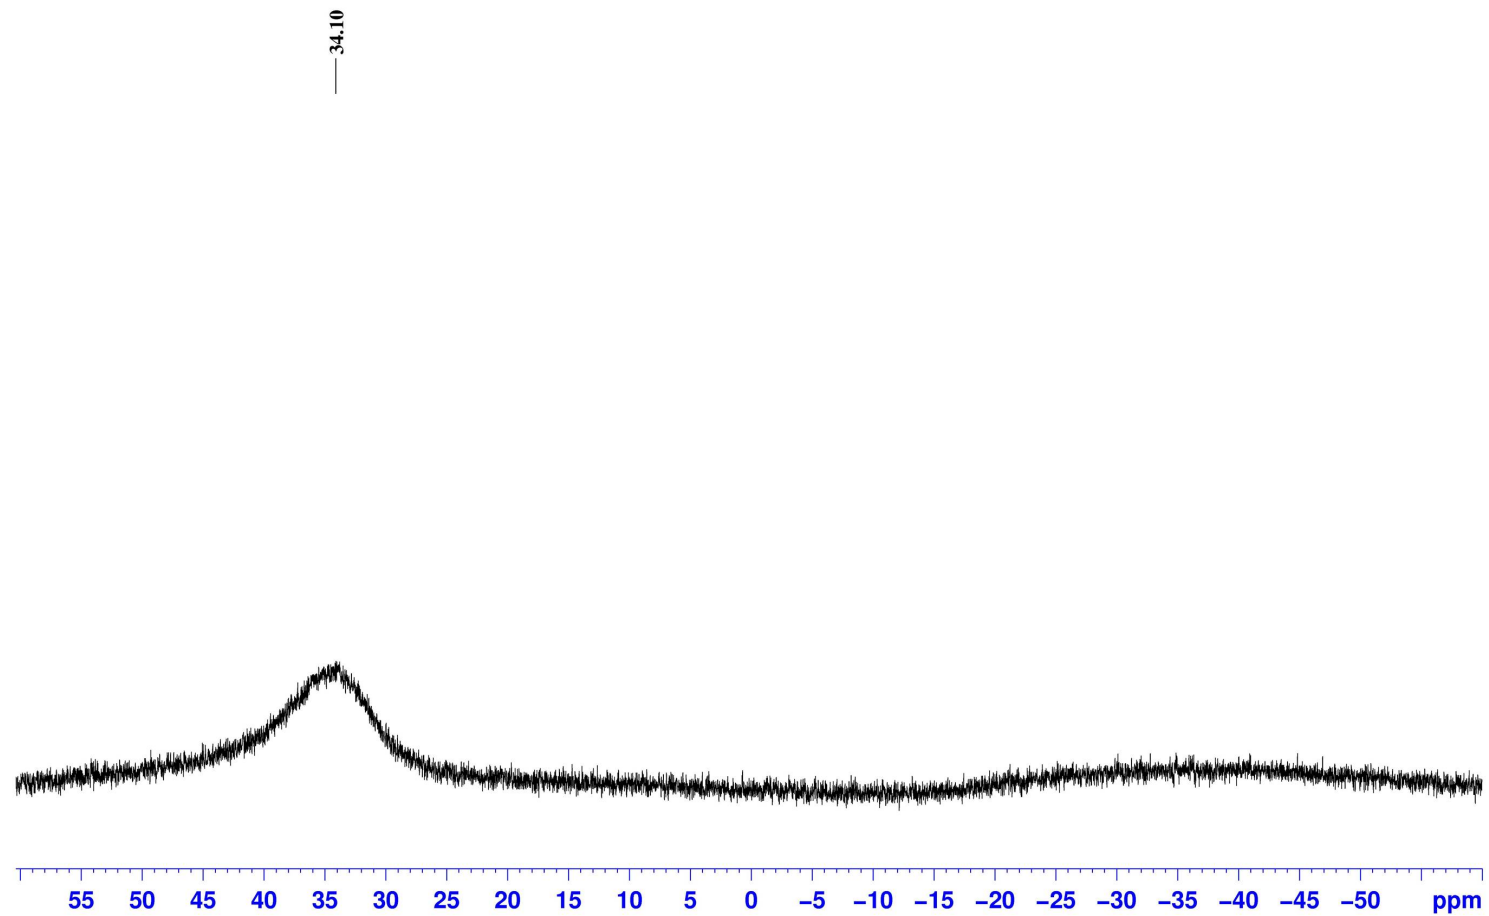

S330

# <sup>1</sup>H NMR

2-(3,3-dimethyl-1-(4-(3-methylbut-2-en-1-yl)phenyl)butyl)-4,4,5,5-tetramethyl-1,3,2-dioxaborolane  
500 MHz, CDCl<sub>3</sub>

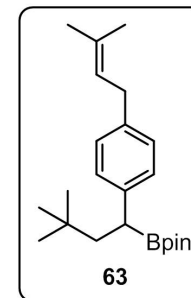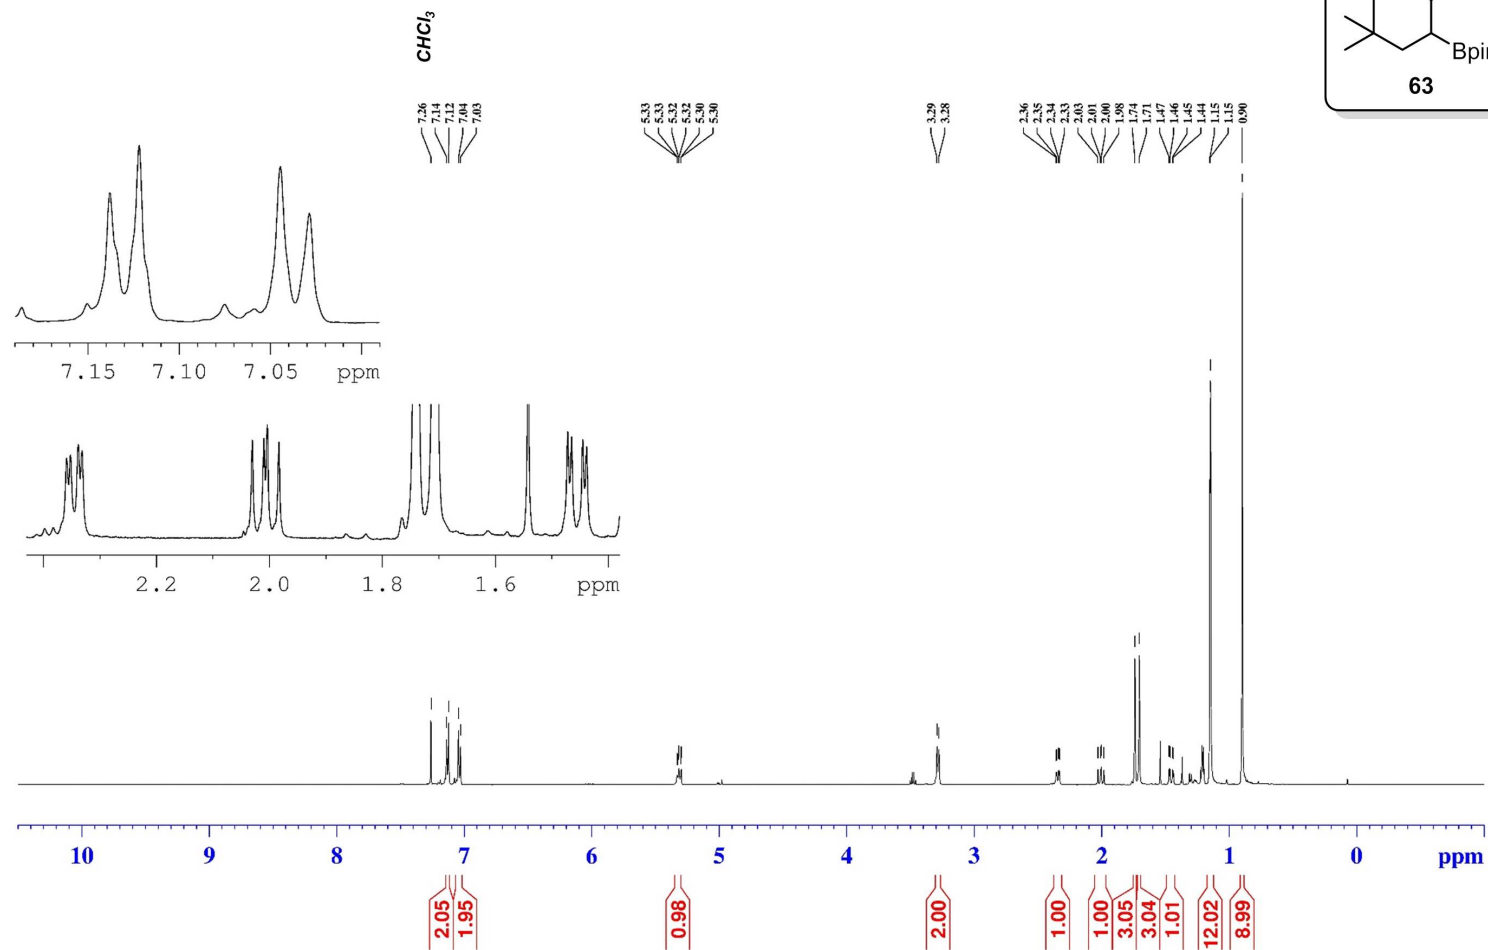

S331

**<sup>13</sup>C NMR**

2-(3,3-dimethyl-1-(4-(3-methylbut-2-en-1-yl)phenyl)butyl)-4,4,5,5-tetramethyl-1,3,2-dioxaborolane,  
125 MHz, CDCl<sub>3</sub>

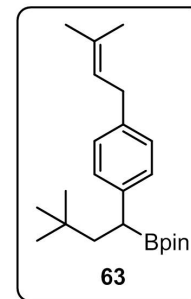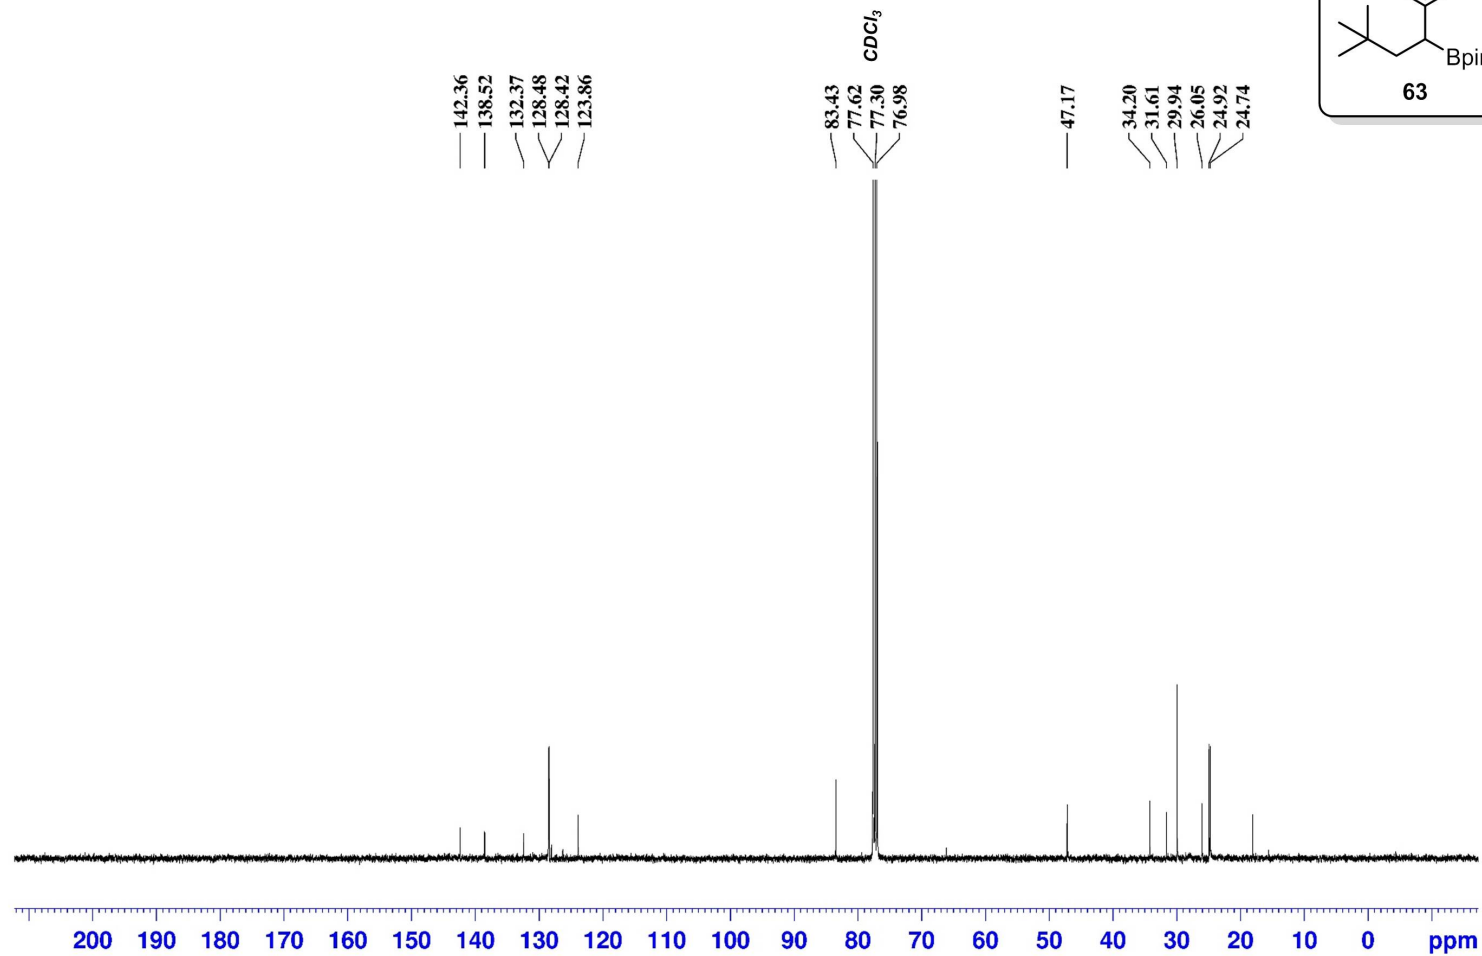

**<sup>11</sup>B NMR**

2-(3,3-dimethyl-1-(4-(3-methylbut-2-en-1-yl)phenyl)butyl)-4,4,5,5-tetramethyl-1,3,2-dioxaborolane,  
128 MHz, CDCl<sub>3</sub>

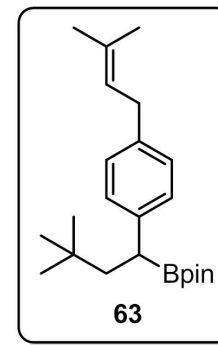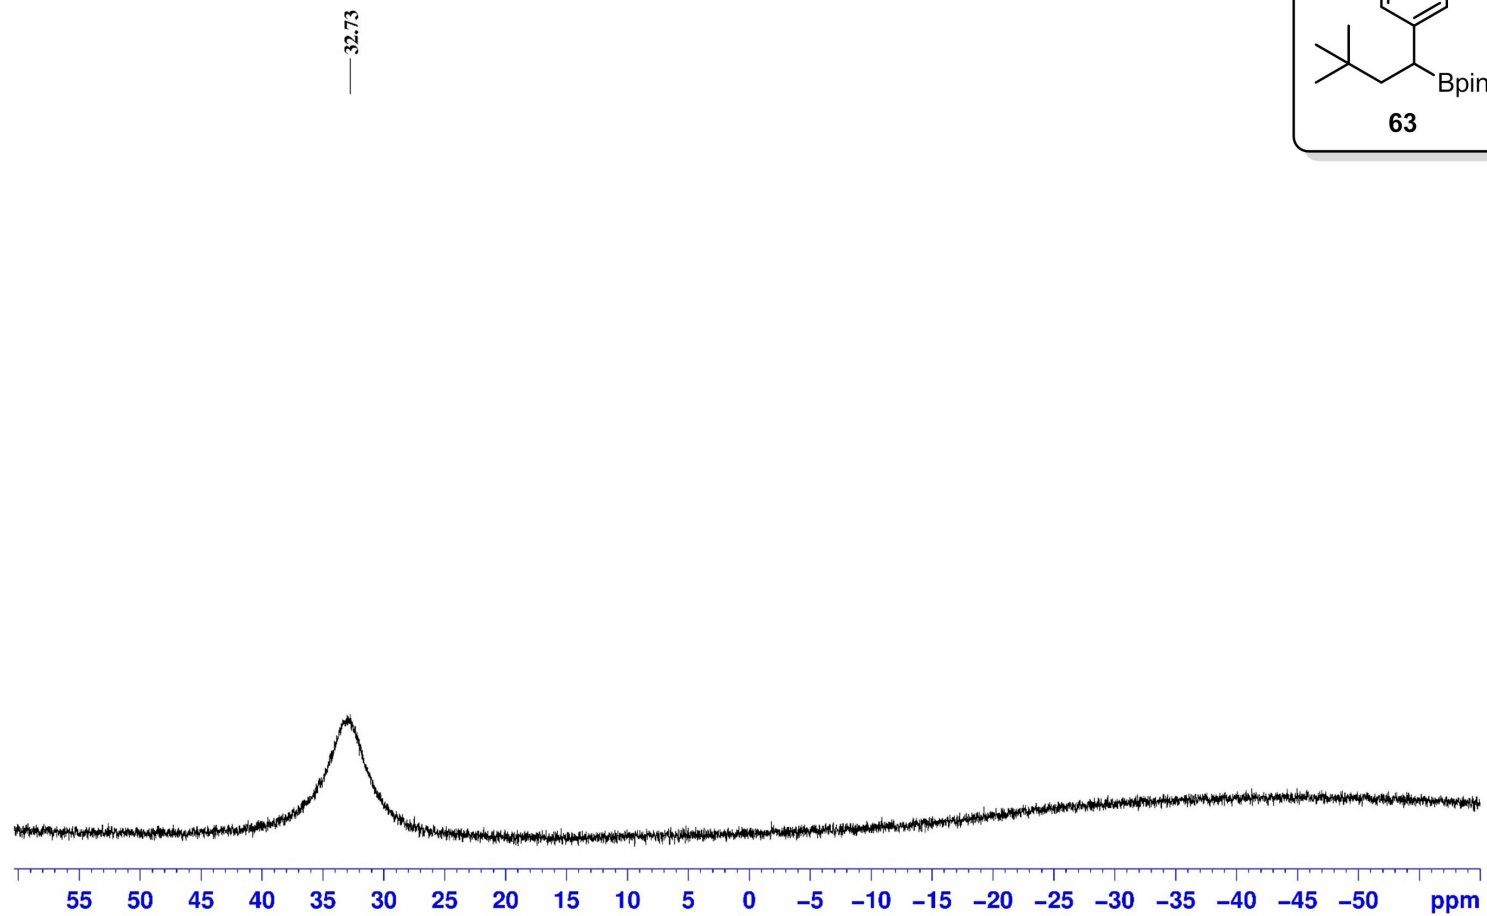

S333

# <sup>1</sup>H NMR

Pent-4-en-1-yl 2-(4-cyanophenyl)-4,4-dimethylpentanoate  
500 MHz, CDCl<sub>3</sub>

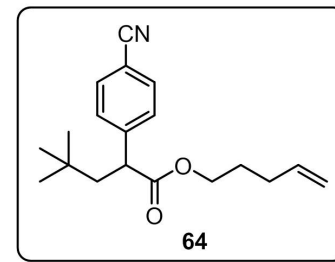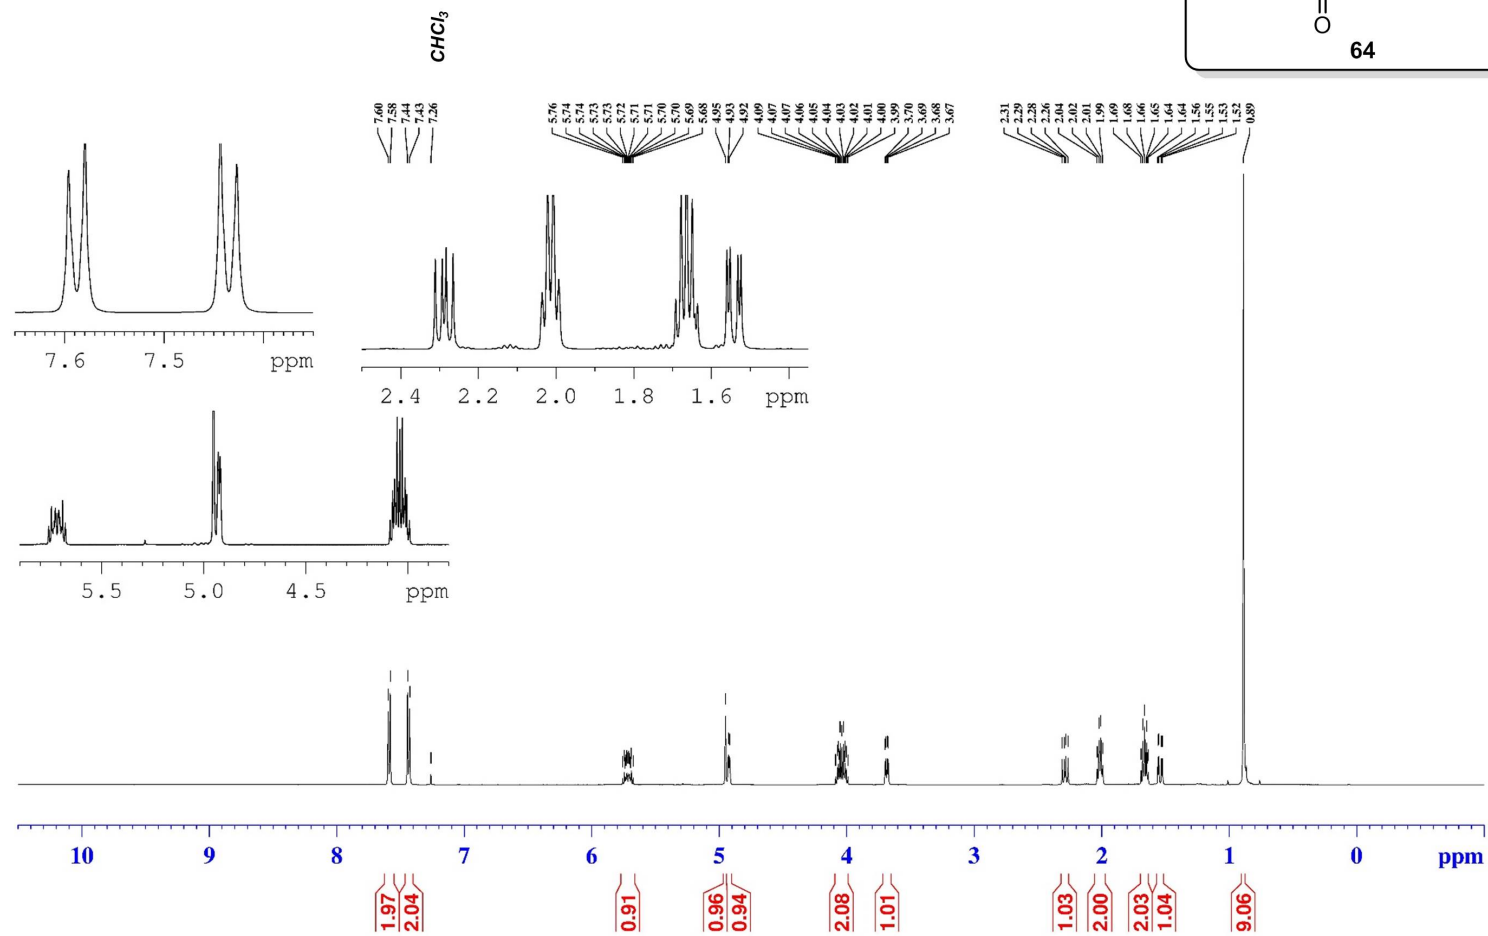

Pent-4-en-1-yl 2-(4-cyanophenyl)-4,4-dimethylpentanoate,  
125 MHz, CDCl<sub>3</sub>

<sup>13</sup>C NMR

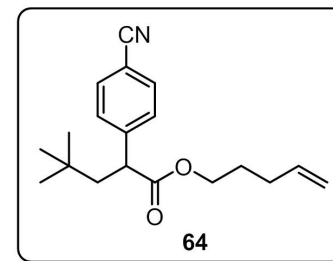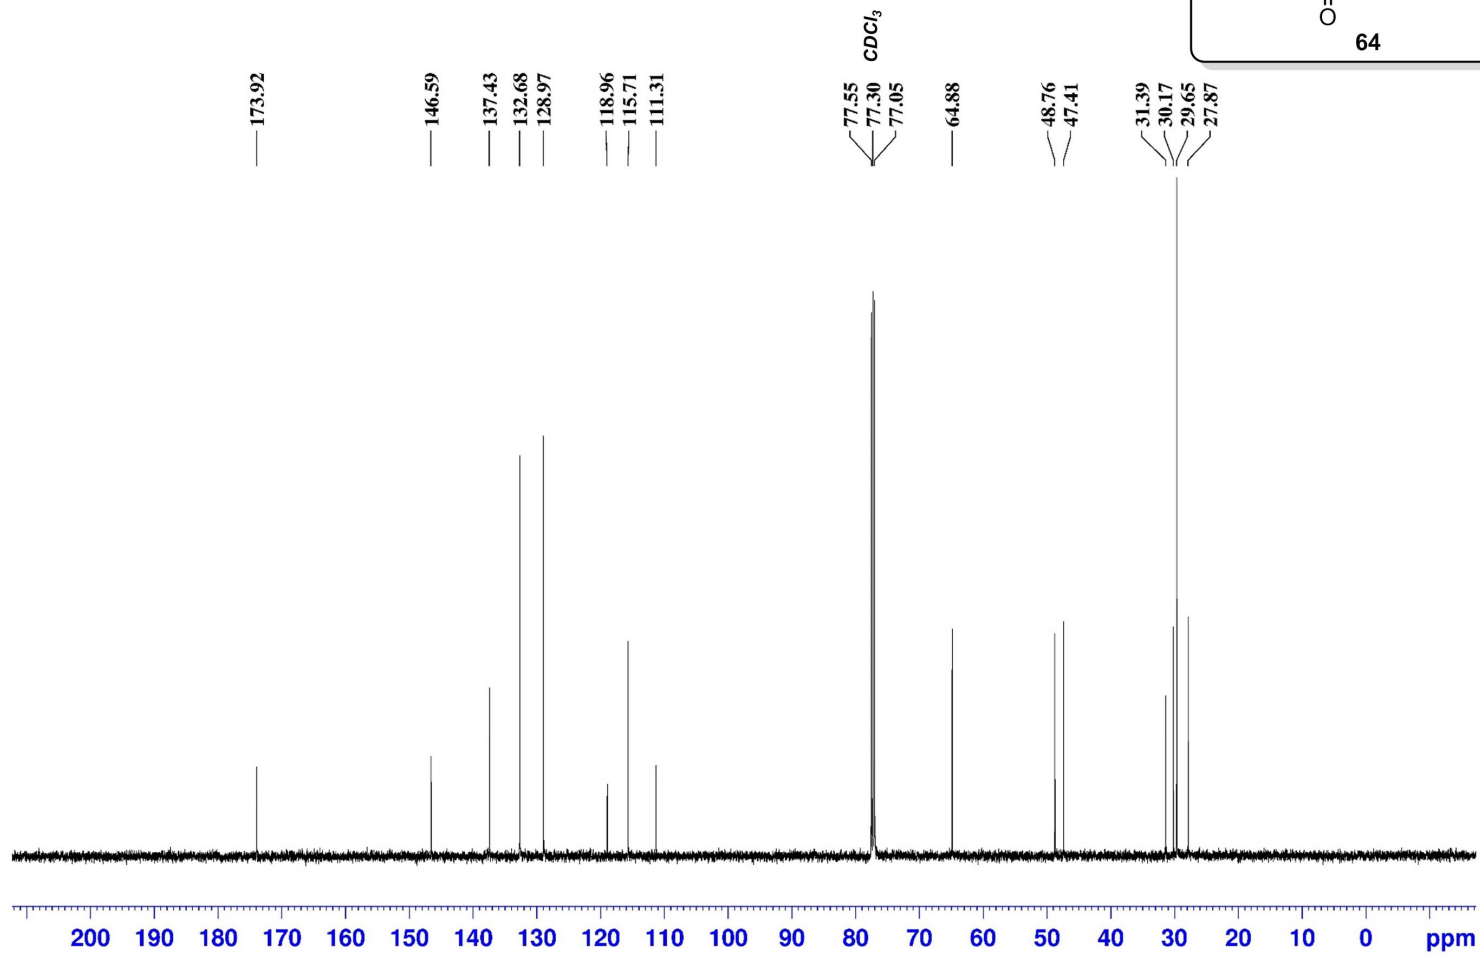

# <sup>1</sup>H NMR

(S)-6-methyl-2-((S)-4-methylcyclohex-3-en-1-yl)hept-5-en-2-yl 2-(4-cyanophenyl)-4,4-dimethylpentanoate  
500 MHz, CDCl<sub>3</sub>

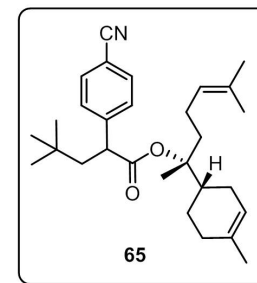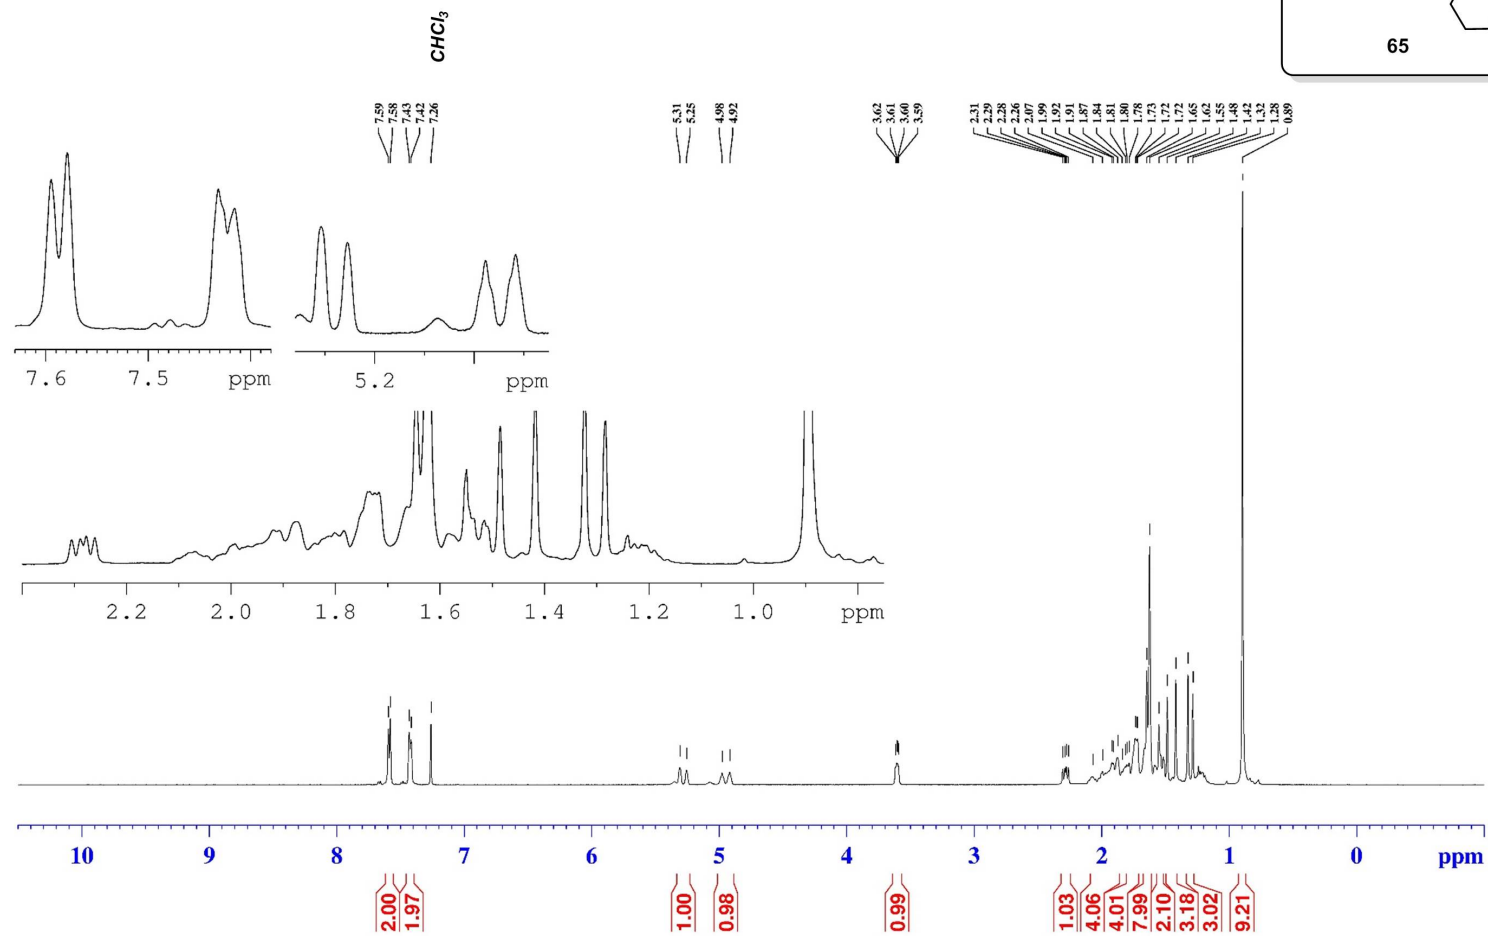



**<sup>13</sup>C NMR**

(*S*)-6-methyl-2-((*S*)-4-methylcyclohex-3-en-1-yl)hept-5-en-2-yl 2-(4-cyanophenyl)-4,4-dimethylpentanoate,  
125 MHz, CDCl<sub>3</sub>

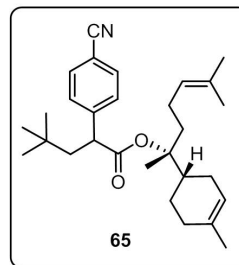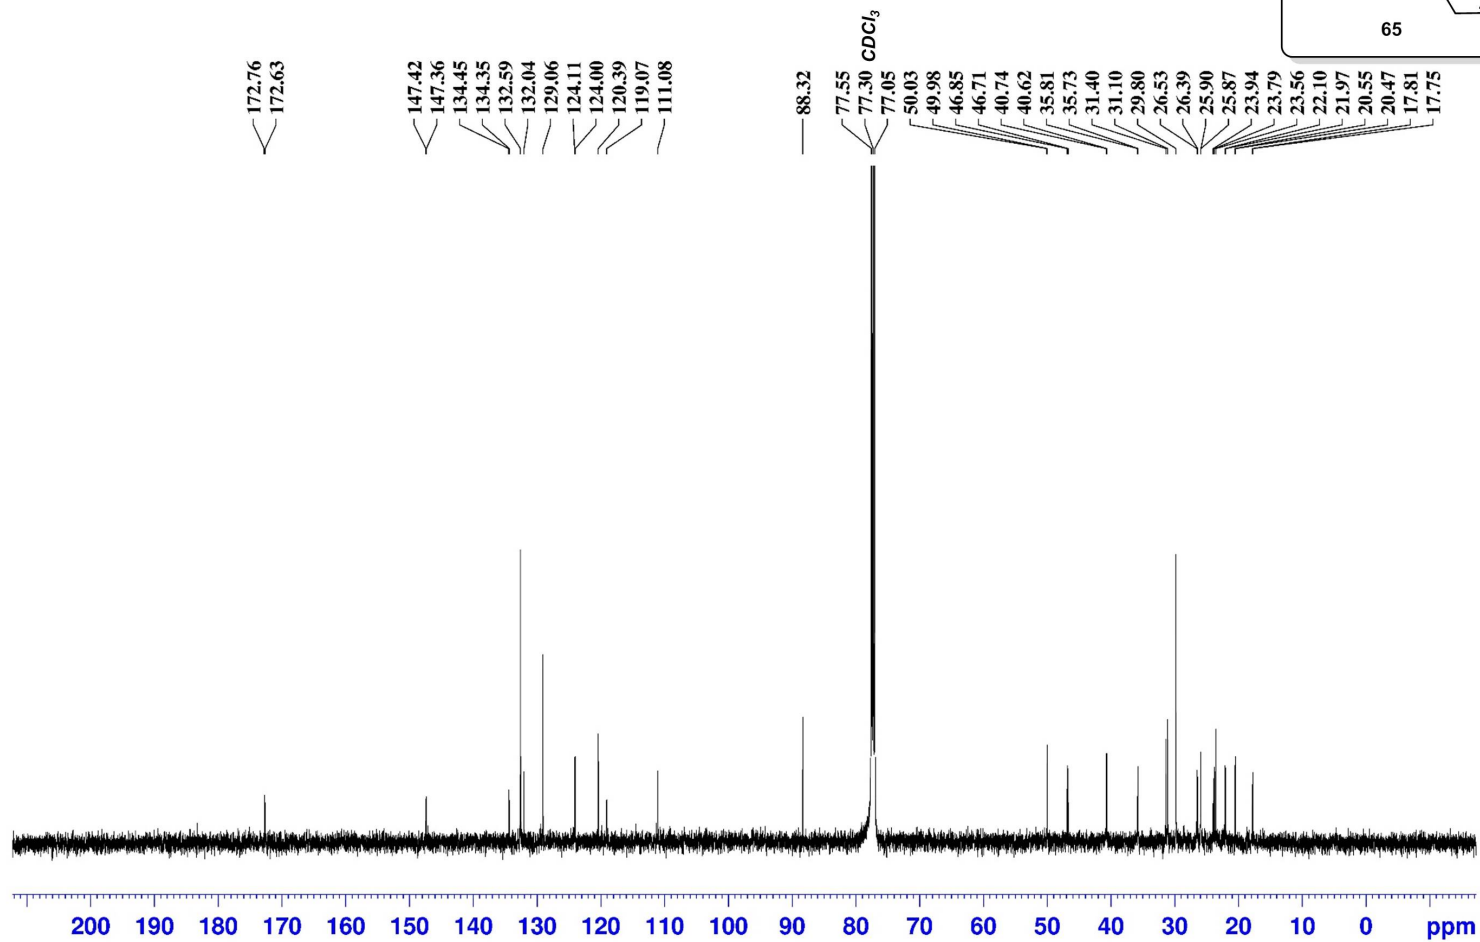

# <sup>1</sup>H NMR

((S)-4-(prop-1-en-2-yl)cyclohex-1-en-1-yl)methyl 2-(4-cyanophenyl)-4,4-dimethylpentanoate  
500 MHz, CDCl<sub>3</sub>

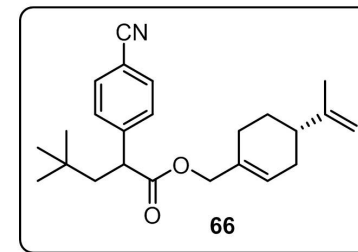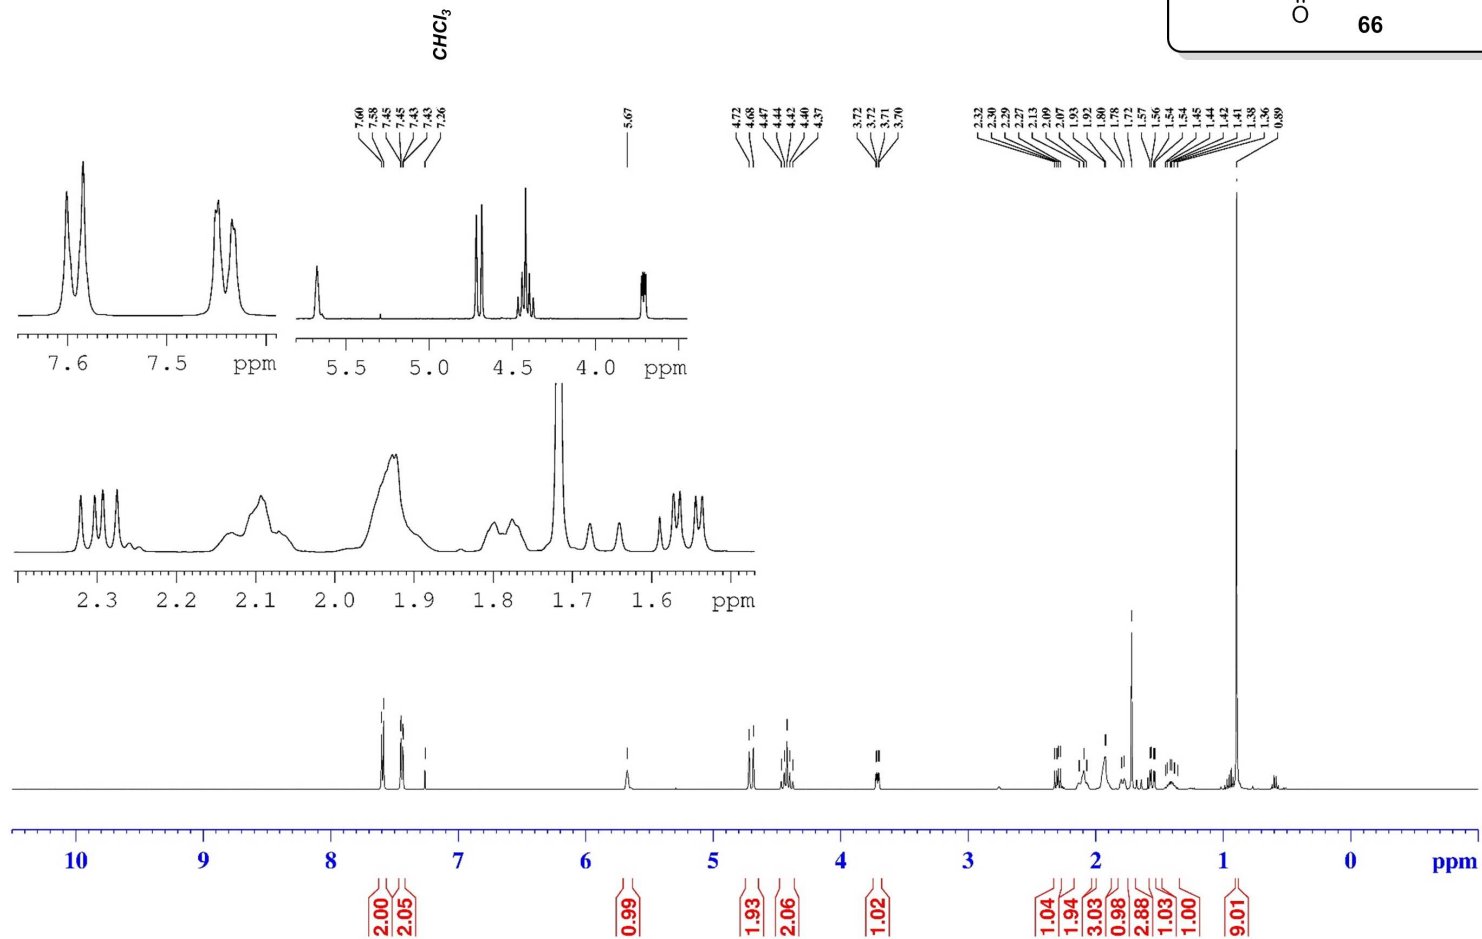

S338

**<sup>13</sup>C NMR**

**((S)-4-(prop-1-en-2-yl)cyclohex-1-en-1-yl)methyl 2-(4-cyanophenyl)-4,4-dimethylpentanoate,**  
125 MHz, CDCl<sub>3</sub>

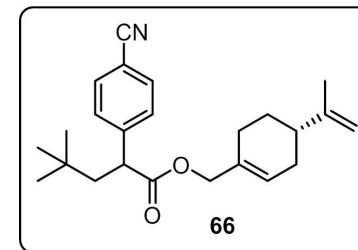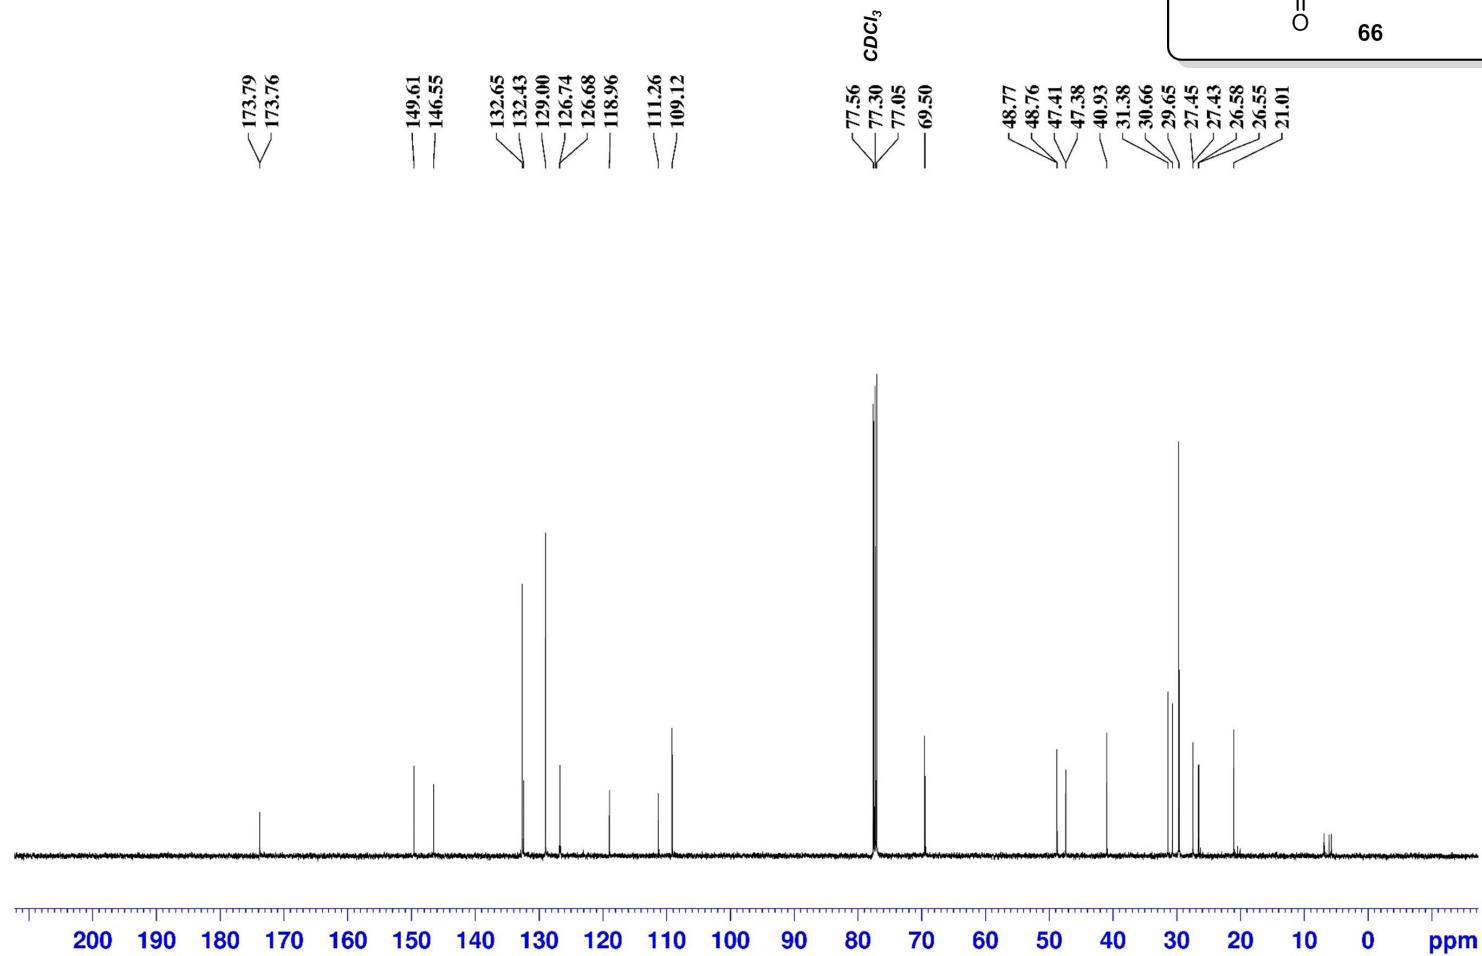

# <sup>1</sup>H NMR

(3*S*,8*S*,9*S*,10*R*,13*R*,14*S*,17*R*)-10,13-dimethyl-17-((*R*)-6-methylheptan-2-yl)-2,3,4,7,8,9,10,11, 12,13,14,15,16,17-tetradecahydro-1*H*-cyclopenta [*a*]phenanthren-3-yl 2-(4-cyanophenyl)-4,4-dimethyl pentanoate  
500 MHz, CDCl<sub>3</sub>

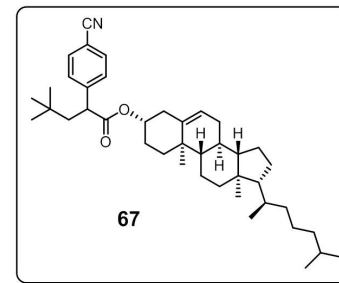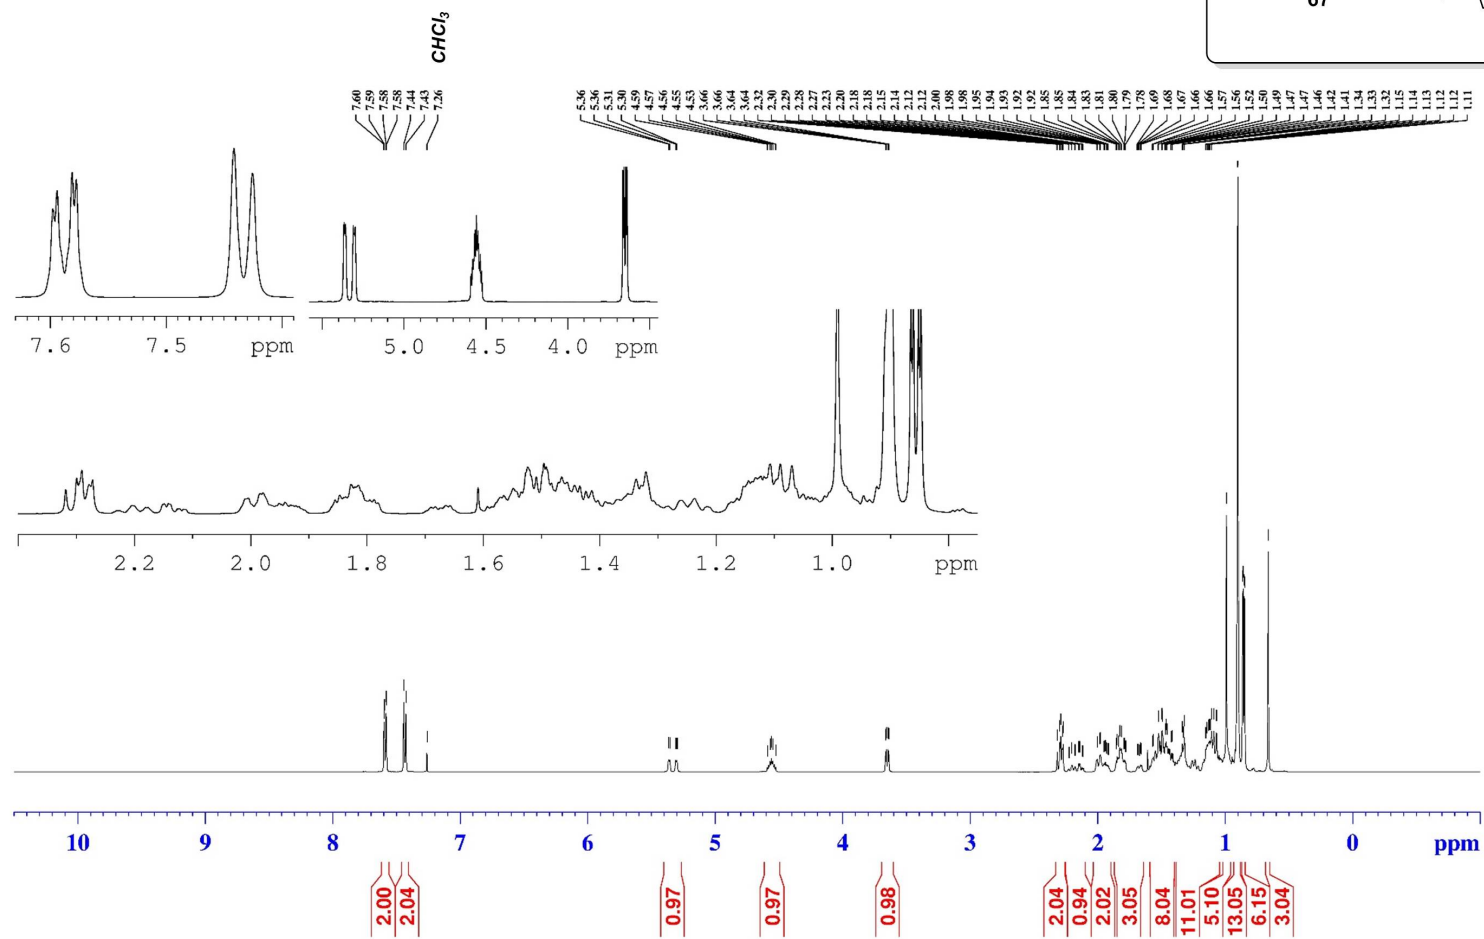

### <sup>13</sup>C NMR

(3*S*,8*S*,9*S*,10*R*,13*R*,14*S*,17*R*)-10,13-dimethyl-17-((*R*)-6-methylheptan-2-yl)-2,3,4,7,8,9,10,11, 12,13,14,15,16,17-tetradecahydro-1*H*-cyclopenta [*a*]phenanthren-3-yl 2-(4-cyanophenyl)-4,4-dimethyl pentanoate, 125 MHz, CDCl<sub>3</sub>

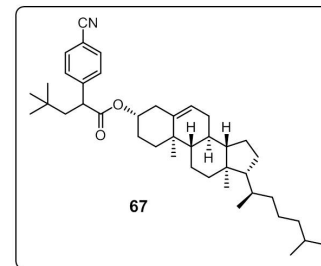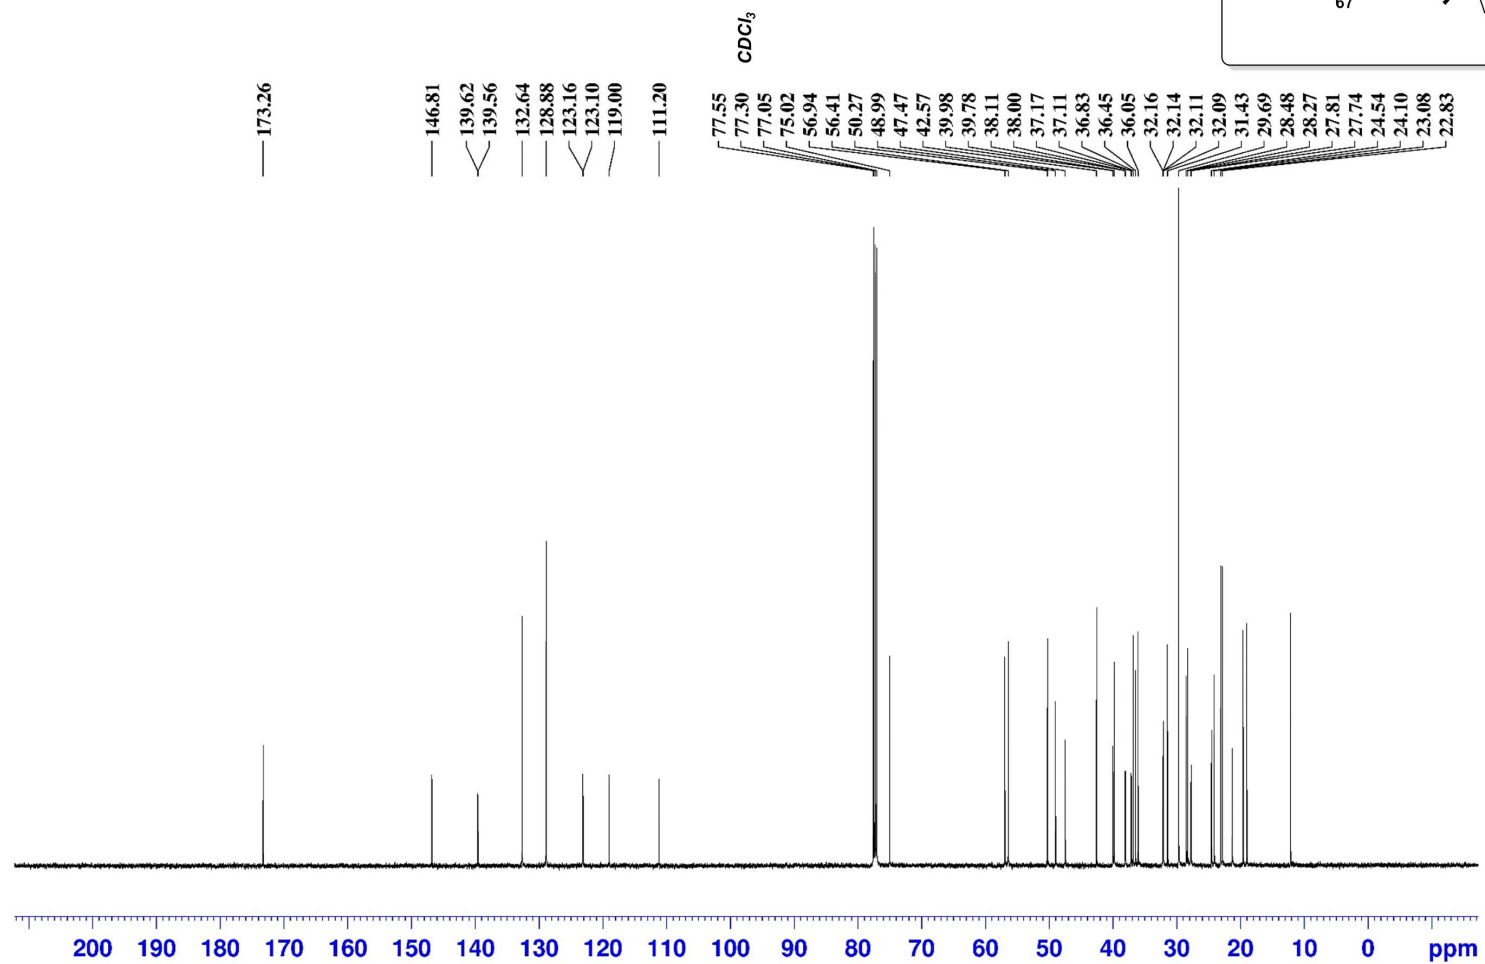

S341

# <sup>1</sup>H NMR

2-((1S)-6,6-dimethylbicyclo[3.1.1]hept-2-en-3-yl)ethyl 2-(4-cyanophenyl)-4,4-dimethyl pentanoate  
500 MHz, CDCl<sub>3</sub>

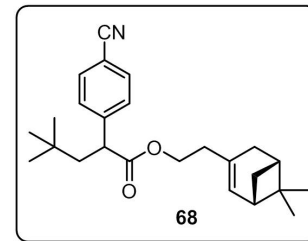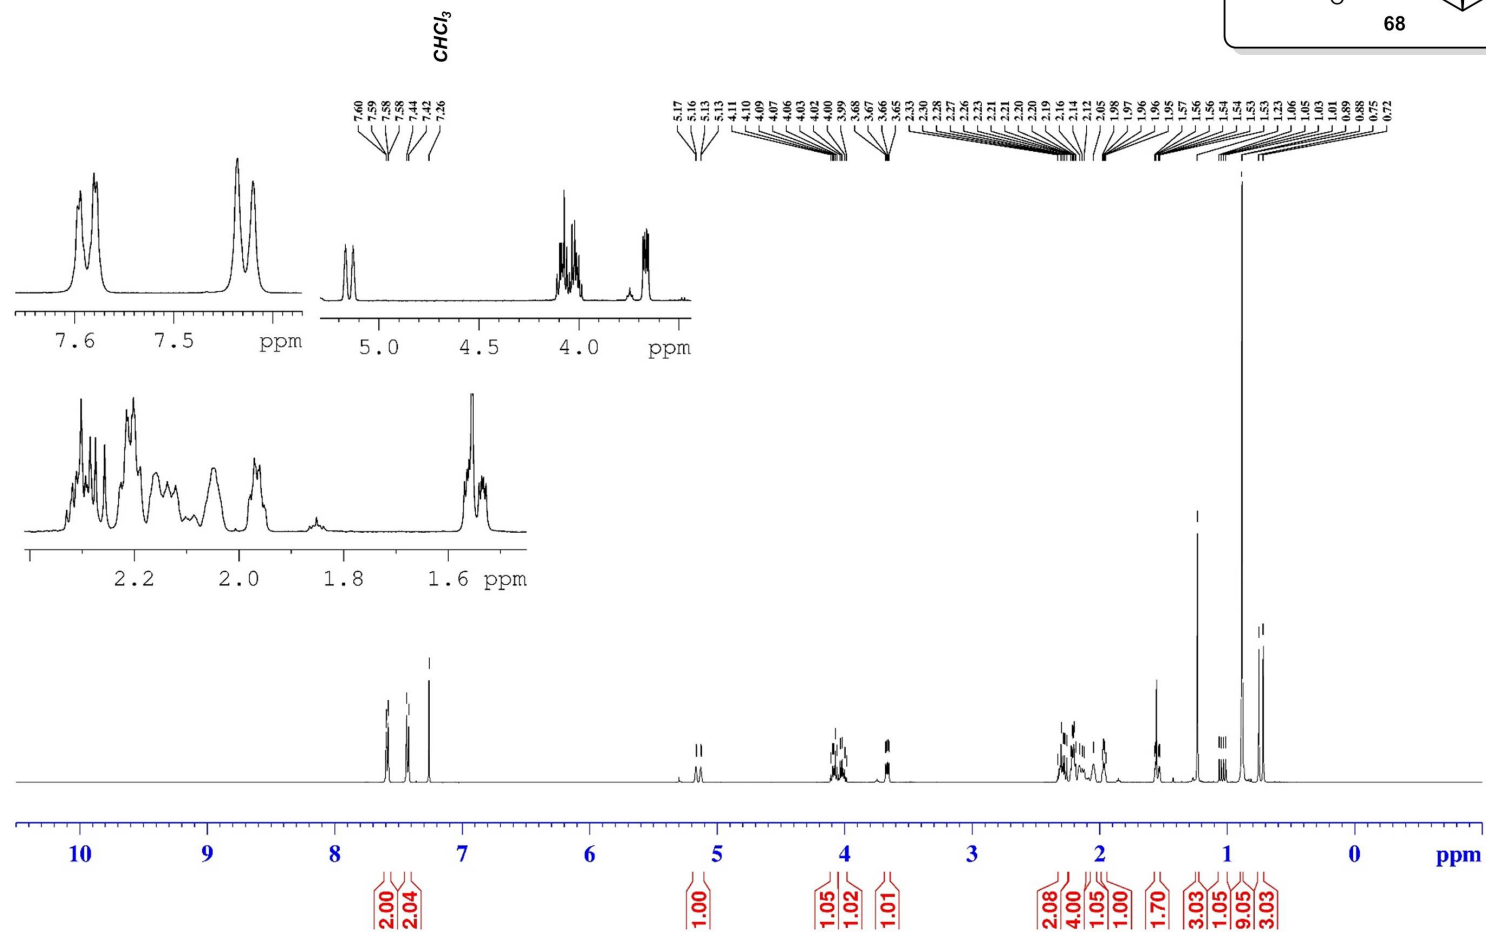

**<sup>13</sup>C NMR**

2-((1*S*)-6,6-dimethylbicyclo[3.1.1]hept-2-en-3-yl)ethyl 2-(4-cyanophenyl)-4,4-dimethyl pentanoate  
125 MHz, CDCl<sub>3</sub>

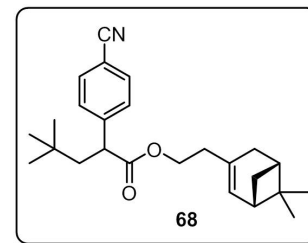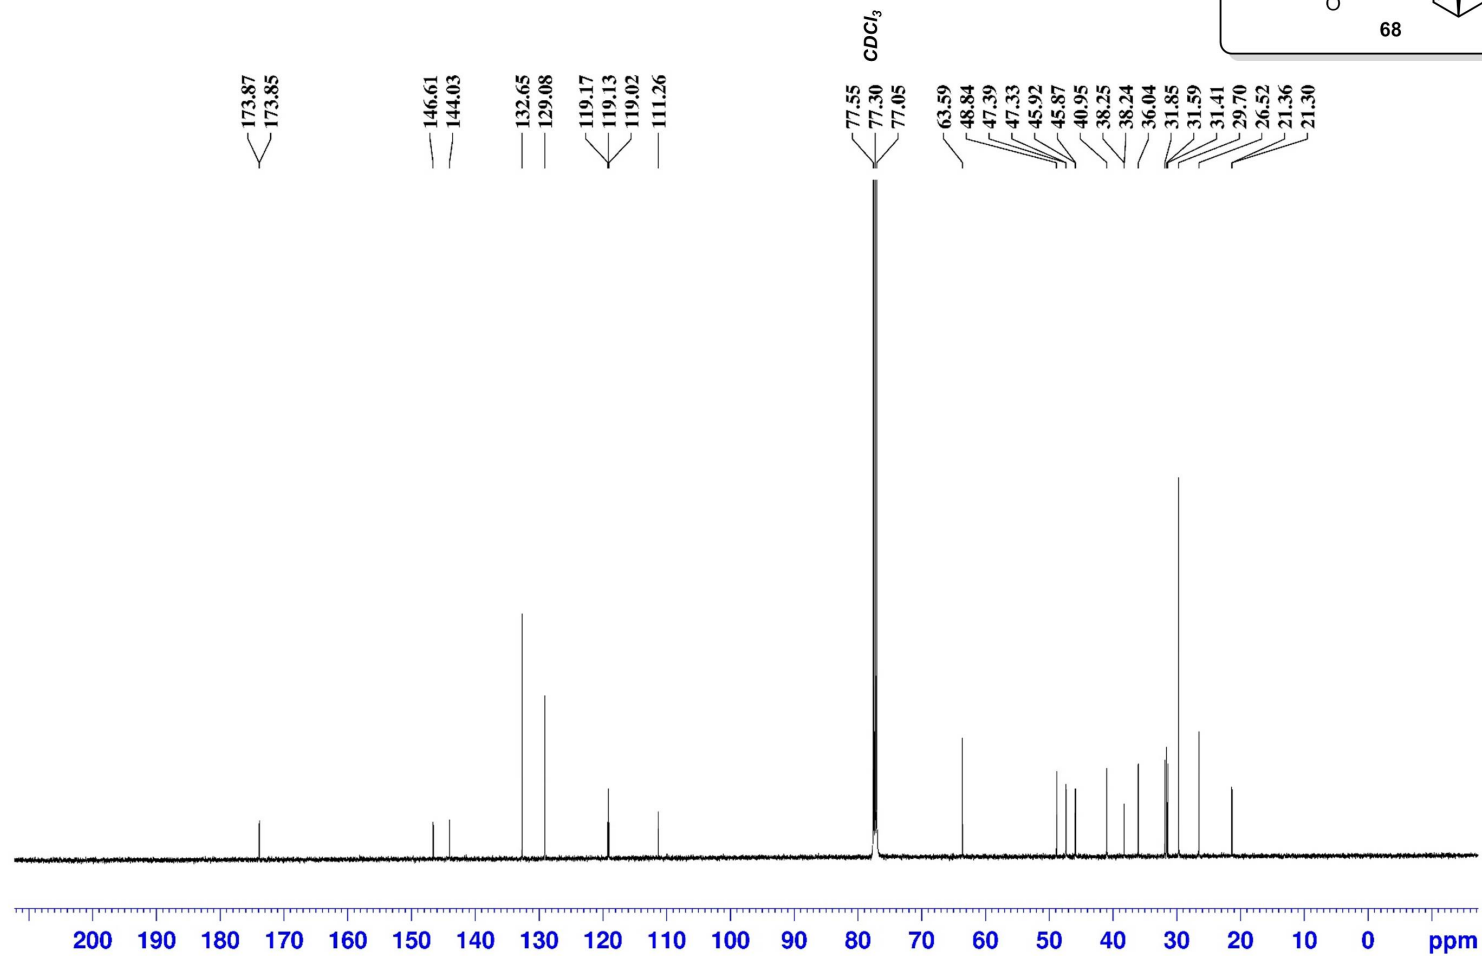

**<sup>1</sup>H NMR**

**2-(1-(4-chlorophenyl)-3,3-dimethylbutyl)furan**  
500 MHz, CDCl<sub>3</sub>

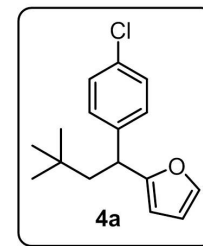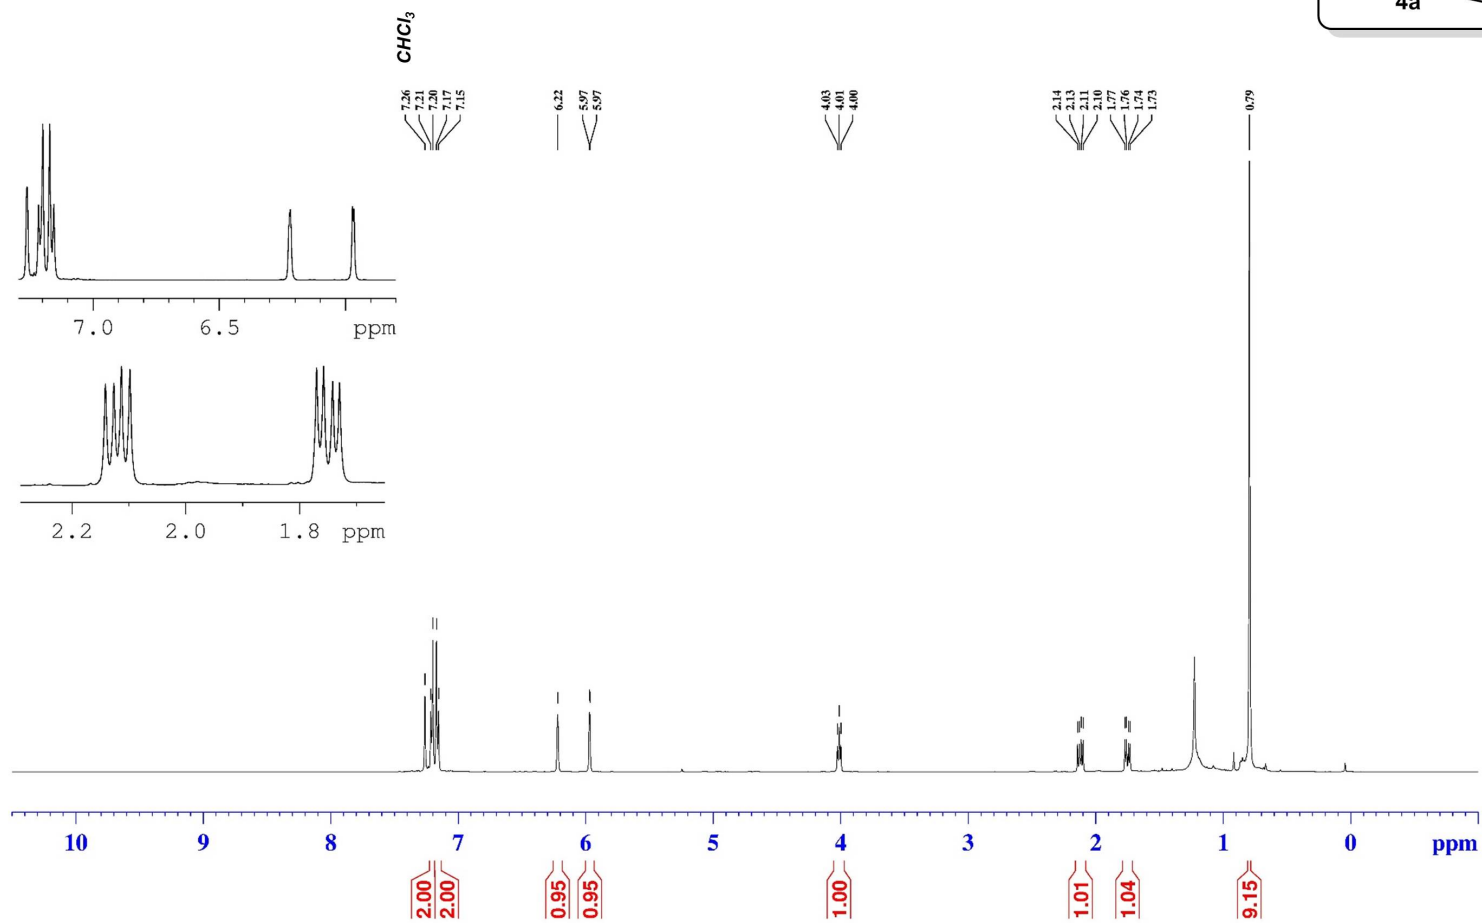



2-(1-(4-chlorophenyl)-3,3-dimethylbutyl)furan,  
125 MHz, CDCl<sub>3</sub>

<sup>13</sup>C NMR

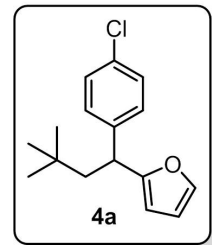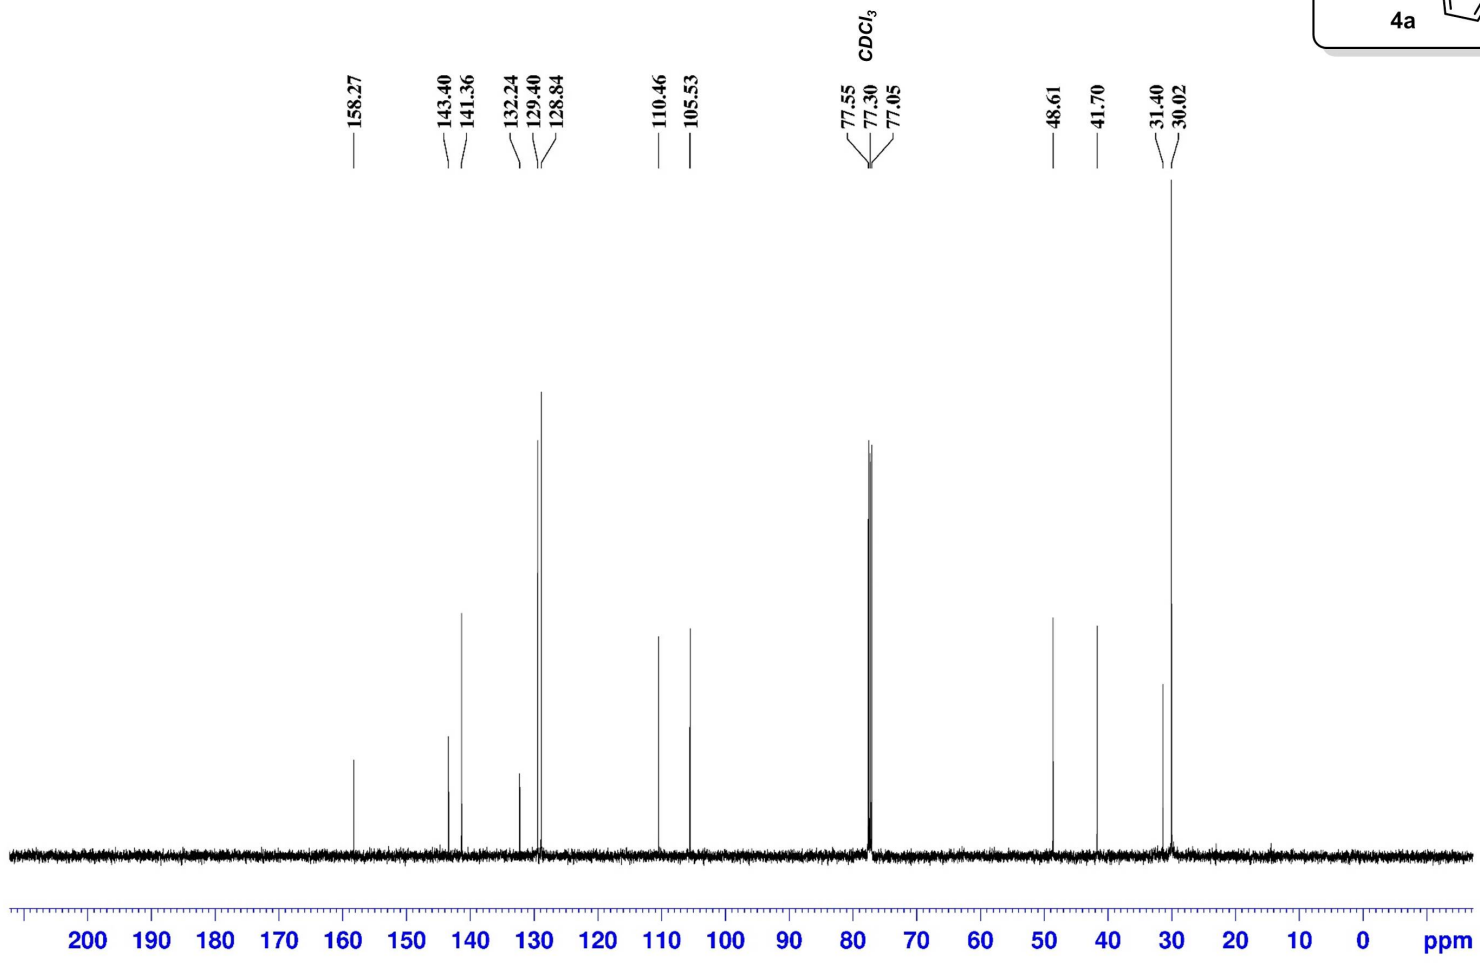

**<sup>1</sup>H NMR**

**1-(4-chlorophenyl)-3,3-dimethylbutan-1-ol**  
500 MHz, CDCl<sub>3</sub>

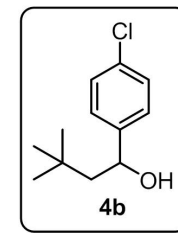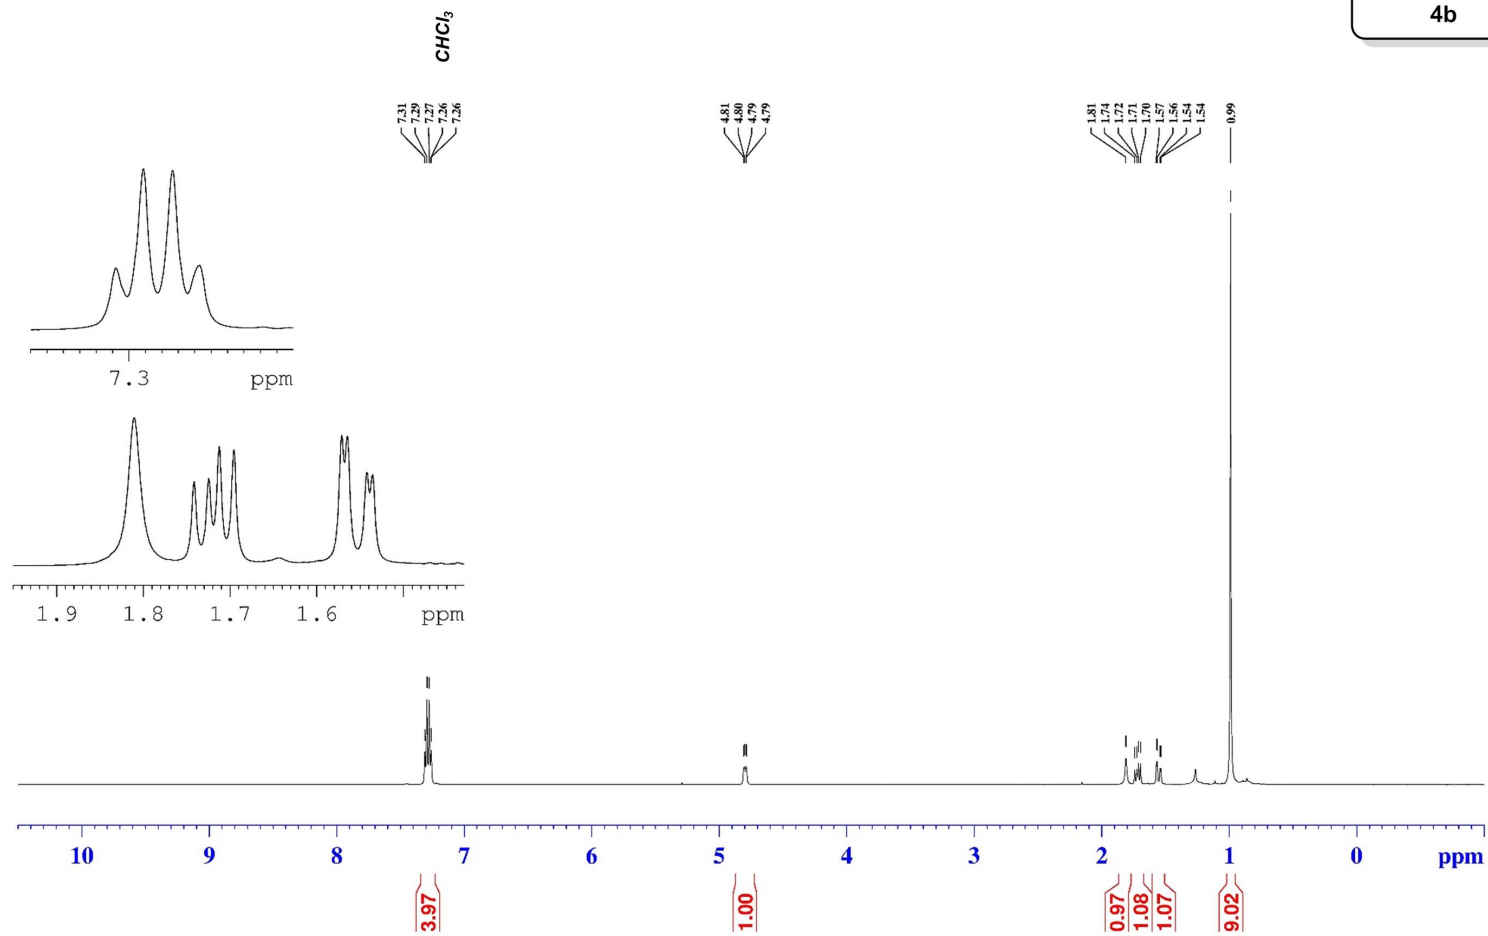

1-(4-chlorophenyl)-3,3-dimethylbutan-1-ol,  
125 MHz, CDCl<sub>3</sub>

<sup>13</sup>C NMR

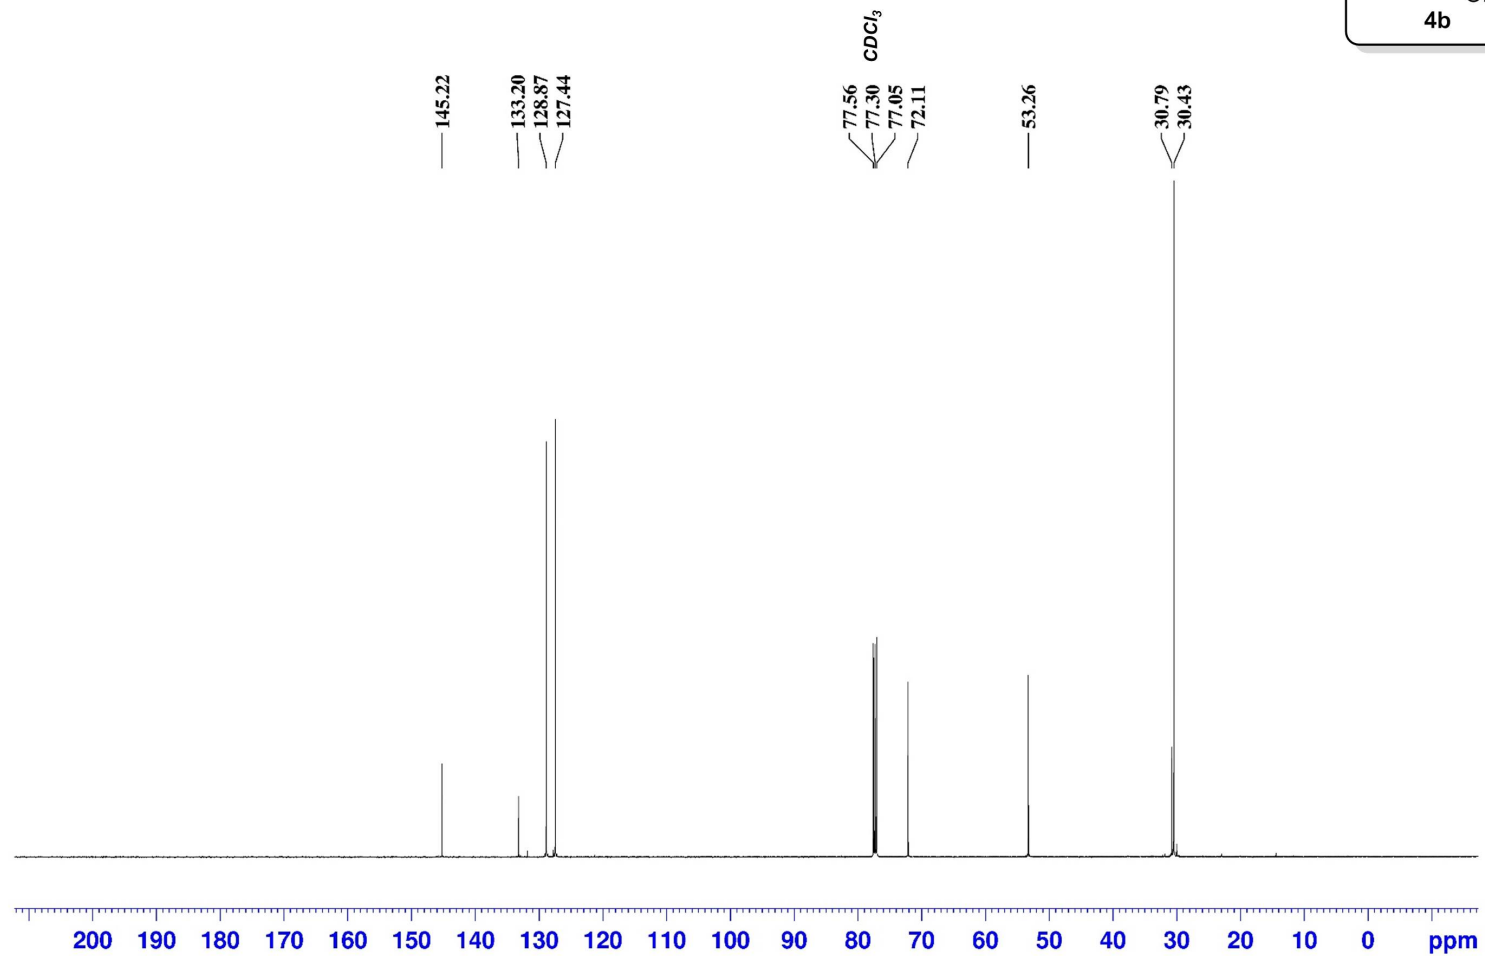

**<sup>1</sup>H NMR**

**1-chloro-4-(1-(4-methoxyphenyl)-3,3-dimethylbutyl)benzene**  
500 MHz, CDCl<sub>3</sub>

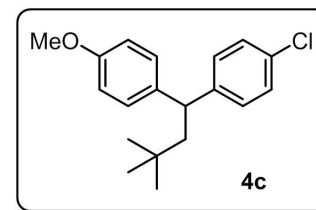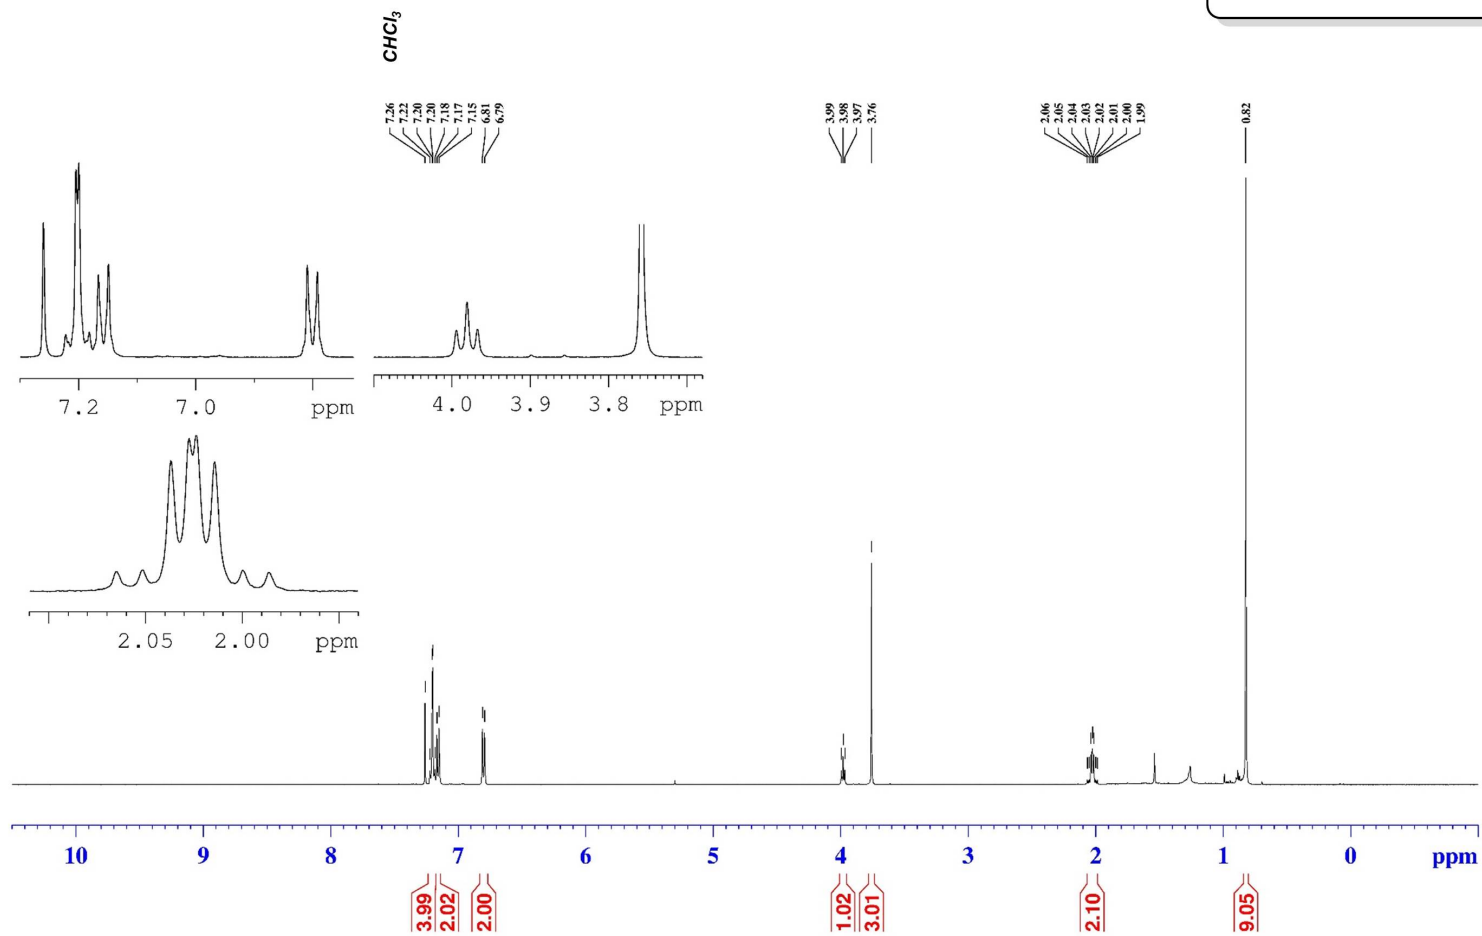

1-chloro-4-(1-(4-methoxyphenyl)-3,3-dimethylbutyl)benzene,  
125 MHz, CDCl<sub>3</sub>

<sup>13</sup>C NMR

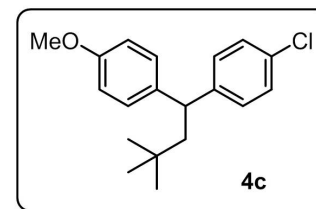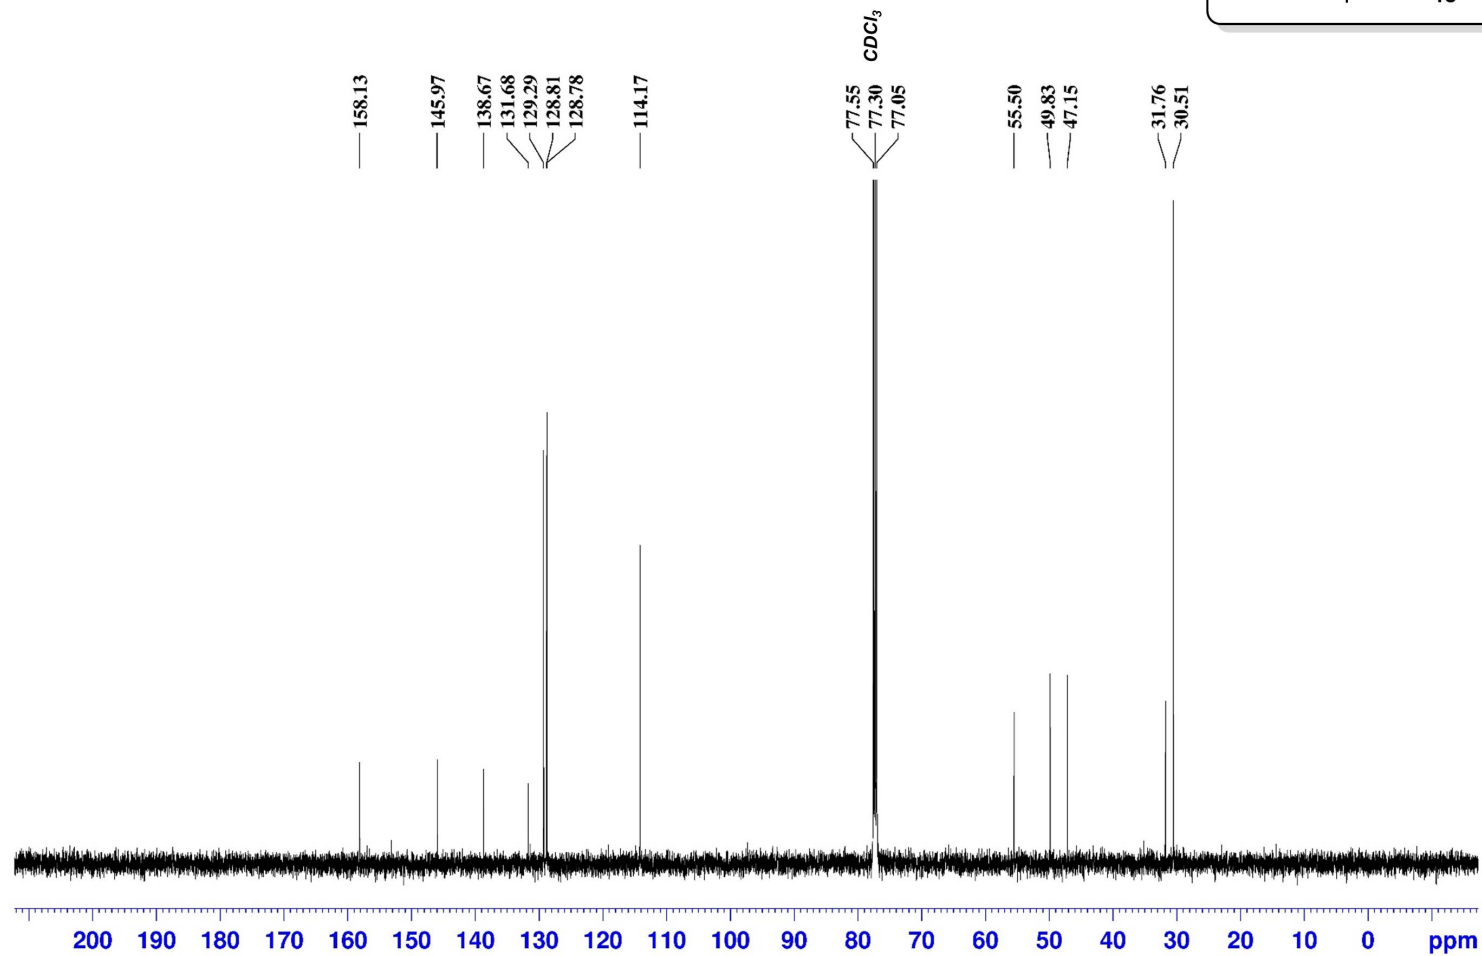

# <sup>1</sup>H NMR

Ethyl 2-fluoro-4-(1-hydroxy-3,3-dimethylbutyl)benzoate  
500 MHz, CDCl<sub>3</sub>

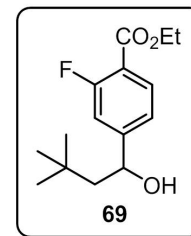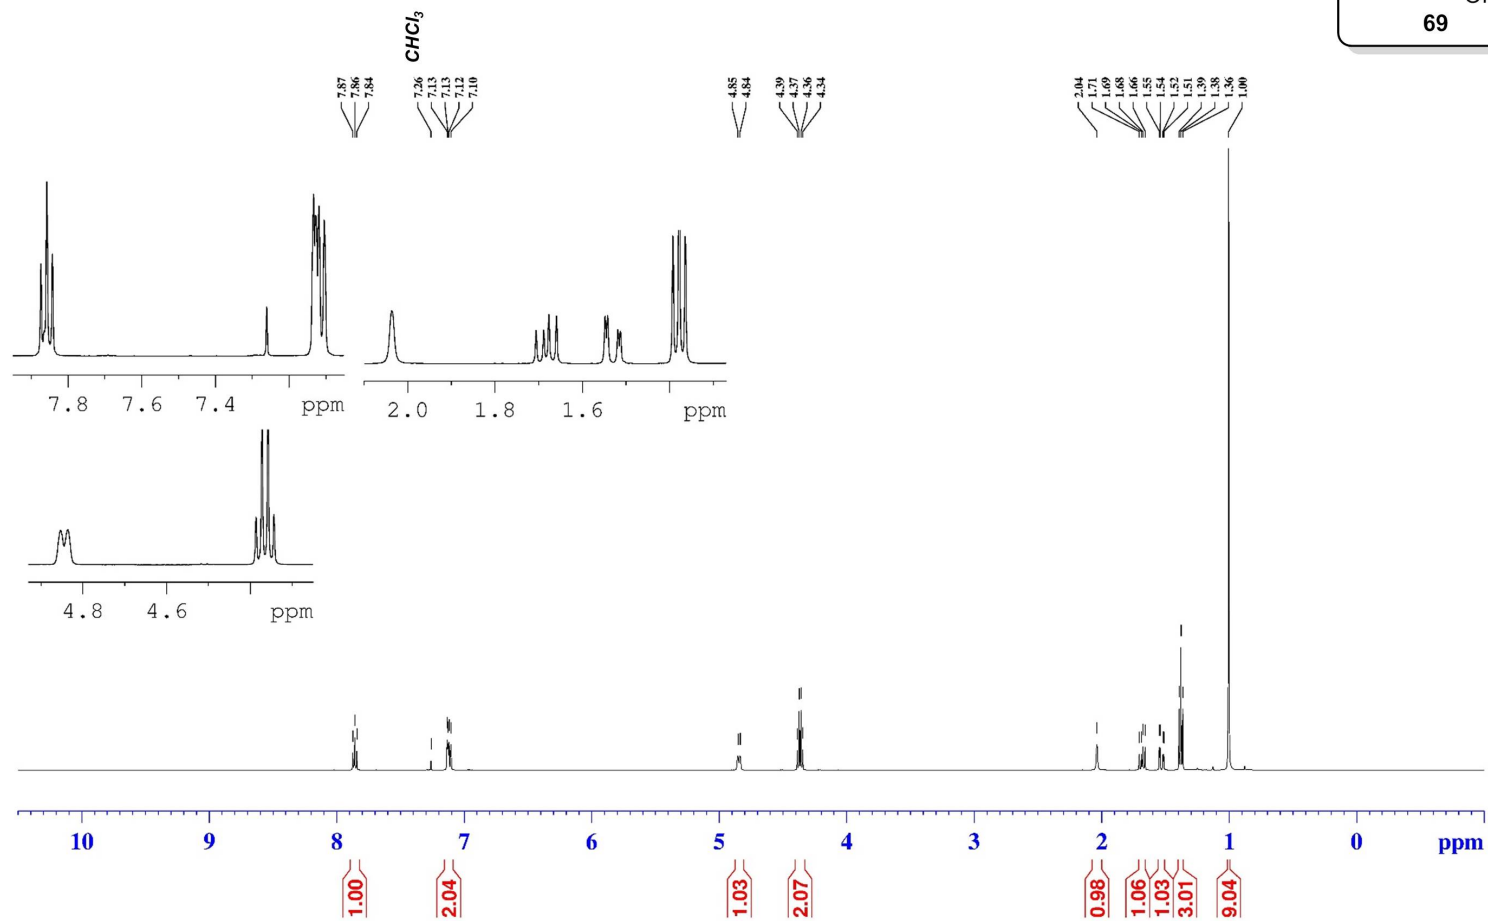

S350

Ethyl 2-fluoro-4-(1-hydroxy-3,3-dimethylbutyl)benzoate,  
125 MHz, CDCl<sub>3</sub>

<sup>13</sup>C NMR

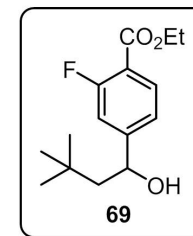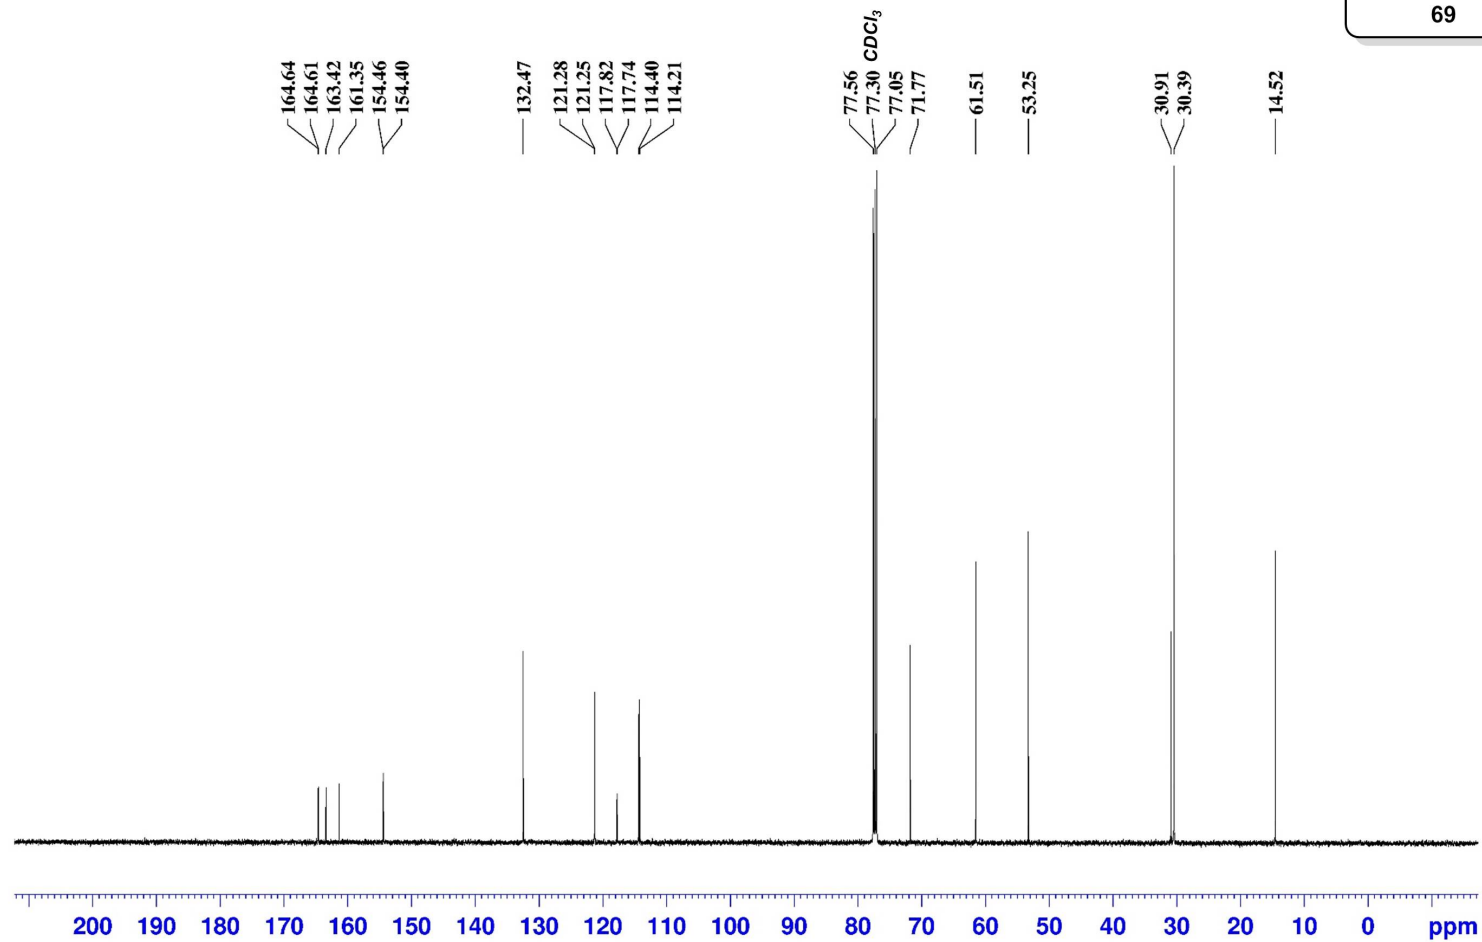

Ethyl 2-fluoro-4-(1-hydroxy-3,3-dimethylbutyl)benzoate  
471 MHz, CDCl<sub>3</sub>

<sup>19</sup>F NMR

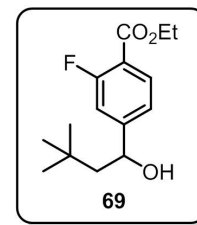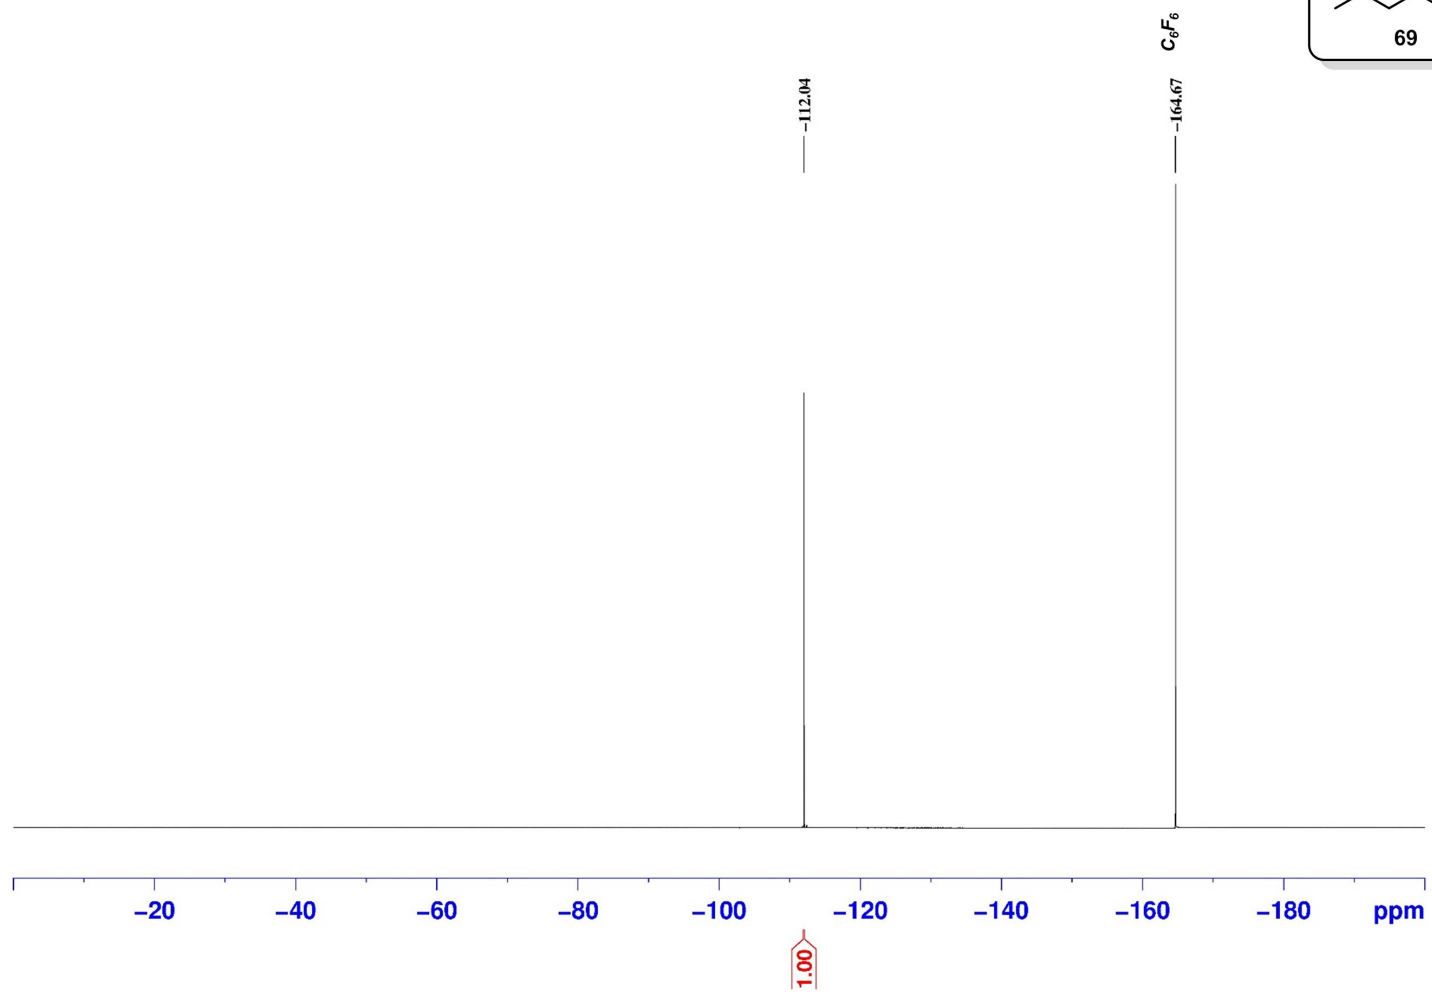

S352



# <sup>1</sup>H NMR

2-(3-chlorophenoxy)-4-(3,3-dimethyl-1-(4,4,5,5-tetramethyl-1,3,2-dioxaborolan-2-yl)butyl)benzonitrile  
500 MHz, CDCl<sub>3</sub>

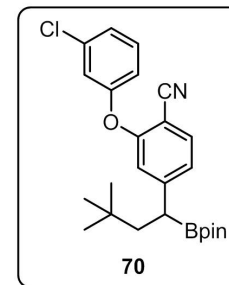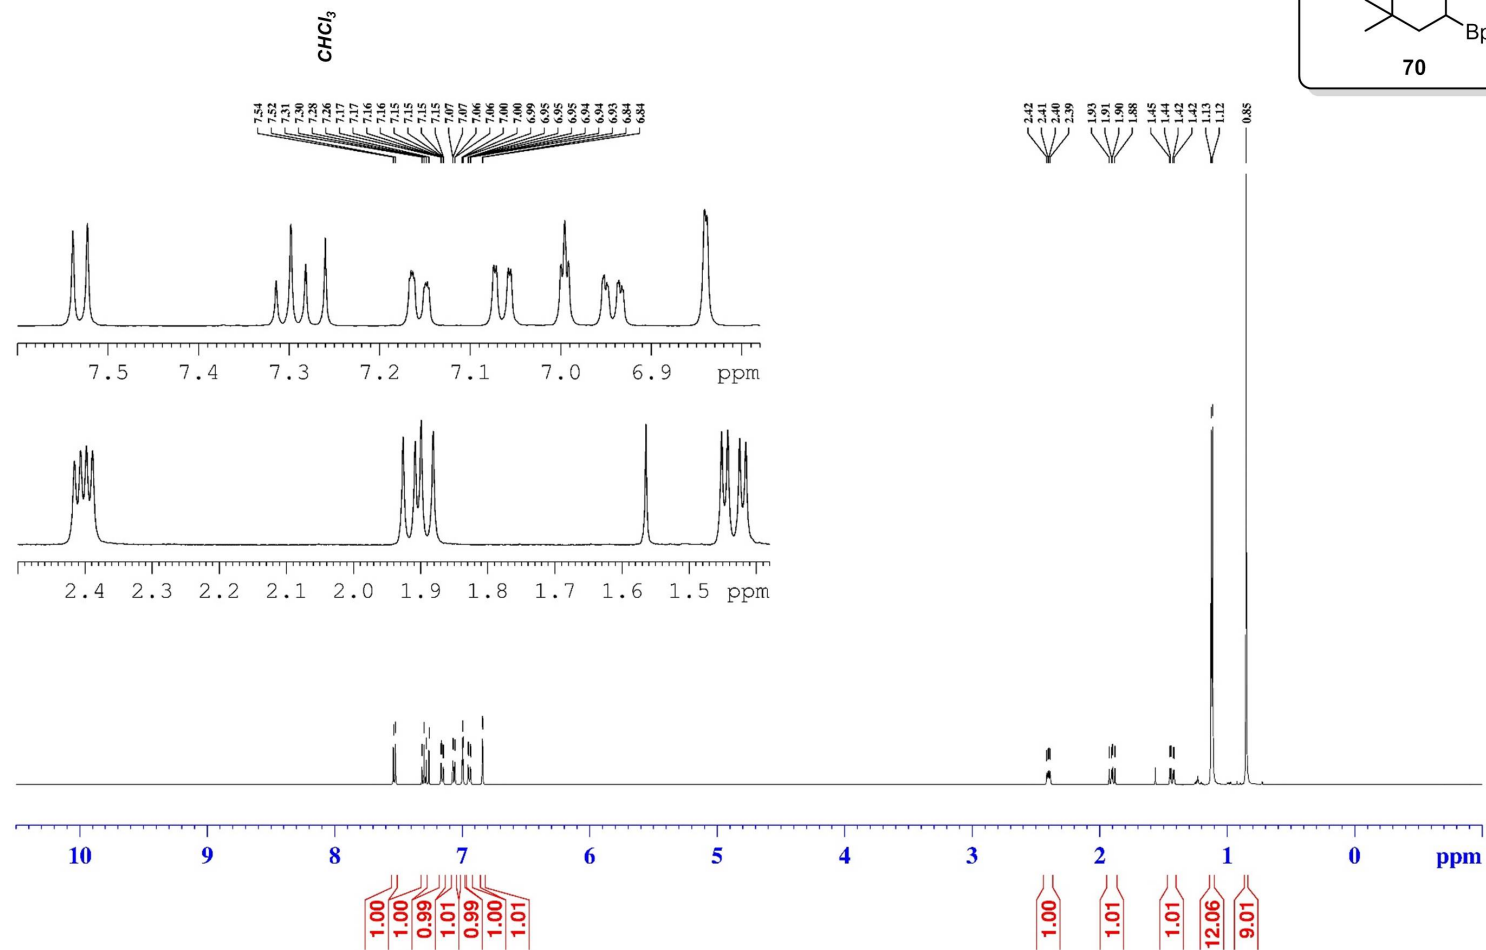

**<sup>13</sup>C NMR**

2-(3-chlorophenoxy)-4-(3,3-dimethyl-1-(4,4,5,5-tetramethyl-1,3,2-dioxaborolan-2-yl)butyl)benzonitrile,  
125 MHz, CDCl<sub>3</sub>

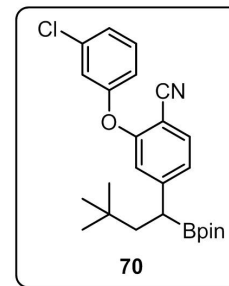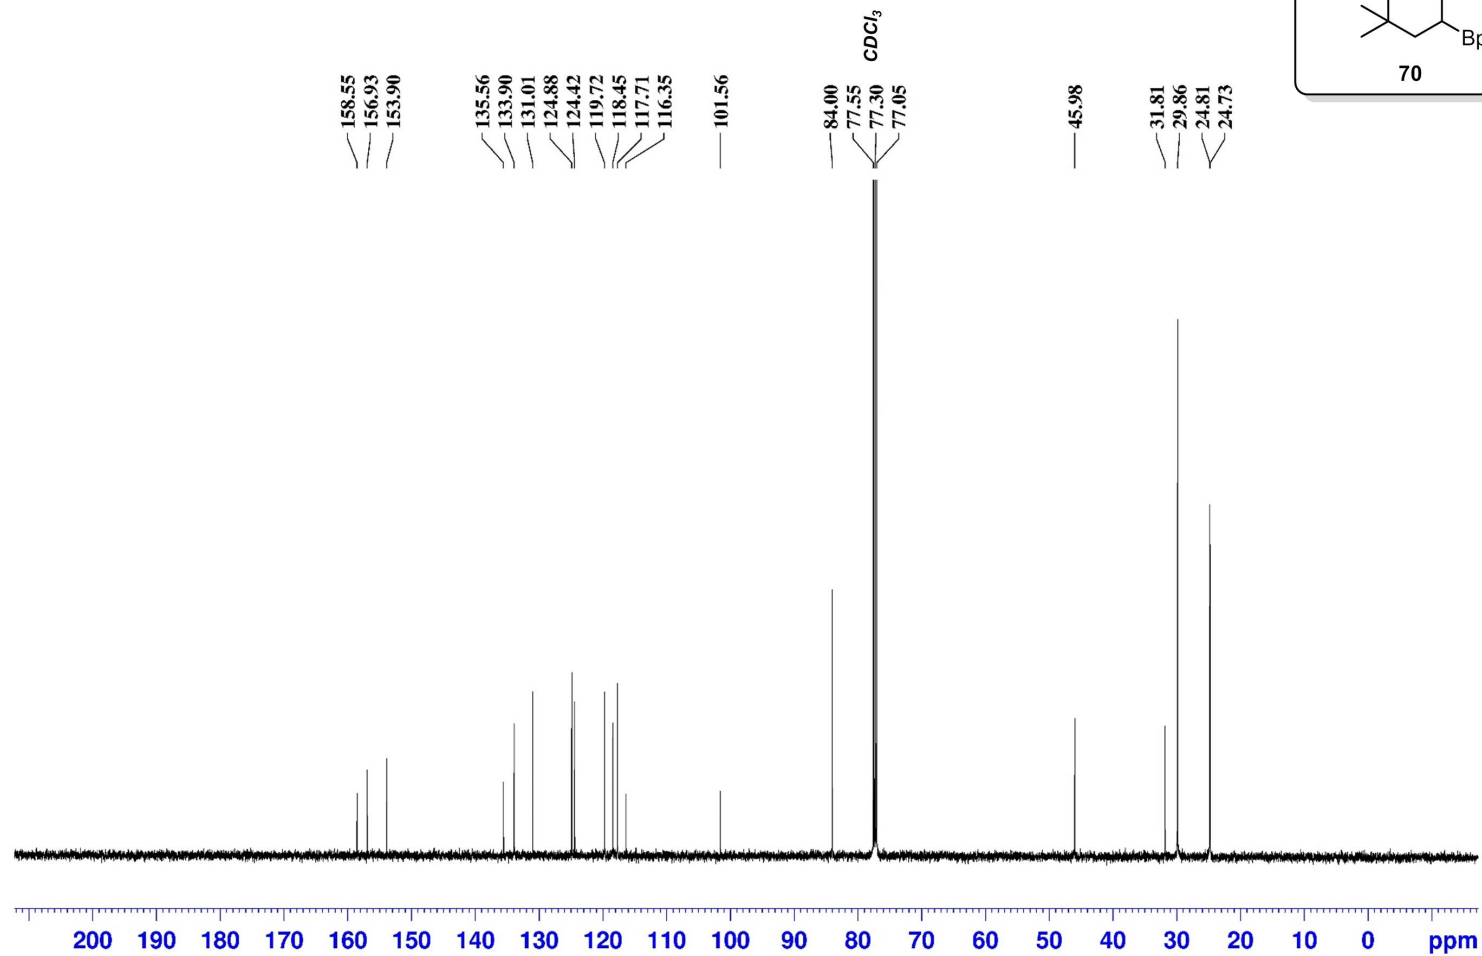

**<sup>11</sup>B NMR**

2-(3-chlorophenoxy)-4-(3,3-dimethyl-1-(4,4,5,5-tetramethyl-1,3,2-dioxaborolan-2-yl)butyl)benzonitrile,  
128 MHz, CDCl<sub>3</sub>

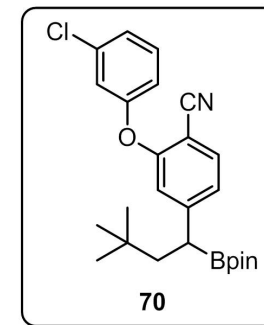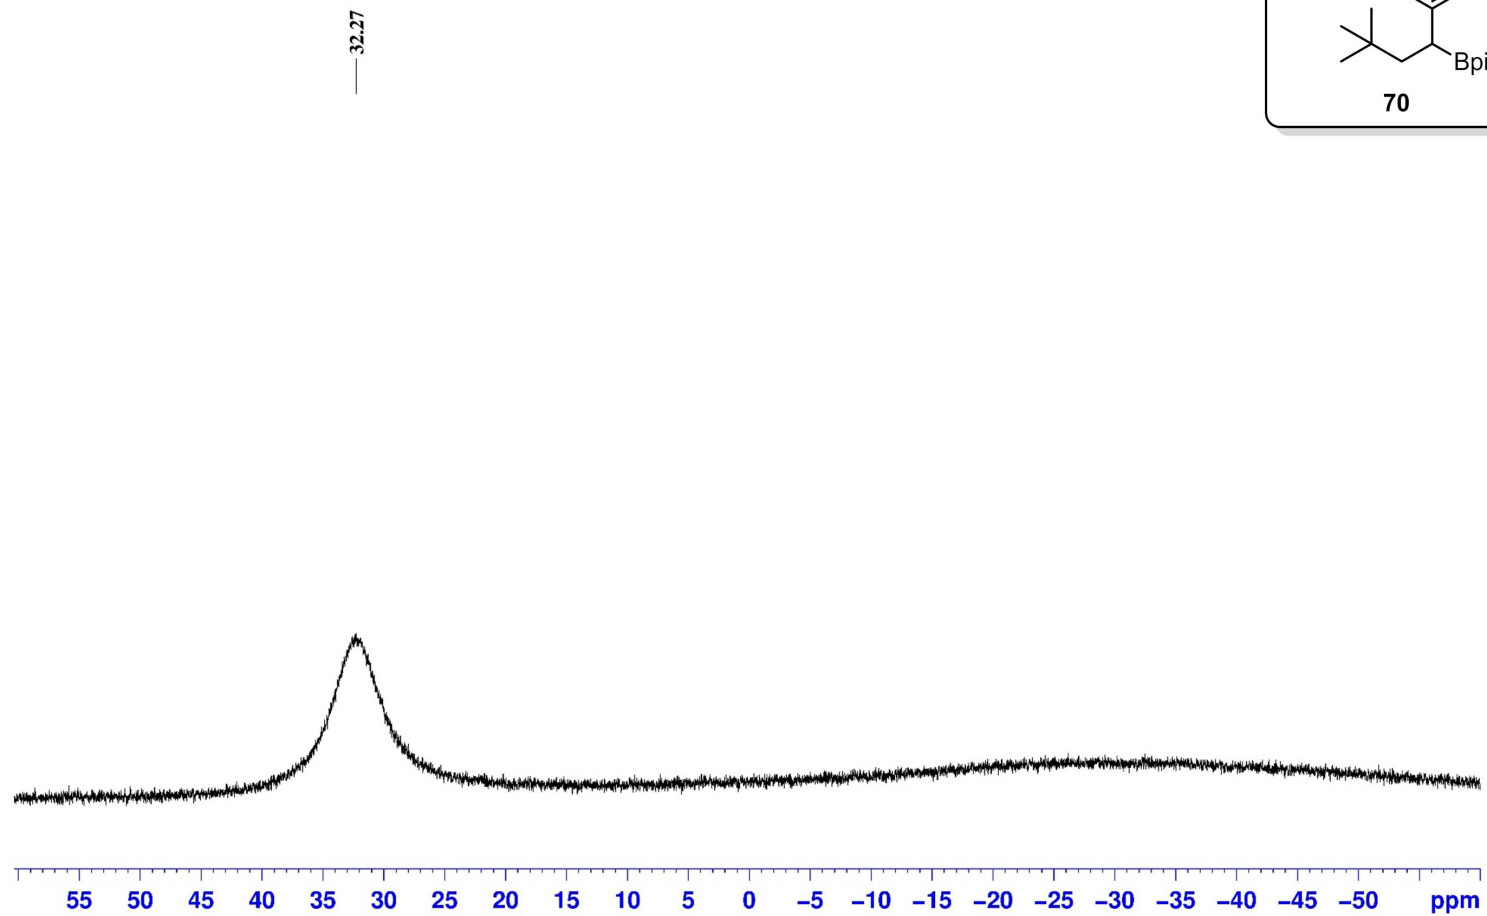

# <sup>1</sup>H NMR

4-(2-(adamantan-1-yl)-1-(4,4,5,5-tetramethyl-1,3,2-dioxaborolan-2-yl)ethyl)-2-(3-chlorophenoxy)benzonitrile  
500 MHz, CDCl<sub>3</sub>

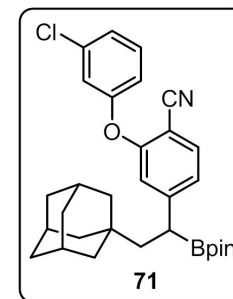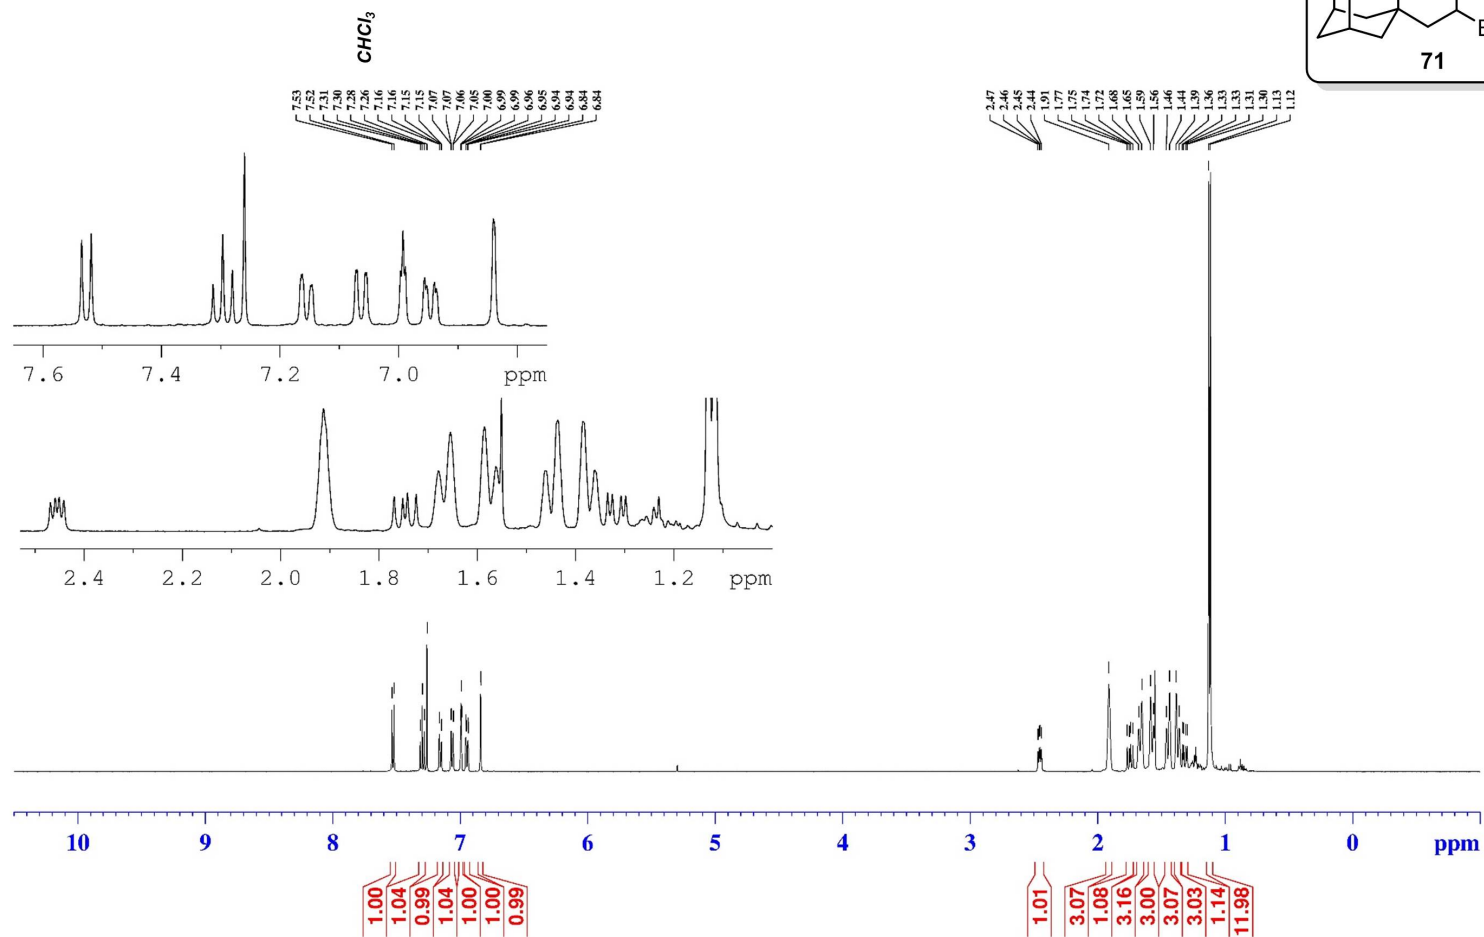

**<sup>13</sup>C NMR**

4-(2-(adamantan-1-yl)-1-(4,4,5,5-tetramethyl-1,3,2-dioxaborolan-2-yl)ethyl)-2-(3-chloro phenoxy)benzonitrile,  
125 MHz, CDCl<sub>3</sub>

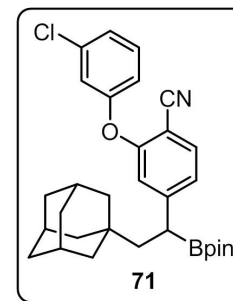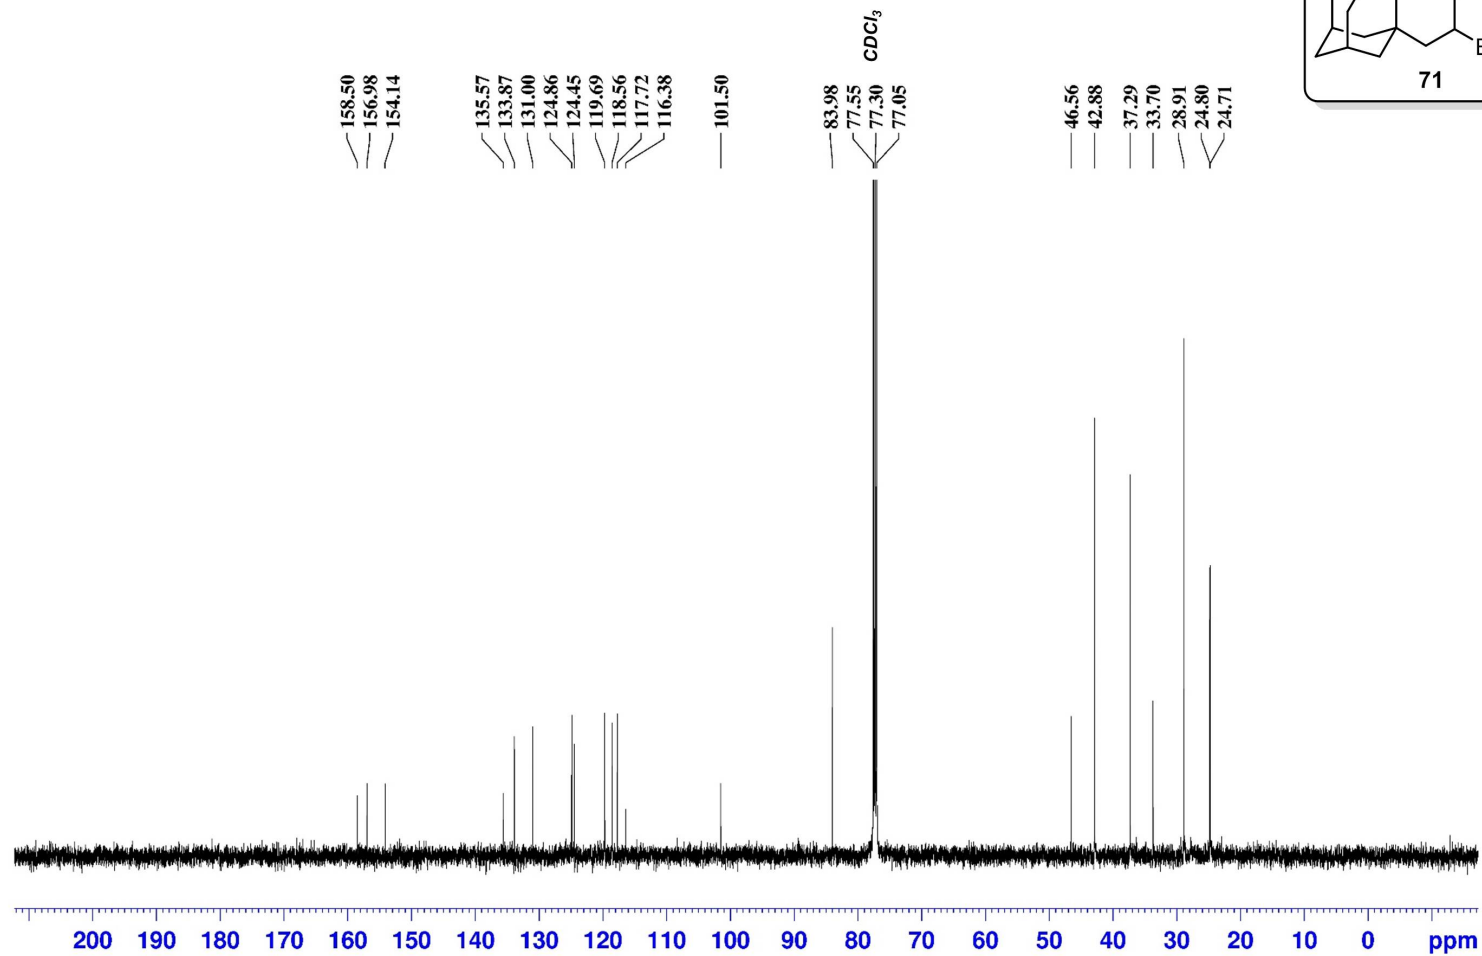

**<sup>11</sup>B NMR**

4-(2-(adamantan-1-yl)-1-(4,4,5,5-tetramethyl-1,3,2-dioxaborolan-2-yl)ethyl)-2-(3-chloro phenoxy)benzonitrile,  
128 MHz, CDCl<sub>3</sub>

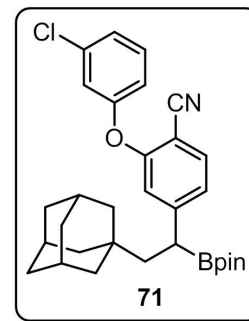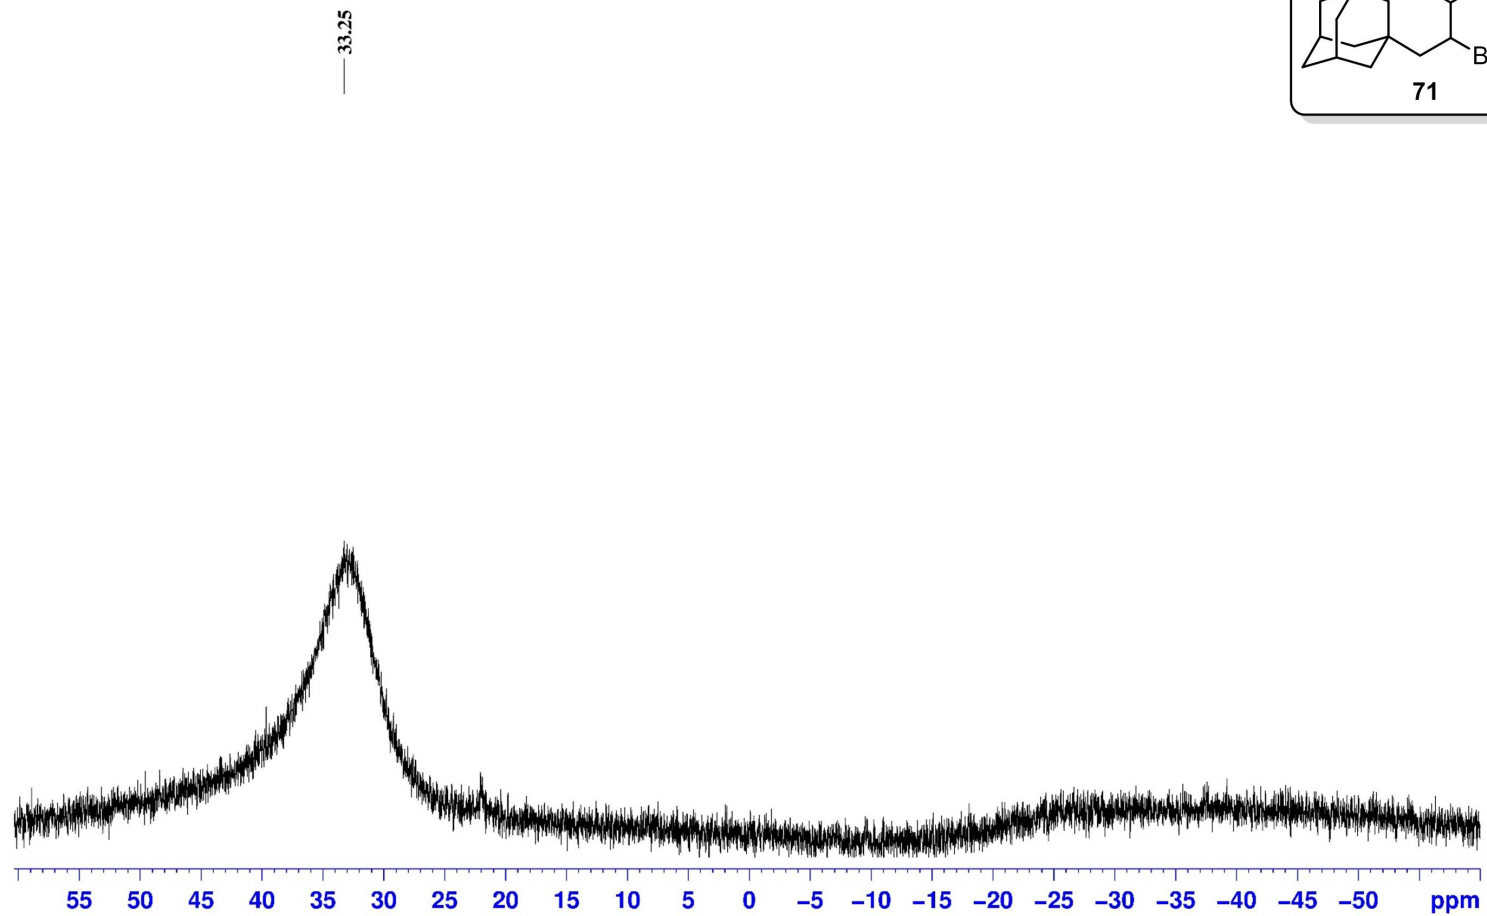

# <sup>1</sup>H NMR

2-(3-chlorophenoxy)-4-(2-(1-methyl-3-oxocyclopentyl)-1-(4,4,5,5-tetramethyl-1,3,2-dioxaborolan-2-yl)ethyl)benzonitrile  
500 MHz, CDCl<sub>3</sub>

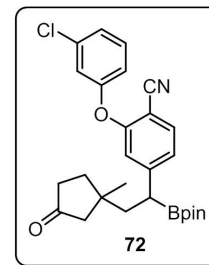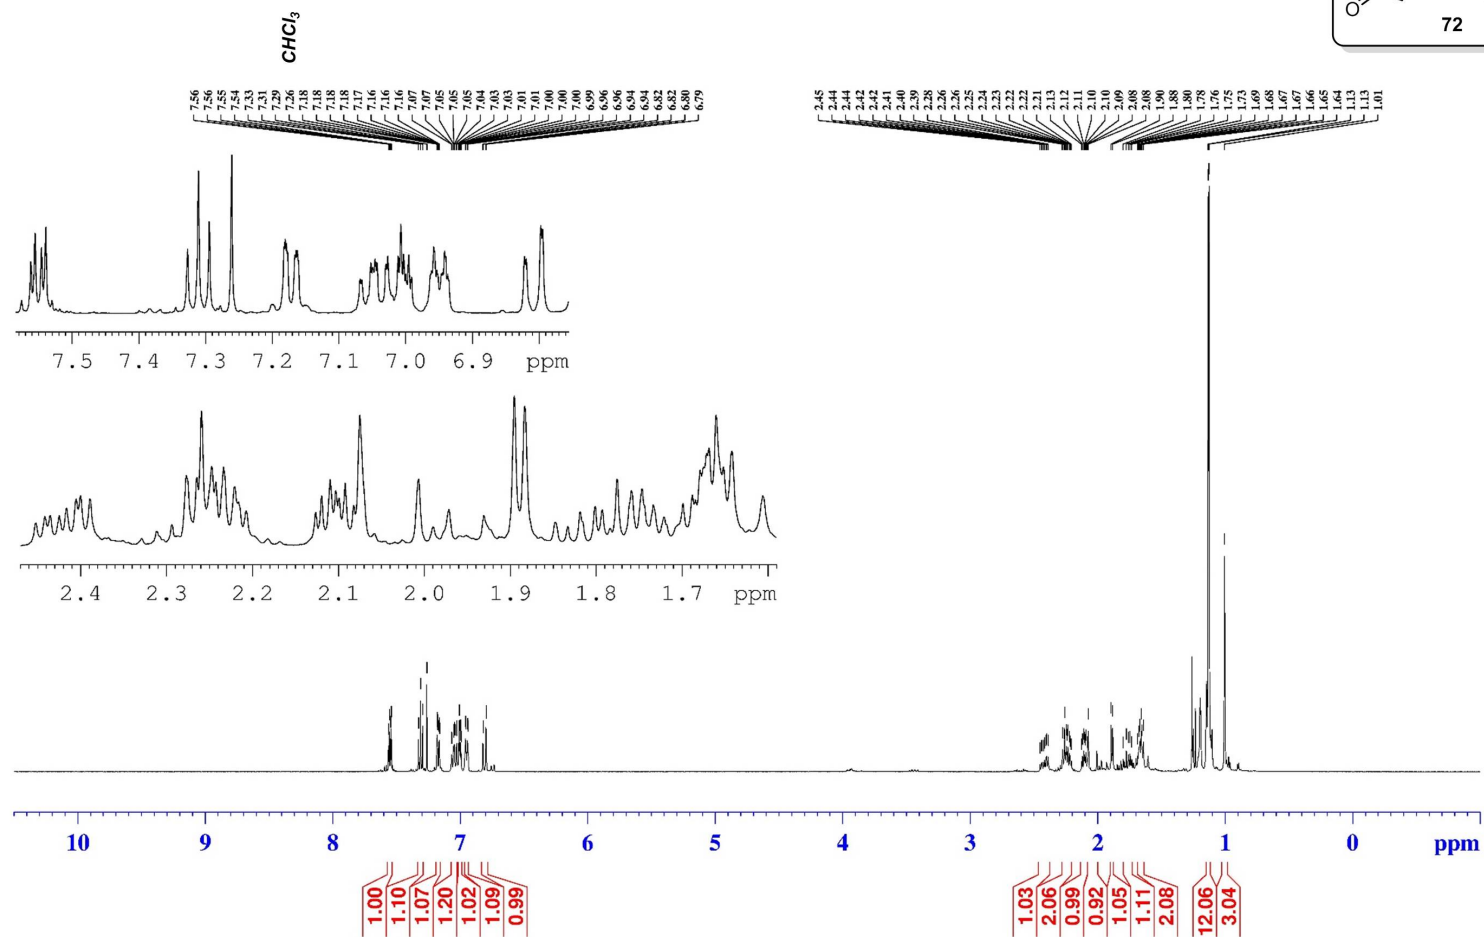

**<sup>13</sup>C NMR**

2-(3-chlorophenoxy)-4-(2-(1-methyl-3-oxocyclopentyl)-1-(4,4,5,5-tetramethyl-1,3,2-dioxaborolan-2-yl)ethyl)benzonitrile,  
125 MHz, CDCl<sub>3</sub>

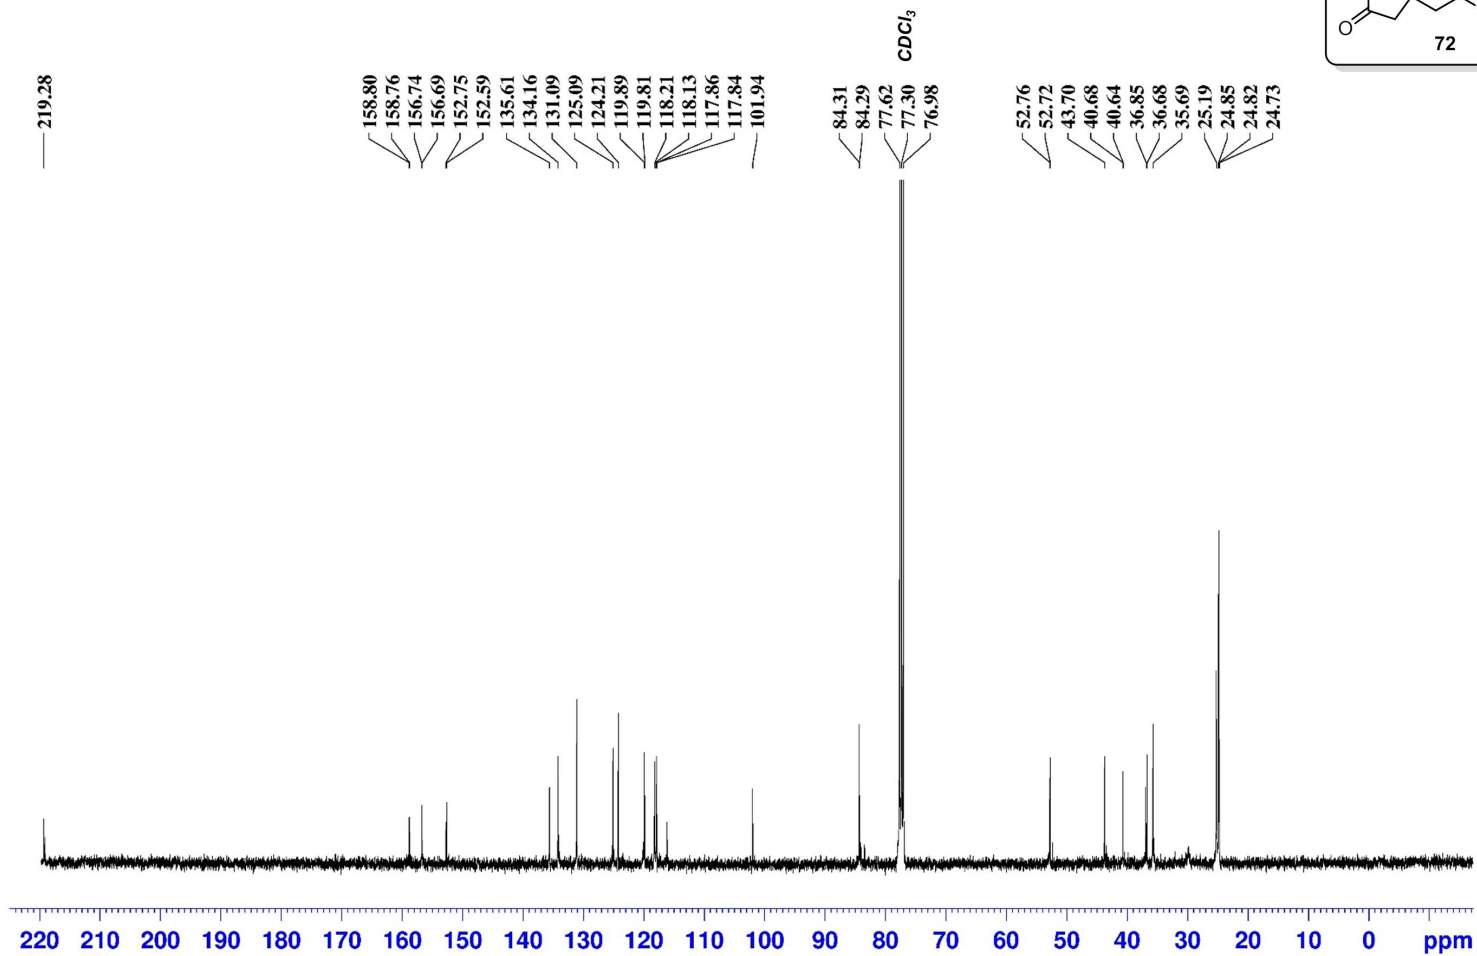



**<sup>11</sup>B NMR**

2-(3-chlorophenoxy)-4-(2-(1-methyl-3-oxocyclopentyl)-1-(4,4,5,5-tetramethyl-1,3,2-dioxaborolan-2-yl)ethyl)benzonitrile,  
128 MHz, CDCl<sub>3</sub>

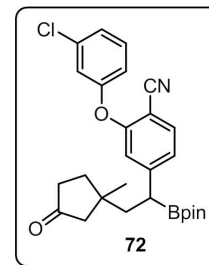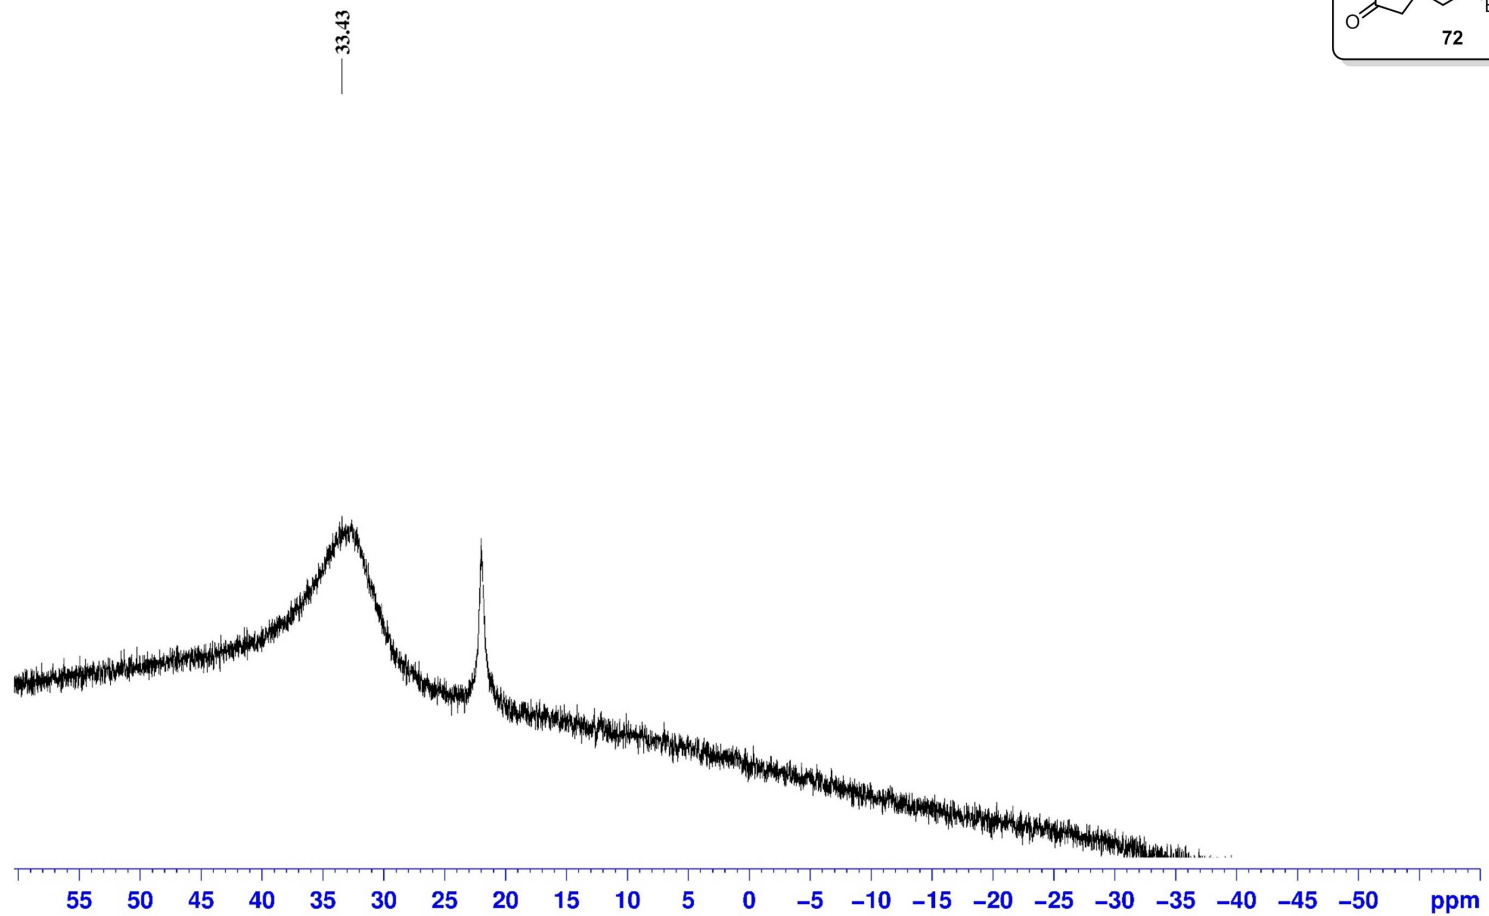

2-(3-chlorophenoxy)-4-(1-hydroxy-3,3-dimethylbutyl)benzonitrile  
500 MHz, CDCl<sub>3</sub>

<sup>1</sup>H NMR

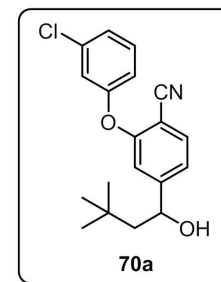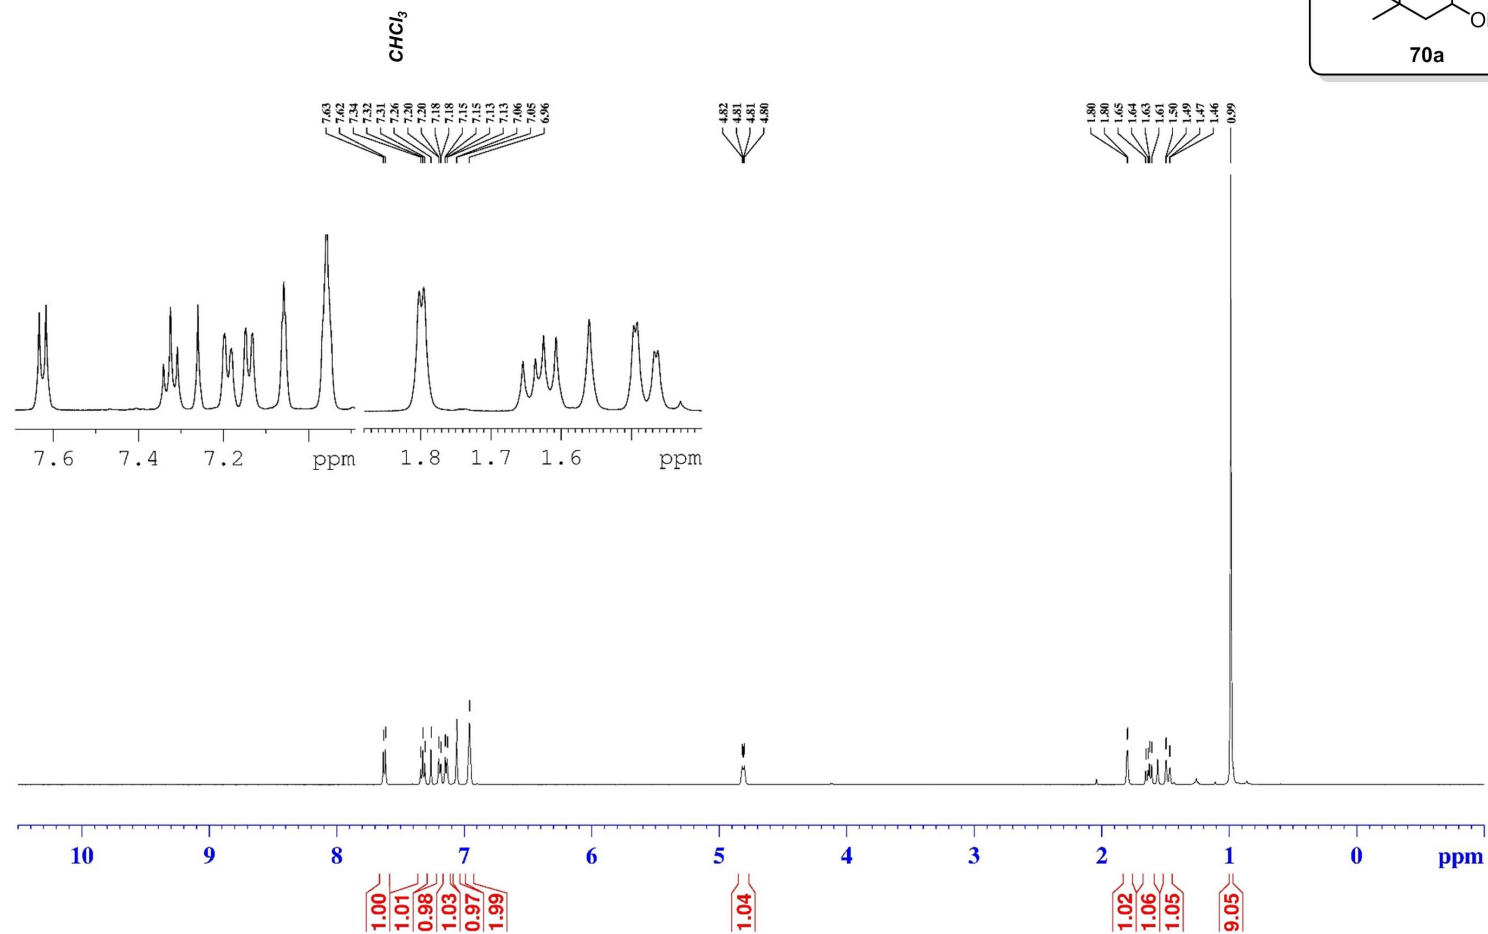

S362

**<sup>13</sup>C NMR**

2-(3-chlorophenoxy)-4-(1-hydroxy-3,3-dimethylbutyl)benzonitrile,  
125 MHz, CDCl<sub>3</sub>

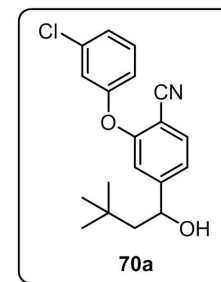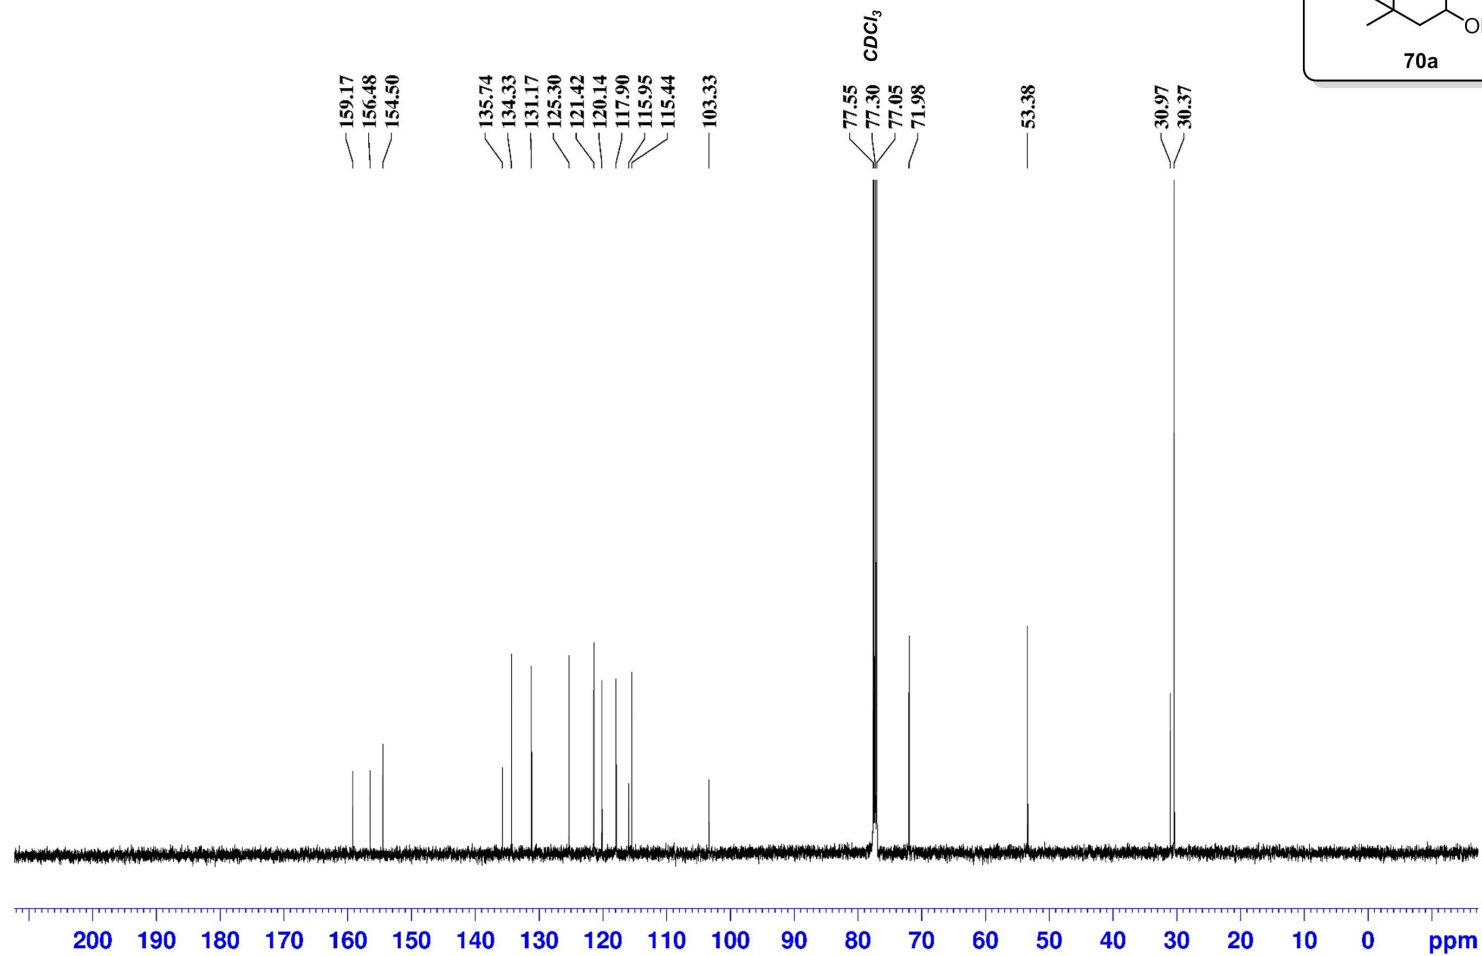

Supplement: NIHMS1575087-supplement-Supporting_Information.pdf [file NIHMS1575087-supplement-Supporting_Information.pdf]
